# Supplementary material for: Independent prognostic implications of RRM2 in lung adenocarcinoma
Source: PubMed Central journal article supplement (PMC7592001; doi:10.7150/jca.47895), 2020-10-17
Supplement: jcav11p7009s1.pdf [file jcav11p7009s1.pdf]

# Figure S1

**A****CDK1**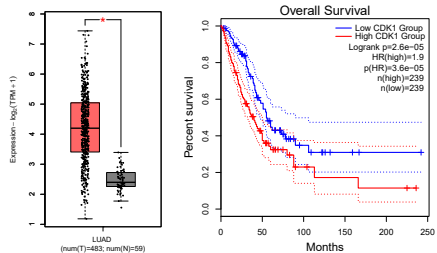**B****PLK1**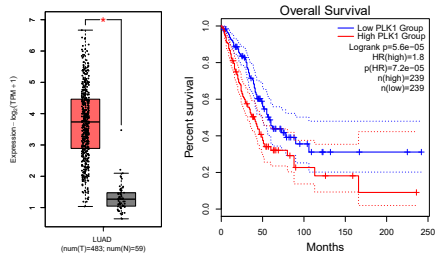**C****AURKB**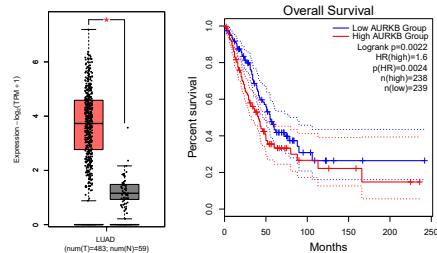**D****CDK2**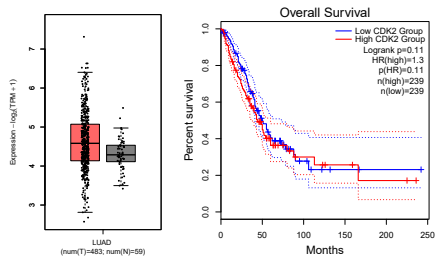**E****ATM**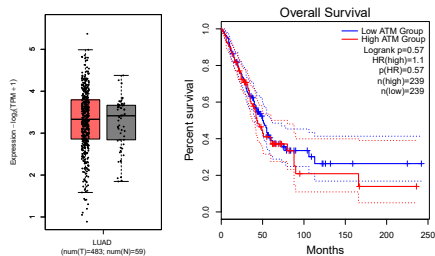

# Figure S2

**A**

Survival heatmap of B cell markers positively correlated with RRM2

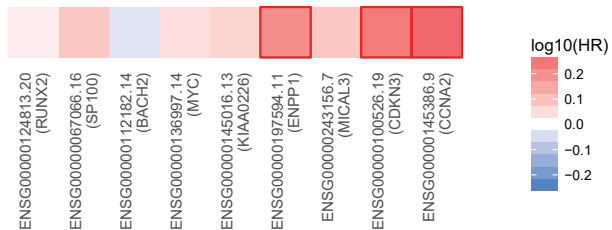**B**

Survival heatmap of B cell markers negatively correlated with RRM2

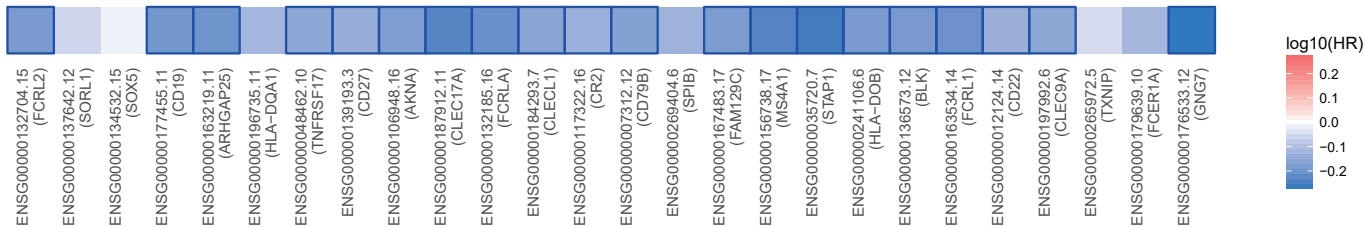

**Table S1. *RRM2* co-expressed genes.**

| Query    | Correlation coefficient | P-value  | FDR (BH) |
|----------|-------------------------|----------|----------|
| A1BG     | -0.0316                 | 4.74E-01 | 5.40E-01 |
| A1CF     | 0.086186                | 5.06E-02 | 7.46E-02 |
| A2BP1    | -0.13047                | 3.01E-03 | 5.61E-03 |
| A2LD1    | -0.02937                | 5.06E-01 | 5.70E-01 |
| A2ML1    | 0.101783                | 2.09E-02 | 3.33E-02 |
| A2M      | -0.48817                | 3.40E-32 | 1.00E-30 |
| A4GALT   | 0.142791                | 1.16E-03 | 2.30E-03 |
| A4GNT    | -0.18635                | 2.08E-05 | 5.34E-05 |
| AAA1     | 0.036435                | 4.09E-01 | 4.76E-01 |
| AAAS     | 0.134573                | 2.21E-03 | 4.20E-03 |
| AACSL    | -0.09888                | 2.48E-02 | 3.90E-02 |
| AACS     | 0.322311                | 6.50E-14 | 4.29E-13 |
| AADAACL2 | -0.02885                | 5.14E-01 | 5.77E-01 |
| AADAACL3 | 0.102615                | 1.98E-02 | 3.18E-02 |
| AADAACL4 | -0.11582                | 8.52E-03 | 1.46E-02 |
| AADAC    | -0.23809                | 4.53E-08 | 1.60E-07 |
| AADAT    | -0.17668                | 5.54E-05 | 1.34E-04 |
| AAGAB    | 0.356692                | 6.76E-17 | 5.95E-16 |
| AAK1     | -0.04779                | 2.79E-01 | 3.41E-01 |
| AAMP     | 0.047406                | 2.83E-01 | 3.45E-01 |
| AANAT    | 0.001069                | 9.81E-01 | 9.85E-01 |
| AARS2    | 0.031148                | 4.81E-01 | 5.46E-01 |
| AARSD1   | 0.123703                | 4.93E-03 | 8.88E-03 |
| AARS     | 0.091783                | 3.73E-02 | 5.65E-02 |
| AASDHPPT | 0.128745                | 3.42E-03 | 6.32E-03 |
| AASDH    | -0.07938                | 7.19E-02 | 1.03E-01 |
| AASS     | -0.3325                 | 9.26E-15 | 6.60E-14 |
| AATF     | 0.3225                  | 6.27E-14 | 4.15E-13 |
| AATK     | -0.34451                | 8.49E-16 | 6.72E-15 |
| ABAT     | -0.38862                | 5.18E-20 | 6.05E-19 |
| ABCA10   | -0.40972                | 2.88E-22 | 4.05E-21 |
| ABCA11P  | 0.079943                | 6.99E-02 | 1.00E-01 |
| ABCA12   | 0.172648                | 8.21E-05 | 1.94E-04 |
| ABCA13   | -0.20287                | 3.47E-06 | 9.86E-06 |
| ABCA17P  | -0.00583                | 8.95E-01 | 9.15E-01 |
| ABCA1    | -0.00335                | 9.40E-01 | 9.53E-01 |
| ABCA2    | -0.23239                | 9.59E-08 | 3.28E-07 |
| ABCA3    | -0.47785                | 9.74E-31 | 2.64E-29 |
| ABCA4    | -0.09957                | 2.38E-02 | 3.76E-02 |
| ABCA5    | -0.24222                | 2.60E-08 | 9.44E-08 |
| ABCA6    | -0.35907                | 4.06E-17 | 3.68E-16 |
| ABCA7    | -0.18772                | 1.80E-05 | 4.67E-05 |

|         |          |          |          |
|---------|----------|----------|----------|
| ABCA8   | -0.55129 | 2.79E-42 | 1.44E-40 |
| ABCA9   | -0.3459  | 6.41E-16 | 5.13E-15 |
| ABCB10  | 0.053028 | 2.30E-01 | 2.88E-01 |
| ABCB11  | 0.026768 | 5.44E-01 | 6.07E-01 |
| ABCB1   | -0.15577 | 3.88E-04 | 8.29E-04 |
| ABCB4   | -0.13932 | 1.53E-03 | 2.98E-03 |
| ABCB5   | -0.04535 | 3.04E-01 | 3.68E-01 |
| ABCB6   | 0.10085  | 2.21E-02 | 3.51E-02 |
| ABCB7   | 0.155918 | 3.83E-04 | 8.19E-04 |
| ABCB8   | -0.03334 | 4.50E-01 | 5.17E-01 |
| ABCB9   | 0.133348 | 2.43E-03 | 4.58E-03 |
| ABCC10  | -0.1357  | 2.03E-03 | 3.88E-03 |
| ABCC11  | 0.038591 | 3.82E-01 | 4.49E-01 |
| ABCC12  | -0.31203 | 4.30E-13 | 2.62E-12 |
| ABCC13  | -0.17342 | 7.62E-05 | 1.81E-04 |
| ABCC1   | 0.107398 | 1.48E-02 | 2.43E-02 |
| ABCC2   | 0.280616 | 8.97E-11 | 4.28E-10 |
| ABCC3   | -0.33497 | 5.72E-15 | 4.16E-14 |
| ABCC4   | -0.28283 | 6.29E-11 | 3.04E-10 |
| ABCC5   | 0.028173 | 5.24E-01 | 5.87E-01 |
| ABCC6P1 | -0.32725 | 2.55E-14 | 1.75E-13 |
| ABCC6P2 | -0.42354 | 7.80E-24 | 1.26E-22 |
| ABCC6   | -0.5498  | 5.12E-42 | 2.60E-40 |
| ABCC8   | -0.14064 | 1.38E-03 | 2.70E-03 |
| ABCC9   | -0.27581 | 1.92E-10 | 8.89E-10 |
| ABCD1   | 0.148968 | 6.96E-04 | 1.43E-03 |
| ABCD2   | -0.0346  | 4.33E-01 | 5.00E-01 |
| ABCD3   | -0.13778 | 1.72E-03 | 3.34E-03 |
| ABCD4   | -0.20737 | 2.07E-06 | 6.04E-06 |
| ABCE1   | 0.535919 | 1.26E-39 | 5.70E-38 |
| ABCF1   | 0.187553 | 1.84E-05 | 4.75E-05 |
| ABCF2   | 0.44702  | 1.15E-26 | 2.30E-25 |
| ABCF3   | 0.241892 | 2.72E-08 | 9.85E-08 |
| ABCG1   | -0.03555 | 4.21E-01 | 4.87E-01 |
| ABCG2   | -0.0418  | 3.44E-01 | 4.10E-01 |
| ABCG4   | 0.087012 | 4.84E-02 | 7.16E-02 |
| ABCG5   | 0.024029 | 5.86E-01 | 6.45E-01 |
| ABCG8   | 0.119458 | 6.65E-03 | 1.17E-02 |
| ABHD10  | 0.29872  | 4.48E-12 | 2.46E-11 |
| ABHD11  | -0.01299 | 7.69E-01 | 8.08E-01 |
| ABHD12B | -0.12424 | 4.75E-03 | 8.57E-03 |
| ABHD12  | 0.055022 | 2.13E-01 | 2.69E-01 |
| ABHD13  | -0.05985 | 1.75E-01 | 2.27E-01 |
| ABHD14A | -0.48269 | 2.05E-31 | 5.75E-30 |

|         |          |          |          |
|---------|----------|----------|----------|
| ABHD14B | -0.42222 | 1.11E-23 | 1.77E-22 |
| ABHD15  | -0.13622 | 1.95E-03 | 3.74E-03 |
| ABHD1   | 0.066117 | 1.34E-01 | 1.79E-01 |
| ABHD2   | -0.16025 | 2.61E-04 | 5.72E-04 |
| ABHD3   | 0.244032 | 2.03E-08 | 7.46E-08 |
| ABHD4   | 0.024755 | 5.75E-01 | 6.35E-01 |
| ABHD5   | 0.175477 | 6.24E-05 | 1.50E-04 |
| ABHD6   | -0.0745  | 9.12E-02 | 1.27E-01 |
| ABHD8   | 0.008477 | 8.48E-01 | 8.75E-01 |
| ABI1    | 0.126038 | 4.17E-03 | 7.59E-03 |
| ABI2    | 0.066412 | 1.32E-01 | 1.77E-01 |
| ABI3BP  | -0.40579 | 7.80E-22 | 1.06E-20 |
| ABI3    | -0.08963 | 4.20E-02 | 6.30E-02 |
| ABL1    | -0.07884 | 7.38E-02 | 1.05E-01 |
| ABL2    | 0.035757 | 4.18E-01 | 4.84E-01 |
| ABLIM1  | -0.22321 | 3.09E-07 | 9.99E-07 |
| ABLIM2  | -0.29386 | 1.02E-11 | 5.39E-11 |
| ABLIM3  | -0.07635 | 8.34E-02 | 1.17E-01 |
| ABO     | -0.44037 | 7.66E-26 | 1.45E-24 |
| ABP1    | -0.17275 | 8.13E-05 | 1.92E-04 |
| ABRA    | -0.2502  | 8.62E-09 | 3.31E-08 |
| ABR     | -0.20352 | 3.22E-06 | 9.19E-06 |
| ABT1    | 0.148741 | 7.09E-04 | 1.46E-03 |
| ABTB1   | -0.45668 | 6.74E-28 | 1.49E-26 |
| ABTB2   | 0.080403 | 6.83E-02 | 9.80E-02 |
| ACAA1   | -0.39497 | 1.13E-20 | 1.40E-19 |
| ACAA2   | 0.043785 | 3.21E-01 | 3.86E-01 |
| ACACA   | 0.011028 | 8.03E-01 | 8.37E-01 |
| ACACB   | -0.33586 | 4.80E-15 | 3.52E-14 |
| ACAD10  | -0.22853 | 1.58E-07 | 5.27E-07 |
| ACAD11  | -0.1371  | 1.82E-03 | 3.51E-03 |
| ACAD8   | -0.38178 | 2.57E-19 | 2.83E-18 |
| ACAD9   | 0.238648 | 4.20E-08 | 1.49E-07 |
| ACADL   | -0.34865 | 3.64E-16 | 2.97E-15 |
| ACADM   | -0.03099 | 4.83E-01 | 5.48E-01 |
| ACADSB  | -0.45742 | 5.40E-28 | 1.21E-26 |
| ACADS   | -0.35309 | 1.45E-16 | 1.23E-15 |
| ACADV1  | -0.27986 | 1.01E-10 | 4.81E-10 |
| ACAN    | 0.145825 | 9.03E-04 | 1.83E-03 |
| ACAP1   | -0.13414 | 2.28E-03 | 4.33E-03 |
| ACAP2   | 0.265444 | 9.40E-10 | 4.03E-09 |
| ACAP3   | -0.17384 | 7.32E-05 | 1.74E-04 |
| ACAT1   | -0.27319 | 2.88E-10 | 1.32E-09 |
| ACAT2   | 0.358492 | 4.60E-17 | 4.15E-16 |

|        |          |          |          |
|--------|----------|----------|----------|
| ACBD3  | -0.02431 | 5.82E-01 | 6.41E-01 |
| ACBD4  | -0.34461 | 8.33E-16 | 6.59E-15 |
| ACBD5  | 0.141385 | 1.30E-03 | 2.56E-03 |
| ACBD6  | 0.100911 | 2.20E-02 | 3.49E-02 |
| ACBD7  | 0.254553 | 4.64E-09 | 1.84E-08 |
| ACCN1  | -0.05915 | 1.80E-01 | 2.33E-01 |
| ACCN2  | 0.107396 | 1.48E-02 | 2.43E-02 |
| ACCN3  | -0.08794 | 4.61E-02 | 6.85E-02 |
| ACCN4  | -0.04322 | 3.28E-01 | 3.93E-01 |
| ACCN5  | -0.05188 | 2.40E-01 | 2.99E-01 |
| ACCSL  | -0.07262 | 9.97E-02 | 1.37E-01 |
| ACCS   | -0.45013 | 4.65E-27 | 9.59E-26 |
| ACD    | 0.117262 | 7.73E-03 | 1.34E-02 |
| ACE2   | -0.29142 | 1.54E-11 | 7.94E-11 |
| ACER1  | -0.16745 | 1.35E-04 | 3.08E-04 |
| ACER2  | -0.09079 | 3.94E-02 | 5.94E-02 |
| ACER3  | 0.225592 | 2.29E-07 | 7.53E-07 |
| ACE    | -0.18703 | 1.94E-05 | 5.00E-05 |
| ACHE   | -0.15612 | 3.76E-04 | 8.06E-04 |
| ACIN1  | -0.09617 | 2.91E-02 | 4.50E-02 |
| ACLY   | 0.420555 | 1.73E-23 | 2.70E-22 |
| ACMSD  | -0.10867 | 1.36E-02 | 2.26E-02 |
| ACN9   | 0.253478 | 5.41E-09 | 2.13E-08 |
| ACO1   | 0.008595 | 8.46E-01 | 8.74E-01 |
| ACO2   | 0.040145 | 3.63E-01 | 4.30E-01 |
| ACOT11 | 0.081847 | 6.35E-02 | 9.17E-02 |
| ACOT12 | 0.088927 | 4.37E-02 | 6.52E-02 |
| ACOT13 | 0.068975 | 1.18E-01 | 1.60E-01 |
| ACOT1  | -0.21493 | 8.50E-07 | 2.60E-06 |
| ACOT2  | -0.11874 | 6.98E-03 | 1.22E-02 |
| ACOT4  | 0.108507 | 1.38E-02 | 2.28E-02 |
| ACOT6  | 0.142851 | 1.15E-03 | 2.29E-03 |
| ACOT7  | 0.441927 | 4.93E-26 | 9.51E-25 |
| ACOT8  | 0.022106 | 6.17E-01 | 6.73E-01 |
| ACOT9  | 0.280532 | 9.09E-11 | 4.33E-10 |
| ACOX1  | -0.13525 | 2.10E-03 | 4.00E-03 |
| ACOX2  | -0.37523 | 1.16E-18 | 1.19E-17 |
| ACOX3  | -0.27777 | 1.41E-10 | 6.61E-10 |
| ACOXL  | -0.4884  | 3.15E-32 | 9.34E-31 |
| ACP1   | 0.471564 | 7.13E-30 | 1.82E-28 |
| ACP2   | 0.097838 | 2.64E-02 | 4.12E-02 |
| ACP5   | -0.13593 | 1.99E-03 | 3.82E-03 |
| ACP6   | -0.07739 | 7.93E-02 | 1.12E-01 |
| ACPL2  | 0.110512 | 1.21E-02 | 2.02E-02 |

|        |          |          |          |
|--------|----------|----------|----------|
| ACPP   | -0.04215 | 3.40E-01 | 4.05E-01 |
| ACPT   | 0.090015 | 4.12E-02 | 6.18E-02 |
| ACRBP  | 0.051824 | 2.40E-01 | 3.00E-01 |
| ACRC   | -0.03432 | 4.37E-01 | 5.04E-01 |
| ACRV1  | 0.416848 | 4.57E-23 | 6.89E-22 |
| ACR    | -0.07669 | 8.21E-02 | 1.16E-01 |
| ACSBG1 | -0.36146 | 2.43E-17 | 2.25E-16 |
| ACSBG2 | -0.05021 | 2.55E-01 | 3.16E-01 |
| ACSF2  | -0.14118 | 1.32E-03 | 2.60E-03 |
| ACSF3  | -0.2967  | 6.32E-12 | 3.41E-11 |
| ACSL1  | -0.13267 | 2.55E-03 | 4.81E-03 |
| ACSL3  | 0.095052 | 3.10E-02 | 4.78E-02 |
| ACSL4  | 0.108818 | 1.35E-02 | 2.24E-02 |
| ACSL5  | -0.43856 | 1.28E-25 | 2.38E-24 |
| ACSL6  | -0.01842 | 6.77E-01 | 7.27E-01 |
| ACSM1  | -0.3828  | 2.03E-19 | 2.26E-18 |
| ACSM2A | -0.14955 | 6.62E-04 | 1.37E-03 |
| ACSM2B | -0.09936 | 2.41E-02 | 3.80E-02 |
| ACSM3  | -0.43775 | 1.60E-25 | 2.94E-24 |
| ACSM4  | 0.073757 | 9.45E-02 | 1.31E-01 |
| ACSM5  | -0.30923 | 7.11E-13 | 4.24E-12 |
| ACSS1  | -0.53072 | 9.28E-39 | 4.00E-37 |
| ACSS2  | -0.28056 | 9.05E-11 | 4.31E-10 |
| ACSS3  | -0.02948 | 5.04E-01 | 5.69E-01 |
| ACTA1  | 0.045211 | 3.06E-01 | 3.70E-01 |
| ACTA2  | -0.07346 | 9.58E-02 | 1.33E-01 |
| ACTBL2 | 0.020453 | 6.43E-01 | 6.98E-01 |
| ACTB   | 0.185652 | 2.24E-05 | 5.72E-05 |
| ACTC1  | -0.08369 | 5.77E-02 | 8.40E-02 |
| ACTG1  | 0.3263   | 3.06E-14 | 2.08E-13 |
| ACTG2  | -0.11782 | 7.44E-03 | 1.29E-02 |
| ACTL6A | 0.556985 | 2.67E-43 | 1.44E-41 |
| ACTL6B | 0.125158 | 4.45E-03 | 8.05E-03 |
| ACTL7A | -0.0675  | 1.26E-01 | 1.69E-01 |
| ACTL7B | -0.11425 | 9.46E-03 | 1.61E-02 |
| ACTL8  | 0.240448 | 3.30E-08 | 1.19E-07 |
| ACTL9  | 0.118606 | 7.05E-03 | 1.23E-02 |
| ACTN1  | 0.281269 | 8.08E-11 | 3.87E-10 |
| ACTN2  | -0.35488 | 9.91E-17 | 8.59E-16 |
| ACTN3  | 0.118646 | 7.03E-03 | 1.23E-02 |
| ACTN4  | 0.118104 | 7.29E-03 | 1.27E-02 |
| ACTR10 | 0.051574 | 2.43E-01 | 3.03E-01 |
| ACTR1A | -0.0419  | 3.43E-01 | 4.08E-01 |
| ACTR1B | -0.17912 | 4.35E-05 | 1.07E-04 |

|          |          |          |          |
|----------|----------|----------|----------|
| ACTR2    | 0.390745 | 3.12E-20 | 3.72E-19 |
| ACTR3B   | 0.165452 | 1.62E-04 | 3.67E-04 |
| ACTR3C   | -0.09944 | 2.40E-02 | 3.78E-02 |
| ACTR3    | 0.552274 | 1.87E-42 | 9.73E-41 |
| ACTR5    | 0.117767 | 7.46E-03 | 1.30E-02 |
| ACTR6    | 0.311054 | 5.13E-13 | 3.11E-12 |
| ACTR8    | -0.01184 | 7.89E-01 | 8.25E-01 |
| ACTRT1   | 0.005723 | 8.97E-01 | 9.17E-01 |
| ACTRT2   | -0.01784 | 6.86E-01 | 7.36E-01 |
| ACVR1B   | -0.18939 | 1.51E-05 | 3.96E-05 |
| ACVR1C   | 0.231728 | 1.05E-07 | 3.56E-07 |
| ACVR1    | -0.09742 | 2.71E-02 | 4.21E-02 |
| ACVR2A   | -0.31414 | 2.94E-13 | 1.83E-12 |
| ACVR2B   | -0.01317 | 7.66E-01 | 8.05E-01 |
| ACVRL1   | -0.22693 | 1.94E-07 | 6.41E-07 |
| ACY1     | -0.04948 | 2.62E-01 | 3.24E-01 |
| ACY3     | 0.010322 | 8.15E-01 | 8.48E-01 |
| ACYP1    | 0.300988 | 3.03E-12 | 1.69E-11 |
| ACYP2    | -0.20028 | 4.64E-06 | 1.30E-05 |
| ADAD1    | 0.090146 | 4.09E-02 | 6.14E-02 |
| ADAD2    | -0.02031 | 6.46E-01 | 7.00E-01 |
| ADAL     | -0.0013  | 9.77E-01 | 9.82E-01 |
| ADAM10   | 0.258002 | 2.82E-09 | 1.15E-08 |
| ADAM11   | 0.125925 | 4.21E-03 | 7.65E-03 |
| ADAM12   | 0.414918 | 7.56E-23 | 1.11E-21 |
| ADAM15   | -0.06724 | 1.28E-01 | 1.71E-01 |
| ADAM17   | 0.464517 | 6.32E-29 | 1.51E-27 |
| ADAM18   | 0.082719 | 6.07E-02 | 8.80E-02 |
| ADAM19   | 0.202071 | 3.79E-06 | 1.07E-05 |
| ADAM20   | -0.10178 | 2.09E-02 | 3.33E-02 |
| ADAM21P1 | 0.215628 | 7.82E-07 | 2.40E-06 |
| ADAM21   | 0.249648 | 9.31E-09 | 3.57E-08 |
| ADAM22   | 0.222074 | 3.56E-07 | 1.14E-06 |
| ADAM23   | 0.098686 | 2.51E-02 | 3.94E-02 |
| ADAM28   | -0.01416 | 7.48E-01 | 7.90E-01 |
| ADAM29   | -0.14652 | 8.53E-04 | 1.73E-03 |
| ADAM2    | 0.131142 | 2.87E-03 | 5.35E-03 |
| ADAM30   | -0.01444 | 7.44E-01 | 7.87E-01 |
| ADAM32   | 0.168735 | 1.19E-04 | 2.75E-04 |
| ADAM33   | -0.25402 | 5.01E-09 | 1.98E-08 |
| ADAM3A   | 0.025128 | 5.69E-01 | 6.29E-01 |
| ADAM5P   | 0.095006 | 3.11E-02 | 4.79E-02 |
| ADAM6    | -0.13807 | 1.68E-03 | 3.27E-03 |
| ADAM7    | 0.010694 | 8.09E-01 | 8.42E-01 |



|          |          |          |          |
|----------|----------|----------|----------|
| ADAM8    | -0.03415 | 4.39E-01 | 5.06E-01 |
| ADAM9    | 0.191124 | 1.26E-05 | 3.33E-05 |
| ADAMDEC1 | 0.273808 | 2.62E-10 | 1.20E-09 |
| ADAMTS10 | -0.35032 | 2.57E-16 | 2.14E-15 |
| ADAMTS12 | 0.234888 | 6.92E-08 | 2.40E-07 |
| ADAMTS13 | -0.25199 | 6.69E-09 | 2.61E-08 |
| ADAMTS14 | 0.106882 | 1.52E-02 | 2.50E-02 |
| ADAMTS15 | -0.15442 | 4.37E-04 | 9.25E-04 |
| ADAMTS16 | -0.0032  | 9.42E-01 | 9.55E-01 |
| ADAMTS17 | -0.38304 | 1.92E-19 | 2.14E-18 |
| ADAMTS18 | 0.072657 | 9.96E-02 | 1.37E-01 |
| ADAMTS19 | 0.003232 | 9.42E-01 | 9.54E-01 |
| ADAMTS1  | -0.18221 | 3.18E-05 | 7.95E-05 |
| ADAMTS20 | 0.32199  | 6.90E-14 | 4.54E-13 |
| ADAMTS2  | 0.089014 | 4.35E-02 | 6.49E-02 |
| ADAMTS3  | 0.16171  | 2.29E-04 | 5.07E-04 |
| ADAMTS4  | 0.381504 | 2.75E-19 | 3.01E-18 |
| ADAMTS5  | 0.264771 | 1.04E-09 | 4.43E-09 |
| ADAMTS6  | 0.205678 | 2.52E-06 | 7.26E-06 |
| ADAMTS7  | 0.066601 | 1.31E-01 | 1.76E-01 |
| ADAMTS8  | -0.57082 | 7.35E-46 | 4.45E-44 |
| ADAMTS9  | 0.035274 | 4.24E-01 | 4.90E-01 |
| ADAMTSL1 | -0.03986 | 3.67E-01 | 4.33E-01 |
| ADAMTSL2 | -0.47149 | 7.29E-30 | 1.85E-28 |
| ADAMTSL3 | -0.45248 | 2.34E-27 | 4.98E-26 |
| ADAMTSL4 | -0.0865  | 4.98E-02 | 7.34E-02 |
| ADAMTSL5 | 0.040898 | 3.54E-01 | 4.20E-01 |
| ADAP1    | -0.08989 | 4.14E-02 | 6.22E-02 |
| ADAP2    | 0.041595 | 3.46E-01 | 4.12E-01 |
| ADARB1   | -0.33265 | 9.00E-15 | 6.42E-14 |
| ADARB2   | -0.12771 | 3.69E-03 | 6.78E-03 |
| ADAR     | 0.184763 | 2.45E-05 | 6.23E-05 |
| ADAT1    | 0.088308 | 4.52E-02 | 6.73E-02 |
| ADAT2    | -0.08445 | 5.55E-02 | 8.10E-02 |
| ADAT3    | -0.0099  | 8.23E-01 | 8.54E-01 |
| ADA      | 0.459851 | 2.61E-28 | 5.93E-27 |
| ADCK1    | -0.17369 | 7.43E-05 | 1.76E-04 |
| ADCK2    | 0.132032 | 2.68E-03 | 5.03E-03 |
| ADCK4    | -0.16674 | 1.44E-04 | 3.27E-04 |
| ADCK5    | -0.08468 | 5.48E-02 | 8.01E-02 |
| ADCY10   | -0.01424 | 7.47E-01 | 7.90E-01 |
| ADCY1    | -0.09384 | 3.33E-02 | 5.09E-02 |
| ADCY2    | -0.3823  | 2.28E-19 | 2.52E-18 |
| ADCY3    | 0.316259 | 2.00E-13 | 1.26E-12 |

|           |          |          |          |
|-----------|----------|----------|----------|
| ADCY4     | -0.28719 | 3.09E-11 | 1.55E-10 |
| ADCY5     | -0.09571 | 2.99E-02 | 4.61E-02 |
| ADCY6     | -0.31354 | 3.28E-13 | 2.03E-12 |
| ADCY7     | -0.2597  | 2.20E-09 | 9.05E-09 |
| ADCY8     | -0.09888 | 2.48E-02 | 3.90E-02 |
| ADCY9     | -0.48056 | 4.08E-31 | 1.13E-29 |
| ADCYAP1R1 | -0.15632 | 3.70E-04 | 7.93E-04 |
| ADCYAP1   | -0.12473 | 4.59E-03 | 8.29E-03 |
| ADC       | -0.35911 | 4.03E-17 | 3.65E-16 |
| ADD1      | -0.28435 | 4.92E-11 | 2.40E-10 |
| ADD2      | -0.05349 | 2.26E-01 | 2.83E-01 |
| ADD3      | 0.030787 | 4.86E-01 | 5.51E-01 |
| ADH1A     | -0.5241  | 1.12E-37 | 4.49E-36 |
| ADH1B     | -0.54715 | 1.49E-41 | 7.35E-40 |
| ADH1C     | -0.31014 | 6.05E-13 | 3.63E-12 |
| ADH4      | 0.008104 | 8.54E-01 | 8.81E-01 |
| ADH5      | -0.07727 | 7.98E-02 | 1.13E-01 |
| ADH6      | -0.11923 | 6.75E-03 | 1.18E-02 |
| ADH7      | -0.1803  | 3.86E-05 | 9.53E-05 |
| ADHFE1    | -0.51889 | 7.70E-37 | 2.94E-35 |
| ADI1      | -0.18644 | 2.06E-05 | 5.29E-05 |
| ADIG      | 0.002653 | 9.52E-01 | 9.62E-01 |
| ADIPOQ    | 0.001252 | 9.77E-01 | 9.83E-01 |
| ADIPOR1   | -0.23347 | 8.34E-08 | 2.87E-07 |
| ADIPOR2   | 0.313902 | 3.07E-13 | 1.90E-12 |
| ADK       | -0.03448 | 4.35E-01 | 5.01E-01 |
| ADM2      | -0.01705 | 6.99E-01 | 7.48E-01 |
| ADM       | 0.368568 | 5.14E-18 | 5.00E-17 |
| ADNP2     | 0.237031 | 5.22E-08 | 1.83E-07 |
| ADNP      | 0.200309 | 4.62E-06 | 1.30E-05 |
| ADORA1    | 0.023639 | 5.92E-01 | 6.51E-01 |
| ADORA2A   | -0.14444 | 1.01E-03 | 2.03E-03 |
| ADORA2B   | -0.08082 | 6.69E-02 | 9.62E-02 |
| ADORA3    | -0.09656 | 2.84E-02 | 4.41E-02 |
| ADO       | 0.121483 | 5.77E-03 | 1.03E-02 |
| ADPGK     | 0.063251 | 1.52E-01 | 2.00E-01 |
| ADPRHL1   | -0.15952 | 2.79E-04 | 6.09E-04 |
| ADPRHL2   | -0.0275  | 5.33E-01 | 5.97E-01 |
| ADPRH     | -0.23806 | 4.55E-08 | 1.61E-07 |
| ADRA1A    | -0.40178 | 2.12E-21 | 2.79E-20 |
| ADRA1B    | -0.16628 | 1.50E-04 | 3.41E-04 |
| ADRA1D    | -0.27987 | 1.01E-10 | 4.80E-10 |
| ADRA2A    | -0.38247 | 2.19E-19 | 2.43E-18 |
| ADRA2B    | -0.10888 | 1.34E-02 | 2.23E-02 |

|         |          |          |          |
|---------|----------|----------|----------|
| ADRA2C  | -0.1815  | 3.42E-05 | 8.51E-05 |
| ADRB1   | -0.40852 | 3.91E-22 | 5.45E-21 |
| ADRB2   | -0.36428 | 1.32E-17 | 1.24E-16 |
| ADRB3   | -0.28059 | 9.00E-11 | 4.29E-10 |
| ADRBK1  | 0.119198 | 6.77E-03 | 1.18E-02 |
| ADRBK2  | -0.12727 | 3.82E-03 | 6.98E-03 |
| ADRM1   | 0.259337 | 2.32E-09 | 9.51E-09 |
| ADSL    | 0.342529 | 1.27E-15 | 9.79E-15 |
| ADSSL1  | -0.00874 | 8.43E-01 | 8.72E-01 |
| ADSS    | -0.0031  | 9.44E-01 | 9.56E-01 |
| AEBP1   | -0.1099  | 1.26E-02 | 2.10E-02 |
| AEBP2   | 0.151974 | 5.39E-04 | 1.13E-03 |
| AEN     | 0.15686  | 3.53E-04 | 7.59E-04 |
| AES     | -0.19935 | 5.15E-06 | 1.43E-05 |
| AFAP1L1 | -0.02404 | 5.86E-01 | 6.45E-01 |
| AFAP1L2 | 0.053886 | 2.22E-01 | 2.80E-01 |
| AFAP1   | 0.09375  | 3.34E-02 | 5.11E-02 |
| AFARP1  | 0.143926 | 1.06E-03 | 2.11E-03 |
| AFF1    | -0.15638 | 3.68E-04 | 7.89E-04 |
| AFF2    | -0.21112 | 1.34E-06 | 3.99E-06 |
| AFF3    | -0.49863 | 1.01E-33 | 3.23E-32 |
| AFF4    | -0.13239 | 2.61E-03 | 4.90E-03 |
| AFG3L1  | -0.17234 | 8.46E-05 | 1.99E-04 |
| AFG3L2  | 0.148468 | 7.25E-04 | 1.49E-03 |
| AFMID   | 0.049046 | 2.67E-01 | 3.28E-01 |
| AFM     | 0.073824 | 9.42E-02 | 1.31E-01 |
| AFP     | 0.123013 | 5.18E-03 | 9.28E-03 |
| AFTPH   | -0.05938 | 1.78E-01 | 2.31E-01 |
| AG2     | -0.34646 | 5.70E-16 | 4.59E-15 |
| AGAP11  | -0.40391 | 1.25E-21 | 1.67E-20 |
| AGAP1   | 0.025332 | 5.66E-01 | 6.26E-01 |
| AGAP2   | -0.0806  | 6.76E-02 | 9.72E-02 |
| AGAP3   | -0.27907 | 1.15E-10 | 5.42E-10 |
| AGAP4   | -0.21797 | 5.89E-07 | 1.84E-06 |
| AGAP5   | -0.36107 | 2.65E-17 | 2.44E-16 |
| AGAP6   | -0.1594  | 2.81E-04 | 6.15E-04 |
| AGAP7   | -0.15767 | 3.28E-04 | 7.10E-04 |
| AGAP8   | -0.19662 | 6.95E-06 | 1.90E-05 |
| AGA     | -0.2652  | 9.74E-10 | 4.17E-09 |
| AGBL1   | -0.17635 | 5.73E-05 | 1.38E-04 |
| AGBL2   | -0.19565 | 7.73E-06 | 2.10E-05 |
| AGBL3   | -0.01956 | 6.58E-01 | 7.11E-01 |
| AGBL4   | -0.15078 | 5.97E-04 | 1.24E-03 |
| AGBL5   | 0.184356 | 2.56E-05 | 6.47E-05 |

|         |          |          |          |
|---------|----------|----------|----------|
| AGER    | -0.37833 | 5.71E-19 | 6.04E-18 |
| AGFG1   | 0.365162 | 1.09E-17 | 1.03E-16 |
| AGFG2   | -0.24103 | 3.05E-08 | 1.10E-07 |
| AGGF1   | -0.17602 | 5.91E-05 | 1.42E-04 |
| AGK     | 0.150405 | 6.16E-04 | 1.28E-03 |
| AGL     | -0.01053 | 8.12E-01 | 8.44E-01 |
| AGMAT   | 0.487861 | 3.77E-32 | 1.11E-30 |
| AGPAT1  | -0.01842 | 6.77E-01 | 7.27E-01 |
| AGPAT2  | -0.24563 | 1.63E-08 | 6.05E-08 |
| AGPAT3  | -0.17055 | 1.00E-04 | 2.34E-04 |
| AGPAT4  | -0.09906 | 2.46E-02 | 3.86E-02 |
| AGPAT5  | 0.311637 | 4.62E-13 | 2.81E-12 |
| AGPAT6  | -0.01833 | 6.78E-01 | 7.29E-01 |
| AGPAT9  | 0.055067 | 2.12E-01 | 2.68E-01 |
| AGPHD1  | -0.09091 | 3.92E-02 | 5.91E-02 |
| AGPS    | 0.45377  | 1.60E-27 | 3.44E-26 |
| AGR2    | -0.1645  | 1.77E-04 | 3.98E-04 |
| AGR3    | -0.41376 | 1.02E-22 | 1.49E-21 |
| AGRN    | -0.09434 | 3.23E-02 | 4.96E-02 |
| AGRP    | -0.24445 | 1.92E-08 | 7.07E-08 |
| AGTPBP1 | 0.033814 | 4.44E-01 | 5.10E-01 |
| AGTR1   | -0.26962 | 4.99E-10 | 2.21E-09 |
| AGTR2   | -0.20774 | 1.98E-06 | 5.80E-06 |
| AGTRAP  | -0.02901 | 5.11E-01 | 5.75E-01 |
| AGT     | -0.01849 | 6.76E-01 | 7.26E-01 |
| AGXT2L1 | 0.055876 | 2.06E-01 | 2.61E-01 |
| AGXT2L2 | -0.43486 | 3.58E-25 | 6.40E-24 |
| AGXT2   | -0.15937 | 2.82E-04 | 6.16E-04 |
| AGXT    | 0.141399 | 1.29E-03 | 2.56E-03 |
| AHCTF1  | 0.13608  | 1.97E-03 | 3.77E-03 |
| AHCYL1  | -0.12351 | 5.00E-03 | 8.98E-03 |
| AHCYL2  | -0.42881 | 1.89E-24 | 3.20E-23 |
| AHCY    | 0.387377 | 6.95E-20 | 8.01E-19 |
| AHDC1   | -0.19417 | 9.07E-06 | 2.44E-05 |
| AHI1    | -0.18286 | 2.98E-05 | 7.47E-05 |
| AHNAK2  | 0.139292 | 1.53E-03 | 2.98E-03 |
| AHNAK   | -0.26682 | 7.63E-10 | 3.31E-09 |
| AHRR    | 0.049258 | 2.65E-01 | 3.26E-01 |
| AHR     | -0.10517 | 1.70E-02 | 2.76E-02 |
| AHSA1   | 0.301602 | 2.72E-12 | 1.53E-11 |
| AHSA2   | -0.1983  | 5.78E-06 | 1.60E-05 |
| AHSG    | 0.254794 | 4.49E-09 | 1.78E-08 |
| AHSP    | -0.01763 | 6.90E-01 | 7.39E-01 |
| AICDA   | 0.075446 | 8.72E-02 | 1.22E-01 |

|         |          |          |          |
|---------|----------|----------|----------|
| AIDA    | -0.08056 | 6.77E-02 | 9.73E-02 |
| AIF1L   | -0.07599 | 8.49E-02 | 1.19E-01 |
| AIF1    | -0.05076 | 2.50E-01 | 3.11E-01 |
| AIFM1   | -0.04561 | 3.02E-01 | 3.65E-01 |
| AIFM2   | 0.043988 | 3.19E-01 | 3.84E-01 |
| AIFM3   | 0.04858  | 2.71E-01 | 3.33E-01 |
| AIG1    | 0.15651  | 3.64E-04 | 7.81E-04 |
| AIM1L   | 0.303065 | 2.11E-12 | 1.20E-11 |
| AIM1    | 0.095645 | 3.00E-02 | 4.63E-02 |
| AIM2    | 0.215687 | 7.77E-07 | 2.39E-06 |
| AIMP1   | 0.238169 | 4.48E-08 | 1.59E-07 |
| AIMP2   | 0.427202 | 2.92E-24 | 4.89E-23 |
| AIPL1   | 0.107732 | 1.44E-02 | 2.38E-02 |
| AIP     | -0.03121 | 4.80E-01 | 5.45E-01 |
| AIRE    | -0.11866 | 7.02E-03 | 1.22E-02 |
| AJAP1   | -0.25764 | 2.98E-09 | 1.21E-08 |
| AK1     | -0.50406 | 1.54E-34 | 5.16E-33 |
| AK2     | -0.07955 | 7.13E-02 | 1.02E-01 |
| AK3L1   | 0.529092 | 1.72E-38 | 7.27E-37 |
| AK3     | -0.15924 | 2.85E-04 | 6.23E-04 |
| AK5     | 0.126848 | 3.94E-03 | 7.19E-03 |
| AK7     | -0.16595 | 1.55E-04 | 3.51E-04 |
| AKAP10  | -0.01386 | 7.54E-01 | 7.95E-01 |
| AKAP11  | -0.16557 | 1.60E-04 | 3.63E-04 |
| AKAP12  | 0.174369 | 6.95E-05 | 1.66E-04 |
| AKAP13  | -0.46265 | 1.12E-28 | 2.61E-27 |
| AKAP14  | -0.21042 | 1.45E-06 | 4.31E-06 |
| AKAP1   | -0.3094  | 6.90E-13 | 4.12E-12 |
| AKAP2   | 0.025933 | 5.57E-01 | 6.18E-01 |
| AKAP3   | -0.17177 | 8.94E-05 | 2.10E-04 |
| AKAP4   | -0.02975 | 5.00E-01 | 5.65E-01 |
| AKAP5   | 0.245612 | 1.63E-08 | 6.07E-08 |
| AKAP6   | -0.2376  | 4.83E-08 | 1.70E-07 |
| AKAP7   | -0.19919 | 5.24E-06 | 1.46E-05 |
| AKAP8L  | -0.10871 | 1.36E-02 | 2.25E-02 |
| AKAP8   | -0.18296 | 2.95E-05 | 7.40E-05 |
| AKAP9   | -0.13071 | 2.96E-03 | 5.52E-03 |
| AKD1    | -0.25031 | 8.48E-09 | 3.26E-08 |
| AKIRIN1 | 0.312745 | 3.78E-13 | 2.32E-12 |
| AKIRIN2 | 0.319935 | 1.01E-13 | 6.55E-13 |
| AKNAD1  | 0.106676 | 1.54E-02 | 2.53E-02 |
| AKNA    | -0.26683 | 7.62E-10 | 3.31E-09 |
| AKR1A1  | 0.010814 | 8.07E-01 | 8.40E-01 |
| AKR1B10 | 0.148004 | 7.54E-04 | 1.54E-03 |

|          |          |          |          |
|----------|----------|----------|----------|
| AKR1B15  | 0.236097 | 5.90E-08 | 2.06E-07 |
| AKR1B1   | 0.201692 | 3.96E-06 | 1.12E-05 |
| AKR1C1   | -0.0583  | 1.87E-01 | 2.40E-01 |
| AKR1C2   | 0.016865 | 7.03E-01 | 7.51E-01 |
| AKR1C3   | -0.01354 | 7.59E-01 | 8.00E-01 |
| AKR1C4   | 0.165145 | 1.67E-04 | 3.76E-04 |
| AKR1CL1  | 0.111195 | 1.16E-02 | 1.94E-02 |
| AKR1D1   | 0.126838 | 3.94E-03 | 7.19E-03 |
| AKR1E2   | 0.147208 | 8.06E-04 | 1.64E-03 |
| AKR7A2   | -0.10749 | 1.47E-02 | 2.42E-02 |
| AKR7A3   | 0.043961 | 3.19E-01 | 3.84E-01 |
| AKR7L    | -0.04235 | 3.37E-01 | 4.03E-01 |
| AKT1S1   | 0.110769 | 1.19E-02 | 1.99E-02 |
| AKT1     | -0.11497 | 9.02E-03 | 1.54E-02 |
| AKT2     | 0.164105 | 1.84E-04 | 4.12E-04 |
| AKT3     | 0.062306 | 1.58E-01 | 2.07E-01 |
| AKTIP    | -0.32728 | 2.54E-14 | 1.74E-13 |
| ALAD     | -0.43962 | 9.46E-26 | 1.78E-24 |
| ALAS1    | -0.08995 | 4.13E-02 | 6.20E-02 |
| ALAS2    | -0.08218 | 6.24E-02 | 9.02E-02 |
| ALB      | -0.1127  | 1.05E-02 | 1.77E-02 |
| ALCAM    | -0.28532 | 4.20E-11 | 2.06E-10 |
| ALDH16A1 | -0.14182 | 1.25E-03 | 2.48E-03 |
| ALDH18A1 | 0.172697 | 8.17E-05 | 1.93E-04 |
| ALDH1A1  | -0.14847 | 7.25E-04 | 1.49E-03 |
| ALDH1A2  | -0.04786 | 2.78E-01 | 3.40E-01 |
| ALDH1A3  | 0.047334 | 2.84E-01 | 3.46E-01 |
| ALDH1B1  | 0.339692 | 2.24E-15 | 1.69E-14 |
| ALDH1L1  | -0.03298 | 4.55E-01 | 5.21E-01 |
| ALDH1L2  | 0.212145 | 1.19E-06 | 3.56E-06 |
| ALDH2    | -0.51249 | 7.83E-36 | 2.83E-34 |
| ALDH3A1  | -0.23236 | 9.64E-08 | 3.30E-07 |
| ALDH3A2  | -0.36279 | 1.82E-17 | 1.70E-16 |
| ALDH3B1  | -0.42822 | 2.22E-24 | 3.74E-23 |
| ALDH3B2  | 0.16155  | 2.32E-04 | 5.13E-04 |
| ALDH4A1  | -0.25219 | 6.50E-09 | 2.54E-08 |
| ALDH5A1  | -0.39125 | 2.76E-20 | 3.32E-19 |
| ALDH6A1  | -0.35359 | 1.30E-16 | 1.11E-15 |
| ALDH7A1  | -0.20284 | 3.48E-06 | 9.89E-06 |
| ALDH8A1  | -0.02707 | 5.40E-01 | 6.03E-01 |
| ALDH9A1  | -0.24363 | 2.14E-08 | 7.85E-08 |
| ALDOA    | 0.361437 | 2.45E-17 | 2.26E-16 |
| ALDOB    | -0.25089 | 7.81E-09 | 3.02E-08 |
| ALDOC    | 0.105823 | 1.63E-02 | 2.66E-02 |

|          |          |          |          |
|----------|----------|----------|----------|
| ALG10B   | 0.111443 | 1.14E-02 | 1.91E-02 |
| ALG10    | 0.460165 | 2.37E-28 | 5.41E-27 |
| ALG11    | 0.013107 | 7.67E-01 | 8.06E-01 |
| ALG12    | -0.22895 | 1.50E-07 | 5.02E-07 |
| ALG13    | -0.15297 | 4.95E-04 | 1.04E-03 |
| ALG14    | 0.078137 | 7.65E-02 | 1.09E-01 |
| ALG1L2   | 0.066664 | 1.31E-01 | 1.75E-01 |
| ALG1L    | -0.0035  | 9.37E-01 | 9.50E-01 |
| ALG1     | -0.34902 | 3.37E-16 | 2.77E-15 |
| ALG2     | -0.11202 | 1.10E-02 | 1.85E-02 |
| ALG3     | 0.33346  | 7.69E-15 | 5.51E-14 |
| ALG5     | -0.1695  | 1.11E-04 | 2.57E-04 |
| ALG6     | 0.206593 | 2.27E-06 | 6.57E-06 |
| ALG8     | 0.279729 | 1.03E-10 | 4.90E-10 |
| ALG9     | -0.01588 | 7.19E-01 | 7.66E-01 |
| ALKBH1   | 0.05494  | 2.13E-01 | 2.70E-01 |
| ALKBH2   | 0.331194 | 1.20E-14 | 8.43E-14 |
| ALKBH3   | -0.21978 | 4.72E-07 | 1.49E-06 |
| ALKBH4   | 0.116824 | 7.96E-03 | 1.37E-02 |
| ALKBH5   | -0.11372 | 9.80E-03 | 1.67E-02 |
| ALKBH6   | 0.089666 | 4.20E-02 | 6.29E-02 |
| ALKBH7   | -0.14633 | 8.67E-04 | 1.76E-03 |
| ALKBH8   | -0.04815 | 2.75E-01 | 3.37E-01 |
| ALK      | -0.05133 | 2.45E-01 | 3.05E-01 |
| ALLC     | 0.059523 | 1.77E-01 | 2.30E-01 |
| ALMS1P   | -0.06297 | 1.54E-01 | 2.02E-01 |
| ALMS1    | 0.027395 | 5.35E-01 | 5.98E-01 |
| ALOX12B  | 0.085552 | 5.23E-02 | 7.69E-02 |
| ALOX12P2 | -0.073   | 9.80E-02 | 1.35E-01 |
| ALOX12   | 0.027132 | 5.39E-01 | 6.01E-01 |
| ALOX15B  | -0.45183 | 2.83E-27 | 5.99E-26 |
| ALOX15   | -0.24532 | 1.70E-08 | 6.31E-08 |
| ALOX5AP  | -0.10423 | 1.80E-02 | 2.91E-02 |
| ALOX5    | -0.15601 | 3.80E-04 | 8.13E-04 |
| ALOXE3   | 0.208638 | 1.79E-06 | 5.26E-06 |
| ALPI     | 0.140861 | 1.35E-03 | 2.66E-03 |
| ALPK1    | -0.22093 | 4.10E-07 | 1.31E-06 |
| ALPK2    | 0.244126 | 2.00E-08 | 7.37E-08 |
| ALPK3    | 0.058356 | 1.86E-01 | 2.39E-01 |
| ALPL     | -0.40596 | 7.46E-22 | 1.01E-20 |
| ALPPL2   | -0.29247 | 1.29E-11 | 6.73E-11 |
| ALPP     | -0.25499 | 4.36E-09 | 1.73E-08 |
| ALS2CL   | -0.3238  | 4.91E-14 | 3.28E-13 |
| ALS2CR11 | -0.09354 | 3.38E-02 | 5.17E-02 |

|          |          |          |          |
|----------|----------|----------|----------|
| ALS2CR12 | -0.30517 | 1.46E-12 | 8.45E-12 |
| ALS2CR4  | 0.34782  | 4.32E-16 | 3.51E-15 |
| ALS2CR8  | -0.4469  | 1.19E-26 | 2.37E-25 |
| ALS2     | 0.100501 | 2.26E-02 | 3.57E-02 |
| ALX1     | 0.332017 | 1.02E-14 | 7.23E-14 |
| ALX3     | -0.00039 | 9.93E-01 | 9.95E-01 |
| ALX4     | 0.010702 | 8.09E-01 | 8.42E-01 |
| AMAC1L2  | -0.13915 | 1.55E-03 | 3.01E-03 |
| AMAC1L3  | -0.19361 | 9.65E-06 | 2.59E-05 |
| AMAC1    | 0.032825 | 4.57E-01 | 5.24E-01 |
| AMACR    | -0.05124 | 2.46E-01 | 3.06E-01 |
| AMBN     | 0.101408 | 2.14E-02 | 3.40E-02 |
| AMBP     | -0.21278 | 1.10E-06 | 3.31E-06 |
| AMBRA1   | -0.25239 | 6.33E-09 | 2.47E-08 |
| AMD1     | 0.242315 | 2.56E-08 | 9.32E-08 |
| AMDHD1   | 0.098634 | 2.52E-02 | 3.95E-02 |
| AMDHD2   | -0.00055 | 9.90E-01 | 9.93E-01 |
| AMELX    | -0.06784 | 1.24E-01 | 1.67E-01 |
| AMELY    | 0.040933 | 3.54E-01 | 4.20E-01 |
| AMFR     | 0.214075 | 9.42E-07 | 2.86E-06 |
| AMHR2    | -0.22059 | 4.28E-07 | 1.36E-06 |
| AMH      | 0.08135  | 6.51E-02 | 9.38E-02 |
| AMICA1   | -0.3108  | 5.37E-13 | 3.24E-12 |
| AMIGO1   | -0.39158 | 2.55E-20 | 3.08E-19 |
| AMIGO2   | 0.114275 | 9.44E-03 | 1.61E-02 |
| AMIGO3   | -0.06443 | 1.44E-01 | 1.91E-01 |
| AMMECR1L | 0.060764 | 1.69E-01 | 2.19E-01 |
| AMMECR1  | 0.218199 | 5.73E-07 | 1.79E-06 |
| AMN1     | 0.128975 | 3.37E-03 | 6.22E-03 |
| AMN      | -0.28819 | 2.63E-11 | 1.32E-10 |
| AMOTL1   | -0.13652 | 1.90E-03 | 3.66E-03 |
| AMOTL2   | -0.11337 | 1.00E-02 | 1.70E-02 |
| AMOT     | -0.27251 | 3.20E-10 | 1.45E-09 |
| AMPD1    | -0.3015  | 2.77E-12 | 1.56E-11 |
| AMPD2    | 0.029895 | 4.98E-01 | 5.63E-01 |
| AMPD3    | -0.08027 | 6.87E-02 | 9.86E-02 |
| AMPH     | -0.00892 | 8.40E-01 | 8.69E-01 |
| AMTN     | -0.06961 | 1.15E-01 | 1.56E-01 |
| AMT      | -0.37119 | 2.87E-18 | 2.87E-17 |
| AMY1A    | -0.36481 | 1.18E-17 | 1.11E-16 |
| AMY2A    | -0.36646 | 8.19E-18 | 7.84E-17 |
| AMY2B    | -0.45413 | 1.44E-27 | 3.10E-26 |
| AMZ1     | 0.070072 | 1.12E-01 | 1.53E-01 |
| AMZ2P1   | -0.11353 | 9.93E-03 | 1.69E-02 |



|                 |          |          |          |
|-----------------|----------|----------|----------|
| AMZ2            | 0.218126 | 5.78E-07 | 1.81E-06 |
| ANAPC10         | 0.211638 | 1.26E-06 | 3.77E-06 |
| ANAPC11         | 0.247003 | 1.35E-08 | 5.05E-08 |
| ANAPC13         | 0.014386 | 7.45E-01 | 7.87E-01 |
| ANAPC16         | -0.29567 | 7.54E-12 | 4.02E-11 |
| ANAPC1          | 0.358136 | 4.97E-17 | 4.45E-16 |
| ANAPC2          | -0.15262 | 5.10E-04 | 1.07E-03 |
| ANAPC4          | -0.05043 | 2.53E-01 | 3.14E-01 |
| ANAPC5          | 0.30646  | 1.16E-12 | 6.78E-12 |
| ANAPC7          | 0.465418 | 4.79E-29 | 1.16E-27 |
| ANGEL1          | -0.08297 | 5.99E-02 | 8.70E-02 |
| ANGEL2          | -0.31925 | 1.15E-13 | 7.40E-13 |
| ANGPT1          | -0.39974 | 3.52E-21 | 4.55E-20 |
| ANGPT2          | 0.253126 | 5.69E-09 | 2.24E-08 |
| ANGPT4          | -0.2331  | 8.75E-08 | 3.01E-07 |
| ANGPTL1         | -0.26314 | 1.33E-09 | 5.59E-09 |
| ANGPTL2         | 0.11396  | 9.64E-03 | 1.64E-02 |
| ANGPTL3         | -0.03499 | 4.28E-01 | 4.94E-01 |
| ANGPTL4         | 0.290437 | 1.81E-11 | 9.29E-11 |
| ANGPTL5         | -0.44045 | 7.49E-26 | 1.42E-24 |
| ANGPTL6         | -0.18478 | 2.45E-05 | 6.22E-05 |
| ANGPTL7         | -0.31014 | 6.05E-13 | 3.63E-12 |
| ANG             | -0.29238 | 1.31E-11 | 6.82E-11 |
| ANK1            | -0.02119 | 6.31E-01 | 6.87E-01 |
| ANK2            | -0.15554 | 3.96E-04 | 8.44E-04 |
| ANK3            | -0.25501 | 4.35E-09 | 1.73E-08 |
| ANKAR           | -0.27881 | 1.19E-10 | 5.64E-10 |
| ANKDD1A         | -0.11785 | 7.42E-03 | 1.29E-02 |
| ANKFN1          | -0.46071 | 2.01E-28 | 4.61E-27 |
| ANKFY1          | -0.32276 | 5.97E-14 | 3.96E-13 |
| ANKHD1-EIF4EBP3 | -0.37268 | 2.05E-18 | 2.08E-17 |
| ANKHD1          | -0.27165 | 3.66E-10 | 1.65E-09 |
| ANKH            | -0.07446 | 9.14E-02 | 1.27E-01 |
| ANKIB1          | 0.450025 | 4.80E-27 | 9.88E-26 |
| ANKK1           | -0.31099 | 5.19E-13 | 3.14E-12 |
| ANKLE1          | 0.309867 | 6.35E-13 | 3.81E-12 |
| ANKLE2          | 0.356264 | 7.40E-17 | 6.49E-16 |
| ANKMY1          | -0.41931 | 2.40E-23 | 3.70E-22 |
| ANKMY2          | -0.10048 | 2.26E-02 | 3.58E-02 |
| ANKRA2          | -0.15989 | 2.69E-04 | 5.90E-04 |
| ANKRD10         | -0.30555 | 1.37E-12 | 7.91E-12 |
| ANKRD11         | -0.17673 | 5.51E-05 | 1.33E-04 |
| ANKRD12         | -0.21207 | 1.20E-06 | 3.59E-06 |
| ANKRD13A        | -0.09337 | 3.41E-02 | 5.21E-02 |

|            |          |          |          |
|------------|----------|----------|----------|
| ANKRD13B   | 0.11002  | 1.25E-02 | 2.08E-02 |
| ANKRD13C   | -0.06154 | 1.63E-01 | 2.13E-01 |
| ANKRD13D   | -0.03413 | 4.40E-01 | 5.06E-01 |
| ANKRD16    | -0.05158 | 2.43E-01 | 3.03E-01 |
| ANKRD17    | 0.013572 | 7.59E-01 | 7.99E-01 |
| ANKRD19    | -0.11045 | 1.21E-02 | 2.03E-02 |
| ANKRD1     | 0.044082 | 3.18E-01 | 3.83E-01 |
| ANKRD20A3  | -0.06485 | 1.42E-01 | 1.88E-01 |
| ANKRD20A4  | -0.06966 | 1.14E-01 | 1.55E-01 |
| ANKRD20B   | 0.01804  | 6.83E-01 | 7.33E-01 |
| ANKRD22    | 0.092537 | 3.58E-02 | 5.44E-02 |
| ANKRD23    | -0.08814 | 4.56E-02 | 6.78E-02 |
| ANKRD24    | -0.29357 | 1.07E-11 | 5.64E-11 |
| ANKRD26P1  | 0.08606  | 5.10E-02 | 7.50E-02 |
| ANKRD26    | 0.067594 | 1.26E-01 | 1.69E-01 |
| ANKRD27    | 0.228859 | 1.51E-07 | 5.07E-07 |
| ANKRD28    | -0.02802 | 5.26E-01 | 5.89E-01 |
| ANKRD29    | -0.34999 | 2.76E-16 | 2.28E-15 |
| ANKRD2     | 0.188513 | 1.66E-05 | 4.32E-05 |
| ANKRD30A   | 0.032059 | 4.68E-01 | 5.34E-01 |
| ANKRD30B   | 0.034207 | 4.39E-01 | 5.05E-01 |
| ANKRD31    | 0.076602 | 8.24E-02 | 1.16E-01 |
| ANKRD32    | 0.437793 | 1.58E-25 | 2.91E-24 |
| ANKRD33    | 0.228743 | 1.54E-07 | 5.15E-07 |
| ANKRD34A   | -0.07191 | 1.03E-01 | 1.41E-01 |
| ANKRD34B   | 0.060204 | 1.73E-01 | 2.24E-01 |
| ANKRD34C   | -0.1341  | 2.29E-03 | 4.34E-03 |
| ANKRD35    | -0.18365 | 2.75E-05 | 6.92E-05 |
| ANKRD36BP1 | -0.01954 | 6.58E-01 | 7.11E-01 |
| ANKRD36B   | 0.050939 | 2.49E-01 | 3.09E-01 |
| ANKRD36    | -0.03012 | 4.95E-01 | 5.60E-01 |
| ANKRD37    | -0.05128 | 2.45E-01 | 3.05E-01 |
| ANKRD39    | 0.099951 | 2.33E-02 | 3.68E-02 |
| ANKRD40    | 0.019005 | 6.67E-01 | 7.18E-01 |
| ANKRD42    | -0.26618 | 8.41E-10 | 3.63E-09 |
| ANKRD43    | 0.026064 | 5.55E-01 | 6.16E-01 |
| ANKRD44    | -0.31915 | 1.17E-13 | 7.53E-13 |
| ANKRD45    | -0.25881 | 2.51E-09 | 1.02E-08 |
| ANKRD46    | -0.06543 | 1.38E-01 | 1.84E-01 |
| ANKRD49    | 0.034303 | 4.37E-01 | 5.04E-01 |
| ANKRD50    | -0.17707 | 5.33E-05 | 1.29E-04 |
| ANKRD52    | 0.176318 | 5.74E-05 | 1.39E-04 |
| ANKRD53    | -0.06098 | 1.67E-01 | 2.18E-01 |
| ANKRD54    | -0.12353 | 5.00E-03 | 8.97E-03 |

|         |          |           |           |
|---------|----------|-----------|-----------|
| ANKRD55 | -0.25289 | 5.89E-09  | 2.31E-08  |
| ANKRD56 | -0.01223 | 7.82E-01  | 8.19E-01  |
| ANKRD57 | 0.082494 | 6.14E-02  | 8.89E-02  |
| ANKRD58 | -0.06204 | 1.60E-01  | 2.09E-01  |
| ANKRD5  | 0.040955 | 3.54E-01  | 4.20E-01  |
| ANKRD6  | -0.27674 | 1.66E-10  | 7.72E-10  |
| ANKRD7  | 0.269501 | 5.08E-10  | 2.25E-09  |
| ANKRD9  | -0.06332 | 1.51E-01  | 1.99E-01  |
| ANKS1A  | -0.16815 | 1.26E-04  | 2.90E-04  |
| ANKS1B  | -0.0758  | 8.57E-02  | 1.20E-01  |
| ANKS3   | -0.30726 | 1.01E-12  | 5.93E-12  |
| ANKS4B  | -0.02575 | 5.60E-01  | 6.21E-01  |
| ANKS6   | -0.36521 | 1.08E-17  | 1.02E-16  |
| ANKZF1  | -0.09657 | 2.84E-02  | 4.41E-02  |
| ANLN    | 0.844985 | 1.51E-141 | 6.54E-139 |
| ANO10   | 0.049119 | 2.66E-01  | 3.27E-01  |
| ANO1    | -0.03575 | 4.18E-01  | 4.84E-01  |
| ANO2    | -0.33927 | 2.44E-15  | 1.83E-14  |
| ANO3    | 0.025329 | 5.66E-01  | 6.26E-01  |
| ANO4    | -0.25184 | 6.84E-09  | 2.66E-08  |
| ANO5    | -0.20228 | 3.71E-06  | 1.05E-05  |
| ANO6    | 0.16166  | 2.30E-04  | 5.09E-04  |
| ANO7    | 0.176105 | 5.86E-05  | 1.41E-04  |
| ANO8    | -0.16885 | 1.18E-04  | 2.72E-04  |
| ANO9    | -0.25203 | 6.65E-09  | 2.59E-08  |
| ANP32A  | 0.083543 | 5.81E-02  | 8.46E-02  |
| ANP32B  | 0.313818 | 3.12E-13  | 1.93E-12  |
| ANP32C  | 0.107987 | 1.42E-02  | 2.35E-02  |
| ANP32D  | -0.04819 | 2.75E-01  | 3.37E-01  |
| ANP32E  | 0.383576 | 1.70E-19  | 1.90E-18  |
| ANPEP   | -0.02394 | 5.88E-01  | 6.46E-01  |
| ANTXR1  | -0.03203 | 4.68E-01  | 5.34E-01  |
| ANTXR2  | -0.06111 | 1.66E-01  | 2.16E-01  |
| ANTXRL  | -0.07084 | 1.08E-01  | 1.48E-01  |
| ANUBL1  | -0.1227  | 5.30E-03  | 9.47E-03  |
| ANXA10  | 0.058781 | 1.83E-01  | 2.36E-01  |
| ANXA11  | -0.26776 | 6.63E-10  | 2.90E-09  |
| ANXA13  | 0.139567 | 1.50E-03  | 2.93E-03  |
| ANXA1   | 0.049887 | 2.58E-01  | 3.20E-01  |
| ANXA2P1 | 0.112055 | 1.09E-02  | 1.84E-02  |
| ANXA2P2 | 0.093586 | 3.37E-02  | 5.15E-02  |
| ANXA2P3 | 0.066751 | 1.30E-01  | 1.75E-01  |
| ANXA2   | 0.090394 | 4.03E-02  | 6.07E-02  |
| ANXA3   | -0.06524 | 1.39E-01  | 1.85E-01  |

|         |          |          |          |
|---------|----------|----------|----------|
| ANXA4   | -0.14531 | 9.42E-04 | 1.90E-03 |
| ANXA5   | 0.028185 | 5.23E-01 | 5.87E-01 |
| ANXA6   | -0.15966 | 2.75E-04 | 6.01E-04 |
| ANXA7   | 0.158345 | 3.09E-04 | 6.71E-04 |
| ANXA8L1 | 0.07065  | 1.09E-01 | 1.49E-01 |
| ANXA8L2 | 0.030547 | 4.89E-01 | 5.54E-01 |
| ANXA8   | 0.02982  | 5.00E-01 | 5.64E-01 |
| ANXA9   | -0.10223 | 2.03E-02 | 3.25E-02 |
| AOAH    | 0.002739 | 9.51E-01 | 9.61E-01 |
| AOC2    | 0.167863 | 1.30E-04 | 2.97E-04 |
| AOC3    | -0.45019 | 4.57E-27 | 9.46E-26 |
| AOX1    | -0.12869 | 3.44E-03 | 6.34E-03 |
| AOX2P   | 0.193312 | 9.96E-06 | 2.66E-05 |
| AP1AR   | 0.338747 | 2.71E-15 | 2.03E-14 |
| AP1B1   | -0.00835 | 8.50E-01 | 8.77E-01 |
| AP1G1   | -0.15559 | 3.94E-04 | 8.41E-04 |
| AP1G2   | -0.22316 | 3.11E-07 | 1.01E-06 |
| AP1M1   | -0.11404 | 9.60E-03 | 1.63E-02 |
| AP1M2   | -0.10522 | 1.69E-02 | 2.75E-02 |
| AP1S1   | 0.223126 | 3.12E-07 | 1.01E-06 |
| AP1S2   | -0.03677 | 4.05E-01 | 4.71E-01 |
| AP1S3   | 0.281839 | 7.37E-11 | 3.55E-10 |
| AP2A1   | 0.24163  | 2.81E-08 | 1.02E-07 |
| AP2A2   | -0.41743 | 3.93E-23 | 5.96E-22 |
| AP2B1   | 0.193037 | 1.03E-05 | 2.74E-05 |
| AP2M1   | 0.334721 | 6.01E-15 | 4.36E-14 |
| AP2S1   | 0.409831 | 2.80E-22 | 3.94E-21 |
| AP3B1   | -0.03862 | 3.82E-01 | 4.48E-01 |
| AP3B2   | -0.12235 | 5.43E-03 | 9.69E-03 |
| AP3D1   | 0.053727 | 2.24E-01 | 2.81E-01 |
| AP3M1   | 0.085089 | 5.36E-02 | 7.86E-02 |
| AP3M2   | 0.099427 | 2.40E-02 | 3.79E-02 |
| AP3S1   | 0.228009 | 1.69E-07 | 5.62E-07 |
| AP3S2   | -0.16498 | 1.69E-04 | 3.82E-04 |
| AP4B1   | -0.14142 | 1.29E-03 | 2.55E-03 |
| AP4E1   | 0.066175 | 1.34E-01 | 1.79E-01 |
| AP4M1   | 0.211813 | 1.23E-06 | 3.69E-06 |
| AP4S1   | 0.051824 | 2.40E-01 | 3.00E-01 |
| APAF1   | 0.190859 | 1.30E-05 | 3.41E-05 |
| APBA1   | -0.29451 | 9.16E-12 | 4.85E-11 |
| APBA2   | -0.01543 | 7.27E-01 | 7.72E-01 |
| APBA3   | 0.042819 | 3.32E-01 | 3.98E-01 |
| APBB1IP | -0.0933  | 3.43E-02 | 5.23E-02 |
| APBB1   | -0.33462 | 6.13E-15 | 4.44E-14 |

|          |          |          |          |
|----------|----------|----------|----------|
| APBB2    | -0.11725 | 7.73E-03 | 1.34E-02 |
| APBB3    | -0.27252 | 3.20E-10 | 1.45E-09 |
| APC2     | 0.099303 | 2.42E-02 | 3.81E-02 |
| APCDD1L  | 0.40095  | 2.61E-21 | 3.40E-20 |
| APCDD1   | -0.1868  | 1.99E-05 | 5.11E-05 |
| APCS     | 0.086307 | 5.03E-02 | 7.41E-02 |
| APC      | -0.25674 | 3.39E-09 | 1.36E-08 |
| APEH     | -0.10649 | 1.56E-02 | 2.56E-02 |
| APEX1    | 0.274938 | 2.20E-10 | 1.01E-09 |
| APEX2    | 0.366909 | 7.42E-18 | 7.12E-17 |
| APH1A    | 0.078838 | 7.38E-02 | 1.05E-01 |
| APH1B    | -0.2187  | 5.39E-07 | 1.69E-06 |
| API5     | 0.091933 | 3.70E-02 | 5.61E-02 |
| APIP     | -0.06535 | 1.39E-01 | 1.84E-01 |
| APITD1   | -0.03383 | 4.44E-01 | 5.10E-01 |
| APLF     | 0.070787 | 1.09E-01 | 1.48E-01 |
| APLNR    | -0.13044 | 3.02E-03 | 5.62E-03 |
| APLN     | 0.070145 | 1.12E-01 | 1.52E-01 |
| APLP1    | 0.137927 | 1.70E-03 | 3.30E-03 |
| APLP2    | -0.38351 | 1.72E-19 | 1.93E-18 |
| APOA1BP  | 0.108892 | 1.34E-02 | 2.23E-02 |
| APOA1    | -0.16021 | 2.62E-04 | 5.74E-04 |
| APOA2    | 0.15555  | 3.96E-04 | 8.43E-04 |
| APOA4    | 0.074071 | 9.31E-02 | 1.29E-01 |
| APOA5    | -0.1386  | 1.62E-03 | 3.14E-03 |
| APOB48R  | -0.22734 | 1.84E-07 | 6.09E-07 |
| APOBEC1  | 0.221419 | 3.86E-07 | 1.23E-06 |
| APOBEC2  | -0.18509 | 2.37E-05 | 6.03E-05 |
| APOBEC3A | 0.19497  | 8.32E-06 | 2.25E-05 |
| APOBEC3B | 0.382565 | 2.15E-19 | 2.38E-18 |
| APOBEC3C | -0.0352  | 4.25E-01 | 4.91E-01 |
| APOBEC3D | 0.111181 | 1.16E-02 | 1.94E-02 |
| APOBEC3F | -0.005   | 9.10E-01 | 9.28E-01 |
| APOBEC3G | 0.106894 | 1.52E-02 | 2.50E-02 |
| APOBEC3H | -0.13581 | 2.01E-03 | 3.85E-03 |
| APOBEC4  | -0.29208 | 1.38E-11 | 7.15E-11 |
| APOB     | -0.0482  | 2.75E-01 | 3.37E-01 |
| APOC1P1  | 0.108032 | 1.42E-02 | 2.34E-02 |
| APOC1    | 0.042559 | 3.35E-01 | 4.01E-01 |
| APOC2    | -0.01553 | 7.25E-01 | 7.71E-01 |
| APOC3    | 0.086099 | 5.08E-02 | 7.49E-02 |
| APOC4    | -0.03849 | 3.83E-01 | 4.50E-01 |
| APOD     | -0.37052 | 3.33E-18 | 3.31E-17 |
| APOE     | 0.103592 | 1.87E-02 | 3.01E-02 |

|        |          |          |          |
|--------|----------|----------|----------|
| APOF   | 0.156949 | 3.50E-04 | 7.53E-04 |
| APOH   | -0.26815 | 6.24E-10 | 2.74E-09 |
| APOL1  | 0.1658   | 1.57E-04 | 3.56E-04 |
| APOL2  | 0.192389 | 1.10E-05 | 2.93E-05 |
| APOL3  | -0.0375  | 3.96E-01 | 4.62E-01 |
| APOL4  | 0.073932 | 9.37E-02 | 1.30E-01 |
| APOL5  | 0.065233 | 1.39E-01 | 1.85E-01 |
| APOL6  | 0.152379 | 5.21E-04 | 1.09E-03 |
| APOLD1 | 0.013156 | 7.66E-01 | 8.05E-01 |
| APOM   | -0.21083 | 1.39E-06 | 4.12E-06 |
| APOOL  | 0.110297 | 1.23E-02 | 2.05E-02 |
| APOO   | 0.350556 | 2.45E-16 | 2.04E-15 |
| APPBP2 | -0.00403 | 9.27E-01 | 9.42E-01 |
| APPL1  | -0.01587 | 7.19E-01 | 7.66E-01 |
| APPL2  | 0.105828 | 1.63E-02 | 2.66E-02 |
| APP    | 0.058673 | 1.84E-01 | 2.37E-01 |
| APRT   | -0.00398 | 9.28E-01 | 9.43E-01 |
| APTX   | 0.256338 | 3.59E-09 | 1.44E-08 |
| AQP10  | -0.26986 | 4.81E-10 | 2.14E-09 |
| AQP11  | 0.232633 | 9.30E-08 | 3.19E-07 |
| AQP12A | 0.113511 | 9.94E-03 | 1.69E-02 |
| AQP12B | 0.11564  | 8.62E-03 | 1.48E-02 |
| AQP1   | -0.32152 | 7.53E-14 | 4.94E-13 |
| AQP2   | -0.35284 | 1.52E-16 | 1.29E-15 |
| AQP3   | -0.51847 | 8.99E-37 | 3.42E-35 |
| AQP4   | -0.41256 | 1.39E-22 | 2.01E-21 |
| AQP5   | -0.39109 | 2.87E-20 | 3.44E-19 |
| AQP6   | -0.22676 | 1.98E-07 | 6.54E-07 |
| AQP7P1 | -0.17327 | 7.73E-05 | 1.83E-04 |
| AQP7P3 | -0.01545 | 7.26E-01 | 7.72E-01 |
| AQP7   | -0.49789 | 1.30E-33 | 4.10E-32 |
| AQP8   | -0.10547 | 1.66E-02 | 2.71E-02 |
| AQP9   | 0.209174 | 1.68E-06 | 4.96E-06 |
| AQPEP  | 0.21075  | 1.40E-06 | 4.16E-06 |
| AQR    | 0.146264 | 8.71E-04 | 1.77E-03 |
| ARAF   | -0.26403 | 1.16E-09 | 4.93E-09 |
| ARAP1  | -0.3371  | 3.76E-15 | 2.78E-14 |
| ARAP2  | -0.14336 | 1.10E-03 | 2.20E-03 |
| ARAP3  | -0.21412 | 9.38E-07 | 2.85E-06 |
| ARCN1  | 0.17367  | 7.44E-05 | 1.77E-04 |
| ARC    | -0.32284 | 5.88E-14 | 3.90E-13 |
| AREG   | 0.082699 | 6.07E-02 | 8.81E-02 |
| ARF1   | -0.08628 | 5.04E-02 | 7.42E-02 |
| ARF3   | 0.134528 | 2.22E-03 | 4.21E-03 |

|           |          |           |           |
|-----------|----------|-----------|-----------|
| ARF4      | 0.055885 | 2.05E-01  | 2.61E-01  |
| ARF5      | 0.178801 | 4.49E-05  | 1.10E-04  |
| ARF6      | 0.308634 | 7.92E-13  | 4.70E-12  |
| ARFGAP1   | 0.036394 | 4.10E-01  | 4.76E-01  |
| ARFGAP2   | -0.37636 | 8.95E-19  | 9.31E-18  |
| ARFGAP3   | 0.084746 | 5.46E-02  | 7.99E-02  |
| ARFGEF1   | -0.01968 | 6.56E-01  | 7.09E-01  |
| ARFGEF2   | 0.128616 | 3.46E-03  | 6.37E-03  |
| ARFIP1    | -0.04906 | 2.66E-01  | 3.28E-01  |
| ARFIP2    | -0.05176 | 2.41E-01  | 3.01E-01  |
| ARFRP1    | -0.20617 | 2.38E-06  | 6.88E-06  |
| ARG1      | 0.02273  | 6.07E-01  | 6.64E-01  |
| ARG2      | 0.16041  | 2.57E-04  | 5.65E-04  |
| ARGFXP2   | -0.16692 | 1.42E-04  | 3.23E-04  |
| ARGFX     | 0.042874 | 3.32E-01  | 3.97E-01  |
| ARGLU1    | -0.26254 | 1.45E-09  | 6.08E-09  |
| ARHGAP10  | 0.082177 | 6.24E-02  | 9.03E-02  |
| ARHGAP11A | 0.822675 | 6.50E-128 | 1.73E-125 |
| ARHGAP11B | 0.683858 | 3.01E-72  | 3.25E-70  |
| ARHGAP12  | -0.09925 | 2.43E-02  | 3.82E-02  |
| ARHGAP15  | -0.19006 | 1.41E-05  | 3.69E-05  |
| ARHGAP17  | -0.06963 | 1.15E-01  | 1.55E-01  |
| ARHGAP18  | -0.07683 | 8.15E-02  | 1.15E-01  |
| ARHGAP19  | 0.008486 | 8.48E-01  | 8.75E-01  |
| ARHGAP1   | -0.29834 | 4.78E-12  | 2.62E-11  |
| ARHGAP20  | -0.29596 | 7.17E-12  | 3.84E-11  |
| ARHGAP21  | 0.077894 | 7.74E-02  | 1.10E-01  |
| ARHGAP22  | 0.005412 | 9.02E-01  | 9.21E-01  |
| ARHGAP23  | -0.29664 | 6.38E-12  | 3.44E-11  |
| ARHGAP24  | -0.45087 | 3.74E-27  | 7.82E-26  |
| ARHGAP25  | -0.20759 | 2.02E-06  | 5.90E-06  |
| ARHGAP26  | -0.1217  | 5.68E-03  | 1.01E-02  |
| ARHGAP27  | -0.20766 | 2.00E-06  | 5.85E-06  |
| ARHGAP28  | -0.05889 | 1.82E-01  | 2.35E-01  |
| ARHGAP29  | -0.02747 | 5.34E-01  | 5.97E-01  |
| ARHGAP30  | -0.19798 | 5.99E-06  | 1.65E-05  |
| ARHGAP31  | -0.37466 | 1.32E-18  | 1.35E-17  |
| ARHGAP32  | -0.0439  | 3.20E-01  | 3.85E-01  |
| ARHGAP33  | 0.105424 | 1.67E-02  | 2.72E-02  |
| ARHGAP36  | 0.132013 | 2.68E-03  | 5.03E-03  |
| ARHGAP39  | 0.016388 | 7.11E-01  | 7.58E-01  |
| ARHGAP42  | -0.13968 | 1.48E-03  | 2.90E-03  |
| ARHGAP4   | 0.031574 | 4.75E-01  | 5.40E-01  |
| ARHGAP5   | 0.012281 | 7.81E-01  | 8.18E-01  |

|           |          |          |          |
|-----------|----------|----------|----------|
| ARHGAP6   | -0.46278 | 1.07E-28 | 2.51E-27 |
| ARHGAP8   | -0.24344 | 2.20E-08 | 8.05E-08 |
| ARHGAP9   | -0.10876 | 1.35E-02 | 2.24E-02 |
| ARHGDIA   | 0.076907 | 8.12E-02 | 1.14E-01 |
| ARHGDIB   | -0.37306 | 1.89E-18 | 1.92E-17 |
| ARHGDIG   | -0.03304 | 4.54E-01 | 5.21E-01 |
| ARHGEF10L | -0.12227 | 5.46E-03 | 9.74E-03 |
| ARHGEF10  | -0.20165 | 3.98E-06 | 1.12E-05 |
| ARHGEF11  | -0.22094 | 4.10E-07 | 1.30E-06 |
| ARHGEF12  | -0.34788 | 4.27E-16 | 3.47E-15 |
| ARHGEF15  | -0.41017 | 2.56E-22 | 3.62E-21 |
| ARHGEF16  | -0.02663 | 5.47E-01 | 6.09E-01 |
| ARHGEF17  | -0.52759 | 3.04E-38 | 1.26E-36 |
| ARHGEF18  | -0.05974 | 1.76E-01 | 2.28E-01 |
| ARHGEF19  | -0.28269 | 6.43E-11 | 3.11E-10 |
| ARHGEF1   | -0.3444  | 8.69E-16 | 6.85E-15 |
| ARHGEF2   | -0.42486 | 5.49E-24 | 8.97E-23 |
| ARHGEF33  | -0.01162 | 7.92E-01 | 8.28E-01 |
| ARHGEF35  | 0.025618 | 5.62E-01 | 6.22E-01 |
| ARHGEF37  | -0.34381 | 9.80E-16 | 7.67E-15 |
| ARHGEF38  | -0.20422 | 2.98E-06 | 8.52E-06 |
| ARHGEF3   | -0.17952 | 4.18E-05 | 1.03E-04 |
| ARHGEF4   | 0.205583 | 2.55E-06 | 7.34E-06 |
| ARHGEF5   | -0.02312 | 6.01E-01 | 6.58E-01 |
| ARHGEF6   | -0.22055 | 4.30E-07 | 1.36E-06 |
| ARHGEF7   | -0.17221 | 8.57E-05 | 2.02E-04 |
| ARHGEF9   | -0.39922 | 3.99E-21 | 5.14E-20 |
| ARID1A    | -0.08673 | 4.92E-02 | 7.26E-02 |
| ARID1B    | -0.14368 | 1.08E-03 | 2.15E-03 |
| ARID2     | 0.00955  | 8.29E-01 | 8.59E-01 |
| ARID3A    | 0.285945 | 3.79E-11 | 1.87E-10 |
| ARID3B    | 0.066695 | 1.31E-01 | 1.75E-01 |
| ARID3C    | 0.243955 | 2.05E-08 | 7.54E-08 |
| ARID4A    | -0.38042 | 3.53E-19 | 3.81E-18 |
| ARID4B    | -0.2431  | 2.30E-08 | 8.42E-08 |
| ARID5A    | 0.051896 | 2.40E-01 | 2.99E-01 |
| ARID5B    | -0.29257 | 1.27E-11 | 6.61E-11 |
| ARIH1     | -0.06229 | 1.58E-01 | 2.07E-01 |
| ARIH2     | -0.03637 | 4.10E-01 | 4.76E-01 |
| ARL10     | 0.029602 | 5.03E-01 | 5.67E-01 |
| ARL11     | 0.077479 | 7.90E-02 | 1.12E-01 |
| ARL13A    | -0.08771 | 4.66E-02 | 6.92E-02 |
| ARL13B    | 0.141416 | 1.29E-03 | 2.55E-03 |
| ARL14     | 0.212186 | 1.18E-06 | 3.54E-06 |



|         |          |          |          |
|---------|----------|----------|----------|
| ARL15   | -0.23784 | 4.69E-08 | 1.65E-07 |
| ARL16   | 0.074001 | 9.34E-02 | 1.30E-01 |
| ARL17A  | -0.00897 | 8.39E-01 | 8.68E-01 |
| ARL17B  | -0.11254 | 1.06E-02 | 1.79E-02 |
| ARL1    | 0.109407 | 1.30E-02 | 2.16E-02 |
| ARL2BP  | -0.18837 | 1.69E-05 | 4.38E-05 |
| ARL2    | 0.113418 | 1.00E-02 | 1.70E-02 |
| ARL3    | -0.04842 | 2.73E-01 | 3.35E-01 |
| ARL4A   | 0.248129 | 1.15E-08 | 4.35E-08 |
| ARL4C   | 0.148073 | 7.50E-04 | 1.54E-03 |
| ARL4D   | 0.123599 | 4.97E-03 | 8.94E-03 |
| ARL5A   | 0.192685 | 1.07E-05 | 2.84E-05 |
| ARL5B   | 0.442885 | 3.76E-26 | 7.31E-25 |
| ARL5C   | -0.04842 | 2.73E-01 | 3.35E-01 |
| ARL6IP1 | 0.487053 | 4.92E-32 | 1.43E-30 |
| ARL6IP4 | 0.040861 | 3.55E-01 | 4.21E-01 |
| ARL6IP5 | -0.10294 | 1.95E-02 | 3.12E-02 |
| ARL6IP6 | 0.508648 | 3.08E-35 | 1.07E-33 |
| ARL6    | 0.088014 | 4.59E-02 | 6.82E-02 |
| ARL8A   | -0.26177 | 1.62E-09 | 6.77E-09 |
| ARL8B   | -0.0893  | 4.28E-02 | 6.40E-02 |
| ARL9    | 0.302409 | 2.37E-12 | 1.34E-11 |
| ARMC10  | 0.199592 | 5.01E-06 | 1.40E-05 |
| ARMC1   | 0.360781 | 2.82E-17 | 2.59E-16 |
| ARMC2   | -0.22403 | 2.79E-07 | 9.07E-07 |
| ARMC3   | -0.0878  | 4.64E-02 | 6.89E-02 |
| ARMC4   | -0.12409 | 4.80E-03 | 8.65E-03 |
| ARMC5   | -0.33102 | 1.24E-14 | 8.69E-14 |
| ARMC6   | 0.087639 | 4.68E-02 | 6.94E-02 |
| ARMC7   | -0.1689  | 1.17E-04 | 2.71E-04 |
| ARMC8   | 0.29279  | 1.22E-11 | 6.38E-11 |
| ARMC9   | -0.17929 | 4.27E-05 | 1.05E-04 |
| ARMCX1  | -0.09749 | 2.69E-02 | 4.20E-02 |
| ARMCX2  | -0.13088 | 2.92E-03 | 5.45E-03 |
| ARMCX3  | -0.15873 | 2.99E-04 | 6.50E-04 |
| ARMCX5  | -0.14138 | 1.30E-03 | 2.56E-03 |
| ARMCX6  | -0.09582 | 2.97E-02 | 4.59E-02 |
| ARMS2   | -0.06749 | 1.26E-01 | 1.70E-01 |
| ARNT2   | -0.14802 | 7.53E-04 | 1.54E-03 |
| ARNTL2  | 0.562056 | 3.18E-44 | 1.79E-42 |
| ARNTL   | -0.19175 | 1.18E-05 | 3.12E-05 |
| ARNT    | -0.20382 | 3.11E-06 | 8.90E-06 |
| ARPC1A  | 0.403803 | 1.28E-21 | 1.71E-20 |
| ARPC1B  | 0.14691  | 8.26E-04 | 1.68E-03 |

|          |          |          |          |
|----------|----------|----------|----------|
| ARPC2    | 0.262947 | 1.36E-09 | 5.74E-09 |
| ARPC3    | 0.353847 | 1.23E-16 | 1.06E-15 |
| ARPC4    | 0.120529 | 6.17E-03 | 1.09E-02 |
| ARPC5L   | 0.129684 | 3.20E-03 | 5.92E-03 |
| ARPC5    | 0.178454 | 4.65E-05 | 1.14E-04 |
| ARPM1    | -0.0123  | 7.81E-01 | 8.18E-01 |
| ARPP19   | 0.17176  | 8.95E-05 | 2.10E-04 |
| ARPP21   | 0.002749 | 9.50E-01 | 9.61E-01 |
| ARR3     | 0.047236 | 2.85E-01 | 3.47E-01 |
| ARRB1    | -0.39882 | 4.40E-21 | 5.66E-20 |
| ARRB2    | -0.22834 | 1.62E-07 | 5.39E-07 |
| ARRDC1   | -0.20803 | 1.92E-06 | 5.63E-06 |
| ARRDC2   | -0.30461 | 1.61E-12 | 9.28E-12 |
| ARRDC3   | -0.28614 | 3.68E-11 | 1.82E-10 |
| ARRDC4   | -0.22376 | 2.88E-07 | 9.36E-07 |
| ARRDC5   | -0.07193 | 1.03E-01 | 1.41E-01 |
| ARSA     | -0.24134 | 2.93E-08 | 1.06E-07 |
| ARSB     | 0.085904 | 5.14E-02 | 7.56E-02 |
| ARSD     | -0.35043 | 2.52E-16 | 2.09E-15 |
| ARSE     | -0.21935 | 4.98E-07 | 1.57E-06 |
| ARSF     | -0.07358 | 9.53E-02 | 1.32E-01 |
| ARSG     | -0.10334 | 1.90E-02 | 3.06E-02 |
| ARSH     | 0.120815 | 6.05E-03 | 1.07E-02 |
| ARSI     | 0.101588 | 2.11E-02 | 3.36E-02 |
| ARSJ     | 0.097458 | 2.70E-02 | 4.21E-02 |
| ARSK     | -0.03285 | 4.57E-01 | 5.23E-01 |
| ART1     | -0.08914 | 4.32E-02 | 6.45E-02 |
| ART3     | 0.132657 | 2.56E-03 | 4.81E-03 |
| ART4     | -0.3996  | 3.64E-21 | 4.69E-20 |
| ART5     | -0.07817 | 7.63E-02 | 1.08E-01 |
| ARTN     | 0.309244 | 7.10E-13 | 4.24E-12 |
| ARV1     | -0.29502 | 8.41E-12 | 4.47E-11 |
| ARVCF    | -0.27472 | 2.27E-10 | 1.05E-09 |
| ARX      | -0.18087 | 3.65E-05 | 9.04E-05 |
| AR       | -0.35818 | 4.92E-17 | 4.41E-16 |
| AS3MT    | 0.03718  | 4.00E-01 | 4.66E-01 |
| ASAH1    | -0.39712 | 6.68E-21 | 8.42E-20 |
| ASAH2B   | 0.135825 | 2.01E-03 | 3.85E-03 |
| ASAH2    | 0.113693 | 9.82E-03 | 1.67E-02 |
| ASAM     | 0.19157  | 1.20E-05 | 3.18E-05 |
| ASAP1IT1 | 0.002634 | 9.52E-01 | 9.62E-01 |
| ASAP1    | 0.364478 | 1.26E-17 | 1.19E-16 |
| ASAP2    | 0.116333 | 8.23E-03 | 1.42E-02 |
| ASAP3    | -0.38762 | 6.55E-20 | 7.58E-19 |

|        |          |           |           |
|--------|----------|-----------|-----------|
| ASB10  | 0.161263 | 2.38E-04  | 5.26E-04  |
| ASB11  | -0.07981 | 7.03E-02  | 1.01E-01  |
| ASB12  | -0.19826 | 5.81E-06  | 1.60E-05  |
| ASB13  | -0.01556 | 7.25E-01  | 7.70E-01  |
| ASB14  | -0.23554 | 6.35E-08  | 2.21E-07  |
| ASB15  | 0.050052 | 2.57E-01  | 3.18E-01  |
| ASB16  | -0.20548 | 2.58E-06  | 7.42E-06  |
| ASB17  | 0.02217  | 6.16E-01  | 6.72E-01  |
| ASB18  | 0.063078 | 1.53E-01  | 2.01E-01  |
| ASB1   | 0.09706  | 2.76E-02  | 4.29E-02  |
| ASB2   | -0.06146 | 1.64E-01  | 2.14E-01  |
| ASB3   | -0.07849 | 7.51E-02  | 1.07E-01  |
| ASB4   | -0.11761 | 7.55E-03  | 1.31E-02  |
| ASB5   | -0.04508 | 3.07E-01  | 3.71E-01  |
| ASB6   | -0.05062 | 2.51E-01  | 3.12E-01  |
| ASB7   | 0.092598 | 3.57E-02  | 5.42E-02  |
| ASB8   | -0.04929 | 2.64E-01  | 3.26E-01  |
| ASB9   | -0.05836 | 1.86E-01  | 2.39E-01  |
| ASCC1  | 0.166938 | 1.41E-04  | 3.22E-04  |
| ASCC2  | -0.01776 | 6.88E-01  | 7.37E-01  |
| ASCC3  | 0.23885  | 4.09E-08  | 1.45E-07  |
| ASCL1  | 0.026364 | 5.51E-01  | 6.12E-01  |
| ASCL2  | 0.044446 | 3.14E-01  | 3.79E-01  |
| ASCL3  | -0.16763 | 1.32E-04  | 3.03E-04  |
| ASCL4  | -0.26464 | 1.06E-09  | 4.52E-09  |
| ASF1A  | 0.084889 | 5.42E-02  | 7.94E-02  |
| ASF1B  | 0.836786 | 2.67E-136 | 8.91E-134 |
| ASFMR1 | -0.00625 | 8.88E-01  | 9.09E-01  |
| ASGR1  | 0.027185 | 5.38E-01  | 6.01E-01  |
| ASGR2  | 0.131202 | 2.85E-03  | 5.33E-03  |
| ASH1L  | -0.24251 | 2.50E-08  | 9.09E-08  |
| ASH2L  | 0.104927 | 1.72E-02  | 2.79E-02  |
| ASIP   | 0.041564 | 3.47E-01  | 4.12E-01  |
| ASL    | -0.07386 | 9.40E-02  | 1.30E-01  |
| ASMTL  | -0.31777 | 1.51E-13  | 9.63E-13  |
| ASMT   | 0.083436 | 5.85E-02  | 8.50E-02  |
| ASNA1  | 0.145466 | 9.30E-04  | 1.88E-03  |
| ASNSD1 | 0.169286 | 1.13E-04  | 2.62E-04  |
| ASNS   | 0.454802 | 1.18E-27  | 2.56E-26  |
| ASPA   | -0.40727 | 5.36E-22  | 7.37E-21  |
| ASPDH  | -0.08974 | 4.18E-02  | 6.26E-02  |
| ASPG   | -0.31238 | 4.04E-13  | 2.47E-12  |
| ASPHD1 | 0.019544 | 6.58E-01  | 7.11E-01  |
| ASPHD2 | 0.158486 | 3.05E-04  | 6.63E-04  |

|         |          |           |           |
|---------|----------|-----------|-----------|
| ASPH    | 0.243392 | 2.21E-08  | 8.11E-08  |
| ASPM    | 0.811481 | 8.94E-122 | 2.21E-119 |
| ASPN    | -0.07094 | 1.08E-01  | 1.47E-01  |
| ASPRV1  | -0.25464 | 4.59E-09  | 1.82E-08  |
| ASPSCR1 | -0.086   | 5.11E-02  | 7.52E-02  |
| ASRGL1  | 0.092406 | 3.60E-02  | 5.47E-02  |
| ASS1    | -0.14799 | 7.55E-04  | 1.55E-03  |
| ASTE1   | -0.0219  | 6.20E-01  | 6.76E-01  |
| ASTL    | -0.0501  | 2.56E-01  | 3.17E-01  |
| ASTN1   | -0.10706 | 1.51E-02  | 2.48E-02  |
| ASTN2   | -0.18153 | 3.41E-05  | 8.48E-05  |
| ASXL1   | 0.037522 | 3.95E-01  | 4.62E-01  |
| ASXL2   | 0.148247 | 7.39E-04  | 1.51E-03  |
| ASXL3   | -0.03158 | 4.75E-01  | 5.40E-01  |
| ASZ1    | -0.07517 | 8.84E-02  | 1.23E-01  |
| ATAD1   | 0.079943 | 6.99E-02  | 1.00E-01  |
| ATAD2B  | 0.037253 | 3.99E-01  | 4.65E-01  |
| ATAD2   | 0.703589 | 3.84E-78  | 4.60E-76  |
| ATAD3A  | 0.273233 | 2.86E-10  | 1.31E-09  |
| ATAD3B  | 0.134312 | 2.25E-03  | 4.28E-03  |
| ATAD3C  | -0.35211 | 1.77E-16  | 1.50E-15  |
| ATAD5   | 0.644877 | 7.02E-62  | 6.38E-60  |
| ATCAY   | 0.082934 | 6.00E-02  | 8.71E-02  |
| ATE1    | 0.119487 | 6.63E-03  | 1.16E-02  |
| ATF1    | 0.209479 | 1.62E-06  | 4.79E-06  |
| ATF2    | 0.196502 | 7.04E-06  | 1.92E-05  |
| ATF3    | 0.015172 | 7.31E-01  | 7.76E-01  |
| ATF4    | 0.108988 | 1.33E-02  | 2.21E-02  |
| ATF5    | 0.257257 | 3.14E-09  | 1.27E-08  |
| ATF6B   | -0.14162 | 1.27E-03  | 2.51E-03  |
| ATF6    | -0.03623 | 4.12E-01  | 4.78E-01  |
| ATF7IP2 | -0.35008 | 2.70E-16  | 2.24E-15  |
| ATF7IP  | 0.163275 | 1.98E-04  | 4.43E-04  |
| ATF7    | -0.34545 | 7.02E-16  | 5.59E-15  |
| ATG10   | 0.062577 | 1.56E-01  | 2.05E-01  |
| ATG12   | 0.1947   | 8.57E-06  | 2.32E-05  |
| ATG16L1 | 0.228489 | 1.59E-07  | 5.30E-07  |
| ATG16L2 | -0.29936 | 4.01E-12  | 2.21E-11  |
| ATG2A   | -0.14839 | 7.30E-04  | 1.50E-03  |
| ATG2B   | -0.26809 | 6.30E-10  | 2.76E-09  |
| ATG3    | 0.294009 | 9.97E-12  | 5.26E-11  |
| ATG4A   | 0.131842 | 2.72E-03  | 5.09E-03  |
| ATG4B   | -0.04784 | 2.79E-01  | 3.40E-01  |
| ATG4C   | 0.159117 | 2.89E-04  | 6.29E-04  |

|         |          |          |          |
|---------|----------|----------|----------|
| ATG4D   | 0.046385 | 2.93E-01 | 3.56E-01 |
| ATG5    | 0.25039  | 8.39E-09 | 3.23E-08 |
| ATG7    | 0.067538 | 1.26E-01 | 1.69E-01 |
| ATG9A   | 0.002755 | 9.50E-01 | 9.61E-01 |
| ATG9B   | 0.086564 | 4.96E-02 | 7.32E-02 |
| ATHL1   | -0.20656 | 2.28E-06 | 6.60E-06 |
| ATIC    | 0.400356 | 3.02E-21 | 3.93E-20 |
| ATL1    | 0.053588 | 2.25E-01 | 2.83E-01 |
| ATL2    | -0.06569 | 1.37E-01 | 1.82E-01 |
| ATL3    | 0.397752 | 5.73E-21 | 7.27E-20 |
| ATMIN   | 0.064823 | 1.42E-01 | 1.88E-01 |
| ATM     | -0.14677 | 8.36E-04 | 1.70E-03 |
| ATN1    | -0.12319 | 5.12E-03 | 9.17E-03 |
| ATOH1   | 0.011006 | 8.03E-01 | 8.38E-01 |
| ATOH7   | 0.271078 | 3.99E-10 | 1.79E-09 |
| ATOH8   | -0.5038  | 1.69E-34 | 5.64E-33 |
| ATOX1   | 0.176323 | 5.74E-05 | 1.39E-04 |
| ATP10A  | -0.19983 | 4.87E-06 | 1.36E-05 |
| ATP10B  | -0.0929  | 3.51E-02 | 5.34E-02 |
| ATP10D  | 0.036453 | 4.09E-01 | 4.76E-01 |
| ATP11A  | -0.40224 | 1.89E-21 | 2.50E-20 |
| ATP11B  | 0.225969 | 2.19E-07 | 7.19E-07 |
| ATP11C  | 0.168117 | 1.26E-04 | 2.91E-04 |
| ATP12A  | -0.05812 | 1.88E-01 | 2.41E-01 |
| ATP13A1 | -0.13425 | 2.26E-03 | 4.29E-03 |
| ATP13A2 | -0.10191 | 2.07E-02 | 3.31E-02 |
| ATP13A3 | 0.468401 | 1.91E-29 | 4.74E-28 |
| ATP13A4 | -0.46751 | 2.51E-29 | 6.17E-28 |
| ATP13A5 | -0.17933 | 4.26E-05 | 1.05E-04 |
| ATP1A1  | -0.39451 | 1.26E-20 | 1.56E-19 |
| ATP1A2  | -0.57433 | 1.58E-46 | 9.78E-45 |
| ATP1A3  | 0.139185 | 1.54E-03 | 3.01E-03 |
| ATP1A4  | -0.18766 | 1.81E-05 | 4.70E-05 |
| ATP1B1  | -0.31287 | 3.70E-13 | 2.27E-12 |
| ATP1B2  | -0.53911 | 3.63E-40 | 1.71E-38 |
| ATP1B3  | 0.462336 | 1.23E-28 | 2.86E-27 |
| ATP1B4  | -0.02731 | 5.36E-01 | 5.99E-01 |
| ATP2A1  | 0.238168 | 4.48E-08 | 1.59E-07 |
| ATP2A2  | 0.23825  | 4.43E-08 | 1.57E-07 |
| ATP2A3  | 0.019698 | 6.56E-01 | 7.09E-01 |
| ATP2B1  | 0.291746 | 1.46E-11 | 7.54E-11 |
| ATP2B2  | -0.07068 | 1.09E-01 | 1.49E-01 |
| ATP2B3  | -0.09243 | 3.60E-02 | 5.47E-02 |
| ATP2B4  | -0.23473 | 7.06E-08 | 2.45E-07 |

|          |          |          |          |
|----------|----------|----------|----------|
| ATP2C1   | 0.299139 | 4.17E-12 | 2.30E-11 |
| ATP2C2   | -0.31051 | 5.66E-13 | 3.41E-12 |
| ATP4A    | 0.128893 | 3.39E-03 | 6.25E-03 |
| ATP4B    | -0.22837 | 1.61E-07 | 5.37E-07 |
| ATP5A1   | -0.00941 | 8.31E-01 | 8.61E-01 |
| ATP5B    | 0.438231 | 1.40E-25 | 2.59E-24 |
| ATP5C1   | 0.278094 | 1.34E-10 | 6.29E-10 |
| ATP5D    | 0.048388 | 2.73E-01 | 3.35E-01 |
| ATP5EP2  | 0.034665 | 4.32E-01 | 4.99E-01 |
| ATP5E    | 0.084731 | 5.47E-02 | 7.99E-02 |
| ATP5F1   | 0.193362 | 9.91E-06 | 2.65E-05 |
| ATP5G1   | 0.216683 | 6.89E-07 | 2.13E-06 |
| ATP5G2   | 0.068734 | 1.19E-01 | 1.61E-01 |
| ATP5G3   | 0.411281 | 1.93E-22 | 2.75E-21 |
| ATP5H    | 0.257392 | 3.08E-09 | 1.25E-08 |
| ATP5I    | 0.131404 | 2.81E-03 | 5.25E-03 |
| ATP5J2   | 0.296124 | 6.97E-12 | 3.74E-11 |
| ATP5J    | 0.146652 | 8.44E-04 | 1.71E-03 |
| ATP5L2   | 0.054592 | 2.16E-01 | 2.73E-01 |
| ATP5L    | 0.118634 | 7.03E-03 | 1.23E-02 |
| ATP5O    | 0.102612 | 1.99E-02 | 3.18E-02 |
| ATP5SL   | 0.059301 | 1.79E-01 | 2.31E-01 |
| ATP5S    | 0.048703 | 2.70E-01 | 3.32E-01 |
| ATP6AP1L | -0.1132  | 1.01E-02 | 1.72E-02 |
| ATP6AP1  | -0.11214 | 1.09E-02 | 1.83E-02 |
| ATP6AP2  | 0.095287 | 3.06E-02 | 4.72E-02 |
| ATP6V0A1 | -0.36458 | 1.24E-17 | 1.17E-16 |
| ATP6V0A2 | 0.227331 | 1.84E-07 | 6.10E-07 |
| ATP6V0A4 | -0.02925 | 5.08E-01 | 5.72E-01 |
| ATP6V0B  | 0.116106 | 8.35E-03 | 1.44E-02 |
| ATP6V0C  | -0.09049 | 4.01E-02 | 6.03E-02 |
| ATP6V0D1 | -0.2406  | 3.24E-08 | 1.16E-07 |
| ATP6V0D2 | -0.16332 | 1.97E-04 | 4.41E-04 |
| ATP6V0E1 | -0.17306 | 7.89E-05 | 1.87E-04 |
| ATP6V0E2 | 0.037413 | 3.97E-01 | 4.63E-01 |
| ATP6V1A  | 0.163798 | 1.89E-04 | 4.23E-04 |
| ATP6V1B1 | -0.15639 | 3.68E-04 | 7.88E-04 |
| ATP6V1B2 | -0.02466 | 5.77E-01 | 6.36E-01 |
| ATP6V1C1 | 0.167522 | 1.34E-04 | 3.06E-04 |
| ATP6V1C2 | -0.02618 | 5.53E-01 | 6.15E-01 |
| ATP6V1D  | 0.116872 | 7.93E-03 | 1.37E-02 |
| ATP6V1E1 | 0.071368 | 1.06E-01 | 1.45E-01 |
| ATP6V1E2 | 0.152769 | 5.03E-04 | 1.06E-03 |
| ATP6V1F  | 0.272586 | 3.17E-10 | 1.44E-09 |

|          |          |           |           |
|----------|----------|-----------|-----------|
| ATP6V1G1 | 0.040003 | 3.65E-01  | 4.31E-01  |
| ATP6V1G2 | 0.004792 | 9.14E-01  | 9.31E-01  |
| ATP6V1G3 | -0.12313 | 5.14E-03  | 9.21E-03  |
| ATP6V1H  | -0.02295 | 6.03E-01  | 6.60E-01  |
| ATP7A    | -0.21548 | 7.97E-07  | 2.44E-06  |
| ATP7B    | 0.017567 | 6.91E-01  | 7.40E-01  |
| ATP8A1   | -0.50496 | 1.13E-34  | 3.79E-33  |
| ATP8A2   | -0.19221 | 1.12E-05  | 2.98E-05  |
| ATP8B1   | -0.07476 | 9.01E-02  | 1.26E-01  |
| ATP8B2   | -0.17279 | 8.10E-05  | 1.91E-04  |
| ATP8B3   | 0.276702 | 1.67E-10  | 7.76E-10  |
| ATP8B4   | -0.12314 | 5.14E-03  | 9.20E-03  |
| ATP8B5P  | -0.27852 | 1.25E-10  | 5.89E-10  |
| ATP9A    | -0.25231 | 6.39E-09  | 2.50E-08  |
| ATP9B    | -0.37254 | 2.12E-18  | 2.14E-17  |
| ATPAF1   | -0.22714 | 1.89E-07  | 6.25E-07  |
| ATPAF2   | -0.09329 | 3.43E-02  | 5.23E-02  |
| ATPBD4   | 0.177703 | 5.01E-05  | 1.22E-04  |
| ATPIF1   | -0.20861 | 1.80E-06  | 5.28E-06  |
| ATRIP    | 0.061804 | 1.61E-01  | 2.11E-01  |
| ATRNL1   | -0.13076 | 2.95E-03  | 5.50E-03  |
| ATRNL    | -0.2105  | 1.44E-06  | 4.27E-06  |
| ATRX     | -0.22608 | 2.16E-07  | 7.10E-07  |
| ATR      | 0.19799  | 5.98E-06  | 1.65E-05  |
| ATXN10   | -0.05921 | 1.80E-01  | 2.32E-01  |
| ATXN1L   | -0.27269 | 3.12E-10  | 1.42E-09  |
| ATXN1    | -0.14829 | 7.36E-04  | 1.51E-03  |
| ATXN2L   | 0.160997 | 2.44E-04  | 5.38E-04  |
| ATXN2    | -0.03902 | 3.77E-01  | 4.43E-01  |
| ATXN3L   | 0.069559 | 1.15E-01  | 1.56E-01  |
| ATXN3    | -0.1261  | 4.15E-03  | 7.56E-03  |
| ATXN7L1  | -0.19464 | 8.63E-06  | 2.33E-05  |
| ATXN7L2  | -0.00108 | 9.81E-01  | 9.85E-01  |
| ATXN7L3B | 0.168974 | 1.17E-04  | 2.69E-04  |
| ATXN7L3  | 0.251209 | 7.47E-09  | 2.89E-08  |
| ATXN7    | -0.31652 | 1.90E-13  | 1.20E-12  |
| ATXN8OS  | 0.045266 | 3.05E-01  | 3.69E-01  |
| AUH      | -0.25791 | 2.86E-09  | 1.16E-08  |
| AUP1     | 0.195295 | 8.04E-06  | 2.18E-05  |
| AURKAIP1 | 0.144421 | 1.01E-03  | 2.03E-03  |
| AURKAPS1 | 0.347658 | 4.46E-16  | 3.62E-15  |
| AURKA    | 0.787101 | 1.01E-109 | 1.95E-107 |
| AURKB    | 0.826124 | 6.82E-130 | 1.92E-127 |
| AURKC    | 0.123529 | 5.00E-03  | 8.97E-03  |

|          |          |          |          |
|----------|----------|----------|----------|
| AUTS2    | -0.41051 | 2.35E-22 | 3.33E-21 |
| AVEN     | 0.318936 | 1.22E-13 | 7.82E-13 |
| AVIL     | -0.07252 | 1.00E-01 | 1.38E-01 |
| AVL9     | 0.482841 | 1.95E-31 | 5.49E-30 |
| AVPI1    | -0.21409 | 9.41E-07 | 2.86E-06 |
| AVPR1A   | 0.198856 | 5.43E-06 | 1.51E-05 |
| AVPR1B   | -0.04802 | 2.77E-01 | 3.39E-01 |
| AVPR2    | -0.20595 | 2.44E-06 | 7.05E-06 |
| AVP      | 0.063116 | 1.53E-01 | 2.01E-01 |
| AWAT1    | 0.215583 | 7.87E-07 | 2.42E-06 |
| AWAT2    | 0.058092 | 1.88E-01 | 2.42E-01 |
| AXIN1    | -0.08503 | 5.38E-02 | 7.88E-02 |
| AXIN2    | -0.45498 | 1.12E-27 | 2.44E-26 |
| AXL      | -0.05414 | 2.20E-01 | 2.77E-01 |
| AZGP1    | -0.12933 | 3.28E-03 | 6.07E-03 |
| AZI1     | 0.089417 | 4.25E-02 | 6.36E-02 |
| AZI2     | -0.01587 | 7.19E-01 | 7.66E-01 |
| AZIN1    | 0.28264  | 6.48E-11 | 3.14E-10 |
| AZU1     | -0.34914 | 3.29E-16 | 2.70E-15 |
| B2M      | 0.022761 | 6.06E-01 | 6.63E-01 |
| B3GALNT1 | 0.358052 | 5.06E-17 | 4.53E-16 |
| B3GALNT2 | 0.115316 | 8.81E-03 | 1.51E-02 |
| B3GALT1  | 0.067653 | 1.25E-01 | 1.68E-01 |
| B3GALT2  | -0.43127 | 9.65E-25 | 1.67E-23 |
| B3GALT4  | -0.25107 | 7.62E-09 | 2.95E-08 |
| B3GALT5  | 0.079211 | 7.25E-02 | 1.03E-01 |
| B3GALT6  | -0.05128 | 2.45E-01 | 3.05E-01 |
| B3GALTL  | -0.10025 | 2.29E-02 | 3.62E-02 |
| B3GAT1   | -0.2462  | 1.51E-08 | 5.62E-08 |
| B3GAT2   | -0.15562 | 3.93E-04 | 8.39E-04 |
| B3GAT3   | 0.07695  | 8.11E-02 | 1.14E-01 |
| B3GNT1   | -0.32539 | 3.63E-14 | 2.45E-13 |
| B3GNT2   | 0.203791 | 3.12E-06 | 8.93E-06 |
| B3GNT3   | 0.162458 | 2.14E-04 | 4.75E-04 |
| B3GNT4   | 0.316252 | 2.00E-13 | 1.26E-12 |
| B3GNT5   | 0.528093 | 2.51E-38 | 1.05E-36 |
| B3GNT6   | -0.09194 | 3.70E-02 | 5.61E-02 |
| B3GNT7   | -0.14186 | 1.25E-03 | 2.47E-03 |
| B3GNT8   | -0.49584 | 2.60E-33 | 8.14E-32 |
| B3GNT9   | -0.33349 | 7.64E-15 | 5.48E-14 |
| B3GNTL1  | 0.002638 | 9.52E-01 | 9.62E-01 |
| B4GALNT1 | 0.31604  | 2.08E-13 | 1.30E-12 |
| B4GALNT2 | 0.083728 | 5.76E-02 | 8.39E-02 |
| B4GALNT3 | -0.26422 | 1.13E-09 | 4.80E-09 |



|          |          |          |          |
|----------|----------|----------|----------|
| B4GALNT4 | 0.18222  | 3.18E-05 | 7.94E-05 |
| B4GALT1  | 0.264018 | 1.16E-09 | 4.94E-09 |
| B4GALT2  | 0.202667 | 3.55E-06 | 1.01E-05 |
| B4GALT3  | 0.140791 | 1.36E-03 | 2.67E-03 |
| B4GALT4  | 0.296917 | 6.09E-12 | 3.29E-11 |
| B4GALT5  | 0.296597 | 6.44E-12 | 3.47E-11 |
| B4GALT6  | 0.318245 | 1.38E-13 | 8.85E-13 |
| B4GALT7  | -0.09988 | 2.34E-02 | 3.70E-02 |
| B9D1     | -0.08587 | 5.15E-02 | 7.57E-02 |
| B9D2     | -0.28846 | 2.51E-11 | 1.27E-10 |
| BAALC    | -0.05668 | 1.99E-01 | 2.54E-01 |
| BAAT     | -0.26023 | 2.04E-09 | 8.41E-09 |
| BACE1    | -0.14284 | 1.15E-03 | 2.29E-03 |
| BACE2    | 0.015153 | 7.32E-01 | 7.76E-01 |
| BACH1    | 0.253139 | 5.68E-09 | 2.23E-08 |
| BACH2    | 0.079183 | 7.26E-02 | 1.04E-01 |
| BAD      | -0.1475  | 7.87E-04 | 1.61E-03 |
| BAG1     | -0.26105 | 1.81E-09 | 7.49E-09 |
| BAG2     | 0.300723 | 3.17E-12 | 1.77E-11 |
| BAG3     | -0.01498 | 7.34E-01 | 7.79E-01 |
| BAG4     | 0.252044 | 6.64E-09 | 2.59E-08 |
| BAG5     | 0.117623 | 7.54E-03 | 1.31E-02 |
| BAGE2    | 0.140742 | 1.36E-03 | 2.68E-03 |
| BAGE     | 0.220837 | 4.15E-07 | 1.32E-06 |
| BAHCC1   | -0.35373 | 1.26E-16 | 1.08E-15 |
| BAHD1    | -0.19504 | 8.26E-06 | 2.24E-05 |
| BAI1     | -0.20282 | 3.49E-06 | 9.91E-06 |
| BAI2     | 0.210702 | 1.41E-06 | 4.18E-06 |
| BAI3     | -0.32572 | 3.41E-14 | 2.31E-13 |
| BAIAP2L1 | 0.16464  | 1.75E-04 | 3.94E-04 |
| BAIAP2L2 | 0.053027 | 2.30E-01 | 2.88E-01 |
| BAIAP2   | -0.37622 | 9.23E-19 | 9.59E-18 |
| BAIAP3   | -0.26533 | 9.55E-10 | 4.09E-09 |
| BAK1     | 0.190843 | 1.30E-05 | 3.42E-05 |
| BAMBI    | -0.02077 | 6.38E-01 | 6.93E-01 |
| BANF1    | 0.315562 | 2.27E-13 | 1.42E-12 |
| BANF2    | 0.082428 | 6.16E-02 | 8.92E-02 |
| BANK1    | -0.34987 | 2.83E-16 | 2.34E-15 |
| BANP     | 0.080984 | 6.63E-02 | 9.54E-02 |
| BAP1     | -0.13963 | 1.49E-03 | 2.91E-03 |
| BARD1    | 0.488912 | 2.66E-32 | 7.91E-31 |
| BARHL1   | -0.05395 | 2.22E-01 | 2.79E-01 |
| BARHL2   | 0.1374   | 1.78E-03 | 3.43E-03 |
| BARX1    | 0.028963 | 5.12E-01 | 5.76E-01 |

|         |          |          |          |
|---------|----------|----------|----------|
| BARX2   | -0.06073 | 1.69E-01 | 2.20E-01 |
| BASE    | -0.07243 | 1.01E-01 | 1.38E-01 |
| BASP1   | 0.192635 | 1.07E-05 | 2.85E-05 |
| BAT1    | -0.06568 | 1.37E-01 | 1.82E-01 |
| BAT2L1  | -0.06214 | 1.59E-01 | 2.08E-01 |
| BAT2L2  | 0.072341 | 1.01E-01 | 1.39E-01 |
| BAT2    | 0.116306 | 8.24E-03 | 1.42E-02 |
| BAT3    | -0.04354 | 3.24E-01 | 3.89E-01 |
| BAT4    | 0.015292 | 7.29E-01 | 7.74E-01 |
| BAT5    | -0.16688 | 1.42E-04 | 3.23E-04 |
| BATF2   | 0.21118  | 1.33E-06 | 3.96E-06 |
| BATF3   | 0.23658  | 5.54E-08 | 1.94E-07 |
| BATF    | 0.019754 | 6.55E-01 | 7.08E-01 |
| BAX     | 0.134534 | 2.22E-03 | 4.21E-03 |
| BAZ1A   | 0.174867 | 6.62E-05 | 1.58E-04 |
| BAZ1B   | 0.178515 | 4.62E-05 | 1.13E-04 |
| BAZ2A   | 0.14431  | 1.02E-03 | 2.05E-03 |
| BAZ2B   | -0.18765 | 1.82E-05 | 4.70E-05 |
| BBC3    | -0.1944  | 8.86E-06 | 2.39E-05 |
| BBOX1   | 0.056553 | 2.00E-01 | 2.55E-01 |
| BBS10   | -0.02478 | 5.75E-01 | 6.34E-01 |
| BBS12   | -0.07698 | 8.09E-02 | 1.14E-01 |
| BBS1    | -0.5095  | 2.27E-35 | 7.99E-34 |
| BBS2    | -0.3169  | 1.77E-13 | 1.12E-12 |
| BBS4    | -0.25906 | 2.42E-09 | 9.89E-09 |
| BBS5    | -0.32045 | 9.20E-14 | 5.98E-13 |
| BBS7    | 0.275628 | 1.97E-10 | 9.14E-10 |
| BBS9    | -0.09199 | 3.69E-02 | 5.59E-02 |
| BBX     | 0.25145  | 7.22E-09 | 2.80E-08 |
| BCAM    | -0.4717  | 6.83E-30 | 1.75E-28 |
| BCAN    | 0.161705 | 2.29E-04 | 5.07E-04 |
| BCAP29  | 0.132768 | 2.54E-03 | 4.77E-03 |
| BCAP31  | -0.04256 | 3.35E-01 | 4.01E-01 |
| BCAR1   | 0.006038 | 8.91E-01 | 9.12E-01 |
| BCAR3   | 0.239307 | 3.85E-08 | 1.37E-07 |
| BCAR4   | 0.136728 | 1.87E-03 | 3.60E-03 |
| BCAS1   | -0.19888 | 5.42E-06 | 1.50E-05 |
| BCAS2   | 0.258732 | 2.54E-09 | 1.04E-08 |
| BCAS3   | -0.24711 | 1.33E-08 | 4.98E-08 |
| BCAS4   | -0.06472 | 1.42E-01 | 1.89E-01 |
| BCAT1   | -0.05795 | 1.89E-01 | 2.43E-01 |
| BCAT2   | -0.30151 | 2.77E-12 | 1.55E-11 |
| BCCIP   | 0.356406 | 7.18E-17 | 6.31E-16 |
| BCDIN3D | -0.1479  | 7.61E-04 | 1.56E-03 |

|         |          |          |          |
|---------|----------|----------|----------|
| BCHE    | -0.30802 | 8.84E-13 | 5.22E-12 |
| BCKDHA  | -0.32162 | 7.40E-14 | 4.85E-13 |
| BCKDHB  | -0.1678  | 1.30E-04 | 2.99E-04 |
| BCKDK   | 0.016745 | 7.05E-01 | 7.53E-01 |
| BCL10   | 0.219258 | 5.04E-07 | 1.59E-06 |
| BCL11A  | -0.25977 | 2.18E-09 | 8.95E-09 |
| BCL11B  | -0.13209 | 2.67E-03 | 5.01E-03 |
| BCL2A1  | 0.154257 | 4.43E-04 | 9.37E-04 |
| BCL2L10 | 0.343548 | 1.03E-15 | 8.07E-15 |
| BCL2L11 | 0.22739  | 1.83E-07 | 6.06E-07 |
| BCL2L12 | 0.353783 | 1.25E-16 | 1.07E-15 |
| BCL2L13 | 0.19441  | 8.85E-06 | 2.39E-05 |
| BCL2L14 | -0.1268  | 3.95E-03 | 7.21E-03 |
| BCL2L15 | -0.20555 | 2.55E-06 | 7.36E-06 |
| BCL2L1  | 0.093796 | 3.33E-02 | 5.10E-02 |
| BCL2L2  | -0.22208 | 3.56E-07 | 1.14E-06 |
| BCL2    | -0.14166 | 1.27E-03 | 2.51E-03 |
| BCL3    | 0.134594 | 2.21E-03 | 4.19E-03 |
| BCL6B   | -0.13103 | 2.89E-03 | 5.39E-03 |
| BCL6    | -0.26992 | 4.77E-10 | 2.12E-09 |
| BCL7A   | -0.03516 | 4.26E-01 | 4.92E-01 |
| BCL7B   | 0.090022 | 4.11E-02 | 6.18E-02 |
| BCL7C   | -0.04166 | 3.45E-01 | 4.11E-01 |
| BCL8    | 0.012047 | 7.85E-01 | 8.22E-01 |
| BCL9L   | 0.010641 | 8.10E-01 | 8.42E-01 |
| BCL9    | -0.00758 | 8.64E-01 | 8.89E-01 |
| BCLAF1  | -0.04014 | 3.63E-01 | 4.30E-01 |
| BCMO1   | -0.17006 | 1.05E-04 | 2.45E-04 |
| BCO2    | -0.22339 | 3.02E-07 | 9.79E-07 |
| BCORL1  | -0.00123 | 9.78E-01 | 9.83E-01 |
| BCORL2  | -0.00648 | 8.83E-01 | 9.05E-01 |
| BCOR    | -0.17852 | 4.62E-05 | 1.13E-04 |
| BCR     | -0.11118 | 1.16E-02 | 1.94E-02 |
| BCS1L   | 0.140576 | 1.38E-03 | 2.72E-03 |
| BCYRN1  | 0.015421 | 7.27E-01 | 7.72E-01 |
| BDH1    | -0.02176 | 6.22E-01 | 6.78E-01 |
| BDH2    | -0.34971 | 2.92E-16 | 2.41E-15 |
| BDKRB1  | 0.25181  | 6.86E-09 | 2.67E-08 |
| BDKRB2  | 0.014716 | 7.39E-01 | 7.83E-01 |
| BDNFOS  | -0.3822  | 2.34E-19 | 2.58E-18 |
| BDNF    | -0.06382 | 1.48E-01 | 1.95E-01 |
| BDP1    | 0.025532 | 5.63E-01 | 6.24E-01 |
| BEAN    | 0.046582 | 2.91E-01 | 3.54E-01 |
| BECN1   | -0.02093 | 6.36E-01 | 6.91E-01 |

|         |          |           |           |
|---------|----------|-----------|-----------|
| BEGAIN  | -0.05796 | 1.89E-01  | 2.43E-01  |
| BEND2   | -0.11055 | 1.21E-02  | 2.02E-02  |
| BEND3   | 0.110835 | 1.18E-02  | 1.98E-02  |
| BEND4   | 0.096002 | 2.94E-02  | 4.54E-02  |
| BEND5   | -0.27565 | 1.97E-10  | 9.10E-10  |
| BEND6   | 0.401762 | 2.13E-21  | 2.80E-20  |
| BEND7   | -0.23567 | 6.25E-08  | 2.17E-07  |
| BEST1   | 0.084344 | 5.58E-02  | 8.14E-02  |
| BEST2   | 0.138755 | 1.60E-03  | 3.10E-03  |
| BEST3   | 0.347269 | 4.83E-16  | 3.91E-15  |
| BEST4   | -0.12556 | 4.32E-03  | 7.84E-03  |
| BET1L   | -0.29748 | 5.54E-12  | 3.01E-11  |
| BET1    | 0.074186 | 9.26E-02  | 1.29E-01  |
| BET3L   | 0.105751 | 1.64E-02  | 2.67E-02  |
| BEX1    | 0.014515 | 7.42E-01  | 7.86E-01  |
| BEX2    | -0.18395 | 2.67E-05  | 6.73E-05  |
| BEX4    | -0.31407 | 2.98E-13  | 1.85E-12  |
| BEX5    | -0.20442 | 2.91E-06  | 8.33E-06  |
| BEYLA   | -0.02274 | 6.07E-01  | 6.64E-01  |
| BFAR    | -0.30718 | 1.03E-12  | 6.01E-12  |
| BFSP1   | -0.04465 | 3.12E-01  | 3.76E-01  |
| BFSP2   | 0.042464 | 3.36E-01  | 4.02E-01  |
| BGLAP   | -0.11748 | 7.61E-03  | 1.32E-02  |
| BGN     | -0.16208 | 2.21E-04  | 4.91E-04  |
| BHLHA15 | 0.039126 | 3.76E-01  | 4.42E-01  |
| BHLHB9  | -0.0443  | 3.16E-01  | 3.80E-01  |
| BHLHE22 | -0.21317 | 1.05E-06  | 3.17E-06  |
| BHLHE23 | 0.064759 | 1.42E-01  | 1.89E-01  |
| BHLHE40 | -0.02816 | 5.24E-01  | 5.87E-01  |
| BHLHE41 | -0.05119 | 2.46E-01  | 3.06E-01  |
| BHMT2   | 0.019964 | 6.51E-01  | 7.05E-01  |
| BHMT    | -0.06729 | 1.27E-01  | 1.71E-01  |
| BICC1   | -0.02531 | 5.67E-01  | 6.27E-01  |
| BICD1   | 0.39317  | 1.74E-20  | 2.12E-19  |
| BICD2   | -0.11995 | 6.42E-03  | 1.13E-02  |
| BID     | 0.352918 | 1.50E-16  | 1.27E-15  |
| BIK     | 0.210364 | 1.46E-06  | 4.34E-06  |
| BIN1    | 0.074105 | 9.30E-02  | 1.29E-01  |
| BIN2    | -0.07611 | 8.44E-02  | 1.18E-01  |
| BIN3    | -0.15458 | 4.31E-04  | 9.13E-04  |
| BIRC2   | 0.171527 | 9.15E-05  | 2.14E-04  |
| BIRC3   | 0.091772 | 3.73E-02  | 5.65E-02  |
| BIRC5   | 0.862957 | 3.32E-154 | 2.21E-151 |
| BIRC6   | 0.064821 | 1.42E-01  | 1.88E-01  |

|         |          |          |          |
|---------|----------|----------|----------|
| BIRC7   | -0.16745 | 1.35E-04 | 3.08E-04 |
| BIRC8   | 0.04847  | 2.72E-01 | 3.34E-01 |
| BIVM    | -0.16702 | 1.40E-04 | 3.20E-04 |
| BLCAP   | -0.12356 | 4.99E-03 | 8.96E-03 |
| BLID    | 0.184769 | 2.45E-05 | 6.22E-05 |
| BLK     | -0.25379 | 5.18E-09 | 2.04E-08 |
| BLMH    | 0.197177 | 6.54E-06 | 1.79E-05 |
| BLM     | 0.741691 | 4.99E-91 | 7.03E-89 |
| BLNK    | -0.21603 | 7.45E-07 | 2.30E-06 |
| BLOC1S1 | -0.02021 | 6.47E-01 | 7.01E-01 |
| BLOC1S2 | 0.128151 | 3.58E-03 | 6.57E-03 |
| BLOC1S3 | 0.023026 | 6.02E-01 | 6.60E-01 |
| BLVRA   | -0.21261 | 1.12E-06 | 3.38E-06 |
| BLVRB   | -0.03216 | 4.66E-01 | 5.32E-01 |
| BLZF1   | 0.128245 | 3.55E-03 | 6.53E-03 |
| BMF     | -0.22963 | 1.37E-07 | 4.62E-07 |
| BMI1    | 0.097359 | 2.72E-02 | 4.23E-02 |
| BMP10   | 0.03075  | 4.86E-01 | 5.51E-01 |
| BMP15   | -0.09616 | 2.91E-02 | 4.51E-02 |
| BMP1    | 0.160657 | 2.51E-04 | 5.53E-04 |
| BMP2K   | 0.067141 | 1.28E-01 | 1.72E-01 |
| BMP2    | -0.29347 | 1.09E-11 | 5.73E-11 |
| BMP3    | -0.37093 | 3.04E-18 | 3.03E-17 |
| BMP4    | -0.22984 | 1.33E-07 | 4.50E-07 |
| BMP5    | -0.26591 | 8.76E-10 | 3.77E-09 |
| BMP6    | -0.11262 | 1.05E-02 | 1.78E-02 |
| BMP7    | -0.13054 | 3.00E-03 | 5.58E-03 |
| BMP8A   | 0.117895 | 7.40E-03 | 1.29E-02 |
| BMP8B   | 0.08145  | 6.48E-02 | 9.34E-02 |
| BMPER   | -0.25182 | 6.86E-09 | 2.67E-08 |
| BMPR1A  | -0.03501 | 4.28E-01 | 4.94E-01 |
| BMPR1B  | 0.069427 | 1.16E-01 | 1.57E-01 |
| BMPR2   | -0.17573 | 6.08E-05 | 1.46E-04 |
| BMS1P4  | -0.2424  | 2.53E-08 | 9.22E-08 |
| BMS1P5  | -0.28566 | 3.98E-11 | 1.96E-10 |
| BMS1    | 0.237211 | 5.09E-08 | 1.79E-07 |
| BMX     | -0.26768 | 6.71E-10 | 2.93E-09 |
| BNC1    | 0.074518 | 9.12E-02 | 1.27E-01 |
| BNC2    | -0.08723 | 4.79E-02 | 7.08E-02 |
| BNIP1   | 0.146031 | 8.88E-04 | 1.80E-03 |
| BNIP2   | 0.046653 | 2.91E-01 | 3.53E-01 |
| BNIP3L  | -0.17256 | 8.29E-05 | 1.95E-04 |
| BNIP3   | 0.073223 | 9.69E-02 | 1.34E-01 |
| BNIPL   | -0.40847 | 3.95E-22 | 5.50E-21 |

|        |          |           |           |
|--------|----------|-----------|-----------|
| BOC    | -0.21467 | 8.77E-07  | 2.68E-06  |
| BOD1L  | -0.07991 | 7.00E-02  | 1.00E-01  |
| BOD1   | 0.202183 | 3.75E-06  | 1.06E-05  |
| BOK    | -0.35623 | 7.46E-17  | 6.54E-16  |
| BOLA1  | 0.055025 | 2.13E-01  | 2.69E-01  |
| BOLA2  | 0.344559 | 8.41E-16  | 6.65E-15  |
| BOLA3  | 0.516414 | 1.90E-36  | 7.11E-35  |
| BOLL   | 0.077888 | 7.74E-02  | 1.10E-01  |
| BOP1   | 0.27653  | 1.71E-10  | 7.97E-10  |
| BPESC1 | 0.073338 | 9.64E-02  | 1.33E-01  |
| BPGM   | 0.071284 | 1.06E-01  | 1.45E-01  |
| BPHL   | 0.015539 | 7.25E-01  | 7.71E-01  |
| BPIL1  | -0.11164 | 1.12E-02  | 1.89E-02  |
| BPIL2  | 0.005064 | 9.09E-01  | 9.27E-01  |
| BPIL3  | -0.00394 | 9.29E-01  | 9.43E-01  |
| BPI    | -0.15918 | 2.87E-04  | 6.26E-04  |
| BPNT1  | -0.00686 | 8.77E-01  | 9.00E-01  |
| BPTF   | -0.06321 | 1.52E-01  | 2.00E-01  |
| BPY2   | 0.029965 | 4.97E-01  | 5.62E-01  |
| BRAF   | 0.170551 | 1.00E-04  | 2.34E-04  |
| BRAP   | 0.235789 | 6.15E-08  | 2.14E-07  |
| BRCA1  | 0.781288 | 4.41E-107 | 8.01E-105 |
| BRCA2  | 0.647364 | 1.70E-62  | 1.57E-60  |
| BRCC3  | 0.205509 | 2.57E-06  | 7.40E-06  |
| BRD1   | -0.32257 | 6.19E-14  | 4.09E-13  |
| BRD2   | -0.078   | 7.70E-02  | 1.09E-01  |
| BRD3   | -0.04906 | 2.66E-01  | 3.28E-01  |
| BRD4   | 0.117648 | 7.53E-03  | 1.31E-02  |
| BRD7P3 | 0.057764 | 1.91E-01  | 2.44E-01  |
| BRD7   | 0.007437 | 8.66E-01  | 8.91E-01  |
| BRD8   | -0.15746 | 3.34E-04  | 7.22E-04  |
| BRD9   | 0.097364 | 2.71E-02  | 4.23E-02  |
| BRDT   | -0.02696 | 5.42E-01  | 6.04E-01  |
| BREA2  | -0.17371 | 7.41E-05  | 1.76E-04  |
| BRE    | -0.0133  | 7.63E-01  | 8.03E-01  |
| BRF1   | -0.21058 | 1.43E-06  | 4.24E-06  |
| BRF2   | 0.129667 | 3.20E-03  | 5.93E-03  |
| BRI3BP | 0.621585 | 2.24E-56  | 1.78E-54  |
| BRI3   | -0.00341 | 9.38E-01  | 9.52E-01  |
| BRIP1  | 0.750659 | 2.14E-94  | 3.09E-92  |
| BRIX1  | 0.508092 | 3.74E-35  | 1.29E-33  |
| BRMS1L | 0.117239 | 7.74E-03  | 1.34E-02  |
| BRMS1  | 0.178418 | 4.66E-05  | 1.14E-04  |
| BRP44L | -0.22723 | 1.86E-07  | 6.17E-07  |

|        |          |          |          |
|--------|----------|----------|----------|
| BRP44  | -0.05103 | 2.48E-01 | 3.08E-01 |
| BRPF1  | 0.026354 | 5.51E-01 | 6.12E-01 |
| BRPF3  | -0.03041 | 4.91E-01 | 5.56E-01 |
| BRS3   | 0.042387 | 3.37E-01 | 4.02E-01 |
| BRSK1  | 0.218665 | 5.41E-07 | 1.70E-06 |
| BRSK2  | -0.04165 | 3.45E-01 | 4.11E-01 |
| BRWD1  | -0.21515 | 8.29E-07 | 2.54E-06 |
| BRWD3  | 0.186955 | 1.95E-05 | 5.03E-05 |
| BSCL2  | -0.25153 | 7.14E-09 | 2.77E-08 |
| BSDC1  | -0.32018 | 9.68E-14 | 6.27E-13 |
| BSG    | 0.041945 | 3.42E-01 | 4.08E-01 |
| BSND   | 0.161722 | 2.28E-04 | 5.06E-04 |
| BSN    | -0.07747 | 7.90E-02 | 1.12E-01 |
| BSPRY  | -0.02225 | 6.14E-01 | 6.71E-01 |
| BST1   | 0.041762 | 3.44E-01 | 4.10E-01 |
| BST2   | 0.002858 | 9.48E-01 | 9.59E-01 |
| BSX    | 0.077061 | 8.06E-02 | 1.14E-01 |
| BTAf1  | -0.10563 | 1.65E-02 | 2.69E-02 |
| BTBD10 | 0.219422 | 4.94E-07 | 1.56E-06 |
| BTBD11 | -0.00486 | 9.12E-01 | 9.30E-01 |
| BTBD12 | 0.01853  | 6.75E-01 | 7.26E-01 |
| BTBD16 | 0.109359 | 1.30E-02 | 2.17E-02 |
| BTBD17 | 0.150881 | 5.92E-04 | 1.23E-03 |
| BTBD18 | -0.1676  | 1.33E-04 | 3.04E-04 |
| BTBD19 | -0.07339 | 9.62E-02 | 1.33E-01 |
| BTBD1  | 0.112866 | 1.04E-02 | 1.75E-02 |
| BTBD2  | 0.041526 | 3.47E-01 | 4.13E-01 |
| BTBD3  | 0.028377 | 5.21E-01 | 5.84E-01 |
| BTBD6  | -0.07917 | 7.26E-02 | 1.04E-01 |
| BTBD7  | -0.14034 | 1.41E-03 | 2.76E-03 |
| BTBD8  | 0.072556 | 1.00E-01 | 1.38E-01 |
| BTBD9  | -0.55866 | 1.33E-43 | 7.25E-42 |
| BTC    | -0.22992 | 1.32E-07 | 4.46E-07 |
| BTD    | -0.45411 | 1.45E-27 | 3.12E-26 |
| BTF3L1 | 0.006698 | 8.79E-01 | 9.02E-01 |
| BTF3L4 | 0.267749 | 6.64E-10 | 2.90E-09 |
| BTF3   | 0.008515 | 8.47E-01 | 8.75E-01 |
| BTG1   | -0.20914 | 1.69E-06 | 4.98E-06 |
| BTG2   | -0.47825 | 8.57E-31 | 2.34E-29 |
| BTG3   | -0.17202 | 8.73E-05 | 2.05E-04 |
| BTG4   | -0.05728 | 1.94E-01 | 2.49E-01 |
| BTK    | -0.16547 | 1.62E-04 | 3.66E-04 |
| BTLA   | -0.15435 | 4.39E-04 | 9.30E-04 |
| BTN1A1 | -0.07687 | 8.14E-02 | 1.15E-01 |

|           |          |           |           |
|-----------|----------|-----------|-----------|
| BTN2A1    | -0.11211 | 1.09E-02  | 1.84E-02  |
| BTN2A2    | -0.17226 | 8.53E-05  | 2.01E-04  |
| BTN2A3    | -0.07667 | 8.22E-02  | 1.16E-01  |
| BTN3A1    | -0.0648  | 1.42E-01  | 1.88E-01  |
| BTN3A2    | -0.08516 | 5.34E-02  | 7.83E-02  |
| BTN3A3    | -0.14038 | 1.40E-03  | 2.76E-03  |
| BTNL2     | 0.026179 | 5.53E-01  | 6.15E-01  |
| BTNL3     | -0.04747 | 2.82E-01  | 3.44E-01  |
| BTNL8     | -0.21687 | 6.73E-07  | 2.09E-06  |
| BTNL9     | -0.54757 | 1.26E-41  | 6.27E-40  |
| BTRC      | -0.21461 | 8.84E-07  | 2.70E-06  |
| BUB1B     | 0.880872 | 9.38E-169 | 1.25E-165 |
| BUB1      | 0.898702 | 8.98E-186 | 5.98E-182 |
| BUB3      | 0.573651 | 2.13E-46  | 1.31E-44  |
| BUD13     | 0.197457 | 6.34E-06  | 1.74E-05  |
| BUD31     | 0.290473 | 1.80E-11  | 9.24E-11  |
| BVES      | 0.218681 | 5.40E-07  | 1.70E-06  |
| BYSL      | 0.4075   | 5.06E-22  | 6.97E-21  |
| BZRAP1    | -0.40954 | 3.01E-22  | 4.23E-21  |
| BZW1      | 0.430369 | 1.23E-24  | 2.12E-23  |
| BZW2      | 0.386918 | 7.74E-20  | 8.89E-19  |
| C10orf105 | -0.3946  | 1.24E-20  | 1.53E-19  |
| C10orf107 | -0.41163 | 1.77E-22  | 2.52E-21  |
| C10orf108 | -0.00431 | 9.22E-01  | 9.38E-01  |
| C10orf10  | -0.16379 | 1.89E-04  | 4.24E-04  |
| C10orf110 | -0.11994 | 6.43E-03  | 1.13E-02  |
| C10orf111 | -0.13527 | 2.09E-03  | 4.00E-03  |
| C10orf113 | -0.00072 | 9.87E-01  | 9.90E-01  |
| C10orf114 | 0.169977 | 1.06E-04  | 2.46E-04  |
| C10orf116 | -0.45309 | 1.95E-27  | 4.19E-26  |
| C10orf118 | -0.20233 | 3.68E-06  | 1.04E-05  |
| C10orf119 | 0.340258 | 2.00E-15  | 1.51E-14  |
| C10orf11  | -0.22972 | 1.36E-07  | 4.57E-07  |
| C10orf120 | -0.05356 | 2.25E-01  | 2.83E-01  |
| C10orf122 | 0.044047 | 3.18E-01  | 3.83E-01  |
| C10orf125 | 0.143089 | 1.13E-03  | 2.25E-03  |
| C10orf128 | -0.17663 | 5.57E-05  | 1.35E-04  |
| C10orf129 | 0.009152 | 8.36E-01  | 8.65E-01  |
| C10orf12  | 0.327361 | 2.50E-14  | 1.71E-13  |
| C10orf131 | 0.027868 | 5.28E-01  | 5.91E-01  |
| C10orf137 | -0.06133 | 1.65E-01  | 2.15E-01  |
| C10orf140 | -0.07832 | 7.58E-02  | 1.08E-01  |
| C10orf18  | 0.223463 | 2.99E-07  | 9.70E-07  |
| C10orf25  | 0.00602  | 8.92E-01  | 9.12E-01  |



|          |          |          |          |
|----------|----------|----------|----------|
| C10orf26 | -0.28684 | 3.28E-11 | 1.63E-10 |
| C10orf27 | 0.057265 | 1.94E-01 | 2.49E-01 |
| C10orf28 | -0.09265 | 3.56E-02 | 5.41E-02 |
| C10orf2  | 0.279155 | 1.13E-10 | 5.35E-10 |
| C10orf32 | -0.47671 | 1.40E-30 | 3.75E-29 |
| C10orf35 | 0.008706 | 8.44E-01 | 8.72E-01 |
| C10orf40 | 0.064263 | 1.45E-01 | 1.92E-01 |
| C10orf41 | -0.0444  | 3.15E-01 | 3.79E-01 |
| C10orf46 | 0.247891 | 1.19E-08 | 4.49E-08 |
| C10orf47 | -0.09286 | 3.51E-02 | 5.35E-02 |
| C10orf4  | -0.09344 | 3.40E-02 | 5.19E-02 |
| C10orf50 | -0.17352 | 7.55E-05 | 1.79E-04 |
| C10orf53 | -0.11654 | 8.12E-03 | 1.40E-02 |
| C10orf54 | -0.21033 | 1.47E-06 | 4.35E-06 |
| C10orf55 | 0.262171 | 1.53E-09 | 6.40E-09 |
| C10orf57 | -0.13292 | 2.51E-03 | 4.72E-03 |
| C10orf58 | 0.064681 | 1.43E-01 | 1.89E-01 |
| C10orf62 | 0.107194 | 1.49E-02 | 2.46E-02 |
| C10orf67 | -0.14191 | 1.24E-03 | 2.46E-03 |
| C10orf68 | -0.35114 | 2.17E-16 | 1.82E-15 |
| C10orf71 | -0.06858 | 1.20E-01 | 1.62E-01 |
| C10orf72 | -0.33285 | 8.66E-15 | 6.18E-14 |
| C10orf75 | -0.11447 | 9.33E-03 | 1.59E-02 |
| C10orf76 | -0.45056 | 4.11E-27 | 8.54E-26 |
| C10orf78 | 0.287749 | 2.82E-11 | 1.42E-10 |
| C10orf79 | -0.26755 | 6.84E-10 | 2.98E-09 |
| C10orf81 | -0.18768 | 1.81E-05 | 4.69E-05 |
| C10orf82 | 0.029936 | 4.98E-01 | 5.62E-01 |
| C10orf84 | 0.110228 | 1.23E-02 | 2.06E-02 |
| C10orf88 | 0.253351 | 5.51E-09 | 2.17E-08 |
| C10orf90 | 0.229637 | 1.37E-07 | 4.62E-07 |
| C10orf91 | 0.113801 | 9.75E-03 | 1.66E-02 |
| C10orf93 | -0.24887 | 1.04E-08 | 3.95E-08 |
| C10orf95 | -0.35495 | 9.77E-17 | 8.48E-16 |
| C10orf96 | 0.058717 | 1.83E-01 | 2.36E-01 |
| C10orf99 | 0.104852 | 1.73E-02 | 2.81E-02 |
| C11orf10 | 0.178047 | 4.84E-05 | 1.18E-04 |
| C11orf16 | -0.34495 | 7.77E-16 | 6.16E-15 |
| C11orf17 | 0.010065 | 8.20E-01 | 8.52E-01 |
| C11orf1  | -0.20287 | 3.47E-06 | 9.86E-06 |
| C11orf20 | 0.088974 | 4.36E-02 | 6.50E-02 |
| C11orf21 | -0.24852 | 1.09E-08 | 4.14E-08 |
| C11orf24 | 0.246197 | 1.51E-08 | 5.62E-08 |
| C11orf2  | -0.27    | 4.71E-10 | 2.10E-09 |

|          |          |           |           |
|----------|----------|-----------|-----------|
| C11orf30 | 0.106804 | 1.53E-02  | 2.51E-02  |
| C11orf31 | 0.119186 | 6.77E-03  | 1.19E-02  |
| C11orf34 | -0.10866 | 1.36E-02  | 2.26E-02  |
| C11orf35 | -0.31234 | 4.07E-13  | 2.49E-12  |
| C11orf36 | 0.058937 | 1.82E-01  | 2.34E-01  |
| C11orf41 | 0.110189 | 1.23E-02  | 2.06E-02  |
| C11orf42 | -0.15391 | 4.56E-04  | 9.64E-04  |
| C11orf45 | -0.09439 | 3.22E-02  | 4.94E-02  |
| C11orf46 | -0.11548 | 8.71E-03  | 1.49E-02  |
| C11orf48 | 0.229319 | 1.43E-07  | 4.80E-07  |
| C11orf49 | -0.28595 | 3.79E-11  | 1.87E-10  |
| C11orf51 | 0.011944 | 7.87E-01  | 8.23E-01  |
| C11orf52 | -0.42034 | 1.83E-23  | 2.85E-22  |
| C11orf53 | 0.042152 | 3.40E-01  | 4.05E-01  |
| C11orf54 | -0.3072  | 1.02E-12  | 5.99E-12  |
| C11orf57 | 0.068544 | 1.20E-01  | 1.62E-01  |
| C11orf58 | 0.003633 | 9.34E-01  | 9.48E-01  |
| C11orf59 | 0.080314 | 6.86E-02  | 9.85E-02  |
| C11orf61 | -0.35162 | 1.96E-16  | 1.65E-15  |
| C11orf63 | -0.2257  | 2.26E-07  | 7.43E-07  |
| C11orf64 | 0.029857 | 4.99E-01  | 5.64E-01  |
| C11orf65 | -0.11398 | 9.63E-03  | 1.64E-02  |
| C11orf66 | -0.3361  | 4.58E-15  | 3.37E-14  |
| C11orf67 | -0.07904 | 7.31E-02  | 1.04E-01  |
| C11orf68 | -0.10346 | 1.88E-02  | 3.03E-02  |
| C11orf70 | -0.11641 | 8.18E-03  | 1.41E-02  |
| C11orf71 | -0.09549 | 3.03E-02  | 4.67E-02  |
| C11orf73 | 0.209465 | 1.62E-06  | 4.80E-06  |
| C11orf74 | -0.05375 | 2.23E-01  | 2.81E-01  |
| C11orf75 | -0.18638 | 2.07E-05  | 5.32E-05  |
| C11orf80 | 0.143951 | 1.05E-03  | 2.11E-03  |
| C11orf82 | 0.785786 | 4.05E-109 | 7.71E-107 |
| C11orf83 | 0.180013 | 3.98E-05  | 9.80E-05  |
| C11orf84 | 0.434924 | 3.52E-25  | 6.31E-24  |
| C11orf85 | 0.067127 | 1.28E-01  | 1.72E-01  |
| C11orf86 | 0.165334 | 1.64E-04  | 3.70E-04  |
| C11orf87 | 0.036117 | 4.13E-01  | 4.80E-01  |
| C11orf88 | -0.28384 | 5.34E-11  | 2.60E-10  |
| C11orf90 | 0.217951 | 5.91E-07  | 1.84E-06  |
| C11orf92 | -0.37812 | 5.98E-19  | 6.31E-18  |
| C11orf93 | -0.29428 | 9.53E-12  | 5.04E-11  |
| C11orf94 | 0.01279  | 7.72E-01  | 8.10E-01  |
| C11orf95 | -0.06072 | 1.69E-01  | 2.20E-01  |
| C11orf9  | -0.0333  | 4.51E-01  | 5.17E-01  |

|          |          |           |           |
|----------|----------|-----------|-----------|
| C12orf10 | 0.163628 | 1.92E-04  | 4.30E-04  |
| C12orf11 | 0.570555 | 8.26E-46  | 4.97E-44  |
| C12orf12 | 0.061698 | 1.62E-01  | 2.12E-01  |
| C12orf23 | 0.378314 | 5.72E-19  | 6.05E-18  |
| C12orf24 | 0.334178 | 6.68E-15  | 4.83E-14  |
| C12orf26 | -0.00763 | 8.63E-01  | 8.88E-01  |
| C12orf27 | -0.2199  | 4.66E-07  | 1.47E-06  |
| C12orf29 | 0.422384 | 1.06E-23  | 1.70E-22  |
| C12orf32 | 0.473819 | 3.51E-30  | 9.15E-29  |
| C12orf34 | 0.354902 | 9.87E-17  | 8.56E-16  |
| C12orf35 | 0.106888 | 1.52E-02  | 2.50E-02  |
| C12orf36 | 0.151951 | 5.40E-04  | 1.13E-03  |
| C12orf39 | 0.339992 | 2.11E-15  | 1.59E-14  |
| C12orf40 | 0.019208 | 6.64E-01  | 7.16E-01  |
| C12orf41 | 0.312075 | 4.27E-13  | 2.60E-12  |
| C12orf42 | -0.03583 | 4.17E-01  | 4.84E-01  |
| C12orf43 | 0.434415 | 4.06E-25  | 7.21E-24  |
| C12orf44 | 0.26726  | 7.15E-10  | 3.11E-09  |
| C12orf45 | 0.324914 | 3.98E-14  | 2.68E-13  |
| C12orf47 | 0.100084 | 2.31E-02  | 3.66E-02  |
| C12orf48 | 0.804357 | 4.45E-118 | 9.98E-116 |
| C12orf49 | 0.109532 | 1.29E-02  | 2.14E-02  |
| C12orf4  | 0.350653 | 2.40E-16  | 2.00E-15  |
| C12orf50 | -0.02305 | 6.02E-01  | 6.59E-01  |
| C12orf51 | -0.08011 | 6.93E-02  | 9.93E-02  |
| C12orf52 | 0.247801 | 1.21E-08  | 4.55E-08  |
| C12orf53 | -0.00852 | 8.47E-01  | 8.75E-01  |
| C12orf54 | 0.015319 | 7.29E-01  | 7.74E-01  |
| C12orf56 | 0.301056 | 2.99E-12  | 1.68E-11  |
| C12orf57 | 0.02621  | 5.53E-01  | 6.14E-01  |
| C12orf59 | -0.05134 | 2.45E-01  | 3.05E-01  |
| C12orf5  | 0.261985 | 1.57E-09  | 6.58E-09  |
| C12orf60 | 0.122963 | 5.20E-03  | 9.31E-03  |
| C12orf61 | 0.099936 | 2.33E-02  | 3.68E-02  |
| C12orf62 | -0.11668 | 8.04E-03  | 1.39E-02  |
| C12orf63 | -0.14092 | 1.35E-03  | 2.65E-03  |
| C12orf65 | 0.15357  | 4.70E-04  | 9.90E-04  |
| C12orf66 | 0.267711 | 6.67E-10  | 2.92E-09  |
| C12orf68 | -0.09792 | 2.63E-02  | 4.10E-02  |
| C12orf69 | -0.40139 | 2.34E-21  | 3.06E-20  |
| C12orf70 | 0.386362 | 8.83E-20  | 1.01E-18  |
| C12orf71 | -0.11607 | 8.38E-03  | 1.44E-02  |
| C12orf72 | -0.23192 | 1.02E-07  | 3.48E-07  |
| C12orf73 | 0.307331 | 9.98E-13  | 5.86E-12  |

|           |          |          |          |
|-----------|----------|----------|----------|
| C12orf74  | -0.14692 | 8.25E-04 | 1.68E-03 |
| C12orf75  | 0.172938 | 7.99E-05 | 1.89E-04 |
| C12orf76  | -0.26419 | 1.13E-09 | 4.82E-09 |
| C12orf77  | -0.01915 | 6.65E-01 | 7.17E-01 |
| C13orf15  | -0.42504 | 5.23E-24 | 8.57E-23 |
| C13orf16  | 0.123402 | 5.04E-03 | 9.05E-03 |
| C13orf18  | -0.09284 | 3.52E-02 | 5.36E-02 |
| C13orf1   | -0.01725 | 6.96E-01 | 7.45E-01 |
| C13orf23  | 0.045465 | 3.03E-01 | 3.67E-01 |
| C13orf26  | -0.21734 | 6.36E-07 | 1.98E-06 |
| C13orf27  | 0.513219 | 6.02E-36 | 2.18E-34 |
| C13orf29  | 0.350576 | 2.44E-16 | 2.03E-15 |
| C13orf30  | -0.31858 | 1.30E-13 | 8.33E-13 |
| C13orf31  | 0.025975 | 5.56E-01 | 6.18E-01 |
| C13orf33  | 0.135371 | 2.08E-03 | 3.97E-03 |
| C13orf34  | 0.623831 | 6.92E-57 | 5.57E-55 |
| C13orf35  | -0.13107 | 2.88E-03 | 5.38E-03 |
| C13orf36  | -0.12225 | 5.47E-03 | 9.75E-03 |
| C13orf37  | 0.497901 | 1.29E-33 | 4.09E-32 |
| C13orf38  | 0.248666 | 1.07E-08 | 4.06E-08 |
| C13orf39  | -0.24579 | 1.59E-08 | 5.93E-08 |
| C14orf101 | -0.03401 | 4.41E-01 | 5.08E-01 |
| C14orf102 | -0.13516 | 2.11E-03 | 4.02E-03 |
| C14orf104 | 0.158735 | 2.99E-04 | 6.50E-04 |
| C14orf105 | -0.18076 | 3.69E-05 | 9.14E-05 |
| C14orf106 | 0.347638 | 4.48E-16 | 3.64E-15 |
| C14orf109 | 0.118465 | 7.12E-03 | 1.24E-02 |
| C14orf115 | -0.01917 | 6.64E-01 | 7.16E-01 |
| C14orf118 | 0.334846 | 5.86E-15 | 4.27E-14 |
| C14orf119 | 0.116859 | 7.94E-03 | 1.37E-02 |
| C14orf126 | 0.091114 | 3.87E-02 | 5.84E-02 |
| C14orf128 | 0.070017 | 1.13E-01 | 1.53E-01 |
| C14orf129 | 0.335449 | 5.21E-15 | 3.81E-14 |
| C14orf132 | -0.27543 | 2.03E-10 | 9.41E-10 |
| C14orf135 | 0.130701 | 2.96E-03 | 5.52E-03 |
| C14orf138 | -0.05448 | 2.17E-01 | 2.74E-01 |
| C14orf139 | -0.2628  | 1.39E-09 | 5.86E-09 |
| C14orf142 | 0.033752 | 4.45E-01 | 5.11E-01 |
| C14orf143 | 0.316797 | 1.81E-13 | 1.14E-12 |
| C14orf145 | 0.370805 | 3.13E-18 | 3.11E-17 |
| C14orf147 | 0.076547 | 8.27E-02 | 1.16E-01 |
| C14orf148 | -0.07991 | 7.00E-02 | 1.00E-01 |
| C14orf149 | 0.077215 | 8.00E-02 | 1.13E-01 |
| C14orf153 | 0.233994 | 7.79E-08 | 2.69E-07 |

|            |          |          |          |
|------------|----------|----------|----------|
| C14orf156  | 0.308004 | 8.85E-13 | 5.23E-12 |
| C14orf159  | -0.33869 | 2.74E-15 | 2.05E-14 |
| C14orf162  | 0.098634 | 2.52E-02 | 3.95E-02 |
| C14orf165  | -0.00941 | 8.31E-01 | 8.61E-01 |
| C14orf166B | -0.07797 | 7.71E-02 | 1.09E-01 |
| C14orf166  | 0.268575 | 5.85E-10 | 2.57E-09 |
| C14orf167  | -0.16136 | 2.36E-04 | 5.21E-04 |
| C14orf169  | 0.070893 | 1.08E-01 | 1.48E-01 |
| C14orf174  | -0.06183 | 1.61E-01 | 2.11E-01 |
| C14orf176  | -0.08318 | 5.92E-02 | 8.61E-02 |
| C14orf178  | -0.18386 | 2.69E-05 | 6.78E-05 |
| C14orf179  | -0.00077 | 9.86E-01 | 9.89E-01 |
| C14orf180  | -0.36814 | 5.66E-18 | 5.48E-17 |
| C14orf181  | -0.07372 | 9.47E-02 | 1.31E-01 |
| C14orf182  | 0.023147 | 6.00E-01 | 6.58E-01 |
| C14orf183  | -0.04107 | 3.52E-01 | 4.18E-01 |
| C14orf184  | -0.12576 | 4.26E-03 | 7.74E-03 |
| C14orf19   | -0.03958 | 3.70E-01 | 4.36E-01 |
| C14orf1    | 0.03461  | 4.33E-01 | 5.00E-01 |
| C14orf21   | 0.099589 | 2.38E-02 | 3.76E-02 |
| C14orf23   | 0.185975 | 2.16E-05 | 5.54E-05 |
| C14orf28   | -0.3084  | 8.26E-13 | 4.90E-12 |
| C14orf2    | 0.240275 | 3.38E-08 | 1.21E-07 |
| C14orf33   | 0.27734  | 1.51E-10 | 7.05E-10 |
| C14orf34   | 0.234979 | 6.84E-08 | 2.38E-07 |
| C14orf37   | 0.063399 | 1.51E-01 | 1.99E-01 |
| C14orf39   | -0.05782 | 1.90E-01 | 2.44E-01 |
| C14orf43   | -0.07308 | 9.76E-02 | 1.35E-01 |
| C14orf45   | -0.23992 | 3.55E-08 | 1.27E-07 |
| C14orf48   | 0.038975 | 3.77E-01 | 4.44E-01 |
| C14orf49   | -0.06585 | 1.36E-01 | 1.81E-01 |
| C14orf4    | -0.03237 | 4.64E-01 | 5.29E-01 |
| C14orf50   | 0.000934 | 9.83E-01 | 9.87E-01 |
| C14orf53   | -0.0132  | 7.65E-01 | 8.05E-01 |
| C14orf64   | -0.34387 | 9.67E-16 | 7.58E-15 |
| C14orf68   | 0.111195 | 1.16E-02 | 1.94E-02 |
| C14orf70   | 0.070983 | 1.08E-01 | 1.47E-01 |
| C14orf72   | -0.0622  | 1.59E-01 | 2.08E-01 |
| C14orf73   | -0.18277 | 3.01E-05 | 7.53E-05 |
| C14orf79   | -0.24712 | 1.33E-08 | 4.98E-08 |
| C14orf80   | 0.370409 | 3.41E-18 | 3.39E-17 |
| C14orf86   | -0.1391  | 1.55E-03 | 3.03E-03 |
| C14orf93   | -0.16397 | 1.86E-04 | 4.17E-04 |
| C15orf17   | -0.48739 | 4.40E-32 | 1.29E-30 |

|          |          |           |           |
|----------|----------|-----------|-----------|
| C15orf21 | 0.263843 | 1.19E-09  | 5.06E-09  |
| C15orf23 | 0.671682 | 7.71E-69  | 7.90E-67  |
| C15orf24 | 0.036827 | 4.04E-01  | 4.71E-01  |
| C15orf26 | -0.20907 | 1.70E-06  | 5.01E-06  |
| C15orf27 | -0.10582 | 1.63E-02  | 2.66E-02  |
| C15orf28 | -0.26371 | 1.22E-09  | 5.15E-09  |
| C15orf29 | 0.107044 | 1.51E-02  | 2.48E-02  |
| C15orf2  | -0.18307 | 2.92E-05  | 7.32E-05  |
| C15orf32 | 0.043051 | 3.30E-01  | 3.95E-01  |
| C15orf33 | -0.12918 | 3.32E-03  | 6.13E-03  |
| C15orf34 | -0.29315 | 1.15E-11  | 6.03E-11  |
| C15orf37 | -0.15088 | 5.92E-04  | 1.23E-03  |
| C15orf38 | -0.27759 | 1.45E-10  | 6.80E-10  |
| C15orf39 | -0.13049 | 3.01E-03  | 5.60E-03  |
| C15orf40 | -0.04635 | 2.94E-01  | 3.57E-01  |
| C15orf41 | 0.411273 | 1.93E-22  | 2.75E-21  |
| C15orf42 | 0.779616 | 2.45E-106 | 4.41E-104 |
| C15orf43 | -0.12103 | 5.96E-03  | 1.06E-02  |
| C15orf44 | 0.163835 | 1.88E-04  | 4.22E-04  |
| C15orf48 | 0.410936 | 2.11E-22  | 2.99E-21  |
| C15orf50 | -0.25317 | 5.65E-09  | 2.22E-08  |
| C15orf51 | -0.21159 | 1.27E-06  | 3.79E-06  |
| C15orf52 | -0.31742 | 1.61E-13  | 1.03E-12  |
| C15orf53 | 0.070484 | 1.10E-01  | 1.50E-01  |
| C15orf54 | -0.12635 | 4.08E-03  | 7.43E-03  |
| C15orf55 | -0.00018 | 9.97E-01  | 9.97E-01  |
| C15orf56 | -0.36954 | 4.14E-18  | 4.07E-17  |
| C15orf57 | -0.12747 | 3.76E-03  | 6.89E-03  |
| C15orf58 | 0.011565 | 7.93E-01  | 8.29E-01  |
| C15orf59 | -0.50597 | 7.91E-35  | 2.68E-33  |
| C15orf5  | -0.10273 | 1.97E-02  | 3.16E-02  |
| C15orf60 | -0.09204 | 3.68E-02  | 5.58E-02  |
| C15orf61 | -0.02272 | 6.07E-01  | 6.64E-01  |
| C15orf62 | -0.24006 | 3.48E-08  | 1.25E-07  |
| C15orf63 | 0.138862 | 1.58E-03  | 3.08E-03  |
| C16orf11 | 0.112234 | 1.08E-02  | 1.82E-02  |
| C16orf13 | -0.13193 | 2.70E-03  | 5.06E-03  |
| C16orf3  | -0.21459 | 8.86E-07  | 2.70E-06  |
| C16orf42 | -0.11287 | 1.04E-02  | 1.75E-02  |
| C16orf45 | -0.22732 | 1.84E-07  | 6.11E-07  |
| C16orf46 | -0.18031 | 3.86E-05  | 9.53E-05  |
| C16orf48 | -0.39359 | 1.58E-20  | 1.93E-19  |
| C16orf52 | -0.18554 | 2.26E-05  | 5.78E-05  |
| C16orf53 | 0.023753 | 5.91E-01  | 6.49E-01  |

|           |          |          |          |
|-----------|----------|----------|----------|
| C16orf54  | -0.28459 | 4.73E-11 | 2.31E-10 |
| C16orf55  | -0.0743  | 9.21E-02 | 1.28E-01 |
| C16orf57  | 0.136559 | 1.90E-03 | 3.65E-03 |
| C16orf58  | -0.43576 | 2.79E-25 | 5.03E-24 |
| C16orf59  | 0.620077 | 4.91E-56 | 3.85E-54 |
| C16orf5   | -0.30873 | 7.78E-13 | 4.62E-12 |
| C16orf61  | 0.394795 | 1.18E-20 | 1.46E-19 |
| C16orf62  | -0.19723 | 6.50E-06 | 1.78E-05 |
| C16orf63  | 0.133997 | 2.31E-03 | 4.37E-03 |
| C16orf68  | 0.085319 | 5.30E-02 | 7.77E-02 |
| C16orf70  | 0.109233 | 1.31E-02 | 2.18E-02 |
| C16orf71  | -0.35708 | 6.22E-17 | 5.50E-16 |
| C16orf72  | -0.04762 | 2.81E-01 | 3.43E-01 |
| C16orf73  | 0.233684 | 8.11E-08 | 2.80E-07 |
| C16orf74  | 0.07901  | 7.32E-02 | 1.04E-01 |
| C16orf75  | 0.52896  | 1.81E-38 | 7.61E-37 |
| C16orf78  | -0.01268 | 7.74E-01 | 8.12E-01 |
| C16orf79  | -0.10668 | 1.54E-02 | 2.53E-02 |
| C16orf7   | -0.12202 | 5.56E-03 | 9.90E-03 |
| C16orf80  | 0.089601 | 4.21E-02 | 6.31E-02 |
| C16orf81  | -0.17322 | 7.77E-05 | 1.84E-04 |
| C16orf82  | 0.002353 | 9.58E-01 | 9.66E-01 |
| C16orf86  | -0.30764 | 9.45E-13 | 5.57E-12 |
| C16orf87  | 0.312475 | 3.97E-13 | 2.43E-12 |
| C16orf88  | 0.382332 | 2.27E-19 | 2.51E-18 |
| C16orf89  | -0.66419 | 8.05E-67 | 8.09E-65 |
| C16orf90  | 0.059204 | 1.80E-01 | 2.32E-01 |
| C16orf91  | 0.091283 | 3.84E-02 | 5.79E-02 |
| C16orf92  | 0.005268 | 9.05E-01 | 9.23E-01 |
| C16orf93  | -0.2883  | 2.58E-11 | 1.30E-10 |
| C17orf100 | -0.06947 | 1.15E-01 | 1.56E-01 |
| C17orf101 | -0.11179 | 1.11E-02 | 1.87E-02 |
| C17orf102 | -0.34297 | 1.16E-15 | 9.01E-15 |
| C17orf103 | -0.50916 | 2.57E-35 | 8.99E-34 |
| C17orf104 | 0.301876 | 2.60E-12 | 1.46E-11 |
| C17orf105 | -0.01914 | 6.65E-01 | 7.17E-01 |
| C17orf106 | 0.01086  | 8.06E-01 | 8.40E-01 |
| C17orf107 | -0.21283 | 1.09E-06 | 3.29E-06 |
| C17orf108 | -0.51702 | 1.52E-36 | 5.72E-35 |
| C17orf28  | -0.2197  | 4.77E-07 | 1.51E-06 |
| C17orf37  | 0.146103 | 8.83E-04 | 1.79E-03 |
| C17orf39  | -0.22347 | 2.99E-07 | 9.70E-07 |
| C17orf42  | 0.377166 | 7.44E-19 | 7.80E-18 |
| C17orf44  | -0.32471 | 4.14E-14 | 2.78E-13 |

|          |          |          |          |
|----------|----------|----------|----------|
| C17orf46 | -0.10813 | 1.41E-02 | 2.33E-02 |
| C17orf47 | -0.14741 | 7.92E-04 | 1.62E-03 |
| C17orf48 | -0.22846 | 1.59E-07 | 5.32E-07 |
| C17orf49 | 0.019878 | 6.53E-01 | 7.06E-01 |
| C17orf50 | -0.33371 | 7.32E-15 | 5.27E-14 |
| C17orf51 | 0.065777 | 1.36E-01 | 1.81E-01 |
| C17orf53 | 0.730114 | 7.02E-87 | 9.42E-85 |
| C17orf54 | -0.20103 | 4.27E-06 | 1.20E-05 |
| C17orf55 | -0.27288 | 3.02E-10 | 1.38E-09 |
| C17orf56 | -0.12686 | 3.93E-03 | 7.18E-03 |
| C17orf57 | -0.03943 | 3.72E-01 | 4.38E-01 |
| C17orf58 | 0.401605 | 2.22E-21 | 2.91E-20 |
| C17orf59 | -0.25126 | 7.42E-09 | 2.87E-08 |
| C17orf60 | 0.008094 | 8.55E-01 | 8.81E-01 |
| C17orf61 | 0.03898  | 3.77E-01 | 4.44E-01 |
| C17orf62 | 0.057774 | 1.91E-01 | 2.44E-01 |
| C17orf63 | 0.105796 | 1.63E-02 | 2.66E-02 |
| C17orf64 | 0.202914 | 3.45E-06 | 9.81E-06 |
| C17orf65 | -0.1565  | 3.64E-04 | 7.81E-04 |
| C17orf66 | -0.00188 | 9.66E-01 | 9.74E-01 |
| C17orf67 | 0.119469 | 6.64E-03 | 1.16E-02 |
| C17orf68 | -0.28464 | 4.69E-11 | 2.29E-10 |
| C17orf69 | -0.0683  | 1.22E-01 | 1.64E-01 |
| C17orf70 | 0.000128 | 9.98E-01 | 9.98E-01 |
| C17orf71 | 0.333238 | 8.03E-15 | 5.74E-14 |
| C17orf72 | -0.34144 | 1.58E-15 | 1.21E-14 |
| C17orf73 | 0.075893 | 8.53E-02 | 1.20E-01 |
| C17orf74 | 0.128426 | 3.51E-03 | 6.45E-03 |
| C17orf75 | 0.385427 | 1.10E-19 | 1.24E-18 |
| C17orf76 | -0.07642 | 8.32E-02 | 1.17E-01 |
| C17orf77 | 0.081363 | 6.50E-02 | 9.38E-02 |
| C17orf78 | 0.029043 | 5.11E-01 | 5.75E-01 |
| C17orf79 | 0.321118 | 8.12E-14 | 5.31E-13 |
| C17orf80 | 0.228662 | 1.55E-07 | 5.19E-07 |
| C17orf81 | 0.088065 | 4.58E-02 | 6.81E-02 |
| C17orf82 | -0.13416 | 2.28E-03 | 4.32E-03 |
| C17orf85 | 0.023457 | 5.95E-01 | 6.53E-01 |
| C17orf86 | -0.01769 | 6.89E-01 | 7.38E-01 |
| C17orf87 | -0.07573 | 8.60E-02 | 1.20E-01 |
| C17orf88 | -0.05976 | 1.76E-01 | 2.28E-01 |
| C17orf89 | 0.161023 | 2.43E-04 | 5.37E-04 |
| C17orf90 | 0.016313 | 7.12E-01 | 7.59E-01 |
| C17orf91 | -0.42354 | 7.81E-24 | 1.26E-22 |
| C17orf93 | 0.20477  | 2.79E-06 | 8.02E-06 |



|          |          |          |          |
|----------|----------|----------|----------|
| C17orf95 | 0.134477 | 2.23E-03 | 4.22E-03 |
| C17orf96 | 0.406866 | 5.94E-22 | 8.15E-21 |
| C17orf97 | -0.28285 | 6.27E-11 | 3.04E-10 |
| C17orf98 | -0.02517 | 5.69E-01 | 6.29E-01 |
| C17orf99 | 0.069675 | 1.14E-01 | 1.55E-01 |
| C18orf10 | 0.032535 | 4.61E-01 | 5.27E-01 |
| C18orf16 | -0.32188 | 7.04E-14 | 4.63E-13 |
| C18orf18 | 0.028059 | 5.25E-01 | 5.89E-01 |
| C18orf19 | 0.443069 | 3.56E-26 | 6.95E-25 |
| C18orf1  | -0.37455 | 1.35E-18 | 1.38E-17 |
| C18orf20 | -0.12023 | 6.30E-03 | 1.11E-02 |
| C18orf21 | 0.149428 | 6.69E-04 | 1.38E-03 |
| C18orf22 | 0.016677 | 7.06E-01 | 7.54E-01 |
| C18orf25 | 0.046983 | 2.87E-01 | 3.50E-01 |
| C18orf26 | 0.044847 | 3.10E-01 | 3.74E-01 |
| C18orf2  | 0.244858 | 1.81E-08 | 6.70E-08 |
| C18orf32 | -0.03867 | 3.81E-01 | 4.48E-01 |
| C18orf34 | -0.05965 | 1.77E-01 | 2.29E-01 |
| C18orf45 | -0.01117 | 8.00E-01 | 8.35E-01 |
| C18orf54 | 0.599728 | 1.29E-51 | 9.02E-50 |
| C18orf55 | 0.24104  | 3.05E-08 | 1.10E-07 |
| C18orf56 | 0.494445 | 4.18E-33 | 1.29E-31 |
| C18orf62 | 0.136761 | 1.87E-03 | 3.59E-03 |
| C18orf8  | 0.075181 | 8.83E-02 | 1.23E-01 |
| C19orf10 | 0.101286 | 2.15E-02 | 3.42E-02 |
| C19orf12 | 0.134228 | 2.27E-03 | 4.30E-03 |
| C19orf18 | -0.21408 | 9.42E-07 | 2.86E-06 |
| C19orf20 | -0.0416  | 3.46E-01 | 4.12E-01 |
| C19orf21 | -0.04423 | 3.16E-01 | 3.81E-01 |
| C19orf22 | 0.067907 | 1.24E-01 | 1.67E-01 |
| C19orf23 | 0.158254 | 3.12E-04 | 6.76E-04 |
| C19orf24 | 0.065413 | 1.38E-01 | 1.84E-01 |
| C19orf25 | -0.06246 | 1.57E-01 | 2.06E-01 |
| C19orf26 | 0.240326 | 3.36E-08 | 1.21E-07 |
| C19orf28 | 0.263627 | 1.23E-09 | 5.21E-09 |
| C19orf29 | 0.020511 | 6.42E-01 | 6.97E-01 |
| C19orf2  | 0.118203 | 7.25E-03 | 1.26E-02 |
| C19orf30 | 0.128807 | 3.41E-03 | 6.29E-03 |
| C19orf33 | -0.07363 | 9.51E-02 | 1.32E-01 |
| C19orf34 | -0.09951 | 2.39E-02 | 3.77E-02 |
| C19orf35 | -0.20191 | 3.86E-06 | 1.09E-05 |
| C19orf36 | -0.28767 | 2.86E-11 | 1.44E-10 |
| C19orf38 | -0.0014  | 9.75E-01 | 9.81E-01 |
| C19orf39 | -0.18879 | 1.61E-05 | 4.21E-05 |

|           |          |          |          |
|-----------|----------|----------|----------|
| C19orf40  | 0.569057 | 1.58E-45 | 9.40E-44 |
| C19orf41  | -0.10211 | 2.05E-02 | 3.27E-02 |
| C19orf42  | -0.14998 | 6.39E-04 | 1.32E-03 |
| C19orf43  | 0.022036 | 6.18E-01 | 6.74E-01 |
| C19orf44  | -0.31029 | 5.89E-13 | 3.54E-12 |
| C19orf45  | 0.107745 | 1.44E-02 | 2.38E-02 |
| C19orf46  | -0.08833 | 4.51E-02 | 6.72E-02 |
| C19orf47  | 0.319143 | 1.17E-13 | 7.54E-13 |
| C19orf48  | 0.496338 | 2.20E-33 | 6.90E-32 |
| C19orf50  | 0.097359 | 2.72E-02 | 4.23E-02 |
| C19orf51  | -0.12136 | 5.82E-03 | 1.03E-02 |
| C19orf52  | 0.073925 | 9.38E-02 | 1.30E-01 |
| C19orf53  | 0.118132 | 7.28E-03 | 1.27E-02 |
| C19orf54  | -0.03448 | 4.35E-01 | 5.01E-01 |
| C19orf55  | 0.200157 | 4.70E-06 | 1.32E-05 |
| C19orf56  | -0.18489 | 2.42E-05 | 6.15E-05 |
| C19orf57  | 0.242428 | 2.53E-08 | 9.19E-08 |
| C19orf59  | -0.15597 | 3.81E-04 | 8.16E-04 |
| C19orf60  | -0.07882 | 7.39E-02 | 1.05E-01 |
| C19orf61  | 0.08898  | 4.36E-02 | 6.50E-02 |
| C19orf62  | 0.134673 | 2.19E-03 | 4.17E-03 |
| C19orf63  | -0.19622 | 7.27E-06 | 1.98E-05 |
| C19orf66  | -0.20829 | 1.86E-06 | 5.47E-06 |
| C19orf69  | -0.15439 | 4.38E-04 | 9.27E-04 |
| C19orf6   | -0.10237 | 2.01E-02 | 3.22E-02 |
| C19orf70  | -0.00293 | 9.47E-01 | 9.58E-01 |
| C19orf71  | -0.06851 | 1.20E-01 | 1.63E-01 |
| C19orf73  | 0.013349 | 7.62E-01 | 8.02E-01 |
| C19orf75  | -0.03559 | 4.20E-01 | 4.86E-01 |
| C19orf76  | -0.02223 | 6.15E-01 | 6.71E-01 |
| C19orf77  | 0.098374 | 2.56E-02 | 4.00E-02 |
| C1D       | 0.16728  | 1.37E-04 | 3.12E-04 |
| C1GALT1C1 | 0.044449 | 3.14E-01 | 3.79E-01 |
| C1GALT1   | 0.256196 | 3.67E-09 | 1.47E-08 |
| C1QA      | 0.041691 | 3.45E-01 | 4.11E-01 |
| C1QBP     | 0.21811  | 5.79E-07 | 1.81E-06 |
| C1QB      | 0.066361 | 1.33E-01 | 1.77E-01 |
| C1QC      | 0.093641 | 3.36E-02 | 5.14E-02 |
| C1QL1     | 0.366695 | 7.77E-18 | 7.45E-17 |
| C1QL2     | -0.15524 | 4.07E-04 | 8.65E-04 |
| C1QL3     | -0.04647 | 2.93E-01 | 3.55E-01 |
| C1QL4     | 0.437221 | 1.86E-25 | 3.40E-24 |
| C1QTNF1   | -0.04915 | 2.66E-01 | 3.27E-01 |
| C1QTNF2   | -0.2201  | 4.54E-07 | 1.44E-06 |

|          |          |           |           |
|----------|----------|-----------|-----------|
| C1QTNF3  | -0.12138 | 5.81E-03  | 1.03E-02  |
| C1QTNF4  | -0.0961  | 2.92E-02  | 4.52E-02  |
| C1QTNF6  | 0.36888  | 4.80E-18  | 4.68E-17  |
| C1QTNF7  | -0.61635 | 3.35E-55  | 2.54E-53  |
| C1QTNF8  | -0.16045 | 2.56E-04  | 5.63E-04  |
| C1QTNF9B | -0.30311 | 2.10E-12  | 1.20E-11  |
| C1QTNF9  | -0.32618 | 3.13E-14  | 2.13E-13  |
| C1RL     | -0.15714 | 3.44E-04  | 7.41E-04  |
| C1R      | -0.07668 | 8.21E-02  | 1.16E-01  |
| C1S      | -0.06171 | 1.62E-01  | 2.12E-01  |
| C1orf100 | -0.06297 | 1.54E-01  | 2.02E-01  |
| C1orf101 | -0.51667 | 1.73E-36  | 6.50E-35  |
| C1orf103 | 0.299599 | 3.85E-12  | 2.13E-11  |
| C1orf104 | -0.12655 | 4.02E-03  | 7.33E-03  |
| C1orf105 | 0.275699 | 1.95E-10  | 9.04E-10  |
| C1orf106 | -0.09245 | 3.60E-02  | 5.46E-02  |
| C1orf107 | 0.038445 | 3.84E-01  | 4.50E-01  |
| C1orf109 | 0.233899 | 7.88E-08  | 2.72E-07  |
| C1orf110 | -0.20161 | 4.00E-06  | 1.13E-05  |
| C1orf111 | -0.16293 | 2.05E-04  | 4.56E-04  |
| C1orf112 | 0.657739 | 3.94E-65  | 3.81E-63  |
| C1orf113 | -0.03857 | 3.82E-01  | 4.49E-01  |
| C1orf114 | -0.04199 | 3.42E-01  | 4.07E-01  |
| C1orf115 | -0.10641 | 1.57E-02  | 2.57E-02  |
| C1orf116 | -0.59236 | 4.29E-50  | 2.91E-48  |
| C1orf122 | 0.153258 | 4.83E-04  | 1.01E-03  |
| C1orf123 | -0.14442 | 1.01E-03  | 2.04E-03  |
| C1orf124 | 0.169792 | 1.08E-04  | 2.51E-04  |
| C1orf125 | -0.04591 | 2.98E-01  | 3.62E-01  |
| C1orf126 | -0.03242 | 4.63E-01  | 5.29E-01  |
| C1orf127 | -0.30795 | 8.95E-13  | 5.28E-12  |
| C1orf128 | -0.13934 | 1.52E-03  | 2.97E-03  |
| C1orf129 | -0.29026 | 1.87E-11  | 9.56E-11  |
| C1orf130 | -0.26928 | 5.26E-10  | 2.32E-09  |
| C1orf131 | 0.175897 | 5.99E-05  | 1.44E-04  |
| C1orf133 | -0.38846 | 5.38E-20  | 6.28E-19  |
| C1orf135 | 0.807575 | 9.94E-120 | 2.31E-117 |
| C1orf141 | -0.23677 | 5.40E-08  | 1.89E-07  |
| C1orf144 | 0.208075 | 1.91E-06  | 5.60E-06  |
| C1orf146 | -0.04162 | 3.46E-01  | 4.12E-01  |
| C1orf14  | 0.098375 | 2.56E-02  | 4.00E-02  |
| C1orf150 | -0.2623  | 1.50E-09  | 6.29E-09  |
| C1orf151 | 0.151595 | 5.57E-04  | 1.16E-03  |
| C1orf152 | -0.33685 | 3.95E-15  | 2.91E-14  |

|          |          |          |          |
|----------|----------|----------|----------|
| C1orf156 | -0.02527 | 5.67E-01 | 6.27E-01 |
| C1orf157 | 0.058621 | 1.84E-01 | 2.37E-01 |
| C1orf158 | -0.29506 | 8.35E-12 | 4.44E-11 |
| C1orf159 | 0.111068 | 1.17E-02 | 1.96E-02 |
| C1orf161 | -0.08043 | 6.82E-02 | 9.79E-02 |
| C1orf162 | -0.13039 | 3.03E-03 | 5.64E-03 |
| C1orf163 | 0.471846 | 6.53E-30 | 1.67E-28 |
| C1orf168 | -0.29663 | 6.40E-12 | 3.45E-11 |
| C1orf170 | -0.0948  | 3.15E-02 | 4.84E-02 |
| C1orf172 | -0.06951 | 1.15E-01 | 1.56E-01 |
| C1orf173 | -0.25958 | 2.24E-09 | 9.19E-09 |
| C1orf174 | 0.297067 | 5.94E-12 | 3.22E-11 |
| C1orf175 | -0.29791 | 5.14E-12 | 2.80E-11 |
| C1orf177 | 0.024934 | 5.72E-01 | 6.32E-01 |
| C1orf180 | 0.095397 | 3.04E-02 | 4.69E-02 |
| C1orf182 | 0.298153 | 4.93E-12 | 2.70E-11 |
| C1orf183 | -0.27612 | 1.83E-10 | 8.48E-10 |
| C1orf185 | -0.00681 | 8.77E-01 | 9.01E-01 |
| C1orf186 | -0.42622 | 3.81E-24 | 6.31E-23 |
| C1orf187 | 0.275845 | 1.91E-10 | 8.85E-10 |
| C1orf189 | -0.23279 | 9.11E-08 | 3.12E-07 |
| C1orf190 | -0.25104 | 7.66E-09 | 2.96E-08 |
| C1orf192 | -0.25621 | 3.66E-09 | 1.47E-08 |
| C1orf194 | -0.26801 | 6.38E-10 | 2.79E-09 |
| C1orf198 | -0.40918 | 3.30E-22 | 4.62E-21 |
| C1orf200 | -0.04681 | 2.89E-01 | 3.52E-01 |
| C1orf201 | -0.18639 | 2.07E-05 | 5.32E-05 |
| C1orf203 | -0.2943  | 9.49E-12 | 5.02E-11 |
| C1orf204 | -0.27061 | 4.29E-10 | 1.92E-09 |
| C1orf210 | -0.34568 | 6.69E-16 | 5.35E-15 |
| C1orf212 | 0.237189 | 5.11E-08 | 1.79E-07 |
| C1orf213 | -0.13715 | 1.81E-03 | 3.50E-03 |
| C1orf216 | 0.128586 | 3.47E-03 | 6.39E-03 |
| C1orf21  | -0.46337 | 8.96E-29 | 2.12E-27 |
| C1orf220 | 0.055153 | 2.11E-01 | 2.68E-01 |
| C1orf223 | -0.09518 | 3.08E-02 | 4.75E-02 |
| C1orf226 | -0.19755 | 6.28E-06 | 1.73E-05 |
| C1orf227 | -0.10728 | 1.49E-02 | 2.45E-02 |
| C1orf228 | -0.19898 | 5.36E-06 | 1.49E-05 |
| C1orf229 | -0.19101 | 1.27E-05 | 3.36E-05 |
| C1orf230 | -0.24716 | 1.32E-08 | 4.95E-08 |
| C1orf25  | -0.15347 | 4.74E-04 | 9.98E-04 |
| C1orf26  | -0.2182  | 5.73E-07 | 1.79E-06 |
| C1orf27  | -0.15275 | 5.05E-04 | 1.06E-03 |

|           |          |          |          |
|-----------|----------|----------|----------|
| C1orf31   | 0.278664 | 1.22E-10 | 5.77E-10 |
| C1orf35   | -0.02765 | 5.31E-01 | 5.94E-01 |
| C1orf38   | 0.007896 | 8.58E-01 | 8.84E-01 |
| C1orf43   | 0.102828 | 1.96E-02 | 3.14E-02 |
| C1orf49   | -0.00617 | 8.89E-01 | 9.10E-01 |
| C1orf50   | -0.04798 | 2.77E-01 | 3.39E-01 |
| C1orf51   | 0.008903 | 8.40E-01 | 8.69E-01 |
| C1orf52   | 0.193754 | 9.50E-06 | 2.55E-05 |
| C1orf53   | -0.16132 | 2.37E-04 | 5.23E-04 |
| C1orf54   | 0.023142 | 6.00E-01 | 6.58E-01 |
| C1orf55   | 0.041935 | 3.42E-01 | 4.08E-01 |
| C1orf56   | -0.10949 | 1.29E-02 | 2.15E-02 |
| C1orf57   | 0.021742 | 6.23E-01 | 6.79E-01 |
| C1orf58   | 0.063678 | 1.49E-01 | 1.97E-01 |
| C1orf59   | 0.264342 | 1.11E-09 | 4.72E-09 |
| C1orf61   | 0.370056 | 3.69E-18 | 3.65E-17 |
| C1orf63   | -0.21417 | 9.32E-07 | 2.83E-06 |
| C1orf64   | -0.1367  | 1.88E-03 | 3.61E-03 |
| C1orf65   | -0.08526 | 5.32E-02 | 7.79E-02 |
| C1orf66   | -0.24234 | 2.56E-08 | 9.30E-08 |
| C1orf68   | 0.075086 | 8.87E-02 | 1.24E-01 |
| C1orf69   | -0.32167 | 7.33E-14 | 4.81E-13 |
| C1orf70   | -0.15246 | 5.17E-04 | 1.08E-03 |
| C1orf74   | 0.273389 | 2.80E-10 | 1.28E-09 |
| C1orf77   | 0.011044 | 8.03E-01 | 8.37E-01 |
| C1orf83   | 0.121287 | 5.85E-03 | 1.04E-02 |
| C1orf84   | -0.02525 | 5.67E-01 | 6.27E-01 |
| C1orf85   | 0.124527 | 4.65E-03 | 8.40E-03 |
| C1orf86   | -0.07694 | 8.11E-02 | 1.14E-01 |
| C1orf87   | -0.32458 | 4.24E-14 | 2.85E-13 |
| C1orf88   | -0.44531 | 1.88E-26 | 3.71E-25 |
| C1orf89   | -0.26395 | 1.17E-09 | 4.98E-09 |
| C1orf91   | -0.06637 | 1.33E-01 | 1.77E-01 |
| C1orf92   | -0.29656 | 6.48E-12 | 3.48E-11 |
| C1orf93   | -0.1865  | 2.05E-05 | 5.26E-05 |
| C1orf94   | 0.061471 | 1.64E-01 | 2.14E-01 |
| C1orf95   | -0.19914 | 5.27E-06 | 1.46E-05 |
| C1orf96   | 0.445641 | 1.71E-26 | 3.38E-25 |
| C1orf97   | -0.06718 | 1.28E-01 | 1.72E-01 |
| C1orf9    | 0.190158 | 1.40E-05 | 3.66E-05 |
| C20orf103 | -0.29675 | 6.27E-12 | 3.38E-11 |
| C20orf106 | -0.07165 | 1.04E-01 | 1.43E-01 |
| C20orf107 | 0.021525 | 6.26E-01 | 6.82E-01 |
| C20orf108 | -0.41814 | 3.26E-23 | 4.97E-22 |

|           |          |          |          |
|-----------|----------|----------|----------|
| C20orf111 | 0.239516 | 3.74E-08 | 1.34E-07 |
| C20orf112 | -0.10961 | 1.28E-02 | 2.13E-02 |
| C20orf114 | -0.19234 | 1.11E-05 | 2.94E-05 |
| C20orf117 | 0.057202 | 1.95E-01 | 2.49E-01 |
| C20orf118 | 0.089831 | 4.16E-02 | 6.23E-02 |
| C20orf11  | 0.057409 | 1.93E-01 | 2.48E-01 |
| C20orf123 | -0.1577  | 3.27E-04 | 7.08E-04 |
| C20orf12  | -0.22196 | 3.61E-07 | 1.16E-06 |
| C20orf132 | -0.35586 | 8.07E-17 | 7.04E-16 |
| C20orf134 | -0.17161 | 9.08E-05 | 2.13E-04 |
| C20orf135 | -0.1276  | 3.73E-03 | 6.83E-03 |
| C20orf141 | 0.337201 | 3.68E-15 | 2.72E-14 |
| C20orf144 | 0.038547 | 3.83E-01 | 4.49E-01 |
| C20orf151 | -0.20067 | 4.44E-06 | 1.25E-05 |
| C20orf152 | -0.00933 | 8.33E-01 | 8.62E-01 |
| C20orf160 | -0.33182 | 1.06E-14 | 7.50E-14 |
| C20orf165 | 0.00659  | 8.81E-01 | 9.04E-01 |
| C20orf166 | -0.05872 | 1.83E-01 | 2.36E-01 |
| C20orf173 | 0.050353 | 2.54E-01 | 3.15E-01 |
| C20orf177 | 0.076399 | 8.33E-02 | 1.17E-01 |
| C20orf185 | 0.036249 | 4.12E-01 | 4.78E-01 |
| C20orf186 | -0.03985 | 3.67E-01 | 4.33E-01 |
| C20orf191 | 0.071808 | 1.04E-01 | 1.42E-01 |
| C20orf194 | -0.41165 | 1.76E-22 | 2.51E-21 |
| C20orf195 | -0.08876 | 4.41E-02 | 6.58E-02 |
| C20orf196 | 0.054616 | 2.16E-01 | 2.73E-01 |
| C20orf197 | -0.2073  | 2.09E-06 | 6.09E-06 |
| C20orf199 | 0.090792 | 3.94E-02 | 5.94E-02 |
| C20orf200 | -0.32018 | 9.67E-14 | 6.27E-13 |
| C20orf201 | -0.05727 | 1.94E-01 | 2.49E-01 |
| C20orf202 | -0.18438 | 2.55E-05 | 6.46E-05 |
| C20orf203 | -0.01078 | 8.07E-01 | 8.41E-01 |
| C20orf20  | 0.434565 | 3.89E-25 | 6.93E-24 |
| C20orf24  | 0.422337 | 1.08E-23 | 1.72E-22 |
| C20orf26  | -0.23985 | 3.58E-08 | 1.28E-07 |
| C20orf27  | 0.19457  | 8.69E-06 | 2.35E-05 |
| C20orf29  | -0.07132 | 1.06E-01 | 1.45E-01 |
| C20orf30  | 0.023784 | 5.90E-01 | 6.48E-01 |
| C20orf3   | -0.02284 | 6.05E-01 | 6.62E-01 |
| C20orf43  | 0.107815 | 1.44E-02 | 2.37E-02 |
| C20orf46  | -0.05275 | 2.32E-01 | 2.90E-01 |
| C20orf4   | -0.05043 | 2.53E-01 | 3.14E-01 |
| C20orf54  | -0.13557 | 2.05E-03 | 3.92E-03 |
| C20orf56  | -0.47311 | 4.38E-30 | 1.13E-28 |

|           |          |          |          |
|-----------|----------|----------|----------|
| C20orf70  | -0.01743 | 6.93E-01 | 7.42E-01 |
| C20orf71  | 0.028672 | 5.16E-01 | 5.80E-01 |
| C20orf72  | 0.348659 | 3.63E-16 | 2.97E-15 |
| C20orf7   | 0.176474 | 5.66E-05 | 1.37E-04 |
| C20orf85  | -0.28344 | 5.70E-11 | 2.77E-10 |
| C20orf94  | 0.006686 | 8.80E-01 | 9.02E-01 |
| C20orf96  | -0.2212  | 3.97E-07 | 1.27E-06 |
| C21orf119 | 0.056897 | 1.97E-01 | 2.52E-01 |
| C21orf121 | -0.18416 | 2.61E-05 | 6.60E-05 |
| C21orf122 | -0.22199 | 3.60E-07 | 1.15E-06 |
| C21orf125 | -0.01445 | 7.44E-01 | 7.87E-01 |
| C21orf128 | -0.17481 | 6.66E-05 | 1.59E-04 |
| C21orf129 | -0.10437 | 1.78E-02 | 2.89E-02 |
| C21orf130 | -0.15713 | 3.44E-04 | 7.42E-04 |
| C21orf131 | -0.02583 | 5.59E-01 | 6.20E-01 |
| C21orf15  | -0.26787 | 6.52E-10 | 2.85E-09 |
| C21orf29  | -0.25555 | 4.02E-09 | 1.61E-08 |
| C21orf2   | -0.50032 | 5.64E-34 | 1.84E-32 |
| C21orf33  | -0.18182 | 3.31E-05 | 8.25E-05 |
| C21orf34  | -0.40814 | 4.30E-22 | 5.97E-21 |
| C21orf45  | 0.625867 | 2.36E-57 | 1.94E-55 |
| C21orf49  | -0.33476 | 5.97E-15 | 4.34E-14 |
| C21orf54  | -0.06213 | 1.59E-01 | 2.08E-01 |
| C21orf56  | 0.066665 | 1.31E-01 | 1.75E-01 |
| C21orf57  | -0.09691 | 2.79E-02 | 4.33E-02 |
| C21orf58  | 0.097527 | 2.69E-02 | 4.19E-02 |
| C21orf59  | -0.05598 | 2.05E-01 | 2.60E-01 |
| C21orf62  | -0.24482 | 1.82E-08 | 6.74E-08 |
| C21orf63  | -0.44156 | 5.48E-26 | 1.05E-24 |
| C21orf67  | -0.0618  | 1.61E-01 | 2.11E-01 |
| C21orf70  | 0.278129 | 1.33E-10 | 6.26E-10 |
| C21orf71  | -0.26582 | 8.88E-10 | 3.82E-09 |
| C21orf7   | -0.11743 | 7.64E-03 | 1.32E-02 |
| C21orf81  | -0.19725 | 6.49E-06 | 1.78E-05 |
| C21orf82  | -0.30284 | 2.20E-12 | 1.25E-11 |
| C21orf84  | -0.05679 | 1.98E-01 | 2.53E-01 |
| C21orf88  | 0.035225 | 4.25E-01 | 4.91E-01 |
| C21orf90  | -0.18892 | 1.59E-05 | 4.15E-05 |
| C21orf91  | 0.05923  | 1.80E-01 | 2.32E-01 |
| C21orf94  | -0.04635 | 2.94E-01 | 3.57E-01 |
| C21orf96  | 0.017617 | 6.90E-01 | 7.39E-01 |
| C21orf99  | 0.086409 | 5.00E-02 | 7.38E-02 |
| C22orf13  | -0.14356 | 1.09E-03 | 2.17E-03 |
| C22orf15  | -0.26012 | 2.07E-09 | 8.53E-09 |

|          |          |          |          |
|----------|----------|----------|----------|
| C22orf23 | -0.17861 | 4.58E-05 | 1.12E-04 |
| C22orf24 | 0.042745 | 3.33E-01 | 3.98E-01 |
| C22orf25 | -0.11902 | 6.85E-03 | 1.20E-02 |
| C22orf26 | -0.12852 | 3.48E-03 | 6.41E-03 |
| C22orf27 | -0.06875 | 1.19E-01 | 1.61E-01 |
| C22orf28 | 0.19786  | 6.07E-06 | 1.67E-05 |
| C22orf29 | -0.2573  | 3.12E-09 | 1.26E-08 |
| C22orf30 | 0.053893 | 2.22E-01 | 2.80E-01 |
| C22orf31 | -0.18318 | 2.89E-05 | 7.25E-05 |
| C22orf32 | -0.3351  | 5.58E-15 | 4.07E-14 |
| C22orf33 | -0.13162 | 2.76E-03 | 5.17E-03 |
| C22orf34 | -0.10609 | 1.60E-02 | 2.62E-02 |
| C22orf36 | -0.40668 | 6.22E-22 | 8.53E-21 |
| C22orf39 | -0.19787 | 6.06E-06 | 1.67E-05 |
| C22orf40 | -0.15326 | 4.83E-04 | 1.01E-03 |
| C22orf41 | -0.07584 | 8.55E-02 | 1.20E-01 |
| C22orf42 | -0.14499 | 9.67E-04 | 1.95E-03 |
| C22orf43 | -0.07795 | 7.72E-02 | 1.09E-01 |
| C22orf45 | -0.14858 | 7.19E-04 | 1.48E-03 |
| C22orf46 | -0.15481 | 4.22E-04 | 8.96E-04 |
| C22orf9  | 0.068255 | 1.22E-01 | 1.64E-01 |
| C2CD2L   | -0.34786 | 4.28E-16 | 3.48E-15 |
| C2CD2    | -0.20671 | 2.24E-06 | 6.49E-06 |
| C2CD3    | 0.087224 | 4.79E-02 | 7.08E-02 |
| C2CD4A   | 0.248403 | 1.11E-08 | 4.20E-08 |
| C2CD4B   | -0.0015  | 9.73E-01 | 9.79E-01 |
| C2CD4C   | 0.073822 | 9.42E-02 | 1.31E-01 |
| C2CD4D   | 0.000442 | 9.92E-01 | 9.94E-01 |
| C2orf14  | 0.051526 | 2.43E-01 | 3.03E-01 |
| C2orf15  | 0.01105  | 8.02E-01 | 8.37E-01 |
| C2orf16  | 0.159348 | 2.83E-04 | 6.17E-04 |
| C2orf18  | 0.31693  | 1.76E-13 | 1.12E-12 |
| C2orf24  | -0.38695 | 7.69E-20 | 8.83E-19 |
| C2orf27A | 0.073695 | 9.48E-02 | 1.31E-01 |
| C2orf28  | 0.038597 | 3.82E-01 | 4.49E-01 |
| C2orf29  | 0.197428 | 6.36E-06 | 1.75E-05 |
| C2orf34  | -0.21387 | 9.66E-07 | 2.93E-06 |
| C2orf39  | -0.17813 | 4.80E-05 | 1.17E-04 |
| C2orf3   | 0.266707 | 7.77E-10 | 3.37E-09 |
| C2orf40  | -0.49893 | 9.06E-34 | 2.92E-32 |
| C2orf42  | -0.06131 | 1.65E-01 | 2.15E-01 |
| C2orf43  | 0.298591 | 4.58E-12 | 2.51E-11 |
| C2orf44  | 0.381882 | 2.52E-19 | 2.77E-18 |
| C2orf47  | 0.344413 | 8.67E-16 | 6.84E-15 |



|         |          |          |          |
|---------|----------|----------|----------|
| C2orf48 | 0.397521 | 6.06E-21 | 7.68E-20 |
| C2orf49 | 0.440475 | 7.44E-26 | 1.41E-24 |
| C2orf50 | -0.10497 | 1.72E-02 | 2.79E-02 |
| C2orf51 | 0.14513  | 9.57E-04 | 1.93E-03 |
| C2orf52 | 0.141525 | 1.28E-03 | 2.53E-03 |
| C2orf53 | 0.038518 | 3.83E-01 | 4.49E-01 |
| C2orf54 | -0.19034 | 1.37E-05 | 3.59E-05 |
| C2orf55 | -0.26872 | 5.73E-10 | 2.52E-09 |
| C2orf56 | 0.134197 | 2.27E-03 | 4.31E-03 |
| C2orf57 | -0.04559 | 3.02E-01 | 3.65E-01 |
| C2orf58 | -0.4512  | 3.40E-27 | 7.14E-26 |
| C2orf60 | 0.080698 | 6.73E-02 | 9.67E-02 |
| C2orf61 | 0.092084 | 3.67E-02 | 5.56E-02 |
| C2orf62 | -0.23573 | 6.20E-08 | 2.16E-07 |
| C2orf63 | -0.34883 | 3.51E-16 | 2.87E-15 |
| C2orf64 | -0.01931 | 6.62E-01 | 7.14E-01 |
| C2orf65 | -0.13941 | 1.52E-03 | 2.96E-03 |
| C2orf66 | -0.03294 | 4.56E-01 | 5.22E-01 |
| C2orf67 | -0.34254 | 1.27E-15 | 9.78E-15 |
| C2orf68 | -0.05292 | 2.31E-01 | 2.89E-01 |
| C2orf69 | 0.413458 | 1.10E-22 | 1.60E-21 |
| C2orf70 | -0.00757 | 8.64E-01 | 8.89E-01 |
| C2orf71 | -0.36539 | 1.03E-17 | 9.82E-17 |
| C2orf72 | 0.159444 | 2.80E-04 | 6.12E-04 |
| C2orf73 | -0.27836 | 1.28E-10 | 6.03E-10 |
| C2orf74 | -0.23093 | 1.16E-07 | 3.94E-07 |
| C2orf76 | 0.112034 | 1.10E-02 | 1.85E-02 |
| C2orf77 | -0.15619 | 3.74E-04 | 8.01E-04 |
| C2orf78 | 0.207382 | 2.07E-06 | 6.03E-06 |
| C2orf79 | -0.05538 | 2.10E-01 | 2.66E-01 |
| C2orf7  | 0.177924 | 4.90E-05 | 1.19E-04 |
| C2orf80 | 0.148692 | 7.12E-04 | 1.46E-03 |
| C2orf81 | -0.14746 | 7.89E-04 | 1.61E-03 |
| C2orf82 | 0.17993  | 4.01E-05 | 9.87E-05 |
| C2orf83 | 0.132974 | 2.50E-03 | 4.70E-03 |
| C2orf84 | 0.075054 | 8.88E-02 | 1.24E-01 |
| C2orf85 | -0.11113 | 1.16E-02 | 1.95E-02 |
| C2orf86 | -0.05685 | 1.98E-01 | 2.52E-01 |
| C2orf88 | 0.051962 | 2.39E-01 | 2.99E-01 |
| C2orf89 | -0.15802 | 3.18E-04 | 6.89E-04 |
| C2      | -0.32331 | 5.38E-14 | 3.58E-13 |
| C3AR1   | -0.00809 | 8.55E-01 | 8.81E-01 |
| C3P1    | 0.141322 | 1.30E-03 | 2.57E-03 |
| C3orf10 | -0.01678 | 7.04E-01 | 7.52E-01 |

|         |          |          |          |
|---------|----------|----------|----------|
| C3orf14 | 0.035306 | 4.24E-01 | 4.90E-01 |
| C3orf15 | -0.29439 | 9.35E-12 | 4.95E-11 |
| C3orf16 | -0.16803 | 1.27E-04 | 2.93E-04 |
| C3orf17 | 0.249047 | 1.01E-08 | 3.86E-08 |
| C3orf18 | -0.40972 | 2.88E-22 | 4.05E-21 |
| C3orf19 | -0.31382 | 3.11E-13 | 1.93E-12 |
| C3orf1  | 0.28557  | 4.03E-11 | 1.98E-10 |
| C3orf20 | 0.071563 | 1.05E-01 | 1.43E-01 |
| C3orf21 | 0.355159 | 9.35E-17 | 8.12E-16 |
| C3orf22 | -0.01164 | 7.92E-01 | 8.28E-01 |
| C3orf23 | -0.14601 | 8.89E-04 | 1.80E-03 |
| C3orf24 | -0.01432 | 7.46E-01 | 7.89E-01 |
| C3orf26 | 0.514032 | 4.50E-36 | 1.65E-34 |
| C3orf27 | -0.02507 | 5.70E-01 | 6.30E-01 |
| C3orf30 | -0.00977 | 8.25E-01 | 8.56E-01 |
| C3orf31 | -0.08687 | 4.88E-02 | 7.21E-02 |
| C3orf32 | -0.16082 | 2.48E-04 | 5.46E-04 |
| C3orf33 | 0.019105 | 6.65E-01 | 7.17E-01 |
| C3orf34 | 0.142023 | 1.23E-03 | 2.44E-03 |
| C3orf35 | -0.24604 | 1.54E-08 | 5.74E-08 |
| C3orf36 | -0.24145 | 2.88E-08 | 1.04E-07 |
| C3orf37 | 0.357106 | 6.19E-17 | 5.48E-16 |
| C3orf38 | 0.216274 | 7.24E-07 | 2.23E-06 |
| C3orf39 | 0.102264 | 2.03E-02 | 3.24E-02 |
| C3orf42 | -0.32047 | 9.16E-14 | 5.96E-13 |
| C3orf43 | 0.075577 | 8.66E-02 | 1.21E-01 |
| C3orf45 | -0.08766 | 4.68E-02 | 6.94E-02 |
| C3orf47 | -0.30868 | 7.85E-13 | 4.66E-12 |
| C3orf48 | -0.0979  | 2.63E-02 | 4.11E-02 |
| C3orf49 | -0.08395 | 5.69E-02 | 8.30E-02 |
| C3orf50 | -0.03703 | 4.02E-01 | 4.68E-01 |
| C3orf51 | -0.05084 | 2.49E-01 | 3.10E-01 |
| C3orf52 | -0.02864 | 5.17E-01 | 5.81E-01 |
| C3orf54 | -0.25858 | 2.59E-09 | 1.06E-08 |
| C3orf55 | -0.03627 | 4.11E-01 | 4.78E-01 |
| C3orf57 | 0.142842 | 1.15E-03 | 2.29E-03 |
| C3orf58 | -0.01432 | 7.46E-01 | 7.89E-01 |
| C3orf59 | 0.249924 | 8.96E-09 | 3.43E-08 |
| C3orf62 | -0.41566 | 6.24E-23 | 9.26E-22 |
| C3orf63 | 0.033363 | 4.50E-01 | 5.16E-01 |
| C3orf64 | -0.10386 | 1.84E-02 | 2.97E-02 |
| C3orf65 | 0.172058 | 8.69E-05 | 2.04E-04 |
| C3orf66 | 0.200661 | 4.45E-06 | 1.25E-05 |
| C3orf67 | 0.344813 | 7.99E-16 | 6.34E-15 |

|         |          |          |          |
|---------|----------|----------|----------|
| C3orf70 | -0.13901 | 1.57E-03 | 3.05E-03 |
| C3orf71 | -0.2136  | 9.97E-07 | 3.02E-06 |
| C3orf72 | 0.224995 | 2.47E-07 | 8.09E-07 |
| C3orf74 | 0.064996 | 1.41E-01 | 1.87E-01 |
| C3orf75 | 0.092428 | 3.60E-02 | 5.47E-02 |
| C3orf77 | 0.088598 | 4.45E-02 | 6.63E-02 |
| C3orf79 | -0.00874 | 8.43E-01 | 8.72E-01 |
| C3      | -0.36166 | 2.33E-17 | 2.16E-16 |
| C4A     | -0.43525 | 3.22E-25 | 5.78E-24 |
| C4BPA   | -0.41223 | 1.51E-22 | 2.18E-21 |
| C4BPB   | -0.01389 | 7.53E-01 | 7.95E-01 |
| C4orf10 | -0.18499 | 2.40E-05 | 6.09E-05 |
| C4orf12 | -0.27207 | 3.43E-10 | 1.55E-09 |
| C4orf14 | -0.00917 | 8.36E-01 | 8.65E-01 |
| C4orf17 | 0.059125 | 1.80E-01 | 2.33E-01 |
| C4orf19 | -0.18308 | 2.92E-05 | 7.32E-05 |
| C4orf21 | 0.437957 | 1.51E-25 | 2.79E-24 |
| C4orf22 | -0.19351 | 9.75E-06 | 2.61E-05 |
| C4orf23 | -0.21458 | 8.87E-07 | 2.70E-06 |
| C4orf26 | 0.238453 | 4.32E-08 | 1.53E-07 |
| C4orf27 | 0.185438 | 2.29E-05 | 5.83E-05 |
| C4orf29 | 0.083381 | 5.86E-02 | 8.53E-02 |
| C4orf31 | -0.43025 | 1.28E-24 | 2.18E-23 |
| C4orf32 | -0.016   | 7.17E-01 | 7.64E-01 |
| C4orf33 | -0.04071 | 3.56E-01 | 4.22E-01 |
| C4orf34 | -0.09993 | 2.33E-02 | 3.69E-02 |
| C4orf35 | 0.085383 | 5.28E-02 | 7.75E-02 |
| C4orf36 | 0.055515 | 2.08E-01 | 2.64E-01 |
| C4orf37 | -0.09993 | 2.33E-02 | 3.69E-02 |
| C4orf38 | -0.15857 | 3.03E-04 | 6.58E-04 |
| C4orf39 | -0.12465 | 4.61E-03 | 8.33E-03 |
| C4orf3  | -0.00562 | 8.99E-01 | 9.18E-01 |
| C4orf40 | 0.06403  | 1.47E-01 | 1.94E-01 |
| C4orf41 | -0.10568 | 1.64E-02 | 2.68E-02 |
| C4orf42 | -0.07298 | 9.80E-02 | 1.35E-01 |
| C4orf43 | 0.417325 | 4.04E-23 | 6.11E-22 |
| C4orf44 | -0.27903 | 1.15E-10 | 5.45E-10 |
| C4orf45 | -0.09602 | 2.93E-02 | 4.54E-02 |
| C4orf46 | 0.622506 | 1.38E-56 | 1.11E-54 |
| C4orf47 | -0.02558 | 5.62E-01 | 6.23E-01 |
| C4orf48 | 0.1915   | 1.21E-05 | 3.20E-05 |
| C4orf49 | -0.01953 | 6.58E-01 | 7.11E-01 |
| C4orf50 | 0.109632 | 1.28E-02 | 2.13E-02 |
| C4orf51 | 0.134382 | 2.24E-03 | 4.25E-03 |

|          |          |          |          |
|----------|----------|----------|----------|
| C4orf52  | 0.041443 | 3.48E-01 | 4.14E-01 |
| C4orf6   | 0.093026 | 3.48E-02 | 5.30E-02 |
| C4orf7   | -0.20174 | 3.94E-06 | 1.11E-05 |
| C5AR1    | 0.015933 | 7.18E-01 | 7.65E-01 |
| C5orf13  | -0.07089 | 1.08E-01 | 1.48E-01 |
| C5orf15  | 0.1468   | 8.33E-04 | 1.69E-03 |
| C5orf20  | -0.15604 | 3.79E-04 | 8.11E-04 |
| C5orf22  | 0.330159 | 1.46E-14 | 1.02E-13 |
| C5orf23  | -0.2245  | 2.63E-07 | 8.58E-07 |
| C5orf24  | -0.06101 | 1.67E-01 | 2.17E-01 |
| C5orf25  | -0.04926 | 2.65E-01 | 3.26E-01 |
| C5orf27  | -0.06502 | 1.41E-01 | 1.87E-01 |
| C5orf28  | 0.238571 | 4.25E-08 | 1.51E-07 |
| C5orf30  | 0.116786 | 7.98E-03 | 1.38E-02 |
| C5orf32  | -0.1958  | 7.61E-06 | 2.07E-05 |
| C5orf33  | 0.205441 | 2.59E-06 | 7.45E-06 |
| C5orf34  | 0.678705 | 8.73E-71 | 9.28E-69 |
| C5orf35  | 0.019543 | 6.58E-01 | 7.11E-01 |
| C5orf36  | -0.12828 | 3.54E-03 | 6.52E-03 |
| C5orf38  | -0.43704 | 1.96E-25 | 3.58E-24 |
| C5orf39  | -0.11385 | 9.71E-03 | 1.65E-02 |
| C5orf40  | 0.051193 | 2.46E-01 | 3.06E-01 |
| C5orf41  | -0.39708 | 6.76E-21 | 8.51E-20 |
| C5orf42  | -0.10442 | 1.78E-02 | 2.88E-02 |
| C5orf43  | 0.174128 | 7.12E-05 | 1.70E-04 |
| C5orf44  | 0.062445 | 1.57E-01 | 2.06E-01 |
| C5orf45  | -0.41496 | 7.48E-23 | 1.10E-21 |
| C5orf46  | 0.370375 | 3.44E-18 | 3.41E-17 |
| C5orf47  | -0.07658 | 8.25E-02 | 1.16E-01 |
| C5orf48  | 0.070489 | 1.10E-01 | 1.50E-01 |
| C5orf49  | -0.43942 | 1.00E-25 | 1.88E-24 |
| C5orf4   | -0.22215 | 3.53E-07 | 1.13E-06 |
| C5orf51  | 0.125581 | 4.31E-03 | 7.83E-03 |
| C5orf52  | -0.05805 | 1.88E-01 | 2.42E-01 |
| C5orf53  | -0.53217 | 5.34E-39 | 2.33E-37 |
| C5orf54  | -0.03004 | 4.96E-01 | 5.61E-01 |
| C5orf55  | 0.028434 | 5.20E-01 | 5.84E-01 |
| C5orf56  | -0.17073 | 9.87E-05 | 2.30E-04 |
| C5orf58  | 0.06429  | 1.45E-01 | 1.92E-01 |
| C5orf60  | 0.031821 | 4.71E-01 | 5.37E-01 |
| C5orf62  | 0.020298 | 6.46E-01 | 7.00E-01 |
| C5       | -0.21872 | 5.38E-07 | 1.69E-06 |
| C6orf103 | -0.31367 | 3.20E-13 | 1.98E-12 |
| C6orf105 | -0.0584  | 1.86E-01 | 2.39E-01 |

|          |          |          |          |
|----------|----------|----------|----------|
| C6orf106 | -0.15865 | 3.01E-04 | 6.54E-04 |
| C6orf108 | -0.01559 | 7.24E-01 | 7.70E-01 |
| C6orf10  | 0.049976 | 2.58E-01 | 3.19E-01 |
| C6orf114 | -0.02438 | 5.81E-01 | 6.40E-01 |
| C6orf115 | 0.378811 | 5.11E-19 | 5.44E-18 |
| C6orf118 | -0.26573 | 9.00E-10 | 3.87E-09 |
| C6orf120 | 0.256078 | 3.73E-09 | 1.49E-08 |
| C6orf122 | 0.068503 | 1.21E-01 | 1.63E-01 |
| C6orf123 | -0.17696 | 5.39E-05 | 1.31E-04 |
| C6orf124 | -0.14067 | 1.37E-03 | 2.70E-03 |
| C6orf125 | 0.074184 | 9.26E-02 | 1.29E-01 |
| C6orf126 | 0.081166 | 6.57E-02 | 9.47E-02 |
| C6orf127 | 0.084889 | 5.42E-02 | 7.94E-02 |
| C6orf129 | 0.370692 | 3.21E-18 | 3.19E-17 |
| C6orf130 | -0.01495 | 7.35E-01 | 7.79E-01 |
| C6orf132 | -0.11972 | 6.53E-03 | 1.15E-02 |
| C6orf134 | -0.09311 | 3.47E-02 | 5.28E-02 |
| C6orf136 | 0.066263 | 1.33E-01 | 1.78E-01 |
| C6orf138 | -0.39369 | 1.54E-20 | 1.88E-19 |
| C6orf141 | 0.124769 | 4.57E-03 | 8.26E-03 |
| C6orf142 | 0.093262 | 3.44E-02 | 5.24E-02 |
| C6orf145 | -0.11558 | 8.66E-03 | 1.48E-02 |
| C6orf146 | -0.07581 | 8.57E-02 | 1.20E-01 |
| C6orf147 | 0.07935  | 7.20E-02 | 1.03E-01 |
| C6orf150 | 0.560594 | 5.89E-44 | 3.30E-42 |
| C6orf153 | 0.36605  | 8.96E-18 | 8.55E-17 |
| C6orf154 | -0.19083 | 1.30E-05 | 3.42E-05 |
| C6orf155 | -0.28808 | 2.67E-11 | 1.35E-10 |
| C6orf15  | 0.09354  | 3.38E-02 | 5.17E-02 |
| C6orf162 | 0.197909 | 6.03E-06 | 1.66E-05 |
| C6orf163 | -0.14631 | 8.68E-04 | 1.76E-03 |
| C6orf164 | -0.21503 | 8.40E-07 | 2.57E-06 |
| C6orf165 | -0.16968 | 1.09E-04 | 2.53E-04 |
| C6orf167 | 0.565077 | 8.79E-45 | 5.09E-43 |
| C6orf168 | -0.1056  | 1.65E-02 | 2.69E-02 |
| C6orf170 | 0.020699 | 6.39E-01 | 6.94E-01 |
| C6orf174 | -0.0688  | 1.19E-01 | 1.61E-01 |
| C6orf176 | 0.076187 | 8.41E-02 | 1.18E-01 |
| C6orf182 | 0.508984 | 2.73E-35 | 9.54E-34 |
| C6orf186 | -0.11564 | 8.62E-03 | 1.48E-02 |
| C6orf191 | 0.038954 | 3.78E-01 | 4.44E-01 |
| C6orf192 | 0.022327 | 6.13E-01 | 6.70E-01 |
| C6orf195 | 0.289918 | 1.97E-11 | 1.01E-10 |
| C6orf1   | -0.13766 | 1.74E-03 | 3.37E-03 |

|          |          |          |          |
|----------|----------|----------|----------|
| C6orf201 | -0.3222  | 6.64E-14 | 4.38E-13 |
| C6orf203 | -0.14492 | 9.73E-04 | 1.96E-03 |
| C6orf204 | 0.079294 | 7.22E-02 | 1.03E-01 |
| C6orf208 | -0.05763 | 1.92E-01 | 2.46E-01 |
| C6orf211 | 0.058819 | 1.83E-01 | 2.35E-01 |
| C6orf217 | -0.38606 | 9.49E-20 | 1.08E-18 |
| C6orf218 | 0.219452 | 4.92E-07 | 1.55E-06 |
| C6orf221 | -0.04099 | 3.53E-01 | 4.19E-01 |
| C6orf222 | -0.02194 | 6.19E-01 | 6.75E-01 |
| C6orf223 | 0.108209 | 1.40E-02 | 2.32E-02 |
| C6orf225 | -0.09505 | 3.10E-02 | 4.78E-02 |
| C6orf226 | -0.08858 | 4.45E-02 | 6.64E-02 |
| C6orf227 | -0.1667  | 1.44E-04 | 3.28E-04 |
| C6orf25  | -0.14173 | 1.26E-03 | 2.49E-03 |
| C6orf26  | -0.15847 | 3.06E-04 | 6.64E-04 |
| C6orf27  | -0.22938 | 1.42E-07 | 4.77E-07 |
| C6orf35  | 0.043942 | 3.20E-01 | 3.84E-01 |
| C6orf41  | -0.27676 | 1.65E-10 | 7.71E-10 |
| C6orf47  | -0.25324 | 5.60E-09 | 2.20E-08 |
| C6orf48  | -0.13371 | 2.36E-03 | 4.46E-03 |
| C6orf52  | 0.085839 | 5.16E-02 | 7.58E-02 |
| C6orf57  | 0.098621 | 2.52E-02 | 3.95E-02 |
| C6orf58  | -0.06358 | 1.50E-01 | 1.97E-01 |
| C6orf59  | -0.20046 | 4.54E-06 | 1.28E-05 |
| C6orf62  | -0.02731 | 5.36E-01 | 5.99E-01 |
| C6orf64  | -0.15934 | 2.83E-04 | 6.17E-04 |
| C6orf70  | -0.18699 | 1.95E-05 | 5.01E-05 |
| C6orf72  | 0.040231 | 3.62E-01 | 4.29E-01 |
| C6orf81  | -0.03    | 4.97E-01 | 5.62E-01 |
| C6orf89  | -0.33123 | 1.19E-14 | 8.37E-14 |
| C6orf94  | -0.03503 | 4.28E-01 | 4.94E-01 |
| C6orf97  | -0.29804 | 5.03E-12 | 2.75E-11 |
| C6       | -0.39352 | 1.60E-20 | 1.96E-19 |
| C7orf10  | 0.028628 | 5.17E-01 | 5.81E-01 |
| C7orf11  | 0.33884  | 2.66E-15 | 1.99E-14 |
| C7orf13  | 0.086738 | 4.91E-02 | 7.26E-02 |
| C7orf16  | -0.05786 | 1.90E-01 | 2.44E-01 |
| C7orf23  | -0.43407 | 4.46E-25 | 7.90E-24 |
| C7orf25  | 0.278673 | 1.22E-10 | 5.76E-10 |
| C7orf26  | -0.0877  | 4.67E-02 | 6.93E-02 |
| C7orf27  | 0.001186 | 9.79E-01 | 9.84E-01 |
| C7orf28A | 0.308069 | 8.75E-13 | 5.18E-12 |
| C7orf28B | 0.236203 | 5.82E-08 | 2.03E-07 |
| C7orf29  | 0.14399  | 1.05E-03 | 2.10E-03 |

|          |          |          |          |
|----------|----------|----------|----------|
| C7orf30  | 0.187707 | 1.81E-05 | 4.68E-05 |
| C7orf31  | -0.0746  | 9.08E-02 | 1.26E-01 |
| C7orf33  | 0.105678 | 1.64E-02 | 2.68E-02 |
| C7orf34  | -0.03721 | 3.99E-01 | 4.66E-01 |
| C7orf36  | 0.147681 | 7.75E-04 | 1.58E-03 |
| C7orf40  | 0.187564 | 1.83E-05 | 4.74E-05 |
| C7orf41  | -0.55357 | 1.09E-42 | 5.77E-41 |
| C7orf42  | -0.12529 | 4.41E-03 | 7.98E-03 |
| C7orf43  | 0.056681 | 1.99E-01 | 2.54E-01 |
| C7orf44  | 0.262912 | 1.37E-09 | 5.77E-09 |
| C7orf45  | -0.11735 | 7.68E-03 | 1.33E-02 |
| C7orf46  | -0.09128 | 3.84E-02 | 5.79E-02 |
| C7orf47  | 0.156473 | 3.65E-04 | 7.83E-04 |
| C7orf49  | 0.470854 | 8.90E-30 | 2.25E-28 |
| C7orf4   | -0.05629 | 2.02E-01 | 2.58E-01 |
| C7orf50  | 0.055364 | 2.10E-01 | 2.66E-01 |
| C7orf51  | 0.16489  | 1.71E-04 | 3.85E-04 |
| C7orf52  | 0.129907 | 3.14E-03 | 5.83E-03 |
| C7orf53  | 0.0285   | 5.19E-01 | 5.83E-01 |
| C7orf54  | -0.08695 | 4.86E-02 | 7.18E-02 |
| C7orf55  | -0.06906 | 1.18E-01 | 1.59E-01 |
| C7orf57  | -0.29317 | 1.15E-11 | 6.01E-11 |
| C7orf58  | -0.29268 | 1.25E-11 | 6.49E-11 |
| C7orf59  | 0.02661  | 5.47E-01 | 6.09E-01 |
| C7orf60  | 0.005166 | 9.07E-01 | 9.25E-01 |
| C7orf61  | 0.219438 | 4.93E-07 | 1.55E-06 |
| C7orf63  | -0.2515  | 7.17E-09 | 2.78E-08 |
| C7orf64  | 0.069354 | 1.16E-01 | 1.57E-01 |
| C7orf65  | 0.166393 | 1.49E-04 | 3.38E-04 |
| C7orf66  | 0.075892 | 8.53E-02 | 1.20E-01 |
| C7orf68  | 0.498236 | 1.15E-33 | 3.65E-32 |
| C7orf69  | 0.083596 | 5.80E-02 | 8.44E-02 |
| C7orf70  | 0.371346 | 2.77E-18 | 2.77E-17 |
| C7orf71  | 0.018545 | 6.75E-01 | 7.26E-01 |
| C7orf72  | 0.013082 | 7.67E-01 | 8.06E-01 |
| C7       | -0.5067  | 6.11E-35 | 2.08E-33 |
| C8A      | -0.07932 | 7.21E-02 | 1.03E-01 |
| C8B      | -0.22162 | 3.77E-07 | 1.21E-06 |
| C8G      | 0.020536 | 6.42E-01 | 6.96E-01 |
| C8ORFK29 | 0.098982 | 2.47E-02 | 3.88E-02 |
| C8orf12  | -0.17581 | 6.03E-05 | 1.45E-04 |
| C8orf22  | -0.08164 | 6.41E-02 | 9.26E-02 |
| C8orf30A | 0.004383 | 9.21E-01 | 9.37E-01 |
| C8orf31  | -0.01653 | 7.08E-01 | 7.56E-01 |

|          |          |          |          |
|----------|----------|----------|----------|
| C8orf33  | 0.205977 | 2.43E-06 | 7.02E-06 |
| C8orf34  | -0.47713 | 1.23E-30 | 3.29E-29 |
| C8orf37  | 0.089729 | 4.18E-02 | 6.27E-02 |
| C8orf38  | 0.005514 | 9.01E-01 | 9.20E-01 |
| C8orf39  | 0.100807 | 2.21E-02 | 3.51E-02 |
| C8orf40  | -0.06152 | 1.63E-01 | 2.13E-01 |
| C8orf41  | 0.127808 | 3.67E-03 | 6.73E-03 |
| C8orf42  | -0.40786 | 4.62E-22 | 6.39E-21 |
| C8orf44  | -0.04414 | 3.17E-01 | 3.82E-01 |
| C8orf45  | 0.046552 | 2.92E-01 | 3.54E-01 |
| C8orf46  | -0.25227 | 6.43E-09 | 2.51E-08 |
| C8orf47  | -0.01559 | 7.24E-01 | 7.70E-01 |
| C8orf48  | -0.26645 | 8.08E-10 | 3.50E-09 |
| C8orf4   | -0.21174 | 1.24E-06 | 3.73E-06 |
| C8orf51  | 0.086977 | 4.85E-02 | 7.17E-02 |
| C8orf55  | -0.22039 | 4.38E-07 | 1.39E-06 |
| C8orf56  | -0.01639 | 7.11E-01 | 7.58E-01 |
| C8orf58  | -0.16033 | 2.59E-04 | 5.68E-04 |
| C8orf59  | 0.187777 | 1.79E-05 | 4.65E-05 |
| C8orf71  | 0.034005 | 4.41E-01 | 5.08E-01 |
| C8orf73  | -0.16462 | 1.75E-04 | 3.94E-04 |
| C8orf74  | 0.110182 | 1.24E-02 | 2.06E-02 |
| C8orf75  | 0.180767 | 3.69E-05 | 9.13E-05 |
| C8orf76  | 0.353858 | 1.23E-16 | 1.05E-15 |
| C8orf77  | -0.14355 | 1.09E-03 | 2.17E-03 |
| C8orf79  | -0.3757  | 1.04E-18 | 1.08E-17 |
| C8orf80  | -0.09731 | 2.72E-02 | 4.24E-02 |
| C8orf83  | -0.1395  | 1.51E-03 | 2.94E-03 |
| C8orf84  | -0.2616  | 1.66E-09 | 6.94E-09 |
| C8orf85  | -0.32037 | 9.33E-14 | 6.06E-13 |
| C8orf86  | 0.098564 | 2.53E-02 | 3.97E-02 |
| C9orf100 | 0.64141  | 4.96E-61 | 4.41E-59 |
| C9orf102 | 0.023177 | 6.00E-01 | 6.57E-01 |
| C9orf103 | -0.30148 | 2.78E-12 | 1.56E-11 |
| C9orf106 | -0.21563 | 7.83E-07 | 2.41E-06 |
| C9orf109 | 0.186953 | 1.95E-05 | 5.03E-05 |
| C9orf110 | 0.149248 | 6.79E-04 | 1.40E-03 |
| C9orf114 | 0.013901 | 7.53E-01 | 7.94E-01 |
| C9orf116 | -0.18432 | 2.57E-05 | 6.49E-05 |
| C9orf117 | -0.28943 | 2.14E-11 | 1.09E-10 |
| C9orf119 | 0.093548 | 3.38E-02 | 5.16E-02 |
| C9orf11  | -0.05786 | 1.90E-01 | 2.44E-01 |
| C9orf122 | -0.07322 | 9.69E-02 | 1.34E-01 |
| C9orf123 | 0.079423 | 7.17E-02 | 1.02E-01 |



|           |          |          |          |
|-----------|----------|----------|----------|
| C9orf125  | -0.08357 | 5.81E-02 | 8.45E-02 |
| C9orf128  | -0.28667 | 3.37E-11 | 1.67E-10 |
| C9orf129  | 0.025962 | 5.57E-01 | 6.18E-01 |
| C9orf130  | -0.32327 | 5.42E-14 | 3.61E-13 |
| C9orf131  | -0.24709 | 1.33E-08 | 4.99E-08 |
| C9orf135  | -0.32359 | 5.11E-14 | 3.40E-13 |
| C9orf139  | -0.15561 | 3.94E-04 | 8.40E-04 |
| C9orf140  | 0.677417 | 2.00E-70 | 2.11E-68 |
| C9orf142  | -0.03145 | 4.76E-01 | 5.42E-01 |
| C9orf144B | -0.10423 | 1.80E-02 | 2.91E-02 |
| C9orf144  | -0.07827 | 7.60E-02 | 1.08E-01 |
| C9orf150  | -0.19172 | 1.18E-05 | 3.13E-05 |
| C9orf152  | -0.43782 | 1.57E-25 | 2.89E-24 |
| C9orf153  | -0.02555 | 5.63E-01 | 6.23E-01 |
| C9orf156  | -0.36    | 3.33E-17 | 3.05E-16 |
| C9orf163  | -0.06264 | 1.56E-01 | 2.04E-01 |
| C9orf167  | -0.19086 | 1.29E-05 | 3.41E-05 |
| C9orf169  | 0.00328  | 9.41E-01 | 9.54E-01 |
| C9orf16   | 0.032953 | 4.56E-01 | 5.22E-01 |
| C9orf170  | 0.020601 | 6.41E-01 | 6.95E-01 |
| C9orf171  | -0.26542 | 9.42E-10 | 4.04E-09 |
| C9orf172  | 0.027363 | 5.36E-01 | 5.98E-01 |
| C9orf173  | -0.08498 | 5.40E-02 | 7.90E-02 |
| C9orf21   | 0.122406 | 5.41E-03 | 9.65E-03 |
| C9orf23   | 0.094494 | 3.20E-02 | 4.92E-02 |
| C9orf24   | -0.26788 | 6.50E-10 | 2.85E-09 |
| C9orf25   | 0.097808 | 2.64E-02 | 4.13E-02 |
| C9orf27   | 0.0942   | 3.26E-02 | 4.99E-02 |
| C9orf30   | 0.487193 | 4.70E-32 | 1.37E-30 |
| C9orf37   | -0.01406 | 7.50E-01 | 7.92E-01 |
| C9orf3    | -0.1288  | 3.41E-03 | 6.29E-03 |
| C9orf40   | 0.55463  | 7.08E-43 | 3.76E-41 |
| C9orf41   | 0.161669 | 2.29E-04 | 5.08E-04 |
| C9orf43   | 0.004384 | 9.21E-01 | 9.37E-01 |
| C9orf44   | -0.17562 | 6.15E-05 | 1.48E-04 |
| C9orf45   | -0.32154 | 7.51E-14 | 4.92E-13 |
| C9orf46   | 0.237384 | 4.98E-08 | 1.75E-07 |
| C9orf47   | -0.14545 | 9.32E-04 | 1.88E-03 |
| C9orf4    | 0.19779  | 6.11E-06 | 1.68E-05 |
| C9orf50   | -0.13938 | 1.52E-03 | 2.97E-03 |
| C9orf53   | 0.158034 | 3.18E-04 | 6.89E-04 |
| C9orf57   | 0.041657 | 3.45E-01 | 4.11E-01 |
| C9orf5    | -0.26354 | 1.25E-09 | 5.28E-09 |
| C9orf64   | -0.00094 | 9.83E-01 | 9.87E-01 |

|         |          |          |          |
|---------|----------|----------|----------|
| C9orf66 | -0.23012 | 1.29E-07 | 4.35E-07 |
| C9orf68 | -0.42495 | 5.35E-24 | 8.77E-23 |
| C9orf69 | 0.154949 | 4.17E-04 | 8.86E-04 |
| C9orf6  | 0.140054 | 1.44E-03 | 2.82E-03 |
| C9orf70 | -0.03173 | 4.72E-01 | 5.38E-01 |
| C9orf71 | -0.18524 | 2.33E-05 | 5.95E-05 |
| C9orf72 | 0.037596 | 3.95E-01 | 4.61E-01 |
| C9orf78 | 0.023786 | 5.90E-01 | 6.48E-01 |
| C9orf79 | -0.01902 | 6.67E-01 | 7.18E-01 |
| C9orf7  | -0.3644  | 1.29E-17 | 1.21E-16 |
| C9orf80 | 0.097901 | 2.63E-02 | 4.11E-02 |
| C9orf82 | 0.108157 | 1.41E-02 | 2.32E-02 |
| C9orf84 | 0.191896 | 1.16E-05 | 3.08E-05 |
| C9orf85 | 0.032774 | 4.58E-01 | 5.24E-01 |
| C9orf86 | 0.006443 | 8.84E-01 | 9.06E-01 |
| C9orf89 | 0.070958 | 1.08E-01 | 1.47E-01 |
| C9orf91 | -0.2214  | 3.87E-07 | 1.24E-06 |
| C9orf93 | -0.13364 | 2.37E-03 | 4.48E-03 |
| C9orf95 | -0.27216 | 3.38E-10 | 1.53E-09 |
| C9orf96 | -0.32701 | 2.67E-14 | 1.82E-13 |
| C9orf98 | -0.36784 | 6.04E-18 | 5.82E-17 |
| C9orf9  | -0.43629 | 2.41E-25 | 4.39E-24 |
| C9      | 0.148413 | 7.29E-04 | 1.50E-03 |
| CA10    | -0.30083 | 3.11E-12 | 1.74E-11 |
| CA11    | -0.02617 | 5.53E-01 | 6.15E-01 |
| CA12    | 0.080419 | 6.82E-02 | 9.80E-02 |
| CA13    | -0.36407 | 1.38E-17 | 1.30E-16 |
| CA14    | -0.07729 | 7.97E-02 | 1.13E-01 |
| CA1     | -0.16746 | 1.34E-04 | 3.07E-04 |
| CA2     | -0.15319 | 4.86E-04 | 1.02E-03 |
| CA3     | -0.50917 | 2.56E-35 | 8.98E-34 |
| CA4     | -0.30943 | 6.87E-13 | 4.11E-12 |
| CA5A    | 0.176922 | 5.41E-05 | 1.31E-04 |
| CA5BP   | 0.025849 | 5.58E-01 | 6.20E-01 |
| CA5B    | -0.40515 | 9.15E-22 | 1.23E-20 |
| CA6     | -0.06721 | 1.28E-01 | 1.71E-01 |
| CA7     | -0.06065 | 1.69E-01 | 2.20E-01 |
| CA8     | -0.14801 | 7.53E-04 | 1.54E-03 |
| CA9     | 0.163536 | 1.94E-04 | 4.33E-04 |
| CAB39L  | -0.31586 | 2.15E-13 | 1.34E-12 |
| CAB39   | 0.025518 | 5.63E-01 | 6.24E-01 |
| CABC1   | -0.46525 | 5.04E-29 | 1.21E-27 |
| CABIN1  | -0.28988 | 1.99E-11 | 1.01E-10 |
| CABLES1 | -0.44962 | 5.39E-27 | 1.11E-25 |

|          |          |          |          |
|----------|----------|----------|----------|
| CABLES2  | 0.197077 | 6.61E-06 | 1.81E-05 |
| CABP1    | 0.003567 | 9.36E-01 | 9.49E-01 |
| CABP2    | 0.05264  | 2.33E-01 | 2.92E-01 |
| CABP4    | -0.01641 | 7.10E-01 | 7.58E-01 |
| CABP5    | -0.04084 | 3.55E-01 | 4.21E-01 |
| CABP7    | -0.00697 | 8.75E-01 | 8.98E-01 |
| CABYR    | 0.173046 | 7.90E-05 | 1.87E-04 |
| CACHD1   | -0.33014 | 1.46E-14 | 1.02E-13 |
| CACNA1A  | 0.129773 | 3.17E-03 | 5.89E-03 |
| CACNA1B  | 0.040767 | 3.56E-01 | 4.22E-01 |
| CACNA1C  | -0.33942 | 2.37E-15 | 1.78E-14 |
| CACNA1D  | -0.38964 | 4.06E-20 | 4.79E-19 |
| CACNA1E  | 0.172983 | 7.95E-05 | 1.88E-04 |
| CACNA1F  | -0.24833 | 1.12E-08 | 4.23E-08 |
| CACNA1G  | -0.19271 | 1.06E-05 | 2.83E-05 |
| CACNA1H  | -0.21119 | 1.33E-06 | 3.96E-06 |
| CACNA1I  | 0.025742 | 5.60E-01 | 6.21E-01 |
| CACNA1S  | -0.05676 | 1.98E-01 | 2.53E-01 |
| CACNA2D1 | 0.124256 | 4.74E-03 | 8.55E-03 |
| CACNA2D2 | -0.59723 | 4.27E-51 | 2.95E-49 |
| CACNA2D3 | -0.30001 | 3.59E-12 | 1.99E-11 |
| CACNA2D4 | -0.17174 | 8.96E-05 | 2.10E-04 |
| CACNB1   | -0.45496 | 1.12E-27 | 2.45E-26 |
| CACNB2   | -0.05978 | 1.76E-01 | 2.28E-01 |
| CACNB3   | -0.21551 | 7.93E-07 | 2.44E-06 |
| CACNB4   | -0.32354 | 5.16E-14 | 3.43E-13 |
| CACNG1   | 0.072654 | 9.96E-02 | 1.37E-01 |
| CACNG2   | 0.133271 | 2.44E-03 | 4.61E-03 |
| CACNG3   | 0.01654  | 7.08E-01 | 7.56E-01 |
| CACNG4   | -0.0455  | 3.03E-01 | 3.66E-01 |
| CACNG5   | 0.063414 | 1.51E-01 | 1.99E-01 |
| CACNG6   | -0.14412 | 1.04E-03 | 2.08E-03 |
| CACNG7   | 0.186143 | 2.13E-05 | 5.45E-05 |
| CACNG8   | 0.072339 | 1.01E-01 | 1.39E-01 |
| CACYBP   | 0.399644 | 3.60E-21 | 4.64E-20 |
| CADM1    | -0.27955 | 1.06E-10 | 5.03E-10 |
| CADM2    | 0.052052 | 2.38E-01 | 2.98E-01 |
| CADM3    | -0.26221 | 1.52E-09 | 6.37E-09 |
| CADM4    | -0.07677 | 8.18E-02 | 1.15E-01 |
| CADPS2   | -0.30787 | 9.07E-13 | 5.35E-12 |
| CADPS    | -0.14698 | 8.21E-04 | 1.67E-03 |
| CAD      | 0.409421 | 3.11E-22 | 4.36E-21 |
| CAGE1    | 0.274884 | 2.22E-10 | 1.02E-09 |
| CALB1    | 0.147444 | 7.90E-04 | 1.61E-03 |

|           |          |          |          |
|-----------|----------|----------|----------|
| CALB2     | 0.156517 | 3.63E-04 | 7.80E-04 |
| CALCA     | 0.057751 | 1.91E-01 | 2.45E-01 |
| CALCB     | 0.169543 | 1.11E-04 | 2.56E-04 |
| CALCOCO1  | -0.56277 | 2.35E-44 | 1.33E-42 |
| CALCOCO2  | -0.29307 | 1.17E-11 | 6.10E-11 |
| CALCRL    | -0.26609 | 8.53E-10 | 3.67E-09 |
| CALCR     | 0.093488 | 3.39E-02 | 5.18E-02 |
| CALD1     | 0.061832 | 1.61E-01 | 2.11E-01 |
| CALHM1    | 0.035096 | 4.27E-01 | 4.93E-01 |
| CALHM2    | 0.06534  | 1.39E-01 | 1.84E-01 |
| CALHM3    | 0.060976 | 1.67E-01 | 2.18E-01 |
| CALM1     | -0.11725 | 7.73E-03 | 1.34E-02 |
| CALM2     | 0.1637   | 1.91E-04 | 4.27E-04 |
| CALM3     | 0.282544 | 6.58E-11 | 3.18E-10 |
| CALML3    | 0.116528 | 8.12E-03 | 1.40E-02 |
| CALML4    | -0.32998 | 1.51E-14 | 1.06E-13 |
| CALML5    | 0.079422 | 7.17E-02 | 1.02E-01 |
| CALML6    | -0.15569 | 3.91E-04 | 8.35E-04 |
| CALN1     | 0.02257  | 6.09E-01 | 6.66E-01 |
| CALR3     | 0.136736 | 1.87E-03 | 3.60E-03 |
| CALR      | 0.156524 | 3.63E-04 | 7.80E-04 |
| CALU      | 0.518603 | 8.55E-37 | 3.26E-35 |
| CALY      | 0.16784  | 1.30E-04 | 2.98E-04 |
| CAMK1D    | -0.20757 | 2.03E-06 | 5.92E-06 |
| CAMK1G    | -0.15861 | 3.02E-04 | 6.57E-04 |
| CAMK1     | -0.16176 | 2.28E-04 | 5.05E-04 |
| CAMK2A    | -0.28118 | 8.19E-11 | 3.93E-10 |
| CAMK2B    | 0.090732 | 3.96E-02 | 5.96E-02 |
| CAMK2D    | -0.35986 | 3.43E-17 | 3.13E-16 |
| CAMK2G    | -0.19156 | 1.20E-05 | 3.19E-05 |
| CAMK2N1   | 0.057579 | 1.92E-01 | 2.46E-01 |
| CAMK2N2   | 0.387826 | 6.25E-20 | 7.24E-19 |
| CAMK4     | -0.03378 | 4.44E-01 | 5.11E-01 |
| CAMKK1    | -0.35439 | 1.10E-16 | 9.48E-16 |
| CAMKK2    | 0.201399 | 4.09E-06 | 1.15E-05 |
| CAMKV     | 0.121884 | 5.61E-03 | 9.99E-03 |
| CAMLG     | -0.13983 | 1.47E-03 | 2.87E-03 |
| CAMP      | -0.02408 | 5.86E-01 | 6.44E-01 |
| CAMSAP1L1 | -0.02604 | 5.55E-01 | 6.17E-01 |
| CAMSAP1   | 0.082632 | 6.10E-02 | 8.84E-02 |
| CAMTA1    | -0.11398 | 9.63E-03 | 1.64E-02 |
| CAMTA2    | -0.3756  | 1.06E-18 | 1.10E-17 |
| CAND1     | 0.387805 | 6.28E-20 | 7.27E-19 |
| CAND2     | -0.02373 | 5.91E-01 | 6.49E-01 |

|         |          |          |          |
|---------|----------|----------|----------|
| CANT1   | 0.290305 | 1.85E-11 | 9.49E-11 |
| CANX    | -0.02372 | 5.91E-01 | 6.49E-01 |
| CAP1    | 0.105946 | 1.62E-02 | 2.64E-02 |
| CAP2    | 0.013189 | 7.65E-01 | 8.05E-01 |
| CAPG    | 0.005004 | 9.10E-01 | 9.28E-01 |
| CAPN10  | -0.12007 | 6.37E-03 | 1.12E-02 |
| CAPN11  | -0.16995 | 1.06E-04 | 2.47E-04 |
| CAPN12  | -0.22161 | 3.77E-07 | 1.21E-06 |
| CAPN13  | -0.23498 | 6.84E-08 | 2.38E-07 |
| CAPN14  | 0.052123 | 2.38E-01 | 2.97E-01 |
| CAPN1   | -0.05272 | 2.32E-01 | 2.91E-01 |
| CAPN2   | -0.19357 | 9.68E-06 | 2.60E-05 |
| CAPN3   | -0.51573 | 2.44E-36 | 9.02E-35 |
| CAPN5   | -0.18519 | 2.35E-05 | 5.98E-05 |
| CAPN6   | -0.3136  | 3.24E-13 | 2.00E-12 |
| CAPN7   | -0.12937 | 3.27E-03 | 6.05E-03 |
| CAPN8   | -0.43071 | 1.13E-24 | 1.93E-23 |
| CAPN9   | -0.34543 | 7.04E-16 | 5.61E-15 |
| CAPNS1  | 0.002915 | 9.47E-01 | 9.59E-01 |
| CAPNS2  | -0.11791 | 7.39E-03 | 1.28E-02 |
| CAPRIN1 | 0.17014  | 1.04E-04 | 2.43E-04 |
| CAPRIN2 | -0.03506 | 4.27E-01 | 4.94E-01 |
| CAPS2   | -0.10317 | 1.92E-02 | 3.08E-02 |
| CAPSL   | -0.22455 | 2.61E-07 | 8.54E-07 |
| CAPS    | -0.35076 | 2.35E-16 | 1.96E-15 |
| CAPZA1  | 0.45542  | 9.80E-28 | 2.15E-26 |
| CAPZA2  | 0.215641 | 7.81E-07 | 2.40E-06 |
| CAPZA3  | -0.04829 | 2.74E-01 | 3.36E-01 |
| CAPZB   | 0.162636 | 2.10E-04 | 4.68E-04 |
| CARD10  | -0.05229 | 2.36E-01 | 2.95E-01 |
| CARD11  | -0.10676 | 1.54E-02 | 2.52E-02 |
| CARD14  | 0.128263 | 3.55E-03 | 6.53E-03 |
| CARD16  | -0.1391  | 1.55E-03 | 3.03E-03 |
| CARD17  | 0.169218 | 1.14E-04 | 2.64E-04 |
| CARD18  | 0.166952 | 1.41E-04 | 3.22E-04 |
| CARD6   | -0.15421 | 4.45E-04 | 9.40E-04 |
| CARD8   | -0.27217 | 3.38E-10 | 1.53E-09 |
| CARD9   | -0.11439 | 9.37E-03 | 1.60E-02 |
| CARHSP1 | 0.285934 | 3.80E-11 | 1.88E-10 |
| CARKD   | -0.22144 | 3.85E-07 | 1.23E-06 |
| CARM1   | 0.245644 | 1.63E-08 | 6.05E-08 |
| CARNS1  | -0.34408 | 9.27E-16 | 7.28E-15 |
| CARS2   | -0.11451 | 9.30E-03 | 1.59E-02 |
| CARS    | 0.339112 | 2.52E-15 | 1.89E-14 |

|            |          |           |           |
|------------|----------|-----------|-----------|
| CARTPT     | 0.010866 | 8.06E-01  | 8.40E-01  |
| CASC1      | -0.3373  | 3.61E-15  | 2.67E-14  |
| CASC2      | -0.32043 | 9.23E-14  | 6.00E-13  |
| CASC3      | 0.039566 | 3.70E-01  | 4.36E-01  |
| CASC4      | -0.0911  | 3.88E-02  | 5.85E-02  |
| CASC5      | 0.786726 | 1.50E-109 | 2.88E-107 |
| CASD1      | -0.22912 | 1.46E-07  | 4.92E-07  |
| CASKIN1    | 0.070804 | 1.09E-01  | 1.48E-01  |
| CASKIN2    | -0.18227 | 3.17E-05  | 7.91E-05  |
| CASK       | 0.054955 | 2.13E-01  | 2.69E-01  |
| CASP10     | -0.18608 | 2.14E-05  | 5.48E-05  |
| CASP12     | -0.38197 | 2.46E-19  | 2.72E-18  |
| CASP14     | 0.158796 | 2.97E-04  | 6.47E-04  |
| CASP1      | -0.10691 | 1.52E-02  | 2.50E-02  |
| CASP2      | 0.280588 | 9.01E-11  | 4.30E-10  |
| CASP3      | 0.368709 | 4.98E-18  | 4.85E-17  |
| CASP4      | 0.046074 | 2.97E-01  | 3.60E-01  |
| CASP5      | 0.288821 | 2.37E-11  | 1.20E-10  |
| CASP6      | 0.174762 | 6.69E-05  | 1.60E-04  |
| CASP7      | 0.007935 | 8.57E-01  | 8.84E-01  |
| CASP8AP2   | 0.28298  | 6.14E-11  | 2.97E-10  |
| CASP8      | 0.080136 | 6.92E-02  | 9.92E-02  |
| CASP9      | -0.01364 | 7.57E-01  | 7.98E-01  |
| CASQ1      | -0.19331 | 9.96E-06  | 2.67E-05  |
| CASQ2      | -0.42549 | 4.63E-24  | 7.61E-23  |
| CASR       | -0.30189 | 2.59E-12  | 1.46E-11  |
| CASS4      | -0.34476 | 8.08E-16  | 6.41E-15  |
| CAST       | -0.09392 | 3.31E-02  | 5.07E-02  |
| CASZ1      | -0.44891 | 6.64E-27  | 1.35E-25  |
| CATSPER1   | 0.198205 | 5.84E-06  | 1.61E-05  |
| CATSPER2P1 | 0.075351 | 8.76E-02  | 1.22E-01  |
| CATSPER2   | -0.21616 | 7.34E-07  | 2.26E-06  |
| CATSPER3   | -0.14294 | 1.14E-03  | 2.27E-03  |
| CATSPER4   | 0.043742 | 3.22E-01  | 3.87E-01  |
| CATSPERB   | -0.08129 | 6.53E-02  | 9.41E-02  |
| CATSPERG   | -0.24712 | 1.33E-08  | 4.98E-08  |
| CAT        | -0.45368 | 1.64E-27  | 3.53E-26  |
| CAV1       | -0.16316 | 2.00E-04  | 4.47E-04  |
| CAV2       | -0.13125 | 2.84E-03  | 5.31E-03  |
| CAV3       | -0.51617 | 2.08E-36  | 7.73E-35  |
| CBARA1     | -0.08029 | 6.87E-02  | 9.85E-02  |
| CBFA2T2    | -0.00416 | 9.25E-01  | 9.40E-01  |
| CBFA2T3    | -0.34673 | 5.40E-16  | 4.35E-15  |
| CBFB       | 0.142969 | 1.14E-03  | 2.27E-03  |

|          |          |          |          |
|----------|----------|----------|----------|
| CBLB     | 0.108575 | 1.37E-02 | 2.27E-02 |
| CBLC     | 0.0933   | 3.43E-02 | 5.23E-02 |
| CBLL1    | 0.322319 | 6.49E-14 | 4.28E-13 |
| CBLN1    | -0.06106 | 1.67E-01 | 2.17E-01 |
| CBLN2    | 0.147113 | 8.12E-04 | 1.65E-03 |
| CBLN3    | -0.04265 | 3.34E-01 | 4.00E-01 |
| CBLN4    | -0.24665 | 1.41E-08 | 5.29E-08 |
| CBL      | 0.075642 | 8.64E-02 | 1.21E-01 |
| CBR1     | -0.19069 | 1.32E-05 | 3.47E-05 |
| CBR3     | -0.01934 | 6.61E-01 | 7.14E-01 |
| CBR4     | -0.28821 | 2.62E-11 | 1.32E-10 |
| CBS      | 0.276884 | 1.62E-10 | 7.56E-10 |
| CBWD1    | 0.082259 | 6.21E-02 | 8.99E-02 |
| CBWD2    | -0.01006 | 8.20E-01 | 8.52E-01 |
| CBWD3    | 0.155872 | 3.85E-04 | 8.22E-04 |
| CBWD5    | 0.118928 | 6.89E-03 | 1.20E-02 |
| CBWD6    | 0.114588 | 9.25E-03 | 1.58E-02 |
| CBX1     | 0.405405 | 8.58E-22 | 1.16E-20 |
| CBX2     | 0.29227  | 1.33E-11 | 6.94E-11 |
| CBX3     | 0.440743 | 6.90E-26 | 1.31E-24 |
| CBX4     | 0.021168 | 6.32E-01 | 6.87E-01 |
| CBX5     | 0.170393 | 1.02E-04 | 2.38E-04 |
| CBX6     | -0.0434  | 3.26E-01 | 3.91E-01 |
| CBX7     | -0.60062 | 8.37E-52 | 5.93E-50 |
| CBX8     | 0.105146 | 1.70E-02 | 2.76E-02 |
| CBY1     | -0.16437 | 1.79E-04 | 4.03E-04 |
| CC2D1A   | -0.10584 | 1.63E-02 | 2.66E-02 |
| CC2D1B   | -0.16441 | 1.79E-04 | 4.01E-04 |
| CC2D2A   | -0.32455 | 4.26E-14 | 2.86E-13 |
| CC2D2B   | -0.27233 | 3.29E-10 | 1.49E-09 |
| CCAR1    | 0.225474 | 2.33E-07 | 7.63E-07 |
| CCBE1    | -0.02923 | 5.08E-01 | 5.72E-01 |
| CCBL1    | -0.03925 | 3.74E-01 | 4.40E-01 |
| CCBL2    | -0.00227 | 9.59E-01 | 9.68E-01 |
| CCBP2    | 0.006797 | 8.78E-01 | 9.01E-01 |
| CCDC101  | -0.35315 | 1.43E-16 | 1.22E-15 |
| CCDC102A | -0.31589 | 2.13E-13 | 1.34E-12 |
| CCDC102B | -0.06718 | 1.28E-01 | 1.72E-01 |
| CCDC103  | -0.01262 | 7.75E-01 | 8.13E-01 |
| CCDC104  | -0.03099 | 4.83E-01 | 5.48E-01 |
| CCDC105  | 0.055356 | 2.10E-01 | 2.66E-01 |
| CCDC106  | -0.11927 | 6.73E-03 | 1.18E-02 |
| CCDC107  | -0.23187 | 1.03E-07 | 3.50E-07 |
| CCDC108  | -0.30216 | 2.47E-12 | 1.40E-11 |

|           |          |          |          |
|-----------|----------|----------|----------|
| CCDC109A  | -0.01105 | 8.03E-01 | 8.37E-01 |
| CCDC109B  | 0.335193 | 5.48E-15 | 3.99E-14 |
| CCDC110   | 0.143988 | 1.05E-03 | 2.10E-03 |
| CCDC111   | 0.036516 | 4.08E-01 | 4.75E-01 |
| CCDC112   | -0.07748 | 7.90E-02 | 1.12E-01 |
| CCDC113   | -0.10623 | 1.59E-02 | 2.60E-02 |
| CCDC114   | -0.29825 | 4.85E-12 | 2.65E-11 |
| CCDC115   | -0.36948 | 4.20E-18 | 4.13E-17 |
| CCDC116   | -0.09886 | 2.49E-02 | 3.90E-02 |
| CCDC117   | 0.032849 | 4.57E-01 | 5.23E-01 |
| CCDC11    | -0.22598 | 2.18E-07 | 7.19E-07 |
| CCDC120   | -0.14286 | 1.15E-03 | 2.29E-03 |
| CCDC121   | -0.15338 | 4.78E-04 | 1.01E-03 |
| CCDC122   | -0.00472 | 9.15E-01 | 9.32E-01 |
| CCDC123   | 0.266393 | 8.15E-10 | 3.52E-09 |
| CCDC124   | 0.086856 | 4.88E-02 | 7.22E-02 |
| CCDC125   | -0.22146 | 3.84E-07 | 1.23E-06 |
| CCDC126   | 0.105788 | 1.63E-02 | 2.66E-02 |
| CCDC127   | 0.034059 | 4.41E-01 | 5.07E-01 |
| CCDC129   | -0.14802 | 7.53E-04 | 1.54E-03 |
| CCDC12    | -0.19921 | 5.22E-06 | 1.45E-05 |
| CCDC130   | -0.19041 | 1.36E-05 | 3.57E-05 |
| CCDC132   | 0.231827 | 1.03E-07 | 3.52E-07 |
| CCDC134   | 0.088437 | 4.49E-02 | 6.68E-02 |
| CCDC135   | -0.2286  | 1.56E-07 | 5.23E-07 |
| CCDC136   | 0.060485 | 1.71E-01 | 2.22E-01 |
| CCDC137   | 0.329735 | 1.58E-14 | 1.10E-13 |
| CCDC138   | 0.503593 | 1.81E-34 | 6.04E-33 |
| CCDC13    | -0.35104 | 2.22E-16 | 1.86E-15 |
| CCDC140   | 0.131669 | 2.75E-03 | 5.16E-03 |
| CCDC141   | -0.25665 | 3.43E-09 | 1.38E-08 |
| CCDC142   | 0.156887 | 3.52E-04 | 7.57E-04 |
| CCDC144A  | -0.13195 | 2.70E-03 | 5.06E-03 |
| CCDC144B  | -0.16056 | 2.54E-04 | 5.58E-04 |
| CCDC144C  | 0.076266 | 8.38E-02 | 1.18E-01 |
| CCDC144NL | 0.085081 | 5.37E-02 | 7.86E-02 |
| CCDC146   | -0.35857 | 4.52E-17 | 4.08E-16 |
| CCDC147   | -0.35198 | 1.82E-16 | 1.53E-15 |
| CCDC148   | -0.03821 | 3.87E-01 | 4.53E-01 |
| CCDC149   | -0.26106 | 1.80E-09 | 7.49E-09 |
| CCDC14    | -0.00681 | 8.77E-01 | 9.01E-01 |
| CCDC150   | 0.518575 | 8.64E-37 | 3.29E-35 |
| CCDC151   | -0.16094 | 2.45E-04 | 5.40E-04 |
| CCDC152   | -0.3636  | 1.53E-17 | 1.43E-16 |



|          |          |          |          |
|----------|----------|----------|----------|
| CCDC153  | -0.14874 | 7.09E-04 | 1.46E-03 |
| CCDC154  | -0.08233 | 6.19E-02 | 8.97E-02 |
| CCDC155  | -0.00468 | 9.16E-01 | 9.33E-01 |
| CCDC157  | -0.30408 | 1.77E-12 | 1.01E-11 |
| CCDC158  | -0.00314 | 9.43E-01 | 9.56E-01 |
| CCDC159  | -0.4495  | 5.59E-27 | 1.14E-25 |
| CCDC15   | 0.232992 | 8.88E-08 | 3.05E-07 |
| CCDC160  | 0.048575 | 2.71E-01 | 3.33E-01 |
| CCDC163P | 0.162896 | 2.05E-04 | 4.58E-04 |
| CCDC17   | -0.25336 | 5.50E-09 | 2.17E-08 |
| CCDC18   | 0.463113 | 9.70E-29 | 2.28E-27 |
| CCDC19   | -0.21677 | 6.82E-07 | 2.11E-06 |
| CCDC21   | 0.311857 | 4.44E-13 | 2.71E-12 |
| CCDC22   | -0.00472 | 9.15E-01 | 9.32E-01 |
| CCDC23   | 0.050428 | 2.53E-01 | 3.14E-01 |
| CCDC24   | -0.23312 | 8.72E-08 | 3.00E-07 |
| CCDC25   | -0.07629 | 8.37E-02 | 1.18E-01 |
| CCDC27   | 0.019343 | 6.61E-01 | 7.14E-01 |
| CCDC28A  | -0.37291 | 1.95E-18 | 1.98E-17 |
| CCDC28B  | 0.184909 | 2.42E-05 | 6.14E-05 |
| CCDC30   | -0.4114  | 1.87E-22 | 2.67E-21 |
| CCDC33   | -0.2257  | 2.26E-07 | 7.43E-07 |
| CCDC34   | 0.523659 | 1.32E-37 | 5.23E-36 |
| CCDC36   | -0.12987 | 3.15E-03 | 5.85E-03 |
| CCDC37   | -0.27016 | 4.59E-10 | 2.05E-09 |
| CCDC38   | 0.077959 | 7.71E-02 | 1.09E-01 |
| CCDC39   | -0.28968 | 2.06E-11 | 1.05E-10 |
| CCDC3    | -0.20305 | 3.40E-06 | 9.68E-06 |
| CCDC40   | -0.22252 | 3.37E-07 | 1.08E-06 |
| CCDC41   | -0.00732 | 8.68E-01 | 8.93E-01 |
| CCDC42B  | -0.29932 | 4.04E-12 | 2.23E-11 |
| CCDC42   | -0.14313 | 1.13E-03 | 2.24E-03 |
| CCDC43   | 0.456359 | 7.42E-28 | 1.63E-26 |
| CCDC45   | -0.01798 | 6.84E-01 | 7.34E-01 |
| CCDC46   | -0.42193 | 1.20E-23 | 1.91E-22 |
| CCDC47   | -0.02061 | 6.41E-01 | 6.95E-01 |
| CCDC48   | -0.54991 | 4.90E-42 | 2.49E-40 |
| CCDC50   | 0.03769  | 3.93E-01 | 4.60E-01 |
| CCDC51   | 0.204593 | 2.85E-06 | 8.18E-06 |
| CCDC52   | 0.235975 | 6.00E-08 | 2.09E-07 |
| CCDC53   | -0.0104  | 8.14E-01 | 8.46E-01 |
| CCDC54   | -0.04696 | 2.87E-01 | 3.50E-01 |
| CCDC55   | 0.009371 | 8.32E-01 | 8.62E-01 |
| CCDC56   | -0.07461 | 9.07E-02 | 1.26E-01 |

|         |          |          |          |
|---------|----------|----------|----------|
| CCDC57  | -0.34867 | 3.63E-16 | 2.97E-15 |
| CCDC58  | 0.559587 | 9.00E-44 | 4.95E-42 |
| CCDC59  | 0.47765  | 1.04E-30 | 2.81E-29 |
| CCDC60  | -0.29854 | 4.62E-12 | 2.53E-11 |
| CCDC61  | -0.30853 | 8.06E-13 | 4.78E-12 |
| CCDC62  | 0.075969 | 8.50E-02 | 1.19E-01 |
| CCDC63  | 0.088389 | 4.50E-02 | 6.70E-02 |
| CCDC64B | -0.45751 | 5.26E-28 | 1.18E-26 |
| CCDC64  | 0.049357 | 2.64E-01 | 3.25E-01 |
| CCDC65  | -0.269   | 5.49E-10 | 2.42E-09 |
| CCDC66  | -0.31619 | 2.02E-13 | 1.27E-12 |
| CCDC67  | 0.067602 | 1.25E-01 | 1.69E-01 |
| CCDC68  | -0.23077 | 1.18E-07 | 4.01E-07 |
| CCDC69  | -0.37998 | 3.90E-19 | 4.20E-18 |
| CCDC6   | -0.08026 | 6.88E-02 | 9.86E-02 |
| CCDC70  | 0.082837 | 6.03E-02 | 8.75E-02 |
| CCDC71  | -0.1617  | 2.29E-04 | 5.07E-04 |
| CCDC72  | 0.013138 | 7.66E-01 | 8.06E-01 |
| CCDC73  | -0.22329 | 3.06E-07 | 9.89E-07 |
| CCDC74A | 0.069096 | 1.17E-01 | 1.59E-01 |
| CCDC74B | -0.00332 | 9.40E-01 | 9.53E-01 |
| CCDC75  | 0.302659 | 2.27E-12 | 1.29E-11 |
| CCDC76  | 0.037601 | 3.94E-01 | 4.61E-01 |
| CCDC77  | 0.381844 | 2.54E-19 | 2.79E-18 |
| CCDC78  | -0.2433  | 2.24E-08 | 8.21E-08 |
| CCDC79  | -0.07757 | 7.86E-02 | 1.11E-01 |
| CCDC7   | 0.063848 | 1.48E-01 | 1.95E-01 |
| CCDC80  | 0.033651 | 4.46E-01 | 5.12E-01 |
| CCDC81  | -0.29046 | 1.80E-11 | 9.26E-11 |
| CCDC82  | -0.079   | 7.33E-02 | 1.04E-01 |
| CCDC83  | 0.074434 | 9.15E-02 | 1.27E-01 |
| CCDC84  | -0.22905 | 1.48E-07 | 4.96E-07 |
| CCDC85A | -0.27816 | 1.32E-10 | 6.23E-10 |
| CCDC85B | 0.088497 | 4.47E-02 | 6.66E-02 |
| CCDC85C | 0.194407 | 8.85E-06 | 2.39E-05 |
| CCDC86  | 0.441391 | 5.74E-26 | 1.10E-24 |
| CCDC87  | 0.052602 | 2.33E-01 | 2.92E-01 |
| CCDC88A | 0.29535  | 7.95E-12 | 4.23E-11 |
| CCDC88B | -0.2117  | 1.25E-06 | 3.74E-06 |
| CCDC88C | -0.17345 | 7.60E-05 | 1.80E-04 |
| CCDC89  | -0.18244 | 3.11E-05 | 7.77E-05 |
| CCDC8   | -0.231   | 1.15E-07 | 3.90E-07 |
| CCDC90A | -0.04062 | 3.58E-01 | 4.24E-01 |
| CCDC90B | 0.42957  | 1.53E-24 | 2.61E-23 |

|             |          |           |           |
|-------------|----------|-----------|-----------|
| CCDC91      | 0.171251 | 9.39E-05  | 2.20E-04  |
| CCDC92      | -0.40792 | 4.55E-22  | 6.30E-21  |
| CCDC93      | -0.08575 | 5.18E-02  | 7.61E-02  |
| CCDC94      | -0.09588 | 2.96E-02  | 4.57E-02  |
| CCDC96      | -0.26837 | 6.04E-10  | 2.65E-09  |
| CCDC97      | -0.10377 | 1.85E-02  | 2.98E-02  |
| CCDC99      | 0.646838 | 2.30E-62  | 2.11E-60  |
| CCDC9       | -0.0422  | 3.39E-01  | 4.05E-01  |
| CCHCR1      | 0.132677 | 2.55E-03  | 4.80E-03  |
| CCIN        | 0.117466 | 7.62E-03  | 1.32E-02  |
| CCKAR       | -0.09647 | 2.86E-02  | 4.43E-02  |
| CCKBR       | -0.0375  | 3.96E-01  | 4.62E-01  |
| CCK         | -0.04186 | 3.43E-01  | 4.09E-01  |
| CCL11       | 0.282848 | 6.27E-11  | 3.04E-10  |
| CCL13       | -0.12663 | 4.00E-03  | 7.29E-03  |
| CCL14-CCL15 | -0.11589 | 8.48E-03  | 1.46E-02  |
| CCL14       | -0.41757 | 3.79E-23  | 5.75E-22  |
| CCL15       | -0.05716 | 1.95E-01  | 2.50E-01  |
| CCL16       | -0.34734 | 4.77E-16  | 3.86E-15  |
| CCL17       | -0.29425 | 9.57E-12  | 5.05E-11  |
| CCL18       | 0.044758 | 3.11E-01  | 3.75E-01  |
| CCL19       | -0.23024 | 1.27E-07  | 4.29E-07  |
| CCL1        | 0.132184 | 2.65E-03  | 4.97E-03  |
| CCL20       | 0.171205 | 9.43E-05  | 2.21E-04  |
| CCL21       | -0.02449 | 5.79E-01  | 6.39E-01  |
| CCL22       | -0.19003 | 1.41E-05  | 3.70E-05  |
| CCL23       | -0.16487 | 1.71E-04  | 3.86E-04  |
| CCL24       | 0.12084  | 6.04E-03  | 1.07E-02  |
| CCL25       | 0.111485 | 1.13E-02  | 1.91E-02  |
| CCL26       | 0.42221  | 1.11E-23  | 1.77E-22  |
| CCL27       | 0.003042 | 9.45E-01  | 9.57E-01  |
| CCL28       | 0.004581 | 9.17E-01  | 9.34E-01  |
| CCL2        | 0.078575 | 7.48E-02  | 1.06E-01  |
| CCL3L1      | 0.207915 | 1.95E-06  | 5.69E-06  |
| CCL3L3      | 0.023461 | 5.95E-01  | 6.53E-01  |
| CCL3        | 0.210915 | 1.37E-06  | 4.08E-06  |
| CCL4L2      | 0.270702 | 4.23E-10  | 1.89E-09  |
| CCL4        | 0.265237 | 9.69E-10  | 4.15E-09  |
| CCL5        | 0.110718 | 1.19E-02  | 2.00E-02  |
| CCL7        | 0.385627 | 1.05E-19  | 1.19E-18  |
| CCL8        | 0.322106 | 6.75E-14  | 4.45E-13  |
| CCM2        | 0.190636 | 1.33E-05  | 3.49E-05  |
| CCNA1       | 0.028132 | 5.24E-01  | 5.88E-01  |
| CCNA2       | 0.897129 | 3.79E-184 | 1.89E-180 |

|          |          |           |           |
|----------|----------|-----------|-----------|
| CCNB1IP1 | 0.132735 | 2.54E-03  | 4.78E-03  |
| CCNB1    | 0.86136  | 5.21E-153 | 3.26E-150 |
| CCNB2    | 0.896301 | 2.65E-183 | 1.06E-179 |
| CCNB3    | 0.078495 | 7.51E-02  | 1.07E-01  |
| CCNC     | 0.277742 | 1.41E-10  | 6.64E-10  |
| CCND1    | -0.09541 | 3.04E-02  | 4.69E-02  |
| CCND2    | -0.26286 | 1.38E-09  | 5.81E-09  |
| CCND3    | -0.3648  | 1.18E-17  | 1.12E-16  |
| CCNDBP1  | -0.31609 | 2.06E-13  | 1.29E-12  |
| CCNE1    | 0.698817 | 1.13E-76  | 1.32E-74  |
| CCNE2    | 0.707477 | 2.32E-79  | 2.84E-77  |
| CCNF     | 0.639453 | 1.48E-60  | 1.30E-58  |
| CCNG1    | -0.1503  | 6.21E-04  | 1.29E-03  |
| CCNG2    | 0.146907 | 8.26E-04  | 1.68E-03  |
| CCNH     | -0.05694 | 1.97E-01  | 2.52E-01  |
| CCNI2    | 0.109325 | 1.31E-02  | 2.17E-02  |
| CCNI     | 0.082218 | 6.23E-02  | 9.01E-02  |
| CCNJL    | -0.21001 | 1.52E-06  | 4.51E-06  |
| CCNJ     | 0.216043 | 7.44E-07  | 2.29E-06  |
| CCNK     | 0.300777 | 3.14E-12  | 1.76E-11  |
| CCNL1    | -0.07905 | 7.31E-02  | 1.04E-01  |
| CCNL2    | -0.24822 | 1.14E-08  | 4.30E-08  |
| CCNO     | -0.00204 | 9.63E-01  | 9.71E-01  |
| CCNT1    | 0.186601 | 2.03E-05  | 5.21E-05  |
| CCNT2    | -0.11846 | 7.12E-03  | 1.24E-02  |
| CCNYL1   | 0.227888 | 1.71E-07  | 5.70E-07  |
| CCNY     | 0.096081 | 2.92E-02  | 4.52E-02  |
| CCPG1    | -0.31228 | 4.12E-13  | 2.51E-12  |
| CCR10    | 0.119018 | 6.85E-03  | 1.20E-02  |
| CCR1     | 0.048155 | 2.75E-01  | 3.37E-01  |
| CCR2     | -0.18333 | 2.84E-05  | 7.14E-05  |
| CCR3     | -0.10207 | 2.05E-02  | 3.28E-02  |
| CCR4     | -0.16732 | 1.36E-04  | 3.11E-04  |
| CCR5     | -0.00117 | 9.79E-01  | 9.84E-01  |
| CCR6     | -0.34201 | 1.41E-15  | 1.08E-14  |
| CCR7     | -0.21654 | 7.01E-07  | 2.17E-06  |
| CCR8     | 0.054878 | 2.14E-01  | 2.70E-01  |
| CCR9     | -0.14964 | 6.57E-04  | 1.36E-03  |
| CCRL1    | -0.07164 | 1.04E-01  | 1.43E-01  |
| CCRL2    | -0.11958 | 6.59E-03  | 1.16E-02  |
| CCRN4L   | 0.509832 | 2.02E-35  | 7.12E-34  |
| CCS      | -0.12526 | 4.42E-03  | 8.00E-03  |
| CCT2     | 0.425859 | 4.19E-24  | 6.93E-23  |
| CCT3     | 0.41823  | 3.18E-23  | 4.87E-22  |

|          |          |          |          |
|----------|----------|----------|----------|
| CCT4     | 0.561913 | 3.38E-44 | 1.90E-42 |
| CCT5     | 0.565479 | 7.40E-45 | 4.30E-43 |
| CCT6A    | 0.546012 | 2.36E-41 | 1.15E-39 |
| CCT6B    | -0.27471 | 2.28E-10 | 1.05E-09 |
| CCT6P1   | -0.13988 | 1.46E-03 | 2.86E-03 |
| CCT7     | 0.572849 | 3.03E-46 | 1.85E-44 |
| CCT8L2   | -0.21089 | 1.38E-06 | 4.09E-06 |
| CCT8     | 0.428371 | 2.13E-24 | 3.59E-23 |
| CD101    | -0.10491 | 1.72E-02 | 2.80E-02 |
| CD109    | 0.390877 | 3.02E-20 | 3.61E-19 |
| CD14     | 0.050927 | 2.49E-01 | 3.09E-01 |
| CD151    | -0.32439 | 4.40E-14 | 2.95E-13 |
| CD160    | -0.11202 | 1.10E-02 | 1.85E-02 |
| CD163L1  | 0.187787 | 1.79E-05 | 4.64E-05 |
| CD163    | 0.066424 | 1.32E-01 | 1.77E-01 |
| CD164L2  | -0.3905  | 3.31E-20 | 3.94E-19 |
| CD164    | 0.013082 | 7.67E-01 | 8.06E-01 |
| CD177    | 0.052159 | 2.37E-01 | 2.97E-01 |
| CD180    | -0.06814 | 1.22E-01 | 1.65E-01 |
| CD19     | -0.09933 | 2.42E-02 | 3.81E-02 |
| CD1A     | -0.3579  | 5.22E-17 | 4.67E-16 |
| CD1B     | -0.31901 | 1.20E-13 | 7.71E-13 |
| CD1C     | -0.43793 | 1.52E-25 | 2.81E-24 |
| CD1D     | -0.12409 | 4.80E-03 | 8.65E-03 |
| CD1E     | -0.46409 | 7.19E-29 | 1.71E-27 |
| CD200R1L | -0.09623 | 2.90E-02 | 4.49E-02 |
| CD200R1  | -0.19164 | 1.19E-05 | 3.16E-05 |
| CD200    | 0.009572 | 8.28E-01 | 8.59E-01 |
| CD207    | -0.44368 | 2.99E-26 | 5.86E-25 |
| CD209    | 0.060813 | 1.68E-01 | 2.19E-01 |
| CD226    | 0.023857 | 5.89E-01 | 6.47E-01 |
| CD22     | -0.29889 | 4.35E-12 | 2.39E-11 |
| CD244    | 0.016007 | 7.17E-01 | 7.64E-01 |
| CD247    | -0.04307 | 3.29E-01 | 3.95E-01 |
| CD248    | 0.017563 | 6.91E-01 | 7.40E-01 |
| CD24     | 0.017079 | 6.99E-01 | 7.48E-01 |
| CD274    | 0.28702  | 3.18E-11 | 1.59E-10 |
| CD276    | 0.305863 | 1.29E-12 | 7.51E-12 |
| CD27     | -0.14209 | 1.22E-03 | 2.43E-03 |
| CD28     | -0.12886 | 3.40E-03 | 6.27E-03 |
| CD2AP    | 0.188014 | 1.75E-05 | 4.54E-05 |
| CD2BP2   | -0.0184  | 6.77E-01 | 7.28E-01 |
| CD2      | -0.05394 | 2.22E-01 | 2.79E-01 |
| CD300A   | 0.129279 | 3.29E-03 | 6.09E-03 |

|         |          |          |          |
|---------|----------|----------|----------|
| CD300C  | -0.07135 | 1.06E-01 | 1.45E-01 |
| CD300E  | 0.117958 | 7.37E-03 | 1.28E-02 |
| CD300LB | -0.14915 | 6.85E-04 | 1.41E-03 |
| CD300LD | 0.019793 | 6.54E-01 | 7.07E-01 |
| CD300LF | -0.16448 | 1.77E-04 | 3.99E-04 |
| CD300LG | -0.50396 | 1.60E-34 | 5.34E-33 |
| CD302   | -0.62088 | 3.24E-56 | 2.56E-54 |
| CD320   | 0.01823  | 6.80E-01 | 7.30E-01 |
| CD33    | -0.17017 | 1.04E-04 | 2.43E-04 |
| CD34    | -0.37435 | 1.41E-18 | 1.45E-17 |
| CD36    | -0.21364 | 9.93E-07 | 3.01E-06 |
| CD37    | -0.2613  | 1.74E-09 | 7.24E-09 |
| CD38    | -0.03687 | 4.04E-01 | 4.70E-01 |
| CD3D    | 0.018202 | 6.80E-01 | 7.31E-01 |
| CD3EAP  | 0.215992 | 7.49E-07 | 2.31E-06 |
| CD3E    | -0.06556 | 1.37E-01 | 1.83E-01 |
| CD3G    | 0.019502 | 6.59E-01 | 7.11E-01 |
| CD40LG  | -0.35107 | 2.20E-16 | 1.84E-15 |
| CD40    | -0.01057 | 8.11E-01 | 8.44E-01 |
| CD44    | -0.13877 | 1.59E-03 | 3.10E-03 |
| CD46    | -0.14785 | 7.63E-04 | 1.56E-03 |
| CD47    | -0.23153 | 1.07E-07 | 3.66E-07 |
| CD48    | -0.09713 | 2.75E-02 | 4.28E-02 |
| CD4     | -0.18404 | 2.64E-05 | 6.67E-05 |
| CD52    | -0.20671 | 2.24E-06 | 6.49E-06 |
| CD53    | -0.0172  | 6.97E-01 | 7.46E-01 |
| CD55    | -0.30924 | 7.11E-13 | 4.24E-12 |
| CD58    | 0.015811 | 7.20E-01 | 7.67E-01 |
| CD59    | -0.32783 | 2.29E-14 | 1.57E-13 |
| CD5L    | -0.14866 | 7.14E-04 | 1.47E-03 |
| CD5     | -0.17081 | 9.80E-05 | 2.29E-04 |
| CD63    | -0.23296 | 8.91E-08 | 3.06E-07 |
| CD68    | 0.040866 | 3.55E-01 | 4.21E-01 |
| CD69    | -0.13103 | 2.89E-03 | 5.39E-03 |
| CD6     | -0.09283 | 3.52E-02 | 5.36E-02 |
| CD70    | 0.18508  | 2.37E-05 | 6.04E-05 |
| CD72    | 0.141928 | 1.24E-03 | 2.46E-03 |
| CD74    | -0.33879 | 2.69E-15 | 2.01E-14 |
| CD79A   | -0.11903 | 6.85E-03 | 1.20E-02 |
| CD79B   | -0.15396 | 4.54E-04 | 9.60E-04 |
| CD7     | 0.145105 | 9.58E-04 | 1.93E-03 |
| CD80    | 0.005516 | 9.01E-01 | 9.20E-01 |
| CD81    | -0.59391 | 2.06E-50 | 1.41E-48 |
| CD82    | -0.2659  | 8.77E-10 | 3.77E-09 |

|          |          |           |           |
|----------|----------|-----------|-----------|
| CD83     | -0.23185 | 1.03E-07  | 3.51E-07  |
| CD84     | -0.02359 | 5.93E-01  | 6.51E-01  |
| CD86     | 0.063716 | 1.49E-01  | 1.96E-01  |
| CD8A     | 0.131185 | 2.86E-03  | 5.34E-03  |
| CD8B     | 0.167534 | 1.34E-04  | 3.06E-04  |
| CD93     | -0.1944  | 8.86E-06  | 2.39E-05  |
| CD96     | -0.08685 | 4.89E-02  | 7.22E-02  |
| CD97     | -0.26566 | 9.09E-10  | 3.91E-09  |
| CD99L2   | -0.1377  | 1.74E-03  | 3.36E-03  |
| CD99     | 0.190288 | 1.38E-05  | 3.61E-05  |
| CD9      | -0.1414  | 1.29E-03  | 2.56E-03  |
| CDADC1   | -0.24645 | 1.45E-08  | 5.43E-08  |
| CDAN1    | -0.13196 | 2.70E-03  | 5.05E-03  |
| CDA      | 0.195948 | 7.48E-06  | 2.04E-05  |
| CDC123   | 0.327425 | 2.47E-14  | 1.69E-13  |
| CDC14A   | -0.0753  | 8.78E-02  | 1.23E-01  |
| CDC14B   | -0.21608 | 7.41E-07  | 2.28E-06  |
| CDC14C   | -0.06566 | 1.37E-01  | 1.82E-01  |
| CDC16    | -0.08901 | 4.35E-02  | 6.49E-02  |
| CDC20B   | -0.12759 | 3.73E-03  | 6.83E-03  |
| CDC20    | 0.852952 | 5.97E-147 | 2.84E-144 |
| CDC23    | 0.172596 | 8.25E-05  | 1.95E-04  |
| CDC25A   | 0.806548 | 3.37E-119 | 7.74E-117 |
| CDC25B   | 0.215478 | 7.97E-07  | 2.44E-06  |
| CDC25C   | 0.841158 | 4.62E-139 | 1.74E-136 |
| CDC26    | 0.090213 | 4.07E-02  | 6.12E-02  |
| CDC27    | 0.521197 | 3.30E-37  | 1.28E-35  |
| CDC34    | 0.33043  | 1.39E-14  | 9.70E-14  |
| CDC37L1  | -0.13294 | 2.50E-03  | 4.71E-03  |
| CDC37    | 0.088841 | 4.39E-02  | 6.55E-02  |
| CDC40    | 0.044574 | 3.13E-01  | 3.77E-01  |
| CDC42BPA | -0.29658 | 6.45E-12  | 3.47E-11  |
| CDC42BPB | -0.0012  | 9.78E-01  | 9.84E-01  |
| CDC42BPG | -0.19764 | 6.22E-06  | 1.71E-05  |
| CDC42EP1 | -0.18456 | 2.50E-05  | 6.35E-05  |
| CDC42EP2 | 0.174166 | 7.09E-05  | 1.69E-04  |
| CDC42EP3 | -0.10274 | 1.97E-02  | 3.16E-02  |
| CDC42EP4 | -0.19629 | 7.21E-06  | 1.97E-05  |
| CDC42EP5 | -0.03727 | 3.99E-01  | 4.65E-01  |
| CDC42SE1 | 0.073609 | 9.52E-02  | 1.32E-01  |
| CDC42SE2 | -0.14657 | 8.50E-04  | 1.73E-03  |
| CDC42    | 0.033892 | 4.43E-01  | 5.09E-01  |
| CDC45    | 0.844645 | 2.52E-141 | 1.05E-138 |
| CDC5L    | 0.31035  | 5.83E-13  | 3.51E-12  |

|        |          |           |           |
|--------|----------|-----------|-----------|
| CDC6   | 0.879085 | 3.36E-167 | 3.95E-164 |
| CDC73  | 0.213656 | 9.91E-07  | 3.00E-06  |
| CDC7   | 0.711955 | 8.62E-81  | 1.06E-78  |
| CDCA2  | 0.838496 | 2.27E-137 | 7.70E-135 |
| CDCA3  | 0.815764 | 4.48E-124 | 1.12E-121 |
| CDCA4  | 0.685862 | 7.96E-73  | 8.74E-71  |
| CDCA5  | 0.873586 | 1.43E-162 | 1.43E-159 |
| CDCA7L | 0.039268 | 3.74E-01  | 4.40E-01  |
| CDCA7  | 0.409803 | 2.82E-22  | 3.97E-21  |
| CDCA8  | 0.869786 | 1.70E-159 | 1.48E-156 |
| CDCP1  | 0.259221 | 2.36E-09  | 9.67E-09  |
| CDCP2  | -0.08132 | 6.52E-02  | 9.40E-02  |
| CDH10  | -0.03139 | 4.77E-01  | 5.42E-01  |
| CDH11  | -0.08487 | 5.43E-02  | 7.94E-02  |
| CDH12  | 0.101691 | 2.10E-02  | 3.34E-02  |
| CDH13  | -0.03577 | 4.18E-01  | 4.84E-01  |
| CDH15  | -0.36913 | 4.54E-18  | 4.44E-17  |
| CDH16  | -0.18674 | 2.00E-05  | 5.14E-05  |
| CDH17  | 0.083134 | 5.94E-02  | 8.63E-02  |
| CDH18  | 0.346033 | 6.23E-16  | 4.99E-15  |
| CDH19  | -0.17015 | 1.04E-04  | 2.43E-04  |
| CDH1   | -0.05999 | 1.74E-01  | 2.26E-01  |
| CDH20  | -0.32814 | 2.15E-14  | 1.48E-13  |
| CDH22  | -0.09892 | 2.48E-02  | 3.89E-02  |
| CDH23  | -0.32178 | 7.17E-14  | 4.72E-13  |
| CDH24  | 0.427945 | 2.39E-24  | 4.01E-23  |
| CDH26  | -0.26489 | 1.02E-09  | 4.36E-09  |
| CDH2   | 0.220512 | 4.32E-07  | 1.37E-06  |
| CDH3   | 0.205737 | 2.50E-06  | 7.21E-06  |
| CDH4   | -0.19548 | 7.87E-06  | 2.14E-05  |
| CDH5   | -0.29124 | 1.58E-11  | 8.16E-11  |
| CDH6   | -0.13616 | 1.96E-03  | 3.75E-03  |
| CDH7   | 0.316515 | 1.90E-13  | 1.20E-12  |
| CDH8   | -0.06334 | 1.51E-01  | 1.99E-01  |
| CDH9   | 0.02169  | 6.23E-01  | 6.79E-01  |
| CDHR1  | -0.16691 | 1.42E-04  | 3.23E-04  |
| CDHR2  | 0.082663 | 6.09E-02  | 8.82E-02  |
| CDHR3  | -0.36972 | 3.98E-18  | 3.92E-17  |
| CDHR4  | -0.25315 | 5.68E-09  | 2.23E-08  |
| CDHR5  | -0.03675 | 4.05E-01  | 4.72E-01  |
| CDIPT  | -0.32028 | 9.50E-14  | 6.16E-13  |
| CDK10  | -0.35271 | 1.57E-16  | 1.33E-15  |
| CDK11A | -0.14251 | 1.18E-03  | 2.35E-03  |
| CDK11B | -0.06623 | 1.33E-01  | 1.78E-01  |



|            |          |           |           |
|------------|----------|-----------|-----------|
| CDK12      | 0.285681 | 3.96E-11  | 1.95E-10  |
| CDK13      | 0.000953 | 9.83E-01  | 9.87E-01  |
| CDK14      | -0.08081 | 6.69E-02  | 9.62E-02  |
| CDK15      | -0.20628 | 2.35E-06  | 6.80E-06  |
| CDK16      | 0.352417 | 1.66E-16  | 1.41E-15  |
| CDK17      | 0.18907  | 1.57E-05  | 4.09E-05  |
| CDK18      | -0.37518 | 1.17E-18  | 1.21E-17  |
| CDK19      | -0.0844  | 5.56E-02  | 8.12E-02  |
| CDK1       | 0.862616 | 5.99E-154 | 3.86E-151 |
| CDK20      | -0.34995 | 2.78E-16  | 2.30E-15  |
| CDK2AP1    | 0.214002 | 9.51E-07  | 2.88E-06  |
| CDK2AP2    | -0.2164  | 7.13E-07  | 2.20E-06  |
| CDK2       | 0.694848 | 1.80E-75  | 2.06E-73  |
| CDK3       | -0.18006 | 3.96E-05  | 9.75E-05  |
| CDK4       | 0.420388 | 1.80E-23  | 2.82E-22  |
| CDK5R1     | 0.430823 | 1.09E-24  | 1.88E-23  |
| CDK5R2     | 0.302639 | 2.28E-12  | 1.29E-11  |
| CDK5RAP1   | 0.159449 | 2.80E-04  | 6.12E-04  |
| CDK5RAP2   | 0.050315 | 2.54E-01  | 3.15E-01  |
| CDK5RAP3   | -0.1689  | 1.17E-04  | 2.71E-04  |
| CDK5       | 0.196138 | 7.33E-06  | 2.00E-05  |
| CDK6       | 0.226105 | 2.15E-07  | 7.08E-07  |
| CDK7       | 0.074168 | 9.27E-02  | 1.29E-01  |
| CDK8       | 0.419315 | 2.39E-23  | 3.70E-22  |
| CDK9       | -0.23763 | 4.81E-08  | 1.70E-07  |
| CDKAL1     | 0.233599 | 8.20E-08  | 2.82E-07  |
| CDKL1      | -0.30308 | 2.11E-12  | 1.20E-11  |
| CDKL2      | -0.47977 | 5.26E-31  | 1.44E-29  |
| CDKL3      | -0.12932 | 3.28E-03  | 6.07E-03  |
| CDKL4      | 0.04841  | 2.73E-01  | 3.35E-01  |
| CDKL5      | -0.20774 | 1.99E-06  | 5.81E-06  |
| CDKN1A     | 0.032429 | 4.63E-01  | 5.29E-01  |
| CDKN1B     | 0.041955 | 3.42E-01  | 4.08E-01  |
| CDKN1C     | -0.23742 | 4.95E-08  | 1.74E-07  |
| CDKN2AIPNL | 0.227575 | 1.78E-07  | 5.92E-07  |
| CDKN2AIP   | -0.1041  | 1.81E-02  | 2.93E-02  |
| CDKN2A     | 0.166198 | 1.51E-04  | 3.43E-04  |
| CDKN2BAS   | 0.191196 | 1.25E-05  | 3.30E-05  |
| CDKN2B     | -0.12755 | 3.74E-03  | 6.85E-03  |
| CDKN2C     | 0.341305 | 1.62E-15  | 1.24E-14  |
| CDKN2D     | 0.335759 | 4.90E-15  | 3.59E-14  |
| CDKN3      | 0.836389 | 4.72E-136 | 1.52E-133 |
| CDNF       | -0.29492 | 8.55E-12  | 4.54E-11  |
| CDO1       | -0.37653 | 8.60E-19  | 8.98E-18  |

|           |          |           |           |
|-----------|----------|-----------|-----------|
| CDON      | -0.24407 | 2.02E-08  | 7.42E-08  |
| CDR1      | -0.10355 | 1.87E-02  | 3.02E-02  |
| CDR2L     | 0.107569 | 1.46E-02  | 2.41E-02  |
| CDR2      | 0.170565 | 1.00E-04  | 2.34E-04  |
| CDRT15P   | -0.22449 | 2.63E-07  | 8.59E-07  |
| CDRT15    | -0.00208 | 9.62E-01  | 9.71E-01  |
| CDRT1     | 0.031723 | 4.73E-01  | 5.38E-01  |
| CDRT4     | -0.34436 | 8.75E-16  | 6.90E-15  |
| CDS1      | -0.3051  | 1.48E-12  | 8.55E-12  |
| CDS2      | -0.11289 | 1.04E-02  | 1.75E-02  |
| CDSN      | -0.16699 | 1.41E-04  | 3.20E-04  |
| CDT1      | 0.776159 | 8.09E-105 | 1.39E-102 |
| CDV3      | 0.256831 | 3.34E-09  | 1.35E-08  |
| CDX1      | 0.16248  | 2.13E-04  | 4.74E-04  |
| CDX2      | 0.176074 | 5.88E-05  | 1.42E-04  |
| CDY2B     | -0.06555 | 1.37E-01  | 1.83E-01  |
| CDYL2     | 0.044077 | 3.18E-01  | 3.83E-01  |
| CDYL      | 0.155627 | 3.93E-04  | 8.39E-04  |
| CEACAM16  | 0.012115 | 7.84E-01  | 8.21E-01  |
| CEACAM18  | -0.01354 | 7.59E-01  | 8.00E-01  |
| CEACAM19  | 0.137395 | 1.78E-03  | 3.43E-03  |
| CEACAM1   | -0.04773 | 2.80E-01  | 3.41E-01  |
| CEACAM20  | 0.018893 | 6.69E-01  | 7.20E-01  |
| CEACAM21  | -0.19656 | 7.00E-06  | 1.91E-05  |
| CEACAM22P | 0.063333 | 1.51E-01  | 1.99E-01  |
| CEACAM3   | -0.01708 | 6.99E-01  | 7.48E-01  |
| CEACAM4   | -0.20037 | 4.59E-06  | 1.29E-05  |
| CEACAM5   | -0.03599 | 4.15E-01  | 4.81E-01  |
| CEACAM6   | -0.27449 | 2.36E-10  | 1.08E-09  |
| CEACAM7   | -0.07409 | 9.30E-02  | 1.29E-01  |
| CEACAM8   | -0.37819 | 5.89E-19  | 6.22E-18  |
| CEBPA     | -0.36964 | 4.06E-18  | 3.99E-17  |
| CEBPB     | 0.084203 | 5.62E-02  | 8.20E-02  |
| CEBPD     | -0.29893 | 4.32E-12  | 2.37E-11  |
| CEBPE     | -0.01613 | 7.15E-01  | 7.62E-01  |
| CEBPG     | 0.380488 | 3.47E-19  | 3.76E-18  |
| CEBPZ     | 0.406562 | 6.41E-22  | 8.77E-21  |
| CECR1     | -0.19538 | 7.96E-06  | 2.16E-05  |
| CECR2     | -0.23205 | 1.00E-07  | 3.43E-07  |
| CECR4     | -0.15549 | 3.98E-04  | 8.48E-04  |
| CECR5     | 0.171382 | 9.28E-05  | 2.17E-04  |
| CECR6     | 0.07691  | 8.12E-02  | 1.14E-01  |
| CECR7     | 0.098262 | 2.58E-02  | 4.03E-02  |
| CELA1     | 0.029497 | 5.04E-01  | 5.69E-01  |

|         |          |           |           |
|---------|----------|-----------|-----------|
| CELA2A  | 0.042398 | 3.37E-01  | 4.02E-01  |
| CELA2B  | -0.0861  | 5.09E-02  | 7.49E-02  |
| CELA3A  | 0.02066  | 6.40E-01  | 6.94E-01  |
| CELA3B  | -0.03203 | 4.68E-01  | 5.34E-01  |
| CELF1   | -0.01992 | 6.52E-01  | 7.06E-01  |
| CELF2   | -0.49858 | 1.02E-33  | 3.28E-32  |
| CELF3   | -0.06947 | 1.15E-01  | 1.56E-01  |
| CELF4   | -0.00299 | 9.46E-01  | 9.58E-01  |
| CELF5   | -0.12881 | 3.41E-03  | 6.29E-03  |
| CELF6   | -0.31859 | 1.30E-13  | 8.32E-13  |
| CELP    | 0.02845  | 5.19E-01  | 5.83E-01  |
| CELSR1  | -0.31926 | 1.15E-13  | 7.39E-13  |
| CELSR2  | -0.14236 | 1.20E-03  | 2.38E-03  |
| CELSR3  | 0.258799 | 2.51E-09  | 1.03E-08  |
| CEL     | -0.02059 | 6.41E-01  | 6.95E-01  |
| CEMP1   | -0.22998 | 1.31E-07  | 4.43E-07  |
| CEND1   | 0.173333 | 7.69E-05  | 1.82E-04  |
| CENPA   | 0.895374 | 2.29E-182 | 7.64E-179 |
| CENPBD1 | 0.018279 | 6.79E-01  | 7.29E-01  |
| CENPB   | -0.0054  | 9.03E-01  | 9.21E-01  |
| CENPC1  | -0.20696 | 2.17E-06  | 6.31E-06  |
| CENPE   | 0.819531 | 3.80E-126 | 9.86E-124 |
| CENPF   | 0.74216  | 3.36E-91  | 4.76E-89  |
| CENPH   | 0.727137 | 7.56E-86  | 9.87E-84  |
| CENPI   | 0.83889  | 1.28E-137 | 4.50E-135 |
| CENPJ   | 0.279036 | 1.15E-10  | 5.45E-10  |
| CENPK   | 0.797196 | 1.63E-114 | 3.44E-112 |
| CENPL   | 0.696119 | 7.45E-76  | 8.61E-74  |
| CENPM   | 0.725645 | 2.46E-85  | 3.15E-83  |
| CENPN   | 0.753857 | 1.24E-95  | 1.85E-93  |
| CENPO   | 0.760635 | 2.56E-98  | 4.03E-96  |
| CENPP   | 0.506061 | 7.65E-35  | 2.59E-33  |
| CENPQ   | 0.488832 | 2.73E-32  | 8.11E-31  |
| CENPT   | -0.05743 | 1.93E-01  | 2.47E-01  |
| CENPV   | 0.006679 | 8.80E-01  | 9.03E-01  |
| CENPW   | 0.793435 | 1.07E-112 | 2.18E-110 |
| CEP110  | -0.0674  | 1.27E-01  | 1.70E-01  |
| CEP120  | -0.18047 | 3.80E-05  | 9.39E-05  |
| CEP135  | 0.326899 | 2.73E-14  | 1.86E-13  |
| CEP152  | 0.415155 | 7.11E-23  | 1.05E-21  |
| CEP164  | -0.02813 | 5.24E-01  | 5.88E-01  |
| CEP170L | 0.042634 | 3.34E-01  | 4.00E-01  |
| CEP170  | 0.106585 | 1.55E-02  | 2.54E-02  |
| CEP192  | 0.081273 | 6.53E-02  | 9.42E-02  |

|        |          |           |           |
|--------|----------|-----------|-----------|
| CEP250 | 0.131959 | 2.70E-03  | 5.05E-03  |
| CEP290 | 0.00768  | 8.62E-01  | 8.87E-01  |
| CEP350 | -0.04622 | 2.95E-01  | 3.58E-01  |
| CEP55  | 0.859243 | 1.90E-151 | 1.12E-148 |
| CEP57  | 0.080552 | 6.78E-02  | 9.74E-02  |
| CEP63  | 0.020087 | 6.49E-01  | 7.03E-01  |
| CEP68  | -0.35652 | 7.01E-17  | 6.17E-16  |
| CEP70  | -0.16222 | 2.18E-04  | 4.85E-04  |
| CEP72  | 0.30453  | 1.63E-12  | 9.41E-12  |
| CEP76  | 0.391156 | 2.83E-20  | 3.40E-19  |
| CEP78  | 0.546557 | 1.89E-41  | 9.28E-40  |
| CEP97  | 0.286332 | 3.56E-11  | 1.77E-10  |
| CEPT1  | -0.04105 | 3.52E-01  | 4.18E-01  |
| CER1   | 0.162002 | 2.23E-04  | 4.94E-04  |
| CERCAM | 0.169184 | 1.14E-04  | 2.64E-04  |
| CERKL  | -0.30531 | 1.43E-12  | 8.25E-12  |
| CERK   | -0.19436 | 8.90E-06  | 2.40E-05  |
| CES1   | -0.25453 | 4.66E-09  | 1.85E-08  |
| CES2   | -0.44684 | 1.21E-26  | 2.42E-25  |
| CES3   | -0.17828 | 4.73E-05  | 1.15E-04  |
| CES4   | -0.20306 | 3.40E-06  | 9.67E-06  |
| CES7   | -0.04284 | 3.32E-01  | 3.97E-01  |
| CES8   | -0.33957 | 2.30E-15  | 1.73E-14  |
| CETN1  | 0.048252 | 2.74E-01  | 3.36E-01  |
| CETN2  | -0.05779 | 1.90E-01  | 2.44E-01  |
| CETN3  | -0.07695 | 8.10E-02  | 1.14E-01  |
| CETN4P | 0.123281 | 5.09E-03  | 9.12E-03  |
| CETP   | -0.09547 | 3.03E-02  | 4.67E-02  |
| CFB    | -0.03287 | 4.57E-01  | 5.23E-01  |
| CFC1B  | -0.1161  | 8.36E-03  | 1.44E-02  |
| CFDP1  | -0.05418 | 2.20E-01  | 2.77E-01  |
| CFD    | -0.3297  | 1.60E-14  | 1.11E-13  |
| CFHR1  | 0.049761 | 2.60E-01  | 3.21E-01  |
| CFHR2  | 0.051358 | 2.45E-01  | 3.05E-01  |
| CFHR3  | -0.015   | 7.34E-01  | 7.78E-01  |
| CFHR4  | 0.102935 | 1.95E-02  | 3.13E-02  |
| CFHR5  | 0.159735 | 2.73E-04  | 5.98E-04  |
| CFH    | -0.09491 | 3.13E-02  | 4.81E-02  |
| CFI    | -0.37869 | 5.25E-19  | 5.59E-18  |
| CFL1   | 0.401097 | 2.51E-21  | 3.29E-20  |
| CFL2   | 0.205414 | 2.60E-06  | 7.47E-06  |
| CFLAR  | 0.019064 | 6.66E-01  | 7.18E-01  |
| CFLP1  | -0.13225 | 2.64E-03  | 4.95E-03  |
| CFP    | -0.26845 | 5.97E-10  | 2.62E-09  |

|         |          |           |           |
|---------|----------|-----------|-----------|
| CFTR    | -0.34045 | 1.93E-15  | 1.46E-14  |
| CG030   | -0.33903 | 2.56E-15  | 1.92E-14  |
| CGA     | 0.133716 | 2.36E-03  | 4.46E-03  |
| CGB1    | 0.088987 | 4.35E-02  | 6.50E-02  |
| CGB2    | 0.114919 | 9.05E-03  | 1.55E-02  |
| CGB5    | -0.03671 | 4.06E-01  | 4.72E-01  |
| CGB7    | -0.15307 | 4.90E-04  | 1.03E-03  |
| CGB8    | 0.081552 | 6.44E-02  | 9.30E-02  |
| CGB     | 0.043781 | 3.21E-01  | 3.86E-01  |
| CGGBP1  | -0.04451 | 3.13E-01  | 3.78E-01  |
| CGNL1   | -0.52209 | 2.37E-37  | 9.26E-36  |
| CGN     | -0.18615 | 2.13E-05  | 5.44E-05  |
| CGREF1  | 0.232659 | 9.27E-08  | 3.18E-07  |
| CGRRF1  | -0.0152  | 7.31E-01  | 7.75E-01  |
| CH25H   | -0.29088 | 1.68E-11  | 8.65E-11  |
| CHAC1   | 0.244173 | 1.99E-08  | 7.33E-08  |
| CHAC2   | 0.526739 | 4.19E-38  | 1.72E-36  |
| CHADL   | -0.48659 | 5.73E-32  | 1.66E-30  |
| CHAD    | -0.40448 | 1.08E-21  | 1.45E-20  |
| CHAF1A  | 0.642419 | 2.82E-61  | 2.53E-59  |
| CHAF1B  | 0.680459 | 2.79E-71  | 3.00E-69  |
| CHAT    | 0.032303 | 4.64E-01  | 5.30E-01  |
| CHCHD10 | 0.056994 | 1.97E-01  | 2.51E-01  |
| CHCHD1  | 0.094615 | 3.18E-02  | 4.88E-02  |
| CHCHD2  | 0.367246 | 6.88E-18  | 6.62E-17  |
| CHCHD3  | 0.557082 | 2.56E-43  | 1.39E-41  |
| CHCHD4  | 0.093436 | 3.40E-02  | 5.19E-02  |
| CHCHD5  | -0.0103  | 8.16E-01  | 8.48E-01  |
| CHCHD6  | 0.051893 | 2.40E-01  | 2.99E-01  |
| CHCHD7  | -0.0391  | 3.76E-01  | 4.42E-01  |
| CHCHD8  | 0.280764 | 8.76E-11  | 4.18E-10  |
| CHD1L   | 0.118247 | 7.22E-03  | 1.26E-02  |
| CHD1    | 0.096714 | 2.82E-02  | 4.37E-02  |
| CHD2    | -0.31024 | 5.94E-13  | 3.57E-12  |
| CHD3    | -0.2865  | 3.47E-11  | 1.72E-10  |
| CHD4    | 0.051213 | 2.46E-01  | 3.06E-01  |
| CHD5    | -0.03553 | 4.21E-01  | 4.87E-01  |
| CHD6    | -0.16322 | 1.99E-04  | 4.45E-04  |
| CHD7    | 0.179806 | 4.06E-05  | 9.99E-05  |
| CHD8    | 0.058186 | 1.87E-01  | 2.41E-01  |
| CHD9    | -0.32129 | 7.87E-14  | 5.15E-13  |
| CHDH    | -0.21949 | 4.89E-07  | 1.54E-06  |
| CHEK1   | 0.792617 | 2.62E-112 | 5.30E-110 |
| CHEK2   | 0.534207 | 2.44E-39  | 1.09E-37  |

|            |          |          |          |
|------------|----------|----------|----------|
| CHERP      | 0.118552 | 7.07E-03 | 1.23E-02 |
| CHFR       | 0.370324 | 3.48E-18 | 3.45E-17 |
| CHGA       | 0.050875 | 2.49E-01 | 3.09E-01 |
| CHGB       | 0.120795 | 6.06E-03 | 1.07E-02 |
| CHI3L1     | -0.07796 | 7.71E-02 | 1.09E-01 |
| CHI3L2     | -0.33423 | 6.61E-15 | 4.78E-14 |
| CHIA       | -0.53129 | 7.47E-39 | 3.23E-37 |
| CHIC1      | -0.17226 | 8.53E-05 | 2.01E-04 |
| CHIC2      | 0.123192 | 5.12E-03 | 9.17E-03 |
| CHID1      | -0.17647 | 5.65E-05 | 1.37E-04 |
| CHIT1      | -0.28737 | 3.01E-11 | 1.51E-10 |
| CHKA       | -0.28009 | 9.75E-11 | 4.64E-10 |
| CHKB-CPT1B | -0.24584 | 1.58E-08 | 5.89E-08 |
| CHKB       | -0.23151 | 1.08E-07 | 3.67E-07 |
| CHL1       | -0.18098 | 3.61E-05 | 8.94E-05 |
| CHML       | 0.130659 | 2.97E-03 | 5.53E-03 |
| CHMP1A     | 0.059517 | 1.77E-01 | 2.30E-01 |
| CHMP1B     | -0.01641 | 7.10E-01 | 7.58E-01 |
| CHMP2A     | -0.03824 | 3.87E-01 | 4.53E-01 |
| CHMP2B     | 0.209671 | 1.59E-06 | 4.69E-06 |
| CHMP4A     | 0.091767 | 3.74E-02 | 5.65E-02 |
| CHMP4B     | 0.116039 | 8.39E-03 | 1.44E-02 |
| CHMP4C     | 0.119799 | 6.49E-03 | 1.14E-02 |
| CHMP5      | 0.181393 | 3.46E-05 | 8.60E-05 |
| CHMP6      | -0.17962 | 4.14E-05 | 1.02E-04 |
| CHMP7      | -0.11057 | 1.20E-02 | 2.02E-02 |
| CHM        | 0.140302 | 1.41E-03 | 2.77E-03 |
| CHN1       | 0.174303 | 7.00E-05 | 1.67E-04 |
| CHN2       | -0.10368 | 1.86E-02 | 3.00E-02 |
| CHODL      | 0.054465 | 2.17E-01 | 2.74E-01 |
| CHORDC1    | 0.422636 | 9.94E-24 | 1.60E-22 |
| CHP2       | -0.09213 | 3.66E-02 | 5.55E-02 |
| CHPF2      | 0.06695  | 1.29E-01 | 1.73E-01 |
| CHPF       | 0.006758 | 8.78E-01 | 9.01E-01 |
| CHPT1      | -0.12781 | 3.67E-03 | 6.73E-03 |
| CHP        | -0.25065 | 8.09E-09 | 3.12E-08 |
| CHRAC1     | 0.194499 | 8.76E-06 | 2.36E-05 |
| CHRD1      | -0.47394 | 3.38E-30 | 8.83E-29 |
| CHRD2      | -0.20848 | 1.82E-06 | 5.35E-06 |
| CHRD       | -0.12528 | 4.41E-03 | 7.99E-03 |
| CHRFAM7A   | 0.051517 | 2.43E-01 | 3.03E-01 |
| CHRM1      | -0.3256  | 3.49E-14 | 2.36E-13 |
| CHRM2      | -0.19024 | 1.38E-05 | 3.63E-05 |
| CHRM3      | 0.035234 | 4.25E-01 | 4.91E-01 |

|         |          |          |          |
|---------|----------|----------|----------|
| CHRM4   | 0.179439 | 4.21E-05 | 1.03E-04 |
| CHRM5   | 0.123431 | 5.03E-03 | 9.03E-03 |
| CHRNA10 | -0.20292 | 3.45E-06 | 9.81E-06 |
| CHRNA1  | 0.047569 | 2.81E-01 | 3.43E-01 |
| CHRNA2  | -0.38579 | 1.01E-19 | 1.15E-18 |
| CHRNA3  | 0.042452 | 3.36E-01 | 4.02E-01 |
| CHRNA4  | -0.14254 | 1.18E-03 | 2.35E-03 |
| CHRNA5  | 0.326822 | 2.77E-14 | 1.89E-13 |
| CHRNA6  | -0.14655 | 8.51E-04 | 1.73E-03 |
| CHRNA7  | 0.049449 | 2.63E-01 | 3.24E-01 |
| CHRNA9  | 0.263094 | 1.33E-09 | 5.62E-09 |
| CHRNB1  | 0.053828 | 2.23E-01 | 2.80E-01 |
| CHRNB2  | 0.141765 | 1.26E-03 | 2.49E-03 |
| CHRNB3  | -0.26612 | 8.49E-10 | 3.66E-09 |
| CHRNB4  | 0.184417 | 2.54E-05 | 6.43E-05 |
| CHRND   | 0.117226 | 7.74E-03 | 1.34E-02 |
| CHRNE   | -0.03612 | 4.13E-01 | 4.80E-01 |
| CHRNG   | 0.045531 | 3.02E-01 | 3.66E-01 |
| CHST10  | -0.2103  | 1.47E-06 | 4.37E-06 |
| CHST11  | 0.298116 | 4.97E-12 | 2.71E-11 |
| CHST12  | -0.16345 | 1.95E-04 | 4.36E-04 |
| CHST13  | -0.02784 | 5.28E-01 | 5.92E-01 |
| CHST14  | -0.01572 | 7.22E-01 | 7.68E-01 |
| CHST15  | -0.04287 | 3.32E-01 | 3.97E-01 |
| CHST1   | 0.178427 | 4.66E-05 | 1.14E-04 |
| CHST2   | -0.07638 | 8.33E-02 | 1.17E-01 |
| CHST3   | 0.056219 | 2.03E-01 | 2.58E-01 |
| CHST4   | 0.07013  | 1.12E-01 | 1.52E-01 |
| CHST5   | -0.23362 | 8.17E-08 | 2.82E-07 |
| CHST6   | 0.086082 | 5.09E-02 | 7.49E-02 |
| CHST7   | -0.24373 | 2.11E-08 | 7.76E-08 |
| CHST8   | -0.2366  | 5.52E-08 | 1.93E-07 |
| CHST9   | -0.19559 | 7.78E-06 | 2.11E-05 |
| CHSY1   | 0.174802 | 6.66E-05 | 1.59E-04 |
| CHSY3   | -0.02789 | 5.28E-01 | 5.91E-01 |
| CHTF18  | 0.26693  | 7.51E-10 | 3.26E-09 |
| CHTF8   | -0.07948 | 7.15E-02 | 1.02E-01 |
| CHUK    | 0.242765 | 2.41E-08 | 8.79E-08 |
| CHURC1  | -0.15421 | 4.45E-04 | 9.40E-04 |
| CIAO1   | 0.166623 | 1.45E-04 | 3.31E-04 |
| CIAPIN1 | 0.198687 | 5.54E-06 | 1.54E-05 |
| CIB1    | 0.001119 | 9.80E-01 | 9.85E-01 |
| CIB2    | 0.340567 | 1.88E-15 | 1.43E-14 |
| CIB3    | 0.070038 | 1.12E-01 | 1.53E-01 |

|        |          |           |           |
|--------|----------|-----------|-----------|
| CIB4   | 0.076272 | 8.38E-02  | 1.18E-01  |
| CIC    | -0.16126 | 2.38E-04  | 5.26E-04  |
| CIDEA  | -0.05832 | 1.86E-01  | 2.40E-01  |
| CIDEB  | -0.17268 | 8.19E-05  | 1.93E-04  |
| CIDEC  | 0.149722 | 6.53E-04  | 1.35E-03  |
| CIDEC  | 0.166375 | 1.49E-04  | 3.38E-04  |
| CIITA  | -0.29185 | 1.43E-11  | 7.42E-11  |
| CILP2  | 0.069743 | 1.14E-01  | 1.55E-01  |
| CILP   | 0.097749 | 2.65E-02  | 4.14E-02  |
| CINP   | 0.168911 | 1.17E-04  | 2.71E-04  |
| CIR1   | -0.1285  | 3.49E-03  | 6.42E-03  |
| CIRBP  | -0.59386 | 2.11E-50  | 1.44E-48  |
| CIRH1A | 0.321684 | 7.31E-14  | 4.80E-13  |
| CISD1  | 0.298971 | 4.29E-12  | 2.36E-11  |
| CISD2  | 0.419317 | 2.39E-23  | 3.70E-22  |
| CISD3  | 0.00057  | 9.90E-01  | 9.92E-01  |
| CISH   | -0.49848 | 1.06E-33  | 3.39E-32  |
| CITED1 | -0.07002 | 1.12E-01  | 1.53E-01  |
| CITED2 | -0.45159 | 3.03E-27  | 6.41E-26  |
| CITED4 | -0.04123 | 3.50E-01  | 4.16E-01  |
| CIT    | -0.31874 | 1.26E-13  | 8.10E-13  |
| CIZ1   | 0.033515 | 4.48E-01  | 5.14E-01  |
| CKAP2L | 0.891289 | 2.45E-178 | 6.12E-175 |
| CKAP2  | 0.694719 | 1.96E-75  | 2.24E-73  |
| CKAP4  | 0.392969 | 1.83E-20  | 2.23E-19  |
| CKAP5  | 0.44974  | 5.21E-27  | 1.07E-25  |
| CKB    | -0.19968 | 4.96E-06  | 1.38E-05  |
| CKLF   | 0.202006 | 3.82E-06  | 1.08E-05  |
| CKMT1A | 0.057722 | 1.91E-01  | 2.45E-01  |
| CKMT1B | 0.101964 | 2.06E-02  | 3.30E-02  |
| CKMT2  | -0.22146 | 3.84E-07  | 1.23E-06  |
| CKM    | 0.113357 | 1.00E-02  | 1.70E-02  |
| CKS1B  | 0.637395 | 4.64E-60  | 3.99E-58  |
| CKS2   | 0.653873 | 3.89E-64  | 3.70E-62  |
| CLASP1 | 0.017188 | 6.97E-01  | 7.46E-01  |
| CLASP2 | -0.11598 | 8.43E-03  | 1.45E-02  |
| CLCA1  | 0.046662 | 2.91E-01  | 3.53E-01  |
| CLCA2  | -0.05963 | 1.77E-01  | 2.29E-01  |
| CLCA3P | 0.21258  | 1.13E-06  | 3.39E-06  |
| CLCA4  | -0.03149 | 4.76E-01  | 5.41E-01  |
| CLCC1  | -0.23099 | 1.15E-07  | 3.91E-07  |
| CLCF1  | 0.061786 | 1.61E-01  | 2.11E-01  |
| CLCN1  | 0.141037 | 1.33E-03  | 2.63E-03  |
| CLCN2  | 0.174014 | 7.19E-05  | 1.71E-04  |



|         |          |          |          |
|---------|----------|----------|----------|
| CLCN3   | 0.022964 | 6.03E-01 | 6.60E-01 |
| CLCN4   | 0.055583 | 2.08E-01 | 2.64E-01 |
| CLCN5   | -0.13664 | 1.88E-03 | 3.62E-03 |
| CLCN6   | -0.37867 | 5.28E-19 | 5.61E-18 |
| CLCN7   | -0.19988 | 4.85E-06 | 1.36E-05 |
| CLCNKA  | -0.32031 | 9.45E-14 | 6.13E-13 |
| CLCNKB  | -0.27486 | 2.22E-10 | 1.03E-09 |
| CLC     | 0.056294 | 2.02E-01 | 2.57E-01 |
| CLDN10  | 0.071788 | 1.04E-01 | 1.42E-01 |
| CLDN11  | -0.07285 | 9.87E-02 | 1.36E-01 |
| CLDN12  | 0.22866  | 1.55E-07 | 5.19E-07 |
| CLDN14  | 0.285793 | 3.89E-11 | 1.92E-10 |
| CLDN15  | -0.10556 | 1.66E-02 | 2.70E-02 |
| CLDN16  | -0.17827 | 4.73E-05 | 1.16E-04 |
| CLDN17  | 0.035514 | 4.21E-01 | 4.87E-01 |
| CLDN18  | -0.30815 | 8.63E-13 | 5.11E-12 |
| CLDN19  | 0.112203 | 1.08E-02 | 1.83E-02 |
| CLDN1   | -0.02167 | 6.24E-01 | 6.80E-01 |
| CLDN20  | -0.1162  | 8.30E-03 | 1.43E-02 |
| CLDN22  | 0.015713 | 7.22E-01 | 7.68E-01 |
| CLDN23  | -0.35023 | 2.63E-16 | 2.18E-15 |
| CLDN25  | 0.047664 | 2.80E-01 | 3.42E-01 |
| CLDN2   | -0.34603 | 6.23E-16 | 4.99E-15 |
| CLDN3   | -0.06882 | 1.19E-01 | 1.61E-01 |
| CLDN4   | -0.03499 | 4.28E-01 | 4.94E-01 |
| CLDN5   | -0.2168  | 6.79E-07 | 2.10E-06 |
| CLDN6   | 0.02003  | 6.50E-01 | 7.04E-01 |
| CLDN7   | -0.09245 | 3.59E-02 | 5.46E-02 |
| CLDN8   | -0.20557 | 2.55E-06 | 7.35E-06 |
| CLDN9   | -0.11922 | 6.76E-03 | 1.18E-02 |
| CLDND1  | 0.346515 | 5.64E-16 | 4.54E-15 |
| CLDND2  | -0.15411 | 4.48E-04 | 9.48E-04 |
| CLEC10A | -0.19911 | 5.28E-06 | 1.47E-05 |
| CLEC11A | -0.08907 | 4.33E-02 | 6.47E-02 |
| CLEC12A | -0.12041 | 6.22E-03 | 1.10E-02 |
| CLEC12B | -0.17515 | 6.44E-05 | 1.54E-04 |
| CLEC14A | -0.40362 | 1.34E-21 | 1.78E-20 |
| CLEC16A | -0.38705 | 7.50E-20 | 8.62E-19 |
| CLEC17A | -0.14277 | 1.16E-03 | 2.30E-03 |
| CLEC18A | -0.03094 | 4.84E-01 | 5.49E-01 |
| CLEC18B | -0.01297 | 7.69E-01 | 8.08E-01 |
| CLEC18C | 0.085976 | 5.12E-02 | 7.53E-02 |
| CLEC1A  | -0.25068 | 8.06E-09 | 3.11E-08 |
| CLEC1B  | -0.10135 | 2.14E-02 | 3.41E-02 |

|          |          |          |          |
|----------|----------|----------|----------|
| CLEC2A   | 0.057    | 1.97E-01 | 2.51E-01 |
| CLEC2B   | 0.135713 | 2.02E-03 | 3.88E-03 |
| CLEC2D   | -0.00334 | 9.40E-01 | 9.53E-01 |
| CLEC2L   | 0.105638 | 1.65E-02 | 2.69E-02 |
| CLEC3A   | -0.11149 | 1.13E-02 | 1.91E-02 |
| CLEC3B   | -0.43849 | 1.30E-25 | 2.42E-24 |
| CLEC4A   | -0.03821 | 3.87E-01 | 4.53E-01 |
| CLEC4C   | 0.057788 | 1.90E-01 | 2.44E-01 |
| CLEC4D   | 0.207055 | 2.15E-06 | 6.25E-06 |
| CLEC4E   | 0.180887 | 3.64E-05 | 9.02E-05 |
| CLEC4F   | -0.48789 | 3.73E-32 | 1.10E-30 |
| CLEC4GP1 | -0.14781 | 7.66E-04 | 1.57E-03 |
| CLEC4G   | -0.05667 | 1.99E-01 | 2.54E-01 |
| CLEC4M   | -0.01743 | 6.93E-01 | 7.42E-01 |
| CLEC5A   | -0.03067 | 4.87E-01 | 5.52E-01 |
| CLEC6A   | 0.246693 | 1.41E-08 | 5.26E-08 |
| CLEC7A   | -0.00888 | 8.41E-01 | 8.70E-01 |
| CLEC9A   | -0.31871 | 1.27E-13 | 8.14E-13 |
| CLECL1   | -0.18047 | 3.80E-05 | 9.38E-05 |
| CLGN     | 0.350976 | 2.25E-16 | 1.88E-15 |
| CLIC1    | 0.29702  | 5.99E-12 | 3.24E-11 |
| CLIC2    | -0.21237 | 1.15E-06 | 3.47E-06 |
| CLIC3    | -0.41852 | 2.95E-23 | 4.52E-22 |
| CLIC4    | 0.19385  | 9.40E-06 | 2.53E-05 |
| CLIC5    | -0.4223  | 1.09E-23 | 1.73E-22 |
| CLIC6    | -0.37115 | 2.90E-18 | 2.89E-17 |
| CLINT1   | -0.20483 | 2.78E-06 | 7.97E-06 |
| CLIP1    | 0.215411 | 8.03E-07 | 2.46E-06 |
| CLIP2    | 0.061118 | 1.66E-01 | 2.16E-01 |
| CLIP3    | -0.00942 | 8.31E-01 | 8.61E-01 |
| CLIP4    | -0.00681 | 8.77E-01 | 9.01E-01 |
| CLK1     | -0.27425 | 2.45E-10 | 1.12E-09 |
| CLK2P    | -0.03405 | 4.41E-01 | 5.07E-01 |
| CLK2     | -0.08108 | 6.60E-02 | 9.50E-02 |
| CLK3     | -0.13212 | 2.66E-03 | 5.00E-03 |
| CLK4     | -0.46479 | 5.81E-29 | 1.39E-27 |
| CLLU1OS  | 0.124457 | 4.68E-03 | 8.44E-03 |
| CLLU1    | 0.068627 | 1.20E-01 | 1.62E-01 |
| CLMN     | 0.102575 | 1.99E-02 | 3.19E-02 |
| CLN3     | -0.31383 | 3.11E-13 | 1.93E-12 |
| CLN5     | -0.28538 | 4.16E-11 | 2.04E-10 |
| CLN6     | 0.124674 | 4.60E-03 | 8.32E-03 |
| CLN8     | -0.13205 | 2.68E-03 | 5.02E-03 |
| CLNK     | -0.10211 | 2.05E-02 | 3.27E-02 |

|         |          |           |           |
|---------|----------|-----------|-----------|
| CLNS1A  | 0.293878 | 1.02E-11  | 5.37E-11  |
| CLOCK   | 0.089302 | 4.28E-02  | 6.40E-02  |
| CLP1    | 0.155664 | 3.92E-04  | 8.36E-04  |
| CLPB    | 0.368531 | 5.18E-18  | 5.03E-17  |
| CLPP    | 0.133181 | 2.46E-03  | 4.64E-03  |
| CLPS    | 0.096388 | 2.87E-02  | 4.45E-02  |
| CLPTM1L | -0.15857 | 3.03E-04  | 6.58E-04  |
| CLPTM1  | 0.028391 | 5.20E-01  | 5.84E-01  |
| CLPX    | 0.091783 | 3.73E-02  | 5.65E-02  |
| CLRN1OS | -0.07972 | 7.07E-02  | 1.01E-01  |
| CLRN1   | 0.026633 | 5.46E-01  | 6.09E-01  |
| CLRN2   | -0.08452 | 5.53E-02  | 8.07E-02  |
| CLRN3   | -0.10965 | 1.28E-02  | 2.13E-02  |
| CLSPN   | 0.778139 | 1.10E-105 | 1.94E-103 |
| CLSTN1  | 0.097269 | 2.73E-02  | 4.25E-02  |
| CLSTN2  | 0.009124 | 8.36E-01  | 8.66E-01  |
| CLSTN3  | 0.050956 | 2.48E-01  | 3.09E-01  |
| CLTA    | 0.131802 | 2.73E-03  | 5.11E-03  |
| CLTB    | -0.02928 | 5.07E-01  | 5.72E-01  |
| CLTCL1  | 0.236013 | 5.97E-08  | 2.08E-07  |
| CLTC    | 0.218314 | 5.65E-07  | 1.77E-06  |
| CLUAP1  | -0.41887 | 2.70E-23  | 4.15E-22  |
| CLUL1   | -0.42077 | 1.63E-23  | 2.56E-22  |
| CLU     | -0.45409 | 1.45E-27  | 3.14E-26  |
| CLVS1   | 0.021537 | 6.26E-01  | 6.82E-01  |
| CLVS2   | 0.161529 | 2.32E-04  | 5.14E-04  |
| CLYBL   | -0.21311 | 1.06E-06  | 3.19E-06  |
| CMA1    | -0.3489  | 3.45E-16  | 2.83E-15  |
| CMAH    | -0.46501 | 5.44E-29  | 1.31E-27  |
| CMAS    | 0.507413 | 4.76E-35  | 1.63E-33  |
| CMBL    | 0.102834 | 1.96E-02  | 3.14E-02  |
| CMC1    | 0.169494 | 1.11E-04  | 2.57E-04  |
| CMIP    | 0.038812 | 3.79E-01  | 4.46E-01  |
| CMKLR1  | -0.06625 | 1.33E-01  | 1.78E-01  |
| CMPK1   | -0.09047 | 4.01E-02  | 6.04E-02  |
| CMPK2   | 0.132426 | 2.60E-03  | 4.89E-03  |
| CMTM1   | 0.207339 | 2.08E-06  | 6.06E-06  |
| CMTM2   | -0.0381  | 3.88E-01  | 4.55E-01  |
| CMTM3   | 0.193291 | 9.98E-06  | 2.67E-05  |
| CMTM4   | -0.20413 | 3.00E-06  | 8.60E-06  |
| CMTM5   | -0.35211 | 1.78E-16  | 1.50E-15  |
| CMTM6   | 0.085739 | 5.18E-02  | 7.62E-02  |
| CMTM7   | -0.23703 | 5.21E-08  | 1.83E-07  |
| CMTM8   | -0.09954 | 2.39E-02  | 3.76E-02  |

|         |          |          |          |
|---------|----------|----------|----------|
| CMYA5   | -0.27757 | 1.45E-10 | 6.82E-10 |
| CN5H6.4 | 0.104906 | 1.72E-02 | 2.80E-02 |
| CNBD1   | 0.034555 | 4.34E-01 | 5.00E-01 |
| CNBP    | 0.238024 | 4.57E-08 | 1.62E-07 |
| CNDP1   | -0.00622 | 8.88E-01 | 9.09E-01 |
| CNDP2   | -0.15007 | 6.34E-04 | 1.31E-03 |
| CNFN    | 0.05878  | 1.83E-01 | 2.36E-01 |
| CNGA1   | -0.13625 | 1.94E-03 | 3.73E-03 |
| CNGA2   | 0.086586 | 4.95E-02 | 7.31E-02 |
| CNGA3   | -0.21801 | 5.86E-07 | 1.83E-06 |
| CNGA4   | -0.33733 | 3.59E-15 | 2.66E-14 |
| CNGB1   | -0.14821 | 7.41E-04 | 1.52E-03 |
| CNGB3   | 0.204531 | 2.87E-06 | 8.23E-06 |
| CNIH2   | 0.352454 | 1.65E-16 | 1.40E-15 |
| CNIH3   | -0.02945 | 5.05E-01 | 5.69E-01 |
| CNIH4   | -0.10362 | 1.87E-02 | 3.01E-02 |
| CNIH    | 0.298993 | 4.27E-12 | 2.35E-11 |
| CNKSR1  | -0.30188 | 2.59E-12 | 1.46E-11 |
| CNKSR2  | -0.3116  | 4.65E-13 | 2.83E-12 |
| CNKSR3  | 0.097881 | 2.63E-02 | 4.11E-02 |
| CNN1    | -0.17313 | 7.84E-05 | 1.85E-04 |
| CNN2    | -0.14174 | 1.26E-03 | 2.49E-03 |
| CNN3    | 0.014824 | 7.37E-01 | 7.81E-01 |
| CNNM1   | -0.03659 | 4.07E-01 | 4.74E-01 |
| CNNM2   | -0.17207 | 8.68E-05 | 2.04E-04 |
| CNNM3   | -0.38637 | 8.81E-20 | 1.01E-18 |
| CNNM4   | 0.034252 | 4.38E-01 | 5.05E-01 |
| CNOT10  | 0.252527 | 6.20E-09 | 2.43E-08 |
| CNOT1   | 0.024524 | 5.79E-01 | 6.38E-01 |
| CNOT2   | 0.129706 | 3.19E-03 | 5.92E-03 |
| CNOT3   | 0.087246 | 4.78E-02 | 7.08E-02 |
| CNOT4   | 0.014755 | 7.38E-01 | 7.82E-01 |
| CNOT6L  | -0.18616 | 2.12E-05 | 5.44E-05 |
| CNOT6   | 0.007063 | 8.73E-01 | 8.97E-01 |
| CNOT7   | 0.14925  | 6.79E-04 | 1.40E-03 |
| CNOT8   | -0.19835 | 5.75E-06 | 1.59E-05 |
| CNO     | 0.173397 | 7.64E-05 | 1.81E-04 |
| CNPY1   | 0.006035 | 8.91E-01 | 9.12E-01 |
| CNPY2   | 0.177875 | 4.92E-05 | 1.20E-04 |
| CNPY3   | 0.031159 | 4.80E-01 | 5.46E-01 |
| CNPY4   | 0.099812 | 2.35E-02 | 3.71E-02 |
| CNP     | 0.318267 | 1.38E-13 | 8.82E-13 |
| CNR1    | -0.29858 | 4.58E-12 | 2.51E-11 |
| CNR2    | -0.22376 | 2.88E-07 | 9.36E-07 |

|         |          |          |          |
|---------|----------|----------|----------|
| CNRIP1  | -0.26051 | 1.95E-09 | 8.08E-09 |
| CNST    | -0.24517 | 1.74E-08 | 6.43E-08 |
| CNTD1   | -0.24206 | 2.65E-08 | 9.64E-08 |
| CNTD2   | 0.170688 | 9.91E-05 | 2.31E-04 |
| CNTFR   | -0.38349 | 1.73E-19 | 1.94E-18 |
| CNTF    | -0.00619 | 8.89E-01 | 9.10E-01 |
| CNTLN   | 0.229791 | 1.34E-07 | 4.53E-07 |
| CNTN1   | 0.025781 | 5.59E-01 | 6.20E-01 |
| CNTN2   | -0.1587  | 2.99E-04 | 6.51E-04 |
| CNTN3   | -0.33354 | 7.57E-15 | 5.43E-14 |
| CNTN4   | -0.31941 | 1.12E-13 | 7.19E-13 |
| CNTN5   | -0.02652 | 5.48E-01 | 6.10E-01 |
| CNTN6   | -0.34623 | 5.99E-16 | 4.81E-15 |
| CNTNAP1 | -0.13867 | 1.61E-03 | 3.12E-03 |
| CNTNAP2 | 0.14944  | 6.68E-04 | 1.38E-03 |
| CNTNAP3 | 0.007444 | 8.66E-01 | 8.91E-01 |
| CNTNAP4 | 0.193803 | 9.45E-06 | 2.54E-05 |
| CNTNAP5 | 0.074022 | 9.33E-02 | 1.30E-01 |
| CNTROB  | -0.3898  | 3.91E-20 | 4.63E-19 |
| COASY   | 0.210634 | 1.42E-06 | 4.21E-06 |
| COBLL1  | -0.36427 | 1.32E-17 | 1.24E-16 |
| COBL    | -0.13366 | 2.37E-03 | 4.48E-03 |
| COBRA1  | 0.106325 | 1.58E-02 | 2.58E-02 |
| COCH    | 0.430492 | 1.19E-24 | 2.05E-23 |
| COG1    | -0.09796 | 2.62E-02 | 4.09E-02 |
| COG2    | -0.08807 | 4.58E-02 | 6.81E-02 |
| COG3    | -0.11638 | 8.20E-03 | 1.41E-02 |
| COG4    | -0.08628 | 5.04E-02 | 7.42E-02 |
| COG5    | 0.300523 | 3.28E-12 | 1.83E-11 |
| COG6    | 0.084363 | 5.57E-02 | 8.14E-02 |
| COG7    | -0.34143 | 1.58E-15 | 1.21E-14 |
| COG8    | -0.20892 | 1.73E-06 | 5.10E-06 |
| COIL    | 0.3531   | 1.44E-16 | 1.23E-15 |
| COL10A1 | -0.02234 | 6.13E-01 | 6.70E-01 |
| COL11A1 | 0.401327 | 2.37E-21 | 3.10E-20 |
| COL11A2 | -0.02517 | 5.69E-01 | 6.29E-01 |
| COL12A1 | 0.260229 | 2.04E-09 | 8.40E-09 |
| COL13A1 | -0.24087 | 3.12E-08 | 1.12E-07 |
| COL14A1 | -0.33703 | 3.81E-15 | 2.82E-14 |
| COL15A1 | 0.143915 | 1.06E-03 | 2.11E-03 |
| COL16A1 | -0.13458 | 2.21E-03 | 4.20E-03 |
| COL17A1 | -0.10401 | 1.82E-02 | 2.94E-02 |
| COL18A1 | -0.07349 | 9.57E-02 | 1.32E-01 |
| COL19A1 | -0.19051 | 1.34E-05 | 3.54E-05 |

|          |          |          |          |
|----------|----------|----------|----------|
| COL1A1   | 0.212975 | 1.07E-06 | 3.24E-06 |
| COL1A2   | 0.159569 | 2.77E-04 | 6.06E-04 |
| COL20A1  | 0.115988 | 8.42E-03 | 1.45E-02 |
| COL21A1  | -0.32004 | 9.92E-14 | 6.43E-13 |
| COL22A1  | 0.16601  | 1.54E-04 | 3.49E-04 |
| COL23A1  | -0.06836 | 1.21E-01 | 1.64E-01 |
| COL24A1  | -0.04748 | 2.82E-01 | 3.44E-01 |
| COL25A1  | -0.1836  | 2.76E-05 | 6.96E-05 |
| COL27A1  | -0.26069 | 1.90E-09 | 7.88E-09 |
| COL28A1  | -0.20655 | 2.28E-06 | 6.60E-06 |
| COL29A1  | -0.31954 | 1.09E-13 | 7.03E-13 |
| COL2A1   | 0.119315 | 6.71E-03 | 1.18E-02 |
| COL3A1   | 0.21987  | 4.67E-07 | 1.48E-06 |
| COL4A1   | 0.120614 | 6.13E-03 | 1.08E-02 |
| COL4A2   | 0.043968 | 3.19E-01 | 3.84E-01 |
| COL4A3BP | -0.29731 | 5.70E-12 | 3.09E-11 |
| COL4A3   | -0.44193 | 4.93E-26 | 9.51E-25 |
| COL4A4   | -0.41514 | 7.13E-23 | 1.05E-21 |
| COL4A5   | -0.16569 | 1.59E-04 | 3.59E-04 |
| COL4A6   | -0.17541 | 6.28E-05 | 1.51E-04 |
| COL5A1   | 0.125432 | 4.36E-03 | 7.91E-03 |
| COL5A2   | 0.268462 | 5.96E-10 | 2.62E-09 |
| COL5A3   | 0.162256 | 2.18E-04 | 4.84E-04 |
| COL6A1   | 0.104524 | 1.77E-02 | 2.86E-02 |
| COL6A2   | 0.07907  | 7.30E-02 | 1.04E-01 |
| COL6A3   | 0.05305  | 2.29E-01 | 2.88E-01 |
| COL6A4P2 | -0.17865 | 4.56E-05 | 1.12E-04 |
| COL6A6   | -0.36573 | 9.60E-18 | 9.15E-17 |
| COL7A1   | 0.253217 | 5.62E-09 | 2.21E-08 |
| COL8A1   | -0.10234 | 2.02E-02 | 3.23E-02 |
| COL8A2   | -0.08155 | 6.44E-02 | 9.30E-02 |
| COL9A1   | -0.09743 | 2.70E-02 | 4.21E-02 |
| COL9A2   | -0.23733 | 5.01E-08 | 1.76E-07 |
| COL9A3   | 0.020898 | 6.36E-01 | 6.91E-01 |
| COLEC10  | -0.05771 | 1.91E-01 | 2.45E-01 |
| COLEC11  | -0.04199 | 3.42E-01 | 4.07E-01 |
| COLEC12  | -0.33604 | 4.64E-15 | 3.41E-14 |
| COLQ     | -0.22531 | 2.38E-07 | 7.78E-07 |
| COMMD10  | -0.00211 | 9.62E-01 | 9.70E-01 |
| COMMD1   | 0.148733 | 7.09E-04 | 1.46E-03 |
| COMMD2   | 0.314533 | 2.74E-13 | 1.70E-12 |
| COMMD3   | 0.062699 | 1.55E-01 | 2.04E-01 |
| COMMD4   | 0.112394 | 1.07E-02 | 1.81E-02 |
| COMMD5   | 0.091395 | 3.81E-02 | 5.76E-02 |

|        |          |          |          |
|--------|----------|----------|----------|
| COMMD6 | -0.14682 | 8.32E-04 | 1.69E-03 |
| COMMD7 | 0.069873 | 1.13E-01 | 1.54E-01 |
| COMMD8 | 0.342429 | 1.30E-15 | 9.99E-15 |
| COMMD9 | 0.099355 | 2.41E-02 | 3.80E-02 |
| COMP   | -0.13876 | 1.60E-03 | 3.10E-03 |
| COMTD1 | 0.177364 | 5.18E-05 | 1.26E-04 |
| COMT   | -0.14377 | 1.07E-03 | 2.14E-03 |
| COPA   | 0.071222 | 1.06E-01 | 1.45E-01 |
| COPB1  | 0.156953 | 3.50E-04 | 7.53E-04 |
| COPB2  | 0.333541 | 7.57E-15 | 5.43E-14 |
| COPE   | 0.12748  | 3.76E-03 | 6.88E-03 |
| COPG2  | 0.129146 | 3.33E-03 | 6.15E-03 |
| COPG   | 0.199384 | 5.13E-06 | 1.43E-05 |
| COPS2  | 0.177582 | 5.07E-05 | 1.23E-04 |
| COPS3  | 0.335636 | 5.02E-15 | 3.67E-14 |
| COPS4  | 0.091593 | 3.77E-02 | 5.70E-02 |
| COPS5  | 0.227273 | 1.85E-07 | 6.14E-07 |
| COPS6  | 0.398714 | 4.52E-21 | 5.81E-20 |
| COPS7A | 0.053645 | 2.24E-01 | 2.82E-01 |
| COPS7B | 0.295583 | 7.64E-12 | 4.08E-11 |
| COPS8  | 0.397934 | 5.48E-21 | 6.98E-20 |
| COPZ1  | 0.213687 | 9.87E-07 | 2.99E-06 |
| COPZ2  | 0.001855 | 9.67E-01 | 9.74E-01 |
| COQ10A | -0.10079 | 2.22E-02 | 3.52E-02 |
| COQ10B | 0.118767 | 6.97E-03 | 1.22E-02 |
| COQ2   | 0.266392 | 8.15E-10 | 3.52E-09 |
| COQ3   | 0.345756 | 6.59E-16 | 5.27E-15 |
| COQ4   | -0.33215 | 9.93E-15 | 7.06E-14 |
| COQ5   | 0.299557 | 3.88E-12 | 2.15E-11 |
| COQ6   | -0.10185 | 2.08E-02 | 3.32E-02 |
| COQ7   | -0.28321 | 5.92E-11 | 2.87E-10 |
| COQ9   | -0.03368 | 4.46E-01 | 5.12E-01 |
| CORIN  | -0.04843 | 2.73E-01 | 3.35E-01 |
| CORO1A | -0.05077 | 2.50E-01 | 3.11E-01 |
| CORO1B | 0.025773 | 5.60E-01 | 6.20E-01 |
| CORO1C | 0.400346 | 3.03E-21 | 3.93E-20 |
| CORO2A | -0.21074 | 1.40E-06 | 4.16E-06 |
| CORO2B | -0.46783 | 2.28E-29 | 5.63E-28 |
| CORO6  | 0.112272 | 1.08E-02 | 1.82E-02 |
| CORO7  | -0.17792 | 4.90E-05 | 1.19E-04 |
| CORT   | -0.06817 | 1.22E-01 | 1.65E-01 |
| COTL1  | 0.135517 | 2.06E-03 | 3.93E-03 |
| COX10  | 0.064818 | 1.42E-01 | 1.88E-01 |
| COX11  | 0.060981 | 1.67E-01 | 2.18E-01 |

|         |          |          |          |
|---------|----------|----------|----------|
| COX15   | 0.047998 | 2.77E-01 | 3.39E-01 |
| COX16   | 0.064215 | 1.46E-01 | 1.92E-01 |
| COX17   | 0.226458 | 2.06E-07 | 6.78E-07 |
| COX18   | -0.11707 | 7.83E-03 | 1.35E-02 |
| COX19   | -0.0057  | 8.97E-01 | 9.17E-01 |
| COX4I1  | 0.014801 | 7.38E-01 | 7.81E-01 |
| COX4I2  | -0.33698 | 3.85E-15 | 2.84E-14 |
| COX4NB  | 0.31645  | 1.93E-13 | 1.22E-12 |
| COX5A   | 0.240272 | 3.38E-08 | 1.21E-07 |
| COX5B   | 0.194599 | 8.67E-06 | 2.34E-05 |
| COX6A1  | 0.23646  | 5.63E-08 | 1.97E-07 |
| COX6A2  | 0.12304  | 5.17E-03 | 9.26E-03 |
| COX6B1  | 0.260753 | 1.89E-09 | 7.82E-09 |
| COX6B2  | 0.158225 | 3.13E-04 | 6.78E-04 |
| COX6C   | 0.104116 | 1.81E-02 | 2.93E-02 |
| COX7A1  | -0.28852 | 2.49E-11 | 1.26E-10 |
| COX7A2L | 0.281251 | 8.10E-11 | 3.89E-10 |
| COX7A2  | 0.269672 | 4.95E-10 | 2.20E-09 |
| COX7B2  | 0.261473 | 1.70E-09 | 7.06E-09 |
| COX7B   | 0.214208 | 9.28E-07 | 2.82E-06 |
| COX7C   | -0.05454 | 2.17E-01 | 2.73E-01 |
| COX8A   | 0.241415 | 2.90E-08 | 1.05E-07 |
| COX8C   | 0.023712 | 5.91E-01 | 6.49E-01 |
| CP110   | -0.16916 | 1.15E-04 | 2.65E-04 |
| CPA1    | 0.004731 | 9.15E-01 | 9.32E-01 |
| CPA2    | 0.090157 | 4.08E-02 | 6.14E-02 |
| CPA3    | -0.30448 | 1.65E-12 | 9.49E-12 |
| CPA4    | 0.268335 | 6.07E-10 | 2.66E-09 |
| CPA5    | 0.088846 | 4.39E-02 | 6.55E-02 |
| CPA6    | -0.15525 | 4.06E-04 | 8.64E-04 |
| CPAMD8  | -0.52574 | 6.08E-38 | 2.49E-36 |
| CPB1    | 0.03857  | 3.82E-01 | 4.49E-01 |
| CPB2    | -0.3341  | 6.79E-15 | 4.90E-14 |
| CPD     | 0.411365 | 1.89E-22 | 2.69E-21 |
| CPEB1   | -0.14137 | 1.30E-03 | 2.56E-03 |
| CPEB2   | -0.27699 | 1.59E-10 | 7.44E-10 |
| CPEB3   | -0.35088 | 2.29E-16 | 1.91E-15 |
| CPEB4   | -0.3352  | 5.46E-15 | 3.99E-14 |
| CPE     | 0.191267 | 1.24E-05 | 3.28E-05 |
| CPLX1   | 0.166443 | 1.48E-04 | 3.36E-04 |
| CPLX2   | 0.143671 | 1.08E-03 | 2.15E-03 |
| CPLX3   | 0.039493 | 3.71E-01 | 4.37E-01 |
| CPLX4   | 0.113188 | 1.01E-02 | 1.72E-02 |
| CPM     | -0.31107 | 5.12E-13 | 3.10E-12 |



|         |          |          |          |
|---------|----------|----------|----------|
| CPN1    | 0.144719 | 9.89E-04 | 1.99E-03 |
| CPN2    | 0.072313 | 1.01E-01 | 1.39E-01 |
| CPNE1   | 0.151993 | 5.38E-04 | 1.12E-03 |
| CPNE2   | -0.34542 | 7.07E-16 | 5.63E-15 |
| CPNE3   | -0.09838 | 2.56E-02 | 4.00E-02 |
| CPNE4   | -0.04023 | 3.62E-01 | 4.29E-01 |
| CPNE5   | -0.06691 | 1.29E-01 | 1.73E-01 |
| CPNE6   | -0.00098 | 9.82E-01 | 9.86E-01 |
| CPNE7   | -0.10714 | 1.50E-02 | 2.46E-02 |
| CPNE8   | 0.081708 | 6.39E-02 | 9.23E-02 |
| CPNE9   | -0.12059 | 6.15E-03 | 1.09E-02 |
| CPOX    | 0.225577 | 2.30E-07 | 7.54E-07 |
| CPO     | -0.25199 | 6.69E-09 | 2.61E-08 |
| CPPED1  | -0.03653 | 4.08E-01 | 4.75E-01 |
| CPS1    | 0.131728 | 2.74E-03 | 5.14E-03 |
| CPSF1   | -0.00202 | 9.64E-01 | 9.71E-01 |
| CPSF2   | 0.398178 | 5.16E-21 | 6.60E-20 |
| CPSF3L  | -0.12948 | 3.24E-03 | 6.01E-03 |
| CPSF3   | 0.625405 | 3.02E-57 | 2.46E-55 |
| CPSF4L  | 0.130838 | 2.93E-03 | 5.47E-03 |
| CPSF4   | 0.370265 | 3.53E-18 | 3.49E-17 |
| CPSF6   | 0.176534 | 5.62E-05 | 1.36E-04 |
| CPSF7   | 0.078595 | 7.47E-02 | 1.06E-01 |
| CPT1A   | -0.05967 | 1.76E-01 | 2.28E-01 |
| CPT1B   | -0.14407 | 1.04E-03 | 2.09E-03 |
| CPT1C   | 0.263702 | 1.22E-09 | 5.16E-09 |
| CPT2    | -0.29635 | 6.71E-12 | 3.61E-11 |
| CPVL    | -0.07841 | 7.54E-02 | 1.07E-01 |
| CPXCR1  | 0.028804 | 5.14E-01 | 5.78E-01 |
| CPXM1   | 0.216311 | 7.21E-07 | 2.23E-06 |
| CPXM2   | -0.17283 | 8.07E-05 | 1.91E-04 |
| CPZ     | -0.07283 | 9.88E-02 | 1.36E-01 |
| CP      | 0.066101 | 1.34E-01 | 1.79E-01 |
| CR1L    | 0.170839 | 9.77E-05 | 2.28E-04 |
| CR1     | -0.16771 | 1.31E-04 | 3.01E-04 |
| CR2     | -0.18209 | 3.23E-05 | 8.04E-05 |
| CRABP1  | 0.211458 | 1.29E-06 | 3.84E-06 |
| CRABP2  | 0.125853 | 4.23E-03 | 7.69E-03 |
| CRADD   | -0.08682 | 4.89E-02 | 7.23E-02 |
| CRAMP1L | -0.28617 | 3.66E-11 | 1.81E-10 |
| CRAT    | -0.14754 | 7.84E-04 | 1.60E-03 |
| CRB1    | -0.10253 | 1.99E-02 | 3.20E-02 |
| CRB2    | -0.18618 | 2.12E-05 | 5.43E-05 |
| CRB3    | -0.23728 | 5.04E-08 | 1.77E-07 |

|          |          |          |          |
|----------|----------|----------|----------|
| CRBN     | -0.23471 | 7.09E-08 | 2.46E-07 |
| CRCP     | 0.114442 | 9.34E-03 | 1.59E-02 |
| CRCT1    | 0.067973 | 1.23E-01 | 1.66E-01 |
| CREB1    | -0.06953 | 1.15E-01 | 1.56E-01 |
| CREB3L1  | -0.25677 | 3.37E-09 | 1.36E-08 |
| CREB3L2  | 0.00999  | 8.21E-01 | 8.53E-01 |
| CREB3L3  | 0.103974 | 1.83E-02 | 2.95E-02 |
| CREB3L4  | -0.11405 | 9.58E-03 | 1.63E-02 |
| CREB3    | 0.024092 | 5.85E-01 | 6.44E-01 |
| CREB5    | -0.02532 | 5.66E-01 | 6.26E-01 |
| CREBBP   | -0.27398 | 2.55E-10 | 1.17E-09 |
| CREBL2   | -0.31328 | 3.43E-13 | 2.12E-12 |
| CREBZF   | -0.06124 | 1.65E-01 | 2.15E-01 |
| CREG1    | -0.15884 | 2.96E-04 | 6.44E-04 |
| CREG2    | 0.306872 | 1.08E-12 | 6.32E-12 |
| CRELD1   | -0.36635 | 8.38E-18 | 8.01E-17 |
| CRELD2   | -0.08949 | 4.24E-02 | 6.34E-02 |
| CREM     | 0.217977 | 5.89E-07 | 1.84E-06 |
| CRHBP    | -0.26977 | 4.88E-10 | 2.16E-09 |
| CRHR1    | -0.01104 | 8.03E-01 | 8.37E-01 |
| CRHR2    | -0.1673  | 1.37E-04 | 3.12E-04 |
| CRH      | -0.04194 | 3.42E-01 | 4.08E-01 |
| CRIM1    | -0.17352 | 7.55E-05 | 1.79E-04 |
| CRIP1    | -0.17086 | 9.76E-05 | 2.28E-04 |
| CRIP2    | -0.22378 | 2.88E-07 | 9.35E-07 |
| CRIP3    | 0.009461 | 8.30E-01 | 8.60E-01 |
| CRIPAK   | -0.2297  | 1.36E-07 | 4.58E-07 |
| CRIPT    | 0.302204 | 2.45E-12 | 1.39E-11 |
| CRISP1   | -0.02113 | 6.32E-01 | 6.88E-01 |
| CRISP2   | -0.12814 | 3.58E-03 | 6.58E-03 |
| CRISP3   | 0.023858 | 5.89E-01 | 6.47E-01 |
| CRISPLD1 | -0.01349 | 7.60E-01 | 8.00E-01 |
| CRISPLD2 | -0.00263 | 9.53E-01 | 9.62E-01 |
| CRKL     | 0.196338 | 7.17E-06 | 1.96E-05 |
| CRK      | -0.0473  | 2.84E-01 | 3.46E-01 |
| CRLF1    | -0.26395 | 1.18E-09 | 4.98E-09 |
| CRLF2    | 0.061511 | 1.63E-01 | 2.13E-01 |
| CRLF3    | 0.199665 | 4.97E-06 | 1.39E-05 |
| CRLS1    | -0.21822 | 5.71E-07 | 1.79E-06 |
| CRMP1    | -0.10643 | 1.57E-02 | 2.57E-02 |
| CRNKL1   | 0.118203 | 7.25E-03 | 1.26E-02 |
| CRNN     | 0.097322 | 2.72E-02 | 4.23E-02 |
| CROCCL1  | -0.2605  | 1.96E-09 | 8.10E-09 |
| CROCCL2  | -0.36939 | 4.29E-18 | 4.21E-17 |

|        |          |          |          |
|--------|----------|----------|----------|
| CROCC  | -0.35949 | 3.72E-17 | 3.39E-16 |
| CROT   | -0.10589 | 1.62E-02 | 2.65E-02 |
| CRP    | 0.092519 | 3.58E-02 | 5.44E-02 |
| CRTAC1 | -0.38636 | 8.82E-20 | 1.01E-18 |
| CRTAM  | -0.00324 | 9.41E-01 | 9.54E-01 |
| CRTAP  | -0.26223 | 1.52E-09 | 6.36E-09 |
| CRTC1  | -0.39435 | 1.31E-20 | 1.61E-19 |
| CRTC2  | -0.07602 | 8.48E-02 | 1.19E-01 |
| CRTC3  | -0.0995  | 2.39E-02 | 3.77E-02 |
| CRX    | 0.056546 | 2.00E-01 | 2.55E-01 |
| CRY1   | 0.206685 | 2.24E-06 | 6.51E-06 |
| CRY2   | -0.70181 | 1.36E-77 | 1.62E-75 |
| CRYAA  | -0.06015 | 1.73E-01 | 2.25E-01 |
| CRYAB  | -0.17949 | 4.19E-05 | 1.03E-04 |
| CRYBA1 | -0.07732 | 7.96E-02 | 1.12E-01 |
| CRYBA2 | 0.210983 | 1.36E-06 | 4.05E-06 |
| CRYBA4 | -0.0054  | 9.03E-01 | 9.21E-01 |
| CRYBB1 | -0.05497 | 2.13E-01 | 2.69E-01 |
| CRYBB2 | -0.0607  | 1.69E-01 | 2.20E-01 |
| CRYBB3 | -0.12042 | 6.22E-03 | 1.10E-02 |
| CRYBG3 | 0.001108 | 9.80E-01 | 9.85E-01 |
| CRYGA  | 0.019327 | 6.62E-01 | 7.14E-01 |
| CRYGB  | 0.114185 | 9.50E-03 | 1.62E-02 |
| CRYGC  | 0.08761  | 4.69E-02 | 6.95E-02 |
| CRYGD  | 0.049852 | 2.59E-01 | 3.20E-01 |
| CRYGN  | -0.00317 | 9.43E-01 | 9.55E-01 |
| CRYGS  | -0.2061  | 2.40E-06 | 6.93E-06 |
| CRYL1  | -0.22951 | 1.39E-07 | 4.69E-07 |
| CRYM   | -0.4807  | 3.90E-31 | 1.08E-29 |
| CRYZL1 | -0.12024 | 6.29E-03 | 1.11E-02 |
| CRYZ   | -0.14738 | 7.94E-04 | 1.62E-03 |
| CSAD   | -0.31504 | 2.50E-13 | 1.56E-12 |
| CSAG1  | 0.314132 | 2.94E-13 | 1.83E-12 |
| CSAG2  | 0.2809   | 8.57E-11 | 4.10E-10 |
| CSAG3  | 0.363746 | 1.48E-17 | 1.39E-16 |
| CSDAP1 | 0.120756 | 6.07E-03 | 1.07E-02 |
| CSDA   | 0.11933  | 6.71E-03 | 1.17E-02 |
| CSDC2  | -0.28232 | 6.82E-11 | 3.29E-10 |
| CSDE1  | 0.041436 | 3.48E-01 | 4.14E-01 |
| CSE1L  | 0.570174 | 9.75E-46 | 5.84E-44 |
| CSF1R  | -0.09248 | 3.59E-02 | 5.46E-02 |
| CSF1   | -0.04639 | 2.93E-01 | 3.56E-01 |
| CSF2RA | -0.05522 | 2.11E-01 | 2.67E-01 |
| CSF2RB | -0.10853 | 1.37E-02 | 2.27E-02 |

|            |          |          |          |
|------------|----------|----------|----------|
| CSF2       | -0.14076 | 1.36E-03 | 2.68E-03 |
| CSF3R      | -0.17724 | 5.24E-05 | 1.27E-04 |
| CSF3       | -0.02952 | 5.04E-01 | 5.68E-01 |
| CSGALNACT1 | 0.025518 | 5.63E-01 | 6.24E-01 |
| CSGALNACT2 | -0.04873 | 2.70E-01 | 3.32E-01 |
| CSH1       | 0.098207 | 2.58E-02 | 4.04E-02 |
| CSH2       | 0.183148 | 2.89E-05 | 7.27E-05 |
| CSK        | 0.118237 | 7.23E-03 | 1.26E-02 |
| CSMD1      | -0.10501 | 1.71E-02 | 2.78E-02 |
| CSMD2      | 0.152139 | 5.31E-04 | 1.11E-03 |
| CSMD3      | 0.012991 | 7.69E-01 | 8.08E-01 |
| CSN1S1     | 0.00217  | 9.61E-01 | 9.69E-01 |
| CSN2       | 0.000344 | 9.94E-01 | 9.95E-01 |
| CSN3       | -0.12118 | 5.90E-03 | 1.05E-02 |
| CSNK1A1L   | 0.001583 | 9.71E-01 | 9.78E-01 |
| CSNK1A1P   | 0.067911 | 1.24E-01 | 1.67E-01 |
| CSNK1A1    | -0.05815 | 1.88E-01 | 2.41E-01 |
| CSNK1D     | -0.10772 | 1.45E-02 | 2.38E-02 |
| CSNK1E     | 0.110991 | 1.17E-02 | 1.97E-02 |
| CSNK1G1    | 0.110008 | 1.25E-02 | 2.08E-02 |
| CSNK1G2    | 0.096625 | 2.83E-02 | 4.40E-02 |
| CSNK1G3    | -0.02577 | 5.60E-01 | 6.20E-01 |
| CSNK2A1P   | 0.25458  | 4.63E-09 | 1.83E-08 |
| CSNK2A1    | 0.240359 | 3.34E-08 | 1.20E-07 |
| CSNK2A2    | 0.073266 | 9.67E-02 | 1.34E-01 |
| CSNK2B     | 0.223043 | 3.16E-07 | 1.02E-06 |
| CSPG4PY2   | 0.037146 | 4.00E-01 | 4.67E-01 |
| CSPG4      | -0.12318 | 5.12E-03 | 9.18E-03 |
| CSPG5      | 0.004244 | 9.23E-01 | 9.39E-01 |
| CSPP1      | -0.01914 | 6.65E-01 | 7.17E-01 |
| CSRNP1     | -0.34558 | 6.83E-16 | 5.45E-15 |
| CSRNP2     | 0.162208 | 2.18E-04 | 4.85E-04 |
| CSRNP3     | 0.030725 | 4.87E-01 | 5.51E-01 |
| CSRP1      | -0.29127 | 1.58E-11 | 8.13E-11 |
| CSRP2BP    | -0.07537 | 8.75E-02 | 1.22E-01 |
| CSRP2      | 0.273407 | 2.79E-10 | 1.28E-09 |
| CSRP3      | 0.118155 | 7.27E-03 | 1.26E-02 |
| CST11      | 0.062698 | 1.55E-01 | 2.04E-01 |
| CST1       | -0.03062 | 4.88E-01 | 5.53E-01 |
| CST2       | -0.18337 | 2.83E-05 | 7.11E-05 |
| CST3       | -0.5072  | 5.14E-35 | 1.76E-33 |
| CST4       | -0.00791 | 8.58E-01 | 8.84E-01 |
| CST5       | -0.50794 | 3.95E-35 | 1.36E-33 |
| CST6       | 0.04291  | 3.31E-01 | 3.97E-01 |

|         |          |          |          |
|---------|----------|----------|----------|
| CST7    | -0.04569 | 3.01E-01 | 3.64E-01 |
| CST9L   | 0.062751 | 1.55E-01 | 2.04E-01 |
| CST9    | 0.069646 | 1.14E-01 | 1.55E-01 |
| CSTA    | 0.036614 | 4.07E-01 | 4.73E-01 |
| CSTB    | 0.087019 | 4.84E-02 | 7.16E-02 |
| CSTF1   | 0.182253 | 3.17E-05 | 7.92E-05 |
| CSTF2T  | 0.039671 | 3.69E-01 | 4.35E-01 |
| CSTF2   | 0.481031 | 3.51E-31 | 9.72E-30 |
| CSTF3   | 0.439185 | 1.07E-25 | 2.00E-24 |
| CSTL1   | -0.04752 | 2.82E-01 | 3.44E-01 |
| CSTT    | 0.008187 | 8.53E-01 | 8.80E-01 |
| CS      | 0.321697 | 7.29E-14 | 4.79E-13 |
| CT45A1  | 0.12867  | 3.44E-03 | 6.35E-03 |
| CT45A2  | 0.187335 | 1.88E-05 | 4.85E-05 |
| CT45A3  | 0.141586 | 1.28E-03 | 2.52E-03 |
| CT45A4  | 0.186898 | 1.97E-05 | 5.06E-05 |
| CT45A5  | 0.207471 | 2.05E-06 | 5.97E-06 |
| CT45A6  | 0.123108 | 5.15E-03 | 9.22E-03 |
| CT47A11 | 0.034575 | 4.34E-01 | 5.00E-01 |
| CT47A1  | 0.078883 | 7.37E-02 | 1.05E-01 |
| CT47A2  | 0.108026 | 1.42E-02 | 2.34E-02 |
| CT47A6  | 0.122289 | 5.45E-03 | 9.73E-03 |
| CT47B1  | 0.120879 | 6.02E-03 | 1.07E-02 |
| CT62    | -0.13653 | 1.90E-03 | 3.65E-03 |
| CTAG1B  | 0.24483  | 1.82E-08 | 6.73E-08 |
| CTAG2   | 0.234697 | 7.10E-08 | 2.46E-07 |
| CTAGE1  | 0.055175 | 2.11E-01 | 2.67E-01 |
| CTAGE4  | -0.09763 | 2.67E-02 | 4.17E-02 |
| CTAGE5  | 0.047117 | 2.86E-01 | 3.48E-01 |
| CTAGE6  | -0.09071 | 3.96E-02 | 5.97E-02 |
| CTAGE9  | -0.07868 | 7.44E-02 | 1.06E-01 |
| CTBP1   | -0.09318 | 3.45E-02 | 5.26E-02 |
| CTBP2   | 0.16904  | 1.16E-04 | 2.68E-04 |
| CTBS    | 0.128161 | 3.58E-03 | 6.57E-03 |
| CTCFL   | 0.249055 | 1.01E-08 | 3.86E-08 |
| CTCF    | 0.019212 | 6.64E-01 | 7.16E-01 |
| CTDP1   | -0.06303 | 1.53E-01 | 2.01E-01 |
| CTDSP1  | -0.42478 | 5.61E-24 | 9.16E-23 |
| CTDSP2  | -0.15373 | 4.63E-04 | 9.77E-04 |
| CTDSPL2 | 0.299359 | 4.01E-12 | 2.22E-11 |
| CTDSPL  | -0.4642  | 6.96E-29 | 1.66E-27 |
| CTF1    | -0.43793 | 1.52E-25 | 2.81E-24 |
| CTGF    | -0.16874 | 1.19E-04 | 2.75E-04 |
| CTHRC1  | 0.41198  | 1.61E-22 | 2.32E-21 |

|           |          |          |          |
|-----------|----------|----------|----------|
| CTH       | 0.011498 | 7.95E-01 | 8.30E-01 |
| CTLA4     | 0.084435 | 5.55E-02 | 8.11E-02 |
| CTNNA1    | -0.19347 | 9.79E-06 | 2.62E-05 |
| CTNNA2    | 0.027736 | 5.30E-01 | 5.93E-01 |
| CTNNA3    | -0.0866  | 4.95E-02 | 7.31E-02 |
| CTNNAL1   | 0.23187  | 1.03E-07 | 3.50E-07 |
| CTNNB1    | 0.002334 | 9.58E-01 | 9.67E-01 |
| CTNNBIP1  | -0.34057 | 1.88E-15 | 1.43E-14 |
| CTNNBL1   | 0.291771 | 1.45E-11 | 7.51E-11 |
| CTNND1    | -0.0909  | 3.92E-02 | 5.91E-02 |
| CTNND2    | -0.01819 | 6.81E-01 | 7.31E-01 |
| CTNS      | -0.255   | 4.35E-09 | 1.73E-08 |
| CTPS2     | -0.00278 | 9.50E-01 | 9.61E-01 |
| CTPS      | 0.529676 | 1.38E-38 | 5.85E-37 |
| CTR9      | -0.07565 | 8.63E-02 | 1.21E-01 |
| CTRB1     | 0.037997 | 3.90E-01 | 4.56E-01 |
| CTRB2     | -0.0129  | 7.70E-01 | 8.09E-01 |
| CTRC      | 0.019432 | 6.60E-01 | 7.13E-01 |
| CTRL      | 0.087609 | 4.69E-02 | 6.95E-02 |
| CTSA      | 0.048189 | 2.75E-01 | 3.37E-01 |
| CTSB      | 0.194887 | 8.40E-06 | 2.27E-05 |
| CTSC      | 0.181299 | 3.49E-05 | 8.68E-05 |
| CTSD      | -0.36641 | 8.27E-18 | 7.92E-17 |
| CTSE      | -0.34675 | 5.37E-16 | 4.33E-15 |
| CTSF      | -0.34547 | 6.99E-16 | 5.57E-15 |
| CTSG      | -0.39468 | 1.21E-20 | 1.50E-19 |
| CTSH      | -0.56024 | 6.84E-44 | 3.81E-42 |
| CTSK      | 0.054368 | 2.18E-01 | 2.75E-01 |
| CTSL1     | 0.345335 | 7.18E-16 | 5.72E-15 |
| CTSL2     | 0.678114 | 1.28E-70 | 1.35E-68 |
| CTSL3     | 0.053367 | 2.27E-01 | 2.85E-01 |
| CTSO      | -0.39558 | 9.72E-21 | 1.21E-19 |
| CTSS      | -0.15503 | 4.14E-04 | 8.80E-04 |
| CTSW      | -0.07323 | 9.69E-02 | 1.34E-01 |
| CTSZ      | -0.20996 | 1.53E-06 | 4.54E-06 |
| CTTNBP2NL | -0.02519 | 5.68E-01 | 6.28E-01 |
| CTTNBP2   | -0.20007 | 4.75E-06 | 1.33E-05 |
| CTTN      | -0.11523 | 8.86E-03 | 1.52E-02 |
| CTU1      | 0.123262 | 5.09E-03 | 9.13E-03 |
| CTU2      | 0.199428 | 5.10E-06 | 1.42E-05 |
| CTXN1     | 0.132851 | 2.52E-03 | 4.74E-03 |
| CTXN2     | 0.146282 | 8.70E-04 | 1.76E-03 |
| CTXN3     | -0.03645 | 4.09E-01 | 4.76E-01 |
| CUBN      | -0.35863 | 4.47E-17 | 4.03E-16 |

|         |          |          |          |
|---------|----------|----------|----------|
| CUEDC1  | 0.009548 | 8.29E-01 | 8.59E-01 |
| CUEDC2  | 0.016537 | 7.08E-01 | 7.56E-01 |
| CUL1    | 0.201645 | 3.98E-06 | 1.12E-05 |
| CUL2    | 0.453522 | 1.72E-27 | 3.70E-26 |
| CUL3    | 0.057784 | 1.90E-01 | 2.44E-01 |
| CUL4A   | 0.016005 | 7.17E-01 | 7.64E-01 |
| CUL4B   | 0.290195 | 1.89E-11 | 9.65E-11 |
| CUL5    | -0.04712 | 2.86E-01 | 3.48E-01 |
| CUL7    | -0.04049 | 3.59E-01 | 4.25E-01 |
| CUL9    | -0.2421  | 2.64E-08 | 9.59E-08 |
| CUTA    | -0.19319 | 1.01E-05 | 2.70E-05 |
| CUTC    | -0.01993 | 6.52E-01 | 7.05E-01 |
| CUX1    | -0.15988 | 2.70E-04 | 5.91E-04 |
| CUX2    | -0.06554 | 1.37E-01 | 1.83E-01 |
| CUZD1   | 0.071756 | 1.04E-01 | 1.42E-01 |
| CWC15   | 0.139697 | 1.48E-03 | 2.90E-03 |
| CWC22   | 0.200249 | 4.65E-06 | 1.30E-05 |
| CWC25   | -0.10395 | 1.83E-02 | 2.95E-02 |
| CWC27   | 0.215527 | 7.92E-07 | 2.43E-06 |
| CWF19L1 | 0.201543 | 4.03E-06 | 1.14E-05 |
| CWF19L2 | -0.05625 | 2.02E-01 | 2.58E-01 |
| CWH43   | -0.16942 | 1.12E-04 | 2.59E-04 |
| CX3CL1  | -0.25824 | 2.73E-09 | 1.11E-08 |
| CX3CR1  | -0.45022 | 4.54E-27 | 9.40E-26 |
| CXADRP2 | -0.05623 | 2.03E-01 | 2.58E-01 |
| CXADRP3 | 0.003384 | 9.39E-01 | 9.52E-01 |
| CXADR   | -0.09677 | 2.81E-02 | 4.36E-02 |
| CXCL10  | 0.349667 | 2.95E-16 | 2.43E-15 |
| CXCL11  | 0.269766 | 4.88E-10 | 2.17E-09 |
| CXCL12  | -0.17809 | 4.82E-05 | 1.18E-04 |
| CXCL13  | 0.07186  | 1.03E-01 | 1.42E-01 |
| CXCL14  | -0.23759 | 4.84E-08 | 1.70E-07 |
| CXCL16  | -0.43735 | 1.79E-25 | 3.28E-24 |
| CXCL17  | -0.3922  | 2.20E-20 | 2.66E-19 |
| CXCL1   | 0.087637 | 4.68E-02 | 6.95E-02 |
| CXCL2   | -0.1341  | 2.29E-03 | 4.34E-03 |
| CXCL3   | 0.040502 | 3.59E-01 | 4.25E-01 |
| CXCL5   | 0.215226 | 8.21E-07 | 2.52E-06 |
| CXCL6   | 0.146674 | 8.42E-04 | 1.71E-03 |
| CXCL9   | 0.212992 | 1.07E-06 | 3.23E-06 |
| CXCR1   | -0.09279 | 3.53E-02 | 5.37E-02 |
| CXCR2P1 | 0.129555 | 3.23E-03 | 5.98E-03 |
| CXCR2   | -0.16431 | 1.80E-04 | 4.05E-04 |
| CXCR3   | -0.02329 | 5.98E-01 | 6.56E-01 |

|          |          |          |          |
|----------|----------|----------|----------|
| CXCR4    | -0.04456 | 3.13E-01 | 3.77E-01 |
| CXCR5    | -0.15561 | 3.93E-04 | 8.40E-04 |
| CXCR6    | 0.043285 | 3.27E-01 | 3.92E-01 |
| CXCR7    | 0.12745  | 3.77E-03 | 6.90E-03 |
| CXXC1    | -0.09649 | 2.86E-02 | 4.43E-02 |
| CXXC4    | -0.13231 | 2.62E-03 | 4.93E-03 |
| CXXC5    | -0.18756 | 1.83E-05 | 4.74E-05 |
| CXorf1   | -0.18731 | 1.88E-05 | 4.86E-05 |
| CXorf21  | -0.22552 | 2.31E-07 | 7.59E-07 |
| CXorf22  | -0.20681 | 2.21E-06 | 6.42E-06 |
| CXorf23  | -0.30193 | 2.57E-12 | 1.45E-11 |
| CXorf26  | 0.152431 | 5.18E-04 | 1.09E-03 |
| CXorf27  | 0.076176 | 8.42E-02 | 1.18E-01 |
| CXorf30  | -0.2435  | 2.18E-08 | 7.99E-08 |
| CXorf36  | -0.27374 | 2.65E-10 | 1.21E-09 |
| CXorf38  | 0.125127 | 4.46E-03 | 8.07E-03 |
| CXorf40A | 0.089307 | 4.28E-02 | 6.40E-02 |
| CXorf40B | 0.25242  | 6.29E-09 | 2.46E-08 |
| CXorf41  | -0.25334 | 5.52E-09 | 2.17E-08 |
| CXorf42  | -0.18369 | 2.74E-05 | 6.90E-05 |
| CXorf48  | 0.130208 | 3.07E-03 | 5.71E-03 |
| CXorf49B | 0.085826 | 5.16E-02 | 7.58E-02 |
| CXorf50B | -0.3182  | 1.40E-13 | 8.92E-13 |
| CXorf51  | 0.083374 | 5.87E-02 | 8.53E-02 |
| CXorf56  | 0.161629 | 2.30E-04 | 5.10E-04 |
| CXorf57  | -0.02109 | 6.33E-01 | 6.88E-01 |
| CXorf58  | 0.080112 | 6.93E-02 | 9.93E-02 |
| CXorf59  | -0.22978 | 1.35E-07 | 4.54E-07 |
| CXorf61  | 0.121085 | 5.94E-03 | 1.05E-02 |
| CXorf64  | -0.1463  | 8.69E-04 | 1.76E-03 |
| CXorf65  | -0.08675 | 4.91E-02 | 7.25E-02 |
| CXorf66  | 0.054721 | 2.15E-01 | 2.72E-01 |
| CYB561D1 | -0.15517 | 4.09E-04 | 8.70E-04 |
| CYB561D2 | -0.14074 | 1.36E-03 | 2.68E-03 |
| CYB561   | -0.22857 | 1.57E-07 | 5.25E-07 |
| CYB5A    | -0.4328  | 6.33E-25 | 1.11E-23 |
| CYB5B    | 0.068241 | 1.22E-01 | 1.64E-01 |
| CYB5D1   | -0.31087 | 5.31E-13 | 3.21E-12 |
| CYB5D2   | -0.42267 | 9.86E-24 | 1.58E-22 |
| CYB5R1   | -0.37614 | 9.40E-19 | 9.76E-18 |
| CYB5R2   | -0.03362 | 4.46E-01 | 5.13E-01 |
| CYB5R3   | -0.40473 | 1.02E-21 | 1.36E-20 |
| CYB5R4   | 0.198346 | 5.75E-06 | 1.59E-05 |
| CYB5RL   | -0.03321 | 4.52E-01 | 5.18E-01 |



|          |          |          |          |
|----------|----------|----------|----------|
| CYBASC3  | -0.18735 | 1.87E-05 | 4.84E-05 |
| CYBA     | -0.06782 | 1.24E-01 | 1.67E-01 |
| CYBB     | -0.03626 | 4.12E-01 | 4.78E-01 |
| CYBRD1   | -0.53357 | 3.12E-39 | 1.38E-37 |
| CYC1     | 0.271743 | 3.61E-10 | 1.63E-09 |
| CYCSP52  | -0.10022 | 2.29E-02 | 3.63E-02 |
| CYCS     | 0.520523 | 4.23E-37 | 1.63E-35 |
| CYFIP1   | 0.047294 | 2.84E-01 | 3.46E-01 |
| CYFIP2   | -0.39505 | 1.11E-20 | 1.38E-19 |
| CYGB     | -0.27066 | 4.26E-10 | 1.90E-09 |
| CYHR1    | -0.21971 | 4.76E-07 | 1.50E-06 |
| CYLC1    | 0.04798  | 2.77E-01 | 3.39E-01 |
| CYLC2    | -0.02035 | 6.45E-01 | 6.99E-01 |
| CYLD     | -0.29553 | 7.71E-12 | 4.11E-11 |
| CYMP     | -0.19362 | 9.63E-06 | 2.58E-05 |
| CYP11A1  | -0.15011 | 6.32E-04 | 1.31E-03 |
| CYP11B1  | 0.072514 | 1.00E-01 | 1.38E-01 |
| CYP11B2  | 0.025834 | 5.59E-01 | 6.20E-01 |
| CYP17A1  | -0.28154 | 7.73E-11 | 3.71E-10 |
| CYP19A1  | 0.089232 | 4.30E-02 | 6.42E-02 |
| CYP1A1   | -0.02792 | 5.27E-01 | 5.91E-01 |
| CYP1A2   | -0.18226 | 3.17E-05 | 7.92E-05 |
| CYP1B1   | 0.015362 | 7.28E-01 | 7.73E-01 |
| CYP20A1  | -0.37474 | 1.29E-18 | 1.33E-17 |
| CYP21A2  | -0.33432 | 6.50E-15 | 4.70E-14 |
| CYP24A1  | 0.177687 | 5.02E-05 | 1.22E-04 |
| CYP26A1  | 0.025682 | 5.61E-01 | 6.22E-01 |
| CYP26B1  | 0.136091 | 1.97E-03 | 3.77E-03 |
| CYP26C1  | 0.032984 | 4.55E-01 | 5.21E-01 |
| CYP27A1  | -0.31862 | 1.29E-13 | 8.28E-13 |
| CYP27B1  | 0.123653 | 4.95E-03 | 8.91E-03 |
| CYP27C1  | 0.057106 | 1.96E-01 | 2.50E-01 |
| CYP2A13  | -0.14887 | 7.01E-04 | 1.44E-03 |
| CYP2A6   | -0.36602 | 9.01E-18 | 8.59E-17 |
| CYP2A7   | -0.17228 | 8.51E-05 | 2.00E-04 |
| CYP2B6   | -0.28473 | 4.62E-11 | 2.26E-10 |
| CYP2B7P1 | -0.57832 | 2.68E-47 | 1.70E-45 |
| CYP2C18  | -0.13434 | 2.25E-03 | 4.27E-03 |
| CYP2C19  | -0.05811 | 1.88E-01 | 2.41E-01 |
| CYP2C8   | -0.15806 | 3.17E-04 | 6.87E-04 |
| CYP2C9   | -0.06769 | 1.25E-01 | 1.68E-01 |
| CYP2D6   | -0.17265 | 8.21E-05 | 1.94E-04 |
| CYP2D7P1 | -0.10981 | 1.26E-02 | 2.11E-02 |
| CYP2E1   | -0.12174 | 5.67E-03 | 1.01E-02 |

|          |          |          |          |
|----------|----------|----------|----------|
| CYP2F1   | -0.21825 | 5.70E-07 | 1.78E-06 |
| CYP2J2   | -0.06567 | 1.37E-01 | 1.82E-01 |
| CYP2R1   | -0.24866 | 1.07E-08 | 4.06E-08 |
| CYP2S1   | -0.14091 | 1.35E-03 | 2.65E-03 |
| CYP2U1   | -0.28371 | 5.46E-11 | 2.65E-10 |
| CYP2W1   | -0.02614 | 5.54E-01 | 6.15E-01 |
| CYP39A1  | -0.27482 | 2.24E-10 | 1.03E-09 |
| CYP3A43  | -0.0717  | 1.04E-01 | 1.43E-01 |
| CYP3A4   | -0.00255 | 9.54E-01 | 9.63E-01 |
| CYP3A5   | -0.15088 | 5.92E-04 | 1.23E-03 |
| CYP3A7   | -0.29352 | 1.08E-11 | 5.69E-11 |
| CYP46A1  | -0.22859 | 1.57E-07 | 5.24E-07 |
| CYP4A11  | -0.44715 | 1.11E-26 | 2.22E-25 |
| CYP4A22  | -0.37972 | 4.15E-19 | 4.45E-18 |
| CYP4B1   | -0.59975 | 1.27E-51 | 8.95E-50 |
| CYP4F11  | 0.0085   | 8.47E-01 | 8.75E-01 |
| CYP4F12  | -0.15726 | 3.40E-04 | 7.34E-04 |
| CYP4F22  | -0.06829 | 1.22E-01 | 1.64E-01 |
| CYP4F2   | 0.113557 | 9.91E-03 | 1.68E-02 |
| CYP4F3   | 0.187254 | 1.89E-05 | 4.89E-05 |
| CYP4F8   | 0.122867 | 5.24E-03 | 9.37E-03 |
| CYP4V2   | -0.37839 | 5.63E-19 | 5.96E-18 |
| CYP4X1   | -0.44    | 8.51E-26 | 1.60E-24 |
| CYP4Z1   | -0.49355 | 5.64E-33 | 1.73E-31 |
| CYP4Z2P  | -0.57764 | 3.63E-47 | 2.29E-45 |
| CYP51A1  | 0.078122 | 7.65E-02 | 1.09E-01 |
| CYP7A1   | -0.2287  | 1.55E-07 | 5.17E-07 |
| CYP7B1   | -0.10684 | 1.53E-02 | 2.51E-02 |
| CYP8B1   | -0.0237  | 5.92E-01 | 6.50E-01 |
| CYR61    | -0.08522 | 5.33E-02 | 7.81E-02 |
| CYS1     | -0.29362 | 1.06E-11 | 5.60E-11 |
| CYSLTR1  | -0.2632  | 1.31E-09 | 5.54E-09 |
| CYSLTR2  | -0.0197  | 6.56E-01 | 7.09E-01 |
| CYTH1    | -0.2211  | 4.01E-07 | 1.28E-06 |
| CYTH2    | -0.20244 | 3.64E-06 | 1.03E-05 |
| CYTH3    | -0.23741 | 4.96E-08 | 1.75E-07 |
| CYTH4    | -0.05516 | 2.11E-01 | 2.68E-01 |
| CYTIP    | -0.0673  | 1.27E-01 | 1.71E-01 |
| CYTL1    | -0.02622 | 5.53E-01 | 6.14E-01 |
| CY TSA   | -0.15376 | 4.62E-04 | 9.75E-04 |
| CY TSB   | 0.222049 | 3.57E-07 | 1.15E-06 |
| CYYR1    | -0.32606 | 3.20E-14 | 2.17E-13 |
| CYorf15A | 0.016372 | 7.11E-01 | 7.58E-01 |
| CYorf15B | -0.0345  | 4.35E-01 | 5.01E-01 |

|         |          |           |           |
|---------|----------|-----------|-----------|
| D2HGDH  | -0.28346 | 5.68E-11  | 2.76E-10  |
| D4S234E | -0.2721  | 3.41E-10  | 1.54E-09  |
| DAAM1   | -0.00611 | 8.90E-01  | 9.11E-01  |
| DAAM2   | -0.46748 | 2.54E-29  | 6.24E-28  |
| DAB1    | 0.027681 | 5.31E-01  | 5.94E-01  |
| DAB2IP  | -0.29785 | 5.20E-12  | 2.83E-11  |
| DAB2    | -0.15445 | 4.35E-04  | 9.23E-04  |
| DACH1   | -0.2377  | 4.77E-08  | 1.68E-07  |
| DACH2   | -0.16295 | 2.04E-04  | 4.56E-04  |
| DACT1   | 0.060093 | 1.73E-01  | 2.25E-01  |
| DACT2   | -0.24432 | 1.95E-08  | 7.19E-08  |
| DACT3   | -0.26813 | 6.26E-10  | 2.74E-09  |
| DAD1L   | -0.08595 | 5.12E-02  | 7.54E-02  |
| DAD1    | 0.276797 | 1.64E-10  | 7.66E-10  |
| DAG1    | 0.010106 | 8.19E-01  | 8.51E-01  |
| DAGLA   | 0.031193 | 4.80E-01  | 5.45E-01  |
| DAGLB   | -0.19225 | 1.12E-05  | 2.97E-05  |
| DAK     | -0.06741 | 1.27E-01  | 1.70E-01  |
| DALRD3  | -0.27523 | 2.10E-10  | 9.70E-10  |
| DAND5   | 0.120924 | 6.00E-03  | 1.06E-02  |
| DAO     | -0.11315 | 1.02E-02  | 1.72E-02  |
| DAP3    | 0.276733 | 1.66E-10  | 7.73E-10  |
| DAPK1   | -0.44595 | 1.56E-26  | 3.11E-25  |
| DAPK2   | -0.6201  | 4.85E-56  | 3.81E-54  |
| DAPK3   | -0.0177  | 6.89E-01  | 7.38E-01  |
| DAPL1   | 0.022791 | 6.06E-01  | 6.63E-01  |
| DAPP1   | 0.045314 | 3.05E-01  | 3.68E-01  |
| DAP     | -0.07968 | 7.08E-02  | 1.01E-01  |
| DARC    | -0.39005 | 3.68E-20  | 4.37E-19  |
| DARS2   | 0.413262 | 1.16E-22  | 1.68E-21  |
| DARS    | 0.455643 | 9.18E-28  | 2.02E-26  |
| DAXX    | 0.083307 | 5.89E-02  | 8.56E-02  |
| DAZ1    | -0.04009 | 3.64E-01  | 4.30E-01  |
| DAZ2    | 0.004179 | 9.25E-01  | 9.40E-01  |
| DAZ3    | 0.010801 | 8.07E-01  | 8.40E-01  |
| DAZAP1  | 0.249889 | 9.00E-09  | 3.45E-08  |
| DAZAP2  | -0.03265 | 4.60E-01  | 5.26E-01  |
| DAZL    | 0.117139 | 7.79E-03  | 1.35E-02  |
| DBC1    | -0.12028 | 6.28E-03  | 1.11E-02  |
| DBF4B   | 0.533579 | 3.11E-39  | 1.37E-37  |
| DBF4    | 0.769457 | 5.98E-102 | 9.80E-100 |
| DBH     | -0.18465 | 2.48E-05  | 6.29E-05  |
| DBI     | 0.055363 | 2.10E-01  | 2.66E-01  |
| DBN1    | 0.277512 | 1.47E-10  | 6.87E-10  |

|          |          |          |          |
|----------|----------|----------|----------|
| DBNDD1   | 0.090798 | 3.94E-02 | 5.94E-02 |
| DBNDD2   | -0.15739 | 3.36E-04 | 7.26E-04 |
| DBNL     | -0.01064 | 8.10E-01 | 8.42E-01 |
| DBP      | -0.3486  | 3.68E-16 | 3.01E-15 |
| DBR1     | 0.275986 | 1.86E-10 | 8.66E-10 |
| DBT      | -0.17659 | 5.59E-05 | 1.35E-04 |
| DBX1     | 0.126184 | 4.13E-03 | 7.52E-03 |
| DBX2     | 0.018161 | 6.81E-01 | 7.31E-01 |
| DCAF10   | 0.065951 | 1.35E-01 | 1.80E-01 |
| DCAF11   | -0.24757 | 1.24E-08 | 4.69E-08 |
| DCAF12L1 | 0.093213 | 3.44E-02 | 5.25E-02 |
| DCAF12L2 | 0.090148 | 4.09E-02 | 6.14E-02 |
| DCAF12   | 0.062968 | 1.54E-01 | 2.02E-01 |
| DCAF13   | 0.361605 | 2.36E-17 | 2.18E-16 |
| DCAF15   | 0.049949 | 2.58E-01 | 3.19E-01 |
| DCAF16   | 0.113847 | 9.72E-03 | 1.65E-02 |
| DCAF17   | 0.264582 | 1.07E-09 | 4.56E-09 |
| DCAF4L1  | -0.05915 | 1.80E-01 | 2.33E-01 |
| DCAF4L2  | 0.168818 | 1.18E-04 | 2.73E-04 |
| DCAF4    | -0.17644 | 5.67E-05 | 1.37E-04 |
| DCAF5    | -0.23252 | 9.44E-08 | 3.23E-07 |
| DCAF6    | -0.34532 | 7.20E-16 | 5.73E-15 |
| DCAF7    | 0.166101 | 1.53E-04 | 3.46E-04 |
| DCAF8L1  | 0.188114 | 1.73E-05 | 4.49E-05 |
| DCAF8L2  | 0.1723   | 8.49E-05 | 2.00E-04 |
| DCAF8    | -0.42185 | 1.23E-23 | 1.94E-22 |
| DCAKD    | -0.11197 | 1.10E-02 | 1.85E-02 |
| DCBLD1   | 0.070632 | 1.09E-01 | 1.49E-01 |
| DCBLD2   | 0.226735 | 1.98E-07 | 6.56E-07 |
| DCC      | -0.09079 | 3.94E-02 | 5.94E-02 |
| DCDC1    | -0.01688 | 7.02E-01 | 7.51E-01 |
| DCDC2B   | -0.27843 | 1.27E-10 | 5.98E-10 |
| DCDC2    | -0.08478 | 5.45E-02 | 7.98E-02 |
| DCD      | -0.06951 | 1.15E-01 | 1.56E-01 |
| DCHS1    | -0.09636 | 2.88E-02 | 4.46E-02 |
| DCHS2    | -0.06474 | 1.42E-01 | 1.89E-01 |
| DCI      | -0.02759 | 5.32E-01 | 5.95E-01 |
| DCK      | 0.456379 | 7.37E-28 | 1.63E-26 |
| DCLK1    | 0.040072 | 3.64E-01 | 4.30E-01 |
| DCLK2    | -0.10445 | 1.77E-02 | 2.87E-02 |
| DCLK3    | 0.204124 | 3.01E-06 | 8.61E-06 |
| DCLRE1A  | 0.321515 | 7.54E-14 | 4.94E-13 |
| DCLRE1B  | 0.40592  | 7.54E-22 | 1.02E-20 |
| DCLRE1C  | 0.160363 | 2.58E-04 | 5.67E-04 |

|         |          |          |          |
|---------|----------|----------|----------|
| DCN     | -0.26229 | 1.50E-09 | 6.30E-09 |
| DCP1A   | -0.00791 | 8.58E-01 | 8.84E-01 |
| DCP1B   | -0.3098  | 6.43E-13 | 3.86E-12 |
| DCP2    | -0.06684 | 1.30E-01 | 1.74E-01 |
| DCPS    | 0.198599 | 5.59E-06 | 1.55E-05 |
| DCST1   | -0.01968 | 6.56E-01 | 7.09E-01 |
| DCST2   | -0.14653 | 8.52E-04 | 1.73E-03 |
| DCTD    | -0.183   | 2.94E-05 | 7.36E-05 |
| DCTN1   | -0.21553 | 7.91E-07 | 2.43E-06 |
| DCTN2   | 0.223462 | 2.99E-07 | 9.70E-07 |
| DCTN3   | 0.111795 | 1.11E-02 | 1.87E-02 |
| DCTN4   | -0.21443 | 9.03E-07 | 2.75E-06 |
| DCTN5   | 0.135745 | 2.02E-03 | 3.87E-03 |
| DCTN6   | -0.00174 | 9.69E-01 | 9.76E-01 |
| DCTPP1  | 0.301612 | 2.72E-12 | 1.53E-11 |
| DCT     | -0.21865 | 5.42E-07 | 1.70E-06 |
| DCUN1D1 | 0.40417  | 1.17E-21 | 1.56E-20 |
| DCUN1D2 | -0.15181 | 5.47E-04 | 1.14E-03 |
| DCUN1D3 | -0.08993 | 4.13E-02 | 6.20E-02 |
| DCUN1D4 | 0.095049 | 3.10E-02 | 4.78E-02 |
| DCUN1D5 | 0.476281 | 1.61E-30 | 4.29E-29 |
| DCXR    | -0.25501 | 4.35E-09 | 1.73E-08 |
| DCX     | 0.002357 | 9.57E-01 | 9.66E-01 |
| DDA1    | 0.095809 | 2.97E-02 | 4.59E-02 |
| DDAH1   | -0.37069 | 3.21E-18 | 3.19E-17 |
| DDAH2   | 0.026525 | 5.48E-01 | 6.10E-01 |
| DDB1    | 0.110291 | 1.23E-02 | 2.05E-02 |
| DDB2    | -0.06562 | 1.37E-01 | 1.82E-01 |
| DDC     | 0.011712 | 7.91E-01 | 8.27E-01 |
| DDHD1   | -0.00309 | 9.44E-01 | 9.56E-01 |
| DDHD2   | 0.135705 | 2.03E-03 | 3.88E-03 |
| DDI1    | -0.1329  | 2.51E-03 | 4.73E-03 |
| DDI2    | 0.049128 | 2.66E-01 | 3.27E-01 |
| DDIT3   | 0.30235  | 2.39E-12 | 1.35E-11 |
| DDIT4L  | -0.07196 | 1.03E-01 | 1.41E-01 |
| DDIT4   | 0.17378  | 7.36E-05 | 1.75E-04 |
| DDN     | 0.368131 | 5.66E-18 | 5.48E-17 |
| DDOST   | 0.229335 | 1.42E-07 | 4.79E-07 |
| DDO     | -0.11974 | 6.52E-03 | 1.15E-02 |
| DDR1    | -0.23104 | 1.14E-07 | 3.88E-07 |
| DDR2    | -0.1252  | 4.43E-03 | 8.03E-03 |
| DDRKG1  | -0.29779 | 5.25E-12 | 2.86E-11 |
| DDTL    | 0.002071 | 9.63E-01 | 9.71E-01 |
| DDT     | 0.034924 | 4.29E-01 | 4.95E-01 |

|         |          |          |          |
|---------|----------|----------|----------|
| DDX10   | 0.348031 | 4.13E-16 | 3.36E-15 |
| DDX11L2 | -0.1159  | 8.47E-03 | 1.45E-02 |
| DDX11   | 0.383943 | 1.56E-19 | 1.75E-18 |
| DDX12   | 0.379047 | 4.84E-19 | 5.16E-18 |
| DDX17   | -0.39082 | 3.07E-20 | 3.66E-19 |
| DDX18   | 0.407611 | 4.92E-22 | 6.79E-21 |
| DDX19A  | -0.03401 | 4.41E-01 | 5.08E-01 |
| DDX19B  | -0.16219 | 2.19E-04 | 4.86E-04 |
| DDX1    | 0.365833 | 9.39E-18 | 8.95E-17 |
| DDX20   | 0.143666 | 1.08E-03 | 2.15E-03 |
| DDX21   | 0.335552 | 5.10E-15 | 3.73E-14 |
| DDX23   | 0.393446 | 1.63E-20 | 1.99E-19 |
| DDX24   | -0.20468 | 2.82E-06 | 8.10E-06 |
| DDX25   | 0.160806 | 2.48E-04 | 5.46E-04 |
| DDX26B  | -0.09507 | 3.10E-02 | 4.77E-02 |
| DDX27   | 0.2309   | 1.16E-07 | 3.95E-07 |
| DDX28   | -0.02817 | 5.24E-01 | 5.87E-01 |
| DDX31   | -0.10407 | 1.82E-02 | 2.93E-02 |
| DDX39   | 0.54836  | 9.16E-42 | 4.58E-40 |
| DDX3X   | 0.053561 | 2.25E-01 | 2.83E-01 |
| DDX3Y   | 0.02573  | 5.60E-01 | 6.21E-01 |
| DDX41   | 0.079956 | 6.98E-02 | 1.00E-01 |
| DDX42   | -0.15474 | 4.25E-04 | 9.01E-04 |
| DDX43   | -0.02083 | 6.37E-01 | 6.92E-01 |
| DDX46   | 0.053083 | 2.29E-01 | 2.87E-01 |
| DDX47   | 0.46091  | 1.89E-28 | 4.35E-27 |
| DDX49   | 0.169813 | 1.08E-04 | 2.50E-04 |
| DDX4    | -0.06165 | 1.62E-01 | 2.12E-01 |
| DDX50   | 0.191268 | 1.24E-05 | 3.28E-05 |
| DDX51   | 0.00382  | 9.31E-01 | 9.45E-01 |
| DDX52   | 0.512059 | 9.13E-36 | 3.28E-34 |
| DDX53   | 0.206747 | 2.23E-06 | 6.47E-06 |
| DDX54   | 0.177031 | 5.35E-05 | 1.30E-04 |
| DDX55   | 0.383036 | 1.92E-19 | 2.14E-18 |
| DDX56   | 0.299426 | 3.97E-12 | 2.19E-11 |
| DDX58   | 0.173732 | 7.39E-05 | 1.76E-04 |
| DDX59   | 0.023486 | 5.95E-01 | 6.53E-01 |
| DDX5    | -0.20861 | 1.79E-06 | 5.28E-06 |
| DDX60L  | 0.122195 | 5.49E-03 | 9.79E-03 |
| DDX60   | 0.138096 | 1.68E-03 | 3.26E-03 |
| DDX6    | -0.15533 | 4.03E-04 | 8.59E-04 |
| DEAF1   | -0.29984 | 3.70E-12 | 2.05E-11 |
|         | 1-Dec    | 0.01358  | 7.59E-01 |
| DECR1   | -0.03409 | 4.40E-01 | 5.07E-01 |

|            |          |           |           |
|------------|----------|-----------|-----------|
| DECR2      | -0.15644 | 3.66E-04  | 7.85E-04  |
| DEDD2      | 0.023938 | 5.88E-01  | 6.46E-01  |
| DEDD       | 0.085194 | 5.33E-02  | 7.82E-02  |
| DEF6       | -0.16868 | 1.20E-04  | 2.76E-04  |
| DEF8       | -0.11034 | 1.22E-02  | 2.04E-02  |
| DEFA1B     | -0.0246  | 5.78E-01  | 6.37E-01  |
| DEFA4      | -0.0002  | 9.96E-01  | 9.97E-01  |
| DEFA5      | 0.108426 | 1.38E-02  | 2.29E-02  |
| DEFA6      | 0.086733 | 4.92E-02  | 7.26E-02  |
| DEFB103B   | 0.196416 | 7.11E-06  | 1.94E-05  |
| DEFB109P1B | 0.056856 | 1.98E-01  | 2.52E-01  |
| DEFB115    | -0.01113 | 8.01E-01  | 8.36E-01  |
| DEFB118    | 0.065477 | 1.38E-01  | 1.83E-01  |
| DEFB119    | -0.00787 | 8.59E-01  | 8.84E-01  |
| DEFB124    | -0.17686 | 5.44E-05  | 1.32E-04  |
| DEFB125    | 0.041127 | 3.52E-01  | 4.18E-01  |
| DEFB126    | 0.056194 | 2.03E-01  | 2.58E-01  |
| DEFB131    | -0.09597 | 2.94E-02  | 4.55E-02  |
| DEFB132    | 0.061591 | 1.63E-01  | 2.13E-01  |
| DEFB1      | 0.135728 | 2.02E-03  | 3.87E-03  |
| DEFB4A     | 0.155857 | 3.85E-04  | 8.23E-04  |
| DEGS1      | 0.10814  | 1.41E-02  | 2.33E-02  |
| DEGS2      | -0.22698 | 1.92E-07  | 6.37E-07  |
| DEK        | 0.463068 | 9.83E-29  | 2.31E-27  |
| DEM1       | 0.049879 | 2.59E-01  | 3.20E-01  |
| DENND1A    | 0.250346 | 8.44E-09  | 3.25E-08  |
| DENND1B    | -0.00631 | 8.86E-01  | 9.08E-01  |
| DENND1C    | -0.28773 | 2.83E-11  | 1.42E-10  |
| DENND2A    | -0.25186 | 6.81E-09  | 2.65E-08  |
| DENND2C    | 0.035518 | 4.21E-01  | 4.87E-01  |
| DENND2D    | -0.14404 | 1.05E-03  | 2.09E-03  |
| DENND3     | -0.39999 | 3.30E-21  | 4.27E-20  |
| DENND4A    | -0.08468 | 5.48E-02  | 8.01E-02  |
| DENND4B    | -0.02703 | 5.41E-01  | 6.03E-01  |
| DENND4C    | -0.07578 | 8.58E-02  | 1.20E-01  |
| DENND5A    | -0.08772 | 4.66E-02  | 6.92E-02  |
| DENND5B    | 0.212418 | 1.15E-06  | 3.45E-06  |
| DENR       | 0.629572 | 3.28E-58  | 2.73E-56  |
| DEPDC1B    | 0.856571 | 1.64E-149 | 8.42E-147 |
| DEPDC1     | 0.882634 | 2.61E-170 | 3.72E-167 |
| DEPDC4     | 0.235969 | 6.00E-08  | 2.10E-07  |
| DEPDC5     | -0.01816 | 6.81E-01  | 7.31E-01  |
| DEPDC6     | -0.28856 | 2.47E-11  | 1.25E-10  |
| DEPDC7     | 0.126287 | 4.10E-03  | 7.46E-03  |

|         |          |          |          |
|---------|----------|----------|----------|
| DERA    | 0.35587  | 8.04E-17 | 7.03E-16 |
| DERL1   | 0.271086 | 3.99E-10 | 1.79E-09 |
| DERL2   | 0.051267 | 2.45E-01 | 3.06E-01 |
| DERL3   | -0.08865 | 4.43E-02 | 6.61E-02 |
| DES     | -0.37341 | 1.75E-18 | 1.78E-17 |
| DET1    | -0.3295  | 1.66E-14 | 1.15E-13 |
| DEXI    | -0.52304 | 1.67E-37 | 6.54E-36 |
| DFFA    | 0.24921  | 9.90E-09 | 3.78E-08 |
| DFFB    | -0.15412 | 4.48E-04 | 9.47E-04 |
| DFNA5   | 0.113529 | 9.92E-03 | 1.69E-02 |
| DFNB31  | -0.09972 | 2.36E-02 | 3.73E-02 |
| DFNB59  | -0.17507 | 6.49E-05 | 1.55E-04 |
| DGAT1   | -0.29137 | 1.55E-11 | 8.01E-11 |
| DGAT2L6 | 0.024147 | 5.85E-01 | 6.44E-01 |
| DGAT2   | -0.04823 | 2.75E-01 | 3.37E-01 |
| DGCR10  | -0.10647 | 1.56E-02 | 2.56E-02 |
| DGCR11  | -0.10409 | 1.81E-02 | 2.93E-02 |
| DGCR14  | 0.029522 | 5.04E-01 | 5.68E-01 |
| DGCR2   | -0.29014 | 1.90E-11 | 9.73E-11 |
| DGCR5   | 0.02335  | 5.97E-01 | 6.55E-01 |
| DGCR6L  | -0.09201 | 3.68E-02 | 5.58E-02 |
| DGCR6   | -0.20256 | 3.59E-06 | 1.02E-05 |
| DGCR8   | -0.08539 | 5.28E-02 | 7.75E-02 |
| DGCR9   | -0.04586 | 2.99E-01 | 3.62E-01 |
| DGKA    | -0.04184 | 3.43E-01 | 4.09E-01 |
| DGKB    | 0.134811 | 2.17E-03 | 4.13E-03 |
| DGKD    | -0.27629 | 1.78E-10 | 8.27E-10 |
| DGKE    | 0.099309 | 2.42E-02 | 3.81E-02 |
| DGKG    | 0.175741 | 6.08E-05 | 1.46E-04 |
| DGKH    | 0.160962 | 2.45E-04 | 5.39E-04 |
| DGKI    | 0.085471 | 5.26E-02 | 7.72E-02 |
| DGKK    | 0.062523 | 1.57E-01 | 2.05E-01 |
| DGKQ    | -0.19306 | 1.02E-05 | 2.73E-05 |
| DGKZ    | 0.148851 | 7.02E-04 | 1.45E-03 |
| DGUOK   | 0.322155 | 6.69E-14 | 4.41E-13 |
| DHCR24  | -0.28966 | 2.06E-11 | 1.05E-10 |
| DHCR7   | 0.262242 | 1.51E-09 | 6.35E-09 |
| DHDDS   | -0.02002 | 6.50E-01 | 7.04E-01 |
| DHDH    | -0.14136 | 1.30E-03 | 2.56E-03 |
| DHDPSL  | -0.08634 | 5.02E-02 | 7.40E-02 |
| DHFRL1  | -0.25268 | 6.07E-09 | 2.38E-08 |
| DHFR    | 0.44142  | 5.70E-26 | 1.09E-24 |
| DHH     | -0.17521 | 6.40E-05 | 1.53E-04 |
| DHODH   | -0.08335 | 5.87E-02 | 8.54E-02 |



|         |          |           |           |
|---------|----------|-----------|-----------|
| DHPS    | -0.00877 | 8.43E-01  | 8.71E-01  |
| DHRS11  | 0.035548 | 4.21E-01  | 4.87E-01  |
| DHRS12  | -0.46419 | 6.97E-29  | 1.66E-27  |
| DHRS13  | -0.01737 | 6.94E-01  | 7.43E-01  |
| DHRS1   | -0.35704 | 6.27E-17  | 5.54E-16  |
| DHRS2   | 0.013745 | 7.56E-01  | 7.97E-01  |
| DHRS3   | -0.32166 | 7.35E-14  | 4.82E-13  |
| DHRS4L1 | -0.08397 | 5.69E-02  | 8.29E-02  |
| DHRS4L2 | -0.10049 | 2.26E-02  | 3.58E-02  |
| DHRS4   | -0.11743 | 7.64E-03  | 1.32E-02  |
| DHRS7B  | -0.29533 | 7.97E-12  | 4.24E-11  |
| DHRS7C  | 0.012377 | 7.79E-01  | 8.17E-01  |
| DHRS7   | -0.062   | 1.60E-01  | 2.09E-01  |
| DHRS9   | -0.01497 | 7.35E-01  | 7.79E-01  |
| DHRSX   | 0.061687 | 1.62E-01  | 2.12E-01  |
| DHTKD1  | -0.01475 | 7.38E-01  | 7.82E-01  |
| DHX15   | 0.318302 | 1.37E-13  | 8.76E-13  |
| DHX16   | 0.104158 | 1.81E-02  | 2.92E-02  |
| DHX29   | -0.20186 | 3.89E-06  | 1.10E-05  |
| DHX30   | 0.000477 | 9.91E-01  | 9.94E-01  |
| DHX32   | -0.10405 | 1.82E-02  | 2.94E-02  |
| DHX33   | 0.232075 | 1.00E-07  | 3.42E-07  |
| DHX34   | 0.094767 | 3.15E-02  | 4.85E-02  |
| DHX35   | 0.154262 | 4.43E-04  | 9.36E-04  |
| DHX36   | 0.483268 | 1.70E-31  | 4.80E-30  |
| DHX37   | 0.410019 | 2.67E-22  | 3.76E-21  |
| DHX38   | -0.06581 | 1.36E-01  | 1.81E-01  |
| DHX40P1 | 0.024951 | 5.72E-01  | 6.32E-01  |
| DHX40   | 0.032489 | 4.62E-01  | 5.28E-01  |
| DHX57   | 0.383051 | 1.92E-19  | 2.14E-18  |
| DHX58   | -0.17336 | 7.66E-05  | 1.82E-04  |
| DHX8    | 0.200579 | 4.49E-06  | 1.26E-05  |
| DHX9    | 0.231574 | 1.07E-07  | 3.64E-07  |
| DIABLO  | 0.41425  | 8.99E-23  | 1.31E-21  |
| DIAPH1  | 0.039715 | 3.68E-01  | 4.35E-01  |
| DIAPH2  | -0.13109 | 2.88E-03  | 5.37E-03  |
| DIAPH3  | 0.800396 | 4.35E-116 | 9.45E-114 |
| DICER1  | 0.050951 | 2.48E-01  | 3.09E-01  |
| DIDO1   | -0.24032 | 3.36E-08  | 1.21E-07  |
| DIMT1L  | 0.152097 | 5.33E-04  | 1.12E-03  |
| DIO1    | -0.22084 | 4.15E-07  | 1.32E-06  |
| DIO2    | 0.210596 | 1.42E-06  | 4.23E-06  |
| DIO3OS  | -0.30436 | 1.68E-12  | 9.67E-12  |
| DIO3    | -0.25624 | 3.64E-09  | 1.46E-08  |

|                |          |          |          |
|----------------|----------|----------|----------|
| DIP2A          | -0.13453 | 2.22E-03 | 4.21E-03 |
| DIP2B          | 0.304522 | 1.64E-12 | 9.42E-12 |
| DIP2C          | -0.17715 | 5.29E-05 | 1.28E-04 |
| DIRAS1         | -0.15385 | 4.59E-04 | 9.68E-04 |
| DIRAS2         | -0.04568 | 3.01E-01 | 3.64E-01 |
| DIRAS3         | -0.21948 | 4.90E-07 | 1.54E-06 |
| DIRC1          | 0.224132 | 2.75E-07 | 8.96E-07 |
| DIRC2          | -0.10375 | 1.85E-02 | 2.98E-02 |
| DIRC3          | 0.074145 | 9.28E-02 | 1.29E-01 |
| DIS3L2         | -0.17564 | 6.14E-05 | 1.48E-04 |
| DIS3L          | -0.24417 | 1.99E-08 | 7.33E-08 |
| DIS3           | 0.071676 | 1.04E-01 | 1.43E-01 |
| DISC1          | -0.1783  | 4.72E-05 | 1.15E-04 |
| DISC2          | 0.075369 | 8.75E-02 | 1.22E-01 |
| DISP1          | -0.4581  | 4.41E-28 | 9.89E-27 |
| DISP2          | 0.118442 | 7.13E-03 | 1.24E-02 |
| DIXDC1         | -0.3358  | 4.86E-15 | 3.56E-14 |
| DKC1           | 0.559629 | 8.84E-44 | 4.88E-42 |
| DKFZP434H168   | 0.046451 | 2.93E-01 | 3.56E-01 |
| DKFZP434K028   | -0.05302 | 2.30E-01 | 2.88E-01 |
| DKFZP434L187   | 0.03222  | 4.66E-01 | 5.31E-01 |
| DKFZP586I1420  | -0.24028 | 3.38E-08 | 1.21E-07 |
| DKFZP686I15217 | -0.21056 | 1.43E-06 | 4.24E-06 |
| DKFZp434J0226  | 0.021451 | 6.27E-01 | 6.83E-01 |
| DKFZp434L192   | 0.028376 | 5.21E-01 | 5.84E-01 |
| DKFZp566F0947  | -0.02333 | 5.97E-01 | 6.55E-01 |
| DKFZp686A1627  | 0.194401 | 8.86E-06 | 2.39E-05 |
| DKFZp686O24166 | 0.160316 | 2.59E-04 | 5.69E-04 |
| DKFZp761E198   | 0.004227 | 9.24E-01 | 9.39E-01 |
| DKFZp779M0652  | -0.16779 | 1.30E-04 | 2.99E-04 |
| DKK1           | 0.182242 | 3.17E-05 | 7.92E-05 |
| DKK2           | -0.16513 | 1.67E-04 | 3.77E-04 |
| DKK3           | -0.25499 | 4.36E-09 | 1.73E-08 |
| DKK4           | -0.02653 | 5.48E-01 | 6.10E-01 |
| DKKL1          | -0.07503 | 8.90E-02 | 1.24E-01 |
| DLAT           | 0.261554 | 1.68E-09 | 6.98E-09 |
| DLC1           | -0.59918 | 1.67E-51 | 1.17E-49 |
| DLD            | 0.3311   | 1.22E-14 | 8.57E-14 |
| DLEC1          | -0.48295 | 1.88E-31 | 5.30E-30 |
| DLEU1          | 0.131163 | 2.86E-03 | 5.35E-03 |
| DLEU2L         | 0.029799 | 5.00E-01 | 5.64E-01 |
| DLEU2          | 0.359195 | 3.96E-17 | 3.59E-16 |
| DLEU7          | -0.05438 | 2.18E-01 | 2.75E-01 |
| DLG1           | 0.083817 | 5.73E-02 | 8.35E-02 |

|         |          |           |           |
|---------|----------|-----------|-----------|
| DLG2    | -0.08164 | 6.41E-02  | 9.26E-02  |
| DLG3    | -0.14368 | 1.08E-03  | 2.15E-03  |
| DLG4    | -0.15819 | 3.13E-04  | 6.80E-04  |
| DLG5    | 0.099127 | 2.45E-02  | 3.85E-02  |
| DLGAP1  | -0.09553 | 3.02E-02  | 4.66E-02  |
| DLGAP2  | -0.16922 | 1.14E-04  | 2.64E-04  |
| DLGAP3  | 0.240398 | 3.32E-08  | 1.19E-07  |
| DLGAP4  | 0.182123 | 3.21E-05  | 8.01E-05  |
| DLGAP5  | 0.88266  | 2.47E-170 | 3.72E-167 |
| DLK1    | -0.04814 | 2.75E-01  | 3.37E-01  |
| DLK2    | 0.138911 | 1.58E-03  | 3.07E-03  |
| DLL1    | -0.04516 | 3.06E-01  | 3.70E-01  |
| DLL3    | 0.266807 | 7.65E-10  | 3.32E-09  |
| DLL4    | -0.11464 | 9.22E-03  | 1.57E-02  |
| DLST    | -0.02302 | 6.02E-01  | 6.60E-01  |
| DLX1    | 0.260038 | 2.10E-09  | 8.63E-09  |
| DLX2    | 0.327291 | 2.53E-14  | 1.73E-13  |
| DLX3    | -0.37928 | 4.59E-19  | 4.90E-18  |
| DLX4    | -0.21476 | 8.68E-07  | 2.65E-06  |
| DLX5    | 0.144338 | 1.02E-03  | 2.05E-03  |
| DLX6AS  | 0.187287 | 1.89E-05  | 4.87E-05  |
| DLX6    | 0.237814 | 4.70E-08  | 1.66E-07  |
| DMAP1   | -0.13394 | 2.32E-03  | 4.39E-03  |
| DMBT1   | -0.28201 | 7.18E-11  | 3.46E-10  |
| DMBX1   | 0.2549   | 4.42E-09  | 1.75E-08  |
| DMC1    | 0.473763 | 3.57E-30  | 9.30E-29  |
| DMD     | -0.29109 | 1.63E-11  | 8.37E-11  |
| DMGDH   | 0.015303 | 7.29E-01  | 7.74E-01  |
| DMKN    | -0.11583 | 8.51E-03  | 1.46E-02  |
| DMP1    | 0.098131 | 2.60E-02  | 4.06E-02  |
| DMPK    | 0.032739 | 4.58E-01  | 5.25E-01  |
| DMRT1   | 0.193978 | 9.27E-06  | 2.49E-05  |
| DMRT2   | -0.1318  | 2.73E-03  | 5.11E-03  |
| DMRT3   | 0.115554 | 8.67E-03  | 1.49E-02  |
| DMRTA1  | -0.22157 | 3.79E-07  | 1.21E-06  |
| DMRTA2  | -0.00443 | 9.20E-01  | 9.36E-01  |
| DMRTB1  | 0.092298 | 3.63E-02  | 5.50E-02  |
| DMRTC1B | -0.50659 | 6.35E-35  | 2.15E-33  |
| DMRTC1  | -0.29102 | 1.64E-11  | 8.46E-11  |
| DMRTC2  | 0.150973 | 5.87E-04  | 1.22E-03  |
| DMTF1   | -0.1084  | 1.38E-02  | 2.29E-02  |
| DMWD    | 0.093824 | 3.33E-02  | 5.09E-02  |
| DMXL1   | -0.26731 | 7.10E-10  | 3.09E-09  |
| DMXL2   | 0.090848 | 3.93E-02  | 5.93E-02  |

|         |          |          |          |
|---------|----------|----------|----------|
| DNA2    | 0.604056 | 1.57E-52 | 1.13E-50 |
| DNAH10  | -0.29578 | 7.39E-12 | 3.95E-11 |
| DNAH11  | -0.10742 | 1.47E-02 | 2.43E-02 |
| DNAH12  | -0.26986 | 4.81E-10 | 2.14E-09 |
| DNAH14  | 0.320869 | 8.51E-14 | 5.55E-13 |
| DNAH17  | -0.06534 | 1.39E-01 | 1.84E-01 |
| DNAH1   | -0.35198 | 1.82E-16 | 1.53E-15 |
| DNAH2   | -0.23673 | 5.43E-08 | 1.90E-07 |
| DNAH3   | -0.16377 | 1.89E-04 | 4.24E-04 |
| DNAH5   | -0.38314 | 1.88E-19 | 2.09E-18 |
| DNAH6   | -0.3335  | 7.64E-15 | 5.48E-14 |
| DNAH7   | -0.35763 | 5.54E-17 | 4.94E-16 |
| DNAH8   | -0.19381 | 9.44E-06 | 2.54E-05 |
| DNAH9   | -0.3201  | 9.82E-14 | 6.36E-13 |
| DNAI1   | -0.22889 | 1.51E-07 | 5.06E-07 |
| DNAI2   | -0.31607 | 2.06E-13 | 1.30E-12 |
| DNAJA1  | 0.38593  | 9.77E-20 | 1.11E-18 |
| DNAJA2  | 0.032916 | 4.56E-01 | 5.22E-01 |
| DNAJA3  | 0.110377 | 1.22E-02 | 2.04E-02 |
| DNAJA4  | -0.14812 | 7.47E-04 | 1.53E-03 |
| DNAJB11 | 0.454575 | 1.26E-27 | 2.73E-26 |
| DNAJB12 | -0.23762 | 4.82E-08 | 1.70E-07 |
| DNAJB13 | -0.34464 | 8.27E-16 | 6.55E-15 |
| DNAJB14 | 0.079602 | 7.11E-02 | 1.02E-01 |
| DNAJB1  | 0.165189 | 1.66E-04 | 3.75E-04 |
| DNAJB2  | -0.286   | 3.76E-11 | 1.86E-10 |
| DNAJB3  | 0.149734 | 6.52E-04 | 1.35E-03 |
| DNAJB4  | 0.261575 | 1.67E-09 | 6.96E-09 |
| DNAJB5  | 0.108852 | 1.35E-02 | 2.23E-02 |
| DNAJB6  | 0.234614 | 7.18E-08 | 2.49E-07 |
| DNAJB7  | -0.06363 | 1.49E-01 | 1.97E-01 |
| DNAJB8  | 0.020134 | 6.49E-01 | 7.02E-01 |
| DNAJB9  | -0.04162 | 3.46E-01 | 4.12E-01 |
| DNAJC10 | 0.333648 | 7.41E-15 | 5.33E-14 |
| DNAJC11 | 0.209383 | 1.64E-06 | 4.84E-06 |
| DNAJC12 | 0.050347 | 2.54E-01 | 3.15E-01 |
| DNAJC13 | 0.21551  | 7.94E-07 | 2.44E-06 |
| DNAJC14 | 0.332819 | 8.71E-15 | 6.22E-14 |
| DNAJC15 | 0.015902 | 7.19E-01 | 7.65E-01 |
| DNAJC16 | -0.10161 | 2.11E-02 | 3.36E-02 |
| DNAJC17 | -0.16055 | 2.54E-04 | 5.58E-04 |
| DNAJC18 | -0.06761 | 1.25E-01 | 1.69E-01 |
| DNAJC19 | 0.102547 | 1.99E-02 | 3.19E-02 |
| DNAJC1  | 0.131822 | 2.72E-03 | 5.10E-03 |

|               |          |          |          |
|---------------|----------|----------|----------|
| DNAJC21       | 0.00173  | 9.69E-01 | 9.76E-01 |
| DNAJC22       | 0.333923 | 7.02E-15 | 5.07E-14 |
| DNAJC24       | 0.079259 | 7.23E-02 | 1.03E-01 |
| DNAJC25-GNG10 | 0.032163 | 4.66E-01 | 5.32E-01 |
| DNAJC25       | 0.06813  | 1.23E-01 | 1.65E-01 |
| DNAJC27       | -0.30635 | 1.19E-12 | 6.91E-12 |
| DNAJC28       | -0.32166 | 7.33E-14 | 4.82E-13 |
| DNAJC2        | 0.416242 | 5.36E-23 | 8.01E-22 |
| DNAJC30       | -0.13497 | 2.14E-03 | 4.08E-03 |
| DNAJC3        | -0.18472 | 2.46E-05 | 6.25E-05 |
| DNAJC4        | -0.35911 | 4.03E-17 | 3.66E-16 |
| DNAJC5B       | -0.09451 | 3.20E-02 | 4.91E-02 |
| DNAJC5G       | -0.10085 | 2.21E-02 | 3.50E-02 |
| DNAJC5        | -0.12063 | 6.13E-03 | 1.08E-02 |
| DNAJC6        | 0.237947 | 4.62E-08 | 1.63E-07 |
| DNAJC7        | 0.234431 | 7.35E-08 | 2.54E-07 |
| DNAJC8        | 0.200232 | 4.66E-06 | 1.31E-05 |
| DNAJC9        | 0.684857 | 1.55E-72 | 1.70E-70 |
| DNAL1         | -0.19652 | 7.03E-06 | 1.92E-05 |
| DNAL4         | -0.25404 | 5.00E-09 | 1.97E-08 |
| DNALI1        | -0.37324 | 1.81E-18 | 1.84E-17 |
| DNASE1L1      | -0.0303  | 4.93E-01 | 5.57E-01 |
| DNASE1L2      | 0.116314 | 8.24E-03 | 1.42E-02 |
| DNASE1L3      | -0.24903 | 1.02E-08 | 3.87E-08 |
| DNASE1        | 0.077612 | 7.85E-02 | 1.11E-01 |
| DNASE2B       | -0.28466 | 4.67E-11 | 2.29E-10 |
| DNASE2        | -0.13072 | 2.96E-03 | 5.51E-03 |
| DND1          | -0.149   | 6.93E-04 | 1.43E-03 |
| DNER          | 0.107182 | 1.50E-02 | 2.46E-02 |
| DNHD1         | -0.22442 | 2.66E-07 | 8.66E-07 |
| DNLZ          | 0.013849 | 7.54E-01 | 7.95E-01 |
| DNM1L         | 0.454134 | 1.44E-27 | 3.10E-26 |
| DNM1P35       | -0.22878 | 1.53E-07 | 5.12E-07 |
| DNM1          | 0.21707  | 6.57E-07 | 2.04E-06 |
| DNM2          | -0.26528 | 9.64E-10 | 4.13E-09 |
| DNM3          | -0.16916 | 1.15E-04 | 2.65E-04 |
| DNMBP         | -0.12236 | 5.43E-03 | 9.68E-03 |
| DNMT1         | 0.451351 | 3.26E-27 | 6.85E-26 |
| DNMT3A        | 0.346884 | 5.23E-16 | 4.22E-15 |
| DNMT3B        | 0.469636 | 1.30E-29 | 3.27E-28 |
| DNMT3L        | 0.015767 | 7.21E-01 | 7.67E-01 |
| DNPEP         | 0.182999 | 2.94E-05 | 7.37E-05 |
| DNTTIP1       | 0.232855 | 9.04E-08 | 3.10E-07 |
| DNTTIP2       | 0.391504 | 2.60E-20 | 3.13E-19 |

|        |          |          |          |
|--------|----------|----------|----------|
| DNTT   | 0.029356 | 5.06E-01 | 5.70E-01 |
| DOC2A  | 0.041006 | 3.53E-01 | 4.19E-01 |
| DOC2B  | -0.10435 | 1.78E-02 | 2.89E-02 |
| DOCK10 | -0.13451 | 2.22E-03 | 4.21E-03 |
| DOCK11 | -0.04098 | 3.53E-01 | 4.19E-01 |
| DOCK1  | -0.29877 | 4.44E-12 | 2.44E-11 |
| DOCK2  | -0.14491 | 9.74E-04 | 1.96E-03 |
| DOCK3  | 0.02119  | 6.31E-01 | 6.87E-01 |
| DOCK4  | -0.20522 | 2.65E-06 | 7.64E-06 |
| DOCK5  | -0.04961 | 2.61E-01 | 3.22E-01 |
| DOCK6  | -0.16815 | 1.26E-04 | 2.90E-04 |
| DOCK7  | 0.186716 | 2.00E-05 | 5.15E-05 |
| DOCK8  | -0.21057 | 1.43E-06 | 4.24E-06 |
| DOCK9  | -0.37861 | 5.35E-19 | 5.68E-18 |
| DOHH   | 0.020861 | 6.37E-01 | 6.91E-01 |
| DOK1   | -0.18566 | 2.23E-05 | 5.71E-05 |
| DOK2   | -0.14016 | 1.43E-03 | 2.80E-03 |
| DOK3   | -0.01507 | 7.33E-01 | 7.77E-01 |
| DOK4   | -0.49177 | 1.03E-32 | 3.11E-31 |
| DOK5   | 0.070051 | 1.12E-01 | 1.53E-01 |
| DOK6   | -0.23237 | 9.63E-08 | 3.29E-07 |
| DOK7   | -0.19226 | 1.12E-05 | 2.97E-05 |
| DOLK   | 0.006166 | 8.89E-01 | 9.10E-01 |
| DOLPP1 | 0.144378 | 1.02E-03 | 2.04E-03 |
| DOM3Z  | -0.13485 | 2.16E-03 | 4.12E-03 |
| DONSON | 0.658606 | 2.35E-65 | 2.30E-63 |
| DOPEY1 | -0.1627  | 2.09E-04 | 4.65E-04 |
| DOPEY2 | -0.01696 | 7.01E-01 | 7.49E-01 |
| DOT1L  | 0.10698  | 1.51E-02 | 2.49E-02 |
| DPAGT1 | -0.03923 | 3.74E-01 | 4.41E-01 |
| DPCD   | 2.44E-05 | 1.00E+00 | 1.00E+00 |
| DPCR1  | -0.38667 | 8.22E-20 | 9.41E-19 |
| DPEP1  | -0.13225 | 2.64E-03 | 4.95E-03 |
| DPEP2  | -0.32791 | 2.25E-14 | 1.55E-13 |
| DPEP3  | 0.016393 | 7.11E-01 | 7.58E-01 |
| DPF1   | 0.355323 | 9.03E-17 | 7.86E-16 |
| DPF2   | 0.05997  | 1.74E-01 | 2.26E-01 |
| DPF3   | -0.05611 | 2.04E-01 | 2.59E-01 |
| DPH1   | -0.37066 | 3.23E-18 | 3.21E-17 |
| DPH2   | 0.329643 | 1.61E-14 | 1.12E-13 |
| DPH3B  | 0.071027 | 1.07E-01 | 1.47E-01 |
| DPH3   | 0.154283 | 4.42E-04 | 9.35E-04 |
| DPH5   | 0.126541 | 4.02E-03 | 7.34E-03 |
| DPM1   | 0.357426 | 5.78E-17 | 5.15E-16 |

|           |          |          |          |
|-----------|----------|----------|----------|
| DPM2      | -0.18476 | 2.45E-05 | 6.23E-05 |
| DPM3      | -0.14537 | 9.38E-04 | 1.89E-03 |
| DPP10     | -0.15685 | 3.53E-04 | 7.59E-04 |
| DPP3      | 0.237763 | 4.73E-08 | 1.67E-07 |
| DPP4      | -0.22143 | 3.85E-07 | 1.23E-06 |
| DPP6      | -0.3002  | 3.47E-12 | 1.93E-11 |
| DPP7      | -0.30697 | 1.06E-12 | 6.23E-12 |
| DPP8      | 0.121113 | 5.92E-03 | 1.05E-02 |
| DPP9      | 0.0524   | 2.35E-01 | 2.94E-01 |
| DPPA2     | 0.164962 | 1.70E-04 | 3.82E-04 |
| DPPA3     | 0.008181 | 8.53E-01 | 8.80E-01 |
| DPPA4     | 0.040206 | 3.63E-01 | 4.29E-01 |
| DPPA5     | 0.114759 | 9.15E-03 | 1.56E-02 |
| DPRXP4    | -0.10433 | 1.79E-02 | 2.89E-02 |
| DPRX      | -0.03843 | 3.84E-01 | 4.50E-01 |
| DPT       | -0.16737 | 1.36E-04 | 3.10E-04 |
| DPY19L1   | 0.195197 | 8.12E-06 | 2.20E-05 |
| DPY19L2P1 | 0.170554 | 1.00E-04 | 2.34E-04 |
| DPY19L2P2 | 0.01688  | 7.02E-01 | 7.51E-01 |
| DPY19L2P4 | -0.04363 | 3.23E-01 | 3.88E-01 |
| DPY19L2   | 0.098083 | 2.60E-02 | 4.07E-02 |
| DPY19L3   | -0.11502 | 8.99E-03 | 1.54E-02 |
| DPY19L4   | 0.145436 | 9.33E-04 | 1.88E-03 |
| DPY30     | 0.303409 | 1.99E-12 | 1.14E-11 |
| DPYD      | -0.12356 | 4.99E-03 | 8.96E-03 |
| DPYSL2    | -0.52751 | 3.13E-38 | 1.29E-36 |
| DPYSL3    | 0.042263 | 3.38E-01 | 4.04E-01 |
| DPYSL4    | 0.102689 | 1.98E-02 | 3.17E-02 |
| DPYSL5    | 0.257782 | 2.91E-09 | 1.18E-08 |
| DPYS      | -0.25906 | 2.42E-09 | 9.89E-09 |
| DQX1      | 0.055548 | 2.08E-01 | 2.64E-01 |
| DR1       | 0.315832 | 2.16E-13 | 1.35E-12 |
| DRAM1     | -0.44233 | 4.40E-26 | 8.52E-25 |
| DRAM2     | 0.018743 | 6.71E-01 | 7.22E-01 |
| DRAP1     | 0.334468 | 6.31E-15 | 4.57E-14 |
| DRD1      | -0.30699 | 1.06E-12 | 6.21E-12 |
| DRD2      | 0.002883 | 9.48E-01 | 9.59E-01 |
| DRD3      | 0.064429 | 1.44E-01 | 1.91E-01 |
| DRD4      | -0.02247 | 6.11E-01 | 6.68E-01 |
| DRD5      | -0.18028 | 3.87E-05 | 9.56E-05 |
| DRG1      | 0.381711 | 2.62E-19 | 2.88E-18 |
| DRG2      | 0.033638 | 4.46E-01 | 5.13E-01 |
| DRGX      | -0.0882  | 4.54E-02 | 6.76E-02 |
| DRP2      | 0.434359 | 4.12E-25 | 7.32E-24 |

|         |          |           |           |
|---------|----------|-----------|-----------|
| DSC1    | 0.248    | 1.17E-08  | 4.42E-08  |
| DSC2    | 0.356457 | 7.10E-17  | 6.25E-16  |
| DSC3    | 0.125819 | 4.24E-03  | 7.71E-03  |
| DSCAML1 | -0.2101  | 1.51E-06  | 4.47E-06  |
| DSCAM   | 0.120709 | 6.09E-03  | 1.08E-02  |
| DSCC1   | 0.770208 | 2.88E-102 | 4.76E-100 |
| DSCR10  | 0.102134 | 2.04E-02  | 3.27E-02  |
| DSCR3   | -0.04994 | 2.58E-01  | 3.19E-01  |
| DSCR4   | 0.155242 | 4.06E-04  | 8.65E-04  |
| DSCR6   | 0.264657 | 1.06E-09  | 4.51E-09  |
| DSCR8   | 0.204228 | 2.97E-06  | 8.51E-06  |
| DSCR9   | 0.112856 | 1.04E-02  | 1.76E-02  |
| DSEL    | -0.2151  | 8.34E-07  | 2.55E-06  |
| DSE     | 0.240626 | 3.22E-08  | 1.16E-07  |
| DSG1    | 0.164526 | 1.77E-04  | 3.97E-04  |
| DSG2    | 0.359956 | 3.36E-17  | 3.07E-16  |
| DSG3    | 0.120442 | 6.21E-03  | 1.10E-02  |
| DSG4    | 0.234478 | 7.31E-08  | 2.53E-07  |
| DSN1    | 0.613166 | 1.69E-54  | 1.27E-52  |
| DSPP    | -0.00095 | 9.83E-01  | 9.87E-01  |
| DSP     | 0.351634 | 1.96E-16  | 1.65E-15  |
| DSTN    | -0.23532 | 6.54E-08  | 2.28E-07  |
| DSTYK   | -0.34381 | 9.80E-16  | 7.67E-15  |
| DST     | 0.047819 | 2.79E-01  | 3.41E-01  |
| DTD1    | 0.269915 | 4.77E-10  | 2.12E-09  |
| DTHD1   | -0.19839 | 5.72E-06  | 1.58E-05  |
| DTL     | 0.826147 | 6.60E-130 | 1.89E-127 |
| DTNA    | 0.012074 | 7.85E-01  | 8.21E-01  |
| DTNBP1  | -0.16536 | 1.64E-04  | 3.70E-04  |
| DTNB    | -0.18632 | 2.09E-05  | 5.35E-05  |
| DTWD1   | -0.12054 | 6.17E-03  | 1.09E-02  |
| DTWD2   | -0.13169 | 2.75E-03  | 5.15E-03  |
| DTX1    | -0.07301 | 9.79E-02  | 1.35E-01  |
| DTX2    | 0.064755 | 1.42E-01  | 1.89E-01  |
| DTX3L   | 0.212724 | 1.11E-06  | 3.33E-06  |
| DTX3    | -0.14976 | 6.50E-04  | 1.35E-03  |
| DTX4    | -0.34637 | 5.82E-16  | 4.68E-15  |
| DTYMK   | 0.612805 | 2.03E-54  | 1.52E-52  |
| DULLARD | -0.01252 | 7.77E-01  | 8.15E-01  |
| DUOX1   | -0.46367 | 8.18E-29  | 1.93E-27  |
| DUOX2   | -0.2804  | 9.28E-11  | 4.42E-10  |
| DUOXA1  | -0.44491 | 2.11E-26  | 4.15E-25  |
| DUOXA2  | -0.3005  | 3.29E-12  | 1.83E-11  |
| DUPD1   | -0.07324 | 9.69E-02  | 1.34E-01  |



|          |          |          |          |
|----------|----------|----------|----------|
| DUS1L    | 0.078134 | 7.65E-02 | 1.09E-01 |
| DUS2L    | -0.02853 | 5.18E-01 | 5.82E-01 |
| DUS3L    | 0.14941  | 6.70E-04 | 1.38E-03 |
| DUS4L    | 0.465771 | 4.30E-29 | 1.04E-27 |
| DUSP10   | -0.00965 | 8.27E-01 | 8.58E-01 |
| DUSP11   | 0.3533   | 1.38E-16 | 1.18E-15 |
| DUSP12   | 0.182651 | 3.05E-05 | 7.62E-05 |
| DUSP13   | 0.335921 | 4.74E-15 | 3.49E-14 |
| DUSP14   | 0.417719 | 3.64E-23 | 5.54E-22 |
| DUSP15   | -0.08009 | 6.94E-02 | 9.94E-02 |
| DUSP16   | -0.21744 | 6.28E-07 | 1.95E-06 |
| DUSP18   | -0.21569 | 7.76E-07 | 2.39E-06 |
| DUSP19   | -0.11651 | 8.13E-03 | 1.40E-02 |
| DUSP1    | -0.2978  | 5.24E-12 | 2.85E-11 |
| DUSP21   | 0.012356 | 7.80E-01 | 8.17E-01 |
| DUSP22   | -0.42603 | 4.00E-24 | 6.63E-23 |
| DUSP23   | -0.01904 | 6.66E-01 | 7.18E-01 |
| DUSP26   | -0.30622 | 1.21E-12 | 7.06E-12 |
| DUSP27   | -0.28175 | 7.48E-11 | 3.59E-10 |
| DUSP28   | -0.16255 | 2.12E-04 | 4.71E-04 |
| DUSP2    | 0.036349 | 4.10E-01 | 4.77E-01 |
| DUSP3    | -0.07504 | 8.89E-02 | 1.24E-01 |
| DUSP4    | 0.168519 | 1.22E-04 | 2.80E-04 |
| DUSP5P   | 0.268766 | 5.69E-10 | 2.50E-09 |
| DUSP5    | 0.202323 | 3.69E-06 | 1.05E-05 |
| DUSP6    | -0.09312 | 3.46E-02 | 5.28E-02 |
| DUSP7    | -0.12103 | 5.96E-03 | 1.06E-02 |
| DUSP8    | -0.3125  | 3.96E-13 | 2.42E-12 |
| DUSP9    | 0.212878 | 1.09E-06 | 3.27E-06 |
| DUT      | 0.263833 | 1.20E-09 | 5.06E-09 |
| DUXA     | -0.02128 | 6.30E-01 | 6.85E-01 |
| DVL1     | -0.01399 | 7.51E-01 | 7.93E-01 |
| DVL2     | 0.128544 | 3.48E-03 | 6.40E-03 |
| DVL3     | 0.288134 | 2.65E-11 | 1.34E-10 |
| DVWA     | 0.033531 | 4.48E-01 | 5.14E-01 |
| DYDC1    | -0.19459 | 8.68E-06 | 2.34E-05 |
| DYDC2    | -0.10721 | 1.49E-02 | 2.46E-02 |
| DYM      | 0.105131 | 1.70E-02 | 2.76E-02 |
| DYNC1H1  | 0.036317 | 4.11E-01 | 4.77E-01 |
| DYNC1I1  | 0.116614 | 8.07E-03 | 1.39E-02 |
| DYNC1I2  | 0.233288 | 8.54E-08 | 2.94E-07 |
| DYNC1LI1 | 0.185541 | 2.26E-05 | 5.78E-05 |
| DYNC1LI2 | -0.28949 | 2.12E-11 | 1.08E-10 |
| DYNC2H1  | -0.34448 | 8.55E-16 | 6.76E-15 |

|          |          |          |          |
|----------|----------|----------|----------|
| DYNC2LI1 | -0.19039 | 1.36E-05 | 3.58E-05 |
| DYNLL1   | 0.381635 | 2.66E-19 | 2.92E-18 |
| DYNLL2   | -0.08452 | 5.53E-02 | 8.08E-02 |
| DYNLRB1  | 0.064639 | 1.43E-01 | 1.89E-01 |
| DYNLRB2  | -0.34754 | 4.57E-16 | 3.71E-15 |
| DYNLT1   | 0.049288 | 2.64E-01 | 3.26E-01 |
| DYNLT3   | 0.116882 | 7.93E-03 | 1.37E-02 |
| DYRK1A   | -0.25776 | 2.92E-09 | 1.19E-08 |
| DYRK1B   | -0.21632 | 7.20E-07 | 2.22E-06 |
| DYRK2    | 0.222725 | 3.28E-07 | 1.06E-06 |
| DYRK3    | -0.22406 | 2.78E-07 | 9.04E-07 |
| DYRK4    | -0.09251 | 3.58E-02 | 5.45E-02 |
| DYSFIP1  | 0.197335 | 6.43E-06 | 1.77E-05 |
| DYSF     | 0.069019 | 1.18E-01 | 1.59E-01 |
| DYTN     | 0.023924 | 5.88E-01 | 6.46E-01 |
| DYX1C1   | -0.21002 | 1.52E-06 | 4.51E-06 |
| DZIP1L   | -0.08048 | 6.80E-02 | 9.77E-02 |
| DZIP1    | 0.072748 | 9.91E-02 | 1.37E-01 |
| DZIP3    | -0.05281 | 2.32E-01 | 2.90E-01 |
| E2F1     | 0.651343 | 1.71E-63 | 1.62E-61 |
| E2F2     | 0.737519 | 1.65E-89 | 2.31E-87 |
| E2F3     | 0.472553 | 5.23E-30 | 1.34E-28 |
| E2F4     | 0.202976 | 3.43E-06 | 9.75E-06 |
| E2F5     | 0.092394 | 3.61E-02 | 5.47E-02 |
| E2F6     | 0.445302 | 1.88E-26 | 3.71E-25 |
| E2F7     | 0.684036 | 2.67E-72 | 2.90E-70 |
| E2F8     | 0.728386 | 2.80E-86 | 3.71E-84 |
| E4F1     | -0.11417 | 9.51E-03 | 1.62E-02 |
| EAF1     | 0.195211 | 8.11E-06 | 2.20E-05 |
| EAF2     | 0.082904 | 6.01E-02 | 8.72E-02 |
| EAPP     | -0.09035 | 4.04E-02 | 6.08E-02 |
| EARS2    | -0.19218 | 1.13E-05 | 2.99E-05 |
| EBAG9    | -0.12983 | 3.16E-03 | 5.87E-03 |
| EBF1     | -0.15741 | 3.36E-04 | 7.25E-04 |
| EBF2     | -0.12482 | 4.56E-03 | 8.24E-03 |
| EBF3     | -0.19897 | 5.37E-06 | 1.49E-05 |
| EBF4     | -0.39727 | 6.45E-21 | 8.14E-20 |
| EBI3     | 0.009103 | 8.37E-01 | 8.66E-01 |
| EBNA1BP2 | 0.380291 | 3.63E-19 | 3.92E-18 |
| EBPL     | -0.13316 | 2.46E-03 | 4.64E-03 |
| EBP      | 0.298125 | 4.96E-12 | 2.71E-11 |
| ECD      | 0.137088 | 1.82E-03 | 3.51E-03 |
| ECE1     | 0.105138 | 1.70E-02 | 2.76E-02 |
| ECE2     | 0.494403 | 4.23E-33 | 1.31E-31 |

|          |          |          |          |
|----------|----------|----------|----------|
| ECEL1    | 0.1075   | 1.47E-02 | 2.42E-02 |
| ECH1     | -0.04885 | 2.69E-01 | 3.30E-01 |
| ECHDC1   | -0.24872 | 1.06E-08 | 4.03E-08 |
| ECHDC2   | -0.50253 | 2.62E-34 | 8.69E-33 |
| ECHDC3   | -0.19405 | 9.19E-06 | 2.47E-05 |
| ECHS1    | -0.0147  | 7.39E-01 | 7.83E-01 |
| ECM1     | -0.0315  | 4.76E-01 | 5.41E-01 |
| ECM2     | -0.26055 | 1.94E-09 | 8.04E-09 |
| ECSCR    | -0.23384 | 7.94E-08 | 2.74E-07 |
| ECSIT    | 0.016547 | 7.08E-01 | 7.56E-01 |
| ECT2L    | -0.28097 | 8.47E-11 | 4.06E-10 |
| ECT2     | 0.732666 | 8.93E-88 | 1.22E-85 |
| EDA2R    | -0.42188 | 1.21E-23 | 1.93E-22 |
| EDARADD  | 0.182788 | 3.00E-05 | 7.52E-05 |
| EDAR     | -0.15148 | 5.62E-04 | 1.17E-03 |
| EDA      | -0.30821 | 8.54E-13 | 5.06E-12 |
| EDC3     | 0.196731 | 6.87E-06 | 1.88E-05 |
| EDC4     | -0.10599 | 1.61E-02 | 2.63E-02 |
| EDDM3A   | -0.14931 | 6.76E-04 | 1.39E-03 |
| EDDM3B   | -0.07606 | 8.46E-02 | 1.19E-01 |
| EDEM1    | -0.31684 | 1.79E-13 | 1.13E-12 |
| EDEM2    | -0.06529 | 1.39E-01 | 1.85E-01 |
| EDEM3    | -0.00288 | 9.48E-01 | 9.59E-01 |
| EDF1     | -0.07379 | 9.44E-02 | 1.31E-01 |
| EDIL3    | 0.02801  | 5.26E-01 | 5.89E-01 |
| EDN1     | -0.13756 | 1.75E-03 | 3.39E-03 |
| EDN2     | 0.04888  | 2.68E-01 | 3.30E-01 |
| EDN3     | -0.40568 | 8.00E-22 | 1.08E-20 |
| EDNRA    | -0.12749 | 3.76E-03 | 6.88E-03 |
| EDNRB    | -0.42088 | 1.58E-23 | 2.48E-22 |
| EEA1     | -0.07045 | 1.10E-01 | 1.50E-01 |
| EED      | 0.481391 | 3.12E-31 | 8.70E-30 |
| EEF1A1P9 | -0.18353 | 2.78E-05 | 7.00E-05 |
| EEF1A1   | -0.13755 | 1.76E-03 | 3.39E-03 |
| EEF1A2   | 0.015117 | 7.32E-01 | 7.77E-01 |
| EEF1B2   | 0.053392 | 2.26E-01 | 2.84E-01 |
| EEF1DP3  | -0.08384 | 5.73E-02 | 8.34E-02 |
| EEF1D    | -0.11758 | 7.56E-03 | 1.31E-02 |
| EEF1E1   | 0.390444 | 3.35E-20 | 3.99E-19 |
| EEF1G    | 0.037239 | 3.99E-01 | 4.66E-01 |
| EEF2K    | -0.36468 | 1.21E-17 | 1.14E-16 |
| EEF2     | -0.14851 | 7.23E-04 | 1.48E-03 |
| EEFSEC   | -0.04132 | 3.49E-01 | 4.15E-01 |
| EEPD1    | 0.140078 | 1.44E-03 | 2.82E-03 |

|         |          |          |          |
|---------|----------|----------|----------|
| EFCAB10 | -0.25679 | 3.36E-09 | 1.35E-08 |
| EFCAB1  | -0.26536 | 9.52E-10 | 4.08E-09 |
| EFCAB2  | -0.22891 | 1.50E-07 | 5.04E-07 |
| EFCAB3  | 0.146453 | 8.58E-04 | 1.74E-03 |
| EFCAB4A | -0.2831  | 6.02E-11 | 2.92E-10 |
| EFCAB4B | -0.03011 | 4.95E-01 | 5.60E-01 |
| EFCAB5  | -0.18508 | 2.37E-05 | 6.04E-05 |
| EFCAB6  | -0.46225 | 1.26E-28 | 2.93E-27 |
| EFCAB7  | -0.0312  | 4.80E-01 | 5.45E-01 |
| EFEMP1  | -0.2243  | 2.70E-07 | 8.79E-07 |
| EFEMP2  | -0.13723 | 1.80E-03 | 3.47E-03 |
| EFHA1   | -0.11423 | 9.47E-03 | 1.61E-02 |
| EFHA2   | -0.28095 | 8.49E-11 | 4.06E-10 |
| EFHB    | -0.30979 | 6.44E-13 | 3.87E-12 |
| EFHC1   | -0.31039 | 5.79E-13 | 3.48E-12 |
| EFHC2   | -0.24656 | 1.43E-08 | 5.36E-08 |
| EFHD1   | -0.1486  | 7.17E-04 | 1.47E-03 |
| EFHD2   | 0.288541 | 2.48E-11 | 1.25E-10 |
| EFNA1   | -0.28945 | 2.13E-11 | 1.08E-10 |
| EFNA2   | 0.168829 | 1.18E-04 | 2.73E-04 |
| EFNA3   | 0.166079 | 1.53E-04 | 3.47E-04 |
| EFNA4   | -0.06611 | 1.34E-01 | 1.79E-01 |
| EFNA5   | -0.01643 | 7.10E-01 | 7.57E-01 |
| EFNB1   | -0.05358 | 2.25E-01 | 2.83E-01 |
| EFNB2   | -0.05373 | 2.24E-01 | 2.81E-01 |
| EFNB3   | -0.11998 | 6.41E-03 | 1.13E-02 |
| EFR3A   | -0.02933 | 5.07E-01 | 5.71E-01 |
| EFR3B   | -0.05767 | 1.91E-01 | 2.45E-01 |
| EFS     | -0.05077 | 2.50E-01 | 3.11E-01 |
| EFTUD1  | -0.03543 | 4.22E-01 | 4.88E-01 |
| EFTUD2  | 0.542109 | 1.12E-40 | 5.36E-39 |
| EGFL6   | -0.03263 | 4.60E-01 | 5.26E-01 |
| EGFL7   | -0.2365  | 5.60E-08 | 1.96E-07 |
| EGFL8   | -0.04625 | 2.95E-01 | 3.58E-01 |
| EGFLAM  | 0.217992 | 5.88E-07 | 1.83E-06 |
| EGFR    | -0.04509 | 3.07E-01 | 3.71E-01 |
| EGF     | 0.023518 | 5.94E-01 | 6.52E-01 |
| EGLN1   | 0.069182 | 1.17E-01 | 1.58E-01 |
| EGLN2   | -0.25146 | 7.21E-09 | 2.80E-08 |
| EGLN3   | 0.408285 | 4.15E-22 | 5.77E-21 |
| EGOT    | -0.10173 | 2.09E-02 | 3.34E-02 |
| EGR1    | -0.23898 | 4.02E-08 | 1.43E-07 |
| EGR2    | -0.08772 | 4.66E-02 | 6.92E-02 |
| EGR3    | -0.12446 | 4.68E-03 | 8.44E-03 |

|         |          |          |          |
|---------|----------|----------|----------|
| EGR4    | 0.053601 | 2.25E-01 | 2.82E-01 |
| EHBP1L1 | -0.06399 | 1.47E-01 | 1.94E-01 |
| EHBP1   | 0.376404 | 8.85E-19 | 9.23E-18 |
| EHD1    | 0.014039 | 7.51E-01 | 7.92E-01 |
| EHD2    | -0.33116 | 1.20E-14 | 8.48E-14 |
| EHD3    | 0.117376 | 7.67E-03 | 1.33E-02 |
| EHD4    | 0.036431 | 4.09E-01 | 4.76E-01 |
| EHF     | -0.19187 | 1.16E-05 | 3.09E-05 |
| EHHADH  | 0.129503 | 3.24E-03 | 6.00E-03 |
| EHMT1   | 0.056684 | 1.99E-01 | 2.54E-01 |
| EHMT2   | 0.035308 | 4.24E-01 | 4.90E-01 |
| EI24    | 0.088721 | 4.42E-02 | 6.59E-02 |
| EID1    | -0.20882 | 1.75E-06 | 5.16E-06 |
| EID2B   | -0.07033 | 1.11E-01 | 1.51E-01 |
| EID2    | -0.03024 | 4.93E-01 | 5.58E-01 |
| EID3    | 0.210872 | 1.38E-06 | 4.10E-06 |
| EIF1AD  | 0.287647 | 2.87E-11 | 1.44E-10 |
| EIF1AX  | 0.077169 | 8.02E-02 | 1.13E-01 |
| EIF1AY  | 0.030567 | 4.89E-01 | 5.54E-01 |
| EIF1B   | -0.04739 | 2.83E-01 | 3.45E-01 |
| EIF1    | 0.07953  | 7.13E-02 | 1.02E-01 |
| EIF2AK1 | 0.265078 | 9.93E-10 | 4.25E-09 |
| EIF2AK2 | 0.570385 | 8.90E-46 | 5.34E-44 |
| EIF2AK3 | 0.079721 | 7.07E-02 | 1.01E-01 |
| EIF2AK4 | 0.032057 | 4.68E-01 | 5.34E-01 |
| EIF2A   | 0.169359 | 1.12E-04 | 2.60E-04 |
| EIF2B1  | 0.388411 | 5.44E-20 | 6.34E-19 |
| EIF2B2  | 0.240956 | 3.08E-08 | 1.11E-07 |
| EIF2B3  | 0.236823 | 5.36E-08 | 1.88E-07 |
| EIF2B4  | 0.152201 | 5.29E-04 | 1.11E-03 |
| EIF2B5  | 0.160714 | 2.50E-04 | 5.50E-04 |
| EIF2C1  | -0.08877 | 4.41E-02 | 6.57E-02 |
| EIF2C2  | 0.411083 | 2.03E-22 | 2.89E-21 |
| EIF2C3  | 0.310594 | 5.58E-13 | 3.36E-12 |
| EIF2C4  | -0.36798 | 5.86E-18 | 5.66E-17 |
| EIF2S1  | 0.513604 | 5.25E-36 | 1.91E-34 |
| EIF2S2  | 0.53498  | 1.81E-39 | 8.15E-38 |
| EIF2S3  | 0.183609 | 2.76E-05 | 6.95E-05 |
| EIF3A   | 0.122658 | 5.31E-03 | 9.49E-03 |
| EIF3B   | 0.381548 | 2.72E-19 | 2.98E-18 |
| EIF3CL  | -0.15085 | 5.93E-04 | 1.23E-03 |
| EIF3C   | 0.228016 | 1.69E-07 | 5.61E-07 |
| EIF3D   | 0.131073 | 2.88E-03 | 5.38E-03 |
| EIF3E   | 0.039883 | 3.66E-01 | 4.33E-01 |

|           |          |          |          |
|-----------|----------|----------|----------|
| EIF3F     | -0.07756 | 7.87E-02 | 1.11E-01 |
| EIF3G     | -0.07579 | 8.58E-02 | 1.20E-01 |
| EIF3H     | 0.065296 | 1.39E-01 | 1.85E-01 |
| EIF3IP1   | 0.053912 | 2.22E-01 | 2.80E-01 |
| EIF3I     | 0.238576 | 4.25E-08 | 1.51E-07 |
| EIF3J     | 0.343546 | 1.03E-15 | 8.07E-15 |
| EIF3K     | 0.10241  | 2.01E-02 | 3.22E-02 |
| EIF3L     | -0.26602 | 8.61E-10 | 3.71E-09 |
| EIF3M     | 0.308332 | 8.35E-13 | 4.95E-12 |
| EIF4A1    | 0.331243 | 1.18E-14 | 8.36E-14 |
| EIF4A2    | 0.016529 | 7.08E-01 | 7.56E-01 |
| EIF4A3    | 0.527375 | 3.30E-38 | 1.36E-36 |
| EIF4B     | -0.08932 | 4.27E-02 | 6.39E-02 |
| EIF4E1B   | 0.035943 | 4.16E-01 | 4.82E-01 |
| EIF4E2    | 0.058603 | 1.84E-01 | 2.37E-01 |
| EIF4E3    | -0.32501 | 3.91E-14 | 2.63E-13 |
| EIF4EBP1  | 0.564128 | 1.32E-44 | 7.53E-43 |
| EIF4EBP2  | -0.24545 | 1.67E-08 | 6.20E-08 |
| EIF4EBP3  | -0.40072 | 2.76E-21 | 3.60E-20 |
| EIF4ENIF1 | -0.21936 | 4.98E-07 | 1.57E-06 |
| EIF4E     | 0.391127 | 2.85E-20 | 3.42E-19 |
| EIF4G1    | 0.271265 | 3.88E-10 | 1.74E-09 |
| EIF4G2    | 0.176228 | 5.79E-05 | 1.40E-04 |
| EIF4G3    | 0.086311 | 5.03E-02 | 7.41E-02 |
| EIF4H     | 0.216992 | 6.64E-07 | 2.06E-06 |
| EIF5A2    | 0.319544 | 1.09E-13 | 7.03E-13 |
| EIF5AL1   | 0.414276 | 8.93E-23 | 1.31E-21 |
| EIF5A     | 0.388978 | 4.75E-20 | 5.59E-19 |
| EIF5B     | 0.287758 | 2.82E-11 | 1.42E-10 |
| EIF5      | 0.112768 | 1.04E-02 | 1.77E-02 |
| EIF6      | 0.220151 | 4.51E-07 | 1.43E-06 |
| ELAC1     | -0.20752 | 2.04E-06 | 5.95E-06 |
| ELAC2     | 0.006859 | 8.77E-01 | 9.00E-01 |
| ELANE     | -0.39613 | 8.51E-21 | 1.07E-19 |
| ELAVL1    | 0.348066 | 4.10E-16 | 3.34E-15 |
| ELAVL2    | 0.085542 | 5.24E-02 | 7.69E-02 |
| ELAVL3    | 0.122413 | 5.41E-03 | 9.65E-03 |
| ELAVL4    | 0.11073  | 1.19E-02 | 2.00E-02 |
| ELF1      | -0.11907 | 6.83E-03 | 1.19E-02 |
| ELF2      | -0.19411 | 9.14E-06 | 2.46E-05 |
| ELF3      | -0.12076 | 6.07E-03 | 1.07E-02 |
| ELF4      | 0.111662 | 1.12E-02 | 1.89E-02 |
| ELF5      | -0.27457 | 2.33E-10 | 1.07E-09 |
| ELFN1     | 0.08085  | 6.68E-02 | 9.61E-02 |

|         |          |          |          |
|---------|----------|----------|----------|
| ELFN2   | -0.24193 | 2.70E-08 | 9.81E-08 |
| ELK1    | 0.409123 | 3.35E-22 | 4.69E-21 |
| ELK3    | 0.117724 | 7.49E-03 | 1.30E-02 |
| ELK4    | 0.038575 | 3.82E-01 | 4.49E-01 |
| ELL2    | -0.05175 | 2.41E-01 | 3.01E-01 |
| ELL3    | -0.22927 | 1.44E-07 | 4.83E-07 |
| ELL     | -0.12957 | 3.22E-03 | 5.97E-03 |
| ELMO1   | -0.37354 | 1.69E-18 | 1.73E-17 |
| ELMO2   | -0.18822 | 1.71E-05 | 4.45E-05 |
| ELMO3   | -0.25345 | 5.44E-09 | 2.14E-08 |
| ELMOD1  | -0.1217  | 5.69E-03 | 1.01E-02 |
| ELMOD2  | 0.255774 | 3.90E-09 | 1.56E-08 |
| ELMOD3  | -0.20837 | 1.84E-06 | 5.41E-06 |
| ELN     | -0.5095  | 2.27E-35 | 7.99E-34 |
| ELOF1   | -0.02635 | 5.51E-01 | 6.12E-01 |
| ELOVL1  | -0.13142 | 2.81E-03 | 5.25E-03 |
| ELOVL2  | 0.161451 | 2.34E-04 | 5.18E-04 |
| ELOVL3  | 0.135206 | 2.11E-03 | 4.01E-03 |
| ELOVL4  | 0.365104 | 1.10E-17 | 1.04E-16 |
| ELOVL5  | 0.165206 | 1.66E-04 | 3.74E-04 |
| ELOVL6  | 0.548595 | 8.33E-42 | 4.17E-40 |
| ELOVL7  | 0.326339 | 3.04E-14 | 2.06E-13 |
| ELP2P   | -0.03527 | 4.24E-01 | 4.90E-01 |
| ELP2    | 0.073176 | 9.72E-02 | 1.34E-01 |
| ELP3    | -0.11522 | 8.87E-03 | 1.52E-02 |
| ELP4    | 0.132236 | 2.64E-03 | 4.96E-03 |
| ELSPBP1 | 0.112184 | 1.08E-02 | 1.83E-02 |
| ELTD1   | -0.03973 | 3.68E-01 | 4.34E-01 |
| EMB     | -0.24212 | 2.63E-08 | 9.56E-08 |
| EMCN    | -0.48783 | 3.81E-32 | 1.12E-30 |
| EMD     | 0.053496 | 2.26E-01 | 2.83E-01 |
| EME1    | 0.729894 | 8.38E-87 | 1.12E-84 |
| EME2    | -0.0709  | 1.08E-01 | 1.48E-01 |
| EMG1    | 0.282657 | 6.46E-11 | 3.13E-10 |
| EMID1   | -0.15784 | 3.23E-04 | 7.00E-04 |
| EMID2   | 0.054914 | 2.13E-01 | 2.70E-01 |
| EMILIN1 | -0.00534 | 9.04E-01 | 9.22E-01 |
| EMILIN2 | 0.025038 | 5.71E-01 | 6.30E-01 |
| EMILIN3 | 0.022898 | 6.04E-01 | 6.61E-01 |
| EML1    | -0.2443  | 1.96E-08 | 7.21E-08 |
| EML2    | -0.17381 | 7.34E-05 | 1.75E-04 |
| EML3    | -0.23936 | 3.82E-08 | 1.36E-07 |
| EML4    | 0.12165  | 5.71E-03 | 1.01E-02 |
| EML5    | -0.24626 | 1.49E-08 | 5.58E-08 |

|        |          |          |          |
|--------|----------|----------|----------|
| EML6   | -0.02128 | 6.30E-01 | 6.85E-01 |
| EMP1   | -0.05169 | 2.42E-01 | 3.01E-01 |
| EMP2   | -0.48859 | 2.96E-32 | 8.79E-31 |
| EMP3   | 0.07146  | 1.05E-01 | 1.44E-01 |
| EMR1   | 0.001204 | 9.78E-01 | 9.84E-01 |
| EMR2   | 0.184265 | 2.58E-05 | 6.53E-05 |
| EMR3   | -0.16343 | 1.95E-04 | 4.37E-04 |
| EMR4P  | -0.25044 | 8.33E-09 | 3.21E-08 |
| EMX1   | 0.018828 | 6.70E-01 | 7.21E-01 |
| EMX2OS | 0.026372 | 5.50E-01 | 6.12E-01 |
| EMX2   | 0.081301 | 6.52E-02 | 9.41E-02 |
| EN1    | 0.121957 | 5.58E-03 | 9.94E-03 |
| EN2    | -0.08589 | 5.14E-02 | 7.56E-02 |
| ENAH   | 0.143458 | 1.10E-03 | 2.19E-03 |
| ENAM   | -0.34029 | 1.99E-15 | 1.51E-14 |
| ENC1   | -0.30739 | 9.87E-13 | 5.80E-12 |
| ENDOD1 | -0.21965 | 4.80E-07 | 1.52E-06 |
| ENDOG  | -0.11794 | 7.38E-03 | 1.28E-02 |
| ENDOU  | -0.26222 | 1.52E-09 | 6.36E-09 |
| ENGASE | -0.317   | 1.74E-13 | 1.10E-12 |
| ENG    | -0.34233 | 1.32E-15 | 1.02E-14 |
| ENHO   | -0.05458 | 2.16E-01 | 2.73E-01 |
| ENKUR  | -0.17583 | 6.03E-05 | 1.45E-04 |
| ENO1   | 0.3899   | 3.82E-20 | 4.52E-19 |
| ENO2   | 0.150562 | 6.08E-04 | 1.26E-03 |
| ENO3   | -0.07474 | 9.02E-02 | 1.26E-01 |
| ENOPH1 | 0.511719 | 1.03E-35 | 3.69E-34 |
| ENOSF1 | -0.17438 | 6.95E-05 | 1.66E-04 |
| ENOX1  | 0.19678  | 6.83E-06 | 1.87E-05 |
| ENOX2  | 0.22251  | 3.37E-07 | 1.09E-06 |
| ENPEP  | 0.048538 | 2.72E-01 | 3.33E-01 |
| ENPP1  | 0.304343 | 1.69E-12 | 9.70E-12 |
| ENPP2  | -0.13955 | 1.50E-03 | 2.93E-03 |
| ENPP3  | -0.16842 | 1.23E-04 | 2.83E-04 |
| ENPP4  | -0.34764 | 4.48E-16 | 3.64E-15 |
| ENPP5  | -0.35231 | 1.70E-16 | 1.44E-15 |
| ENPP6  | -0.22357 | 2.96E-07 | 9.58E-07 |
| ENPP7  | 0.048766 | 2.69E-01 | 3.31E-01 |
| ENSA   | -0.03986 | 3.67E-01 | 4.33E-01 |
| ENTHD1 | 0.193453 | 9.81E-06 | 2.63E-05 |
| ENTPD1 | -0.07206 | 1.02E-01 | 1.41E-01 |
| ENTPD2 | 0.068925 | 1.18E-01 | 1.60E-01 |
| ENTPD3 | -0.41464 | 8.13E-23 | 1.19E-21 |
| ENTPD4 | -0.03413 | 4.40E-01 | 5.06E-01 |



|          |          |          |          |
|----------|----------|----------|----------|
| ENTPD5   | 0.104577 | 1.76E-02 | 2.85E-02 |
| ENTPD6   | -0.03765 | 3.94E-01 | 4.61E-01 |
| ENTPD7   | 0.380735 | 3.28E-19 | 3.56E-18 |
| ENTPD8   | -0.05409 | 2.20E-01 | 2.78E-01 |
| ENY2     | 0.286868 | 3.26E-11 | 1.63E-10 |
| EOMES    | 0.074738 | 9.02E-02 | 1.26E-01 |
| EP300    | -0.1358  | 2.01E-03 | 3.85E-03 |
| EP400NL  | 0.081734 | 6.38E-02 | 9.22E-02 |
| EP400    | 0.096595 | 2.84E-02 | 4.40E-02 |
| EPAS1    | -0.31931 | 1.14E-13 | 7.32E-13 |
| EPB41L1  | -0.34133 | 1.62E-15 | 1.23E-14 |
| EPB41L2  | -0.0829  | 6.01E-02 | 8.73E-02 |
| EPB41L3  | 0.037651 | 3.94E-01 | 4.61E-01 |
| EPB41L4A | -0.45603 | 8.18E-28 | 1.80E-26 |
| EPB41L4B | -0.02847 | 5.19E-01 | 5.83E-01 |
| EPB41L5  | -0.24217 | 2.61E-08 | 9.50E-08 |
| EPB41    | -0.1779  | 4.91E-05 | 1.20E-04 |
| EPB42    | -0.04301 | 3.30E-01 | 3.95E-01 |
| EPB49    | -0.31112 | 5.08E-13 | 3.08E-12 |
| EPC1     | -0.25074 | 7.99E-09 | 3.08E-08 |
| EPC2     | -0.19131 | 1.23E-05 | 3.27E-05 |
| EPCAM    | 0.135563 | 2.05E-03 | 3.92E-03 |
| EPDR1    | -0.38065 | 3.34E-19 | 3.63E-18 |
| EPGN     | 0.07628  | 8.37E-02 | 1.18E-01 |
| EPHA10   | -0.1884  | 1.68E-05 | 4.37E-05 |
| EPHA1    | 0.039889 | 3.66E-01 | 4.33E-01 |
| EPHA2    | -0.11162 | 1.12E-02 | 1.89E-02 |
| EPHA3    | -0.27622 | 1.80E-10 | 8.35E-10 |
| EPHA4    | -0.40371 | 1.31E-21 | 1.75E-20 |
| EPHA5    | -0.03581 | 4.17E-01 | 4.84E-01 |
| EPHA6    | 0.279038 | 1.15E-10 | 5.45E-10 |
| EPHA7    | 0.056714 | 1.99E-01 | 2.54E-01 |
| EPHA8    | 0.097032 | 2.77E-02 | 4.30E-02 |
| EPHB1    | 0.039164 | 3.75E-01 | 4.41E-01 |
| EPHB2    | 0.228721 | 1.54E-07 | 5.16E-07 |
| EPHB3    | -0.06906 | 1.18E-01 | 1.59E-01 |
| EPHB4    | -0.01601 | 7.17E-01 | 7.64E-01 |
| EPHB6    | -0.27021 | 4.56E-10 | 2.03E-09 |
| EPHX1    | -0.42942 | 1.60E-24 | 2.72E-23 |
| EPHX2    | -0.45475 | 1.20E-27 | 2.60E-26 |
| EPHX3    | -0.14444 | 1.01E-03 | 2.03E-03 |
| EPHX4    | 0.246399 | 1.46E-08 | 5.47E-08 |
| EPM2AIP1 | -0.33471 | 6.02E-15 | 4.37E-14 |
| EPM2A    | -0.22605 | 2.16E-07 | 7.13E-07 |

|         |          |           |           |
|---------|----------|-----------|-----------|
| EPN1    | 0.051176 | 2.46E-01  | 3.06E-01  |
| EPN2    | -0.19032 | 1.37E-05  | 3.60E-05  |
| EPN3    | 0.121884 | 5.61E-03  | 9.99E-03  |
| EPOR    | -0.26653 | 7.98E-10  | 3.46E-09  |
| EPO     | 0.069215 | 1.17E-01  | 1.58E-01  |
| EPPK1   | -0.12106 | 5.94E-03  | 1.05E-02  |
| EPR1    | 0.816852 | 1.14E-124 | 2.89E-122 |
| EPRS    | 0.180562 | 3.76E-05  | 9.30E-05  |
| EPS15L1 | 0.022762 | 6.06E-01  | 6.63E-01  |
| EPS15   | -0.15209 | 5.34E-04  | 1.12E-03  |
| EPS8L1  | -0.17092 | 9.70E-05  | 2.27E-04  |
| EPS8L2  | -0.30265 | 2.27E-12  | 1.29E-11  |
| EPS8L3  | 0.112758 | 1.04E-02  | 1.77E-02  |
| EPS8    | -0.22649 | 2.05E-07  | 6.76E-07  |
| EPST11  | 0.34139  | 1.60E-15  | 1.22E-14  |
| EPT1    | 0.60153  | 5.38E-52  | 3.84E-50  |
| EPX     | -0.26413 | 1.14E-09  | 4.86E-09  |
| EPYC    | 0.188029 | 1.75E-05  | 4.53E-05  |
| ERAL1   | 0.355148 | 9.37E-17  | 8.14E-16  |
| ERAP1   | -0.05665 | 1.99E-01  | 2.54E-01  |
| ERAP2   | -0.01698 | 7.01E-01  | 7.49E-01  |
| ERAS    | -0.0745  | 9.12E-02  | 1.27E-01  |
| ERBB2IP | -0.10512 | 1.70E-02  | 2.76E-02  |
| ERBB2   | -0.20005 | 4.76E-06  | 1.33E-05  |
| ERBB3   | -0.28475 | 4.61E-11  | 2.26E-10  |
| ERBB4   | -0.44976 | 5.18E-27  | 1.07E-25  |
| ERC1    | 0.034248 | 4.38E-01  | 5.05E-01  |
| ERC2    | 0.023549 | 5.94E-01  | 6.52E-01  |
| ERCC1   | 0.100645 | 2.24E-02  | 3.54E-02  |
| ERCC2   | 0.0848   | 5.45E-02  | 7.97E-02  |
| ERCC3   | 0.207409 | 2.06E-06  | 6.01E-06  |
| ERCC4   | -0.04437 | 3.15E-01  | 3.79E-01  |
| ERCC5   | -0.36863 | 5.07E-18  | 4.93E-17  |
| ERCC6L  | 0.80973  | 7.48E-121 | 1.80E-118 |
| ERCC6   | -0.12792 | 3.64E-03  | 6.68E-03  |
| ERCC8   | 0.250289 | 8.51E-09  | 3.27E-08  |
| EREG    | 0.245081 | 1.76E-08  | 6.51E-08  |
| ERF     | 0.093777 | 3.34E-02  | 5.10E-02  |
| ERGIC1  | -0.231   | 1.15E-07  | 3.90E-07  |
| ERGIC2  | 0.530465 | 1.02E-38  | 4.37E-37  |
| ERGIC3  | -0.0366  | 4.07E-01  | 4.74E-01  |
| ERG     | -0.41169 | 1.74E-22  | 2.49E-21  |
| ERH     | 0.349408 | 3.11E-16  | 2.56E-15  |
| ERI1    | 0.343063 | 1.14E-15  | 8.85E-15  |

|          |          |           |           |
|----------|----------|-----------|-----------|
| ERI2     | -0.0171  | 6.99E-01  | 7.47E-01  |
| ERI3     | 0.153911 | 4.56E-04  | 9.64E-04  |
| ERICH1   | -0.21044 | 1.45E-06  | 4.30E-06  |
| ERLEC1   | -0.01383 | 7.54E-01  | 7.96E-01  |
| ERLIN1   | 0.428293 | 2.17E-24  | 3.66E-23  |
| ERLIN2   | 0.097863 | 2.64E-02  | 4.12E-02  |
| ERMAP    | -0.37202 | 2.38E-18  | 2.40E-17  |
| ERMN     | -0.0732  | 9.70E-02  | 1.34E-01  |
| ERMP1    | 0.262873 | 1.38E-09  | 5.80E-09  |
| ERN1     | -0.1635  | 1.94E-04  | 4.35E-04  |
| ERN2     | -0.30742 | 9.83E-13  | 5.78E-12  |
| ERO1LB   | -0.26207 | 1.55E-09  | 6.49E-09  |
| ERO1L    | 0.564575 | 1.09E-44  | 6.27E-43  |
| ERP27    | -0.30934 | 6.98E-13  | 4.17E-12  |
| ERP29    | -0.07414 | 9.28E-02  | 1.29E-01  |
| ERP44    | 0.006899 | 8.76E-01  | 8.99E-01  |
| ERRFI1   | 0.185781 | 2.21E-05  | 5.65E-05  |
| ERVFRDE1 | -0.41362 | 1.06E-22  | 1.54E-21  |
| ESAM     | -0.39807 | 5.30E-21  | 6.77E-20  |
| ESCO1    | 0.174804 | 6.66E-05  | 1.59E-04  |
| ESCO2    | 0.842557 | 5.80E-140 | 2.27E-137 |
| ESD      | -0.09864 | 2.52E-02  | 3.95E-02  |
| ESF1     | 0.248432 | 1.10E-08  | 4.18E-08  |
| ESM1     | 0.234977 | 6.84E-08  | 2.38E-07  |
| ESPL1    | 0.819282 | 5.22E-126 | 1.34E-123 |
| ESPNL    | -0.05073 | 2.51E-01  | 3.11E-01  |
| ESPNP    | -0.18558 | 2.25E-05  | 5.76E-05  |
| ESPN     | 0.031843 | 4.71E-01  | 5.37E-01  |
| ESR1     | 0.018147 | 6.81E-01  | 7.31E-01  |
| ESR2     | -0.08972 | 4.18E-02  | 6.27E-02  |
| ESRP1    | 0.070275 | 1.11E-01  | 1.51E-01  |
| ESRP2    | -0.36451 | 1.25E-17  | 1.18E-16  |
| ESRRA    | -0.02253 | 6.10E-01  | 6.67E-01  |
| ESRRB    | 0.008674 | 8.44E-01  | 8.73E-01  |
| ESRRG    | -0.12548 | 4.34E-03  | 7.88E-03  |
| ESX1     | 0.261325 | 1.73E-09  | 7.22E-09  |
| ESYT1    | 0.179429 | 4.22E-05  | 1.04E-04  |
| ESYT2    | 0.05777  | 1.91E-01  | 2.44E-01  |
| ESYT3    | -0.50662 | 6.28E-35  | 2.14E-33  |
| ETAA1    | -0.06182 | 1.61E-01  | 2.11E-01  |
| ETF1     | 0.156126 | 3.76E-04  | 8.06E-04  |
| ETFA     | 0.251481 | 7.19E-09  | 2.79E-08  |
| ETFB     | -0.10839 | 1.39E-02  | 2.29E-02  |
| ETFDH    | -0.19197 | 1.15E-05  | 3.05E-05  |

|         |          |           |           |
|---------|----------|-----------|-----------|
| ETHE1   | 0.15819  | 3.13E-04  | 6.80E-04  |
| ETNK1   | 0.149621 | 6.58E-04  | 1.36E-03  |
| ETNK2   | 0.043542 | 3.24E-01  | 3.89E-01  |
| ETS1    | -0.07004 | 1.12E-01  | 1.53E-01  |
| ETS2    | -0.2116  | 1.26E-06  | 3.78E-06  |
| ETV1    | -0.26168 | 1.65E-09  | 6.86E-09  |
| ETV2    | -0.09134 | 3.83E-02  | 5.78E-02  |
| ETV3L   | 0.039254 | 3.74E-01  | 4.40E-01  |
| ETV3    | -0.0528  | 2.32E-01  | 2.90E-01  |
| ETV4    | -0.14906 | 6.90E-04  | 1.42E-03  |
| ETV5    | -0.27192 | 3.51E-10  | 1.58E-09  |
| ETV6    | 0.10809  | 1.41E-02  | 2.33E-02  |
| ETV7    | 0.146878 | 8.28E-04  | 1.68E-03  |
| EVC2    | -0.10682 | 1.53E-02  | 2.51E-02  |
| EVC     | -0.29499 | 8.45E-12  | 4.49E-11  |
| EVI2A   | -0.05882 | 1.83E-01  | 2.35E-01  |
| EVI2B   | -0.16011 | 2.64E-04  | 5.79E-04  |
| EVI5L   | -0.14229 | 1.21E-03  | 2.39E-03  |
| EVI5    | -0.23077 | 1.18E-07  | 4.01E-07  |
| EVL     | -0.22219 | 3.51E-07  | 1.13E-06  |
| EVPLL   | -0.39475 | 1.19E-20  | 1.47E-19  |
| EVPL    | -0.30379 | 1.86E-12  | 1.07E-11  |
| EVX1    | 0.194462 | 8.80E-06  | 2.37E-05  |
| EVX2    | 0.08874  | 4.41E-02  | 6.58E-02  |
| EWSR1   | 0.054893 | 2.14E-01  | 2.70E-01  |
| EXD1    | -0.02577 | 5.60E-01  | 6.20E-01  |
| EXD2    | -0.00713 | 8.72E-01  | 8.96E-01  |
| EXD3    | -0.31902 | 1.20E-13  | 7.70E-13  |
| EXO1    | 0.868063 | 3.93E-158 | 3.27E-155 |
| EXOC1   | 0.124102 | 4.80E-03  | 8.64E-03  |
| EXOC2   | 0.174667 | 6.75E-05  | 1.61E-04  |
| EXOC3L2 | -0.09886 | 2.49E-02  | 3.91E-02  |
| EXOC3L  | -0.21509 | 8.34E-07  | 2.55E-06  |
| EXOC3   | -0.01832 | 6.78E-01  | 7.29E-01  |
| EXOC4   | 0.067621 | 1.25E-01  | 1.69E-01  |
| EXOC5   | 0.376434 | 8.79E-19  | 9.18E-18  |
| EXOC6B  | 0.134325 | 2.25E-03  | 4.27E-03  |
| EXOC6   | 0.077495 | 7.89E-02  | 1.12E-01  |
| EXOC7   | -0.01089 | 8.05E-01  | 8.39E-01  |
| EXOC8   | -0.3422  | 1.36E-15  | 1.04E-14  |
| EXOG    | 0.046181 | 2.96E-01  | 3.59E-01  |
| EXOSC10 | 0.2698   | 4.86E-10  | 2.16E-09  |
| EXOSC1  | 0.123562 | 4.98E-03  | 8.96E-03  |
| EXOSC2  | 0.457159 | 5.84E-28  | 1.30E-26  |

|        |          |          |          |
|--------|----------|----------|----------|
| EXOSC3 | 0.447408 | 1.03E-26 | 2.07E-25 |
| EXOSC4 | 0.140684 | 1.37E-03 | 2.70E-03 |
| EXOSC5 | 0.163206 | 1.99E-04 | 4.45E-04 |
| EXOSC6 | 0.006631 | 8.81E-01 | 9.03E-01 |
| EXOSC7 | -0.05821 | 1.87E-01 | 2.41E-01 |
| EXOSC8 | 0.298499 | 4.65E-12 | 2.55E-11 |
| EXOSC9 | 0.422901 | 9.26E-24 | 1.49E-22 |
| EXPH5  | -0.29368 | 1.05E-11 | 5.54E-11 |
| EXT1   | 0.10151  | 2.12E-02 | 3.38E-02 |
| EXT2   | 0.135797 | 2.01E-03 | 3.85E-03 |
| EXTL1  | -0.12057 | 6.15E-03 | 1.09E-02 |
| EXTL2  | 0.069747 | 1.14E-01 | 1.55E-01 |
| EXTL3  | 0.054432 | 2.18E-01 | 2.74E-01 |
| EYA1   | -0.0901  | 4.10E-02 | 6.15E-02 |
| EYA2   | 0.093131 | 3.46E-02 | 5.27E-02 |
| EYA3   | 0.075754 | 8.59E-02 | 1.20E-01 |
| EYA4   | 0.001424 | 9.74E-01 | 9.80E-01 |
| EYS    | -0.13793 | 1.70E-03 | 3.30E-03 |
| EZH1   | -0.46943 | 1.39E-29 | 3.48E-28 |
| EZH2   | 0.713366 | 3.02E-81 | 3.75E-79 |
| EZR    | -0.19473 | 8.55E-06 | 2.31E-05 |
| F10    | -0.32369 | 5.01E-14 | 3.34E-13 |
| F11R   | -0.19317 | 1.01E-05 | 2.70E-05 |
| F11    | -0.42838 | 2.12E-24 | 3.58E-23 |
| F12    | 0.378408 | 5.60E-19 | 5.93E-18 |
| F13A1  | -0.17475 | 6.70E-05 | 1.60E-04 |
| F13B   | 0.111176 | 1.16E-02 | 1.94E-02 |
| F2RL1  | -0.06433 | 1.45E-01 | 1.92E-01 |
| F2RL2  | -0.02269 | 6.07E-01 | 6.64E-01 |
| F2RL3  | -0.05511 | 2.12E-01 | 2.68E-01 |
| F2R    | -0.01701 | 7.00E-01 | 7.49E-01 |
| F2     | 0.20856  | 1.81E-06 | 5.30E-06 |
| F3     | -0.0878  | 4.64E-02 | 6.89E-02 |
| F5     | 0.203046 | 3.40E-06 | 9.68E-06 |
| F7     | 0.128858 | 3.40E-03 | 6.27E-03 |
| F8A1   | 0.085475 | 5.26E-02 | 7.71E-02 |
| F8     | -0.37841 | 5.60E-19 | 5.93E-18 |
| F9     | 0.004843 | 9.13E-01 | 9.30E-01 |
| FA2H   | -0.02532 | 5.66E-01 | 6.26E-01 |
| FAAH2  | -0.18695 | 1.96E-05 | 5.04E-05 |
| FAAH   | -0.44432 | 2.49E-26 | 4.90E-25 |
| FABP12 | -0.04175 | 3.44E-01 | 4.10E-01 |
| FABP1  | 0.045967 | 2.98E-01 | 3.61E-01 |
| FABP2  | 0.023224 | 5.99E-01 | 6.57E-01 |

|          |          |          |          |
|----------|----------|----------|----------|
| FABP3    | -0.15318 | 4.86E-04 | 1.02E-03 |
| FABP4    | -0.21812 | 5.79E-07 | 1.81E-06 |
| FABP5L3  | -0.02841 | 5.20E-01 | 5.84E-01 |
| FABP5    | 0.061129 | 1.66E-01 | 2.16E-01 |
| FABP6    | 0.024583 | 5.78E-01 | 6.37E-01 |
| FABP7    | 0.119696 | 6.54E-03 | 1.15E-02 |
| FABP9    | -0.0056  | 8.99E-01 | 9.19E-01 |
| FADD     | 0.293579 | 1.07E-11 | 5.63E-11 |
| FADS1    | 0.371058 | 2.95E-18 | 2.95E-17 |
| FADS2    | 0.296546 | 6.49E-12 | 3.49E-11 |
| FADS3    | -0.02216 | 6.16E-01 | 6.72E-01 |
| FADS6    | -0.13525 | 2.10E-03 | 4.00E-03 |
| FAF1     | 0.357127 | 6.16E-17 | 5.46E-16 |
| FAF2     | 0.026909 | 5.42E-01 | 6.05E-01 |
| FAHD1    | 0.0227   | 6.07E-01 | 6.64E-01 |
| FAHD2A   | 0.128133 | 3.58E-03 | 6.58E-03 |
| FAHD2B   | -0.0907  | 3.96E-02 | 5.97E-02 |
| FAH      | -0.16677 | 1.43E-04 | 3.27E-04 |
| FAIM2    | -0.1999  | 4.84E-06 | 1.35E-05 |
| FAIM3    | -0.29818 | 4.92E-12 | 2.69E-11 |
| FAIM     | -0.03197 | 4.69E-01 | 5.35E-01 |
| FAM100A  | -0.28973 | 2.04E-11 | 1.04E-10 |
| FAM100B  | 0.241174 | 2.99E-08 | 1.08E-07 |
| FAM101A  | 0.309243 | 7.10E-13 | 4.24E-12 |
| FAM101B  | -0.01911 | 6.65E-01 | 7.17E-01 |
| FAM102A  | 0.105379 | 1.67E-02 | 2.72E-02 |
| FAM102B  | 0.198547 | 5.62E-06 | 1.56E-05 |
| FAM103A1 | 0.207547 | 2.03E-06 | 5.93E-06 |
| FAM104A  | 0.376387 | 8.89E-19 | 9.26E-18 |
| FAM104B  | -0.1935  | 9.76E-06 | 2.61E-05 |
| FAM105A  | -0.3382  | 3.02E-15 | 2.25E-14 |
| FAM105B  | 0.259736 | 2.19E-09 | 9.00E-09 |
| FAM106A  | -0.12694 | 3.91E-03 | 7.14E-03 |
| FAM106C  | -0.1197  | 6.54E-03 | 1.15E-02 |
| FAM107A  | -0.41834 | 3.09E-23 | 4.73E-22 |
| FAM107B  | -0.19527 | 8.06E-06 | 2.18E-05 |
| FAM108A1 | -0.10909 | 1.32E-02 | 2.20E-02 |
| FAM108B1 | 0.006736 | 8.79E-01 | 9.02E-01 |
| FAM108C1 | -0.16038 | 2.58E-04 | 5.66E-04 |
| FAM109A  | -0.01377 | 7.55E-01 | 7.96E-01 |
| FAM109B  | -0.00992 | 8.22E-01 | 8.54E-01 |
| FAM10A4  | 0.027386 | 5.35E-01 | 5.98E-01 |
| FAM110A  | -0.10487 | 1.73E-02 | 2.80E-02 |
| FAM110B  | -0.17364 | 7.46E-05 | 1.77E-04 |

|           |          |          |          |
|-----------|----------|----------|----------|
| FAM110C   | -0.07101 | 1.07E-01 | 1.47E-01 |
| FAM111A   | 0.020622 | 6.41E-01 | 6.95E-01 |
| FAM111B   | 0.761119 | 1.63E-98 | 2.59E-96 |
| FAM113A   | -0.23058 | 1.21E-07 | 4.11E-07 |
| FAM113B   | 0.057093 | 1.96E-01 | 2.50E-01 |
| FAM114A1  | 0.2543   | 4.81E-09 | 1.90E-08 |
| FAM114A2  | -0.20611 | 2.40E-06 | 6.93E-06 |
| FAM115A   | 0.03577  | 4.18E-01 | 4.84E-01 |
| FAM115C   | 0.140905 | 1.35E-03 | 2.65E-03 |
| FAM116A   | 0.022699 | 6.07E-01 | 6.64E-01 |
| FAM116B   | -0.39039 | 3.40E-20 | 4.04E-19 |
| FAM117A   | -0.51725 | 1.40E-36 | 5.30E-35 |
| FAM117B   | -0.228   | 1.69E-07 | 5.62E-07 |
| FAM118A   | -0.14109 | 1.33E-03 | 2.61E-03 |
| FAM118B   | -0.12706 | 3.87E-03 | 7.08E-03 |
| FAM119A   | 0.298008 | 5.06E-12 | 2.76E-11 |
| FAM119B   | 0.043969 | 3.19E-01 | 3.84E-01 |
| FAM120AOS | -0.09246 | 3.59E-02 | 5.46E-02 |
| FAM120A   | -0.08564 | 5.21E-02 | 7.65E-02 |
| FAM120B   | -0.08956 | 4.22E-02 | 6.32E-02 |
| FAM120C   | -0.18254 | 3.08E-05 | 7.70E-05 |
| FAM122A   | -0.35181 | 1.89E-16 | 1.59E-15 |
| FAM122B   | 0.217275 | 6.41E-07 | 1.99E-06 |
| FAM122C   | 0.025317 | 5.66E-01 | 6.26E-01 |
| FAM123A   | 0.030127 | 4.95E-01 | 5.60E-01 |
| FAM123B   | -0.04963 | 2.61E-01 | 3.22E-01 |
| FAM123C   | 0.049046 | 2.67E-01 | 3.28E-01 |
| FAM124A   | 0.212701 | 1.11E-06 | 3.34E-06 |
| FAM124B   | -0.17552 | 6.21E-05 | 1.49E-04 |
| FAM125A   | -0.03693 | 4.03E-01 | 4.69E-01 |
| FAM125B   | -0.35599 | 7.84E-17 | 6.86E-16 |
| FAM126A   | 0.120613 | 6.13E-03 | 1.08E-02 |
| FAM126B   | -0.05826 | 1.87E-01 | 2.40E-01 |
| FAM127A   | 0.028524 | 5.18E-01 | 5.82E-01 |
| FAM127B   | 0.12309  | 5.15E-03 | 9.23E-03 |
| FAM127C   | 0.103909 | 1.83E-02 | 2.96E-02 |
| FAM128A   | 0.277794 | 1.40E-10 | 6.59E-10 |
| FAM128B   | 0.174125 | 7.12E-05 | 1.70E-04 |
| FAM129A   | -0.25295 | 5.84E-09 | 2.29E-08 |
| FAM129B   | -0.20803 | 1.92E-06 | 5.62E-06 |
| FAM129C   | -0.21489 | 8.55E-07 | 2.61E-06 |
| FAM131A   | 0.017902 | 6.85E-01 | 7.35E-01 |
| FAM131B   | -0.07433 | 9.20E-02 | 1.28E-01 |
| FAM131C   | 0.281704 | 7.53E-11 | 3.62E-10 |

|          |          |          |          |
|----------|----------|----------|----------|
| FAM132A  | 0.105976 | 1.61E-02 | 2.64E-02 |
| FAM133A  | 0.316023 | 2.08E-13 | 1.31E-12 |
| FAM133B  | 0.049288 | 2.64E-01 | 3.26E-01 |
| FAM134A  | -0.19191 | 1.16E-05 | 3.07E-05 |
| FAM134B  | -0.15622 | 3.73E-04 | 7.99E-04 |
| FAM134C  | -0.06472 | 1.42E-01 | 1.89E-01 |
| FAM135A  | 0.248402 | 1.11E-08 | 4.20E-08 |
| FAM135B  | -0.20292 | 3.45E-06 | 9.81E-06 |
| FAM136A  | 0.586494 | 6.56E-49 | 4.36E-47 |
| FAM136B  | 0.134806 | 2.17E-03 | 4.13E-03 |
| FAM138B  | -0.17895 | 4.43E-05 | 1.08E-04 |
| FAM138D  | -0.15262 | 5.10E-04 | 1.07E-03 |
| FAM138E  | -0.1074  | 1.48E-02 | 2.43E-02 |
| FAM138F  | -0.27253 | 3.19E-10 | 1.45E-09 |
| FAM13AOS | -0.3815  | 2.75E-19 | 3.01E-18 |
| FAM13A   | -0.26933 | 5.22E-10 | 2.31E-09 |
| FAM13B   | -0.38054 | 3.43E-19 | 3.71E-18 |
| FAM13C   | -0.35357 | 1.31E-16 | 1.12E-15 |
| FAM149A  | -0.37708 | 7.59E-19 | 7.95E-18 |
| FAM149B1 | -0.15492 | 4.18E-04 | 8.88E-04 |
| FAM150A  | -0.16898 | 1.17E-04 | 2.69E-04 |
| FAM150B  | -0.37625 | 9.17E-19 | 9.53E-18 |
| FAM151A  | -0.10629 | 1.58E-02 | 2.59E-02 |
| FAM151B  | -0.07005 | 1.12E-01 | 1.53E-01 |
| FAM153A  | -0.15434 | 4.40E-04 | 9.31E-04 |
| FAM153B  | -0.15535 | 4.03E-04 | 8.58E-04 |
| FAM153C  | -0.15268 | 5.07E-04 | 1.06E-03 |
| FAM154A  | -0.15088 | 5.92E-04 | 1.23E-03 |
| FAM154B  | -0.30555 | 1.37E-12 | 7.91E-12 |
| FAM155A  | 0.065802 | 1.36E-01 | 1.81E-01 |
| FAM155B  | -0.06956 | 1.15E-01 | 1.56E-01 |
| FAM156A  | -0.20882 | 1.75E-06 | 5.16E-06 |
| FAM157A  | -0.01553 | 7.25E-01 | 7.71E-01 |
| FAM157B  | -0.05058 | 2.52E-01 | 3.13E-01 |
| FAM158A  | 0.348074 | 4.10E-16 | 3.34E-15 |
| FAM159A  | -0.08208 | 6.27E-02 | 9.07E-02 |
| FAM160A1 | -0.06771 | 1.25E-01 | 1.68E-01 |
| FAM160A2 | -0.3835  | 1.73E-19 | 1.93E-18 |
| FAM160B1 | -0.1663  | 1.50E-04 | 3.41E-04 |
| FAM160B2 | -0.2429  | 2.37E-08 | 8.65E-08 |
| FAM161A  | 0.300338 | 3.39E-12 | 1.89E-11 |
| FAM161B  | -0.26755 | 6.84E-10 | 2.98E-09 |
| FAM162A  | 0.408248 | 4.18E-22 | 5.82E-21 |
| FAM162B  | -0.35435 | 1.11E-16 | 9.55E-16 |



|          |          |          |          |
|----------|----------|----------|----------|
| FAM163A  | 0.159536 | 2.78E-04 | 6.08E-04 |
| FAM163B  | 0.023766 | 5.91E-01 | 6.49E-01 |
| FAM164A  | -0.05909 | 1.81E-01 | 2.33E-01 |
| FAM164C  | -0.30244 | 2.35E-12 | 1.33E-11 |
| FAM165B  | -0.2587  | 2.55E-09 | 1.04E-08 |
| FAM166A  | -0.0774  | 7.93E-02 | 1.12E-01 |
| FAM166B  | -0.22666 | 2.00E-07 | 6.62E-07 |
| FAM167A  | -0.31101 | 5.17E-13 | 3.13E-12 |
| FAM167B  | -0.10327 | 1.91E-02 | 3.07E-02 |
| FAM168A  | 0.191247 | 1.24E-05 | 3.29E-05 |
| FAM168B  | -0.08068 | 6.73E-02 | 9.68E-02 |
| FAM169A  | 0.177299 | 5.21E-05 | 1.26E-04 |
| FAM169B  | -0.07746 | 7.91E-02 | 1.12E-01 |
| FAM170A  | -0.00658 | 8.82E-01 | 9.04E-01 |
| FAM170B  | 0.010046 | 8.20E-01 | 8.52E-01 |
| FAM171A1 | -0.13908 | 1.56E-03 | 3.03E-03 |
| FAM171A2 | 0.308968 | 7.46E-13 | 4.44E-12 |
| FAM171B  | 0.241237 | 2.97E-08 | 1.07E-07 |
| FAM172A  | -0.23672 | 5.43E-08 | 1.90E-07 |
| FAM173A  | -0.21027 | 1.48E-06 | 4.38E-06 |
| FAM173B  | 0.062068 | 1.60E-01 | 2.09E-01 |
| FAM174A  | -0.29619 | 6.90E-12 | 3.70E-11 |
| FAM174B  | -0.32275 | 5.98E-14 | 3.96E-13 |
| FAM175A  | -0.12034 | 6.25E-03 | 1.10E-02 |
| FAM175B  | 0.195176 | 8.14E-06 | 2.20E-05 |
| FAM176A  | -0.14925 | 6.79E-04 | 1.40E-03 |
| FAM176B  | 0.069586 | 1.15E-01 | 1.56E-01 |
| FAM177A1 | -0.17364 | 7.46E-05 | 1.77E-04 |
| FAM177B  | -0.02586 | 5.58E-01 | 6.19E-01 |
| FAM178A  | -0.08691 | 4.87E-02 | 7.20E-02 |
| FAM178B  | 0.006141 | 8.89E-01 | 9.10E-01 |
| FAM179A  | -0.31125 | 4.96E-13 | 3.01E-12 |
| FAM179B  | -0.19843 | 5.69E-06 | 1.58E-05 |
| FAM180A  | -0.29649 | 6.55E-12 | 3.52E-11 |
| FAM180B  | -0.19089 | 1.29E-05 | 3.41E-05 |
| FAM181A  | -0.23346 | 8.35E-08 | 2.87E-07 |
| FAM181B  | -0.03328 | 4.51E-01 | 5.17E-01 |
| FAM182A  | -0.30964 | 6.61E-13 | 3.96E-12 |
| FAM182B  | -0.35272 | 1.56E-16 | 1.32E-15 |
| FAM183A  | -0.25902 | 2.43E-09 | 9.94E-09 |
| FAM183B  | -0.33236 | 9.53E-15 | 6.78E-14 |
| FAM184A  | -0.40182 | 2.10E-21 | 2.76E-20 |
| FAM184B  | -0.18445 | 2.53E-05 | 6.41E-05 |
| FAM185A  | -0.0746  | 9.08E-02 | 1.26E-01 |

|          |          |          |          |
|----------|----------|----------|----------|
| FAM186A  | -0.19598 | 7.46E-06 | 2.03E-05 |
| FAM186B  | -0.12973 | 3.18E-03 | 5.91E-03 |
| FAM187B  | -0.20446 | 2.89E-06 | 8.30E-06 |
| FAM188A  | -0.17826 | 4.74E-05 | 1.16E-04 |
| FAM188B  | -0.26724 | 7.16E-10 | 3.12E-09 |
| FAM189A1 | -0.11074 | 1.19E-02 | 2.00E-02 |
| FAM189A2 | -0.52296 | 1.72E-37 | 6.72E-36 |
| FAM189B  | 0.294798 | 8.73E-12 | 4.63E-11 |
| FAM18A   | -0.26504 | 9.98E-10 | 4.27E-09 |
| FAM18B2  | -0.06928 | 1.16E-01 | 1.58E-01 |
| FAM18B   | 0.059927 | 1.75E-01 | 2.26E-01 |
| FAM190A  | -0.0785  | 7.51E-02 | 1.07E-01 |
| FAM190B  | -0.17629 | 5.76E-05 | 1.39E-04 |
| FAM192A  | -0.02975 | 5.01E-01 | 5.65E-01 |
| FAM193A  | -0.16918 | 1.14E-04 | 2.64E-04 |
| FAM193B  | -0.29389 | 1.02E-11 | 5.36E-11 |
| FAM194A  | 0.089421 | 4.25E-02 | 6.36E-02 |
| FAM194B  | -0.02321 | 5.99E-01 | 6.57E-01 |
| FAM195A  | -0.04597 | 2.98E-01 | 3.61E-01 |
| FAM195B  | 0.012624 | 7.75E-01 | 8.13E-01 |
| FAM196A  | 0.048221 | 2.75E-01 | 3.37E-01 |
| FAM196B  | 0.156767 | 3.56E-04 | 7.65E-04 |
| FAM197Y2 | 0.090607 | 3.98E-02 | 6.00E-02 |
| FAM198A  | -0.28936 | 2.17E-11 | 1.10E-10 |
| FAM198B  | 0.046928 | 2.88E-01 | 3.50E-01 |
| FAM199X  | 0.338303 | 2.96E-15 | 2.20E-14 |
| FAM19A1  | -0.14405 | 1.05E-03 | 2.09E-03 |
| FAM19A2  | -0.20222 | 3.73E-06 | 1.06E-05 |
| FAM19A3  | 0.124988 | 4.50E-03 | 8.14E-03 |
| FAM19A4  | 0.128148 | 3.58E-03 | 6.58E-03 |
| FAM19A5  | -0.158   | 3.19E-04 | 6.90E-04 |
| FAM200A  | 0.019706 | 6.55E-01 | 7.08E-01 |
| FAM200B  | -0.11776 | 7.47E-03 | 1.30E-02 |
| FAM20A   | -0.30166 | 2.70E-12 | 1.52E-11 |
| FAM20B   | 0.176375 | 5.71E-05 | 1.38E-04 |
| FAM20C   | -0.01398 | 7.52E-01 | 7.93E-01 |
| FAM21A   | -0.05696 | 1.97E-01 | 2.51E-01 |
| FAM21B   | -0.16997 | 1.06E-04 | 2.47E-04 |
| FAM21C   | -0.19546 | 7.90E-06 | 2.14E-05 |
| FAM22A   | -0.4186  | 2.89E-23 | 4.43E-22 |
| FAM22D   | -0.34928 | 3.20E-16 | 2.63E-15 |
| FAM22F   | -0.16766 | 1.32E-04 | 3.02E-04 |
| FAM22G   | -0.06751 | 1.26E-01 | 1.69E-01 |
| FAM23A   | -0.18382 | 2.70E-05 | 6.81E-05 |

|          |          |          |          |
|----------|----------|----------|----------|
| FAM24B   | 0.30715  | 1.03E-12 | 6.04E-12 |
| FAM25A   | 0.214824 | 8.62E-07 | 2.63E-06 |
| FAM25B   | 0.126798 | 3.95E-03 | 7.21E-03 |
| FAM26D   | 0.107159 | 1.50E-02 | 2.46E-02 |
| FAM26E   | 0.095435 | 3.04E-02 | 4.68E-02 |
| FAM26F   | 0.25115  | 7.54E-09 | 2.92E-08 |
| FAM27A   | -0.13727 | 1.79E-03 | 3.46E-03 |
| FAM27B   | -0.06731 | 1.27E-01 | 1.71E-01 |
| FAM27C   | -0.11022 | 1.23E-02 | 2.06E-02 |
| FAM27L   | 0.070564 | 1.10E-01 | 1.50E-01 |
| FAM32A   | 0.105793 | 1.63E-02 | 2.66E-02 |
| FAM35A   | 0.01524  | 7.30E-01 | 7.75E-01 |
| FAM35B2  | -0.00052 | 9.91E-01 | 9.93E-01 |
| FAM35B   | 0.011813 | 7.89E-01 | 8.25E-01 |
| FAM36A   | -0.08418 | 5.63E-02 | 8.21E-02 |
| FAM38A   | -0.02068 | 6.40E-01 | 6.94E-01 |
| FAM38B   | -0.26971 | 4.93E-10 | 2.19E-09 |
| FAM3A    | -0.07574 | 8.60E-02 | 1.20E-01 |
| FAM3B    | -0.13316 | 2.46E-03 | 4.64E-03 |
| FAM3C    | 0.24329  | 2.25E-08 | 8.22E-08 |
| FAM3D    | -0.287   | 3.20E-11 | 1.59E-10 |
| FAM40A   | -0.08621 | 5.05E-02 | 7.45E-02 |
| FAM40B   | 0.429971 | 1.38E-24 | 2.35E-23 |
| FAM41AY1 | -0.00659 | 8.81E-01 | 9.04E-01 |
| FAM41C   | -0.21434 | 9.13E-07 | 2.77E-06 |
| FAM43A   | -0.04168 | 3.45E-01 | 4.11E-01 |
| FAM43B   | -0.09375 | 3.34E-02 | 5.11E-02 |
| FAM45A   | 0.140767 | 1.36E-03 | 2.68E-03 |
| FAM45B   | 0.14855  | 7.20E-04 | 1.48E-03 |
| FAM46A   | -0.29333 | 1.12E-11 | 5.86E-11 |
| FAM46B   | -0.1506  | 6.06E-04 | 1.26E-03 |
| FAM46C   | -0.32883 | 1.88E-14 | 1.30E-13 |
| FAM46D   | 0.139085 | 1.56E-03 | 3.03E-03 |
| FAM47A   | 0.084136 | 5.64E-02 | 8.23E-02 |
| FAM47B   | 0.01697  | 7.01E-01 | 7.49E-01 |
| FAM47C   | -0.23034 | 1.25E-07 | 4.23E-07 |
| FAM47E   | -0.29571 | 7.48E-12 | 3.99E-11 |
| FAM48A   | -0.15632 | 3.70E-04 | 7.93E-04 |
| FAM48B1  | -0.01088 | 8.05E-01 | 8.39E-01 |
| FAM48B2  | 0.059201 | 1.80E-01 | 2.32E-01 |
| FAM49A   | -0.1058  | 1.63E-02 | 2.66E-02 |
| FAM49B   | 0.337361 | 3.57E-15 | 2.64E-14 |
| FAM50A   | 0.157647 | 3.29E-04 | 7.11E-04 |
| FAM50B   | -0.11482 | 9.11E-03 | 1.56E-02 |

|         |          |           |           |
|---------|----------|-----------|-----------|
| FAM53A  | -0.186   | 2.16E-05  | 5.52E-05  |
| FAM53B  | -0.26135 | 1.73E-09  | 7.19E-09  |
| FAM53C  | 0.035758 | 4.18E-01  | 4.84E-01  |
| FAM54A  | 0.804434 | 4.06E-118 | 9.23E-116 |
| FAM54B  | -0.27984 | 1.01E-10  | 4.82E-10  |
| FAM55A  | -0.04738 | 2.83E-01  | 3.45E-01  |
| FAM55B  | 0.061212 | 1.65E-01  | 2.16E-01  |
| FAM55C  | 0.121394 | 5.81E-03  | 1.03E-02  |
| FAM55D  | -0.18127 | 3.50E-05  | 8.70E-05  |
| FAM57A  | 0.065472 | 1.38E-01  | 1.84E-01  |
| FAM57B  | 0.31874  | 1.26E-13  | 8.10E-13  |
| FAM58A  | 0.168993 | 1.16E-04  | 2.69E-04  |
| FAM58B  | 0.083287 | 5.89E-02  | 8.57E-02  |
| FAM59A  | -0.14395 | 1.05E-03  | 2.11E-03  |
| FAM5B   | 0.019098 | 6.65E-01  | 7.17E-01  |
| FAM5C   | -0.25216 | 6.54E-09  | 2.55E-08  |
| FAM60A  | 0.398157 | 5.19E-21  | 6.63E-20  |
| FAM63A  | -0.33878 | 2.69E-15  | 2.01E-14  |
| FAM63B  | -0.00725 | 8.70E-01  | 8.94E-01  |
| FAM64A  | 0.828646 | 2.28E-131 | 6.81E-129 |
| FAM65A  | -0.10178 | 2.09E-02  | 3.33E-02  |
| FAM65B  | -0.33877 | 2.70E-15  | 2.02E-14  |
| FAM65C  | 0.232032 | 1.01E-07  | 3.43E-07  |
| FAM66A  | -0.26221 | 1.52E-09  | 6.37E-09  |
| FAM66C  | -0.03674 | 4.05E-01  | 4.72E-01  |
| FAM66D  | -0.21002 | 1.52E-06  | 4.51E-06  |
| FAM66E  | -0.09162 | 3.77E-02  | 5.70E-02  |
| FAM69A  | 0.103993 | 1.82E-02  | 2.95E-02  |
| FAM69B  | -0.08473 | 5.47E-02  | 8.00E-02  |
| FAM69C  | -0.01482 | 7.37E-01  | 7.81E-01  |
| FAM70A  | -0.06276 | 1.55E-01  | 2.04E-01  |
| FAM70B  | -0.05369 | 2.24E-01  | 2.82E-01  |
| FAM71A  | -0.10929 | 1.31E-02  | 2.17E-02  |
| FAM71B  | -0.02665 | 5.46E-01  | 6.08E-01  |
| FAM71C  | 0.008139 | 8.54E-01  | 8.81E-01  |
| FAM71D  | 0.260431 | 1.98E-09  | 8.17E-09  |
| FAM71E1 | -0.1162  | 8.30E-03  | 1.43E-02  |
| FAM71E2 | 0.143147 | 1.12E-03  | 2.24E-03  |
| FAM71F1 | 0.108355 | 1.39E-02  | 2.30E-02  |
| FAM71F2 | -0.09015 | 4.09E-02  | 6.14E-02  |
| FAM72A  | 0.773697 | 9.40E-104 | 1.59E-101 |
| FAM72B  | 0.820523 | 1.06E-126 | 2.79E-124 |
| FAM72D  | 0.800418 | 4.24E-116 | 9.31E-114 |
| FAM73A  | 0.088362 | 4.50E-02  | 6.71E-02  |

|         |          |          |          |
|---------|----------|----------|----------|
| FAM73B  | -0.17095 | 9.67E-05 | 2.26E-04 |
| FAM74A1 | -0.16333 | 1.97E-04 | 4.41E-04 |
| FAM74A3 | -0.15206 | 5.35E-04 | 1.12E-03 |
| FAM74A4 | -0.17507 | 6.49E-05 | 1.55E-04 |
| FAM75A2 | 0.104338 | 1.79E-02 | 2.89E-02 |
| FAM75A3 | 0.100477 | 2.26E-02 | 3.58E-02 |
| FAM75A5 | 0.113243 | 1.01E-02 | 1.71E-02 |
| FAM75A6 | 0.031678 | 4.73E-01 | 5.39E-01 |
| FAM75C1 | 0.018118 | 6.82E-01 | 7.32E-01 |
| FAM76A  | -0.27264 | 3.14E-10 | 1.43E-09 |
| FAM76B  | 0.038938 | 3.78E-01 | 4.44E-01 |
| FAM78A  | -0.15048 | 6.12E-04 | 1.27E-03 |
| FAM78B  | -0.13396 | 2.32E-03 | 4.38E-03 |
| FAM7A2  | 0.072369 | 1.01E-01 | 1.39E-01 |
| FAM7A3  | 0.134694 | 2.19E-03 | 4.16E-03 |
| FAM81A  | 0.198323 | 5.76E-06 | 1.59E-05 |
| FAM81B  | -0.30185 | 2.61E-12 | 1.47E-11 |
| FAM82A1 | -0.51338 | 5.69E-36 | 2.06E-34 |
| FAM82A2 | -0.25159 | 7.08E-09 | 2.75E-08 |
| FAM82B  | -0.13372 | 2.36E-03 | 4.46E-03 |
| FAM83A  | 0.270764 | 4.19E-10 | 1.88E-09 |
| FAM83B  | 0.219739 | 4.75E-07 | 1.50E-06 |
| FAM83C  | 0.173984 | 7.22E-05 | 1.72E-04 |
| FAM83D  | 0.731249 | 2.81E-87 | 3.83E-85 |
| FAM83E  | -0.38139 | 2.82E-19 | 3.07E-18 |
| FAM83F  | 0.263342 | 1.29E-09 | 5.43E-09 |
| FAM83G  | 0.176476 | 5.65E-05 | 1.37E-04 |
| FAM83H  | -0.03821 | 3.87E-01 | 4.53E-01 |
| FAM84A  | -0.05648 | 2.01E-01 | 2.56E-01 |
| FAM84B  | -0.07443 | 9.15E-02 | 1.27E-01 |
| FAM86A  | -0.07442 | 9.16E-02 | 1.27E-01 |
| FAM86B1 | -0.25821 | 2.74E-09 | 1.11E-08 |
| FAM86B2 | -0.16924 | 1.14E-04 | 2.63E-04 |
| FAM86C  | 0.063556 | 1.50E-01 | 1.97E-01 |
| FAM86D  | -0.08602 | 5.10E-02 | 7.51E-02 |
| FAM89A  | 0.02904  | 5.11E-01 | 5.75E-01 |
| FAM89B  | -0.03381 | 4.44E-01 | 5.10E-01 |
| FAM8A1  | -0.37396 | 1.54E-18 | 1.58E-17 |
| FAM90A1 | 0.07579  | 8.58E-02 | 1.20E-01 |
| FAM90A7 | -0.00427 | 9.23E-01 | 9.38E-01 |
| FAM91A1 | 0.333967 | 6.96E-15 | 5.03E-14 |
| FAM92A1 | 0.190642 | 1.33E-05 | 3.49E-05 |
| FAM92A3 | 0.079812 | 7.03E-02 | 1.01E-01 |
| FAM92B  | -0.23407 | 7.71E-08 | 2.66E-07 |

|         |          |           |           |
|---------|----------|-----------|-----------|
| FAM95B1 | -0.27208 | 3.42E-10  | 1.55E-09  |
| FAM96A  | 0.260918 | 1.84E-09  | 7.64E-09  |
| FAM96B  | 0.035164 | 4.26E-01  | 4.92E-01  |
| FAM98A  | 0.392896 | 1.86E-20  | 2.26E-19  |
| FAM98B  | 0.203442 | 3.25E-06  | 9.27E-06  |
| FAM98C  | -0.15029 | 6.22E-04  | 1.29E-03  |
| FAM99A  | 0.012253 | 7.81E-01  | 8.19E-01  |
| FAM99B  | 0.012441 | 7.78E-01  | 8.16E-01  |
| FAM9A   | 0.125821 | 4.24E-03  | 7.70E-03  |
| FAM9B   | 0.133428 | 2.41E-03  | 4.55E-03  |
| FAM9C   | 0.094889 | 3.13E-02  | 4.81E-02  |
| FANCA   | 0.585866 | 8.76E-49  | 5.78E-47  |
| FANCB   | 0.745658 | 1.68E-92  | 2.42E-90  |
| FANCC   | 0.35665  | 6.82E-17  | 6.00E-16  |
| FANCD2  | 0.69054  | 3.43E-74  | 3.85E-72  |
| FANCE   | 0.174708 | 6.73E-05  | 1.61E-04  |
| FANCF   | 0.179949 | 4.00E-05  | 9.86E-05  |
| FANCG   | 0.636268 | 8.63E-60  | 7.34E-58  |
| FANCI   | 0.823758 | 1.57E-128 | 4.30E-126 |
| FANCL   | 0.412037 | 1.59E-22  | 2.29E-21  |
| FANCM   | 0.481234 | 3.29E-31  | 9.11E-30  |
| FANK1   | -0.37643 | 8.80E-19  | 9.18E-18  |
| FAP     | 0.227344 | 1.84E-07  | 6.09E-07  |
| FAR1    | 0.100041 | 2.32E-02  | 3.66E-02  |
| FAR2    | 0.047751 | 2.79E-01  | 3.41E-01  |
| FARP1   | -0.15757 | 3.31E-04  | 7.15E-04  |
| FARP2   | -0.20655 | 2.28E-06  | 6.60E-06  |
| FARS2   | -0.16838 | 1.23E-04  | 2.84E-04  |
| FARSA   | 0.230495 | 1.23E-07  | 4.15E-07  |
| FARSB   | 0.538399 | 4.80E-40  | 2.25E-38  |
| FASLG   | 0.12207  | 5.54E-03  | 9.87E-03  |
| FASN    | -0.05789 | 1.90E-01  | 2.43E-01  |
| FASTKD1 | 0.301278 | 2.88E-12  | 1.62E-11  |
| FASTKD2 | 0.207412 | 2.06E-06  | 6.01E-06  |
| FASTKD3 | 0.095256 | 3.07E-02  | 4.73E-02  |
| FASTKD5 | -0.15035 | 6.19E-04  | 1.28E-03  |
| FASTK   | 0.030203 | 4.94E-01  | 5.59E-01  |
| FAS     | -0.05796 | 1.89E-01  | 2.43E-01  |
| FAT1    | 0.089078 | 4.33E-02  | 6.47E-02  |
| FAT2    | 0.002277 | 9.59E-01  | 9.68E-01  |
| FAT3    | -0.20227 | 3.71E-06  | 1.05E-05  |
| FAT4    | -0.40377 | 1.29E-21  | 1.72E-20  |
| FATE1   | 0.259471 | 2.28E-09  | 9.33E-09  |
| FAU     | 0.023724 | 5.91E-01  | 6.49E-01  |

|          |          |          |          |
|----------|----------|----------|----------|
| FBF1     | -0.00513 | 9.08E-01 | 9.26E-01 |
| FBLIM1   | 0.016044 | 7.16E-01 | 7.63E-01 |
| FBLL1    | 0.055034 | 2.12E-01 | 2.69E-01 |
| FBLN1    | -0.15404 | 4.51E-04 | 9.53E-04 |
| FBLN2    | -0.06152 | 1.63E-01 | 2.13E-01 |
| FBLN5    | -0.48783 | 3.80E-32 | 1.12E-30 |
| FBLN7    | 0.243703 | 2.12E-08 | 7.78E-08 |
| FBL      | 0.37655  | 8.56E-19 | 8.95E-18 |
| FBN1     | -0.00986 | 8.23E-01 | 8.54E-01 |
| FBN2     | 0.220903 | 4.11E-07 | 1.31E-06 |
| FBN3     | -0.06163 | 1.63E-01 | 2.12E-01 |
| FBP1     | -0.44222 | 4.53E-26 | 8.77E-25 |
| FBP2     | -0.16842 | 1.23E-04 | 2.83E-04 |
| FBRSL1   | 0.00206  | 9.63E-01 | 9.71E-01 |
| FBRS     | -0.15873 | 2.99E-04 | 6.50E-04 |
| FBXL12   | -0.11636 | 8.21E-03 | 1.41E-02 |
| FBXL13   | 0.127642 | 3.71E-03 | 6.81E-03 |
| FBXL14   | 0.107891 | 1.43E-02 | 2.36E-02 |
| FBXL15   | -0.26941 | 5.15E-10 | 2.28E-09 |
| FBXL16   | -0.22293 | 3.20E-07 | 1.03E-06 |
| FBXL17   | -0.23904 | 3.99E-08 | 1.42E-07 |
| FBXL18   | 0.143272 | 1.11E-03 | 2.22E-03 |
| FBXL19   | 0.13981  | 1.47E-03 | 2.88E-03 |
| FBXL20   | 0.067689 | 1.25E-01 | 1.68E-01 |
| FBXL21   | 0.194931 | 8.36E-06 | 2.26E-05 |
| FBXL22   | -0.11459 | 9.25E-03 | 1.58E-02 |
| FBXL2    | -0.05205 | 2.38E-01 | 2.98E-01 |
| FBXL3    | -0.25527 | 4.19E-09 | 1.67E-08 |
| FBXL4    | 0.13242  | 2.60E-03 | 4.89E-03 |
| FBXL5    | -0.15088 | 5.92E-04 | 1.23E-03 |
| FBXL6    | -0.07655 | 8.26E-02 | 1.16E-01 |
| FBXL7    | -0.21303 | 1.07E-06 | 3.22E-06 |
| FBXL8    | -0.41955 | 2.25E-23 | 3.49E-22 |
| FBXO10   | 0.141504 | 1.28E-03 | 2.54E-03 |
| FBXO11   | 0.099522 | 2.39E-02 | 3.77E-02 |
| FBXO15   | -0.2925  | 1.29E-11 | 6.69E-11 |
| FBXO16   | -0.08273 | 6.07E-02 | 8.80E-02 |
| FBXO17   | 0.113859 | 9.71E-03 | 1.65E-02 |
| FBXO18   | 0.006945 | 8.75E-01 | 8.99E-01 |
| FBXO21   | 0.042781 | 3.33E-01 | 3.98E-01 |
| FBXO22OS | 0.287933 | 2.74E-11 | 1.38E-10 |
| FBXO22   | 0.189379 | 1.52E-05 | 3.96E-05 |
| FBXO24   | -0.21127 | 1.31E-06 | 3.92E-06 |
| FBXO25   | -0.28151 | 7.77E-11 | 3.73E-10 |

|        |          |          |          |
|--------|----------|----------|----------|
| FBXO27 | 0.050768 | 2.50E-01 | 3.11E-01 |
| FBXO28 | 0.073343 | 9.64E-02 | 1.33E-01 |
| FBXO2  | -0.22693 | 1.93E-07 | 6.40E-07 |
| FBXO30 | 0.354533 | 1.07E-16 | 9.20E-16 |
| FBXO31 | -0.35938 | 3.81E-17 | 3.46E-16 |
| FBXO32 | 0.306884 | 1.08E-12 | 6.31E-12 |
| FBXO33 | 0.002871 | 9.48E-01 | 9.59E-01 |
| FBXO34 | -0.2153  | 8.14E-07 | 2.50E-06 |
| FBXO36 | -0.0172  | 6.97E-01 | 7.46E-01 |
| FBXO38 | -0.41137 | 1.89E-22 | 2.69E-21 |
| FBXO39 | 0.03838  | 3.85E-01 | 4.51E-01 |
| FBXO3  | -0.26377 | 1.21E-09 | 5.11E-09 |
| FBXO40 | -0.01323 | 7.64E-01 | 8.04E-01 |
| FBXO41 | 0.191525 | 1.21E-05 | 3.19E-05 |
| FBXO42 | -0.1563  | 3.70E-04 | 7.94E-04 |
| FBXO43 | 0.552626 | 1.61E-42 | 8.47E-41 |
| FBXO44 | -0.28562 | 4.00E-11 | 1.97E-10 |
| FBXO45 | 0.63783  | 3.64E-60 | 3.17E-58 |
| FBXO46 | 0.040311 | 3.61E-01 | 4.27E-01 |
| FBXO47 | 0.16145  | 2.34E-04 | 5.18E-04 |
| FBXO48 | 0.116066 | 8.38E-03 | 1.44E-02 |
| FBXO4  | -0.06671 | 1.31E-01 | 1.75E-01 |
| FBXO5  | 0.736903 | 2.76E-89 | 3.83E-87 |
| FBXO6  | 0.064316 | 1.45E-01 | 1.92E-01 |
| FBXO7  | -0.17575 | 6.08E-05 | 1.46E-04 |
| FBXO8  | -0.18389 | 2.68E-05 | 6.77E-05 |
| FBXO9  | -0.16914 | 1.15E-04 | 2.65E-04 |
| FBXW10 | -0.03483 | 4.30E-01 | 4.97E-01 |
| FBXW11 | -0.21004 | 1.52E-06 | 4.50E-06 |
| FBXW12 | 0.081908 | 6.33E-02 | 9.15E-02 |
| FBXW2  | -0.15588 | 3.84E-04 | 8.22E-04 |
| FBXW4  | -0.55741 | 2.24E-43 | 1.22E-41 |
| FBXW5  | -0.05935 | 1.79E-01 | 2.31E-01 |
| FBXW7  | -0.04107 | 3.52E-01 | 4.18E-01 |
| FBXW8  | 0.045138 | 3.07E-01 | 3.71E-01 |
| FBXW9  | -0.04765 | 2.80E-01 | 3.42E-01 |
| FCAMR  | -0.32909 | 1.79E-14 | 1.24E-13 |
| FCAR   | 0.119959 | 6.42E-03 | 1.13E-02 |
| FCER1A | -0.48644 | 6.02E-32 | 1.74E-30 |
| FCER1G | 0.102321 | 2.02E-02 | 3.23E-02 |
| FCER2  | -0.28387 | 5.32E-11 | 2.59E-10 |
| FCF1   | 0.139442 | 1.51E-03 | 2.95E-03 |
| FCGBP  | -0.40745 | 5.12E-22 | 7.05E-21 |
| FCGR1A | 0.118244 | 7.22E-03 | 1.26E-02 |



|         |          |           |           |
|---------|----------|-----------|-----------|
| FCGR1B  | 0.118462 | 7.12E-03  | 1.24E-02  |
| FCGR1C  | 0.105062 | 1.71E-02  | 2.77E-02  |
| FCGR2A  | -0.052   | 2.39E-01  | 2.98E-01  |
| FCGR2B  | 0.024126 | 5.85E-01  | 6.44E-01  |
| FCGR2C  | 0.006903 | 8.76E-01  | 8.99E-01  |
| FCGR3A  | 0.172662 | 8.20E-05  | 1.93E-04  |
| FCGR3B  | 0.089206 | 4.30E-02  | 6.43E-02  |
| FCGRT   | -0.51142 | 1.15E-35  | 4.11E-34  |
| FCHO1   | 0.091227 | 3.85E-02  | 5.81E-02  |
| FCHO2   | -0.34401 | 9.40E-16  | 7.38E-15  |
| FCHSD1  | -0.18124 | 3.51E-05  | 8.72E-05  |
| FCHSD2  | -0.26562 | 9.15E-10  | 3.93E-09  |
| FCN1    | -0.19844 | 5.69E-06  | 1.57E-05  |
| FCN2    | -0.02919 | 5.09E-01  | 5.72E-01  |
| FCN3    | -0.18765 | 1.82E-05  | 4.70E-05  |
| FCRL1   | -0.24322 | 2.27E-08  | 8.29E-08  |
| FCRL2   | -0.09619 | 2.91E-02  | 4.50E-02  |
| FCRL3   | -0.1255  | 4.34E-03  | 7.87E-03  |
| FCRL4   | -0.02583 | 5.59E-01  | 6.20E-01  |
| FCRL5   | 0.006192 | 8.89E-01  | 9.10E-01  |
| FCRL6   | -0.16807 | 1.27E-04  | 2.92E-04  |
| FCRLA   | -0.11687 | 7.93E-03  | 1.37E-02  |
| FCRLB   | 0.120103 | 6.36E-03  | 1.12E-02  |
| FDFT1   | -0.09003 | 4.11E-02  | 6.17E-02  |
| FDPSL2A | -0.06032 | 1.72E-01  | 2.23E-01  |
| FDPS    | 0.260511 | 1.96E-09  | 8.08E-09  |
| FDX1L   | -0.07146 | 1.05E-01  | 1.44E-01  |
| FDX1    | -0.08262 | 6.10E-02  | 8.84E-02  |
| FDXACB1 | -0.09243 | 3.60E-02  | 5.47E-02  |
| FDXR    | -0.16167 | 2.29E-04  | 5.08E-04  |
| FECH    | 0.06856  | 1.20E-01  | 1.62E-01  |
| FEM1A   | -0.16231 | 2.17E-04  | 4.81E-04  |
| FEM1B   | 0.076101 | 8.45E-02  | 1.18E-01  |
| FEM1C   | -0.28468 | 4.66E-11  | 2.28E-10  |
| FEN1    | 0.770883 | 1.49E-102 | 2.49E-100 |
| FER1L4  | 0.224134 | 2.75E-07  | 8.96E-07  |
| FER1L5  | -0.20763 | 2.01E-06  | 5.87E-06  |
| FER1L6  | 0.021083 | 6.33E-01  | 6.88E-01  |
| FERD3L  | 0.029371 | 5.06E-01  | 5.70E-01  |
| FERMT1  | 0.072455 | 1.01E-01  | 1.38E-01  |
| FERMT2  | 0.014241 | 7.47E-01  | 7.90E-01  |
| FERMT3  | -0.04964 | 2.61E-01  | 3.22E-01  |
| FER     | 0.108062 | 1.41E-02  | 2.34E-02  |
| FES     | -0.21481 | 8.63E-07  | 2.64E-06  |

|          |          |          |          |
|----------|----------|----------|----------|
| FETUB    | 0.16054  | 2.54E-04 | 5.58E-04 |
| FEV      | 0.13285  | 2.52E-03 | 4.74E-03 |
| FEZ1     | -0.24149 | 2.87E-08 | 1.04E-07 |
| FEZ2     | 0.103518 | 1.88E-02 | 3.02E-02 |
| FEZF1    | -0.15968 | 2.75E-04 | 6.01E-04 |
| FEZF2    | 0.041675 | 3.45E-01 | 4.11E-01 |
| FFAR1    | -0.07016 | 1.12E-01 | 1.52E-01 |
| FFAR2    | 0.152538 | 5.14E-04 | 1.08E-03 |
| FFAR3    | 0.131195 | 2.85E-03 | 5.33E-03 |
| FGA      | 0.113718 | 9.80E-03 | 1.67E-02 |
| FGB      | 0.221974 | 3.60E-07 | 1.16E-06 |
| FGD1     | 0.301874 | 2.60E-12 | 1.46E-11 |
| FGD2     | -0.19815 | 5.87E-06 | 1.62E-05 |
| FGD3     | -0.24231 | 2.56E-08 | 9.32E-08 |
| FGD4     | -0.19718 | 6.54E-06 | 1.79E-05 |
| FGD5     | -0.27509 | 2.14E-10 | 9.90E-10 |
| FGD6     | -0.0597  | 1.76E-01 | 2.28E-01 |
| FGF10    | -0.23534 | 6.52E-08 | 2.27E-07 |
| FGF11    | 0.214745 | 8.70E-07 | 2.65E-06 |
| FGF12    | 0.274673 | 2.29E-10 | 1.05E-09 |
| FGF13    | -0.11717 | 7.77E-03 | 1.34E-02 |
| FGF14    | -0.47142 | 7.45E-30 | 1.89E-28 |
| FGF16    | 0.030514 | 4.90E-01 | 5.54E-01 |
| FGF17    | -0.14641 | 8.60E-04 | 1.75E-03 |
| FGF18    | -0.23455 | 7.24E-08 | 2.51E-07 |
| FGF19    | 0.099661 | 2.37E-02 | 3.74E-02 |
| FGF1     | -0.13346 | 2.41E-03 | 4.54E-03 |
| FGF20    | -0.03746 | 3.96E-01 | 4.63E-01 |
| FGF21    | 0.235282 | 6.57E-08 | 2.29E-07 |
| FGF22    | -0.18549 | 2.28E-05 | 5.80E-05 |
| FGF23    | 0.163    | 2.03E-04 | 4.54E-04 |
| FGF2     | -0.14337 | 1.10E-03 | 2.20E-03 |
| FGF3     | 0.048357 | 2.73E-01 | 3.35E-01 |
| FGF4     | 0.0416   | 3.46E-01 | 4.12E-01 |
| FGF5     | 0.360483 | 3.00E-17 | 2.75E-16 |
| FGF7     | -0.14743 | 7.91E-04 | 1.61E-03 |
| FGF8     | 0.083954 | 5.69E-02 | 8.30E-02 |
| FGF9     | -0.28573 | 3.93E-11 | 1.94E-10 |
| FGFBP1   | 0.114689 | 9.19E-03 | 1.57E-02 |
| FGFBP2   | -0.24746 | 1.26E-08 | 4.76E-08 |
| FGFBP3   | -0.09003 | 4.11E-02 | 6.17E-02 |
| FGFR1OP2 | 0.313113 | 3.54E-13 | 2.18E-12 |
| FGFR1OP  | 0.387889 | 6.15E-20 | 7.15E-19 |
| FGFR1    | -0.0442  | 3.17E-01 | 3.81E-01 |

|          |          |          |          |
|----------|----------|----------|----------|
| FGFR2    | -0.4456  | 1.73E-26 | 3.42E-25 |
| FGFR3    | -0.40551 | 8.35E-22 | 1.13E-20 |
| FGFR4    | -0.17207 | 8.68E-05 | 2.04E-04 |
| FGFRL1   | -0.10685 | 1.53E-02 | 2.51E-02 |
| FGGY     | -0.32822 | 2.12E-14 | 1.46E-13 |
| FGG      | 0.069439 | 1.16E-01 | 1.57E-01 |
| FGL1     | 0.081003 | 6.62E-02 | 9.54E-02 |
| FGL2     | -0.11477 | 9.14E-03 | 1.56E-02 |
| FGR      | -0.13813 | 1.68E-03 | 3.25E-03 |
| FHAD1    | -0.13695 | 1.84E-03 | 3.55E-03 |
| FHDC1    | -0.24869 | 1.06E-08 | 4.04E-08 |
| FHIT     | -0.34168 | 1.51E-15 | 1.16E-14 |
| FHL1     | -0.44251 | 4.18E-26 | 8.10E-25 |
| FHL2     | 0.219861 | 4.68E-07 | 1.48E-06 |
| FHL3     | 0.101535 | 2.12E-02 | 3.37E-02 |
| FHL5     | -0.41923 | 2.45E-23 | 3.78E-22 |
| FHOD1    | -0.31746 | 1.60E-13 | 1.02E-12 |
| FHOD3    | 0.190695 | 1.32E-05 | 3.47E-05 |
| FH       | 0.195256 | 8.07E-06 | 2.19E-05 |
| FIBCD1   | 0.103268 | 1.91E-02 | 3.07E-02 |
| FIBIN    | -0.10649 | 1.56E-02 | 2.56E-02 |
| FIBP     | 0.23903  | 4.00E-08 | 1.42E-07 |
| FICD     | -0.06164 | 1.63E-01 | 2.12E-01 |
| FIG4     | -0.10255 | 1.99E-02 | 3.19E-02 |
| FIGF     | -0.5203  | 4.58E-37 | 1.76E-35 |
| FIGLA    | -0.14448 | 1.01E-03 | 2.03E-03 |
| FIGNL1   | 0.530566 | 9.85E-39 | 4.22E-37 |
| FIGNL2   | -0.14584 | 9.02E-04 | 1.82E-03 |
| FIGN     | 0.279706 | 1.04E-10 | 4.92E-10 |
| FILIP1L  | -0.18096 | 3.61E-05 | 8.96E-05 |
| FILIP1   | -0.30974 | 6.50E-13 | 3.89E-12 |
| FIP1L1   | 0.349343 | 3.15E-16 | 2.60E-15 |
| FIS1     | -0.05434 | 2.18E-01 | 2.75E-01 |
| FITM1    | -0.29213 | 1.37E-11 | 7.10E-11 |
| FITM2    | -0.06688 | 1.30E-01 | 1.74E-01 |
| FIZ1     | -0.11202 | 1.10E-02 | 1.85E-02 |
| FJX1     | 0.268413 | 6.00E-10 | 2.64E-09 |
| FKBP10   | 0.324397 | 4.39E-14 | 2.94E-13 |
| FKBP11   | -0.04872 | 2.70E-01 | 3.32E-01 |
| FKBP14   | 0.241838 | 2.74E-08 | 9.92E-08 |
| FKBP15   | -0.11748 | 7.61E-03 | 1.32E-02 |
| FKBP1AP1 | 0.003095 | 9.44E-01 | 9.56E-01 |
| FKBP1A   | 0.108296 | 1.39E-02 | 2.31E-02 |
| FKBP1B   | 0.044419 | 3.14E-01 | 3.79E-01 |

|          |          |          |          |
|----------|----------|----------|----------|
| FKBP2    | -0.20806 | 1.91E-06 | 5.61E-06 |
| FKBP3    | 0.344016 | 9.40E-16 | 7.38E-15 |
| FKBP4    | 0.449045 | 6.38E-27 | 1.30E-25 |
| FKBP5    | 0.099112 | 2.45E-02 | 3.85E-02 |
| FKBP6    | -0.20611 | 2.40E-06 | 6.93E-06 |
| FKBP7    | -0.1398  | 1.47E-03 | 2.88E-03 |
| FKBP8    | -0.15294 | 4.96E-04 | 1.04E-03 |
| FKBP9L   | 0.195029 | 8.27E-06 | 2.24E-05 |
| FKBP9    | 0.142824 | 1.15E-03 | 2.29E-03 |
| FKBPL    | 0.19725  | 6.49E-06 | 1.78E-05 |
| FKRP     | -0.04132 | 3.49E-01 | 4.15E-01 |
| FKSG29   | -0.00644 | 8.84E-01 | 9.06E-01 |
| FKSG83   | -0.12368 | 4.94E-03 | 8.89E-03 |
| FKTN     | 0.155127 | 4.11E-04 | 8.73E-04 |
| FLAD1    | 0.314811 | 2.60E-13 | 1.62E-12 |
| FLCN     | -0.08636 | 5.02E-02 | 7.40E-02 |
| FLG2     | -0.07282 | 9.88E-02 | 1.36E-01 |
| FLG      | -0.03981 | 3.67E-01 | 4.34E-01 |
| FLI1     | -0.27479 | 2.25E-10 | 1.04E-09 |
| FLII     | -0.07782 | 7.77E-02 | 1.10E-01 |
| FLJ10038 | -0.38199 | 2.45E-19 | 2.71E-18 |
| FLJ10213 | -0.15878 | 2.97E-04 | 6.47E-04 |
| FLJ10357 | -0.25333 | 5.53E-09 | 2.18E-08 |
| FLJ10661 | -0.27419 | 2.47E-10 | 1.13E-09 |
| FLJ11235 | -0.39513 | 1.08E-20 | 1.35E-19 |
| FLJ12825 | -0.06527 | 1.39E-01 | 1.85E-01 |
| FLJ13197 | -0.33234 | 9.57E-15 | 6.80E-14 |
| FLJ13224 | 0.056787 | 1.98E-01 | 2.53E-01 |
| FLJ14107 | -0.11785 | 7.42E-03 | 1.29E-02 |
| FLJ16779 | 0.119791 | 6.50E-03 | 1.14E-02 |
| FLJ22536 | 0.295921 | 7.22E-12 | 3.87E-11 |
| FLJ23867 | -0.1905  | 1.35E-05 | 3.54E-05 |
| FLJ25363 | 0.218858 | 5.29E-07 | 1.66E-06 |
| FLJ25758 | 0.166077 | 1.53E-04 | 3.47E-04 |
| FLJ26850 | -0.20637 | 2.33E-06 | 6.73E-06 |
| FLJ30679 | 0.204972 | 2.73E-06 | 7.85E-06 |
| FLJ32063 | 0.106654 | 1.55E-02 | 2.53E-02 |
| FLJ33360 | -0.35576 | 8.23E-17 | 7.17E-16 |
| FLJ33630 | -0.23106 | 1.14E-07 | 3.87E-07 |
| FLJ34503 | -0.20661 | 2.26E-06 | 6.57E-06 |
| FLJ35024 | -0.12679 | 3.95E-03 | 7.21E-03 |
| FLJ35220 | -0.18981 | 1.45E-05 | 3.79E-05 |
| FLJ35390 | -0.11191 | 1.10E-02 | 1.86E-02 |
| FLJ35776 | -0.07308 | 9.76E-02 | 1.35E-01 |

|          |          |          |          |
|----------|----------|----------|----------|
| FLJ36000 | 0.169031 | 1.16E-04 | 2.68E-04 |
| FLJ36031 | 0.360061 | 3.29E-17 | 3.01E-16 |
| FLJ36777 | -0.35687 | 6.50E-17 | 5.74E-16 |
| FLJ37201 | 0.139531 | 1.50E-03 | 2.93E-03 |
| FLJ37307 | -0.14877 | 7.07E-04 | 1.45E-03 |
| FLJ37453 | -0.11002 | 1.25E-02 | 2.08E-02 |
| FLJ37543 | -0.11598 | 8.43E-03 | 1.45E-02 |
| FLJ39582 | 0.002901 | 9.48E-01 | 9.59E-01 |
| FLJ39609 | -0.17267 | 8.19E-05 | 1.93E-04 |
| FLJ39653 | -0.15557 | 3.95E-04 | 8.42E-04 |
| FLJ39739 | 0.15623  | 3.73E-04 | 7.99E-04 |
| FLJ40292 | 0.049062 | 2.66E-01 | 3.28E-01 |
| FLJ40330 | -0.03836 | 3.85E-01 | 4.51E-01 |
| FLJ40504 | 0.052858 | 2.31E-01 | 2.90E-01 |
| FLJ40852 | -0.2305  | 1.23E-07 | 4.15E-07 |
| FLJ41941 | 0.058709 | 1.83E-01 | 2.36E-01 |
| FLJ42289 | -0.27677 | 1.65E-10 | 7.70E-10 |
| FLJ42393 | -0.10263 | 1.98E-02 | 3.18E-02 |
| FLJ42627 | -0.17593 | 5.96E-05 | 1.44E-04 |
| FLJ42709 | -0.13221 | 2.64E-03 | 4.96E-03 |
| FLJ42875 | -0.57585 | 8.04E-47 | 5.05E-45 |
| FLJ43390 | -0.25097 | 7.73E-09 | 2.99E-08 |
| FLJ43663 | -0.25991 | 2.14E-09 | 8.78E-09 |
| FLJ43859 | 0.079949 | 6.99E-02 | 1.00E-01 |
| FLJ43860 | -0.0414  | 3.48E-01 | 4.14E-01 |
| FLJ43950 | 0.02136  | 6.29E-01 | 6.84E-01 |
| FLJ44054 | 0.106733 | 1.54E-02 | 2.52E-02 |
| FLJ44606 | -0.27882 | 1.19E-10 | 5.64E-10 |
| FLJ44635 | -0.11003 | 1.25E-02 | 2.08E-02 |
| FLJ45079 | -0.11084 | 1.18E-02 | 1.98E-02 |
| FLJ45244 | -0.33466 | 6.09E-15 | 4.41E-14 |
| FLJ45340 | -0.22085 | 4.14E-07 | 1.32E-06 |
| FLJ45445 | -0.05549 | 2.09E-01 | 2.65E-01 |
| FLJ45983 | 0.128295 | 3.54E-03 | 6.51E-03 |
| FLJ46111 | 0.110838 | 1.18E-02 | 1.98E-02 |
| FLJ46321 | 0.042899 | 3.31E-01 | 3.97E-01 |
| FLJ46361 | -0.07588 | 8.54E-02 | 1.20E-01 |
| FLJ90757 | -0.47709 | 1.24E-30 | 3.33E-29 |
| FLNA     | -0.12072 | 6.09E-03 | 1.08E-02 |
| FLNB     | -0.06631 | 1.33E-01 | 1.78E-01 |
| FLNC     | 0.204334 | 2.94E-06 | 8.41E-06 |
| FLOT1    | 0.012228 | 7.82E-01 | 8.19E-01 |
| FLOT2    | -0.18202 | 3.25E-05 | 8.09E-05 |
| FLRT1    | -0.02225 | 6.14E-01 | 6.71E-01 |

|         |          |          |          |
|---------|----------|----------|----------|
| FLRT2   | 0.064294 | 1.45E-01 | 1.92E-01 |
| FLRT3   | -0.3628  | 1.82E-17 | 1.70E-16 |
| FLT1    | 0.08941  | 4.25E-02 | 6.37E-02 |
| FLT3LG  | -0.16078 | 2.49E-04 | 5.47E-04 |
| FLT3    | -0.22002 | 4.59E-07 | 1.45E-06 |
| FLT4    | -0.20628 | 2.35E-06 | 6.80E-06 |
| FLVCR1  | 0.187057 | 1.93E-05 | 4.98E-05 |
| FLVCR2  | -0.00584 | 8.95E-01 | 9.15E-01 |
| FLYWCH1 | -0.3129  | 3.68E-13 | 2.26E-12 |
| FLYWCH2 | -0.15743 | 3.35E-04 | 7.24E-04 |
| FMN1    | -0.20164 | 3.98E-06 | 1.12E-05 |
| FMN2    | -0.09457 | 3.19E-02 | 4.89E-02 |
| FMNL1   | -0.03315 | 4.53E-01 | 5.19E-01 |
| FMNL2   | -0.19741 | 6.38E-06 | 1.75E-05 |
| FMNL3   | -0.09233 | 3.62E-02 | 5.49E-02 |
| FMO1    | 0.117805 | 7.45E-03 | 1.29E-02 |
| FMO2    | -0.38993 | 3.79E-20 | 4.48E-19 |
| FMO3    | -0.33183 | 1.06E-14 | 7.49E-14 |
| FMO4    | -0.36401 | 1.40E-17 | 1.31E-16 |
| FMO5    | -0.44972 | 5.24E-27 | 1.08E-25 |
| FMO6P   | -0.10007 | 2.31E-02 | 3.66E-02 |
| FMO9P   | 0.091885 | 3.71E-02 | 5.62E-02 |
| FMOD    | -0.19391 | 9.34E-06 | 2.51E-05 |
| FMR1NB  | 0.098865 | 2.49E-02 | 3.90E-02 |
| FMR1    | 0.088173 | 4.55E-02 | 6.77E-02 |
| FN1     | 0.178198 | 4.77E-05 | 1.16E-04 |
| FN3KRP  | 0.136438 | 1.91E-03 | 3.68E-03 |
| FN3K    | -0.22327 | 3.07E-07 | 9.92E-07 |
| FNBP1L  | -0.08004 | 6.95E-02 | 9.96E-02 |
| FNBP1   | -0.03405 | 4.41E-01 | 5.07E-01 |
| FNBP4   | -0.22162 | 3.76E-07 | 1.21E-06 |
| FNDC1   | 0.079257 | 7.23E-02 | 1.03E-01 |
| FNDC3A  | -0.19392 | 9.33E-06 | 2.51E-05 |
| FNDC3B  | 0.309234 | 7.11E-13 | 4.24E-12 |
| FNDC4   | 0.173499 | 7.56E-05 | 1.79E-04 |
| FNDC5   | -0.21629 | 7.22E-07 | 2.23E-06 |
| FNDC7   | 0.075831 | 8.56E-02 | 1.20E-01 |
| FNDC8   | 0.176711 | 5.52E-05 | 1.34E-04 |
| FNIP1   | -0.09508 | 3.10E-02 | 4.77E-02 |
| FNIP2   | -0.24382 | 2.09E-08 | 7.67E-08 |
| FNTA    | 0.245775 | 1.60E-08 | 5.94E-08 |
| FNTB    | -0.08302 | 5.97E-02 | 8.67E-02 |
| FOLH1B  | 0.135835 | 2.01E-03 | 3.84E-03 |
| FOLH1   | 0.136095 | 1.97E-03 | 3.77E-03 |

|         |          |           |           |
|---------|----------|-----------|-----------|
| FOLR1   | -0.55054 | 3.78E-42  | 1.94E-40  |
| FOLR2   | -0.23687 | 5.33E-08  | 1.87E-07  |
| FOLR3   | -0.13201 | 2.69E-03  | 5.04E-03  |
| FOLR4   | -0.07801 | 7.70E-02  | 1.09E-01  |
| FOSB    | -0.22904 | 1.48E-07  | 4.96E-07  |
| FOSL1   | 0.377348 | 7.14E-19  | 7.49E-18  |
| FOSL2   | 0.126194 | 4.13E-03  | 7.51E-03  |
| FOS     | -0.36431 | 1.31E-17  | 1.23E-16  |
| FOXA1   | 0.150122 | 6.31E-04  | 1.31E-03  |
| FOXA2   | -0.42327 | 8.40E-24  | 1.36E-22  |
| FOXA3   | -0.02515 | 5.69E-01  | 6.29E-01  |
| FOXB1   | 0.107948 | 1.42E-02  | 2.35E-02  |
| FOXB2   | 0.099263 | 2.43E-02  | 3.82E-02  |
| FOXC1   | 0.080948 | 6.64E-02  | 9.56E-02  |
| FOXC2   | -0.03736 | 3.97E-01  | 4.64E-01  |
| FOXD1   | 0.271053 | 4.01E-10  | 1.80E-09  |
| FOXD2   | 0.062995 | 1.53E-01  | 2.02E-01  |
| FOXD3   | 0.3013   | 2.87E-12  | 1.61E-11  |
| FOXD4L1 | -0.17353 | 7.54E-05  | 1.79E-04  |
| FOXD4L2 | -0.18855 | 1.65E-05  | 4.30E-05  |
| FOXD4L3 | -0.06088 | 1.68E-01  | 2.18E-01  |
| FOXD4L5 | -0.17759 | 5.06E-05  | 1.23E-04  |
| FOXD4L6 | -0.1922  | 1.12E-05  | 2.98E-05  |
| FOXD4   | -0.24655 | 1.43E-08  | 5.36E-08  |
| FOXE1   | 0.105863 | 1.62E-02  | 2.65E-02  |
| FOXE3   | 0.222754 | 3.27E-07  | 1.06E-06  |
| FOXF1   | -0.39284 | 1.89E-20  | 2.29E-19  |
| FOXF2   | -0.38498 | 1.22E-19  | 1.38E-18  |
| FOXG1   | 0.291636 | 1.48E-11  | 7.68E-11  |
| FOXH1   | 0.065204 | 1.39E-01  | 1.85E-01  |
| FOXI1   | -0.1016  | 2.11E-02  | 3.36E-02  |
| FOXI2   | -0.34257 | 1.26E-15  | 9.73E-15  |
| FOXI3   | 0.119074 | 6.82E-03  | 1.19E-02  |
| FOXJ1   | -0.16347 | 1.95E-04  | 4.36E-04  |
| FOXJ2   | -0.13826 | 1.66E-03  | 3.22E-03  |
| FOXJ3   | -0.00049 | 9.91E-01  | 9.93E-01  |
| FOXK1   | 0.074987 | 8.91E-02  | 1.24E-01  |
| FOXK2   | 0.290348 | 1.84E-11  | 9.43E-11  |
| FOXL1   | -0.1239  | 4.87E-03  | 8.76E-03  |
| FOXL2   | 0.222147 | 3.53E-07  | 1.13E-06  |
| FOXM1   | 0.831018 | 8.88E-133 | 2.73E-130 |
| FOXN1   | -0.26593 | 8.74E-10  | 3.76E-09  |
| FOXN2   | 0.327668 | 2.36E-14  | 1.62E-13  |
| FOXN3   | -0.2676  | 6.79E-10  | 2.96E-09  |

|          |          |          |          |
|----------|----------|----------|----------|
| FOXN4    | 0.085864 | 5.15E-02 | 7.57E-02 |
| FOXO1    | -0.33113 | 1.21E-14 | 8.52E-14 |
| FOXO3B   | -0.18887 | 1.60E-05 | 4.17E-05 |
| FOXO3    | -0.25589 | 3.83E-09 | 1.53E-08 |
| FOXO4    | -0.34184 | 1.46E-15 | 1.12E-14 |
| FOXP1    | -0.36194 | 2.19E-17 | 2.04E-16 |
| FOXP2    | 0.058913 | 1.82E-01 | 2.35E-01 |
| FOXP3    | 0.054813 | 2.14E-01 | 2.71E-01 |
| FOXP4    | -0.2632  | 1.31E-09 | 5.54E-09 |
| FOXQ1    | -0.27986 | 1.01E-10 | 4.80E-10 |
| FOXR1    | 0.066724 | 1.30E-01 | 1.75E-01 |
| FOXR2    | 0.107396 | 1.48E-02 | 2.43E-02 |
| FOXRED1  | 0.136808 | 1.86E-03 | 3.58E-03 |
| FOXRED2  | 0.130374 | 3.04E-03 | 5.65E-03 |
| FOXS1    | -0.26189 | 1.60E-09 | 6.67E-09 |
| FPGS     | -0.15914 | 2.88E-04 | 6.28E-04 |
| FPGT     | -0.00103 | 9.81E-01 | 9.86E-01 |
| FPR1     | 0.058902 | 1.82E-01 | 2.35E-01 |
| FPR2     | 0.153821 | 4.60E-04 | 9.70E-04 |
| FPR3     | 0.053831 | 2.23E-01 | 2.80E-01 |
| FRAS1    | -0.19253 | 1.08E-05 | 2.88E-05 |
| FRAT1    | -0.52526 | 7.29E-38 | 2.96E-36 |
| FRAT2    | -0.1177  | 7.50E-03 | 1.30E-02 |
| FREM1    | -0.10631 | 1.58E-02 | 2.59E-02 |
| FREM2    | -0.35838 | 4.72E-17 | 4.24E-16 |
| FRG1B    | -0.13521 | 2.10E-03 | 4.01E-03 |
| FRG1     | 0.160491 | 2.55E-04 | 5.61E-04 |
| FRG2B    | 0.083519 | 5.82E-02 | 8.47E-02 |
| FRG2C    | 0.006633 | 8.81E-01 | 9.03E-01 |
| FRG2     | 0.064764 | 1.42E-01 | 1.88E-01 |
| FRK      | 0.107592 | 1.46E-02 | 2.40E-02 |
| FRMD1    | -0.05725 | 1.95E-01 | 2.49E-01 |
| FRMD3    | -0.04102 | 3.53E-01 | 4.19E-01 |
| FRMD4A   | -0.11001 | 1.25E-02 | 2.08E-02 |
| FRMD4B   | -0.26091 | 1.84E-09 | 7.64E-09 |
| FRMD5    | 0.380358 | 3.58E-19 | 3.87E-18 |
| FRMD6    | 0.191003 | 1.28E-05 | 3.37E-05 |
| FRMD7    | 0.020966 | 6.35E-01 | 6.90E-01 |
| FRMD8    | 0.100879 | 2.20E-02 | 3.50E-02 |
| FRMPD1   | 0.031624 | 4.74E-01 | 5.40E-01 |
| FRMPD2L1 | -0.11002 | 1.25E-02 | 2.08E-02 |
| FRMPD2   | -0.12522 | 4.43E-03 | 8.02E-03 |
| FRMPD4   | -0.25103 | 7.67E-09 | 2.96E-08 |
| FRRS1    | 0.258383 | 2.67E-09 | 1.09E-08 |



|          |          |          |          |
|----------|----------|----------|----------|
| FRS2     | -0.04996 | 2.58E-01 | 3.19E-01 |
| FRS3     | -0.3006  | 3.24E-12 | 1.81E-11 |
| FRYL     | 0.01451  | 7.43E-01 | 7.86E-01 |
| FRY      | -0.45247 | 2.34E-27 | 4.98E-26 |
| FRZB     | -0.40514 | 9.17E-22 | 1.23E-20 |
| FSCB     | -0.02697 | 5.41E-01 | 6.04E-01 |
| FSCN1    | 0.338631 | 2.77E-15 | 2.07E-14 |
| FSCN2    | -0.2221  | 3.55E-07 | 1.14E-06 |
| FSCN3    | -0.05618 | 2.03E-01 | 2.58E-01 |
| FSD1L    | 0.182192 | 3.19E-05 | 7.96E-05 |
| FSD1     | 0.380474 | 3.48E-19 | 3.77E-18 |
| FSD2     | -0.12338 | 5.05E-03 | 9.06E-03 |
| FSHB     | 0.018397 | 6.77E-01 | 7.28E-01 |
| FSHR     | -0.17293 | 7.99E-05 | 1.89E-04 |
| FSIP1    | 0.040222 | 3.62E-01 | 4.29E-01 |
| FSTL1    | 0.039131 | 3.76E-01 | 4.42E-01 |
| FSTL3    | -0.05669 | 1.99E-01 | 2.54E-01 |
| FSTL4    | -0.14403 | 1.05E-03 | 2.10E-03 |
| FSTL5    | 0.246752 | 1.39E-08 | 5.22E-08 |
| FST      | 0.117559 | 7.57E-03 | 1.31E-02 |
| FTCD     | 0.171421 | 9.24E-05 | 2.16E-04 |
| FTH1     | 0.092494 | 3.59E-02 | 5.45E-02 |
| FTHL17   | 0.127454 | 3.77E-03 | 6.89E-03 |
| FTHL3    | 0.130032 | 3.11E-03 | 5.78E-03 |
| FTLP10   | -0.01418 | 7.48E-01 | 7.90E-01 |
| FTL      | 9.68E-05 | 9.98E-01 | 9.99E-01 |
| FTMT     | 0.023374 | 5.97E-01 | 6.55E-01 |
| FTO      | -0.30064 | 3.22E-12 | 1.80E-11 |
| FTSJ1    | 0.299984 | 3.60E-12 | 2.00E-11 |
| FTSJ2    | 0.181643 | 3.37E-05 | 8.39E-05 |
| FTSJ3    | 0.243728 | 2.11E-08 | 7.76E-08 |
| FTSJD1   | -0.09242 | 3.60E-02 | 5.47E-02 |
| FTSJD2   | 0.042834 | 3.32E-01 | 3.97E-01 |
| FUBP1    | 0.283429 | 5.71E-11 | 2.77E-10 |
| FUBP3    | 0.223498 | 2.98E-07 | 9.66E-07 |
| FUCA1    | -0.37203 | 2.38E-18 | 2.40E-17 |
| FUCA2    | 0.458157 | 4.33E-28 | 9.73E-27 |
| FUK      | -0.36821 | 5.56E-18 | 5.39E-17 |
| FUNDC1   | 0.087945 | 4.61E-02 | 6.85E-02 |
| FUNDC2P2 | 0.118728 | 6.99E-03 | 1.22E-02 |
| FUNDC2   | 0.061816 | 1.61E-01 | 2.11E-01 |
| FURIN    | 0.013102 | 7.67E-01 | 8.06E-01 |
| FUS      | 0.10682  | 1.53E-02 | 2.51E-02 |
| FUT10    | -0.05539 | 2.09E-01 | 2.65E-01 |

|        |          |          |          |
|--------|----------|----------|----------|
| FUT11  | 0.129287 | 3.29E-03 | 6.09E-03 |
| FUT1   | -0.11879 | 6.96E-03 | 1.21E-02 |
| FUT2   | -0.08759 | 4.70E-02 | 6.96E-02 |
| FUT3   | -0.17996 | 4.00E-05 | 9.84E-05 |
| FUT4   | 0.124866 | 4.54E-03 | 8.21E-03 |
| FUT5   | 0.120208 | 6.31E-03 | 1.11E-02 |
| FUT6   | -0.09814 | 2.59E-02 | 4.06E-02 |
| FUT7   | -0.14133 | 1.30E-03 | 2.57E-03 |
| FUT8   | 0.018568 | 6.74E-01 | 7.25E-01 |
| FUT9   | 0.163073 | 2.02E-04 | 4.51E-04 |
| FUZ    | -0.20937 | 1.64E-06 | 4.85E-06 |
| FXC1   | -0.31248 | 3.97E-13 | 2.43E-12 |
| FXN    | -0.05273 | 2.32E-01 | 2.91E-01 |
| FXR1   | 0.396489 | 7.80E-21 | 9.79E-20 |
| FXR2   | -0.10247 | 2.00E-02 | 3.21E-02 |
| FXYD1  | -0.58391 | 2.14E-48 | 1.40E-46 |
| FXYD2  | 0.004956 | 9.11E-01 | 9.28E-01 |
| FXYD3  | -0.21023 | 1.49E-06 | 4.40E-06 |
| FXYD4  | -0.15582 | 3.86E-04 | 8.25E-04 |
| FXYD5  | -0.01308 | 7.67E-01 | 8.06E-01 |
| FXYD6  | -0.22635 | 2.08E-07 | 6.87E-07 |
| FXYD7  | -0.13488 | 2.16E-03 | 4.11E-03 |
| FYB    | 0.078116 | 7.65E-02 | 1.09E-01 |
| FYCO1  | -0.43735 | 1.79E-25 | 3.28E-24 |
| FYN    | -0.05212 | 2.38E-01 | 2.97E-01 |
| FYTDD1 | 0.390999 | 2.94E-20 | 3.52E-19 |
| FZD10  | 0.088033 | 4.58E-02 | 6.82E-02 |
| FZD1   | -0.19685 | 6.78E-06 | 1.86E-05 |
| FZD2   | 0.027286 | 5.37E-01 | 5.99E-01 |
| FZD3   | -0.0473  | 2.84E-01 | 3.46E-01 |
| FZD4   | -0.19501 | 8.29E-06 | 2.24E-05 |
| FZD5   | -0.17771 | 5.00E-05 | 1.22E-04 |
| FZD6   | 0.033555 | 4.47E-01 | 5.14E-01 |
| FZD7   | -0.1903  | 1.37E-05 | 3.61E-05 |
| FZD8   | -0.29709 | 5.91E-12 | 3.20E-11 |
| FZD9   | -0.08169 | 6.40E-02 | 9.24E-02 |
| FZR1   | 0.046078 | 2.97E-01 | 3.60E-01 |
| G0S2   | 0.173541 | 7.53E-05 | 1.79E-04 |
| G2E3   | 0.465378 | 4.85E-29 | 1.17E-27 |
| G3BP1  | 0.362013 | 2.16E-17 | 2.01E-16 |
| G3BP2  | 0.114707 | 9.18E-03 | 1.57E-02 |
| G6PC2  | -0.18065 | 3.73E-05 | 9.22E-05 |
| G6PC3  | -0.05335 | 2.27E-01 | 2.85E-01 |
| G6PC   | 0.109063 | 1.33E-02 | 2.20E-02 |

|            |          |          |          |
|------------|----------|----------|----------|
| G6PD       | 0.237955 | 4.61E-08 | 1.63E-07 |
| GAA        | -0.01356 | 7.59E-01 | 7.99E-01 |
| GAB1       | -0.21391 | 9.61E-07 | 2.92E-06 |
| GAB2       | -0.20335 | 3.28E-06 | 9.36E-06 |
| GAB3       | -0.28444 | 4.84E-11 | 2.37E-10 |
| GAB4       | 0.124112 | 4.79E-03 | 8.64E-03 |
| GABARAPL1  | -0.06682 | 1.30E-01 | 1.74E-01 |
| GABARAPL2  | -0.20605 | 2.41E-06 | 6.97E-06 |
| GABARAPL3  | 0.004581 | 9.17E-01 | 9.34E-01 |
| GABARAP    | -0.21005 | 1.52E-06 | 4.49E-06 |
| GABBR1     | -0.26458 | 1.07E-09 | 4.56E-09 |
| GABBR2     | -0.11621 | 8.30E-03 | 1.43E-02 |
| GABPA      | -0.06457 | 1.43E-01 | 1.90E-01 |
| GABPB1     | 0.493028 | 6.73E-33 | 2.06E-31 |
| GABPB2     | -0.14524 | 9.48E-04 | 1.91E-03 |
| GABRA1     | 0.128438 | 3.50E-03 | 6.45E-03 |
| GABRA2     | 0.206107 | 2.40E-06 | 6.93E-06 |
| GABRA3     | 0.26398  | 1.17E-09 | 4.96E-09 |
| GABRA4     | -0.13017 | 3.08E-03 | 5.73E-03 |
| GABRA5     | 0.056414 | 2.01E-01 | 2.56E-01 |
| GABRA6     | -0.00715 | 8.71E-01 | 8.95E-01 |
| GABRB1     | -0.03404 | 4.41E-01 | 5.07E-01 |
| GABRB2     | -0.0326  | 4.60E-01 | 5.26E-01 |
| GABRB3     | -0.08837 | 4.50E-02 | 6.71E-02 |
| GABRD      | -0.12176 | 5.66E-03 | 1.01E-02 |
| GABRE      | -0.22093 | 4.10E-07 | 1.31E-06 |
| GABRG1     | -0.10381 | 1.85E-02 | 2.98E-02 |
| GABRG2     | 0.198282 | 5.79E-06 | 1.60E-05 |
| GABRG3     | -0.03617 | 4.13E-01 | 4.79E-01 |
| GABRP      | -0.06588 | 1.35E-01 | 1.81E-01 |
| GABRQ      | 0.303476 | 1.97E-12 | 1.13E-11 |
| GABRR1     | 0.084361 | 5.57E-02 | 8.14E-02 |
| GABRR2     | -0.02143 | 6.28E-01 | 6.83E-01 |
| GABRR3     | 0.030744 | 4.86E-01 | 5.51E-01 |
| GAD1       | 0.266181 | 8.41E-10 | 3.63E-09 |
| GAD2       | 0.110186 | 1.23E-02 | 2.06E-02 |
| GADD45A    | 0.214757 | 8.69E-07 | 2.65E-06 |
| GADD45B    | -0.13735 | 1.78E-03 | 3.44E-03 |
| GADD45GIP1 | 0.187531 | 1.84E-05 | 4.76E-05 |
| GADD45G    | -0.29349 | 1.09E-11 | 5.71E-11 |
| GADL1      | -0.22011 | 4.54E-07 | 1.44E-06 |
| GAGE10     | 0.072257 | 1.01E-01 | 1.39E-01 |
| GAGE12D    | 0.193878 | 9.37E-06 | 2.52E-05 |
| GAGE12F    | 0.077166 | 8.02E-02 | 1.13E-01 |

|         |          |          |          |
|---------|----------|----------|----------|
| GAGE12J | 0.177764 | 4.98E-05 | 1.21E-04 |
| GAGE13  | 0.117474 | 7.61E-03 | 1.32E-02 |
| GAGE1   | 0.192882 | 1.04E-05 | 2.78E-05 |
| GAGE2A  | 0.159288 | 2.84E-04 | 6.20E-04 |
| GAGE2B  | 0.175257 | 6.37E-05 | 1.53E-04 |
| GAGE2C  | 0.148367 | 7.31E-04 | 1.50E-03 |
| GAGE2D  | 0.21996  | 4.62E-07 | 1.46E-06 |
| GAGE2E  | 0.122517 | 5.37E-03 | 9.58E-03 |
| GAGE4   | 0.198305 | 5.78E-06 | 1.60E-05 |
| GAGE8   | 0.161373 | 2.36E-04 | 5.21E-04 |
| GAK     | -0.07672 | 8.19E-02 | 1.15E-01 |
| GAL3ST1 | -0.28716 | 3.11E-11 | 1.55E-10 |
| GAL3ST2 | 0.190249 | 1.38E-05 | 3.63E-05 |
| GAL3ST3 | 0.174643 | 6.77E-05 | 1.62E-04 |
| GAL3ST4 | 0.110565 | 1.20E-02 | 2.02E-02 |
| GALC    | -0.16467 | 1.74E-04 | 3.93E-04 |
| GALE    | -0.02727 | 5.37E-01 | 6.00E-01 |
| GALK1   | 0.204461 | 2.89E-06 | 8.30E-06 |
| GALK2   | 0.0003   | 9.95E-01 | 9.96E-01 |
| GALM    | 0.026014 | 5.56E-01 | 6.17E-01 |
| GALNS   | 0.034143 | 4.39E-01 | 5.06E-01 |
| GALNT10 | -0.26959 | 5.02E-10 | 2.22E-09 |
| GALNT11 | -0.45283 | 2.11E-27 | 4.50E-26 |
| GALNT12 | -0.28997 | 1.96E-11 | 1.00E-10 |
| GALNT13 | 0.098195 | 2.59E-02 | 4.04E-02 |
| GALNT14 | 0.235824 | 6.12E-08 | 2.13E-07 |
| GALNT1  | 0.122201 | 5.49E-03 | 9.78E-03 |
| GALNT2  | 0.174634 | 6.77E-05 | 1.62E-04 |
| GALNT3  | 0.146445 | 8.58E-04 | 1.74E-03 |
| GALNT4  | 0.200085 | 4.74E-06 | 1.33E-05 |
| GALNT5  | -0.07223 | 1.02E-01 | 1.40E-01 |
| GALNT6  | 0.240201 | 3.41E-08 | 1.22E-07 |
| GALNT7  | 0.0458   | 3.00E-01 | 3.63E-01 |
| GALNT8  | 0.092583 | 3.57E-02 | 5.43E-02 |
| GALNT9  | 0.133081 | 2.48E-03 | 4.67E-03 |
| GALNTL1 | -0.30791 | 9.01E-13 | 5.31E-12 |
| GALNTL2 | -0.17015 | 1.04E-04 | 2.43E-04 |
| GALNTL4 | -0.39459 | 1.24E-20 | 1.53E-19 |
| GALNTL5 | -0.01659 | 7.07E-01 | 7.55E-01 |
| GALNTL6 | -0.16072 | 2.50E-04 | 5.50E-04 |
| GALP    | 0.143585 | 1.09E-03 | 2.17E-03 |
| GALR1   | 0.095201 | 3.08E-02 | 4.74E-02 |
| GALR2   | 0.124279 | 4.74E-03 | 8.54E-03 |
| GALR3   | 0.098824 | 2.49E-02 | 3.91E-02 |

|         |          |          |          |
|---------|----------|----------|----------|
| GALT    | -0.23896 | 4.03E-08 | 1.43E-07 |
| GAL     | 0.429177 | 1.71E-24 | 2.90E-23 |
| GAMT    | -0.00279 | 9.50E-01 | 9.60E-01 |
| GANAB   | 0.298969 | 4.29E-12 | 2.36E-11 |
| GANC    | -0.54715 | 1.49E-41 | 7.35E-40 |
| GAN     | 0.185761 | 2.21E-05 | 5.66E-05 |
| GAP43   | 0.283401 | 5.73E-11 | 2.78E-10 |
| GAPDHS  | 0.029387 | 5.06E-01 | 5.70E-01 |
| GAPDH   | 0.606764 | 4.14E-53 | 3.02E-51 |
| GAPT    | -0.33474 | 5.98E-15 | 4.34E-14 |
| GAPVD1  | -0.14445 | 1.01E-03 | 2.03E-03 |
| GAR1    | 0.281493 | 7.79E-11 | 3.74E-10 |
| GARNL3  | -0.35979 | 3.49E-17 | 3.18E-16 |
| GARS    | 0.446645 | 1.28E-26 | 2.55E-25 |
| GART    | 0.452195 | 2.54E-27 | 5.39E-26 |
| GAS1    | 0.024064 | 5.86E-01 | 6.44E-01 |
| GAS2L1  | 0.074644 | 9.06E-02 | 1.26E-01 |
| GAS2L2  | -0.36284 | 1.81E-17 | 1.69E-16 |
| GAS2L3  | 0.544052 | 5.16E-41 | 2.49E-39 |
| GAS2    | -0.02164 | 6.24E-01 | 6.80E-01 |
| GAS5    | -0.13128 | 2.84E-03 | 5.30E-03 |
| GAS6    | -0.34469 | 8.20E-16 | 6.50E-15 |
| GAS7    | -0.26357 | 1.24E-09 | 5.26E-09 |
| GAS8    | -0.32609 | 3.18E-14 | 2.16E-13 |
| GAST    | 0.213108 | 1.06E-06 | 3.19E-06 |
| GATA1   | -0.3441  | 9.23E-16 | 7.25E-15 |
| GATA2   | -0.21835 | 5.63E-07 | 1.76E-06 |
| GATA3   | 0.062522 | 1.57E-01 | 2.05E-01 |
| GATA4   | -0.02919 | 5.09E-01 | 5.72E-01 |
| GATA5   | -0.42276 | 9.61E-24 | 1.55E-22 |
| GATA6   | -0.33079 | 1.29E-14 | 9.08E-14 |
| GATAD1  | -0.07065 | 1.09E-01 | 1.49E-01 |
| GATAD2A | 0.054489 | 2.17E-01 | 2.74E-01 |
| GATAD2B | -0.16741 | 1.35E-04 | 3.09E-04 |
| GATC    | 0.415171 | 7.08E-23 | 1.04E-21 |
| GATM    | -0.04546 | 3.03E-01 | 3.67E-01 |
| GATSL1  | 0.30109  | 2.98E-12 | 1.67E-11 |
| GATSL2  | 0.183696 | 2.74E-05 | 6.90E-05 |
| GATSL3  | -0.30771 | 9.34E-13 | 5.50E-12 |
| GATS    | 0.102729 | 1.97E-02 | 3.16E-02 |
| GBA2    | -0.11965 | 6.56E-03 | 1.15E-02 |
| GBA3    | -0.05875 | 1.83E-01 | 2.36E-01 |
| GBAP1   | 0.129845 | 3.16E-03 | 5.86E-03 |
| GBAS    | 0.081622 | 6.42E-02 | 9.27E-02 |

|         |          |          |          |
|---------|----------|----------|----------|
| GBA     | 0.118382 | 7.16E-03 | 1.25E-02 |
| GBE1    | 0.250222 | 8.59E-09 | 3.30E-08 |
| GBF1    | -0.11201 | 1.10E-02 | 1.85E-02 |
| GBGT1   | -0.25519 | 4.24E-09 | 1.69E-08 |
| GBP1    | 0.358413 | 4.68E-17 | 4.21E-16 |
| GBP2    | 0.184512 | 2.52E-05 | 6.38E-05 |
| GBP3    | 0.0573   | 1.94E-01 | 2.49E-01 |
| GBP4    | 0.122312 | 5.45E-03 | 9.71E-03 |
| GBP5    | 0.251418 | 7.26E-09 | 2.81E-08 |
| GBP6    | 0.050727 | 2.51E-01 | 3.11E-01 |
| GBP7    | 0.161626 | 2.30E-04 | 5.10E-04 |
| GBX1    | 0.154622 | 4.29E-04 | 9.10E-04 |
| GBX2    | 0.403967 | 1.23E-21 | 1.64E-20 |
| GCAT    | -0.10065 | 2.24E-02 | 3.54E-02 |
| GCA     | 0.119176 | 6.78E-03 | 1.19E-02 |
| GCC1    | 0.070044 | 1.12E-01 | 1.53E-01 |
| GCC2    | -0.23825 | 4.43E-08 | 1.57E-07 |
| GCDH    | -0.20189 | 3.87E-06 | 1.09E-05 |
| GCET2   | -0.25271 | 6.04E-09 | 2.36E-08 |
| GCFC1   | -0.03157 | 4.75E-01 | 5.40E-01 |
| GCGR    | 0.110427 | 1.22E-02 | 2.03E-02 |
| GCG     | 0.07424  | 9.24E-02 | 1.28E-01 |
| GCH1    | 0.302554 | 2.31E-12 | 1.31E-11 |
| GCHFR   | -0.05995 | 1.74E-01 | 2.26E-01 |
| GCKR    | 0.104088 | 1.81E-02 | 2.93E-02 |
| GCK     | -0.02384 | 5.89E-01 | 6.48E-01 |
| GCLC    | 0.344176 | 9.09E-16 | 7.16E-15 |
| GCLM    | 0.297071 | 5.94E-12 | 3.21E-11 |
| GCM1    | 0.022237 | 6.15E-01 | 6.71E-01 |
| GCM2    | 0.074421 | 9.16E-02 | 1.27E-01 |
| GCN1L1  | 0.300041 | 3.57E-12 | 1.98E-11 |
| GCNT1   | 0.083182 | 5.92E-02 | 8.61E-02 |
| GCNT2   | -0.01795 | 6.84E-01 | 7.34E-01 |
| GCNT3   | 0.016275 | 7.13E-01 | 7.60E-01 |
| GCNT4   | -0.25769 | 2.95E-09 | 1.20E-08 |
| GCNT7   | -0.12299 | 5.19E-03 | 9.29E-03 |
| GCOM1   | -0.23405 | 7.73E-08 | 2.67E-07 |
| GCSH    | 0.166486 | 1.47E-04 | 3.35E-04 |
| GC      | -0.10958 | 1.28E-02 | 2.14E-02 |
| GDAP1L1 | -0.05031 | 2.54E-01 | 3.15E-01 |
| GDAP1   | 0.072605 | 9.98E-02 | 1.37E-01 |
| GDAP2   | 0.055682 | 2.07E-01 | 2.63E-01 |
| GDA     | 0.168068 | 1.27E-04 | 2.92E-04 |
| GDE1    | -0.26931 | 5.23E-10 | 2.31E-09 |

|          |          |          |          |
|----------|----------|----------|----------|
| GDEP     | -0.06388 | 1.48E-01 | 1.95E-01 |
| GDF10    | -0.43763 | 1.66E-25 | 3.05E-24 |
| GDF11    | 0.076813 | 8.16E-02 | 1.15E-01 |
| GDF15    | -0.27961 | 1.05E-10 | 4.98E-10 |
| GDF1     | 0.244257 | 1.97E-08 | 7.25E-08 |
| GDF2     | -0.15163 | 5.55E-04 | 1.16E-03 |
| GDF3     | -0.16895 | 1.17E-04 | 2.70E-04 |
| GDF5     | -0.16021 | 2.62E-04 | 5.74E-04 |
| GDF6     | 0.071286 | 1.06E-01 | 1.45E-01 |
| GDF7     | -0.25289 | 5.89E-09 | 2.31E-08 |
| GDF9     | -0.06277 | 1.55E-01 | 2.03E-01 |
| GDI1     | 0.146521 | 8.53E-04 | 1.73E-03 |
| GDI2     | 0.262562 | 1.44E-09 | 6.06E-09 |
| GDNF     | 0.061901 | 1.61E-01 | 2.10E-01 |
| GDPD1    | 0.008075 | 8.55E-01 | 8.82E-01 |
| GDPD2    | 0.004353 | 9.21E-01 | 9.37E-01 |
| GDPD3    | 0.000279 | 9.95E-01 | 9.96E-01 |
| GDPD4    | 0.101446 | 2.13E-02 | 3.39E-02 |
| GDPD5    | -0.16689 | 1.42E-04 | 3.23E-04 |
| GEFT     | 0.004723 | 9.15E-01 | 9.32E-01 |
| GEMIN4   | -0.1213  | 5.85E-03 | 1.04E-02 |
| GEMIN5   | 0.078372 | 7.56E-02 | 1.07E-01 |
| GEMIN6   | 0.38192  | 2.49E-19 | 2.75E-18 |
| GEMIN7   | 0.284341 | 4.92E-11 | 2.40E-10 |
| GEMIN8P4 | 0.274437 | 2.38E-10 | 1.09E-09 |
| GEMIN8   | -0.3195  | 1.10E-13 | 7.07E-13 |
| GEM      | -0.30302 | 2.13E-12 | 1.21E-11 |
| GEN1     | 0.619217 | 7.66E-56 | 5.95E-54 |
| GET4     | 0.12664  | 4.00E-03 | 7.29E-03 |
| GFAP     | 0.260334 | 2.01E-09 | 8.28E-09 |
| GFER     | -0.06596 | 1.35E-01 | 1.80E-01 |
| GFI1B    | -0.32059 | 8.96E-14 | 5.84E-13 |
| GFI1     | 0.104669 | 1.75E-02 | 2.84E-02 |
| GFM1     | 0.384389 | 1.40E-19 | 1.58E-18 |
| GFM2     | 0.215886 | 7.58E-07 | 2.33E-06 |
| GFOD1    | -0.09937 | 2.41E-02 | 3.80E-02 |
| GFOD2    | -0.03756 | 3.95E-01 | 4.62E-01 |
| GFPT1    | 0.115537 | 8.68E-03 | 1.49E-02 |
| GFPT2    | 0.248755 | 1.06E-08 | 4.01E-08 |
| GFRA1    | -0.57298 | 2.86E-46 | 1.76E-44 |
| GFRA2    | -0.29554 | 7.70E-12 | 4.11E-11 |
| GFRA3    | -0.25496 | 4.38E-09 | 1.74E-08 |
| GFRA4    | 0.108025 | 1.42E-02 | 2.34E-02 |
| GFRAL    | 0.066841 | 1.30E-01 | 1.74E-01 |

|        |          |           |           |
|--------|----------|-----------|-----------|
| GGA1   | -0.2287  | 1.55E-07  | 5.17E-07  |
| GGA2   | -0.44766 | 9.52E-27  | 1.93E-25  |
| GGA3   | -0.12339 | 5.05E-03  | 9.06E-03  |
| GGCT   | 0.183452 | 2.81E-05  | 7.06E-05  |
| GGCX   | -0.21283 | 1.09E-06  | 3.29E-06  |
| GGH    | 0.574708 | 1.34E-46  | 8.29E-45  |
| GGNBP1 | 0.110659 | 1.20E-02  | 2.01E-02  |
| GGNBP2 | -0.00384 | 9.31E-01  | 9.45E-01  |
| GGN    | -0.06488 | 1.41E-01  | 1.88E-01  |
| GGPS1  | -0.15568 | 3.91E-04  | 8.35E-04  |
| GGT1   | -0.21415 | 9.34E-07  | 2.84E-06  |
| GGT3P  | -0.3814  | 2.81E-19  | 3.07E-18  |
| GGT5   | -0.30976 | 6.47E-13  | 3.88E-12  |
| GGT6   | -0.46416 | 7.04E-29  | 1.68E-27  |
| GGT7   | -0.317   | 1.74E-13  | 1.10E-12  |
| GGT8P  | -0.19719 | 6.53E-06  | 1.79E-05  |
| GGTA1  | -0.28719 | 3.10E-11  | 1.55E-10  |
| GGTLC1 | -0.5804  | 1.05E-47  | 6.78E-46  |
| GGTLC2 | -0.27319 | 2.88E-10  | 1.32E-09  |
| GH1    | -0.0229  | 6.04E-01  | 6.61E-01  |
| GH2    | 0.148892 | 7.00E-04  | 1.44E-03  |
| GHDC   | -0.42102 | 1.53E-23  | 2.40E-22  |
| GHITM  | 0.086433 | 5.00E-02  | 7.37E-02  |
| GHRHR  | 0.014395 | 7.45E-01  | 7.87E-01  |
| GHRH   | 0.077703 | 7.81E-02  | 1.11E-01  |
| GHRLOS | -0.10767 | 1.45E-02  | 2.39E-02  |
| GHRL   | -0.34926 | 3.21E-16  | 2.64E-15  |
| GHR    | -0.31995 | 1.01E-13  | 6.53E-13  |
| GHSR   | 0.015241 | 7.30E-01  | 7.75E-01  |
| GIF    | -0.0444  | 3.15E-01  | 3.79E-01  |
| GIGYF1 | -0.18018 | 3.91E-05  | 9.64E-05  |
| GIGYF2 | -0.14935 | 6.74E-04  | 1.39E-03  |
| GIMAP1 | -0.23498 | 6.84E-08  | 2.38E-07  |
| GIMAP2 | -0.10587 | 1.62E-02  | 2.65E-02  |
| GIMAP4 | -0.08167 | 6.40E-02  | 9.25E-02  |
| GIMAP5 | -0.07662 | 8.24E-02  | 1.16E-01  |
| GIMAP6 | -0.17361 | 7.49E-05  | 1.78E-04  |
| GIMAP7 | -0.18536 | 2.31E-05  | 5.88E-05  |
| GIMAP8 | -0.23068 | 1.20E-07  | 4.06E-07  |
| GIN1   | -0.24855 | 1.09E-08  | 4.12E-08  |
| GINS1  | 0.759069 | 1.09E-97  | 1.68E-95  |
| GINS2  | 0.773957 | 7.27E-104 | 1.24E-101 |
| GINS3  | 0.698867 | 1.09E-76  | 1.28E-74  |
| GINS4  | 0.699638 | 6.36E-77  | 7.48E-75  |



|        |          |          |          |
|--------|----------|----------|----------|
| GIPC1  | 0.00329  | 9.41E-01 | 9.54E-01 |
| GIPC2  | -0.0255  | 5.64E-01 | 6.24E-01 |
| GIPC3  | -0.10152 | 2.12E-02 | 3.38E-02 |
| GIPR   | -0.33137 | 1.15E-14 | 8.15E-14 |
| GIP    | 0.259937 | 2.13E-09 | 8.75E-09 |
| GIT1   | 0.213203 | 1.05E-06 | 3.16E-06 |
| GIT2   | -0.06339 | 1.51E-01 | 1.99E-01 |
| GIYD2  | -0.01134 | 7.97E-01 | 8.33E-01 |
| GJA10  | 0.132943 | 2.50E-03 | 4.71E-03 |
| GJA1   | 0.079654 | 7.09E-02 | 1.01E-01 |
| GJA3   | 0.151431 | 5.65E-04 | 1.18E-03 |
| GJA4   | -0.1616  | 2.31E-04 | 5.11E-04 |
| GJA5   | -0.114   | 9.62E-03 | 1.64E-02 |
| GJA8   | 0.047136 | 2.86E-01 | 3.48E-01 |
| GJA9   | -0.01218 | 7.83E-01 | 8.20E-01 |
| GJB1   | -0.3983  | 5.01E-21 | 6.42E-20 |
| GJB2   | 0.372653 | 2.07E-18 | 2.09E-17 |
| GJB3   | 0.248976 | 1.02E-08 | 3.89E-08 |
| GJB4   | 0.080097 | 6.93E-02 | 9.94E-02 |
| GJB5   | 0.099257 | 2.43E-02 | 3.82E-02 |
| GJB6   | 0.120179 | 6.32E-03 | 1.11E-02 |
| GJB7   | -0.03216 | 4.66E-01 | 5.32E-01 |
| GJC1   | 0.195254 | 8.07E-06 | 2.19E-05 |
| GJC2   | -0.32089 | 8.47E-14 | 5.53E-13 |
| GJC3   | 0.127968 | 3.63E-03 | 6.66E-03 |
| GJD2   | 0.087658 | 4.68E-02 | 6.94E-02 |
| GJD3   | 0.091423 | 3.81E-02 | 5.76E-02 |
| GJD4   | 0.087559 | 4.70E-02 | 6.97E-02 |
| GK2    | -0.00427 | 9.23E-01 | 9.39E-01 |
| GK3P   | -0.09463 | 3.18E-02 | 4.88E-02 |
| GK5    | 0.02941  | 5.05E-01 | 5.70E-01 |
| GKAP1  | -0.14249 | 1.19E-03 | 2.35E-03 |
| GKN1   | -0.07556 | 8.67E-02 | 1.21E-01 |
| GKN2   | -0.45023 | 4.52E-27 | 9.38E-26 |
| GK     | -0.14633 | 8.66E-04 | 1.76E-03 |
| GLA    | 0.416678 | 4.78E-23 | 7.19E-22 |
| GLB1L2 | -0.33776 | 3.30E-15 | 2.45E-14 |
| GLB1L3 | -0.29948 | 3.93E-12 | 2.17E-11 |
| GLB1L  | -0.22902 | 1.48E-07 | 4.98E-07 |
| GLB1   | -0.14831 | 7.35E-04 | 1.51E-03 |
| GLCCI1 | -0.33884 | 2.66E-15 | 1.99E-14 |
| GLCE   | 0.029193 | 5.09E-01 | 5.72E-01 |
| GLDC   | 0.288063 | 2.68E-11 | 1.35E-10 |
| GLDN   | -0.17549 | 6.23E-05 | 1.50E-04 |

|          |          |          |          |
|----------|----------|----------|----------|
| GLE1     | -0.0307  | 4.87E-01 | 5.52E-01 |
| GLG1     | -0.05138 | 2.44E-01 | 3.05E-01 |
| GLI1     | -0.28117 | 8.21E-11 | 3.93E-10 |
| GLI2     | -0.14009 | 1.44E-03 | 2.82E-03 |
| GLI3     | -0.04627 | 2.95E-01 | 3.58E-01 |
| GLI4     | -0.08971 | 4.19E-02 | 6.27E-02 |
| GLIPR1L1 | 0.051506 | 2.43E-01 | 3.03E-01 |
| GLIPR1L2 | -0.28513 | 4.34E-11 | 2.13E-10 |
| GLIPR1   | 0.026979 | 5.41E-01 | 6.04E-01 |
| GLIPR2   | -0.03505 | 4.27E-01 | 4.94E-01 |
| GLIS1    | 0.044965 | 3.08E-01 | 3.72E-01 |
| GLIS2    | -0.20612 | 2.39E-06 | 6.92E-06 |
| GLIS3    | -0.10002 | 2.32E-02 | 3.67E-02 |
| GLMN     | 0.41958  | 2.23E-23 | 3.47E-22 |
| GLO1     | 0.206244 | 2.36E-06 | 6.83E-06 |
| GLOD4    | 0.121676 | 5.69E-03 | 1.01E-02 |
| GLOD5    | -0.41713 | 4.25E-23 | 6.43E-22 |
| GLP1R    | -0.28928 | 2.19E-11 | 1.11E-10 |
| GLP2R    | -0.04759 | 2.81E-01 | 3.43E-01 |
| GLRA1    | 0.087796 | 4.64E-02 | 6.89E-02 |
| GLRA2    | 0.027911 | 5.27E-01 | 5.91E-01 |
| GLRA3    | -0.08651 | 4.98E-02 | 7.34E-02 |
| GLRA4    | -0.01451 | 7.42E-01 | 7.86E-01 |
| GLRB     | 0.027565 | 5.33E-01 | 5.96E-01 |
| GLRX2    | 0.295831 | 7.33E-12 | 3.92E-11 |
| GLRX3    | 0.392223 | 2.19E-20 | 2.65E-19 |
| GLRX5    | 0.300745 | 3.16E-12 | 1.76E-11 |
| GLRX     | 0.156735 | 3.57E-04 | 7.66E-04 |
| GLS2     | -0.37296 | 1.93E-18 | 1.96E-17 |
| GLS      | 0.011355 | 7.97E-01 | 8.32E-01 |
| GLT1D1   | 0.017456 | 6.93E-01 | 7.42E-01 |
| GLT25D1  | 0.417739 | 3.62E-23 | 5.51E-22 |
| GLT25D2  | -0.23234 | 9.66E-08 | 3.30E-07 |
| GLT8D1   | -0.11618 | 8.32E-03 | 1.43E-02 |
| GLT8D2   | -0.02863 | 5.17E-01 | 5.81E-01 |
| GLTPD1   | -0.04727 | 2.84E-01 | 3.47E-01 |
| GLTPD2   | -0.23904 | 3.99E-08 | 1.42E-07 |
| GLTP     | -0.12116 | 5.90E-03 | 1.05E-02 |
| GLTSCR1  | -0.16522 | 1.66E-04 | 3.74E-04 |
| GLTSCR2  | -0.39402 | 1.42E-20 | 1.75E-19 |
| GLUD1    | 0.007945 | 8.57E-01 | 8.84E-01 |
| GLUD2    | 0.077077 | 8.06E-02 | 1.14E-01 |
| GLUL     | -0.18464 | 2.48E-05 | 6.30E-05 |
| GLYATL1  | 0.163933 | 1.87E-04 | 4.18E-04 |

|         |          |          |          |
|---------|----------|----------|----------|
| GLYATL2 | -0.03238 | 4.63E-01 | 5.29E-01 |
| GLYATL3 | 0.130434 | 3.02E-03 | 5.62E-03 |
| GLYAT   | 0.023636 | 5.93E-01 | 6.51E-01 |
| GLYCTK  | -0.04635 | 2.94E-01 | 3.57E-01 |
| GLYR1   | -0.34186 | 1.45E-15 | 1.11E-14 |
| GM2A    | -0.0026  | 9.53E-01 | 9.63E-01 |
| GMCL1L  | 0.107753 | 1.44E-02 | 2.38E-02 |
| GMCL1   | 0.197484 | 6.32E-06 | 1.74E-05 |
| GMDS    | 0.135793 | 2.01E-03 | 3.85E-03 |
| GMEB1   | 0.245572 | 1.64E-08 | 6.10E-08 |
| GMEB2   | 0.081696 | 6.39E-02 | 9.24E-02 |
| GMFB    | 0.325736 | 3.40E-14 | 2.30E-13 |
| GMFG    | -0.14558 | 9.22E-04 | 1.86E-03 |
| GMIP    | -0.09084 | 3.93E-02 | 5.93E-02 |
| GML     | 0.005984 | 8.92E-01 | 9.13E-01 |
| GMNN    | 0.631112 | 1.43E-58 | 1.20E-56 |
| GMPPA   | 0.118912 | 6.90E-03 | 1.21E-02 |
| GMPPB   | -0.02636 | 5.51E-01 | 6.12E-01 |
| GMPR2   | -0.09351 | 3.39E-02 | 5.17E-02 |
| GMPR    | -0.33837 | 2.92E-15 | 2.17E-14 |
| GMPS    | 0.660165 | 9.23E-66 | 9.17E-64 |
| GNA11   | -0.04101 | 3.53E-01 | 4.19E-01 |
| GNA12   | 0.238717 | 4.17E-08 | 1.48E-07 |
| GNA13   | 0.429736 | 1.47E-24 | 2.50E-23 |
| GNA14   | -0.38726 | 7.15E-20 | 8.23E-19 |
| GNA15   | -0.00378 | 9.32E-01 | 9.46E-01 |
| GNAI1   | -0.07461 | 9.07E-02 | 1.26E-01 |
| GNAI2   | -0.10544 | 1.67E-02 | 2.71E-02 |
| GNAI3   | 0.444918 | 2.10E-26 | 4.14E-25 |
| GNAL    | -0.07317 | 9.72E-02 | 1.34E-01 |
| GNAO1   | -0.19896 | 5.37E-06 | 1.49E-05 |
| GNAQ    | -0.35832 | 4.78E-17 | 4.29E-16 |
| GNASAS  | 0.041482 | 3.47E-01 | 4.13E-01 |
| GNAS    | 0.005328 | 9.04E-01 | 9.23E-01 |
| GNAT1   | 0.236552 | 5.56E-08 | 1.95E-07 |
| GNAT2   | 0.141221 | 1.31E-03 | 2.59E-03 |
| GNAT3   | -0.01873 | 6.71E-01 | 7.23E-01 |
| GNAZ    | -0.07279 | 9.89E-02 | 1.36E-01 |
| GNB1L   | 0.23074  | 1.19E-07 | 4.03E-07 |
| GNB1    | 0.244768 | 1.83E-08 | 6.78E-08 |
| GNB2L1  | -0.13288 | 2.51E-03 | 4.73E-03 |
| GNB2    | 0.100532 | 2.25E-02 | 3.57E-02 |
| GNB3    | -0.04378 | 3.21E-01 | 3.86E-01 |
| GNB4    | 0.30978  | 6.45E-13 | 3.87E-12 |

|           |          |          |          |
|-----------|----------|----------|----------|
| GNB5      | 0.030903 | 4.84E-01 | 5.49E-01 |
| GNE       | 0.039409 | 3.72E-01 | 4.38E-01 |
| GNG10     | 0.156424 | 3.66E-04 | 7.86E-04 |
| GNG11     | -0.11768 | 7.51E-03 | 1.30E-02 |
| GNG12     | -0.01553 | 7.25E-01 | 7.71E-01 |
| GNG13     | -0.02868 | 5.16E-01 | 5.80E-01 |
| GNG2      | -0.17953 | 4.17E-05 | 1.03E-04 |
| GNG3      | 0.096786 | 2.81E-02 | 4.36E-02 |
| GNG4      | 0.466357 | 3.59E-29 | 8.73E-28 |
| GNG5      | 0.093158 | 3.46E-02 | 5.27E-02 |
| GNG7      | -0.56496 | 9.25E-45 | 5.35E-43 |
| GNG8      | -0.07058 | 1.10E-01 | 1.49E-01 |
| GNGT1     | 0.120027 | 6.39E-03 | 1.12E-02 |
| GNGT2     | -0.06745 | 1.26E-01 | 1.70E-01 |
| GNL1      | 0.048973 | 2.67E-01 | 3.29E-01 |
| GNL2      | 0.240882 | 3.11E-08 | 1.12E-07 |
| GNL3L     | 0.131068 | 2.88E-03 | 5.38E-03 |
| GNL3      | 0.282264 | 6.89E-11 | 3.32E-10 |
| GNLY      | 0.170626 | 9.97E-05 | 2.33E-04 |
| GNMT      | -0.50449 | 1.32E-34 | 4.45E-33 |
| GNPAT     | -0.05366 | 2.24E-01 | 2.82E-01 |
| GNPDA1    | 0.216182 | 7.32E-07 | 2.26E-06 |
| GNPDA2    | 0.05449  | 2.17E-01 | 2.74E-01 |
| GNPNAT1   | 0.50848  | 3.26E-35 | 1.13E-33 |
| GNPTAB    | -0.24909 | 1.01E-08 | 3.84E-08 |
| GNPTG     | -0.3948  | 1.18E-20 | 1.46E-19 |
| GNRH1     | -0.25404 | 5.00E-09 | 1.98E-08 |
| GNRH2     | 0.036019 | 4.15E-01 | 4.81E-01 |
| GNRHR2    | -0.45122 | 3.39E-27 | 7.12E-26 |
| GNRHR     | -0.22508 | 2.45E-07 | 8.01E-07 |
| GNS       | -0.07159 | 1.05E-01 | 1.43E-01 |
| GOLGA1    | -0.07863 | 7.46E-02 | 1.06E-01 |
| GOLGA2B   | -0.29434 | 9.44E-12 | 4.99E-11 |
| GOLGA2P3  | -0.084   | 5.68E-02 | 8.28E-02 |
| GOLGA2    | -0.11971 | 6.53E-03 | 1.15E-02 |
| GOLGA3    | -0.00909 | 8.37E-01 | 8.66E-01 |
| GOLGA4    | -0.10848 | 1.38E-02 | 2.28E-02 |
| GOLGA5    | 0.184917 | 2.41E-05 | 6.14E-05 |
| GOLGA6A   | 0.051508 | 2.43E-01 | 3.03E-01 |
| GOLGA6B   | 0.01196  | 7.87E-01 | 8.23E-01 |
| GOLGA6C   | 0.129747 | 3.18E-03 | 5.90E-03 |
| GOLGA6D   | 0.106696 | 1.54E-02 | 2.53E-02 |
| GOLGA6L10 | -0.3712  | 2.87E-18 | 2.86E-17 |
| GOLGA6L1  | -0.03708 | 4.01E-01 | 4.68E-01 |

|          |          |          |          |
|----------|----------|----------|----------|
| GOLGA6L5 | -0.31974 | 1.05E-13 | 6.78E-13 |
| GOLGA6L6 | -0.06496 | 1.41E-01 | 1.87E-01 |
| GOLGA6L9 | -0.36895 | 4.72E-18 | 4.61E-17 |
| GOLGA7B  | -0.11893 | 6.89E-03 | 1.20E-02 |
| GOLGA7   | 0.214042 | 9.46E-07 | 2.87E-06 |
| GOLGA8A  | -0.25165 | 7.02E-09 | 2.73E-08 |
| GOLGA8B  | -0.2603  | 2.02E-09 | 8.32E-09 |
| GOLGA8C  | 0.16174  | 2.28E-04 | 5.06E-04 |
| GOLGA8DP | 0.050286 | 2.55E-01 | 3.15E-01 |
| GOLGA8E  | 0.128531 | 3.48E-03 | 6.41E-03 |
| GOLGA8F  | 0.070824 | 1.08E-01 | 1.48E-01 |
| GOLGA8G  | 0.092021 | 3.68E-02 | 5.58E-02 |
| GOLGA9P  | -0.12801 | 3.62E-03 | 6.64E-03 |
| GOLGB1   | -0.16765 | 1.32E-04 | 3.03E-04 |
| GOLIM4   | 0.103694 | 1.86E-02 | 3.00E-02 |
| GOLM1    | 0.15726  | 3.40E-04 | 7.34E-04 |
| GOLPH3L  | -0.26738 | 7.02E-10 | 3.06E-09 |
| GOLPH3   | -0.01543 | 7.27E-01 | 7.72E-01 |
| GOLT1A   | -0.15813 | 3.15E-04 | 6.83E-04 |
| GOLT1B   | 0.493916 | 4.99E-33 | 1.54E-31 |
| GON4L    | -0.07087 | 1.08E-01 | 1.48E-01 |
| GOPC     | 0.148675 | 7.13E-04 | 1.47E-03 |
| GORAB    | -0.24261 | 2.47E-08 | 8.98E-08 |
| GORASP1  | -0.37314 | 1.85E-18 | 1.88E-17 |
| GORASP2  | 0.116667 | 8.04E-03 | 1.39E-02 |
| GOSR1    | 0.217791 | 6.02E-07 | 1.88E-06 |
| GOSR2    | 0.248313 | 1.12E-08 | 4.24E-08 |
| GOT1L1   | 0.062435 | 1.57E-01 | 2.06E-01 |
| GOT1     | 0.241002 | 3.06E-08 | 1.11E-07 |
| GOT2     | 0.204155 | 3.00E-06 | 8.58E-06 |
| GP1BA    | -0.24106 | 3.04E-08 | 1.10E-07 |
| GP2      | 0.034522 | 4.34E-01 | 5.01E-01 |
| GP5      | -0.12282 | 5.26E-03 | 9.39E-03 |
| GP6      | -0.12311 | 5.15E-03 | 9.22E-03 |
| GP9      | -0.32427 | 4.50E-14 | 3.01E-13 |
| GPA33    | -0.15368 | 4.66E-04 | 9.82E-04 |
| GPAA1    | -0.08034 | 6.85E-02 | 9.83E-02 |
| GPAM     | -0.16654 | 1.47E-04 | 3.34E-04 |
| GPAT2    | -0.00489 | 9.12E-01 | 9.29E-01 |
| GPATCH1  | 0.165665 | 1.59E-04 | 3.60E-04 |
| GPATCH2  | 0.199237 | 5.21E-06 | 1.45E-05 |
| GPATCH3  | -0.04502 | 3.08E-01 | 3.72E-01 |
| GPATCH4  | 0.113314 | 1.01E-02 | 1.71E-02 |
| GPATCH8  | 0.051531 | 2.43E-01 | 3.03E-01 |

|         |          |          |          |
|---------|----------|----------|----------|
| GPBAR1  | -0.10633 | 1.58E-02 | 2.58E-02 |
| GPBP1L1 | -0.26316 | 1.32E-09 | 5.58E-09 |
| GPBP1   | -0.0991  | 2.45E-02 | 3.86E-02 |
| GPC1    | 0.002412 | 9.56E-01 | 9.65E-01 |
| GPC2    | 0.321021 | 8.27E-14 | 5.40E-13 |
| GPC3    | -0.25407 | 4.98E-09 | 1.97E-08 |
| GPC4    | -0.39017 | 3.58E-20 | 4.25E-19 |
| GPC5    | -0.29367 | 1.05E-11 | 5.55E-11 |
| GPC6    | 0.415541 | 6.43E-23 | 9.53E-22 |
| GPCPD1  | -0.03082 | 4.85E-01 | 5.50E-01 |
| GPD1L   | -0.54787 | 1.12E-41 | 5.56E-40 |
| GPD1    | -0.29301 | 1.18E-11 | 6.16E-11 |
| GPD2    | 0.343265 | 1.09E-15 | 8.51E-15 |
| GPFR    | -0.21094 | 1.37E-06 | 4.07E-06 |
| GPHA2   | -0.13525 | 2.10E-03 | 4.00E-03 |
| GPHN    | -0.04942 | 2.63E-01 | 3.24E-01 |
| GPIHBP1 | -0.36851 | 5.21E-18 | 5.05E-17 |
| GPI     | 0.492123 | 9.12E-33 | 2.77E-31 |
| GPKOW   | 0.166237 | 1.51E-04 | 3.42E-04 |
| GPLD1   | -0.30061 | 3.23E-12 | 1.80E-11 |
| GPM6A   | -0.21815 | 5.77E-07 | 1.80E-06 |
| GPM6B   | -0.27793 | 1.37E-10 | 6.46E-10 |
| GPN1    | 0.57255  | 3.45E-46 | 2.10E-44 |
| GPN2    | 0.04043  | 3.60E-01 | 4.26E-01 |
| GPN3    | 0.385661 | 1.04E-19 | 1.18E-18 |
| GPNMB   | 0.007326 | 8.68E-01 | 8.93E-01 |
| GPR101  | 0.035592 | 4.20E-01 | 4.86E-01 |
| GPR107  | -0.03848 | 3.84E-01 | 4.50E-01 |
| GPR108  | -0.37848 | 5.51E-19 | 5.85E-18 |
| GPR109A | -0.04223 | 3.39E-01 | 4.04E-01 |
| GPR109B | 0.041616 | 3.46E-01 | 4.12E-01 |
| GPR110  | -0.03433 | 4.37E-01 | 5.04E-01 |
| GPR111  | 0.174531 | 6.84E-05 | 1.63E-04 |
| GPR112  | -0.25661 | 3.45E-09 | 1.39E-08 |
| GPR113  | 0.035842 | 4.17E-01 | 4.83E-01 |
| GPR114  | -0.08743 | 4.74E-02 | 7.02E-02 |
| GPR115  | 0.4808   | 3.78E-31 | 1.05E-29 |
| GPR116  | -0.58568 | 9.53E-49 | 6.26E-47 |
| GPR119  | 0.139664 | 1.49E-03 | 2.91E-03 |
| GPR120  | -0.14045 | 1.40E-03 | 2.74E-03 |
| GPR123  | -0.2633  | 1.29E-09 | 5.46E-09 |
| GPR124  | -0.16319 | 2.00E-04 | 4.46E-04 |
| GPR125  | -0.02763 | 5.32E-01 | 5.95E-01 |
| GPR126  | 0.047148 | 2.86E-01 | 3.48E-01 |

|         |          |          |          |
|---------|----------|----------|----------|
| GPR128  | 0.116883 | 7.93E-03 | 1.37E-02 |
| GPR12   | -0.27256 | 3.18E-10 | 1.44E-09 |
| GPR132  | -0.17542 | 6.27E-05 | 1.51E-04 |
| GPR133  | -0.56431 | 1.22E-44 | 6.97E-43 |
| GPR135  | -0.07323 | 9.69E-02 | 1.34E-01 |
| GPR137B | 0.143815 | 1.06E-03 | 2.13E-03 |
| GPR137C | 0.273186 | 2.88E-10 | 1.32E-09 |
| GPR137  | -0.08107 | 6.60E-02 | 9.51E-02 |
| GPR139  | 0.095084 | 3.10E-02 | 4.77E-02 |
| GPR141  | 0.076552 | 8.26E-02 | 1.16E-01 |
| GPR142  | 0.031989 | 4.69E-01 | 5.35E-01 |
| GPR143  | -0.13568 | 2.03E-03 | 3.88E-03 |
| GPR144  | 0.10198  | 2.06E-02 | 3.29E-02 |
| GPR146  | -0.44697 | 1.16E-26 | 2.33E-25 |
| GPR148  | -0.01757 | 6.91E-01 | 7.40E-01 |
| GPR149  | -0.00979 | 8.25E-01 | 8.55E-01 |
| GPR150  | 0.048312 | 2.74E-01 | 3.36E-01 |
| GPR151  | -0.05749 | 1.93E-01 | 2.47E-01 |
| GPR152  | 0.071786 | 1.04E-01 | 1.42E-01 |
| GPR153  | -0.05535 | 2.10E-01 | 2.66E-01 |
| GPR155  | -0.06269 | 1.55E-01 | 2.04E-01 |
| GPR156  | 0.157207 | 3.42E-04 | 7.37E-04 |
| GPR157  | 0.13736  | 1.78E-03 | 3.44E-03 |
| GPR158  | 0.202632 | 3.56E-06 | 1.01E-05 |
| GPR15   | 0.134576 | 2.21E-03 | 4.20E-03 |
| GPR160  | -0.35226 | 1.72E-16 | 1.45E-15 |
| GPR161  | 0.20459  | 2.85E-06 | 8.18E-06 |
| GPR162  | -0.25706 | 3.23E-09 | 1.30E-08 |
| GPR171  | -0.12208 | 5.54E-03 | 9.86E-03 |
| GPR172A | 0.186432 | 2.06E-05 | 5.29E-05 |
| GPR172B | -0.30683 | 1.09E-12 | 6.36E-12 |
| GPR173  | -0.02223 | 6.15E-01 | 6.71E-01 |
| GPR174  | -0.04116 | 3.51E-01 | 4.17E-01 |
| GPR176  | 0.203008 | 3.41E-06 | 9.72E-06 |
| GPR179  | -0.08541 | 5.27E-02 | 7.74E-02 |
| GPR17   | -0.31346 | 3.33E-13 | 2.05E-12 |
| GPR180  | 0.415748 | 6.09E-23 | 9.07E-22 |
| GPR182  | -0.17476 | 6.69E-05 | 1.60E-04 |
| GPR183  | -0.04776 | 2.79E-01 | 3.41E-01 |
| GPR18   | -0.07303 | 9.78E-02 | 1.35E-01 |
| GPR19   | 0.633274 | 4.44E-59 | 3.74E-57 |
| GPR1    | 0.235698 | 6.22E-08 | 2.17E-07 |
| GPR20   | -0.29327 | 1.13E-11 | 5.92E-11 |
| GPR21   | -0.05508 | 2.12E-01 | 2.68E-01 |

|         |          |          |          |
|---------|----------|----------|----------|
| GPR22   | 0.080003 | 6.97E-02 | 9.98E-02 |
| GPR25   | -0.13011 | 3.10E-03 | 5.75E-03 |
| GPR26   | 0.059952 | 1.74E-01 | 2.26E-01 |
| GPR27   | -0.04866 | 2.70E-01 | 3.32E-01 |
| GPR31   | -0.07844 | 7.53E-02 | 1.07E-01 |
| GPR32   | 0.106232 | 1.59E-02 | 2.60E-02 |
| GPR34   | -0.13824 | 1.66E-03 | 3.23E-03 |
| GPR35   | 0.151996 | 5.38E-04 | 1.12E-03 |
| GPR37L1 | 0.308576 | 8.00E-13 | 4.75E-12 |
| GPR37   | 0.252293 | 6.41E-09 | 2.50E-08 |
| GPR39   | -0.3298  | 1.56E-14 | 1.09E-13 |
| GPR3    | 0.194042 | 9.21E-06 | 2.48E-05 |
| GPR44   | -0.4578  | 4.82E-28 | 1.08E-26 |
| GPR45   | 0.044813 | 3.10E-01 | 3.74E-01 |
| GPR4    | 0.070276 | 1.11E-01 | 1.51E-01 |
| GPR50   | 0.125921 | 4.21E-03 | 7.65E-03 |
| GPR52   | 0.016001 | 7.17E-01 | 7.64E-01 |
| GPR55   | -0.21169 | 1.25E-06 | 3.74E-06 |
| GPR56   | -0.12437 | 4.71E-03 | 8.49E-03 |
| GPR61   | 0.093246 | 3.44E-02 | 5.24E-02 |
| GPR62   | -0.05138 | 2.44E-01 | 3.05E-01 |
| GPR63   | 0.212348 | 1.16E-06 | 3.48E-06 |
| GPR64   | -0.23892 | 4.05E-08 | 1.44E-07 |
| GPR65   | -0.05674 | 1.99E-01 | 2.53E-01 |
| GPR68   | -0.05899 | 1.81E-01 | 2.34E-01 |
| GPR6    | 0.078974 | 7.34E-02 | 1.05E-01 |
| GPR75   | -0.04878 | 2.69E-01 | 3.31E-01 |
| GPR77   | -0.13955 | 1.50E-03 | 2.93E-03 |
| GPR78   | 0.223997 | 2.80E-07 | 9.11E-07 |
| GPR81   | -0.03141 | 4.77E-01 | 5.42E-01 |
| GPR82   | -0.06848 | 1.21E-01 | 1.63E-01 |
| GPR83   | 0.064273 | 1.45E-01 | 1.92E-01 |
| GPR84   | 0.203312 | 3.30E-06 | 9.40E-06 |
| GPR85   | -0.15784 | 3.23E-04 | 7.00E-04 |
| GPR87   | 0.245252 | 1.72E-08 | 6.36E-08 |
| GPR88   | -0.04847 | 2.72E-01 | 3.34E-01 |
| GPR89A  | 0.150843 | 5.94E-04 | 1.23E-03 |
| GPR89B  | 0.059384 | 1.78E-01 | 2.31E-01 |
| GPR89C  | 0.040396 | 3.60E-01 | 4.26E-01 |
| GPR97   | 0.333492 | 7.64E-15 | 5.48E-14 |
| GPR98   | -0.30978 | 6.46E-13 | 3.87E-12 |
| GPRASP1 | -0.44806 | 8.49E-27 | 1.72E-25 |
| GPRASP2 | -0.26612 | 8.49E-10 | 3.66E-09 |
| GPRC5A  | -0.2406  | 3.23E-08 | 1.16E-07 |



|         |          |          |          |
|---------|----------|----------|----------|
| GPRC5B  | -0.02876 | 5.15E-01 | 5.79E-01 |
| GPRC5C  | -0.47584 | 1.85E-30 | 4.89E-29 |
| GPRC5D  | -0.06752 | 1.26E-01 | 1.69E-01 |
| GPRC6A  | 0.030117 | 4.95E-01 | 5.60E-01 |
| GPRIN1  | 0.451007 | 3.60E-27 | 7.53E-26 |
| GPRIN2  | -0.20802 | 1.92E-06 | 5.63E-06 |
| GPRIN3  | 0.05771  | 1.91E-01 | 2.45E-01 |
| GPS1    | 0.238551 | 4.26E-08 | 1.51E-07 |
| GPS2    | -0.08076 | 6.71E-02 | 9.65E-02 |
| GPSM1   | -0.04241 | 3.37E-01 | 4.02E-01 |
| GPSM2   | 0.462944 | 1.02E-28 | 2.40E-27 |
| GPSM3   | -0.32765 | 2.37E-14 | 1.62E-13 |
| GPT2    | 0.026796 | 5.44E-01 | 6.06E-01 |
| GPT     | -0.13887 | 1.58E-03 | 3.08E-03 |
| GPX1    | -0.01215 | 7.83E-01 | 8.20E-01 |
| GPX2    | 0.003513 | 9.37E-01 | 9.50E-01 |
| GPX3    | -0.25535 | 4.14E-09 | 1.65E-08 |
| GPX4    | -0.11862 | 7.04E-03 | 1.23E-02 |
| GPX5    | -0.04305 | 3.30E-01 | 3.95E-01 |
| GPX6    | 0.046976 | 2.87E-01 | 3.50E-01 |
| GPX7    | 0.193689 | 9.56E-06 | 2.57E-05 |
| GPX8    | 0.330572 | 1.35E-14 | 9.45E-14 |
| GRAMD1A | -0.05557 | 2.08E-01 | 2.64E-01 |
| GRAMD1B | 0.148956 | 6.96E-04 | 1.43E-03 |
| GRAMD1C | -0.03346 | 4.49E-01 | 5.15E-01 |
| GRAMD2  | -0.46386 | 7.71E-29 | 1.83E-27 |
| GRAMD3  | -0.22386 | 2.85E-07 | 9.26E-07 |
| GRAMD4  | -0.19808 | 5.92E-06 | 1.63E-05 |
| GRAP2   | -0.1149  | 9.06E-03 | 1.55E-02 |
| GRAPL   | -0.20935 | 1.65E-06 | 4.86E-06 |
| GRAP    | -0.18091 | 3.63E-05 | 9.01E-05 |
| GRASP   | -0.27153 | 3.73E-10 | 1.68E-09 |
| GRB10   | 0.110692 | 1.19E-02 | 2.00E-02 |
| GRB14   | -0.0346  | 4.33E-01 | 5.00E-01 |
| GRB2    | 0.215926 | 7.55E-07 | 2.32E-06 |
| GRB7    | -0.11167 | 1.12E-02 | 1.89E-02 |
| GREB1L  | 0.416245 | 5.35E-23 | 8.01E-22 |
| GREB1   | -0.26389 | 1.18E-09 | 5.02E-09 |
| GREM1   | 0.429584 | 1.53E-24 | 2.60E-23 |
| GREM2   | -0.23444 | 7.34E-08 | 2.54E-07 |
| GRHL1   | 0.019144 | 6.65E-01 | 7.17E-01 |
| GRHL2   | -0.09491 | 3.13E-02 | 4.81E-02 |
| GRHL3   | 0.04637  | 2.94E-01 | 3.56E-01 |
| GRHPR   | 0.07205  | 1.02E-01 | 1.41E-01 |

|         |          |          |          |
|---------|----------|----------|----------|
| GRIA1   | -0.48979 | 1.99E-32 | 5.95E-31 |
| GRIA2   | 0.113511 | 9.94E-03 | 1.69E-02 |
| GRIA3   | -0.09934 | 2.42E-02 | 3.81E-02 |
| GRIA4   | -0.04152 | 3.47E-01 | 4.13E-01 |
| GRID1   | -0.3982  | 5.13E-21 | 6.56E-20 |
| GRID2IP | -0.258   | 2.82E-09 | 1.15E-08 |
| GRID2   | 0.06463  | 1.43E-01 | 1.89E-01 |
| GRIK1   | 0.146795 | 8.34E-04 | 1.70E-03 |
| GRIK2   | -0.04114 | 3.51E-01 | 4.18E-01 |
| GRIK3   | -0.19609 | 7.37E-06 | 2.01E-05 |
| GRIK4   | -0.24808 | 1.16E-08 | 4.38E-08 |
| GRIK5   | 0.136436 | 1.91E-03 | 3.68E-03 |
| GRIN1   | 0.06226  | 1.58E-01 | 2.07E-01 |
| GRIN2A  | -0.28685 | 3.27E-11 | 1.63E-10 |
| GRIN2B  | 0.157658 | 3.29E-04 | 7.10E-04 |
| GRIN2C  | -0.03389 | 4.43E-01 | 5.09E-01 |
| GRIN2D  | 0.273171 | 2.89E-10 | 1.32E-09 |
| GRIN3A  | 0.100641 | 2.24E-02 | 3.55E-02 |
| GRIN3B  | -0.0327  | 4.59E-01 | 5.25E-01 |
| GRINA   | -0.09027 | 4.06E-02 | 6.10E-02 |
| GRINL1A | 0.081384 | 6.50E-02 | 9.37E-02 |
| GRIP1   | -0.03344 | 4.49E-01 | 5.15E-01 |
| GRIP2   | 0.097891 | 2.63E-02 | 4.11E-02 |
| GRIPAP1 | -0.05599 | 2.05E-01 | 2.60E-01 |
| GRK1    | -0.16835 | 1.24E-04 | 2.85E-04 |
| GRK4    | 0.120533 | 6.17E-03 | 1.09E-02 |
| GRK5    | -0.1463  | 8.69E-04 | 1.76E-03 |
| GRK6    | 0.080096 | 6.93E-02 | 9.94E-02 |
| GRK7    | 0.111182 | 1.16E-02 | 1.94E-02 |
| GRLF1   | -0.17391 | 7.27E-05 | 1.73E-04 |
| GRM1    | 0.040748 | 3.56E-01 | 4.22E-01 |
| GRM2    | 0.094804 | 3.15E-02 | 4.84E-02 |
| GRM3    | -0.18477 | 2.45E-05 | 6.22E-05 |
| GRM4    | 0.133635 | 2.37E-03 | 4.49E-03 |
| GRM5    | 0.200796 | 4.38E-06 | 1.23E-05 |
| GRM6    | -0.306   | 1.26E-12 | 7.33E-12 |
| GRM7    | -0.26846 | 5.96E-10 | 2.62E-09 |
| GRM8    | 0.218899 | 5.26E-07 | 1.65E-06 |
| GRN     | -0.19081 | 1.30E-05 | 3.43E-05 |
| GRPEL1  | 0.258695 | 2.55E-09 | 1.04E-08 |
| GRPEL2  | 0.272452 | 3.23E-10 | 1.47E-09 |
| GRPR    | 0.146422 | 8.60E-04 | 1.74E-03 |
| GRP     | -0.11947 | 6.64E-03 | 1.16E-02 |
| GRRP1   | -0.30658 | 1.14E-12 | 6.64E-12 |

|         |          |          |          |
|---------|----------|----------|----------|
| GRSF1   | 0.231524 | 1.07E-07 | 3.66E-07 |
| GRTP1   | -0.13521 | 2.11E-03 | 4.01E-03 |
| GRWD1   | 0.200398 | 4.58E-06 | 1.28E-05 |
| GRXCR1  | -0.03089 | 4.84E-01 | 5.49E-01 |
| GRXCR2  | 0.013103 | 7.67E-01 | 8.06E-01 |
| GSC2    | 0.02685  | 5.43E-01 | 6.05E-01 |
| GSC     | 0.055869 | 2.06E-01 | 2.61E-01 |
| GSDMA   | 0.004873 | 9.12E-01 | 9.30E-01 |
| GSDMB   | -0.13311 | 2.47E-03 | 4.66E-03 |
| GSDMC   | 0.075737 | 8.60E-02 | 1.20E-01 |
| GSDMD   | -0.12738 | 3.79E-03 | 6.93E-03 |
| GSG1L   | -0.25089 | 7.82E-09 | 3.02E-08 |
| GSG1    | 0.117508 | 7.60E-03 | 1.32E-02 |
| GSG2    | 0.754831 | 5.16E-96 | 7.75E-94 |
| GSK3A   | 0.2475   | 1.26E-08 | 4.73E-08 |
| GSK3B   | 0.204758 | 2.80E-06 | 8.03E-06 |
| GSN     | -0.36184 | 2.24E-17 | 2.08E-16 |
| GSPT1   | -0.17613 | 5.85E-05 | 1.41E-04 |
| GSPT2   | -0.22182 | 3.67E-07 | 1.18E-06 |
| GSR     | 0.166714 | 1.44E-04 | 3.28E-04 |
| GSS     | 0.365444 | 1.02E-17 | 9.72E-17 |
| GSTA1   | -0.25251 | 6.22E-09 | 2.43E-08 |
| GSTA2   | -0.1771  | 5.32E-05 | 1.29E-04 |
| GSTA3   | -0.24809 | 1.16E-08 | 4.38E-08 |
| GSTA4   | -0.21938 | 4.96E-07 | 1.56E-06 |
| GSTA5   | -0.1893  | 1.53E-05 | 3.99E-05 |
| GSTCD   | 0.41232  | 1.48E-22 | 2.13E-21 |
| GSTK1   | -0.0426  | 3.35E-01 | 4.00E-01 |
| GSTM1   | -0.02563 | 5.62E-01 | 6.22E-01 |
| GSTM2P1 | -0.06765 | 1.25E-01 | 1.69E-01 |
| GSTM2   | -0.21163 | 1.26E-06 | 3.77E-06 |
| GSTM3   | 0.021457 | 6.27E-01 | 6.83E-01 |
| GSTM4   | -0.11012 | 1.24E-02 | 2.07E-02 |
| GSTM5   | -0.44878 | 6.89E-27 | 1.40E-25 |
| GSTO1   | 0.216125 | 7.37E-07 | 2.27E-06 |
| GSTO2   | 0.005067 | 9.09E-01 | 9.27E-01 |
| GSTP1   | -0.08835 | 4.51E-02 | 6.71E-02 |
| GSTT1   | -0.04725 | 2.85E-01 | 3.47E-01 |
| GSTT2   | -0.04845 | 2.72E-01 | 3.34E-01 |
| GSTTP1  | -0.0087  | 8.44E-01 | 8.72E-01 |
| GSTTP2  | 0.012802 | 7.72E-01 | 8.10E-01 |
| GSTZ1   | 0.043252 | 3.27E-01 | 3.93E-01 |
| GSX2    | 0.099795 | 2.35E-02 | 3.71E-02 |
| GTDC1   | 0.193035 | 1.03E-05 | 2.74E-05 |

|            |          |           |           |
|------------|----------|-----------|-----------|
| GTF2A1L    | 0.063192 | 1.52E-01  | 2.00E-01  |
| GTF2A1     | 0.181265 | 3.51E-05  | 8.70E-05  |
| GTF2A2     | 0.235208 | 6.64E-08  | 2.31E-07  |
| GTF2B      | 0.152859 | 5.00E-04  | 1.05E-03  |
| GTF2E1     | 0.439278 | 1.04E-25  | 1.95E-24  |
| GTF2E2     | 0.31659  | 1.88E-13  | 1.19E-12  |
| GTF2F1     | -0.0186  | 6.74E-01  | 7.25E-01  |
| GTF2F2     | 0.191191 | 1.25E-05  | 3.30E-05  |
| GTF2H1     | 0.154065 | 4.50E-04  | 9.51E-04  |
| GTF2H2B    | -0.00083 | 9.85E-01  | 9.88E-01  |
| GTF2H2C    | -0.03114 | 4.81E-01  | 5.46E-01  |
| GTF2H2     | 0.132548 | 2.58E-03  | 4.85E-03  |
| GTF2H3     | 0.384872 | 1.25E-19  | 1.41E-18  |
| GTF2H4     | 0.220182 | 4.50E-07  | 1.42E-06  |
| GTF2H5     | 0.039106 | 3.76E-01  | 4.42E-01  |
| GTF2IP1    | -0.27172 | 3.62E-10  | 1.63E-09  |
| GTF2IRD1   | 0.186242 | 2.10E-05  | 5.39E-05  |
| GTF2IRD2B  | -0.47513 | 2.32E-30  | 6.10E-29  |
| GTF2IRD2P1 | -0.54634 | 2.07E-41  | 1.01E-39  |
| GTF2IRD2   | -0.51826 | 9.69E-37  | 3.68E-35  |
| GTF2I      | -0.06002 | 1.74E-01  | 2.26E-01  |
| GTF3A      | 0.245896 | 1.57E-08  | 5.85E-08  |
| GTF3C1     | -0.02139 | 6.28E-01  | 6.84E-01  |
| GTF3C2     | 0.386015 | 9.58E-20  | 1.09E-18  |
| GTF3C3     | 0.443278 | 3.36E-26  | 6.56E-25  |
| GTF3C4     | 0.10324  | 1.91E-02  | 3.07E-02  |
| GTF3C5     | 0.250163 | 8.66E-09  | 3.33E-08  |
| GTF3C6     | 0.281799 | 7.42E-11  | 3.57E-10  |
| GTPBP10    | 0.312561 | 3.91E-13  | 2.40E-12  |
| GTPBP1     | -0.19826 | 5.80E-06  | 1.60E-05  |
| GTPBP2     | 0.176857 | 5.45E-05  | 1.32E-04  |
| GTPBP3     | 0.097983 | 2.62E-02  | 4.09E-02  |
| GTPBP4     | 0.378554 | 5.42E-19  | 5.75E-18  |
| GTPBP5     | -0.02348 | 5.95E-01  | 6.53E-01  |
| GTPBP8     | 0.347321 | 4.78E-16  | 3.87E-15  |
| GTSE1      | 0.863002 | 3.07E-154 | 2.12E-151 |
| GTSF1L     | 0.042644 | 3.34E-01  | 4.00E-01  |
| GTSF1      | 0.153293 | 4.81E-04  | 1.01E-03  |
| GUCA1A     | 0.446742 | 1.24E-26  | 2.48E-25  |
| GUCA1B     | 0.12038  | 6.23E-03  | 1.10E-02  |
| GUCA1C     | 0.067198 | 1.28E-01  | 1.72E-01  |
| GUCA2A     | -0.07278 | 9.90E-02  | 1.36E-01  |
| GUCA2B     | 0.111791 | 1.11E-02  | 1.87E-02  |
| GUCY1A2    | -0.22226 | 3.48E-07  | 1.12E-06  |

|         |          |          |          |
|---------|----------|----------|----------|
| GUCY1A3 | -0.34415 | 9.14E-16 | 7.20E-15 |
| GUCY1B2 | -0.22657 | 2.03E-07 | 6.69E-07 |
| GUCY1B3 | -0.14768 | 7.74E-04 | 1.58E-03 |
| GUCY2C  | 0.095944 | 2.95E-02 | 4.56E-02 |
| GUCY2D  | -0.28376 | 5.41E-11 | 2.63E-10 |
| GUCY2E  | 0.02581  | 5.59E-01 | 6.20E-01 |
| GUCY2F  | -0.15782 | 3.24E-04 | 7.01E-04 |
| GUCY2GP | -0.07488 | 8.96E-02 | 1.25E-01 |
| GUF1    | 0.171955 | 8.78E-05 | 2.06E-04 |
| GUK1    | -0.02167 | 6.24E-01 | 6.80E-01 |
| GULP1   | 0.049824 | 2.59E-01 | 3.20E-01 |
| GUSBL1  | -0.09604 | 2.93E-02 | 4.54E-02 |
| GUSBL2  | -0.08226 | 6.21E-02 | 8.99E-02 |
| GUSBP1  | -0.02955 | 5.03E-01 | 5.68E-01 |
| GUSBP3  | -0.04761 | 2.81E-01 | 3.43E-01 |
| GUSB    | -0.1433  | 1.11E-03 | 2.21E-03 |
| GVIN1   | -0.16106 | 2.43E-04 | 5.35E-04 |
| GXYLT1  | 0.114022 | 9.61E-03 | 1.64E-02 |
| GXYLT2  | 0.020895 | 6.36E-01 | 6.91E-01 |
| GYG1    | 0.342101 | 1.38E-15 | 1.06E-14 |
| GYG2    | -0.12909 | 3.34E-03 | 6.17E-03 |
| GYLTL1B | -0.10499 | 1.72E-02 | 2.79E-02 |
| GYP A   | -0.09122 | 3.85E-02 | 5.81E-02 |
| GYPB    | -0.17957 | 4.16E-05 | 1.02E-04 |
| GYP C   | -0.24355 | 2.17E-08 | 7.94E-08 |
| GYP E   | -0.26594 | 8.72E-10 | 3.75E-09 |
| GYS1    | 0.033441 | 4.49E-01 | 5.15E-01 |
| GYS2    | 0.118928 | 6.89E-03 | 1.20E-02 |
| GZF1    | -0.07749 | 7.89E-02 | 1.12E-01 |
| GZMA    | 0.178106 | 4.81E-05 | 1.17E-04 |
| GZMB    | 0.385123 | 1.18E-19 | 1.33E-18 |
| GZMH    | 0.125948 | 4.20E-03 | 7.64E-03 |
| GZMK    | -0.02039 | 6.44E-01 | 6.99E-01 |
| GZMM    | 0.00501  | 9.10E-01 | 9.28E-01 |
| H19     | 0.148981 | 6.95E-04 | 1.43E-03 |
| H1F0    | 0.147128 | 8.11E-04 | 1.65E-03 |
| H1FNT   | -0.30783 | 9.14E-13 | 5.39E-12 |
| H1FOO   | 0.040454 | 3.60E-01 | 4.26E-01 |
| H1FX    | 0.129986 | 3.12E-03 | 5.80E-03 |
| H2AFB1  | 0.102459 | 2.00E-02 | 3.21E-02 |
| H2AFJ   | 0.135    | 2.14E-03 | 4.07E-03 |
| H2AFV   | 0.291904 | 1.42E-11 | 7.36E-11 |
| H2AFX   | 0.618086 | 1.37E-55 | 1.05E-53 |
| H2AFY2  | 0.049355 | 2.64E-01 | 3.25E-01 |

|        |          |          |          |
|--------|----------|----------|----------|
| H2AFY  | 0.308382 | 8.28E-13 | 4.91E-12 |
| H2AFZ  | 0.725516 | 2.72E-85 | 3.46E-83 |
| H2BFM  | 0.050963 | 2.48E-01 | 3.09E-01 |
| H2BFWT | 0.113758 | 9.77E-03 | 1.66E-02 |
| H2BFXP | 0.04761  | 2.81E-01 | 3.43E-01 |
| H3F3A  | -0.08997 | 4.13E-02 | 6.19E-02 |
| H3F3B  | 0.088203 | 4.54E-02 | 6.76E-02 |
| H3F3C  | 0.085361 | 5.29E-02 | 7.75E-02 |
| H6PD   | -0.26985 | 4.82E-10 | 2.14E-09 |
| HAAO   | -0.16754 | 1.33E-04 | 3.05E-04 |
| HABP2  | -0.36245 | 1.97E-17 | 1.83E-16 |
| HABP4  | -0.14378 | 1.07E-03 | 2.13E-03 |
| HACE1  | 0.077458 | 7.91E-02 | 1.12E-01 |
| HACL1  | -0.0279  | 5.28E-01 | 5.91E-01 |
| HADHA  | 0.182749 | 3.01E-05 | 7.55E-05 |
| HADHB  | 0.040395 | 3.60E-01 | 4.26E-01 |
| HADH   | -0.24841 | 1.11E-08 | 4.19E-08 |
| HAGHL  | -0.12141 | 5.80E-03 | 1.03E-02 |
| HAGH   | -0.39793 | 5.49E-21 | 6.98E-20 |
| HAL    | 0.03267  | 4.59E-01 | 5.26E-01 |
| HAMP   | 0.119905 | 6.44E-03 | 1.13E-02 |
| HAND1  | -0.16129 | 2.37E-04 | 5.24E-04 |
| HAND2  | 0.01268  | 7.74E-01 | 8.12E-01 |
| HAO1   | -0.03467 | 4.32E-01 | 4.99E-01 |
| HAO2   | -0.07154 | 1.05E-01 | 1.44E-01 |
| HAP1   | 0.163336 | 1.97E-04 | 4.41E-04 |
| HAPLN1 | 0.11894  | 6.89E-03 | 1.20E-02 |
| HAPLN2 | -0.02745 | 5.34E-01 | 5.97E-01 |
| HAPLN3 | 0.297454 | 5.56E-12 | 3.02E-11 |
| HAPLN4 | -0.01802 | 6.83E-01 | 7.33E-01 |
| HAR1A  | -0.22492 | 2.50E-07 | 8.16E-07 |
| HAR1B  | -0.06837 | 1.21E-01 | 1.64E-01 |
| HARBI1 | 0.162559 | 2.12E-04 | 4.71E-04 |
| HARS2  | -0.01275 | 7.73E-01 | 8.11E-01 |
| HARS   | 0.058741 | 1.83E-01 | 2.36E-01 |
| HAS1   | 0.058034 | 1.89E-01 | 2.42E-01 |
| HAS2AS | 0.079178 | 7.26E-02 | 1.04E-01 |
| HAS2   | 0.012717 | 7.73E-01 | 8.12E-01 |
| HAS3   | -0.36656 | 8.00E-18 | 7.67E-17 |
| HAT1   | 0.531438 | 7.06E-39 | 3.06E-37 |
| HAUS1  | 0.411372 | 1.89E-22 | 2.69E-21 |
| HAUS2  | 0.422697 | 9.78E-24 | 1.57E-22 |
| HAUS3  | 0.168415 | 1.23E-04 | 2.83E-04 |
| HAUS4  | -0.12998 | 3.13E-03 | 5.80E-03 |

|         |          |          |          |
|---------|----------|----------|----------|
| HAUS5   | 0.257078 | 3.23E-09 | 1.30E-08 |
| HAUS6   | 0.533794 | 2.86E-39 | 1.27E-37 |
| HAUS7   | 0.311041 | 5.15E-13 | 3.12E-12 |
| HAUS8   | 0.390429 | 3.36E-20 | 4.00E-19 |
| HAVCR1  | -0.01419 | 7.48E-01 | 7.90E-01 |
| HAVCR2  | 0.076375 | 8.34E-02 | 1.17E-01 |
| HAX1    | 0.195267 | 8.06E-06 | 2.19E-05 |
| HBA1    | -0.2189  | 5.26E-07 | 1.65E-06 |
| HBA2    | -0.24925 | 9.85E-09 | 3.76E-08 |
| HBBP1   | 0.099689 | 2.37E-02 | 3.74E-02 |
| HBB     | -0.21152 | 1.28E-06 | 3.81E-06 |
| HBD     | 0.027655 | 5.31E-01 | 5.94E-01 |
| HBE1    | 0.179955 | 4.00E-05 | 9.85E-05 |
| HBEGF   | -0.06947 | 1.15E-01 | 1.56E-01 |
| HBG1    | -0.03127 | 4.79E-01 | 5.44E-01 |
| HBG2    | -0.00502 | 9.09E-01 | 9.27E-01 |
| HBM     | -0.10356 | 1.87E-02 | 3.02E-02 |
| HBP1    | -0.21908 | 5.14E-07 | 1.62E-06 |
| HBQ1    | 0.266769 | 7.70E-10 | 3.34E-09 |
| HBS1L   | 0.387783 | 6.31E-20 | 7.31E-19 |
| HBXIP   | 0.015811 | 7.20E-01 | 7.67E-01 |
| HBZ     | -0.18898 | 1.58E-05 | 4.13E-05 |
| HCCS    | 0.365397 | 1.03E-17 | 9.81E-17 |
| HCFC1R1 | -0.1754  | 6.29E-05 | 1.51E-04 |
| HCFC1   | 0.116487 | 8.14E-03 | 1.40E-02 |
| HCFC2   | -0.06275 | 1.55E-01 | 2.04E-01 |
| HCG11   | -0.07854 | 7.49E-02 | 1.07E-01 |
| HCG18   | 0.006242 | 8.88E-01 | 9.09E-01 |
| HCG22   | 0.016567 | 7.08E-01 | 7.55E-01 |
| HCG26   | -0.17363 | 7.47E-05 | 1.77E-04 |
| HCG27   | -0.19616 | 7.31E-06 | 1.99E-05 |
| HCG2P7  | -0.32669 | 2.84E-14 | 1.94E-13 |
| HCG4P6  | -0.15506 | 4.13E-04 | 8.78E-04 |
| HCG4    | -0.03678 | 4.05E-01 | 4.71E-01 |
| HCG9    | -0.00124 | 9.78E-01 | 9.83E-01 |
| HCK     | -0.04244 | 3.36E-01 | 4.02E-01 |
| HCLS1   | -0.10257 | 1.99E-02 | 3.19E-02 |
| HCN1    | -0.26279 | 1.40E-09 | 5.88E-09 |
| HCN2    | 0.236172 | 5.84E-08 | 2.04E-07 |
| HCN3    | 0.109298 | 1.31E-02 | 2.17E-02 |
| HCN4    | -0.30229 | 2.42E-12 | 1.37E-11 |
| HCP5    | 0.105133 | 1.70E-02 | 2.76E-02 |
| HCRTR1  | -0.08021 | 6.89E-02 | 9.89E-02 |
| HCRTR2  | -0.10099 | 2.19E-02 | 3.48E-02 |

|          |          |          |          |
|----------|----------|----------|----------|
| HCRT     | 0.047147 | 2.86E-01 | 3.48E-01 |
| HCST     | -0.06416 | 1.46E-01 | 1.93E-01 |
| HDAC10   | -0.27225 | 3.33E-10 | 1.51E-09 |
| HDAC11   | -0.38537 | 1.11E-19 | 1.26E-18 |
| HDAC1    | 0.289732 | 2.04E-11 | 1.04E-10 |
| HDAC2    | 0.529839 | 1.30E-38 | 5.51E-37 |
| HDAC3    | -0.04436 | 3.15E-01 | 3.79E-01 |
| HDAC4    | -0.03017 | 4.94E-01 | 5.59E-01 |
| HDAC5    | -0.3921  | 2.26E-20 | 2.73E-19 |
| HDAC6    | -0.13709 | 1.82E-03 | 3.51E-03 |
| HDAC7    | -0.2152  | 8.24E-07 | 2.52E-06 |
| HDAC8    | -0.01934 | 6.62E-01 | 7.14E-01 |
| HDAC9    | 0.035726 | 4.18E-01 | 4.85E-01 |
| HDC      | -0.31118 | 5.02E-13 | 3.04E-12 |
| HDDC2    | 0.15459  | 4.30E-04 | 9.12E-04 |
| HDDC3    | 0.019106 | 6.65E-01 | 7.17E-01 |
| HDGFL1   | 0.075858 | 8.55E-02 | 1.20E-01 |
| HDGFRP2  | 0.087976 | 4.60E-02 | 6.84E-02 |
| HDGFRP3  | 0.221363 | 3.89E-07 | 1.24E-06 |
| HDGF     | 0.392046 | 2.28E-20 | 2.76E-19 |
| HDHD1A   | -0.02815 | 5.24E-01 | 5.88E-01 |
| HDHD2    | -0.34419 | 9.08E-16 | 7.15E-15 |
| HDHD3    | -0.04564 | 3.01E-01 | 3.65E-01 |
| HDLBP    | 0.089188 | 4.31E-02 | 6.43E-02 |
| HDX      | 0.131671 | 2.75E-03 | 5.16E-03 |
| HEATR1   | 0.29791  | 5.14E-12 | 2.80E-11 |
| HEATR2   | 0.350479 | 2.49E-16 | 2.07E-15 |
| HEATR3   | 0.137735 | 1.73E-03 | 3.35E-03 |
| HEATR4   | 0.019713 | 6.55E-01 | 7.08E-01 |
| HEATR5A  | 0.074711 | 9.03E-02 | 1.26E-01 |
| HEATR5B  | -0.11462 | 9.23E-03 | 1.58E-02 |
| HEATR6   | 0.163316 | 1.97E-04 | 4.41E-04 |
| HEATR7A  | -0.17465 | 6.76E-05 | 1.62E-04 |
| HEATR7B2 | 0.044226 | 3.16E-01 | 3.81E-01 |
| HEBP1    | -0.15338 | 4.78E-04 | 1.01E-03 |
| HEBP2    | 0.268983 | 5.50E-10 | 2.43E-09 |
| HECA     | -0.1598  | 2.71E-04 | 5.94E-04 |
| HECTD1   | -0.10367 | 1.86E-02 | 3.00E-02 |
| HECTD2   | 0.020929 | 6.36E-01 | 6.91E-01 |
| HECTD3   | -0.14666 | 8.43E-04 | 1.71E-03 |
| HECW1    | -0.01283 | 7.71E-01 | 8.10E-01 |
| HECW2    | -0.26471 | 1.05E-09 | 4.48E-09 |
| HEG1     | -0.12284 | 5.25E-03 | 9.38E-03 |
| HELB     | 0.257406 | 3.08E-09 | 1.24E-08 |



|          |          |           |           |
|----------|----------|-----------|-----------|
| HELLS    | 0.782606 | 1.13E-107 | 2.07E-105 |
| HELQ     | -0.19779 | 6.11E-06  | 1.68E-05  |
| HELT     | -0.07359 | 9.53E-02  | 1.32E-01  |
| HELZ     | -0.12948 | 3.24E-03  | 6.01E-03  |
| HEMGN    | -0.23481 | 7.00E-08  | 2.43E-07  |
| HEMK1    | -0.43153 | 8.99E-25  | 1.56E-23  |
| HEPACAM2 | 0.123736 | 4.92E-03  | 8.86E-03  |
| HEPACAM  | -0.19125 | 1.24E-05  | 3.29E-05  |
| HEPHL1   | 0.112876 | 1.04E-02  | 1.75E-02  |
| HEPH     | -0.0813  | 6.52E-02  | 9.41E-02  |
| HEPN1    | -0.18272 | 3.02E-05  | 7.57E-05  |
| HERC1    | -0.33003 | 1.50E-14  | 1.04E-13  |
| HERC2P2  | -0.1911  | 1.26E-05  | 3.33E-05  |
| HERC2P4  | 0.121352 | 5.83E-03  | 1.03E-02  |
| HERC2    | -0.07247 | 1.00E-01  | 1.38E-01  |
| HERC3    | -0.17489 | 6.61E-05  | 1.58E-04  |
| HERC4    | -0.01289 | 7.70E-01  | 8.09E-01  |
| HERC5    | 0.155728 | 3.89E-04  | 8.32E-04  |
| HERC6    | -0.04582 | 2.99E-01  | 3.63E-01  |
| HERPUD1  | -0.30956 | 6.71E-13  | 4.02E-12  |
| HERPUD2  | 0.115783 | 8.54E-03  | 1.46E-02  |
| HES1     | 0.12325  | 5.10E-03  | 9.14E-03  |
| HES2     | 0.122783 | 5.27E-03  | 9.41E-03  |
| HES3     | 0.078885 | 7.37E-02  | 1.05E-01  |
| HES4     | 0.22341  | 3.01E-07  | 9.76E-07  |
| HES5     | -0.21998 | 4.61E-07  | 1.46E-06  |
| HES6     | 0.175223 | 6.39E-05  | 1.53E-04  |
| HES7     | 0.16179  | 2.27E-04  | 5.03E-04  |
| HESRG    | 0.014221 | 7.47E-01  | 7.90E-01  |
| HESX1    | -0.03346 | 4.49E-01  | 5.15E-01  |
| HEXA     | -0.18125 | 3.51E-05  | 8.71E-05  |
| HEXB     | -0.06546 | 1.38E-01  | 1.84E-01  |
| HEXDC    | -0.26922 | 5.31E-10  | 2.34E-09  |
| HEXIM1   | 0.031772 | 4.72E-01  | 5.38E-01  |
| HEXIM2   | 0.01648  | 7.09E-01  | 7.56E-01  |
| HEY1     | -0.07037 | 1.11E-01  | 1.51E-01  |
| HEY2     | -0.11862 | 7.04E-03  | 1.23E-02  |
| HEYL     | -0.31712 | 1.71E-13  | 1.08E-12  |
| HFE2     | -0.02201 | 6.18E-01  | 6.75E-01  |
| HFE      | -0.03349 | 4.48E-01  | 5.14E-01  |
| HFM1     | -0.07299 | 9.80E-02  | 1.35E-01  |
| HGC6.3   | -0.03925 | 3.74E-01  | 4.40E-01  |
| HGD      | 0.014578 | 7.41E-01  | 7.85E-01  |
| HGFAC    | 0.005332 | 9.04E-01  | 9.22E-01  |

|          |          |          |          |
|----------|----------|----------|----------|
| HGF      | -0.19022 | 1.39E-05 | 3.64E-05 |
| HGSNAT   | -0.28704 | 3.17E-11 | 1.58E-10 |
| HGS      | 0.153031 | 4.92E-04 | 1.03E-03 |
| HHATL    | -0.16524 | 1.65E-04 | 3.73E-04 |
| HHAT     | -0.32104 | 8.25E-14 | 5.39E-13 |
| HHEX     | -0.03112 | 4.81E-01 | 5.46E-01 |
| HHIPL1   | 0.090518 | 4.00E-02 | 6.03E-02 |
| HHIPL2   | 0.221913 | 3.63E-07 | 1.16E-06 |
| HHIP     | -0.26045 | 1.97E-09 | 8.15E-09 |
| HHLA1    | 0.023276 | 5.98E-01 | 6.56E-01 |
| HHLA2    | -0.19027 | 1.38E-05 | 3.62E-05 |
| HHLA3    | -0.0278  | 5.29E-01 | 5.92E-01 |
| HIAT1    | 0.108864 | 1.34E-02 | 2.23E-02 |
| HIATL1   | 0.199393 | 5.12E-06 | 1.43E-05 |
| HIATL2   | -0.0095  | 8.30E-01 | 8.60E-01 |
| HIBADH   | 0.174918 | 6.59E-05 | 1.58E-04 |
| HIBCH    | -0.17277 | 8.12E-05 | 1.92E-04 |
| HIC1     | -0.08734 | 4.76E-02 | 7.04E-02 |
| HIC2     | 0.037898 | 3.91E-01 | 4.57E-01 |
| HIF1AN   | -0.06418 | 1.46E-01 | 1.93E-01 |
| HIF1A    | 0.40898  | 3.47E-22 | 4.86E-21 |
| HIF3A    | -0.27576 | 1.93E-10 | 8.96E-10 |
| HIGD1A   | 0.144515 | 1.01E-03 | 2.02E-03 |
| HIGD1B   | -0.43952 | 9.73E-26 | 1.83E-24 |
| HIGD1C   | -0.04319 | 3.28E-01 | 3.93E-01 |
| HIGD2A   | -0.05911 | 1.80E-01 | 2.33E-01 |
| HIGD2B   | -0.07053 | 1.10E-01 | 1.50E-01 |
| HILS1    | -0.05051 | 2.53E-01 | 3.13E-01 |
| HINFP    | 0.043358 | 3.26E-01 | 3.91E-01 |
| HINT1    | 0.051796 | 2.41E-01 | 3.00E-01 |
| HINT2    | -0.04827 | 2.74E-01 | 3.36E-01 |
| HINT3    | -0.1546  | 4.30E-04 | 9.11E-04 |
| HIP1R    | -0.08443 | 5.55E-02 | 8.11E-02 |
| HIP1     | -0.25883 | 2.50E-09 | 1.02E-08 |
| HIPK1    | -0.15093 | 5.89E-04 | 1.23E-03 |
| HIPK2    | -0.02414 | 5.85E-01 | 6.44E-01 |
| HIPK3    | -0.1468  | 8.33E-04 | 1.69E-03 |
| HIPK4    | 0.06924  | 1.17E-01 | 1.58E-01 |
| HIRA     | 0.004679 | 9.16E-01 | 9.33E-01 |
| HIRIP3   | -0.06497 | 1.41E-01 | 1.87E-01 |
| HIST1H1A | 0.060747 | 1.69E-01 | 2.19E-01 |
| HIST1H1B | 0.426752 | 3.30E-24 | 5.50E-23 |
| HIST1H1C | 0.019802 | 6.54E-01 | 7.07E-01 |
| HIST1H1D | 0.334836 | 5.87E-15 | 4.27E-14 |

|           |          |          |          |
|-----------|----------|----------|----------|
| HIST1H1E  | 0.354715 | 1.03E-16 | 8.87E-16 |
| HIST1H1T  | 0.021768 | 6.22E-01 | 6.78E-01 |
| HIST1H2AA | 0.041077 | 3.52E-01 | 4.18E-01 |
| HIST1H2AB | 0.172126 | 8.64E-05 | 2.03E-04 |
| HIST1H2AC | -0.05606 | 2.04E-01 | 2.60E-01 |
| HIST1H2AD | 0.222706 | 3.29E-07 | 1.06E-06 |
| HIST1H2AE | 0.272963 | 2.99E-10 | 1.36E-09 |
| HIST1H2AG | 0.37056  | 3.30E-18 | 3.28E-17 |
| HIST1H2AH | 0.337947 | 3.18E-15 | 2.36E-14 |
| HIST1H2AJ | 0.338761 | 2.70E-15 | 2.02E-14 |
| HIST1H2AK | -0.0153  | 7.29E-01 | 7.74E-01 |
| HIST1H2AL | 0.371809 | 2.50E-18 | 2.51E-17 |
| HIST1H2AM | 0.254645 | 4.58E-09 | 1.82E-08 |
| HIST1H2BA | 0.016052 | 7.16E-01 | 7.63E-01 |
| HIST1H2BB | 0.139441 | 1.51E-03 | 2.95E-03 |
| HIST1H2BC | 0.081567 | 6.44E-02 | 9.29E-02 |
| HIST1H2BD | 0.096184 | 2.91E-02 | 4.50E-02 |
| HIST1H2BE | 0.119986 | 6.41E-03 | 1.13E-02 |
| HIST1H2BF | 0.301868 | 2.60E-12 | 1.47E-11 |
| HIST1H2BG | 0.272601 | 3.16E-10 | 1.43E-09 |
| HIST1H2BH | 0.35785  | 5.28E-17 | 4.72E-16 |
| HIST1H2BI | 0.157044 | 3.47E-04 | 7.47E-04 |
| HIST1H2BJ | 0.386429 | 8.69E-20 | 9.94E-19 |
| HIST1H2BK | 0.08534  | 5.29E-02 | 7.76E-02 |
| HIST1H2BL | 0.256585 | 3.47E-09 | 1.39E-08 |
| HIST1H2BM | 0.150998 | 5.86E-04 | 1.22E-03 |
| HIST1H2BN | 0.062351 | 1.58E-01 | 2.07E-01 |
| HIST1H2BO | 0.452483 | 2.34E-27 | 4.98E-26 |
| HIST1H3A  | 0.151461 | 5.63E-04 | 1.17E-03 |
| HIST1H3B  | 0.467612 | 2.44E-29 | 6.00E-28 |
| HIST1H3C  | 0.341408 | 1.59E-15 | 1.21E-14 |
| HIST1H3D  | 0.277833 | 1.39E-10 | 6.55E-10 |
| HIST1H3E  | 0.040987 | 3.53E-01 | 4.19E-01 |
| HIST1H3F  | 0.340109 | 2.06E-15 | 1.56E-14 |
| HIST1H3G  | 0.282193 | 6.96E-11 | 3.36E-10 |
| HIST1H3H  | 0.233107 | 8.74E-08 | 3.00E-07 |
| HIST1H3I  | 0.291444 | 1.53E-11 | 7.92E-11 |
| HIST1H3J  | 0.259193 | 2.37E-09 | 9.71E-09 |
| HIST1H4A  | 0.191145 | 1.26E-05 | 3.32E-05 |
| HIST1H4B  | 0.226462 | 2.05E-07 | 6.78E-07 |
| HIST1H4C  | 0.218087 | 5.81E-07 | 1.81E-06 |
| HIST1H4D  | 0.188435 | 1.67E-05 | 4.35E-05 |
| HIST1H4E  | 0.175784 | 6.05E-05 | 1.46E-04 |
| HIST1H4F  | 0.045524 | 3.02E-01 | 3.66E-01 |

|            |          |           |           |
|------------|----------|-----------|-----------|
| HIST1H4G   | 0.031207 | 4.80E-01  | 5.45E-01  |
| HIST1H4H   | -0.00929 | 8.33E-01  | 8.63E-01  |
| HIST1H4I   | 0.172706 | 8.17E-05  | 1.93E-04  |
| HIST1H4J   | 0.127971 | 3.63E-03  | 6.66E-03  |
| HIST1H4K   | 0.105975 | 1.61E-02  | 2.64E-02  |
| HIST1H4L   | 0.185364 | 2.30E-05  | 5.88E-05  |
| HIST2H2AA3 | 0.143375 | 1.10E-03  | 2.20E-03  |
| HIST2H2AB  | 0.270555 | 4.33E-10  | 1.93E-09  |
| HIST2H2AC  | 0.335916 | 4.75E-15  | 3.49E-14  |
| HIST2H2BA  | 0.072627 | 9.97E-02  | 1.37E-01  |
| HIST2H2BE  | 0.053302 | 2.27E-01  | 2.85E-01  |
| HIST2H2BF  | 0.149604 | 6.59E-04  | 1.36E-03  |
| HIST2H3C   | 0.285143 | 4.32E-11  | 2.12E-10  |
| HIST2H3D   | 0.19942  | 5.10E-06  | 1.42E-05  |
| HIST2H4A   | 0.185525 | 2.27E-05  | 5.78E-05  |
| HIST3H2A   | 0.056618 | 2.00E-01  | 2.54E-01  |
| HIST3H2BB  | 0.037217 | 3.99E-01  | 4.66E-01  |
| HIST3H3    | -0.08703 | 4.84E-02  | 7.15E-02  |
| HIST4H4    | -0.08222 | 6.22E-02  | 9.01E-02  |
| HIVEP1     | -0.13647 | 1.91E-03  | 3.67E-03  |
| HIVEP2     | -0.01418 | 7.48E-01  | 7.90E-01  |
| HIVEP3     | -0.01088 | 8.05E-01  | 8.39E-01  |
| HJURP      | 0.882976 | 1.29E-170 | 2.34E-167 |
| HK1        | -0.07856 | 7.49E-02  | 1.07E-01  |
| HK2        | 0.355197 | 9.27E-17  | 8.06E-16  |
| HK3        | 0.030323 | 4.92E-01  | 5.57E-01  |
| HKDC1      | -0.17683 | 5.46E-05  | 1.32E-04  |
| HKR1       | -0.20097 | 4.30E-06  | 1.21E-05  |
| HLA-A      | 0.002755 | 9.50E-01  | 9.61E-01  |
| HLA-B      | -0.0174  | 6.94E-01  | 7.43E-01  |
| HLA-C      | -0.00738 | 8.67E-01  | 8.92E-01  |
| HLA-DMA    | -0.39535 | 1.03E-20  | 1.28E-19  |
| HLA-DMB    | -0.18885 | 1.60E-05  | 4.18E-05  |
| HLA-DOA    | -0.27159 | 3.69E-10  | 1.66E-09  |
| HLA-DOB    | -0.22607 | 2.16E-07  | 7.11E-07  |
| HLA-DPA1   | -0.27272 | 3.10E-10  | 1.41E-09  |
| HLA-DPB1   | -0.3313  | 1.17E-14  | 8.27E-14  |
| HLA-DPB2   | -0.12618 | 4.13E-03  | 7.52E-03  |
| HLA-DQA1   | -0.16755 | 1.33E-04  | 3.05E-04  |
| HLA-DQA2   | -0.14838 | 7.31E-04  | 1.50E-03  |
| HLA-DQB1   | -0.27017 | 4.59E-10  | 2.04E-09  |
| HLA-DQB2   | -0.39408 | 1.40E-20  | 1.72E-19  |
| HLA-DRA    | -0.25092 | 7.78E-09  | 3.00E-08  |
| HLA-DRB1   | -0.30677 | 1.10E-12  | 6.43E-12  |

|          |          |           |           |
|----------|----------|-----------|-----------|
| HLA-DRB5 | -0.30607 | 1.25E-12  | 7.24E-12  |
| HLA-DRB6 | -0.11561 | 8.64E-03  | 1.48E-02  |
| HLA-E    | -0.17004 | 1.05E-04  | 2.45E-04  |
| HLA-F    | -0.07365 | 9.50E-02  | 1.32E-01  |
| HLA-G    | 0.030523 | 4.89E-01  | 5.54E-01  |
| HLA-H    | 0.031583 | 4.75E-01  | 5.40E-01  |
| HLA-J    | -0.19908 | 5.30E-06  | 1.47E-05  |
| HLA-L    | -0.09029 | 4.05E-02  | 6.10E-02  |
| HLCS     | -0.08499 | 5.39E-02  | 7.89E-02  |
| HLF      | -0.53437 | 2.29E-39  | 1.03E-37  |
| HLTF     | 0.455325 | 1.01E-27  | 2.21E-26  |
| HLX      | -0.20293 | 3.44E-06  | 9.80E-06  |
| HM13     | 0.099644 | 2.37E-02  | 3.74E-02  |
| HMBOX1   | 0.01496  | 7.35E-01  | 7.79E-01  |
| HMBS     | 0.307633 | 9.46E-13  | 5.57E-12  |
| HMCN1    | -0.3792  | 4.67E-19  | 4.99E-18  |
| HMG20A   | -0.15943 | 2.81E-04  | 6.13E-04  |
| HMG20B   | 0.106361 | 1.57E-02  | 2.58E-02  |
| HMGA1    | 0.57544  | 9.66E-47  | 6.03E-45  |
| HMGA2    | 0.311309 | 4.90E-13  | 2.98E-12  |
| HMGB1    | 0.186345 | 2.08E-05  | 5.34E-05  |
| HMGB2    | 0.643375 | 1.64E-61  | 1.48E-59  |
| HMGB3L1  | 0.093308 | 3.43E-02  | 5.23E-02  |
| HMGB3    | 0.184436 | 2.54E-05  | 6.42E-05  |
| HMGB4    | -0.00301 | 9.46E-01  | 9.57E-01  |
| HMGCLL1  | -0.33027 | 1.43E-14  | 1.00E-13  |
| HMGCL    | -0.27099 | 4.05E-10  | 1.81E-09  |
| HMGCR    | 0.179725 | 4.09E-05  | 1.01E-04  |
| HMGCS1   | 0.24608  | 1.53E-08  | 5.71E-08  |
| HMGCS2   | -0.34055 | 1.89E-15  | 1.43E-14  |
| HMGN1    | 0.18115  | 3.55E-05  | 8.79E-05  |
| HMGN2    | 0.297347 | 5.66E-12  | 3.07E-11  |
| HMGN3    | -0.35928 | 3.89E-17  | 3.53E-16  |
| HMGN4    | 0.286587 | 3.42E-11  | 1.70E-10  |
| HMGN5    | -0.09911 | 2.45E-02  | 3.85E-02  |
| HMGXB3   | 0.037373 | 3.97E-01  | 4.64E-01  |
| HMGXB4   | 0.450116 | 4.67E-27  | 9.64E-26  |
| HMHA1    | -0.272   | 3.47E-10  | 1.56E-09  |
| HMHB1    | 0.046444 | 2.93E-01  | 3.56E-01  |
| HMMR     | 0.841918 | 1.50E-139 | 5.77E-137 |
| HMOX1    | 0.063482 | 1.50E-01  | 1.98E-01  |
| HMOX2    | -0.17659 | 5.59E-05  | 1.35E-04  |
| HMP19    | 0.023931 | 5.88E-01  | 6.46E-01  |
| HMSD     | 0.18061  | 3.74E-05  | 9.26E-05  |

|           |          |          |          |
|-----------|----------|----------|----------|
| HMX1      | 0.088527 | 4.46E-02 | 6.65E-02 |
| HMX2      | 0.31969  | 1.06E-13 | 6.84E-13 |
| HMX3      | 0.052596 | 2.33E-01 | 2.92E-01 |
| HN1L      | 0.109661 | 1.28E-02 | 2.13E-02 |
| HN1       | 0.400352 | 3.02E-21 | 3.93E-20 |
| HNF1A     | 0.066016 | 1.35E-01 | 1.80E-01 |
| HNF1B     | -0.43274 | 6.45E-25 | 1.12E-23 |
| HNF4A     | 0.081169 | 6.57E-02 | 9.47E-02 |
| HNF4G     | 0.137453 | 1.77E-03 | 3.42E-03 |
| HNMT      | -0.41355 | 1.08E-22 | 1.57E-21 |
| HNRNPA0   | 0.018296 | 6.79E-01 | 7.29E-01 |
| HNRNPA1L2 | 0.165699 | 1.59E-04 | 3.59E-04 |
| HNRNPA1   | 0.102435 | 2.01E-02 | 3.21E-02 |
| HNRNPA2B1 | 0.293378 | 1.11E-11 | 5.81E-11 |
| HNRNPA3P1 | 0.296989 | 6.02E-12 | 3.26E-11 |
| HNRNPA3   | 0.156465 | 3.65E-04 | 7.84E-04 |
| HNRNPAB   | 0.322178 | 6.66E-14 | 4.39E-13 |
| HNRNPCL1  | -0.01652 | 7.08E-01 | 7.56E-01 |
| HNRNPC    | 0.411796 | 1.69E-22 | 2.43E-21 |
| HNRNPD    | 0.307217 | 1.02E-12 | 5.97E-12 |
| HNRNPF    | 0.317188 | 1.68E-13 | 1.07E-12 |
| HNRNPH1   | -0.02205 | 6.18E-01 | 6.74E-01 |
| HNRNPH2   | -0.11672 | 8.02E-03 | 1.38E-02 |
| HNRNPH3   | 0.153795 | 4.61E-04 | 9.72E-04 |
| HNRNPK    | 0.282399 | 6.74E-11 | 3.26E-10 |
| HNRNPL    | 0.458622 | 3.77E-28 | 8.49E-27 |
| HNRNPM    | 0.226524 | 2.04E-07 | 6.73E-07 |
| HNRNPR    | 0.430685 | 1.13E-24 | 1.94E-23 |
| HNRNPUL1  | 0.128512 | 3.48E-03 | 6.42E-03 |
| HNRNPUL2  | 0.03766  | 3.94E-01 | 4.61E-01 |
| HNRNPU    | 0.120444 | 6.21E-03 | 1.10E-02 |
| HNRPDL    | -0.13877 | 1.59E-03 | 3.10E-03 |
| HNRPLL    | 0.383223 | 1.84E-19 | 2.06E-18 |
| HOMER1    | 0.410897 | 2.13E-22 | 3.02E-21 |
| HOMER2    | -0.20512 | 2.68E-06 | 7.72E-06 |
| HOMER3    | 0.205803 | 2.48E-06 | 7.16E-06 |
| HOMEZ     | -0.12083 | 6.04E-03 | 1.07E-02 |
| HOOK1     | 0.073995 | 9.35E-02 | 1.30E-01 |
| HOOK2     | -0.23917 | 3.92E-08 | 1.40E-07 |
| HOOK3     | -0.16635 | 1.49E-04 | 3.39E-04 |
| HOPX      | -0.49844 | 1.07E-33 | 3.42E-32 |
| HORMAD1   | 0.038827 | 3.79E-01 | 4.46E-01 |
| HORMAD2   | 0.035547 | 4.21E-01 | 4.87E-01 |
| HOTAIR    | 0.021309 | 6.29E-01 | 6.85E-01 |

|          |          |          |          |
|----------|----------|----------|----------|
| HOXA10   | 0.265334 | 9.55E-10 | 4.09E-09 |
| HOXA11AS | 0.32234  | 6.46E-14 | 4.27E-13 |
| HOXA11   | 0.369635 | 4.06E-18 | 3.99E-17 |
| HOXA13   | 0.283338 | 5.79E-11 | 2.81E-10 |
| HOXA1    | 0.343439 | 1.06E-15 | 8.23E-15 |
| HOXA2    | -0.02138 | 6.28E-01 | 6.84E-01 |
| HOXA3    | 0.123838 | 4.89E-03 | 8.80E-03 |
| HOXA4    | -0.06284 | 1.54E-01 | 2.03E-01 |
| HOXA5    | -0.1489  | 7.00E-04 | 1.44E-03 |
| HOXA6    | 0.072982 | 9.80E-02 | 1.35E-01 |
| HOXA7    | -0.07087 | 1.08E-01 | 1.48E-01 |
| HOXA9    | 0.236406 | 5.67E-08 | 1.98E-07 |
| HOXB13   | 0.176329 | 5.74E-05 | 1.39E-04 |
| HOXB1    | 0.057359 | 1.94E-01 | 2.48E-01 |
| HOXB2    | 0.070597 | 1.10E-01 | 1.49E-01 |
| HOXB3    | 0.020703 | 6.39E-01 | 6.94E-01 |
| HOXB4    | 0.046625 | 2.91E-01 | 3.54E-01 |
| HOXB5    | 0.0734   | 9.61E-02 | 1.33E-01 |
| HOXB6    | 0.137269 | 1.79E-03 | 3.46E-03 |
| HOXB7    | 0.226814 | 1.96E-07 | 6.50E-07 |
| HOXB8    | 0.196179 | 7.30E-06 | 1.99E-05 |
| HOXB9    | 0.308042 | 8.80E-13 | 5.20E-12 |
| HOXC10   | 0.080293 | 6.87E-02 | 9.85E-02 |
| HOXC11   | 0.058472 | 1.85E-01 | 2.38E-01 |
| HOXC12   | 0.148839 | 7.03E-04 | 1.45E-03 |
| HOXC13   | 0.025073 | 5.70E-01 | 6.30E-01 |
| HOXC4    | 0.129188 | 3.31E-03 | 6.13E-03 |
| HOXC5    | 0.070589 | 1.10E-01 | 1.49E-01 |
| HOXC6    | 0.216253 | 7.26E-07 | 2.24E-06 |
| HOXC8    | 0.211608 | 1.26E-06 | 3.78E-06 |
| HOXC9    | 0.188745 | 1.62E-05 | 4.22E-05 |
| HOXD10   | 0.204678 | 2.82E-06 | 8.10E-06 |
| HOXD11   | 0.351407 | 2.05E-16 | 1.72E-15 |
| HOXD12   | 0.236084 | 5.91E-08 | 2.07E-07 |
| HOXD13   | 0.350051 | 2.72E-16 | 2.26E-15 |
| HOXD1    | -0.32514 | 3.81E-14 | 2.57E-13 |
| HOXD3    | -0.00963 | 8.27E-01 | 8.58E-01 |
| HOXD4    | -0.03126 | 4.79E-01 | 5.44E-01 |
| HOXD8    | 0.102206 | 2.03E-02 | 3.25E-02 |
| HOXD9    | 0.097999 | 2.62E-02 | 4.09E-02 |
| HP1BP3   | 0.009904 | 8.23E-01 | 8.54E-01 |
| HPCAL1   | -0.12193 | 5.60E-03 | 9.96E-03 |
| HPCAL4   | -0.16389 | 1.87E-04 | 4.20E-04 |
| HPCA     | 0.012854 | 7.71E-01 | 8.10E-01 |

|          |          |          |          |
|----------|----------|----------|----------|
| HPDL     | 0.436804 | 2.09E-25 | 3.81E-24 |
| HPD      | 0.029021 | 5.11E-01 | 5.75E-01 |
| HPGDS    | -0.39803 | 5.34E-21 | 6.82E-20 |
| HPGD     | -0.32262 | 6.13E-14 | 4.06E-13 |
| HPN      | -0.2666  | 7.89E-10 | 3.42E-09 |
| HPRT1    | 0.555362 | 5.23E-43 | 2.80E-41 |
| HPR      | -0.18031 | 3.86E-05 | 9.53E-05 |
| HPS1     | -0.31061 | 5.56E-13 | 3.35E-12 |
| HPS3     | 0.365473 | 1.02E-17 | 9.66E-17 |
| HPS4     | -0.1078  | 1.44E-02 | 2.37E-02 |
| HPS5     | 0.119242 | 6.75E-03 | 1.18E-02 |
| HPS6     | -0.16427 | 1.81E-04 | 4.06E-04 |
| HPSE2    | -0.46033 | 2.26E-28 | 5.17E-27 |
| HPSE     | 0.1242   | 4.76E-03 | 8.59E-03 |
| HPVC1    | 0.035507 | 4.21E-01 | 4.87E-01 |
| HPX      | -0.07963 | 7.10E-02 | 1.02E-01 |
| HPYR1    | -0.10726 | 1.49E-02 | 2.45E-02 |
| HP       | -0.16929 | 1.13E-04 | 2.62E-04 |
| HRASLS2  | -0.14321 | 1.12E-03 | 2.23E-03 |
| HRASLS5  | -0.18327 | 2.86E-05 | 7.18E-05 |
| HRASLS   | 0.15818  | 3.14E-04 | 6.80E-04 |
| HRAS     | 0.06523  | 1.39E-01 | 1.85E-01 |
| HRCT1    | -0.15482 | 4.21E-04 | 8.95E-04 |
| HRC      | -0.26326 | 1.30E-09 | 5.50E-09 |
| HRG      | 0.159459 | 2.80E-04 | 6.12E-04 |
| HRH1     | 0.040225 | 3.62E-01 | 4.29E-01 |
| HRH2     | 0.080079 | 6.94E-02 | 9.95E-02 |
| HRH3     | 0.145251 | 9.47E-04 | 1.91E-03 |
| HRH4     | -0.22636 | 2.08E-07 | 6.87E-07 |
| HRK      | 0.091276 | 3.84E-02 | 5.80E-02 |
| HRNBP3   | -0.0452  | 3.06E-01 | 3.70E-01 |
| HRNR     | -0.00587 | 8.94E-01 | 9.14E-01 |
| HRSP12   | 0.044624 | 3.12E-01 | 3.76E-01 |
| HR       | -0.28645 | 3.50E-11 | 1.73E-10 |
| HS1BP3   | -0.03449 | 4.35E-01 | 5.01E-01 |
| HS2ST1   | 0.315429 | 2.32E-13 | 1.45E-12 |
| HS3ST1   | 0.025607 | 5.62E-01 | 6.23E-01 |
| HS3ST2   | -0.24804 | 1.17E-08 | 4.40E-08 |
| HS3ST3A1 | 0.171844 | 8.87E-05 | 2.08E-04 |
| HS3ST3B1 | 0.022598 | 6.09E-01 | 6.66E-01 |
| HS3ST4   | -0.17633 | 5.74E-05 | 1.39E-04 |
| HS3ST5   | -0.15014 | 6.30E-04 | 1.31E-03 |
| HS3ST6   | -0.0585  | 1.85E-01 | 2.38E-01 |
| HS6ST1   | -0.13744 | 1.77E-03 | 3.42E-03 |



|           |          |          |          |
|-----------|----------|----------|----------|
| HS6ST2    | -0.15318 | 4.86E-04 | 1.02E-03 |
| HS6ST3    | -0.011   | 8.03E-01 | 8.38E-01 |
| HSBP1L1   | -0.06318 | 1.52E-01 | 2.00E-01 |
| HSBP1     | 0.013715 | 7.56E-01 | 7.97E-01 |
| HSCB      | 0.056958 | 1.97E-01 | 2.51E-01 |
| HSD11B1L  | -0.22242 | 3.41E-07 | 1.10E-06 |
| HSD11B1   | 0.088025 | 4.59E-02 | 6.82E-02 |
| HSD11B2   | -0.22785 | 1.72E-07 | 5.72E-07 |
| HSD17B10  | 0.302426 | 2.36E-12 | 1.34E-11 |
| HSD17B11  | -0.35466 | 1.04E-16 | 8.97E-16 |
| HSD17B12  | -0.06441 | 1.44E-01 | 1.91E-01 |
| HSD17B13  | -0.4152  | 7.02E-23 | 1.04E-21 |
| HSD17B14  | 0.00868  | 8.44E-01 | 8.73E-01 |
| HSD17B1   | 0.059945 | 1.74E-01 | 2.26E-01 |
| HSD17B2   | -0.19334 | 9.93E-06 | 2.66E-05 |
| HSD17B3   | -0.09089 | 3.92E-02 | 5.91E-02 |
| HSD17B4   | -0.42675 | 3.30E-24 | 5.50E-23 |
| HSD17B6   | -0.48554 | 8.10E-32 | 2.34E-30 |
| HSD17B7P2 | -0.2245  | 2.63E-07 | 8.58E-07 |
| HSD17B7   | -0.1055  | 1.66E-02 | 2.71E-02 |
| HSD17B8   | -0.28606 | 3.72E-11 | 1.84E-10 |
| HSD3B1    | 0.12104  | 5.95E-03 | 1.05E-02 |
| HSD3B2    | 0.045749 | 3.00E-01 | 3.64E-01 |
| HSD3B7    | 0.116802 | 7.97E-03 | 1.38E-02 |
| HSDL1     | -0.07569 | 8.62E-02 | 1.21E-01 |
| HSDL2     | -0.33861 | 2.79E-15 | 2.08E-14 |
| HSF1      | 0.185383 | 2.30E-05 | 5.87E-05 |
| HSF2BP    | 0.354862 | 9.95E-17 | 8.62E-16 |
| HSF2      | 0.149809 | 6.48E-04 | 1.34E-03 |
| HSF4      | -0.26555 | 9.25E-10 | 3.97E-09 |
| HSF5      | -0.14913 | 6.86E-04 | 1.41E-03 |
| HSFX2     | -0.34581 | 6.52E-16 | 5.21E-15 |
| HSFY2     | -0.12729 | 3.81E-03 | 6.97E-03 |
| HSFYL1    | 0.007005 | 8.74E-01 | 8.98E-01 |
| HSH2D     | -0.07326 | 9.68E-02 | 1.34E-01 |
| HSN2      | 0.19803  | 5.95E-06 | 1.64E-05 |
| HSP90AA1  | 0.372448 | 2.16E-18 | 2.19E-17 |
| HSP90AB1  | 0.216118 | 7.38E-07 | 2.27E-06 |
| HSP90AB2P | 0.133478 | 2.40E-03 | 4.54E-03 |
| HSP90AB4P | 0.037729 | 3.93E-01 | 4.60E-01 |
| HSP90B1   | 0.228714 | 1.54E-07 | 5.16E-07 |
| HSP90B3P  | 0.114178 | 9.51E-03 | 1.62E-02 |
| HSPA12A   | -0.20817 | 1.89E-06 | 5.54E-06 |
| HSPA12B   | -0.3012  | 2.92E-12 | 1.63E-11 |

|         |          |          |          |
|---------|----------|----------|----------|
| HSPA13  | 0.391457 | 2.63E-20 | 3.17E-19 |
| HSPA14  | 0.441819 | 5.09E-26 | 9.80E-25 |
| HSPA1A  | 0.165517 | 1.61E-04 | 3.65E-04 |
| HSPA1B  | 0.210298 | 1.47E-06 | 4.37E-06 |
| HSPA1L  | -0.13748 | 1.76E-03 | 3.41E-03 |
| HSPA2   | 0.124024 | 4.82E-03 | 8.69E-03 |
| HSPA4L  | 0.337781 | 3.28E-15 | 2.44E-14 |
| HSPA4   | 0.317982 | 1.45E-13 | 9.28E-13 |
| HSPA5   | 0.035331 | 4.24E-01 | 4.90E-01 |
| HSPA6   | 0.185685 | 2.23E-05 | 5.70E-05 |
| HSPA7   | -0.04502 | 3.08E-01 | 3.72E-01 |
| HSPA8   | 0.238413 | 4.34E-08 | 1.54E-07 |
| HSPA9   | 0.239733 | 3.64E-08 | 1.30E-07 |
| HSPB11  | 0.204006 | 3.05E-06 | 8.72E-06 |
| HSPB1   | 0.007899 | 8.58E-01 | 8.84E-01 |
| HSPB2   | -0.29684 | 6.18E-12 | 3.33E-11 |
| HSPB3   | -0.26148 | 1.69E-09 | 7.06E-09 |
| HSPB6   | -0.37754 | 6.84E-19 | 7.18E-18 |
| HSPB7   | -0.4917  | 1.05E-32 | 3.18E-31 |
| HSPB8   | -0.28777 | 2.82E-11 | 1.42E-10 |
| HSPB9   | -0.12749 | 3.76E-03 | 6.88E-03 |
| HSPBAP1 | 0.093917 | 3.31E-02 | 5.07E-02 |
| HSPBP1  | 0.169359 | 1.12E-04 | 2.60E-04 |
| HSPC072 | 0.227271 | 1.85E-07 | 6.14E-07 |
| HSPC157 | -0.15505 | 4.13E-04 | 8.78E-04 |
| HSPC159 | -0.12565 | 4.29E-03 | 7.79E-03 |
| HSPD1   | 0.55673  | 2.97E-43 | 1.60E-41 |
| HSPE1   | 0.452788 | 2.13E-27 | 4.56E-26 |
| HSPG2   | -0.28735 | 3.01E-11 | 1.51E-10 |
| HSPH1   | 0.164011 | 1.85E-04 | 4.16E-04 |
| HTATIP2 | 0.180496 | 3.79E-05 | 9.36E-05 |
| HTATSF1 | 0.037192 | 4.00E-01 | 4.66E-01 |
| HTA     | 0.0688   | 1.19E-01 | 1.61E-01 |
| HTN1    | 0.012469 | 7.78E-01 | 8.15E-01 |
| HTR1A   | 0.042851 | 3.32E-01 | 3.97E-01 |
| HTR1B   | 0.03185  | 4.71E-01 | 5.36E-01 |
| HTR1D   | 0.388172 | 5.76E-20 | 6.70E-19 |
| HTR1E   | 0.048282 | 2.74E-01 | 3.36E-01 |
| HTR1F   | -0.03904 | 3.77E-01 | 4.43E-01 |
| HTR2A   | -0.14836 | 7.32E-04 | 1.50E-03 |
| HTR2B   | -0.02861 | 5.17E-01 | 5.81E-01 |
| HTR2C   | 0.220745 | 4.20E-07 | 1.33E-06 |
| HTR3A   | 0.073445 | 9.59E-02 | 1.33E-01 |
| HTR3B   | -0.07346 | 9.59E-02 | 1.33E-01 |

|        |          |          |          |
|--------|----------|----------|----------|
| HTR3C  | -0.23939 | 3.80E-08 | 1.36E-07 |
| HTR3D  | 0.019708 | 6.55E-01 | 7.08E-01 |
| HTR3E  | 0.000275 | 9.95E-01 | 9.96E-01 |
| HTR4   | -0.22107 | 4.03E-07 | 1.28E-06 |
| HTR5A  | -0.00254 | 9.54E-01 | 9.64E-01 |
| HTR6   | 0.064903 | 1.41E-01 | 1.88E-01 |
| HTR7P1 | -0.10884 | 1.35E-02 | 2.23E-02 |
| HTR7   | 0.034889 | 4.29E-01 | 4.96E-01 |
| HTRA1  | -0.05253 | 2.34E-01 | 2.93E-01 |
| HTRA2  | 0.29326  | 1.13E-11 | 5.93E-11 |
| HTRA3  | 0.103491 | 1.88E-02 | 3.03E-02 |
| HTRA4  | -0.0793  | 7.22E-02 | 1.03E-01 |
| HTT    | -0.12361 | 4.97E-03 | 8.93E-03 |
| HULC   | -0.07938 | 7.19E-02 | 1.03E-01 |
| HUNK   | -0.29031 | 1.85E-11 | 9.48E-11 |
| HUS1B  | 0.187875 | 1.77E-05 | 4.60E-05 |
| HUS1   | 0.219152 | 5.10E-07 | 1.61E-06 |
| HUWE1  | 0.124782 | 4.57E-03 | 8.26E-03 |
| HVCN1  | -0.11387 | 9.70E-03 | 1.65E-02 |
| HYAL1  | -0.21494 | 8.49E-07 | 2.60E-06 |
| HYAL2  | -0.0693  | 1.16E-01 | 1.57E-01 |
| HYAL3  | 0.071369 | 1.06E-01 | 1.45E-01 |
| HYAL4  | 0.138625 | 1.61E-03 | 3.13E-03 |
| HYALP1 | 0.043079 | 3.29E-01 | 3.95E-01 |
| HYDIN  | -0.1959  | 7.52E-06 | 2.05E-05 |
| HYI    | -0.3612  | 2.57E-17 | 2.37E-16 |
| HYLS1  | 0.438588 | 1.27E-25 | 2.36E-24 |
| HYMAI  | -0.03993 | 3.66E-01 | 4.32E-01 |
| HYOU1  | 0.125569 | 4.32E-03 | 7.84E-03 |
| IAH1   | 0.245579 | 1.64E-08 | 6.10E-08 |
| IAPP   | 0.188916 | 1.59E-05 | 4.15E-05 |
| IARS2  | 0.081792 | 6.36E-02 | 9.19E-02 |
| IARS   | 0.389121 | 4.60E-20 | 5.41E-19 |
| IBSP   | 0.182092 | 3.22E-05 | 8.04E-05 |
| IBTK   | 0.105333 | 1.68E-02 | 2.73E-02 |
| ICA1L  | -0.09528 | 3.06E-02 | 4.72E-02 |
| ICA1   | -0.07519 | 8.83E-02 | 1.23E-01 |
| ICAM1  | -0.19979 | 4.90E-06 | 1.37E-05 |
| ICAM2  | -0.19673 | 6.87E-06 | 1.88E-05 |
| ICAM3  | -0.14122 | 1.31E-03 | 2.59E-03 |
| ICAM4  | -0.38856 | 5.25E-20 | 6.13E-19 |
| ICAM5  | -0.43624 | 2.44E-25 | 4.44E-24 |
| ICK    | -0.12537 | 4.38E-03 | 7.94E-03 |
| ICMT   | 0.201182 | 4.19E-06 | 1.18E-05 |

|         |          |          |          |
|---------|----------|----------|----------|
| ICOSLG  | -0.12749 | 3.76E-03 | 6.88E-03 |
| ICOS    | 0.053954 | 2.22E-01 | 2.79E-01 |
| ICT1    | 0.296731 | 6.29E-12 | 3.39E-11 |
| ID1     | -0.11426 | 9.45E-03 | 1.61E-02 |
| ID2B    | 0.009463 | 8.30E-01 | 8.60E-01 |
| ID2     | -0.01061 | 8.10E-01 | 8.43E-01 |
| ID3     | -0.03254 | 4.61E-01 | 5.27E-01 |
| ID4     | -0.38195 | 2.47E-19 | 2.73E-18 |
| IDE     | 0.023319 | 5.98E-01 | 6.55E-01 |
| IDH1    | 0.078548 | 7.49E-02 | 1.07E-01 |
| IDH2    | 0.199722 | 4.94E-06 | 1.38E-05 |
| IDH3A   | 0.094915 | 3.13E-02 | 4.81E-02 |
| IDH3B   | 0.056729 | 1.99E-01 | 2.53E-01 |
| IDH3G   | 0.05454  | 2.17E-01 | 2.73E-01 |
| IDI1    | 0.034558 | 4.34E-01 | 5.00E-01 |
| IDI2    | -0.12329 | 5.08E-03 | 9.11E-03 |
| IDO1    | 0.176783 | 5.49E-05 | 1.33E-04 |
| IDO2    | -0.17253 | 8.31E-05 | 1.96E-04 |
| IDS     | -0.03242 | 4.63E-01 | 5.29E-01 |
| IDUA    | -0.42293 | 9.20E-24 | 1.48E-22 |
| IER2    | -0.15572 | 3.90E-04 | 8.33E-04 |
| IER3IP1 | -0.04047 | 3.59E-01 | 4.25E-01 |
| IER3    | 0.148985 | 6.95E-04 | 1.43E-03 |
| IER5L   | 0.23124  | 1.11E-07 | 3.79E-07 |
| IER5    | 0.267853 | 6.53E-10 | 2.86E-09 |
| IFFO1   | -0.15653 | 3.63E-04 | 7.80E-04 |
| IFFO2   | -0.25961 | 2.23E-09 | 9.15E-09 |
| IFI16   | 0.138415 | 1.64E-03 | 3.18E-03 |
| IFI27L1 | 0.044775 | 3.11E-01 | 3.75E-01 |
| IFI27L2 | 0.008094 | 8.55E-01 | 8.81E-01 |
| IFI27   | 0.095074 | 3.10E-02 | 4.77E-02 |
| IFI30   | 0.086218 | 5.05E-02 | 7.44E-02 |
| IFI35   | 0.238294 | 4.41E-08 | 1.56E-07 |
| IFI44L  | 0.105657 | 1.65E-02 | 2.68E-02 |
| IFI44   | 0.120109 | 6.35E-03 | 1.12E-02 |
| IFI6    | 0.097038 | 2.77E-02 | 4.30E-02 |
| IFIH1   | 0.191456 | 1.22E-05 | 3.22E-05 |
| IFIT1B  | 0.015526 | 7.25E-01 | 7.71E-01 |
| IFIT1   | 0.039485 | 3.71E-01 | 4.38E-01 |
| IFIT2   | 0.044983 | 3.08E-01 | 3.72E-01 |
| IFIT3   | 0.136764 | 1.87E-03 | 3.59E-03 |
| IFIT5   | -0.06496 | 1.41E-01 | 1.87E-01 |
| IFITM1  | -0.03207 | 4.68E-01 | 5.34E-01 |
| IFITM2  | -0.24724 | 1.30E-08 | 4.90E-08 |

|         |          |          |          |
|---------|----------|----------|----------|
| IFITM3  | -0.04899 | 2.67E-01 | 3.29E-01 |
| IFITM4P | 0.046407 | 2.93E-01 | 3.56E-01 |
| IFITM5  | -0.07135 | 1.06E-01 | 1.45E-01 |
| IFLTD1  | -0.24291 | 2.36E-08 | 8.63E-08 |
| IFNA10  | 0.019799 | 6.54E-01 | 7.07E-01 |
| IFNA13  | 0.057024 | 1.96E-01 | 2.51E-01 |
| IFNA14  | -0.02958 | 5.03E-01 | 5.67E-01 |
| IFNA16  | 0.047115 | 2.86E-01 | 3.48E-01 |
| IFNA1   | 0.06294  | 1.54E-01 | 2.02E-01 |
| IFNA21  | -0.11349 | 9.95E-03 | 1.69E-02 |
| IFNA2   | 0.098791 | 2.50E-02 | 3.92E-02 |
| IFNA4   | -0.02307 | 6.01E-01 | 6.59E-01 |
| IFNA5   | -0.06846 | 1.21E-01 | 1.63E-01 |
| IFNA7   | -0.11663 | 8.06E-03 | 1.39E-02 |
| IFNA8   | 0.026387 | 5.50E-01 | 6.12E-01 |
| IFNAR1  | -0.16043 | 2.57E-04 | 5.64E-04 |
| IFNAR2  | -0.03758 | 3.95E-01 | 4.62E-01 |
| IFNB1   | 0.18715  | 1.91E-05 | 4.94E-05 |
| IFNE    | 0.188453 | 1.67E-05 | 4.35E-05 |
| IFNGR1  | -0.08967 | 4.20E-02 | 6.29E-02 |
| IFNGR2  | 0.00084  | 9.85E-01 | 9.88E-01 |
| IFNG    | 0.288385 | 2.54E-11 | 1.28E-10 |
| IFNK    | 0.03693  | 4.03E-01 | 4.69E-01 |
| IFNW1   | -0.05093 | 2.49E-01 | 3.09E-01 |
| IFRD1   | 0.4393   | 1.04E-25 | 1.94E-24 |
| IFRD2   | 0.03549  | 4.22E-01 | 4.88E-01 |
| IFT122  | -0.02673 | 5.45E-01 | 6.07E-01 |
| IFT140  | -0.54751 | 1.29E-41 | 6.39E-40 |
| IFT172  | -0.42683 | 3.23E-24 | 5.39E-23 |
| IFT20   | 0.035731 | 4.18E-01 | 4.85E-01 |
| IFT27   | -0.19585 | 7.56E-06 | 2.06E-05 |
| IFT46   | -0.12494 | 4.52E-03 | 8.17E-03 |
| IFT52   | 0.101442 | 2.13E-02 | 3.39E-02 |
| IFT57   | -0.2849  | 4.50E-11 | 2.21E-10 |
| IFT74   | -0.1529  | 4.98E-04 | 1.04E-03 |
| IFT80   | -0.19253 | 1.08E-05 | 2.89E-05 |
| IFT81   | 0.064876 | 1.41E-01 | 1.88E-01 |
| IFT88   | -0.29192 | 1.41E-11 | 7.33E-11 |
| IGBP1   | -0.13621 | 1.95E-03 | 3.74E-03 |
| IGDCC3  | 0.12107  | 5.94E-03 | 1.05E-02 |
| IGDCC4  | 0.118189 | 7.25E-03 | 1.26E-02 |
| IGF1R   | -0.12382 | 4.90E-03 | 8.81E-03 |
| IGF1    | -0.11828 | 7.21E-03 | 1.26E-02 |
| IGF2AS  | 0.092632 | 3.56E-02 | 5.41E-02 |

|         |          |          |          |
|---------|----------|----------|----------|
| IGF2BP1 | 0.373086 | 1.88E-18 | 1.90E-17 |
| IGF2BP2 | 0.371516 | 2.67E-18 | 2.67E-17 |
| IGF2BP3 | 0.545356 | 3.07E-41 | 1.49E-39 |
| IGF2R   | 0.019033 | 6.67E-01 | 7.18E-01 |
| IGF2    | -0.05042 | 2.53E-01 | 3.14E-01 |
| IGFALS  | -0.40648 | 6.55E-22 | 8.94E-21 |
| IGFBP1  | 0.221529 | 3.81E-07 | 1.22E-06 |
| IGFBP2  | -0.15179 | 5.47E-04 | 1.14E-03 |
| IGFBP3  | 0.244398 | 1.93E-08 | 7.12E-08 |
| IGFBP4  | -0.25122 | 7.46E-09 | 2.89E-08 |
| IGFBP5  | 0.047178 | 2.85E-01 | 3.48E-01 |
| IGFBP6  | -0.13993 | 1.46E-03 | 2.85E-03 |
| IGFBP7  | -0.24251 | 2.50E-08 | 9.09E-08 |
| IGFBPL1 | 0.092425 | 3.60E-02 | 5.47E-02 |
| IGFL1   | 0.04487  | 3.09E-01 | 3.74E-01 |
| IGFL2   | 0.100453 | 2.26E-02 | 3.58E-02 |
| IGFL3   | 0.010236 | 8.17E-01 | 8.49E-01 |
| IGFL4   | 0.087936 | 4.61E-02 | 6.85E-02 |
| IGFN1   | -0.29038 | 1.83E-11 | 9.38E-11 |
| IGHMBP2 | 0.047609 | 2.81E-01 | 3.43E-01 |
| IGJ     | -0.25508 | 4.30E-09 | 1.71E-08 |
| IGLL1   | -0.06549 | 1.38E-01 | 1.83E-01 |
| IGLL3   | -0.16669 | 1.45E-04 | 3.29E-04 |
| IGLON5  | 0.239587 | 3.71E-08 | 1.32E-07 |
| IGSF10  | -0.27011 | 4.63E-10 | 2.06E-09 |
| IGSF11  | 0.083223 | 5.91E-02 | 8.59E-02 |
| IGSF1   | 0.056051 | 2.04E-01 | 2.60E-01 |
| IGSF21  | -0.07939 | 7.18E-02 | 1.03E-01 |
| IGSF22  | -0.10257 | 1.99E-02 | 3.19E-02 |
| IGSF3   | -0.17783 | 4.94E-05 | 1.20E-04 |
| IGSF5   | 0.029215 | 5.08E-01 | 5.72E-01 |
| IGSF6   | -0.08245 | 6.15E-02 | 8.91E-02 |
| IGSF8   | -0.14849 | 7.24E-04 | 1.49E-03 |
| IGSF9B  | -0.43108 | 1.02E-24 | 1.76E-23 |
| IGSF9   | 0.13619  | 1.95E-03 | 3.75E-03 |
| IHH     | -0.27646 | 1.73E-10 | 8.05E-10 |
| IKBIP   | 0.345021 | 7.66E-16 | 6.08E-15 |
| IKBKAP  | -0.01705 | 7.00E-01 | 7.48E-01 |
| IKBKB   | -0.31147 | 4.77E-13 | 2.90E-12 |
| IKBKE   | 0.015057 | 7.33E-01 | 7.77E-01 |
| IKBKG   | 0.039224 | 3.74E-01 | 4.41E-01 |
| IKZF1   | -0.17044 | 1.02E-04 | 2.37E-04 |
| IKZF2   | -0.14317 | 1.12E-03 | 2.24E-03 |
| IKZF3   | -0.09755 | 2.68E-02 | 4.18E-02 |

|         |          |          |          |
|---------|----------|----------|----------|
| IKZF4   | -0.24464 | 1.87E-08 | 6.90E-08 |
| IKZF5   | -0.32676 | 2.80E-14 | 1.91E-13 |
| IK      | -0.23712 | 5.16E-08 | 1.81E-07 |
| IL10RA  | -0.09486 | 3.14E-02 | 4.82E-02 |
| IL10RB  | 0.113035 | 1.03E-02 | 1.74E-02 |
| IL10    | 0.075648 | 8.63E-02 | 1.21E-01 |
| IL11RA  | -0.46948 | 1.37E-29 | 3.43E-28 |
| IL11    | 0.309123 | 7.26E-13 | 4.32E-12 |
| IL12A   | 0.088479 | 4.48E-02 | 6.67E-02 |
| IL12B   | -0.24515 | 1.74E-08 | 6.45E-08 |
| IL12RB1 | 0.016099 | 7.15E-01 | 7.62E-01 |
| IL12RB2 | 0.443084 | 3.55E-26 | 6.93E-25 |
| IL13RA1 | -0.00102 | 9.82E-01 | 9.86E-01 |
| IL13RA2 | -0.23452 | 7.26E-08 | 2.51E-07 |
| IL13    | -0.03248 | 4.62E-01 | 5.28E-01 |
| IL15RA  | 0.222736 | 3.28E-07 | 1.06E-06 |
| IL15    | 0.168716 | 1.20E-04 | 2.76E-04 |
| IL16    | -0.27976 | 1.03E-10 | 4.88E-10 |
| IL17A   | 0.106447 | 1.57E-02 | 2.57E-02 |
| IL17B   | 0.048341 | 2.74E-01 | 3.35E-01 |
| IL17C   | 0.161047 | 2.43E-04 | 5.36E-04 |
| IL17D   | -0.23517 | 6.67E-08 | 2.32E-07 |
| IL17F   | -0.08996 | 4.13E-02 | 6.19E-02 |
| IL17RA  | -0.09586 | 2.96E-02 | 4.58E-02 |
| IL17RB  | 0.055524 | 2.08E-01 | 2.64E-01 |
| IL17RC  | -0.28165 | 7.60E-11 | 3.65E-10 |
| IL17RD  | 0.222547 | 3.36E-07 | 1.08E-06 |
| IL17REL | -0.12813 | 3.58E-03 | 6.58E-03 |
| IL17RE  | -0.47751 | 1.09E-30 | 2.93E-29 |
| IL18BP  | 0.098929 | 2.48E-02 | 3.89E-02 |
| IL18R1  | 0.083838 | 5.73E-02 | 8.34E-02 |
| IL18RAP | 0.069249 | 1.17E-01 | 1.58E-01 |
| IL18    | -0.0253  | 5.67E-01 | 6.27E-01 |
| IL19    | -0.02198 | 6.19E-01 | 6.75E-01 |
| IL1A    | 0.239785 | 3.61E-08 | 1.29E-07 |
| IL1B    | 0.157992 | 3.19E-04 | 6.91E-04 |
| IL1F10  | 0.111467 | 1.14E-02 | 1.91E-02 |
| IL1F5   | 0.289188 | 2.23E-11 | 1.13E-10 |
| IL1F6   | -0.07649 | 8.29E-02 | 1.17E-01 |
| IL1F7   | -0.20211 | 3.78E-06 | 1.07E-05 |
| IL1F8   | 0.106773 | 1.53E-02 | 2.52E-02 |
| IL1F9   | 0.036469 | 4.09E-01 | 4.75E-01 |
| IL1R1   | -0.26125 | 1.75E-09 | 7.29E-09 |
| IL1R2   | 0.380157 | 3.75E-19 | 4.04E-18 |

|          |          |          |          |
|----------|----------|----------|----------|
| IL1RAPL1 | 0.036035 | 4.14E-01 | 4.81E-01 |
| IL1RAPL2 | 0.137614 | 1.75E-03 | 3.38E-03 |
| IL1RAP   | 0.132446 | 2.60E-03 | 4.88E-03 |
| IL1RL1   | -0.0979  | 2.63E-02 | 4.11E-02 |
| IL1RL2   | -0.00356 | 9.36E-01 | 9.49E-01 |
| IL1RN    | 0.155338 | 4.03E-04 | 8.58E-04 |
| IL20RA   | -0.02422 | 5.83E-01 | 6.42E-01 |
| IL20RB   | 0.239465 | 3.77E-08 | 1.35E-07 |
| IL20     | -0.06542 | 1.38E-01 | 1.84E-01 |
| IL21R    | 0.037082 | 4.01E-01 | 4.68E-01 |
| IL21     | 0.160881 | 2.46E-04 | 5.43E-04 |
| IL22RA1  | 0.271864 | 3.54E-10 | 1.60E-09 |
| IL22RA2  | -0.0522  | 2.37E-01 | 2.96E-01 |
| IL22     | 0.032354 | 4.64E-01 | 5.29E-01 |
| IL23A    | 0.264832 | 1.03E-09 | 4.40E-09 |
| IL23R    | -0.097   | 2.77E-02 | 4.31E-02 |
| IL24     | 0.010879 | 8.05E-01 | 8.39E-01 |
| IL25     | -0.11602 | 8.40E-03 | 1.44E-02 |
| IL26     | 0.04791  | 2.78E-01 | 3.40E-01 |
| IL27RA   | -0.14751 | 7.86E-04 | 1.60E-03 |
| IL27     | 0.306223 | 1.21E-12 | 7.06E-12 |
| IL28A    | 0.18311  | 2.91E-05 | 7.29E-05 |
| IL28B    | 0.167173 | 1.38E-04 | 3.15E-04 |
| IL28RA   | -0.22506 | 2.45E-07 | 8.03E-07 |
| IL29     | 0.147988 | 7.55E-04 | 1.55E-03 |
| IL2RA    | 0.22516  | 2.42E-07 | 7.93E-07 |
| IL2RB    | 0.150948 | 5.88E-04 | 1.22E-03 |
| IL2RG    | -0.06118 | 1.66E-01 | 2.16E-01 |
| IL2      | -0.17764 | 5.04E-05 | 1.23E-04 |
| IL31RA   | -0.01246 | 7.78E-01 | 8.16E-01 |
| IL31     | 0.130284 | 3.06E-03 | 5.68E-03 |
| IL32     | 0.095786 | 2.97E-02 | 4.59E-02 |
| IL33     | -0.41734 | 4.02E-23 | 6.09E-22 |
| IL34     | -0.26957 | 5.03E-10 | 2.23E-09 |
| IL3RA    | -0.13858 | 1.62E-03 | 3.14E-03 |
| IL3      | -0.03168 | 4.73E-01 | 5.39E-01 |
| IL411    | 0.252491 | 6.23E-09 | 2.44E-08 |
| IL4R     | -0.10092 | 2.20E-02 | 3.49E-02 |
| IL4      | -0.09385 | 3.32E-02 | 5.09E-02 |
| IL5RA    | -0.25777 | 2.92E-09 | 1.18E-08 |
| IL5      | 0.005015 | 9.10E-01 | 9.28E-01 |
| IL6R     | -0.45487 | 1.16E-27 | 2.52E-26 |
| IL6ST    | -0.20954 | 1.61E-06 | 4.76E-06 |
| IL6      | 0.254105 | 4.95E-09 | 1.96E-08 |



|        |          |          |          |
|--------|----------|----------|----------|
| IL7R   | -0.10136 | 2.14E-02 | 3.41E-02 |
| IL7    | -0.05594 | 2.05E-01 | 2.61E-01 |
| IL8    | 0.368777 | 4.91E-18 | 4.79E-17 |
| IL9R   | -0.04734 | 2.84E-01 | 3.46E-01 |
| IL9    | 0.054197 | 2.20E-01 | 2.77E-01 |
| ILDR1  | -0.33219 | 9.85E-15 | 7.01E-14 |
| ILDR2  | -0.08681 | 4.90E-02 | 7.23E-02 |
| ILF2   | 0.411022 | 2.06E-22 | 2.93E-21 |
| ILF3   | 0.128653 | 3.45E-03 | 6.36E-03 |
| ILKAP  | 0.213454 | 1.01E-06 | 3.07E-06 |
| ILK    | -0.16804 | 1.27E-04 | 2.92E-04 |
| ILVBL  | 0.056358 | 2.02E-01 | 2.57E-01 |
| IMMP1L | 0.126537 | 4.03E-03 | 7.34E-03 |
| IMMP2L | -0.01566 | 7.23E-01 | 7.69E-01 |
| IMMT   | 0.496729 | 1.92E-33 | 6.07E-32 |
| IMP3   | -0.16754 | 1.33E-04 | 3.05E-04 |
| IMP4   | 0.224203 | 2.73E-07 | 8.89E-07 |
| IMP5   | 0.095995 | 2.94E-02 | 4.55E-02 |
| IMPA1  | 0.251653 | 7.02E-09 | 2.73E-08 |
| IMPA2  | -0.12117 | 5.90E-03 | 1.05E-02 |
| IMPACT | 0.009438 | 8.31E-01 | 8.61E-01 |
| IMPAD1 | 0.188055 | 1.74E-05 | 4.52E-05 |
| IMPDH1 | 0.053076 | 2.29E-01 | 2.88E-01 |
| IMPDH2 | -0.02518 | 5.69E-01 | 6.28E-01 |
| IMPG1  | -0.27941 | 1.09E-10 | 5.14E-10 |
| IMPG2  | 0.070652 | 1.09E-01 | 1.49E-01 |
| INADL  | -0.2351  | 6.74E-08 | 2.34E-07 |
| INA    | 0.328748 | 1.92E-14 | 1.32E-13 |
| INCA1  | -0.35703 | 6.29E-17 | 5.55E-16 |
| INCENP | 0.659511 | 1.37E-65 | 1.35E-63 |
| INE1   | -0.19282 | 1.05E-05 | 2.80E-05 |
| INE2   | -0.29018 | 1.89E-11 | 9.68E-11 |
| INF2   | 0.013955 | 7.52E-01 | 7.94E-01 |
| ING1   | 0.1384   | 1.64E-03 | 3.19E-03 |
| ING2   | 0.003014 | 9.46E-01 | 9.57E-01 |
| ING3   | -0.00118 | 9.79E-01 | 9.84E-01 |
| ING4   | -0.18756 | 1.83E-05 | 4.74E-05 |
| ING5   | -0.2476  | 1.24E-08 | 4.67E-08 |
| INGX   | 0.061896 | 1.61E-01 | 2.10E-01 |
| INHA   | 0.059145 | 1.80E-01 | 2.33E-01 |
| INHBA  | 0.238771 | 4.14E-08 | 1.47E-07 |
| INHBB  | -0.10633 | 1.58E-02 | 2.58E-02 |
| INHBC  | 0.107339 | 1.48E-02 | 2.44E-02 |
| INHBE  | 0.379773 | 4.09E-19 | 4.39E-18 |

|          |          |          |          |
|----------|----------|----------|----------|
| INMT     | -0.60106 | 6.77E-52 | 4.81E-50 |
| INO80B   | 0.034176 | 4.39E-01 | 5.05E-01 |
| INO80C   | 0.01367  | 7.57E-01 | 7.98E-01 |
| INO80D   | -0.23814 | 4.50E-08 | 1.59E-07 |
| INO80E   | -0.03583 | 4.17E-01 | 4.84E-01 |
| INO80    | -0.22217 | 3.52E-07 | 1.13E-06 |
| INPP1    | 0.07231  | 1.01E-01 | 1.39E-01 |
| INPP4A   | -0.19065 | 1.32E-05 | 3.48E-05 |
| INPP4B   | 0.250287 | 8.51E-09 | 3.27E-08 |
| INPP5A   | -0.39239 | 2.11E-20 | 2.55E-19 |
| INPP5B   | -0.34565 | 6.73E-16 | 5.38E-15 |
| INPP5D   | -0.17306 | 7.89E-05 | 1.87E-04 |
| INPP5E   | -0.18625 | 2.10E-05 | 5.39E-05 |
| INPP5F   | 0.024781 | 5.75E-01 | 6.34E-01 |
| INPP5J   | -0.28407 | 5.14E-11 | 2.51E-10 |
| INPP5K   | -0.49128 | 1.21E-32 | 3.64E-31 |
| INPPL1   | -0.12837 | 3.52E-03 | 6.48E-03 |
| INS-IGF2 | 0.00546  | 9.02E-01 | 9.21E-01 |
| INSC     | -0.03556 | 4.21E-01 | 4.87E-01 |
| INSIG1   | 0.124903 | 4.53E-03 | 8.19E-03 |
| INSIG2   | -0.08232 | 6.19E-02 | 8.97E-02 |
| INSL3    | 0.170017 | 1.06E-04 | 2.46E-04 |
| INSL4    | 0.11889  | 6.91E-03 | 1.21E-02 |
| INSL5    | -0.1434  | 1.10E-03 | 2.20E-03 |
| INSL6    | 0.05391  | 2.22E-01 | 2.80E-01 |
| INSM1    | 0.07706  | 8.06E-02 | 1.14E-01 |
| INSM2    | 0.043079 | 3.29E-01 | 3.95E-01 |
| INSRR    | 0.08181  | 6.36E-02 | 9.19E-02 |
| INSR     | -0.15438 | 4.38E-04 | 9.28E-04 |
| INS      | 0.04236  | 3.37E-01 | 4.03E-01 |
| INTS10   | -0.06805 | 1.23E-01 | 1.66E-01 |
| INTS12   | -0.00026 | 9.95E-01 | 9.96E-01 |
| INTS1    | 0.136641 | 1.88E-03 | 3.62E-03 |
| INTS2    | 0.294061 | 9.88E-12 | 5.21E-11 |
| INTS3    | -0.1783  | 4.72E-05 | 1.15E-04 |
| INTS4L1  | -0.04532 | 3.05E-01 | 3.68E-01 |
| INTS4L2  | 0.0101   | 8.19E-01 | 8.51E-01 |
| INTS4    | 0.188312 | 1.70E-05 | 4.40E-05 |
| INTS5    | -0.18068 | 3.72E-05 | 9.20E-05 |
| INTS6    | 0.152367 | 5.21E-04 | 1.09E-03 |
| INTS7    | 0.343538 | 1.04E-15 | 8.08E-15 |
| INTS8    | 0.328364 | 2.06E-14 | 1.42E-13 |
| INTS9    | -0.17447 | 6.89E-05 | 1.64E-04 |
| INTU     | -0.01298 | 7.69E-01 | 8.08E-01 |

|          |          |          |          |
|----------|----------|----------|----------|
| INVS     | 0.148609 | 7.17E-04 | 1.47E-03 |
| IP6K1    | -0.26194 | 1.58E-09 | 6.61E-09 |
| IP6K2    | -0.23639 | 5.68E-08 | 1.98E-07 |
| IP6K3    | -0.00704 | 8.73E-01 | 8.97E-01 |
| IPCEF1   | -0.20284 | 3.48E-06 | 9.89E-06 |
| IPMK     | 0.246999 | 1.35E-08 | 5.05E-08 |
| IPO11    | 0.182947 | 2.95E-05 | 7.40E-05 |
| IPO13    | -0.01324 | 7.64E-01 | 8.04E-01 |
| IPO4     | 0.301211 | 2.92E-12 | 1.63E-11 |
| IPO5     | 0.288781 | 2.38E-11 | 1.21E-10 |
| IPO7     | 0.135173 | 2.11E-03 | 4.02E-03 |
| IPO8     | 0.341519 | 1.56E-15 | 1.19E-14 |
| IPO9     | 0.289963 | 1.96E-11 | 1.00E-10 |
| IPPK     | 0.267558 | 6.83E-10 | 2.98E-09 |
| IPP      | 0.000134 | 9.98E-01 | 9.98E-01 |
| IPW      | -0.22452 | 2.62E-07 | 8.56E-07 |
| IQCA1    | -0.22292 | 3.20E-07 | 1.03E-06 |
| IQCB1    | 0.157664 | 3.28E-04 | 7.10E-04 |
| IQCC     | 0.020127 | 6.49E-01 | 7.02E-01 |
| IQCD     | 0.100657 | 2.23E-02 | 3.54E-02 |
| IQCE     | -0.09931 | 2.42E-02 | 3.81E-02 |
| IQCF1    | -0.1346  | 2.20E-03 | 4.19E-03 |
| IQCF2    | 0.007401 | 8.67E-01 | 8.92E-01 |
| IQCF3    | -0.03253 | 4.61E-01 | 5.27E-01 |
| IQCF5    | 0.154433 | 4.36E-04 | 9.24E-04 |
| IQCF6    | -0.07897 | 7.33E-02 | 1.05E-01 |
| IQCG     | -0.14766 | 7.76E-04 | 1.59E-03 |
| IQCH     | -0.02101 | 6.34E-01 | 6.89E-01 |
| IQCJ     | 0.053641 | 2.24E-01 | 2.82E-01 |
| IQCK     | -0.31696 | 1.75E-13 | 1.11E-12 |
| IQGAP1   | -0.18107 | 3.58E-05 | 8.87E-05 |
| IQGAP2   | -0.1674  | 1.35E-04 | 3.09E-04 |
| IQGAP3   | 0.720473 | 1.38E-83 | 1.73E-81 |
| IQSEC1   | -0.31252 | 3.94E-13 | 2.41E-12 |
| IQSEC2   | -0.18747 | 1.85E-05 | 4.79E-05 |
| IQSEC3   | -0.18923 | 1.54E-05 | 4.02E-05 |
| IQUB     | -0.18561 | 2.25E-05 | 5.74E-05 |
| IRAK1BP1 | -0.0521  | 2.38E-01 | 2.97E-01 |
| IRAK1    | 0.333862 | 7.11E-15 | 5.12E-14 |
| IRAK2    | 0.062234 | 1.58E-01 | 2.08E-01 |
| IRAK3    | -0.1199  | 6.45E-03 | 1.13E-02 |
| IRAK4    | 0.098081 | 2.60E-02 | 4.07E-02 |
| IREB2    | 0.127462 | 3.76E-03 | 6.89E-03 |
| IRF1     | 0.18564  | 2.24E-05 | 5.72E-05 |

|         |          |          |          |
|---------|----------|----------|----------|
| IRF2BP1 | -0.11333 | 1.01E-02 | 1.71E-02 |
| IRF2BP2 | -0.36134 | 2.50E-17 | 2.31E-16 |
| IRF2    | -0.25422 | 4.87E-09 | 1.93E-08 |
| IRF3    | -0.1031  | 1.93E-02 | 3.10E-02 |
| IRF4    | -0.12108 | 5.94E-03 | 1.05E-02 |
| IRF5    | 0.037516 | 3.96E-01 | 4.62E-01 |
| IRF6    | -0.14372 | 1.07E-03 | 2.14E-03 |
| IRF7    | -0.04453 | 3.13E-01 | 3.78E-01 |
| IRF8    | -0.16258 | 2.11E-04 | 4.70E-04 |
| IRF9    | 0.065063 | 1.40E-01 | 1.86E-01 |
| IRGC    | 0.046018 | 2.97E-01 | 3.61E-01 |
| IRGM    | -0.05003 | 2.57E-01 | 3.18E-01 |
| IRGQ    | -0.11471 | 9.18E-03 | 1.57E-02 |
| IRS1    | 0.166549 | 1.46E-04 | 3.33E-04 |
| IRS2    | -0.14384 | 1.06E-03 | 2.13E-03 |
| IRS4    | -0.06055 | 1.70E-01 | 2.21E-01 |
| IRX1    | -0.39098 | 2.95E-20 | 3.53E-19 |
| IRX2    | -0.41698 | 4.42E-23 | 6.67E-22 |
| IRX3    | -0.50276 | 2.42E-34 | 8.06E-33 |
| IRX4    | 0.246207 | 1.50E-08 | 5.61E-08 |
| IRX5    | -0.46744 | 2.57E-29 | 6.30E-28 |
| IRX6    | -0.25164 | 7.03E-09 | 2.73E-08 |
| ISCA1P1 | 0.19686  | 6.77E-06 | 1.85E-05 |
| ISCA1   | 0.025735 | 5.60E-01 | 6.21E-01 |
| ISCA2   | 0.037546 | 3.95E-01 | 4.62E-01 |
| ISCU    | -0.37757 | 6.78E-19 | 7.13E-18 |
| ISG15   | 0.30104  | 3.00E-12 | 1.68E-11 |
| ISG20L2 | 0.334525 | 6.24E-15 | 4.52E-14 |
| ISG20   | 0.006102 | 8.90E-01 | 9.11E-01 |
| ISL1    | 0.049947 | 2.58E-01 | 3.19E-01 |
| ISL2    | 0.278228 | 1.31E-10 | 6.16E-10 |
| ISLR2   | -0.30403 | 1.78E-12 | 1.02E-11 |
| ISLR    | -0.02604 | 5.55E-01 | 6.17E-01 |
| ISM1    | -0.26968 | 4.95E-10 | 2.19E-09 |
| ISM2    | 0.349074 | 3.33E-16 | 2.74E-15 |
| ISOC1   | -0.07797 | 7.71E-02 | 1.09E-01 |
| ISOC2   | 0.050112 | 2.56E-01 | 3.17E-01 |
| ISPD    | -0.00032 | 9.94E-01 | 9.95E-01 |
| ISX     | 0.091571 | 3.78E-02 | 5.71E-02 |
| ISY1    | 0.441385 | 5.75E-26 | 1.10E-24 |
| ISYNA1  | -0.10215 | 2.04E-02 | 3.26E-02 |
| ITCH    | 0.294789 | 8.74E-12 | 4.64E-11 |
| ITFG1   | -0.13835 | 1.65E-03 | 3.20E-03 |
| ITFG2   | -0.31679 | 1.81E-13 | 1.14E-12 |

|          |          |          |          |
|----------|----------|----------|----------|
| ITFG3    | -0.18558 | 2.26E-05 | 5.76E-05 |
| ITGA10   | -0.39777 | 5.70E-21 | 7.25E-20 |
| ITGA11   | 0.135505 | 2.06E-03 | 3.93E-03 |
| ITGA1    | -0.01467 | 7.40E-01 | 7.83E-01 |
| ITGA2B   | 0.125702 | 4.28E-03 | 7.77E-03 |
| ITGA2    | 0.065231 | 1.39E-01 | 1.85E-01 |
| ITGA3    | -0.11977 | 6.50E-03 | 1.14E-02 |
| ITGA4    | -0.10833 | 1.39E-02 | 2.30E-02 |
| ITGA5    | 0.341307 | 1.62E-15 | 1.24E-14 |
| ITGA6    | 0.140863 | 1.35E-03 | 2.66E-03 |
| ITGA7    | -0.22618 | 2.13E-07 | 7.02E-07 |
| ITGA8    | -0.41123 | 1.96E-22 | 2.78E-21 |
| ITGA9    | -0.51716 | 1.45E-36 | 5.45E-35 |
| ITGAD    | -0.12057 | 6.15E-03 | 1.09E-02 |
| ITGAE    | 0.187871 | 1.78E-05 | 4.60E-05 |
| ITGAL    | -0.16868 | 1.20E-04 | 2.76E-04 |
| ITGAM    | -0.1226  | 5.34E-03 | 9.53E-03 |
| ITGAV    | 0.248502 | 1.09E-08 | 4.14E-08 |
| ITGAX    | -0.05494 | 2.13E-01 | 2.70E-01 |
| ITGB1BP1 | 0.408125 | 4.32E-22 | 5.99E-21 |
| ITGB1BP2 | -0.0597  | 1.76E-01 | 2.28E-01 |
| ITGB1BP3 | -0.01647 | 7.09E-01 | 7.57E-01 |
| ITGB1    | 0.330068 | 1.49E-14 | 1.04E-13 |
| ITGB2    | -0.11002 | 1.25E-02 | 2.08E-02 |
| ITGB3BP  | 0.346302 | 5.90E-16 | 4.74E-15 |
| ITGB3    | -0.01534 | 7.28E-01 | 7.74E-01 |
| ITGB4    | -0.0606  | 1.70E-01 | 2.21E-01 |
| ITGB5    | 0.017186 | 6.97E-01 | 7.46E-01 |
| ITGB6    | -0.28091 | 8.55E-11 | 4.09E-10 |
| ITGB7    | 0.010674 | 8.09E-01 | 8.42E-01 |
| ITGB8    | 0.121715 | 5.68E-03 | 1.01E-02 |
| ITGBL1   | -0.31317 | 3.50E-13 | 2.16E-12 |
| ITIH1    | -0.07017 | 1.12E-01 | 1.52E-01 |
| ITIH2    | -0.2151  | 8.34E-07 | 2.55E-06 |
| ITIH3    | -0.41192 | 1.64E-22 | 2.35E-21 |
| ITIH4    | -0.22172 | 3.72E-07 | 1.19E-06 |
| ITIH5L   | -0.06154 | 1.63E-01 | 2.13E-01 |
| ITIH5    | -0.53345 | 3.26E-39 | 1.44E-37 |
| ITK      | -0.09014 | 4.09E-02 | 6.14E-02 |
| ITLN1    | -0.17799 | 4.87E-05 | 1.19E-04 |
| ITLN2    | -0.1643  | 1.80E-04 | 4.05E-04 |
| ITM2A    | -0.2876  | 2.89E-11 | 1.45E-10 |
| ITM2B    | -0.33379 | 7.21E-15 | 5.19E-14 |
| ITM2C    | -0.00086 | 9.84E-01 | 9.88E-01 |

|               |          |          |          |
|---------------|----------|----------|----------|
| ITPA          | 0.02716  | 5.39E-01 | 6.01E-01 |
| ITPK1         | -0.06312 | 1.53E-01 | 2.01E-01 |
| ITPKA         | 0.198111 | 5.90E-06 | 1.63E-05 |
| ITPKB         | -0.3949  | 1.15E-20 | 1.43E-19 |
| ITPKC         | -0.07131 | 1.06E-01 | 1.45E-01 |
| ITPR1         | -0.32454 | 4.27E-14 | 2.86E-13 |
| ITPR2         | -0.26395 | 1.18E-09 | 4.98E-09 |
| ITPR3         | -0.23357 | 8.23E-08 | 2.83E-07 |
| ITPRIPL1      | 0.172665 | 8.20E-05 | 1.93E-04 |
| ITPRIPL2      | -0.06672 | 1.30E-01 | 1.75E-01 |
| ITPRIP        | -0.1121  | 1.09E-02 | 1.84E-02 |
| ITSN1         | 0.108277 | 1.40E-02 | 2.31E-02 |
| ITSN2         | -0.179   | 4.40E-05 | 1.08E-04 |
| IVD           | -0.48707 | 4.89E-32 | 1.43E-30 |
| IVL           | -0.08928 | 4.28E-02 | 6.41E-02 |
| IVNS1ABP      | 0.011533 | 7.94E-01 | 8.30E-01 |
| IWS1          | 0.156639 | 3.60E-04 | 7.73E-04 |
| IYD           | -0.37509 | 1.19E-18 | 1.23E-17 |
| IZUMO1        | -0.13462 | 2.20E-03 | 4.18E-03 |
| JAG1          | 0.016381 | 7.11E-01 | 7.58E-01 |
| JAG2          | 0.006306 | 8.86E-01 | 9.08E-01 |
| JAGN1         | 0.041114 | 3.52E-01 | 4.18E-01 |
| JAK1          | -0.14815 | 7.45E-04 | 1.53E-03 |
| JAK2          | -0.06845 | 1.21E-01 | 1.63E-01 |
| JAK3          | 0.036093 | 4.14E-01 | 4.80E-01 |
| JAKMIP1       | -0.00884 | 8.41E-01 | 8.70E-01 |
| JAKMIP2       | 0.031691 | 4.73E-01 | 5.39E-01 |
| JAKMIP3       | -0.08046 | 6.81E-02 | 9.78E-02 |
| JAM2          | -0.40522 | 8.98E-22 | 1.21E-20 |
| JAM3          | -0.12581 | 4.24E-03 | 7.71E-03 |
| JARID2        | 0.08553  | 5.24E-02 | 7.69E-02 |
| JAZF1         | -0.1669  | 1.42E-04 | 3.23E-04 |
| JDP2          | -0.2981  | 4.98E-12 | 2.72E-11 |
| JHDM1D        | -0.17943 | 4.22E-05 | 1.03E-04 |
| JKAMP         | 0.016619 | 7.07E-01 | 7.55E-01 |
| JMJD1C        | -0.18549 | 2.27E-05 | 5.80E-05 |
| JMJD4         | 0.124424 | 4.69E-03 | 8.46E-03 |
| JMJD5         | -0.2985  | 4.65E-12 | 2.55E-11 |
| JMJD6         | 0.375484 | 1.09E-18 | 1.13E-17 |
| JMJD7-PLA2G4B | -0.49756 | 1.45E-33 | 4.58E-32 |
| JMJD8         | -0.42004 | 1.98E-23 | 3.08E-22 |
| JMY           | -0.23226 | 9.77E-08 | 3.34E-07 |
| JOSD1         | 0.167744 | 1.31E-04 | 3.00E-04 |
| JOSD2         | -0.03937 | 3.73E-01 | 4.39E-01 |

|         |          |          |          |
|---------|----------|----------|----------|
| JPH1    | -0.28714 | 3.12E-11 | 1.56E-10 |
| JPH2    | -0.1041  | 1.81E-02 | 2.93E-02 |
| JPH3    | 0.076109 | 8.44E-02 | 1.18E-01 |
| JPH4    | -0.42596 | 4.08E-24 | 6.75E-23 |
| JRKL    | -0.13173 | 2.74E-03 | 5.14E-03 |
| JRK     | -0.01998 | 6.51E-01 | 7.05E-01 |
| JSRP1   | 0.041332 | 3.49E-01 | 4.15E-01 |
| JTB     | -0.02752 | 5.33E-01 | 5.96E-01 |
| JUB     | -0.0528  | 2.32E-01 | 2.90E-01 |
| JUNB    | -0.14545 | 9.32E-04 | 1.88E-03 |
| JUND    | -0.29145 | 1.53E-11 | 7.92E-11 |
| JUN     | -0.25867 | 2.56E-09 | 1.04E-08 |
| JUP     | 0.05622  | 2.03E-01 | 2.58E-01 |
| KAAG1   | 0.18285  | 2.98E-05 | 7.47E-05 |
| KAL1    | -0.30812 | 8.68E-13 | 5.14E-12 |
| KALRN   | -0.10412 | 1.81E-02 | 2.93E-02 |
| KANK1   | -0.41535 | 6.76E-23 | 1.00E-21 |
| KANK2   | -0.43502 | 3.43E-25 | 6.15E-24 |
| KANK3   | -0.3882  | 5.72E-20 | 6.66E-19 |
| KANK4   | -0.17247 | 8.35E-05 | 1.97E-04 |
| KARS    | 0.247202 | 1.31E-08 | 4.92E-08 |
| KAT2A   | 0.053804 | 2.23E-01 | 2.80E-01 |
| KAT2B   | -0.35183 | 1.88E-16 | 1.58E-15 |
| KAT5    | -0.2626  | 1.44E-09 | 6.03E-09 |
| KATNA1  | 0.25281  | 5.96E-09 | 2.33E-08 |
| KATNAL1 | 0.009919 | 8.22E-01 | 8.54E-01 |
| KATNAL2 | -0.18142 | 3.45E-05 | 8.58E-05 |
| KATNB1  | -0.15426 | 4.43E-04 | 9.37E-04 |
| KAZALD1 | -0.0008  | 9.86E-01 | 9.89E-01 |
| KAZ     | -0.29548 | 7.78E-12 | 4.14E-11 |
| KBTBD10 | -0.20857 | 1.80E-06 | 5.30E-06 |
| KBTBD11 | -0.29178 | 1.45E-11 | 7.50E-11 |
| KBTBD12 | 0.049241 | 2.65E-01 | 3.26E-01 |
| KBTBD13 | -0.22756 | 1.79E-07 | 5.93E-07 |
| KBTBD2  | 0.220095 | 4.54E-07 | 1.44E-06 |
| KBTBD3  | -0.27267 | 3.13E-10 | 1.42E-09 |
| KBTBD4  | -0.15636 | 3.68E-04 | 7.90E-04 |
| KBTBD5  | -0.0527  | 2.33E-01 | 2.91E-01 |
| KBTBD6  | -0.01114 | 8.01E-01 | 8.36E-01 |
| KBTBD7  | -0.14414 | 1.04E-03 | 2.08E-03 |
| KBTBD8  | -0.01546 | 7.26E-01 | 7.72E-01 |
| KC6     | 0.125084 | 4.47E-03 | 8.09E-03 |
| KCMF1   | 0.484604 | 1.10E-31 | 3.14E-30 |
| KCNA10  | -0.14094 | 1.34E-03 | 2.65E-03 |

|        |          |          |          |
|--------|----------|----------|----------|
| KCNA1  | -0.08165 | 6.41E-02 | 9.26E-02 |
| KCNA2  | -0.13299 | 2.49E-03 | 4.70E-03 |
| KCNA3  | -0.23933 | 3.84E-08 | 1.37E-07 |
| KCNA4  | -0.33187 | 1.05E-14 | 7.42E-14 |
| KCNA5  | -0.41896 | 2.63E-23 | 4.05E-22 |
| KCNA6  | -0.12433 | 4.72E-03 | 8.51E-03 |
| KCNA7  | 0.153259 | 4.83E-04 | 1.01E-03 |
| KCNAB1 | -0.25302 | 5.78E-09 | 2.27E-08 |
| KCNAB2 | -0.11819 | 7.25E-03 | 1.26E-02 |
| KCNAB3 | -0.17321 | 7.78E-05 | 1.84E-04 |
| KCNB1  | -0.18198 | 3.26E-05 | 8.12E-05 |
| KCNB2  | 0.000822 | 9.85E-01 | 9.88E-01 |
| KCNC1  | 0.034526 | 4.34E-01 | 5.01E-01 |
| KCNC2  | 0.071646 | 1.04E-01 | 1.43E-01 |
| KCNC3  | -0.36557 | 9.95E-18 | 9.47E-17 |
| KCNC4  | -0.2034  | 3.27E-06 | 9.32E-06 |
| KCND1  | 0.031915 | 4.70E-01 | 5.36E-01 |
| KCND2  | 0.399894 | 3.38E-21 | 4.38E-20 |
| KCND3  | -0.39293 | 1.85E-20 | 2.24E-19 |
| KCNE1L | -0.17791 | 4.91E-05 | 1.20E-04 |
| KCNE1  | -0.25001 | 8.85E-09 | 3.40E-08 |
| KCNE2  | -0.12285 | 5.24E-03 | 9.38E-03 |
| KCNE3  | -0.00171 | 9.69E-01 | 9.76E-01 |
| KCNE4  | -0.13965 | 1.49E-03 | 2.91E-03 |
| KCNF1  | 0.251076 | 7.62E-09 | 2.94E-08 |
| KCNG1  | 0.200382 | 4.59E-06 | 1.29E-05 |
| KCNG2  | -0.13517 | 2.11E-03 | 4.02E-03 |
| KCNG3  | 0.205274 | 2.64E-06 | 7.59E-06 |
| KCNG4  | 0.050055 | 2.57E-01 | 3.18E-01 |
| KCNH1  | -0.04591 | 2.98E-01 | 3.62E-01 |
| KCNH2  | -0.09826 | 2.58E-02 | 4.03E-02 |
| KCNH3  | -0.03541 | 4.23E-01 | 4.89E-01 |
| KCNH4  | -0.03697 | 4.02E-01 | 4.69E-01 |
| KCNH5  | 0.257483 | 3.04E-09 | 1.23E-08 |
| KCNH6  | 0.079031 | 7.31E-02 | 1.04E-01 |
| KCNH7  | 0.217226 | 6.45E-07 | 2.00E-06 |
| KCNH8  | -0.06261 | 1.56E-01 | 2.05E-01 |
| KCNIP1 | -0.16098 | 2.44E-04 | 5.38E-04 |
| KCNIP2 | -0.21382 | 9.72E-07 | 2.94E-06 |
| KCNIP3 | -0.12193 | 5.60E-03 | 9.96E-03 |
| KCNIP4 | -0.00257 | 9.54E-01 | 9.63E-01 |
| KCNJ10 | 0.213943 | 9.57E-07 | 2.90E-06 |
| KCNJ11 | -0.29732 | 5.69E-12 | 3.09E-11 |
| KCNJ12 | 0.037423 | 3.97E-01 | 4.63E-01 |



|          |          |          |          |
|----------|----------|----------|----------|
| KCNJ13   | -0.10922 | 1.31E-02 | 2.18E-02 |
| KCNJ14   | 0.212986 | 1.07E-06 | 3.24E-06 |
| KCNJ15   | -0.30402 | 1.79E-12 | 1.03E-11 |
| KCNJ16   | -0.17168 | 9.02E-05 | 2.11E-04 |
| KCNJ1    | -0.13396 | 2.32E-03 | 4.38E-03 |
| KCNJ2    | -0.00426 | 9.23E-01 | 9.39E-01 |
| KCNJ3    | 0.059878 | 1.75E-01 | 2.27E-01 |
| KCNJ4    | 0.183621 | 2.76E-05 | 6.95E-05 |
| KCNJ5    | -0.25318 | 5.65E-09 | 2.22E-08 |
| KCNJ6    | 0.04252  | 3.36E-01 | 4.01E-01 |
| KCNJ8    | -0.19336 | 9.91E-06 | 2.65E-05 |
| KCNJ9    | 0.058262 | 1.87E-01 | 2.40E-01 |
| KCNK10   | 0.029113 | 5.10E-01 | 5.74E-01 |
| KCNK12   | 0.272739 | 3.09E-10 | 1.41E-09 |
| KCNK13   | 0.08544  | 5.27E-02 | 7.73E-02 |
| KCNK15   | -0.19357 | 9.69E-06 | 2.60E-05 |
| KCNK16   | -0.19334 | 9.93E-06 | 2.66E-05 |
| KCNK17   | -0.34393 | 9.56E-16 | 7.49E-15 |
| KCNK18   | 0.093081 | 3.47E-02 | 5.29E-02 |
| KCNK1    | -0.13376 | 2.35E-03 | 4.45E-03 |
| KCNK2    | 0.085397 | 5.28E-02 | 7.74E-02 |
| KCNK3    | -0.31299 | 3.62E-13 | 2.22E-12 |
| KCNK4    | -0.2694  | 5.17E-10 | 2.29E-09 |
| KCNK5    | -0.36273 | 1.85E-17 | 1.73E-16 |
| KCNK6    | 0.06406  | 1.47E-01 | 1.94E-01 |
| KCNK7    | 0.010311 | 8.15E-01 | 8.48E-01 |
| KCNK9    | 0.219213 | 5.06E-07 | 1.59E-06 |
| KCNMA1   | -0.082   | 6.29E-02 | 9.10E-02 |
| KCNMB1   | -0.13369 | 2.36E-03 | 4.47E-03 |
| KCNMB2   | -0.1163  | 8.25E-03 | 1.42E-02 |
| KCNMB3   | 0.024978 | 5.72E-01 | 6.31E-01 |
| KCNMB4   | 0.3      | 3.59E-12 | 2.00E-11 |
| KCNN1    | 0.110093 | 1.24E-02 | 2.07E-02 |
| KCNN2    | -0.16817 | 1.26E-04 | 2.89E-04 |
| KCNN3    | -0.08519 | 5.33E-02 | 7.82E-02 |
| KCNN4    | 0.015665 | 7.23E-01 | 7.69E-01 |
| KCNQ1DN  | 0.076838 | 8.15E-02 | 1.15E-01 |
| KCNQ1OT1 | -0.16599 | 1.54E-04 | 3.50E-04 |
| KCNQ1    | -0.49834 | 1.11E-33 | 3.53E-32 |
| KCNQ2    | -0.03725 | 3.99E-01 | 4.65E-01 |
| KCNQ3    | -0.21302 | 1.07E-06 | 3.23E-06 |
| KCNQ4    | -0.15061 | 6.05E-04 | 1.26E-03 |
| KCNQ5    | 0.020341 | 6.45E-01 | 6.99E-01 |
| KCNRG    | -0.2662  | 8.39E-10 | 3.62E-09 |

|        |          |          |          |
|--------|----------|----------|----------|
| KCNS1  | -0.1337  | 2.36E-03 | 4.47E-03 |
| KCNS2  | -0.29504 | 8.38E-12 | 4.45E-11 |
| KCNS3  | -0.23323 | 8.61E-08 | 2.96E-07 |
| KCNT1  | -0.07095 | 1.08E-01 | 1.47E-01 |
| KCNT2  | -0.04254 | 3.35E-01 | 4.01E-01 |
| KCNU1  | 0.031535 | 4.75E-01 | 5.41E-01 |
| KCNV1  | 0.239621 | 3.69E-08 | 1.32E-07 |
| KCNV2  | -0.008   | 8.56E-01 | 8.83E-01 |
| KCP    | 0.291819 | 1.44E-11 | 7.46E-11 |
| KCTD10 | -0.1038  | 1.85E-02 | 2.98E-02 |
| KCTD11 | -0.11789 | 7.40E-03 | 1.29E-02 |
| KCTD12 | -0.11929 | 6.72E-03 | 1.18E-02 |
| KCTD13 | -0.03107 | 4.82E-01 | 5.47E-01 |
| KCTD14 | -0.09865 | 2.52E-02 | 3.95E-02 |
| KCTD15 | -0.0883  | 4.52E-02 | 6.73E-02 |
| KCTD16 | -0.11986 | 6.46E-03 | 1.14E-02 |
| KCTD17 | 0.125811 | 4.24E-03 | 7.71E-03 |
| KCTD18 | -0.31765 | 1.55E-13 | 9.84E-13 |
| KCTD19 | -0.17477 | 6.68E-05 | 1.60E-04 |
| KCTD1  | -0.07719 | 8.01E-02 | 1.13E-01 |
| KCTD20 | 0.139202 | 1.54E-03 | 3.00E-03 |
| KCTD21 | -0.06647 | 1.32E-01 | 1.77E-01 |
| KCTD2  | -0.18418 | 2.60E-05 | 6.58E-05 |
| KCTD3  | 0.226205 | 2.12E-07 | 7.00E-07 |
| KCTD4  | 0.09945  | 2.40E-02 | 3.78E-02 |
| KCTD5  | 0.28605  | 3.73E-11 | 1.84E-10 |
| KCTD6  | 0.16817  | 1.26E-04 | 2.89E-04 |
| KCTD7  | -0.32302 | 5.69E-14 | 3.78E-13 |
| KCTD8  | -0.05275 | 2.32E-01 | 2.90E-01 |
| KCTD9  | 0.126042 | 4.17E-03 | 7.59E-03 |
| KDELC1 | 0.271411 | 3.79E-10 | 1.71E-09 |
| KDELC2 | 0.330433 | 1.38E-14 | 9.70E-14 |
| KDELR1 | 0.095034 | 3.11E-02 | 4.78E-02 |
| KDELR2 | 0.170501 | 1.01E-04 | 2.35E-04 |
| KDELR3 | 0.071087 | 1.07E-01 | 1.46E-01 |
| KDM1A  | 0.370513 | 3.34E-18 | 3.31E-17 |
| KDM1B  | 0.069746 | 1.14E-01 | 1.55E-01 |
| KDM2A  | -0.00166 | 9.70E-01 | 9.77E-01 |
| KDM2B  | 0.112271 | 1.08E-02 | 1.82E-02 |
| KDM3A  | 0.244286 | 1.96E-08 | 7.22E-08 |
| KDM3B  | -0.22898 | 1.49E-07 | 5.00E-07 |
| KDM4A  | -0.121   | 5.97E-03 | 1.06E-02 |
| KDM4B  | -0.04239 | 3.37E-01 | 4.02E-01 |
| KDM4C  | -0.21616 | 7.34E-07 | 2.26E-06 |

|           |          |           |           |
|-----------|----------|-----------|-----------|
| KDM4DL    | -0.03428 | 4.38E-01  | 5.04E-01  |
| KDM4D     | 0.000701 | 9.87E-01  | 9.90E-01  |
| KDM5A     | 0.093363 | 3.42E-02  | 5.21E-02  |
| KDM5B     | -0.02229 | 6.14E-01  | 6.70E-01  |
| KDM5C     | -0.06619 | 1.34E-01  | 1.79E-01  |
| KDM5D     | 0.007086 | 8.73E-01  | 8.96E-01  |
| KDM6A     | -0.14579 | 9.06E-04  | 1.83E-03  |
| KDM6B     | -0.24375 | 2.11E-08  | 7.74E-08  |
| KDR       | -0.15497 | 4.16E-04  | 8.84E-04  |
| KDSR      | -0.03257 | 4.61E-01  | 5.27E-01  |
| KEAP1     | -0.04708 | 2.86E-01  | 3.49E-01  |
| KEL       | -0.05126 | 2.46E-01  | 3.06E-01  |
| KERA      | -0.05688 | 1.98E-01  | 2.52E-01  |
| KGFLP1    | -0.09136 | 3.82E-02  | 5.77E-02  |
| KGFLP2    | -0.16215 | 2.20E-04  | 4.88E-04  |
| KHDC1L    | 0.263345 | 1.29E-09  | 5.43E-09  |
| KHDC1     | 0.201124 | 4.22E-06  | 1.19E-05  |
| KHDRBS1   | 0.424507 | 6.03E-24  | 9.83E-23  |
| KHDRBS2   | -0.22887 | 1.51E-07  | 5.07E-07  |
| KHDRBS3   | -0.21726 | 6.43E-07  | 2.00E-06  |
| KHK       | 0.187078 | 1.93E-05  | 4.97E-05  |
| KHNYN     | -0.02311 | 6.01E-01  | 6.58E-01  |
| KHSRP     | 0.359889 | 3.41E-17  | 3.12E-16  |
| KIAA0020  | 0.272888 | 3.02E-10  | 1.38E-09  |
| KIAA0040  | -0.27263 | 3.14E-10  | 1.43E-09  |
| KIAA0087  | -0.17042 | 1.02E-04  | 2.37E-04  |
| KIAA0090  | 0.390639 | 3.20E-20  | 3.81E-19  |
| KIAA0100  | 0.044007 | 3.19E-01  | 3.84E-01  |
| KIAA0101  | 0.808311 | 4.13E-120 | 9.82E-118 |
| KIAA0114  | -0.05273 | 2.32E-01  | 2.91E-01  |
| KIAA0125  | -0.10524 | 1.69E-02  | 2.75E-02  |
| KIAA0141  | -0.4676  | 2.45E-29  | 6.02E-28  |
| KIAA0146  | -0.15072 | 6.00E-04  | 1.25E-03  |
| KIAA0174  | -0.1825  | 3.09E-05  | 7.73E-05  |
| KIAA0182  | -0.13345 | 2.41E-03  | 4.55E-03  |
| KIAA0195  | -0.13342 | 2.41E-03  | 4.56E-03  |
| KIAA0196  | 0.171383 | 9.28E-05  | 2.17E-04  |
| KIAA0226  | 0.100779 | 2.22E-02  | 3.52E-02  |
| KIAA0232  | -0.268   | 6.39E-10  | 2.80E-09  |
| KIAA0240  | -0.36651 | 8.09E-18  | 7.75E-17  |
| KIAA0247  | -0.29293 | 1.19E-11  | 6.24E-11  |
| KIAA0284  | -0.14682 | 8.32E-04  | 1.69E-03  |
| KIAA0317  | 0.167323 | 1.36E-04  | 3.11E-04  |
| KIAA0319L | -0.49235 | 8.44E-33  | 2.57E-31  |

|            |          |          |          |
|------------|----------|----------|----------|
| KIAA0319   | 0.106189 | 1.59E-02 | 2.60E-02 |
| KIAA0355   | -0.15193 | 5.41E-04 | 1.13E-03 |
| KIAA0368   | -0.05924 | 1.79E-01 | 2.32E-01 |
| KIAA0391   | 0.207628 | 2.01E-06 | 5.88E-06 |
| KIAA0406   | 0.424919 | 5.40E-24 | 8.84E-23 |
| KIAA0408   | -0.47372 | 3.62E-30 | 9.41E-29 |
| KIAA0415   | 0.029718 | 5.01E-01 | 5.65E-01 |
| KIAA0427   | -0.27693 | 1.61E-10 | 7.51E-10 |
| KIAA0430   | -0.48492 | 9.90E-32 | 2.85E-30 |
| KIAA0467   | -0.34371 | 1.00E-15 | 7.81E-15 |
| KIAA0494   | -0.46905 | 1.56E-29 | 3.90E-28 |
| KIAA0495   | -0.38331 | 1.80E-19 | 2.01E-18 |
| KIAA0513   | -0.43397 | 4.59E-25 | 8.13E-24 |
| KIAA0528   | 0.108902 | 1.34E-02 | 2.23E-02 |
| KIAA0556   | -0.24801 | 1.17E-08 | 4.42E-08 |
| KIAA0562   | -0.22157 | 3.79E-07 | 1.21E-06 |
| KIAA0564   | -0.20001 | 4.78E-06 | 1.34E-05 |
| KIAA0586   | 0.203566 | 3.20E-06 | 9.15E-06 |
| KIAA0649   | -0.26088 | 1.85E-09 | 7.67E-09 |
| KIAA0652   | 0.001036 | 9.81E-01 | 9.86E-01 |
| KIAA0664P3 | -0.34989 | 2.82E-16 | 2.33E-15 |
| KIAA0664   | -0.04831 | 2.74E-01 | 3.36E-01 |
| KIAA0748   | -0.24955 | 9.44E-09 | 3.61E-08 |
| KIAA0753   | -0.24695 | 1.36E-08 | 5.08E-08 |
| KIAA0754   | 0.019185 | 6.64E-01 | 7.16E-01 |
| KIAA0776   | -0.05513 | 2.12E-01 | 2.68E-01 |
| KIAA0802   | 0.150324 | 6.20E-04 | 1.29E-03 |
| KIAA0831   | -0.12939 | 3.27E-03 | 6.05E-03 |
| KIAA0892   | -0.33097 | 1.25E-14 | 8.77E-14 |
| KIAA0895L  | -0.23775 | 4.74E-08 | 1.67E-07 |
| KIAA0895   | 0.13373  | 2.36E-03 | 4.46E-03 |
| KIAA0907   | -0.06707 | 1.28E-01 | 1.72E-01 |
| KIAA0913   | -0.26471 | 1.05E-09 | 4.47E-09 |
| KIAA0922   | 0.026546 | 5.48E-01 | 6.10E-01 |
| KIAA0947   | 0.16056  | 2.54E-04 | 5.58E-04 |
| KIAA1009   | -0.1605  | 2.55E-04 | 5.60E-04 |
| KIAA1012   | 0.027249 | 5.37E-01 | 6.00E-01 |
| KIAA1024   | 0.149916 | 6.42E-04 | 1.33E-03 |
| KIAA1033   | 0.296049 | 7.06E-12 | 3.79E-11 |
| KIAA1045   | -0.09122 | 3.85E-02 | 5.81E-02 |
| KIAA1107   | 0.034015 | 4.41E-01 | 5.08E-01 |
| KIAA1109   | -0.39482 | 1.17E-20 | 1.45E-19 |
| KIAA1143   | -0.17168 | 9.01E-05 | 2.11E-04 |
| KIAA1147   | -0.07402 | 9.34E-02 | 1.30E-01 |

|           |          |           |           |
|-----------|----------|-----------|-----------|
| KIAA1161  | 0.078152 | 7.64E-02  | 1.08E-01  |
| KIAA1191  | -0.19937 | 5.13E-06  | 1.43E-05  |
| KIAA1199  | 0.099509 | 2.39E-02  | 3.77E-02  |
| KIAA1210  | 0.006462 | 8.84E-01  | 9.06E-01  |
| KIAA1211  | 0.208662 | 1.78E-06  | 5.25E-06  |
| KIAA1217  | -0.1997  | 4.95E-06  | 1.38E-05  |
| KIAA1239  | 0.244951 | 1.79E-08  | 6.62E-08  |
| KIAA1244  | -0.26482 | 1.03E-09  | 4.40E-09  |
| KIAA1257  | -0.03803 | 3.89E-01  | 4.56E-01  |
| KIAA1267  | -0.16341 | 1.96E-04  | 4.38E-04  |
| KIAA1274  | -0.25963 | 2.23E-09  | 9.13E-09  |
| KIAA1279  | 0.132379 | 2.61E-03  | 4.91E-03  |
| KIAA1310  | -0.13674 | 1.87E-03  | 3.60E-03  |
| KIAA1324L | -0.17804 | 4.85E-05  | 1.18E-04  |
| KIAA1324  | -0.33864 | 2.77E-15  | 2.07E-14  |
| KIAA1328  | -0.36877 | 4.91E-18  | 4.79E-17  |
| KIAA1370  | -0.31555 | 2.27E-13  | 1.42E-12  |
| KIAA1377  | -0.12054 | 6.17E-03  | 1.09E-02  |
| KIAA1383  | -0.06944 | 1.15E-01  | 1.57E-01  |
| KIAA1407  | -0.32969 | 1.60E-14  | 1.11E-13  |
| KIAA1409  | -0.06484 | 1.42E-01  | 1.88E-01  |
| KIAA1429  | 0.241161 | 3.00E-08  | 1.08E-07  |
| KIAA1430  | -0.07294 | 9.82E-02  | 1.35E-01  |
| KIAA1432  | 0.088278 | 4.52E-02  | 6.73E-02  |
| KIAA1462  | -0.07632 | 8.36E-02  | 1.17E-01  |
| KIAA1467  | 0.09232  | 3.62E-02  | 5.50E-02  |
| KIAA1468  | 0.017651 | 6.89E-01  | 7.39E-01  |
| KIAA1486  | -0.08094 | 6.64E-02  | 9.56E-02  |
| KIAA1522  | -0.20886 | 1.74E-06  | 5.14E-06  |
| KIAA1524  | 0.83951  | 5.20E-138 | 1.86E-135 |
| KIAA1529  | -0.35836 | 4.73E-17  | 4.26E-16  |
| KIAA1530  | -0.11747 | 7.62E-03  | 1.32E-02  |
| KIAA1539  | -0.00716 | 8.71E-01  | 8.95E-01  |
| KIAA1543  | -0.24453 | 1.89E-08  | 7.00E-08  |
| KIAA1549  | 0.029446 | 5.05E-01  | 5.69E-01  |
| KIAA1586  | 0.197062 | 6.62E-06  | 1.81E-05  |
| KIAA1598  | 0.016332 | 7.12E-01  | 7.59E-01  |
| KIAA1609  | 0.229429 | 1.41E-07  | 4.74E-07  |
| KIAA1614  | -0.02336 | 5.97E-01  | 6.55E-01  |
| KIAA1632  | -0.12472 | 4.59E-03  | 8.29E-03  |
| KIAA1644  | -0.06981 | 1.14E-01  | 1.54E-01  |
| KIAA1671  | -0.41549 | 6.51E-23  | 9.65E-22  |
| KIAA1683  | -0.40796 | 4.50E-22  | 6.24E-21  |
| KIAA1704  | 0.032335 | 4.64E-01  | 5.30E-01  |

|           |          |           |           |
|-----------|----------|-----------|-----------|
| KIAA1712  | 0.011193 | 8.00E-01  | 8.35E-01  |
| KIAA1715  | 0.349815 | 2.86E-16  | 2.36E-15  |
| KIAA1731  | 0.226313 | 2.09E-07  | 6.90E-07  |
| KIAA1737  | -0.24358 | 2.16E-08  | 7.90E-08  |
| KIAA1751  | -0.20277 | 3.51E-06  | 9.96E-06  |
| KIAA1755  | -0.09921 | 2.43E-02  | 3.83E-02  |
| KIAA1797  | -0.03811 | 3.88E-01  | 4.55E-01  |
| KIAA1804  | -0.10298 | 1.94E-02  | 3.12E-02  |
| KIAA1826  | -0.12646 | 4.05E-03  | 7.38E-03  |
| KIAA1841  | 0.23999  | 3.51E-08  | 1.26E-07  |
| KIAA1875  | -0.14204 | 1.23E-03  | 2.44E-03  |
| KIAA1908  | -0.34149 | 1.56E-15  | 1.20E-14  |
| KIAA1919  | 0.087631 | 4.68E-02  | 6.95E-02  |
| KIAA1949  | 0.285367 | 4.17E-11  | 2.05E-10  |
| KIAA1958  | 0.008476 | 8.48E-01  | 8.75E-01  |
| KIAA1967  | -0.02633 | 5.51E-01  | 6.13E-01  |
| KIAA1984  | -0.2861  | 3.70E-11  | 1.83E-10  |
| KIAA2013  | 0.103551 | 1.87E-02  | 3.02E-02  |
| KIAA2018  | -0.17893 | 4.43E-05  | 1.09E-04  |
| KIAA2022  | -0.41036 | 2.45E-22  | 3.46E-21  |
| KIAA2026  | -0.21129 | 1.31E-06  | 3.91E-06  |
| KIDINS220 | -0.18437 | 2.55E-05  | 6.47E-05  |
| KIF11     | 0.861157 | 7.38E-153 | 4.47E-150 |
| KIF12     | -0.39605 | 8.67E-21  | 1.09E-19  |
| KIF13A    | -0.31172 | 4.55E-13  | 2.77E-12  |
| KIF13B    | -0.21626 | 7.25E-07  | 2.24E-06  |
| KIF14     | 0.810296 | 3.77E-121 | 9.20E-119 |
| KIF15     | 0.848813 | 4.18E-144 | 1.90E-141 |
| KIF16B    | -0.36262 | 1.89E-17  | 1.76E-16  |
| KIF17     | -0.13923 | 1.54E-03  | 3.00E-03  |
| KIF18A    | 0.753761 | 1.35E-95  | 2.00E-93  |
| KIF18B    | 0.827673 | 8.51E-131 | 2.50E-128 |
| KIF19     | -0.13117 | 2.86E-03  | 5.34E-03  |
| KIF1A     | 0.223579 | 2.95E-07  | 9.57E-07  |
| KIF1B     | 0.018624 | 6.73E-01  | 7.24E-01  |
| KIF1C     | -0.46184 | 1.43E-28  | 3.31E-27  |
| KIF20A    | 0.840323 | 1.58E-138 | 5.75E-136 |
| KIF20B    | 0.714137 | 1.70E-81  | 2.12E-79  |
| KIF21A    | 0.161947 | 2.24E-04  | 4.96E-04  |
| KIF21B    | -0.00796 | 8.57E-01  | 8.83E-01  |
| KIF22     | 0.360551 | 2.96E-17  | 2.72E-16  |
| KIF23     | 0.878357 | 1.42E-166 | 1.58E-163 |
| KIF24     | 0.520465 | 4.32E-37  | 1.66E-35  |
| KIF25     | -0.10366 | 1.86E-02  | 3.00E-02  |

|         |          |           |           |
|---------|----------|-----------|-----------|
| KIF26A  | -0.20759 | 2.02E-06  | 5.90E-06  |
| KIF26B  | 0.020921 | 6.36E-01  | 6.91E-01  |
| KIF27   | -0.19847 | 5.67E-06  | 1.57E-05  |
| KIF2A   | 0.365708 | 9.65E-18  | 9.19E-17  |
| KIF2C   | 0.871724 | 4.73E-161 | 4.51E-158 |
| KIF3A   | -0.1988  | 5.47E-06  | 1.52E-05  |
| KIF3B   | 0.105179 | 1.70E-02  | 2.76E-02  |
| KIF3C   | 0.447922 | 8.84E-27  | 1.79E-25  |
| KIF4A   | 0.888827 | 5.49E-176 | 1.22E-172 |
| KIF4B   | 0.689083 | 9.19E-74  | 1.01E-71  |
| KIF5A   | 0.142638 | 1.17E-03  | 2.33E-03  |
| KIF5B   | 0.209234 | 1.67E-06  | 4.92E-06  |
| KIF5C   | 0.126565 | 4.02E-03  | 7.33E-03  |
| KIF6    | -0.43529 | 3.18E-25  | 5.72E-24  |
| KIF7    | 0.048625 | 2.71E-01  | 3.33E-01  |
| KIF9    | -0.32035 | 9.37E-14  | 6.08E-13  |
| KIFAP3  | -0.12083 | 6.04E-03  | 1.07E-02  |
| KIFC1   | 0.843966 | 7.02E-141 | 2.86E-138 |
| KIFC2   | -0.02748 | 5.34E-01  | 5.97E-01  |
| KIFC3   | -0.20732 | 2.09E-06  | 6.07E-06  |
| KILLIN  | -0.19997 | 4.80E-06  | 1.34E-05  |
| KIN     | 0.203828 | 3.11E-06  | 8.89E-06  |
| KIR2DL1 | 0.100188 | 2.30E-02  | 3.64E-02  |
| KIR2DL3 | 0.193735 | 9.52E-06  | 2.55E-05  |
| KIR2DL4 | 0.380305 | 3.62E-19  | 3.91E-18  |
| KIR2DS4 | 0.126436 | 4.06E-03  | 7.39E-03  |
| KIR3DL1 | 0.092503 | 3.58E-02  | 5.45E-02  |
| KIR3DL2 | 0.1682   | 1.25E-04  | 2.89E-04  |
| KIR3DL3 | 0.15124  | 5.74E-04  | 1.20E-03  |
| KIR3DP1 | 0.081813 | 6.36E-02  | 9.19E-02  |
| KIR3DX1 | 0.165937 | 1.55E-04  | 3.51E-04  |
| KIRREL2 | 0.148534 | 7.21E-04  | 1.48E-03  |
| KIRREL3 | -0.07224 | 1.02E-01  | 1.39E-01  |
| KIRREL  | -0.0799  | 7.00E-02  | 1.00E-01  |
| KISS1R  | 0.241658 | 2.80E-08  | 1.02E-07  |
| KISS1   | -0.04479 | 3.10E-01  | 3.75E-01  |
| KITLG   | -0.1587  | 3.00E-04  | 6.52E-04  |
| KIT     | -0.28249 | 6.64E-11  | 3.21E-10  |
| KLB     | -0.2068  | 2.21E-06  | 6.43E-06  |
| KLC1    | 0.01165  | 7.92E-01  | 8.28E-01  |
| KLC2    | 0.214574 | 8.88E-07  | 2.70E-06  |
| KLC3    | 0.232165 | 9.88E-08  | 3.38E-07  |
| KLC4    | -0.43381 | 4.80E-25  | 8.47E-24  |
| KLF10   | 0.032231 | 4.65E-01  | 5.31E-01  |

|         |          |          |          |
|---------|----------|----------|----------|
| KLF11   | -0.04328 | 3.27E-01 | 3.92E-01 |
| KLF12   | -0.10053 | 2.25E-02 | 3.57E-02 |
| KLF13   | -0.2865  | 3.47E-11 | 1.72E-10 |
| KLF14   | 0.149632 | 6.58E-04 | 1.36E-03 |
| KLF15   | -0.53838 | 4.83E-40 | 2.26E-38 |
| KLF16   | 0.232695 | 9.23E-08 | 3.16E-07 |
| KLF17   | -0.02739 | 5.35E-01 | 5.98E-01 |
| KLF1    | 0.273633 | 2.69E-10 | 1.23E-09 |
| KLF2    | -0.41625 | 5.34E-23 | 8.00E-22 |
| KLF3    | -0.03997 | 3.65E-01 | 4.32E-01 |
| KLF4    | 0.006975 | 8.75E-01 | 8.98E-01 |
| KLF5    | -0.14626 | 8.71E-04 | 1.77E-03 |
| KLF6    | -0.00835 | 8.50E-01 | 8.77E-01 |
| KLF7    | 0.11891  | 6.90E-03 | 1.21E-02 |
| KLF8    | -0.20254 | 3.60E-06 | 1.02E-05 |
| KLF9    | -0.32165 | 7.35E-14 | 4.82E-13 |
| KLHDC10 | 0.028137 | 5.24E-01 | 5.88E-01 |
| KLHDC1  | -0.54185 | 1.23E-40 | 5.92E-39 |
| KLHDC2  | -0.33372 | 7.32E-15 | 5.27E-14 |
| KLHDC3  | 0.073569 | 9.54E-02 | 1.32E-01 |
| KLHDC4  | -0.1355  | 2.06E-03 | 3.93E-03 |
| KLHDC5  | 0.217836 | 5.99E-07 | 1.87E-06 |
| KLHDC7A | -0.38143 | 2.79E-19 | 3.05E-18 |
| KLHDC7B | 0.204749 | 2.80E-06 | 8.04E-06 |
| KLHDC8A | -0.13463 | 2.20E-03 | 4.18E-03 |
| KLHDC8B | -0.39723 | 6.51E-21 | 8.21E-20 |
| KLHDC9  | -0.30725 | 1.01E-12 | 5.94E-12 |
| KLHL10  | 0.04858  | 2.71E-01 | 3.33E-01 |
| KLHL11  | 0.025945 | 5.57E-01 | 6.18E-01 |
| KLHL12  | -0.00555 | 9.00E-01 | 9.19E-01 |
| KLHL13  | 0.036489 | 4.09E-01 | 4.75E-01 |
| KLHL14  | -0.07174 | 1.04E-01 | 1.42E-01 |
| KLHL15  | 0.120401 | 6.23E-03 | 1.10E-02 |
| KLHL17  | -0.03    | 4.97E-01 | 5.62E-01 |
| KLHL18  | 0.078753 | 7.42E-02 | 1.06E-01 |
| KLHL1   | 0.126946 | 3.91E-03 | 7.14E-03 |
| KLHL20  | -0.29517 | 8.19E-12 | 4.36E-11 |
| KLHL21  | -0.26351 | 1.25E-09 | 5.30E-09 |
| KLHL22  | -0.11459 | 9.25E-03 | 1.58E-02 |
| KLHL23  | 0.22395  | 2.82E-07 | 9.16E-07 |
| KLHL24  | -0.15345 | 4.75E-04 | 1.00E-03 |
| KLHL25  | 0.095025 | 3.11E-02 | 4.78E-02 |
| KLHL26  | -0.3509  | 2.28E-16 | 1.91E-15 |
| KLHL28  | -0.03357 | 4.47E-01 | 5.13E-01 |



|        |          |          |          |
|--------|----------|----------|----------|
| KLHL29 | -0.19142 | 1.22E-05 | 3.23E-05 |
| KLHL2  | 0.045468 | 3.03E-01 | 3.67E-01 |
| KLHL30 | -0.18649 | 2.05E-05 | 5.26E-05 |
| KLHL31 | 0.267158 | 7.26E-10 | 3.16E-09 |
| KLHL32 | -0.26403 | 1.16E-09 | 4.93E-09 |
| KLHL33 | -0.37662 | 8.42E-19 | 8.80E-18 |
| KLHL34 | 0.049015 | 2.67E-01 | 3.29E-01 |
| KLHL35 | -0.10908 | 1.33E-02 | 2.20E-02 |
| KLHL36 | 0.023116 | 6.01E-01 | 6.58E-01 |
| KLHL38 | -0.18997 | 1.42E-05 | 3.73E-05 |
| KLHL3  | -0.21531 | 8.12E-07 | 2.49E-06 |
| KLHL4  | -0.05866 | 1.84E-01 | 2.37E-01 |
| KLHL5  | 0.405692 | 7.98E-22 | 1.08E-20 |
| KLHL6  | -0.14695 | 8.23E-04 | 1.68E-03 |
| KLHL7  | 0.242916 | 2.36E-08 | 8.63E-08 |
| KLHL8  | -0.0856  | 5.22E-02 | 7.67E-02 |
| KLHL9  | -0.08634 | 5.02E-02 | 7.40E-02 |
| KLK10  | -0.08141 | 6.49E-02 | 9.36E-02 |
| KLK11  | -0.23329 | 8.54E-08 | 2.94E-07 |
| KLK12  | 0.061881 | 1.61E-01 | 2.10E-01 |
| KLK13  | -0.09621 | 2.90E-02 | 4.49E-02 |
| KLK14  | 0.055531 | 2.08E-01 | 2.64E-01 |
| KLK15  | 0.168461 | 1.22E-04 | 2.82E-04 |
| KLK1   | 0.199272 | 5.19E-06 | 1.44E-05 |
| KLK2   | 0.274827 | 2.24E-10 | 1.03E-09 |
| KLK3   | 0.085359 | 5.29E-02 | 7.76E-02 |
| KLK4   | 0.100795 | 2.22E-02 | 3.52E-02 |
| KLK5   | 0.078391 | 7.55E-02 | 1.07E-01 |
| KLK6   | 0.272504 | 3.21E-10 | 1.45E-09 |
| KLK7   | -0.01455 | 7.42E-01 | 7.85E-01 |
| KLK8   | 0.166249 | 1.51E-04 | 3.42E-04 |
| KLK9   | 0.206452 | 2.30E-06 | 6.67E-06 |
| KLKB1  | -0.22646 | 2.06E-07 | 6.78E-07 |
| KLKP1  | 0.12546  | 4.35E-03 | 7.89E-03 |
| KLRA1  | -0.13913 | 1.55E-03 | 3.02E-03 |
| KLRAQ1 | -0.08545 | 5.26E-02 | 7.73E-02 |
| KLRB1  | -0.2299  | 1.32E-07 | 4.47E-07 |
| KLRC1  | 0.233165 | 8.68E-08 | 2.98E-07 |
| KLRC2  | 0.3259   | 3.30E-14 | 2.24E-13 |
| KLRC3  | 0.319118 | 1.18E-13 | 7.57E-13 |
| KLRC4  | 0.145897 | 8.98E-04 | 1.82E-03 |
| KLRD1  | 0.207549 | 2.03E-06 | 5.93E-06 |
| KLRF1  | 0.026288 | 5.52E-01 | 6.13E-01 |
| KLRG1  | -0.15849 | 3.05E-04 | 6.63E-04 |

|         |          |           |           |
|---------|----------|-----------|-----------|
| KLRG2   | -0.11249 | 1.06E-02  | 1.80E-02  |
| KLRK1   | 0.018892 | 6.69E-01  | 7.20E-01  |
| KL      | -0.28923 | 2.21E-11  | 1.12E-10  |
| KMO     | 0.091887 | 3.71E-02  | 5.62E-02  |
| KNCN    | -0.09231 | 3.62E-02  | 5.50E-02  |
| KNDC1   | -0.38086 | 3.19E-19  | 3.46E-18  |
| KNG1    | 0.060096 | 1.73E-01  | 2.25E-01  |
| KNTC1   | 0.648501 | 8.84E-63  | 8.26E-61  |
| KPNA1   | 0.416296 | 5.28E-23  | 7.92E-22  |
| KPNA2   | 0.84636  | 1.85E-142 | 8.21E-140 |
| KPNA3   | 0.2487   | 1.06E-08  | 4.04E-08  |
| KPNA4   | 0.560526 | 6.06E-44  | 3.38E-42  |
| KPNA5   | -0.07402 | 9.33E-02  | 1.30E-01  |
| KPNA6   | -0.0055  | 9.01E-01  | 9.20E-01  |
| KPNA7   | 0.007786 | 8.60E-01  | 8.86E-01  |
| KPNB1   | 0.559549 | 9.14E-44  | 5.02E-42  |
| KPRP    | 0.102714 | 1.97E-02  | 3.16E-02  |
| KPTN    | 0.173954 | 7.24E-05  | 1.72E-04  |
| KRAS    | 0.255983 | 3.78E-09  | 1.51E-08  |
| KRBA1   | -0.14985 | 6.46E-04  | 1.34E-03  |
| KRBA2   | -0.2064  | 2.32E-06  | 6.71E-06  |
| KRCC1   | -0.12996 | 3.13E-03  | 5.81E-03  |
| KREMEN1 | -0.17268 | 8.19E-05  | 1.93E-04  |
| KREMEN2 | 0.358811 | 4.30E-17  | 3.89E-16  |
| KRI1    | 0.067909 | 1.24E-01  | 1.67E-01  |
| KRIT1   | 0.085591 | 5.22E-02  | 7.67E-02  |
| KRR1    | 0.470169 | 1.10E-29  | 2.78E-28  |
| KRT10   | 0.138874 | 1.58E-03  | 3.08E-03  |
| KRT12   | 0.099944 | 2.33E-02  | 3.68E-02  |
| KRT13   | -0.13484 | 2.17E-03  | 4.12E-03  |
| KRT14   | 0.068384 | 1.21E-01  | 1.64E-01  |
| KRT15   | -0.08807 | 4.58E-02  | 6.81E-02  |
| KRT16   | 0.231363 | 1.10E-07  | 3.73E-07  |
| KRT17   | 0.040948 | 3.54E-01  | 4.20E-01  |
| KRT18   | 0.233936 | 7.85E-08  | 2.71E-07  |
| KRT19   | 0.118756 | 6.98E-03  | 1.22E-02  |
| KRT1    | -0.24667 | 1.41E-08  | 5.28E-08  |
| KRT20   | 0.046629 | 2.91E-01  | 3.54E-01  |
| KRT222  | -0.05306 | 2.29E-01  | 2.88E-01  |
| KRT23   | 0.047258 | 2.84E-01  | 3.47E-01  |
| KRT24   | -0.04573 | 3.00E-01  | 3.64E-01  |
| KRT25   | 0.086156 | 5.07E-02  | 7.47E-02  |
| KRT26   | 0.0326   | 4.60E-01  | 5.26E-01  |
| KRT27   | -0.29861 | 4.56E-12  | 2.50E-11  |

|            |          |          |          |
|------------|----------|----------|----------|
| KRT28      | 0.045769 | 3.00E-01 | 3.63E-01 |
| KRT2       | -0.03308 | 4.54E-01 | 5.20E-01 |
| KRT31      | 0.10215  | 2.04E-02 | 3.26E-02 |
| KRT32      | -0.04239 | 3.37E-01 | 4.02E-01 |
| KRT33A     | 0.077587 | 7.86E-02 | 1.11E-01 |
| KRT33B     | -0.09106 | 3.89E-02 | 5.86E-02 |
| KRT34      | 0.16813  | 1.26E-04 | 2.90E-04 |
| KRT35      | 0.051006 | 2.48E-01 | 3.08E-01 |
| KRT36      | 0.12388  | 4.87E-03 | 8.77E-03 |
| KRT37      | 0.119407 | 6.67E-03 | 1.17E-02 |
| KRT38      | 0.08317  | 5.93E-02 | 8.61E-02 |
| KRT39      | 0.003065 | 9.45E-01 | 9.57E-01 |
| KRT3       | 0.047809 | 2.79E-01 | 3.41E-01 |
| KRT40      | 0.05244  | 2.35E-01 | 2.94E-01 |
| KRT4       | -0.14164 | 1.27E-03 | 2.51E-03 |
| KRT5       | -0.06766 | 1.25E-01 | 1.68E-01 |
| KRT6A      | 0.193134 | 1.02E-05 | 2.71E-05 |
| KRT6B      | 0.210884 | 1.38E-06 | 4.10E-06 |
| KRT6C      | 0.190338 | 1.37E-05 | 3.60E-05 |
| KRT71      | -0.05965 | 1.76E-01 | 2.29E-01 |
| KRT72      | -0.1346  | 2.20E-03 | 4.19E-03 |
| KRT73      | -0.15359 | 4.69E-04 | 9.89E-04 |
| KRT74      | 0.02525  | 5.68E-01 | 6.27E-01 |
| KRT75      | 0.094269 | 3.24E-02 | 4.98E-02 |
| KRT76      | 0.080072 | 6.94E-02 | 9.95E-02 |
| KRT77      | 0.081737 | 6.38E-02 | 9.22E-02 |
| KRT78      | 0.224367 | 2.67E-07 | 8.72E-07 |
| KRT79      | -0.16532 | 1.64E-04 | 3.71E-04 |
| KRT7       | 0.026877 | 5.43E-01 | 6.05E-01 |
| KRT80      | 0.25676  | 3.38E-09 | 1.36E-08 |
| KRT81      | 0.109469 | 1.29E-02 | 2.15E-02 |
| KRT82      | 0.048217 | 2.75E-01 | 3.37E-01 |
| KRT83      | 0.125117 | 4.46E-03 | 8.07E-03 |
| KRT84      | -0.02512 | 5.69E-01 | 6.29E-01 |
| KRT85      | 0.101838 | 2.08E-02 | 3.32E-02 |
| KRT86      | 0.088594 | 4.45E-02 | 6.63E-02 |
| KRT8       | 0.22127  | 3.93E-07 | 1.26E-06 |
| KRT9       | 0.107024 | 1.51E-02 | 2.48E-02 |
| KRTAP1-1   | 0.064428 | 1.44E-01 | 1.91E-01 |
| KRTAP1-3   | 0.115177 | 8.89E-03 | 1.52E-02 |
| KRTAP1-5   | -0.01719 | 6.97E-01 | 7.46E-01 |
| KRTAP10-10 | 0.01096  | 8.04E-01 | 8.38E-01 |
| KRTAP10-11 | 0.051255 | 2.46E-01 | 3.06E-01 |
| KRTAP10-12 | -0.08141 | 6.49E-02 | 9.36E-02 |

|           |          |          |          |
|-----------|----------|----------|----------|
| KRTAP10-1 | -0.03101 | 4.83E-01 | 5.48E-01 |
| KRTAP10-2 | 0.021937 | 6.19E-01 | 6.76E-01 |
| KRTAP10-3 | -0.02381 | 5.90E-01 | 6.48E-01 |
| KRTAP10-4 | 0.135319 | 2.09E-03 | 3.98E-03 |
| KRTAP10-5 | 0.030865 | 4.85E-01 | 5.50E-01 |
| KRTAP10-6 | 0.159116 | 2.89E-04 | 6.29E-04 |
| KRTAP10-7 | 0.039576 | 3.70E-01 | 4.36E-01 |
| KRTAP10-9 | 0.073324 | 9.65E-02 | 1.33E-01 |
| KRTAP11-1 | -0.04378 | 3.21E-01 | 3.86E-01 |
| KRTAP12-1 | 0.069508 | 1.15E-01 | 1.56E-01 |
| KRTAP12-2 | 0.052807 | 2.32E-01 | 2.90E-01 |
| KRTAP12-4 | -0.03372 | 4.45E-01 | 5.12E-01 |
| KRTAP13-1 | -0.06203 | 1.60E-01 | 2.09E-01 |
| KRTAP13-2 | -0.09702 | 2.77E-02 | 4.30E-02 |
| KRTAP13-4 | -0.10192 | 2.07E-02 | 3.30E-02 |
| KRTAP17-1 | 0.053381 | 2.27E-01 | 2.84E-01 |
| KRTAP19-1 | 0.010011 | 8.21E-01 | 8.52E-01 |
| KRTAP19-3 | 0.025605 | 5.62E-01 | 6.23E-01 |
| KRTAP19-5 | 0.013401 | 7.62E-01 | 8.02E-01 |
| KRTAP19-8 | 0.000442 | 9.92E-01 | 9.94E-01 |
| KRTAP2-1  | 0.102238 | 2.03E-02 | 3.25E-02 |
| KRTAP2-2  | -0.0262  | 5.53E-01 | 6.14E-01 |
| KRTAP20-4 | 0.039144 | 3.75E-01 | 4.41E-01 |
| KRTAP21-2 | 0.041862 | 3.43E-01 | 4.09E-01 |
| KRTAP26-1 | -0.07219 | 1.02E-01 | 1.40E-01 |
| KRTAP3-1  | 0.131086 | 2.88E-03 | 5.37E-03 |
| KRTAP3-2  | 0.043183 | 3.28E-01 | 3.93E-01 |
| KRTAP3-3  | 0.063987 | 1.47E-01 | 1.94E-01 |
| KRTAP4-11 | -0.02776 | 5.30E-01 | 5.93E-01 |
| KRTAP4-12 | 0.049215 | 2.65E-01 | 3.26E-01 |
| KRTAP4-1  | 0.019613 | 6.57E-01 | 7.10E-01 |
| KRTAP4-2  | -0.04068 | 3.57E-01 | 4.23E-01 |
| KRTAP4-3  | 0.022525 | 6.10E-01 | 6.67E-01 |
| KRTAP4-4  | 0.135359 | 2.08E-03 | 3.97E-03 |
| KRTAP4-5  | 0.090224 | 4.07E-02 | 6.11E-02 |
| KRTAP4-7  | 0.032624 | 4.60E-01 | 5.26E-01 |
| KRTAP4-8  | 0.006165 | 8.89E-01 | 9.10E-01 |
| KRTAP4-9  | 0.051178 | 2.46E-01 | 3.06E-01 |
| KRTAP5-10 | -0.28859 | 2.46E-11 | 1.24E-10 |
| KRTAP5-11 | -0.05846 | 1.85E-01 | 2.39E-01 |
| KRTAP5-1  | -0.16408 | 1.84E-04 | 4.13E-04 |
| KRTAP5-2  | -0.16212 | 2.20E-04 | 4.89E-04 |
| KRTAP5-3  | -0.01169 | 7.91E-01 | 8.27E-01 |
| KRTAP5-4  | -0.01908 | 6.66E-01 | 7.17E-01 |

|          |          |          |          |
|----------|----------|----------|----------|
| KRTAP5-5 | 0.090053 | 4.11E-02 | 6.17E-02 |
| KRTAP5-6 | 0.083785 | 5.74E-02 | 8.36E-02 |
| KRTAP5-7 | -0.15394 | 4.55E-04 | 9.62E-04 |
| KRTAP5-8 | -0.31706 | 1.72E-13 | 1.09E-12 |
| KRTAP5-9 | -0.33005 | 1.49E-14 | 1.04E-13 |
| KRTAP6-3 | 0.030915 | 4.84E-01 | 5.49E-01 |
| KRTAP7-1 | -0.00272 | 9.51E-01 | 9.61E-01 |
| KRTAP8-1 | -0.0315  | 4.76E-01 | 5.41E-01 |
| KRTAP9-2 | 0.113115 | 1.02E-02 | 1.73E-02 |
| KRTAP9-4 | 0.117176 | 7.77E-03 | 1.34E-02 |
| KRTAP9-9 | 0.107567 | 1.46E-02 | 2.41E-02 |
| KRTCAP2  | -0.02225 | 6.14E-01 | 6.71E-01 |
| KRTCAP3  | -0.0957  | 2.99E-02 | 4.61E-02 |
| KRTDAP   | 0.068995 | 1.18E-01 | 1.59E-01 |
| KSR1     | -0.14068 | 1.37E-03 | 2.70E-03 |
| KSR2     | -0.1917  | 1.18E-05 | 3.14E-05 |
| KTELC1   | 0.065371 | 1.38E-01 | 1.84E-01 |
| KTI12    | 0.141174 | 1.32E-03 | 2.60E-03 |
| KTN1     | 0.076101 | 8.45E-02 | 1.18E-01 |
| KYNU     | 0.224836 | 2.52E-07 | 8.24E-07 |
| KY       | -0.14276 | 1.16E-03 | 2.30E-03 |
| L1CAM    | 0.19366  | 9.59E-06 | 2.57E-05 |
| L1TD1    | -0.20027 | 4.64E-06 | 1.30E-05 |
| L2HGDH   | 0.291121 | 1.62E-11 | 8.33E-11 |
| L3MBTL2  | -0.19826 | 5.80E-06 | 1.60E-05 |
| L3MBTL3  | 0.226824 | 1.96E-07 | 6.49E-07 |
| L3MBTL4  | -0.1979  | 6.04E-06 | 1.67E-05 |
| L3MBTL   | -0.1919  | 1.16E-05 | 3.08E-05 |
| LACE1    | 0.069462 | 1.15E-01 | 1.56E-01 |
| LACRT    | -0.10065 | 2.23E-02 | 3.54E-02 |
| LACTB2   | 0.02164  | 6.24E-01 | 6.80E-01 |
| LACTB    | 0.100137 | 2.30E-02 | 3.65E-02 |
| LAD1     | -0.07775 | 7.80E-02 | 1.10E-01 |
| LAG3     | 0.211543 | 1.27E-06 | 3.80E-06 |
| LAGE3    | 0.267569 | 6.82E-10 | 2.97E-09 |
| LAIR1    | -0.0303  | 4.93E-01 | 5.57E-01 |
| LAIR2    | 0.064796 | 1.42E-01 | 1.88E-01 |
| LALBA    | 0.053811 | 2.23E-01 | 2.80E-01 |
| LAMA1    | 0.200818 | 4.37E-06 | 1.23E-05 |
| LAMA2    | -0.39023 | 3.53E-20 | 4.19E-19 |
| LAMA3    | -0.01897 | 6.68E-01 | 7.19E-01 |
| LAMA4    | -0.01698 | 7.01E-01 | 7.49E-01 |
| LAMA5    | -0.0199  | 6.52E-01 | 7.06E-01 |
| LAMB1    | 0.157216 | 3.42E-04 | 7.36E-04 |

|         |          |          |          |
|---------|----------|----------|----------|
| LAMB2L  | -0.30958 | 6.68E-13 | 4.00E-12 |
| LAMB2   | -0.40555 | 8.27E-22 | 1.12E-20 |
| LAMB3   | 0.088348 | 4.51E-02 | 6.71E-02 |
| LAMB4   | 0.00734  | 8.68E-01 | 8.92E-01 |
| LAMC1   | 0.136032 | 1.98E-03 | 3.79E-03 |
| LAMC2   | 0.243706 | 2.12E-08 | 7.78E-08 |
| LAMC3   | -0.17031 | 1.03E-04 | 2.39E-04 |
| LAMP1   | -0.18169 | 3.36E-05 | 8.35E-05 |
| LAMP2   | 0.027167 | 5.38E-01 | 6.01E-01 |
| LAMP3   | -0.28335 | 5.78E-11 | 2.80E-10 |
| LANCL1  | 0.079095 | 7.29E-02 | 1.04E-01 |
| LANCL2  | 0.098467 | 2.54E-02 | 3.99E-02 |
| LANCL3  | -0.34709 | 5.02E-16 | 4.06E-15 |
| LAP3    | 0.196235 | 7.25E-06 | 1.98E-05 |
| LAPTM4A | -0.14945 | 6.68E-04 | 1.38E-03 |
| LAPTM4B | 0.027682 | 5.31E-01 | 5.94E-01 |
| LAPTM5  | 0.012818 | 7.72E-01 | 8.10E-01 |
| LARGE   | -0.40502 | 9.44E-22 | 1.27E-20 |
| LARP1B  | 0.181855 | 3.30E-05 | 8.22E-05 |
| LARP1   | 0.18978  | 1.45E-05 | 3.80E-05 |
| LARP4B  | -0.19081 | 1.30E-05 | 3.43E-05 |
| LARP4   | 0.345687 | 6.69E-16 | 5.34E-15 |
| LARP6   | 0.241474 | 2.87E-08 | 1.04E-07 |
| LARP7   | 0.019344 | 6.61E-01 | 7.14E-01 |
| LARS2   | 0.169444 | 1.12E-04 | 2.58E-04 |
| LARS    | -0.08295 | 6.00E-02 | 8.71E-02 |
| LAS1L   | 0.20351  | 3.22E-06 | 9.20E-06 |
| LASP1   | 0.154636 | 4.28E-04 | 9.09E-04 |
| LASS1   | 0.172823 | 8.08E-05 | 1.91E-04 |
| LASS2   | -0.2499  | 8.99E-09 | 3.45E-08 |
| LASS3   | 0.073738 | 9.46E-02 | 1.31E-01 |
| LASS4   | -0.28556 | 4.04E-11 | 1.99E-10 |
| LASS5   | 0.099549 | 2.39E-02 | 3.76E-02 |
| LASS6   | 0.253179 | 5.65E-09 | 2.22E-08 |
| LAT2    | 0.010103 | 8.19E-01 | 8.51E-01 |
| LATS1   | 0.102215 | 2.03E-02 | 3.25E-02 |
| LATS2   | -0.13005 | 3.11E-03 | 5.78E-03 |
| LAT     | -0.05129 | 2.45E-01 | 3.05E-01 |
| LAX1    | -0.04291 | 3.31E-01 | 3.97E-01 |
| LAYN    | 0.02076  | 6.38E-01 | 6.93E-01 |
| LBH     | -0.28573 | 3.93E-11 | 1.94E-10 |
| LBP     | 0.213928 | 9.59E-07 | 2.91E-06 |
| LBR     | 0.380422 | 3.53E-19 | 3.81E-18 |
| LBX1    | 0.007827 | 8.59E-01 | 8.85E-01 |

|         |           |          |          |
|---------|-----------|----------|----------|
| LBX2    | 0.122793  | 5.26E-03 | 9.41E-03 |
| LBXCOR1 | -0.2955   | 7.76E-12 | 4.13E-11 |
| LCA5L   | -0.31691  | 1.77E-13 | 1.12E-12 |
| LCA5    | -0.30768  | 9.38E-13 | 5.52E-12 |
| LCAT    | -0.35915  | 4.00E-17 | 3.63E-16 |
| LCE1B   | -5.72E-05 | 9.99E-01 | 9.99E-01 |
| LCE1C   | 0.025674  | 5.61E-01 | 6.22E-01 |
| LCE1E   | 0.048212  | 2.75E-01 | 3.37E-01 |
| LCE1F   | 0.056808  | 1.98E-01 | 2.53E-01 |
| LCE2A   | -0.01003  | 8.20E-01 | 8.52E-01 |
| LCE2B   | 0.013043  | 7.68E-01 | 8.07E-01 |
| LCE2C   | 0.041416  | 3.48E-01 | 4.14E-01 |
| LCE2D   | 0.077699  | 7.81E-02 | 1.11E-01 |
| LCE3A   | 0.05458   | 2.16E-01 | 2.73E-01 |
| LCE3D   | 0.163175  | 2.00E-04 | 4.47E-04 |
| LCE3E   | 0.139746  | 1.48E-03 | 2.89E-03 |
| LCE5A   | 0.048848  | 2.69E-01 | 3.30E-01 |
| LCK     | 0.034273  | 4.38E-01 | 5.04E-01 |
| LCLAT1  | 0.397976  | 5.42E-21 | 6.91E-20 |
| LCMT1   | 0.014288  | 7.46E-01 | 7.89E-01 |
| LCMT2   | -0.14714  | 8.10E-04 | 1.65E-03 |
| LCN10   | -0.23578  | 6.15E-08 | 2.15E-07 |
| LCN12   | -0.23453  | 7.26E-08 | 2.51E-07 |
| LCN15   | 0.092931  | 3.50E-02 | 5.33E-02 |
| LCN1    | 0.169962  | 1.06E-04 | 2.47E-04 |
| LCN2    | -0.04968  | 2.60E-01 | 3.22E-01 |
| LCN6    | -0.37495  | 1.23E-18 | 1.27E-17 |
| LCN8    | 0.032665  | 4.59E-01 | 5.26E-01 |
| LCN9    | -0.07407  | 9.31E-02 | 1.29E-01 |
| LCNL1   | -0.22902  | 1.48E-07 | 4.98E-07 |
| LCORL   | 0.113458  | 9.97E-03 | 1.69E-02 |
| LCOR    | 0.076983  | 8.09E-02 | 1.14E-01 |
| LCP1    | -0.00244  | 9.56E-01 | 9.65E-01 |
| LCP2    | 0.007763  | 8.60E-01 | 8.86E-01 |
| LCTL    | 0.30475   | 1.57E-12 | 9.08E-12 |
| LCT     | -0.07188  | 1.03E-01 | 1.42E-01 |
| LDB1    | -0.45299  | 2.01E-27 | 4.31E-26 |
| LDB2    | -0.36744  | 6.60E-18 | 6.35E-17 |
| LDB3    | -0.35293  | 1.49E-16 | 1.27E-15 |
| LDHAL6A | -0.05086  | 2.49E-01 | 3.10E-01 |
| LDHAL6B | 0.071042  | 1.07E-01 | 1.47E-01 |
| LDHA    | 0.469834  | 1.22E-29 | 3.08E-28 |
| LDHB    | 0.266245  | 8.33E-10 | 3.59E-09 |
| LDHC    | 0.11617   | 8.32E-03 | 1.43E-02 |

|          |          |          |          |
|----------|----------|----------|----------|
| LDHD     | -0.47293 | 4.65E-30 | 1.20E-28 |
| LDLRAD1  | -0.08116 | 6.57E-02 | 9.47E-02 |
| LDLRAD2  | -0.40399 | 1.22E-21 | 1.64E-20 |
| LDLRAD3  | 0.251079 | 7.61E-09 | 2.94E-08 |
| LDLRAP1  | -0.37612 | 9.44E-19 | 9.80E-18 |
| LDLR     | -0.06988 | 1.13E-01 | 1.54E-01 |
| LDOC1L   | -0.0985  | 2.54E-02 | 3.98E-02 |
| LDOC1    | -0.09134 | 3.82E-02 | 5.78E-02 |
| LEAP2    | -0.15488 | 4.19E-04 | 8.90E-04 |
| LECT1    | -0.21993 | 4.64E-07 | 1.47E-06 |
| LECT2    | 0.098738 | 2.50E-02 | 3.93E-02 |
| LEF1     | -0.02575 | 5.60E-01 | 6.21E-01 |
| LEFTY1   | -0.05093 | 2.49E-01 | 3.09E-01 |
| LEFTY2   | -0.46159 | 1.54E-28 | 3.56E-27 |
| LEKR1    | -0.0873  | 4.77E-02 | 7.06E-02 |
| LELP1    | -0.05838 | 1.86E-01 | 2.39E-01 |
| LEMD1    | -0.17445 | 6.90E-05 | 1.65E-04 |
| LEMD2    | 0.049758 | 2.60E-01 | 3.21E-01 |
| LEMD3    | 0.14471  | 9.90E-04 | 1.99E-03 |
| LENEP    | -0.02151 | 6.26E-01 | 6.82E-01 |
| LENG1    | -0.14191 | 1.24E-03 | 2.46E-03 |
| LENG8    | -0.26722 | 7.19E-10 | 3.13E-09 |
| LENG9    | -0.11868 | 7.01E-03 | 1.22E-02 |
| LEO1     | 0.332063 | 1.01E-14 | 7.17E-14 |
| LEPRE1   | 0.235572 | 6.33E-08 | 2.20E-07 |
| LEPREL1  | -0.33379 | 7.21E-15 | 5.19E-14 |
| LEPREL2  | 0.000584 | 9.89E-01 | 9.92E-01 |
| LEPROTL1 | -0.05132 | 2.45E-01 | 3.05E-01 |
| LEPROT   | 0.040842 | 3.55E-01 | 4.21E-01 |
| LEPR     | -0.14737 | 7.95E-04 | 1.62E-03 |
| LEP      | 0.146349 | 8.65E-04 | 1.75E-03 |
| LETM1    | 0.218857 | 5.29E-07 | 1.66E-06 |
| LETM2    | 0.132594 | 2.57E-03 | 4.83E-03 |
| LETMD1   | -0.24918 | 9.94E-09 | 3.79E-08 |
| LEUTX    | 0.077993 | 7.70E-02 | 1.09E-01 |
| LFNG     | -0.09869 | 2.51E-02 | 3.94E-02 |
| LGALS12  | -0.05976 | 1.76E-01 | 2.28E-01 |
| LGALS13  | 0.103157 | 1.92E-02 | 3.09E-02 |
| LGALS14  | 0.129299 | 3.29E-03 | 6.08E-03 |
| LGALS1   | 0.213537 | 1.00E-06 | 3.04E-06 |
| LGALS2   | -0.18065 | 3.73E-05 | 9.23E-05 |
| LGALS3BP | -0.20962 | 1.60E-06 | 4.72E-06 |
| LGALS3   | -0.10019 | 2.30E-02 | 3.64E-02 |
| LGALS4   | -0.20687 | 2.20E-06 | 6.38E-06 |



|         |          |          |          |
|---------|----------|----------|----------|
| LGALS7B | 0.096896 | 2.79E-02 | 4.33E-02 |
| LGALS7  | 0.065894 | 1.35E-01 | 1.81E-01 |
| LGALS8  | -0.0745  | 9.12E-02 | 1.27E-01 |
| LGALS9B | -0.11089 | 1.18E-02 | 1.98E-02 |
| LGALS9C | -0.19184 | 1.17E-05 | 3.09E-05 |
| LGALS9  | -0.12999 | 3.12E-03 | 5.80E-03 |
| LGI1    | -0.05764 | 1.92E-01 | 2.45E-01 |
| LGI2    | 0.149439 | 6.68E-04 | 1.38E-03 |
| LGI3    | -0.34086 | 1.78E-15 | 1.35E-14 |
| LGI4    | -0.26249 | 1.46E-09 | 6.12E-09 |
| LGMN    | -0.15124 | 5.74E-04 | 1.20E-03 |
| LGR4    | 0.061464 | 1.64E-01 | 2.14E-01 |
| LGR5    | -0.09389 | 3.32E-02 | 5.08E-02 |
| LGR6    | -0.38663 | 8.29E-20 | 9.49E-19 |
| LGSN    | -0.04811 | 2.76E-01 | 3.38E-01 |
| LGTN    | -0.23065 | 1.20E-07 | 4.07E-07 |
| LHB     | 0.008313 | 8.51E-01 | 8.78E-01 |
| LHCGR   | -0.27309 | 2.93E-10 | 1.34E-09 |
| LHFPL1  | 0.043607 | 3.23E-01 | 3.88E-01 |
| LHFPL2  | 0.19977  | 4.91E-06 | 1.37E-05 |
| LHFPL3  | -0.36311 | 1.70E-17 | 1.59E-16 |
| LHFPL4  | -0.0315  | 4.76E-01 | 5.41E-01 |
| LHFPL5  | 0.285945 | 3.79E-11 | 1.87E-10 |
| LHFP    | -0.35869 | 4.41E-17 | 3.99E-16 |
| LHPP    | -0.2501  | 8.73E-09 | 3.35E-08 |
| LHX1    | 0.299252 | 4.09E-12 | 2.25E-11 |
| LHX2    | 0.351864 | 1.87E-16 | 1.57E-15 |
| LHX3    | 0.05008  | 2.57E-01 | 3.18E-01 |
| LHX4    | -0.10401 | 1.82E-02 | 2.94E-02 |
| LHX5    | 0.255831 | 3.86E-09 | 1.54E-08 |
| LHX6    | -0.10417 | 1.80E-02 | 2.92E-02 |
| LHX8    | 0.175415 | 6.28E-05 | 1.51E-04 |
| LHX9    | -0.1094  | 1.30E-02 | 2.16E-02 |
| LIAS    | -0.0505  | 2.53E-01 | 3.13E-01 |
| LIFR    | -0.26823 | 6.17E-10 | 2.70E-09 |
| LIF     | 0.026881 | 5.43E-01 | 6.05E-01 |
| LIG1    | 0.420889 | 1.58E-23 | 2.48E-22 |
| LIG3    | 0.354703 | 1.03E-16 | 8.89E-16 |
| LIG4    | -0.14565 | 9.17E-04 | 1.85E-03 |
| LILRA1  | -0.06414 | 1.46E-01 | 1.93E-01 |
| LILRA2  | -0.17457 | 6.82E-05 | 1.63E-04 |
| LILRA3  | 0.29571  | 7.48E-12 | 3.99E-11 |
| LILRA4  | -0.1438  | 1.07E-03 | 2.13E-03 |
| LILRA5  | 0.201639 | 3.98E-06 | 1.12E-05 |

|                 |          |          |          |
|-----------------|----------|----------|----------|
| LILRA6          | 0.049367 | 2.63E-01 | 3.25E-01 |
| LILRB1          | 0.048603 | 2.71E-01 | 3.33E-01 |
| LILRB2          | 0.169195 | 1.14E-04 | 2.64E-04 |
| LILRB3          | 0.051335 | 2.45E-01 | 3.05E-01 |
| LILRB4          | 0.161099 | 2.42E-04 | 5.33E-04 |
| LILRB5          | -0.09993 | 2.33E-02 | 3.69E-02 |
| LILRP2          | 0.155256 | 4.06E-04 | 8.64E-04 |
| LIM2            | 0.030975 | 4.83E-01 | 5.48E-01 |
| LIMA1           | -0.05305 | 2.29E-01 | 2.88E-01 |
| LIMCH1          | -0.36839 | 5.34E-18 | 5.18E-17 |
| LIMD1           | -0.51037 | 1.67E-35 | 5.93E-34 |
| LIMD2           | 0.10558  | 1.65E-02 | 2.69E-02 |
| LIME1           | -0.10671 | 1.54E-02 | 2.53E-02 |
| LIMK1           | 0.203517 | 3.22E-06 | 9.20E-06 |
| LIMK2           | 0.003143 | 9.43E-01 | 9.56E-01 |
| LIMS1           | 0.224597 | 2.60E-07 | 8.49E-07 |
| LIMS2           | -0.41965 | 2.19E-23 | 3.41E-22 |
| LIMS3-LOC440895 | 0.063635 | 1.49E-01 | 1.97E-01 |
| LIMS3           | 0.085551 | 5.23E-02 | 7.69E-02 |
| LIN28A          | 0.234815 | 6.99E-08 | 2.42E-07 |
| LIN28B          | 0.340415 | 1.94E-15 | 1.47E-14 |
| LIN37           | 0.165445 | 1.62E-04 | 3.67E-04 |
| LIN52           | 0.169551 | 1.10E-04 | 2.56E-04 |
| LIN54           | 0.473556 | 3.81E-30 | 9.87E-29 |
| LIN7A           | 0.070164 | 1.12E-01 | 1.52E-01 |
| LIN7B           | -0.05569 | 2.07E-01 | 2.63E-01 |
| LIN7C           | 0.087508 | 4.72E-02 | 6.99E-02 |
| LIN9            | 0.528814 | 1.91E-38 | 8.02E-37 |
| LINGO1          | 0.013815 | 7.54E-01 | 7.96E-01 |
| LINGO2          | 0.230227 | 1.27E-07 | 4.29E-07 |
| LINGO3          | -0.05413 | 2.20E-01 | 2.77E-01 |
| LINGO4          | -0.21939 | 4.95E-07 | 1.56E-06 |
| LINS1           | -0.08539 | 5.28E-02 | 7.75E-02 |
| LIPA            | -0.15335 | 4.79E-04 | 1.01E-03 |
| LIPC            | 0.027033 | 5.40E-01 | 6.03E-01 |
| LIPE            | -0.11062 | 1.20E-02 | 2.01E-02 |
| LIPF            | -0.17855 | 4.60E-05 | 1.13E-04 |
| LIPG            | 0.178431 | 4.66E-05 | 1.14E-04 |
| LIPH            | -0.1307  | 2.96E-03 | 5.52E-03 |
| LIPI            | 0.084176 | 5.63E-02 | 8.21E-02 |
| LIPJ            | -0.13103 | 2.89E-03 | 5.39E-03 |
| LIPK            | 0.294346 | 9.42E-12 | 4.98E-11 |
| LIPM            | -0.03742 | 3.97E-01 | 4.63E-01 |
| LIPN            | -0.08474 | 5.46E-02 | 7.99E-02 |

|              |          |          |          |
|--------------|----------|----------|----------|
| LIPT1        | -0.10829 | 1.39E-02 | 2.31E-02 |
| LIPT2        | 0.085709 | 5.19E-02 | 7.63E-02 |
| LITAF        | -0.15874 | 2.98E-04 | 6.49E-04 |
| LIX1L        | -0.1219  | 5.61E-03 | 9.98E-03 |
| LIX1         | 0.025022 | 5.71E-01 | 6.31E-01 |
| LLGL1        | 0.168612 | 1.21E-04 | 2.78E-04 |
| LLGL2        | -0.20342 | 3.26E-06 | 9.29E-06 |
| LLPH         | 0.402825 | 1.64E-21 | 2.16E-20 |
| LMAN1L       | -0.0627  | 1.55E-01 | 2.04E-01 |
| LMAN1        | 0.269993 | 4.72E-10 | 2.10E-09 |
| LMAN2L       | 0.088932 | 4.37E-02 | 6.52E-02 |
| LMAN2        | -0.11793 | 7.38E-03 | 1.28E-02 |
| LMBR1L       | -0.01649 | 7.09E-01 | 7.56E-01 |
| LMBR1        | 0.321016 | 8.28E-14 | 5.41E-13 |
| LMBRD1       | -0.33214 | 9.95E-15 | 7.07E-14 |
| LMBRD2       | 0.110554 | 1.21E-02 | 2.02E-02 |
| LMCD1        | -0.2066  | 2.26E-06 | 6.57E-06 |
| LMF1         | -0.52731 | 3.38E-38 | 1.39E-36 |
| LMF2         | -0.14228 | 1.21E-03 | 2.39E-03 |
| LMLN         | -0.03773 | 3.93E-01 | 4.60E-01 |
| LMNA         | -0.16262 | 2.10E-04 | 4.69E-04 |
| LMNB1        | 0.743298 | 1.27E-91 | 1.82E-89 |
| LMNB2        | 0.608008 | 2.24E-53 | 1.65E-51 |
| LMO1         | 0.192884 | 1.04E-05 | 2.78E-05 |
| LMO2         | -0.2873  | 3.04E-11 | 1.52E-10 |
| LMO3         | -0.40439 | 1.11E-21 | 1.48E-20 |
| LMO4         | -0.10934 | 1.30E-02 | 2.17E-02 |
| LMO7         | -0.25316 | 5.67E-09 | 2.23E-08 |
| LMOD1        | -0.41336 | 1.13E-22 | 1.64E-21 |
| LMOD2        | 0.037758 | 3.93E-01 | 4.59E-01 |
| LMOD3        | -0.32646 | 2.97E-14 | 2.02E-13 |
| LMTK2        | 0.071063 | 1.07E-01 | 1.47E-01 |
| LMTK3        | -0.16037 | 2.58E-04 | 5.66E-04 |
| LMX1A        | 0.088539 | 4.46E-02 | 6.65E-02 |
| LMX1B        | -0.0597  | 1.76E-01 | 2.28E-01 |
| LNP1         | -0.05625 | 2.03E-01 | 2.58E-01 |
| LNPEP        | 0.147364 | 7.95E-04 | 1.62E-03 |
| LNX1         | -0.15141 | 5.66E-04 | 1.18E-03 |
| LNX2         | -0.45072 | 3.92E-27 | 8.17E-26 |
| LOC100009676 | -0.1555  | 3.97E-04 | 8.47E-04 |
| LOC100101266 | -0.25965 | 2.22E-09 | 9.11E-09 |
| LOC100101938 | 0.096163 | 2.91E-02 | 4.50E-02 |
| LOC100124692 | -0.00179 | 9.68E-01 | 9.75E-01 |
| LOC100125556 | 0.078189 | 7.63E-02 | 1.08E-01 |

|              |          |          |          |
|--------------|----------|----------|----------|
| LOC100126784 | 0.141986 | 1.23E-03 | 2.45E-03 |
| LOC100127888 | 0.141258 | 1.31E-03 | 2.58E-03 |
| LOC100128023 | -0.01157 | 7.93E-01 | 8.29E-01 |
| LOC100128076 | 0.135315 | 2.09E-03 | 3.98E-03 |
| LOC100128164 | -0.12284 | 5.25E-03 | 9.38E-03 |
| LOC100128191 | 0.644888 | 6.98E-62 | 6.37E-60 |
| LOC100128239 | -0.23993 | 3.54E-08 | 1.27E-07 |
| LOC100128288 | -0.26424 | 1.13E-09 | 4.79E-09 |
| LOC100128292 | -0.08517 | 5.34E-02 | 7.83E-02 |
| LOC100128542 | -0.07797 | 7.71E-02 | 1.09E-01 |
| LOC100128554 | -0.09285 | 3.52E-02 | 5.35E-02 |
| LOC100128573 | -0.13688 | 1.85E-03 | 3.56E-03 |
| LOC100128640 | -0.12706 | 3.88E-03 | 7.08E-03 |
| LOC100128675 | -0.25389 | 5.10E-09 | 2.01E-08 |
| LOC100128788 | -0.01822 | 6.80E-01 | 7.30E-01 |
| LOC100128811 | -0.03845 | 3.84E-01 | 4.50E-01 |
| LOC100128822 | 0.003039 | 9.45E-01 | 9.57E-01 |
| LOC100128842 | -0.18167 | 3.36E-05 | 8.36E-05 |
| LOC100128977 | 0.055228 | 2.11E-01 | 2.67E-01 |
| LOC100129034 | -0.43821 | 1.41E-25 | 2.61E-24 |
| LOC100129055 | -0.05901 | 1.81E-01 | 2.34E-01 |
| LOC100129066 | -0.04481 | 3.10E-01 | 3.74E-01 |
| LOC100129387 | -0.23759 | 4.84E-08 | 1.71E-07 |
| LOC100129534 | -0.29217 | 1.36E-11 | 7.05E-11 |
| LOC100129550 | -0.29929 | 4.06E-12 | 2.24E-11 |
| LOC100129637 | -0.11343 | 9.99E-03 | 1.69E-02 |
| LOC100129716 | -0.1203  | 6.27E-03 | 1.11E-02 |
| LOC100129726 | -0.05118 | 2.46E-01 | 3.06E-01 |
| LOC100129935 | 0.097907 | 2.63E-02 | 4.11E-02 |
| LOC100130015 | -0.2592  | 2.37E-09 | 9.70E-09 |
| LOC100130093 | -0.38711 | 7.40E-20 | 8.51E-19 |
| LOC100130148 | 0.127696 | 3.70E-03 | 6.78E-03 |
| LOC100130238 | 0.089014 | 4.35E-02 | 6.49E-02 |
| LOC100130264 | 0.001228 | 9.78E-01 | 9.83E-01 |
| LOC100130274 | 0.06574  | 1.36E-01 | 1.82E-01 |
| LOC100130331 | 0.135493 | 2.06E-03 | 3.94E-03 |
| LOC100130386 | 0.073943 | 9.37E-02 | 1.30E-01 |
| LOC100130522 | -0.17093 | 9.68E-05 | 2.26E-04 |
| LOC100130557 | -0.242   | 2.68E-08 | 9.71E-08 |
| LOC100130581 | -0.16709 | 1.39E-04 | 3.18E-04 |
| LOC100130691 | -0.00043 | 9.92E-01 | 9.94E-01 |
| LOC100130776 | 0.049029 | 2.67E-01 | 3.28E-01 |
| LOC100130872 | -0.04297 | 3.30E-01 | 3.96E-01 |
| LOC100130932 | 0.257334 | 3.11E-09 | 1.26E-08 |

|              |          |          |          |
|--------------|----------|----------|----------|
| LOC100130933 | -0.30462 | 1.61E-12 | 9.27E-12 |
| LOC100130987 | -0.19372 | 9.53E-06 | 2.56E-05 |
| LOC100131193 | -0.12642 | 4.06E-03 | 7.40E-03 |
| LOC100131434 | -0.30238 | 2.38E-12 | 1.35E-11 |
| LOC100131496 | 0.026349 | 5.51E-01 | 6.12E-01 |
| LOC100131551 | 0.367024 | 7.23E-18 | 6.94E-17 |
| LOC100131691 | -0.2171  | 6.55E-07 | 2.03E-06 |
| LOC100131726 | 0.260902 | 1.85E-09 | 7.65E-09 |
| LOC100132111 | 0.024403 | 5.81E-01 | 6.40E-01 |
| LOC100132215 | -0.04303 | 3.30E-01 | 3.95E-01 |
| LOC100132247 | -0.20778 | 1.98E-06 | 5.78E-06 |
| LOC100132287 | -0.13924 | 1.54E-03 | 3.00E-03 |
| LOC100132288 | -0.1163  | 8.25E-03 | 1.42E-02 |
| LOC100132354 | 0.343975 | 9.47E-16 | 7.43E-15 |
| LOC100132707 | -0.3539  | 1.22E-16 | 1.05E-15 |
| LOC100132724 | 0.114809 | 9.11E-03 | 1.56E-02 |
| LOC100132831 | 0.12276  | 5.28E-03 | 9.43E-03 |
| LOC100132832 | -0.19014 | 1.40E-05 | 3.66E-05 |
| LOC100133050 | -0.05358 | 2.25E-01 | 2.83E-01 |
| LOC100133161 | -0.13159 | 2.77E-03 | 5.18E-03 |
| LOC100133308 | 0.042812 | 3.32E-01 | 3.98E-01 |
| LOC100133331 | -0.18362 | 2.76E-05 | 6.95E-05 |
| LOC100133469 | 0.170815 | 9.79E-05 | 2.29E-04 |
| LOC100133545 | 0.026017 | 5.56E-01 | 6.17E-01 |
| LOC100133612 | -0.01691 | 7.02E-01 | 7.50E-01 |
| LOC100133669 | -0.07217 | 1.02E-01 | 1.40E-01 |
| LOC100133893 | -0.01079 | 8.07E-01 | 8.40E-01 |
| LOC100133920 | 0.105475 | 1.66E-02 | 2.71E-02 |
| LOC100133957 | 0.096006 | 2.94E-02 | 4.54E-02 |
| LOC100133985 | 0.2535   | 5.40E-09 | 2.13E-08 |
| LOC100133991 | 0.050073 | 2.57E-01 | 3.18E-01 |
| LOC100134229 | 0.095629 | 3.00E-02 | 4.63E-02 |
| LOC100134259 | -0.03359 | 4.47E-01 | 5.13E-01 |
| LOC100134368 | -0.17072 | 9.88E-05 | 2.31E-04 |
| LOC100134713 | -0.00433 | 9.22E-01 | 9.38E-01 |
| LOC100134868 | -0.16058 | 2.53E-04 | 5.56E-04 |
| LOC100144603 | 0.196808 | 6.81E-06 | 1.86E-05 |
| LOC100144604 | -0.25035 | 8.44E-09 | 3.25E-08 |
| LOC100170939 | -0.13858 | 1.62E-03 | 3.14E-03 |
| LOC100188947 | -0.03382 | 4.44E-01 | 5.10E-01 |
| LOC100188949 | -0.17768 | 5.02E-05 | 1.22E-04 |
| LOC100189589 | -0.1787  | 4.53E-05 | 1.11E-04 |
| LOC100190938 | -0.01594 | 7.18E-01 | 7.65E-01 |
| LOC100190939 | -0.12612 | 4.15E-03 | 7.55E-03 |

|              |          |          |          |
|--------------|----------|----------|----------|
| LOC100190940 | 0.075979 | 8.50E-02 | 1.19E-01 |
| LOC100190986 | -0.23737 | 4.98E-08 | 1.75E-07 |
| LOC100192378 | 0.078332 | 7.57E-02 | 1.08E-01 |
| LOC100192379 | 0.019849 | 6.53E-01 | 7.07E-01 |
| LOC100192426 | 0.04973  | 2.60E-01 | 3.21E-01 |
| LOC100216001 | 0.279784 | 1.02E-10 | 4.86E-10 |
| LOC100216545 | 0.038206 | 3.87E-01 | 4.53E-01 |
| LOC100233209 | -0.03958 | 3.70E-01 | 4.36E-01 |
| LOC100240726 | -0.18668 | 2.01E-05 | 5.17E-05 |
| LOC100240734 | 0.097171 | 2.75E-02 | 4.27E-02 |
| LOC100240735 | 0.040966 | 3.54E-01 | 4.19E-01 |
| LOC100268168 | -0.03199 | 4.69E-01 | 5.35E-01 |
| LOC100270710 | 0.059773 | 1.76E-01 | 2.28E-01 |
| LOC100270746 | -0.10842 | 1.38E-02 | 2.29E-02 |
| LOC100270804 | -0.25039 | 8.39E-09 | 3.23E-08 |
| LOC100271722 | -0.29286 | 1.21E-11 | 6.32E-11 |
| LOC100271831 | -0.01914 | 6.65E-01 | 7.17E-01 |
| LOC100271832 | 0.045985 | 2.98E-01 | 3.61E-01 |
| LOC100271836 | -0.03119 | 4.80E-01 | 5.45E-01 |
| LOC100272146 | -0.04498 | 3.08E-01 | 3.72E-01 |
| LOC100272216 | -0.11949 | 6.63E-03 | 1.16E-02 |
| LOC100272217 | -0.06401 | 1.47E-01 | 1.94E-01 |
| LOC100272228 | -0.21337 | 1.03E-06 | 3.10E-06 |
| LOC100286793 | 0.13518  | 2.11E-03 | 4.02E-03 |
| LOC100286844 | -0.09117 | 3.86E-02 | 5.83E-02 |
| LOC100287227 | 0.081644 | 6.41E-02 | 9.26E-02 |
| LOC100287704 | -0.00143 | 9.74E-01 | 9.80E-01 |
| LOC100287718 | -0.27558 | 1.99E-10 | 9.20E-10 |
| LOC100288778 | -0.1797  | 4.10E-05 | 1.01E-04 |
| LOC100289341 | -0.08652 | 4.97E-02 | 7.34E-02 |
| LOC100302401 | 0.290011 | 1.94E-11 | 9.94E-11 |
| LOC100302640 | -0.04963 | 2.61E-01 | 3.22E-01 |
| LOC100302650 | -0.19967 | 4.97E-06 | 1.39E-05 |
| LOC100303728 | -0.2279  | 1.71E-07 | 5.69E-07 |
| LOC113230    | -0.28626 | 3.60E-11 | 1.79E-10 |
| LOC115110    | -0.34617 | 6.05E-16 | 4.86E-15 |
| LOC116437    | 0.080552 | 6.78E-02 | 9.74E-02 |
| LOC121838    | -0.13539 | 2.07E-03 | 3.96E-03 |
| LOC121952    | -0.30587 | 1.29E-12 | 7.50E-12 |
| LOC126536    | 0.013463 | 7.61E-01 | 8.01E-01 |
| LOC127841    | 0.36035  | 3.09E-17 | 2.83E-16 |
| LOC134466    | -0.19791 | 6.03E-06 | 1.66E-05 |
| LOC143188    | -0.13997 | 1.45E-03 | 2.84E-03 |
| LOC143666    | -0.14321 | 1.12E-03 | 2.23E-03 |

|           |          |          |          |
|-----------|----------|----------|----------|
| LOC144438 | 0.268956 | 5.52E-10 | 2.44E-09 |
| LOC144486 | 0.257276 | 3.14E-09 | 1.27E-08 |
| LOC144571 | -0.29969 | 3.79E-12 | 2.10E-11 |
| LOC144742 | -0.02284 | 6.05E-01 | 6.62E-01 |
| LOC144776 | 0.064353 | 1.45E-01 | 1.91E-01 |
| LOC145474 | -0.08272 | 6.07E-02 | 8.80E-02 |
| LOC145783 | 0.241817 | 2.74E-08 | 9.95E-08 |
| LOC145820 | -0.29899 | 4.27E-12 | 2.35E-11 |
| LOC145837 | -0.24285 | 2.39E-08 | 8.70E-08 |
| LOC145845 | -0.01958 | 6.58E-01 | 7.10E-01 |
| LOC146336 | -0.05353 | 2.25E-01 | 2.83E-01 |
| LOC146481 | 0.026489 | 5.49E-01 | 6.11E-01 |
| LOC146880 | -0.26197 | 1.58E-09 | 6.59E-09 |
| LOC147727 | -0.22954 | 1.39E-07 | 4.67E-07 |
| LOC147804 | 0.251531 | 7.14E-09 | 2.77E-08 |
| LOC148145 | -0.2727  | 3.11E-10 | 1.41E-09 |
| LOC148189 | -0.02076 | 6.38E-01 | 6.93E-01 |
| LOC148413 | -0.15028 | 6.23E-04 | 1.29E-03 |
| LOC148696 | -0.37769 | 6.60E-19 | 6.93E-18 |
| LOC148709 | 0.254705 | 4.54E-09 | 1.80E-08 |
| LOC148824 | 0.050299 | 2.55E-01 | 3.15E-01 |
| LOC149134 | -0.01412 | 7.49E-01 | 7.91E-01 |
| LOC149620 | -0.45474 | 1.20E-27 | 2.60E-26 |
| LOC149837 | -0.06019 | 1.73E-01 | 2.24E-01 |
| LOC150185 | 0.053104 | 2.29E-01 | 2.87E-01 |
| LOC150197 | -0.19034 | 1.37E-05 | 3.59E-05 |
| LOC150381 | -0.06823 | 1.22E-01 | 1.65E-01 |
| LOC150527 | -0.0593  | 1.79E-01 | 2.31E-01 |
| LOC150568 | 0.077135 | 8.03E-02 | 1.13E-01 |
| LOC150622 | -0.31391 | 3.06E-13 | 1.90E-12 |
| LOC150776 | -0.07811 | 7.66E-02 | 1.09E-01 |
| LOC150786 | 0.241846 | 2.73E-08 | 9.91E-08 |
| LOC151009 | -0.34325 | 1.10E-15 | 8.54E-15 |
| LOC151162 | -0.02429 | 5.82E-01 | 6.41E-01 |
| LOC151174 | -0.01064 | 8.10E-01 | 8.42E-01 |
| LOC151534 | 0.010488 | 8.12E-01 | 8.45E-01 |
| LOC151658 | 0.128486 | 3.49E-03 | 6.43E-03 |
| LOC152024 | -0.07122 | 1.06E-01 | 1.46E-01 |
| LOC152217 | 0.269035 | 5.46E-10 | 2.41E-09 |
| LOC152225 | 0.338987 | 2.58E-15 | 1.94E-14 |
| LOC153328 | 0.024027 | 5.86E-01 | 6.45E-01 |
| LOC153684 | -0.35027 | 2.60E-16 | 2.16E-15 |
| LOC153910 | 0.25005  | 8.80E-09 | 3.38E-08 |
| LOC154449 | 0.06796  | 1.23E-01 | 1.66E-01 |

|           |          |          |          |
|-----------|----------|----------|----------|
| LOC154761 | 0.130664 | 2.97E-03 | 5.53E-03 |
| LOC154822 | -0.22836 | 1.61E-07 | 5.38E-07 |
| LOC157381 | -0.22792 | 1.71E-07 | 5.68E-07 |
| LOC157627 | 0.030184 | 4.94E-01 | 5.59E-01 |
| LOC158376 | -0.21711 | 6.54E-07 | 2.03E-06 |
| LOC158572 | -0.2135  | 1.01E-06 | 3.05E-06 |
| LOC158696 | -0.24863 | 1.07E-08 | 4.07E-08 |
| LOC162632 | -0.10506 | 1.71E-02 | 2.77E-02 |
| LOC168474 | -0.17262 | 8.23E-05 | 1.94E-04 |
| LOC200030 | -0.27366 | 2.68E-10 | 1.23E-09 |
| LOC200726 | 0.106014 | 1.61E-02 | 2.63E-02 |
| LOC201651 | -0.02597 | 5.57E-01 | 6.18E-01 |
| LOC202181 | -0.30179 | 2.64E-12 | 1.48E-11 |
| LOC202781 | -0.09358 | 3.37E-02 | 5.16E-02 |
| LOC219347 | -0.07246 | 1.00E-01 | 1.38E-01 |
| LOC220429 | 0.074484 | 9.13E-02 | 1.27E-01 |
| LOC220594 | -0.12108 | 5.94E-03 | 1.05E-02 |
| LOC220729 | 0.185227 | 2.34E-05 | 5.96E-05 |
| LOC220930 | 0.206281 | 2.35E-06 | 6.80E-06 |
| LOC221122 | -0.13395 | 2.32E-03 | 4.39E-03 |
| LOC221442 | -0.101   | 2.19E-02 | 3.48E-02 |
| LOC221710 | 0.451395 | 3.21E-27 | 6.77E-26 |
| LOC222699 | 0.30845  | 8.18E-13 | 4.85E-12 |
| LOC253039 | -0.30279 | 2.22E-12 | 1.26E-11 |
| LOC253724 | -0.06493 | 1.41E-01 | 1.87E-01 |
| LOC254312 | -0.05813 | 1.88E-01 | 2.41E-01 |
| LOC254559 | 0.124807 | 4.56E-03 | 8.24E-03 |
| LOC255025 | 0.028938 | 5.12E-01 | 5.76E-01 |
| LOC255167 | -0.10492 | 1.72E-02 | 2.80E-02 |
| LOC256880 | -0.02592 | 5.57E-01 | 6.19E-01 |
| LOC257358 | -0.06591 | 1.35E-01 | 1.80E-01 |
| LOC25845  | -0.01427 | 7.47E-01 | 7.89E-01 |
| LOC26102  | -0.10053 | 2.25E-02 | 3.57E-02 |
| LOC282997 | -0.12512 | 4.46E-03 | 8.07E-03 |
| LOC283050 | -0.20263 | 3.56E-06 | 1.01E-05 |
| LOC283070 | -0.36786 | 6.01E-18 | 5.80E-17 |
| LOC283174 | -0.49071 | 1.46E-32 | 4.39E-31 |
| LOC283267 | -0.08322 | 5.91E-02 | 8.59E-02 |
| LOC283314 | -0.15106 | 5.83E-04 | 1.21E-03 |
| LOC283332 | 0.007605 | 8.63E-01 | 8.88E-01 |
| LOC283392 | -0.06794 | 1.24E-01 | 1.66E-01 |
| LOC283404 | 0.177308 | 5.21E-05 | 1.26E-04 |
| LOC283663 | -0.23324 | 8.60E-08 | 2.95E-07 |
| LOC283731 | -0.24123 | 2.97E-08 | 1.07E-07 |



|           |          |          |          |
|-----------|----------|----------|----------|
| LOC283761 | 0.125147 | 4.45E-03 | 8.06E-03 |
| LOC283856 | -0.18679 | 1.99E-05 | 5.12E-05 |
| LOC283867 | -0.11063 | 1.20E-02 | 2.01E-02 |
| LOC283914 | -0.10991 | 1.26E-02 | 2.10E-02 |
| LOC283922 | -0.268   | 6.39E-10 | 2.80E-09 |
| LOC283999 | 0.084692 | 5.48E-02 | 8.01E-02 |
| LOC284009 | -0.11867 | 7.02E-03 | 1.22E-02 |
| LOC284023 | -0.32127 | 7.90E-14 | 5.17E-13 |
| LOC284100 | 0.063045 | 1.53E-01 | 2.01E-01 |
| LOC284232 | 0.069314 | 1.16E-01 | 1.57E-01 |
| LOC284233 | -0.23375 | 8.04E-08 | 2.77E-07 |
| LOC284276 | -0.3279  | 2.25E-14 | 1.55E-13 |
| LOC284379 | 0.043747 | 3.22E-01 | 3.87E-01 |
| LOC284440 | -0.45958 | 2.82E-28 | 6.41E-27 |
| LOC284441 | 0.252618 | 6.12E-09 | 2.40E-08 |
| LOC284551 | 0.070071 | 1.12E-01 | 1.53E-01 |
| LOC284578 | -0.23932 | 3.84E-08 | 1.37E-07 |
| LOC284632 | -0.06196 | 1.60E-01 | 2.10E-01 |
| LOC284661 | 0.013183 | 7.65E-01 | 8.05E-01 |
| LOC284688 | 0.097738 | 2.66E-02 | 4.14E-02 |
| LOC284749 | -0.1677  | 1.32E-04 | 3.01E-04 |
| LOC284788 | -0.06491 | 1.41E-01 | 1.87E-01 |
| LOC284798 | 0.017894 | 6.85E-01 | 7.35E-01 |
| LOC284837 | -0.32859 | 1.97E-14 | 1.36E-13 |
| LOC284900 | -0.32408 | 4.66E-14 | 3.12E-13 |
| LOC285033 | 0.075611 | 8.65E-02 | 1.21E-01 |
| LOC285045 | 0.021331 | 6.29E-01 | 6.85E-01 |
| LOC285074 | 0.005788 | 8.96E-01 | 9.16E-01 |
| LOC285194 | -0.03637 | 4.10E-01 | 4.76E-01 |
| LOC285205 | 0.09365  | 3.36E-02 | 5.14E-02 |
| LOC285359 | -0.05306 | 2.29E-01 | 2.88E-01 |
| LOC285370 | 0.006582 | 8.82E-01 | 9.04E-01 |
| LOC285375 | 0.080392 | 6.83E-02 | 9.81E-02 |
| LOC285401 | 0.062582 | 1.56E-01 | 2.05E-01 |
| LOC285419 | -0.27154 | 3.72E-10 | 1.67E-09 |
| LOC285456 | -0.14049 | 1.39E-03 | 2.73E-03 |
| LOC285501 | 0.064958 | 1.41E-01 | 1.87E-01 |
| LOC285548 | 0.235715 | 6.21E-08 | 2.16E-07 |
| LOC285593 | -0.29588 | 7.26E-12 | 3.89E-11 |
| LOC285627 | -0.11826 | 7.22E-03 | 1.26E-02 |
| LOC285629 | -0.24816 | 1.15E-08 | 4.34E-08 |
| LOC285692 | 0.050973 | 2.48E-01 | 3.09E-01 |
| LOC285696 | 0.19864  | 5.57E-06 | 1.54E-05 |
| LOC285733 | 0.03697  | 4.02E-01 | 4.69E-01 |

|           |          |          |          |
|-----------|----------|----------|----------|
| LOC285735 | -0.08361 | 5.79E-02 | 8.43E-02 |
| LOC285740 | -0.01892 | 6.68E-01 | 7.20E-01 |
| LOC285768 | -0.28573 | 3.93E-11 | 1.94E-10 |
| LOC285780 | -0.11476 | 9.14E-03 | 1.56E-02 |
| LOC285796 | -0.20813 | 1.90E-06 | 5.56E-06 |
| LOC285830 | -0.10288 | 1.95E-02 | 3.13E-02 |
| LOC285847 | -0.0923  | 3.63E-02 | 5.50E-02 |
| LOC285954 | 0.035851 | 4.17E-01 | 4.83E-01 |
| LOC286002 | 0.076789 | 8.17E-02 | 1.15E-01 |
| LOC286094 | -0.17037 | 1.02E-04 | 2.38E-04 |
| LOC286135 | 0.075308 | 8.78E-02 | 1.23E-01 |
| LOC286238 | 0.117433 | 7.64E-03 | 1.32E-02 |
| LOC286359 | 0.127055 | 3.88E-03 | 7.09E-03 |
| LOC286367 | -0.28205 | 7.12E-11 | 3.44E-10 |
| LOC286467 | 0.26466  | 1.06E-09 | 4.51E-09 |
| LOC29034  | 0.179682 | 4.11E-05 | 1.01E-04 |
| LOC338588 | 0.071441 | 1.05E-01 | 1.44E-01 |
| LOC338651 | -0.21749 | 6.25E-07 | 1.95E-06 |
| LOC338758 | -0.07715 | 8.03E-02 | 1.13E-01 |
| LOC338799 | -0.16679 | 1.43E-04 | 3.26E-04 |
| LOC339047 | -0.34017 | 2.04E-15 | 1.54E-14 |
| LOC339240 | -0.10746 | 1.47E-02 | 2.42E-02 |
| LOC339290 | -0.16788 | 1.29E-04 | 2.97E-04 |
| LOC339524 | -0.32979 | 1.57E-14 | 1.09E-13 |
| LOC339535 | 0.108696 | 1.36E-02 | 2.25E-02 |
| LOC339568 | 0.097539 | 2.69E-02 | 4.19E-02 |
| LOC339674 | 0.426328 | 3.70E-24 | 6.13E-23 |
| LOC339788 | -0.10597 | 1.61E-02 | 2.64E-02 |
| LOC340017 | 0.048025 | 2.77E-01 | 3.39E-01 |
| LOC340074 | -0.02917 | 5.09E-01 | 5.73E-01 |
| LOC340357 | 0.009114 | 8.37E-01 | 8.66E-01 |
| LOC340508 | -0.07503 | 8.90E-02 | 1.24E-01 |
| LOC341056 | 0.196422 | 7.10E-06 | 1.94E-05 |
| LOC342346 | -0.29359 | 1.07E-11 | 5.62E-11 |
| LOC344595 | -0.0046  | 9.17E-01 | 9.34E-01 |
| LOC344967 | 0.066409 | 1.32E-01 | 1.77E-01 |
| LOC347376 | -0.03863 | 3.82E-01 | 4.48E-01 |
| LOC348021 | 0.030847 | 4.85E-01 | 5.50E-01 |
| LOC348840 | 0.077067 | 8.06E-02 | 1.14E-01 |
| LOC348926 | -0.08062 | 6.76E-02 | 9.71E-02 |
| LOC349114 | -0.07796 | 7.71E-02 | 1.09E-01 |
| LOC349196 | -0.31764 | 1.55E-13 | 9.85E-13 |
| LOC360030 | 0.062008 | 1.60E-01 | 2.09E-01 |
| LOC374443 | 0.089312 | 4.28E-02 | 6.40E-02 |

|           |          |          |          |
|-----------|----------|----------|----------|
| LOC374491 | 0.047999 | 2.77E-01 | 3.39E-01 |
| LOC375190 | -0.11189 | 1.11E-02 | 1.86E-02 |
| LOC387646 | 0.083466 | 5.84E-02 | 8.49E-02 |
| LOC387647 | 0.017931 | 6.85E-01 | 7.35E-01 |
| LOC388152 | -0.41769 | 3.67E-23 | 5.57E-22 |
| LOC388242 | 0.001804 | 9.67E-01 | 9.75E-01 |
| LOC388387 | -0.24321 | 2.27E-08 | 8.30E-08 |
| LOC388428 | 0.080661 | 6.74E-02 | 9.69E-02 |
| LOC388588 | -0.28977 | 2.02E-11 | 1.03E-10 |
| LOC388692 | -0.17105 | 9.57E-05 | 2.24E-04 |
| LOC388789 | 0.006181 | 8.89E-01 | 9.10E-01 |
| LOC388796 | 0.202765 | 3.51E-06 | 9.97E-06 |
| LOC388946 | 0.077702 | 7.81E-02 | 1.11E-01 |
| LOC388955 | 0.17368  | 7.43E-05 | 1.77E-04 |
| LOC389033 | -0.17392 | 7.26E-05 | 1.73E-04 |
| LOC389332 | 0.068073 | 1.23E-01 | 1.66E-01 |
| LOC389333 | 0.186751 | 2.00E-05 | 5.13E-05 |
| LOC389458 | 0.021312 | 6.29E-01 | 6.85E-01 |
| LOC389493 | 0.00039  | 9.93E-01 | 9.95E-01 |
| LOC389634 | 0.04543  | 3.03E-01 | 3.67E-01 |
| LOC389705 | -0.0608  | 1.68E-01 | 2.19E-01 |
| LOC389791 | -0.0326  | 4.60E-01 | 5.26E-01 |
| LOC390595 | -0.21985 | 4.68E-07 | 1.48E-06 |
| LOC390858 | 0.050948 | 2.48E-01 | 3.09E-01 |
| LOC391322 | -0.0576  | 1.92E-01 | 2.46E-01 |
| LOC392196 | -0.05863 | 1.84E-01 | 2.37E-01 |
| LOC399744 | -0.18852 | 1.66E-05 | 4.32E-05 |
| LOC399815 | 0.577973 | 3.13E-47 | 1.99E-45 |
| LOC399959 | -0.03263 | 4.60E-01 | 5.26E-01 |
| LOC400027 | -0.25124 | 7.44E-09 | 2.88E-08 |
| LOC400043 | -0.06019 | 1.73E-01 | 2.24E-01 |
| LOC400657 | -0.23277 | 9.14E-08 | 3.13E-07 |
| LOC400696 | 0.221467 | 3.84E-07 | 1.23E-06 |
| LOC400752 | -0.14084 | 1.35E-03 | 2.66E-03 |
| LOC400759 | 0.182107 | 3.22E-05 | 8.03E-05 |
| LOC400794 | -0.39705 | 6.79E-21 | 8.56E-20 |
| LOC400804 | -0.15609 | 3.77E-04 | 8.08E-04 |
| LOC400891 | -0.26776 | 6.62E-10 | 2.89E-09 |
| LOC400927 | -0.1371  | 1.82E-03 | 3.51E-03 |
| LOC400931 | -0.29675 | 6.27E-12 | 3.38E-11 |
| LOC400940 | -0.19908 | 5.30E-06 | 1.47E-05 |
| LOC401010 | 0.242829 | 2.39E-08 | 8.72E-08 |
| LOC401052 | -0.13004 | 3.11E-03 | 5.78E-03 |
| LOC401093 | -0.36133 | 2.50E-17 | 2.31E-16 |

|           |          |          |          |
|-----------|----------|----------|----------|
| LOC401127 | -0.1504  | 6.16E-04 | 1.28E-03 |
| LOC401387 | -0.08781 | 4.64E-02 | 6.89E-02 |
| LOC401397 | 0.095927 | 2.95E-02 | 4.56E-02 |
| LOC401431 | 0.06685  | 1.30E-01 | 1.74E-01 |
| LOC401463 | -0.21679 | 6.80E-07 | 2.10E-06 |
| LOC401588 | -0.00778 | 8.60E-01 | 8.86E-01 |
| LOC402377 | 0.122082 | 5.53E-03 | 9.86E-03 |
| LOC402644 | 0.045076 | 3.07E-01 | 3.71E-01 |
| LOC407835 | 0.149031 | 6.92E-04 | 1.43E-03 |
| LOC415056 | -0.03943 | 3.72E-01 | 4.38E-01 |
| LOC440040 | -0.06448 | 1.44E-01 | 1.91E-01 |
| LOC440173 | 0.152432 | 5.18E-04 | 1.09E-03 |
| LOC440354 | -0.09593 | 2.95E-02 | 4.56E-02 |
| LOC440356 | 0.248465 | 1.10E-08 | 4.16E-08 |
| LOC440461 | -0.06887 | 1.19E-01 | 1.60E-01 |
| LOC440563 | 0.067586 | 1.26E-01 | 1.69E-01 |
| LOC440896 | -0.18307 | 2.92E-05 | 7.32E-05 |
| LOC440905 | 0.168457 | 1.22E-04 | 2.82E-04 |
| LOC440925 | -0.05545 | 2.09E-01 | 2.65E-01 |
| LOC440944 | -0.15886 | 2.95E-04 | 6.43E-04 |
| LOC440957 | -0.10677 | 1.54E-02 | 2.52E-02 |
| LOC441046 | 0.160049 | 2.66E-04 | 5.82E-04 |
| LOC441089 | 0.412715 | 1.34E-22 | 1.93E-21 |
| LOC441177 | 0.138475 | 1.63E-03 | 3.17E-03 |
| LOC441204 | -0.21913 | 5.11E-07 | 1.61E-06 |
| LOC441208 | 0.164448 | 1.78E-04 | 4.00E-04 |
| LOC441294 | -0.05032 | 2.54E-01 | 3.15E-01 |
| LOC441454 | -0.04043 | 3.60E-01 | 4.26E-01 |
| LOC441455 | -0.01892 | 6.68E-01 | 7.20E-01 |
| LOC441601 | 0.103644 | 1.86E-02 | 3.00E-02 |
| LOC441666 | 0.160072 | 2.65E-04 | 5.81E-04 |
| LOC441869 | -0.37773 | 6.55E-19 | 6.89E-18 |
| LOC442308 | 0.234893 | 6.92E-08 | 2.40E-07 |
| LOC442421 | 0.125453 | 4.35E-03 | 7.90E-03 |
| LOC442454 | 0.026095 | 5.55E-01 | 6.16E-01 |
| LOC442459 | 0.098135 | 2.59E-02 | 4.06E-02 |
| LOC493754 | -0.12241 | 5.41E-03 | 9.65E-03 |
| LOC494141 | 0.026212 | 5.53E-01 | 6.14E-01 |
| LOC541471 | 0.414671 | 8.06E-23 | 1.18E-21 |
| LOC541473 | -0.10742 | 1.47E-02 | 2.43E-02 |
| LOC550112 | 0.166229 | 1.51E-04 | 3.42E-04 |
| LOC550643 | 0.153285 | 4.82E-04 | 1.01E-03 |
| LOC554202 | 0.255569 | 4.01E-09 | 1.60E-08 |
| LOC55908  | -0.1315  | 2.79E-03 | 5.22E-03 |

|           |          |          |          |
|-----------|----------|----------|----------|
| LOC572558 | -0.32197 | 6.92E-14 | 4.56E-13 |
| LOC595101 | -0.0034  | 9.39E-01 | 9.52E-01 |
| LOC606724 | -0.01216 | 7.83E-01 | 8.20E-01 |
| LOC613037 | -0.10245 | 2.00E-02 | 3.21E-02 |
| LOC619207 | -0.26225 | 1.51E-09 | 6.34E-09 |
| LOC641298 | -0.10137 | 2.14E-02 | 3.41E-02 |
| LOC641367 | 0.156435 | 3.66E-04 | 7.85E-04 |
| LOC642587 | -0.0152  | 7.31E-01 | 7.75E-01 |
| LOC642597 | 0.044477 | 3.14E-01 | 3.78E-01 |
| LOC642826 | -0.17516 | 6.44E-05 | 1.54E-04 |
| LOC642846 | 0.279658 | 1.04E-10 | 4.95E-10 |
| LOC642852 | -0.07812 | 7.65E-02 | 1.09E-01 |
| LOC642929 | 0.032316 | 4.64E-01 | 5.30E-01 |
| LOC643008 | -0.15829 | 3.11E-04 | 6.74E-04 |
| LOC643387 | 0.072348 | 1.01E-01 | 1.39E-01 |
| LOC643486 | 0.033192 | 4.52E-01 | 5.18E-01 |
| LOC643677 | 0.016342 | 7.11E-01 | 7.58E-01 |
| LOC643719 | -0.16386 | 1.88E-04 | 4.21E-04 |
| LOC643763 | -0.03256 | 4.61E-01 | 5.27E-01 |
| LOC643837 | -0.00192 | 9.65E-01 | 9.73E-01 |
| LOC643923 | -0.02423 | 5.83E-01 | 6.42E-01 |
| LOC643955 | 0.106127 | 1.60E-02 | 2.61E-02 |
| LOC644145 | 0.096624 | 2.83E-02 | 4.40E-02 |
| LOC644165 | -0.46285 | 1.05E-28 | 2.47E-27 |
| LOC644172 | -0.09665 | 2.83E-02 | 4.39E-02 |
| LOC644538 | -0.09154 | 3.78E-02 | 5.72E-02 |
| LOC644669 | 0.042922 | 3.31E-01 | 3.96E-01 |
| LOC644936 | 0.090277 | 4.06E-02 | 6.10E-02 |
| LOC645166 | 0.376363 | 8.93E-19 | 9.30E-18 |
| LOC645323 | -0.01419 | 7.48E-01 | 7.90E-01 |
| LOC645332 | -0.26385 | 1.19E-09 | 5.05E-09 |
| LOC645431 | -0.11447 | 9.32E-03 | 1.59E-02 |
| LOC645676 | -0.04376 | 3.22E-01 | 3.86E-01 |
| LOC645752 | -0.06374 | 1.49E-01 | 1.96E-01 |
| LOC646214 | 0.198956 | 5.37E-06 | 1.49E-05 |
| LOC646471 | -0.33486 | 5.85E-15 | 4.26E-14 |
| LOC646498 | -0.04476 | 3.11E-01 | 3.75E-01 |
| LOC646627 | 0.067893 | 1.24E-01 | 1.67E-01 |
| LOC646762 | -0.08762 | 4.69E-02 | 6.95E-02 |
| LOC646813 | 0.00275  | 9.50E-01 | 9.61E-01 |
| LOC646851 | -0.18118 | 3.54E-05 | 8.77E-05 |
| LOC646982 | -0.12237 | 5.42E-03 | 9.68E-03 |
| LOC646999 | 0.125317 | 4.40E-03 | 7.97E-03 |
| LOC647121 | -0.22445 | 2.65E-07 | 8.63E-07 |

|           |          |          |          |
|-----------|----------|----------|----------|
| LOC647288 | 0.051281 | 2.45E-01 | 3.05E-01 |
| LOC647309 | -0.15949 | 2.79E-04 | 6.10E-04 |
| LOC647859 | -0.00914 | 8.36E-01 | 8.65E-01 |
| LOC647946 | 0.534286 | 2.37E-39 | 1.06E-37 |
| LOC647979 | -0.19509 | 8.22E-06 | 2.23E-05 |
| LOC648691 | 0.296738 | 6.28E-12 | 3.39E-11 |
| LOC648740 | -0.4212  | 1.46E-23 | 2.30E-22 |
| LOC649330 | 0.232166 | 9.88E-08 | 3.38E-07 |
| LOC650293 | -0.00017 | 9.97E-01 | 9.97E-01 |
| LOC650368 | -0.16491 | 1.71E-04 | 3.84E-04 |
| LOC650623 | -0.16543 | 1.63E-04 | 3.67E-04 |
| LOC651250 | -0.18421 | 2.59E-05 | 6.56E-05 |
| LOC652276 | 0.034533 | 4.34E-01 | 5.01E-01 |
| LOC653113 | -0.24912 | 1.00E-08 | 3.82E-08 |
| LOC653501 | -0.36799 | 5.84E-18 | 5.64E-17 |
| LOC653544 | 0.003965 | 9.28E-01 | 9.43E-01 |
| LOC653566 | 0.095894 | 2.96E-02 | 4.57E-02 |
| LOC653653 | 0.084688 | 5.48E-02 | 8.01E-02 |
| LOC653786 | -0.14536 | 9.39E-04 | 1.89E-03 |
| LOC654342 | 0.237585 | 4.85E-08 | 1.71E-07 |
| LOC654433 | 0.009891 | 8.23E-01 | 8.54E-01 |
| LOC678655 | 0.008754 | 8.43E-01 | 8.72E-01 |
| LOC723809 | -0.47405 | 3.26E-30 | 8.55E-29 |
| LOC723972 | 0.079586 | 7.11E-02 | 1.02E-01 |
| LOC727677 | 0.036869 | 4.04E-01 | 4.70E-01 |
| LOC727896 | 0.242651 | 2.45E-08 | 8.93E-08 |
| LOC727924 | 0.076175 | 8.42E-02 | 1.18E-01 |
| LOC728024 | 0.035823 | 4.17E-01 | 4.84E-01 |
| LOC728190 | 0.032171 | 4.66E-01 | 5.32E-01 |
| LOC728264 | -0.36452 | 1.25E-17 | 1.18E-16 |
| LOC728276 | -0.2001  | 4.73E-06 | 1.32E-05 |
| LOC728323 | -0.00157 | 9.72E-01 | 9.78E-01 |
| LOC728392 | -0.39337 | 1.66E-20 | 2.02E-19 |
| LOC728554 | 0.26016  | 2.06E-09 | 8.48E-09 |
| LOC728606 | -0.05687 | 1.98E-01 | 2.52E-01 |
| LOC728613 | -0.02318 | 6.00E-01 | 6.57E-01 |
| LOC728640 | 0.07067  | 1.09E-01 | 1.49E-01 |
| LOC728643 | 0.213535 | 1.01E-06 | 3.04E-06 |
| LOC728723 | -0.16383 | 1.88E-04 | 4.22E-04 |
| LOC728743 | -0.0746  | 9.08E-02 | 1.26E-01 |
| LOC728758 | 0.249557 | 9.43E-09 | 3.61E-08 |
| LOC728819 | 0.169216 | 1.14E-04 | 2.64E-04 |
| LOC728855 | 0.049157 | 2.65E-01 | 3.27E-01 |
| LOC728875 | 0.139528 | 1.50E-03 | 2.93E-03 |

|                 |          |          |          |
|-----------------|----------|----------|----------|
| LOC728989       | -0.16608 | 1.53E-04 | 3.47E-04 |
| LOC729020       | 0.39646  | 7.85E-21 | 9.85E-20 |
| LOC729082       | 0.217829 | 6.00E-07 | 1.87E-06 |
| LOC729156       | -0.10219 | 2.04E-02 | 3.26E-02 |
| LOC729176       | 0.191091 | 1.26E-05 | 3.34E-05 |
| LOC729234       | -0.25817 | 2.75E-09 | 1.12E-08 |
| LOC729375       | -0.06371 | 1.49E-01 | 1.96E-01 |
| LOC729467       | 0.05539  | 2.10E-01 | 2.65E-01 |
| LOC729603       | -0.11011 | 1.24E-02 | 2.07E-02 |
| LOC729609       | -0.10126 | 2.15E-02 | 3.43E-02 |
| LOC729668       | 0.07465  | 9.06E-02 | 1.26E-01 |
| LOC729678       | -0.10926 | 1.31E-02 | 2.18E-02 |
| LOC729799       | -0.31239 | 4.03E-13 | 2.46E-12 |
| LOC729991-MEF2B | 0.047963 | 2.77E-01 | 3.39E-01 |
| LOC729991       | -0.05594 | 2.05E-01 | 2.61E-01 |
| LOC730101       | 0.170089 | 1.05E-04 | 2.44E-04 |
| LOC730668       | -0.06237 | 1.58E-01 | 2.06E-01 |
| LOC731779       | -0.00721 | 8.70E-01 | 8.94E-01 |
| LOC731789       | 0.269098 | 5.41E-10 | 2.39E-09 |
| LOC732275       | -0.01586 | 7.20E-01 | 7.66E-01 |
| LOC80054        | -0.38237 | 2.25E-19 | 2.49E-18 |
| LOC80154        | -0.43336 | 5.43E-25 | 9.56E-24 |
| LOC81691        | 0.387386 | 6.93E-20 | 8.00E-19 |
| LOC84740        | -0.18432 | 2.57E-05 | 6.50E-05 |
| LOC84856        | 0.043831 | 3.21E-01 | 3.86E-01 |
| LOC84931        | 0.121813 | 5.64E-03 | 1.00E-02 |
| LOC84989        | -0.10372 | 1.85E-02 | 2.99E-02 |
| LOC90110        | -0.38741 | 6.90E-20 | 7.97E-19 |
| LOC90246        | -0.09696 | 2.78E-02 | 4.32E-02 |
| LOC90586        | -0.23927 | 3.87E-08 | 1.38E-07 |
| LOC90784        | -0.06531 | 1.39E-01 | 1.85E-01 |
| LOC90834        | -0.26379 | 1.20E-09 | 5.10E-09 |
| LOC91149        | 0.185127 | 2.36E-05 | 6.01E-05 |
| LOC91316        | -0.27103 | 4.02E-10 | 1.80E-09 |
| LOC91450        | -0.18859 | 1.65E-05 | 4.29E-05 |
| LOC91948        | 0.004887 | 9.12E-01 | 9.29E-01 |
| LOC92249        | -0.29408 | 9.84E-12 | 5.19E-11 |
| LOC92659        | 0.196389 | 7.13E-06 | 1.95E-05 |
| LOC92973        | -0.45297 | 2.02E-27 | 4.33E-26 |
| LOC93432        | -0.01255 | 7.76E-01 | 8.14E-01 |
| LOC93622        | -0.07835 | 7.57E-02 | 1.07E-01 |
| LOC96610        | -0.00746 | 8.66E-01 | 8.91E-01 |
| LOH12CR1        | 0.158399 | 3.08E-04 | 6.68E-04 |
| LOH12CR2        | -0.02814 | 5.24E-01 | 5.88E-01 |

|          |          |          |          |
|----------|----------|----------|----------|
| LOH3CR2A | -0.35719 | 6.07E-17 | 5.39E-16 |
| LONP1    | 0.140314 | 1.41E-03 | 2.77E-03 |
| LONP2    | -0.12448 | 4.67E-03 | 8.43E-03 |
| LONRF1   | -0.18897 | 1.58E-05 | 4.13E-05 |
| LONRF2   | -0.2436  | 2.15E-08 | 7.89E-08 |
| LONRF3   | -0.17775 | 4.98E-05 | 1.21E-04 |
| LOR      | -0.17457 | 6.82E-05 | 1.63E-04 |
| LOXHD1   | -0.19588 | 7.54E-06 | 2.05E-05 |
| LOXL1    | -0.14615 | 8.79E-04 | 1.78E-03 |
| LOXL2    | 0.430864 | 1.08E-24 | 1.86E-23 |
| LOXL3    | 0.184477 | 2.53E-05 | 6.40E-05 |
| LOXL4    | -0.23593 | 6.04E-08 | 2.11E-07 |
| LOX      | 0.203033 | 3.40E-06 | 9.69E-06 |
| LPAL2    | -0.10015 | 2.30E-02 | 3.64E-02 |
| LPAR1    | -0.1267  | 3.98E-03 | 7.26E-03 |
| LPAR2    | 0.005763 | 8.96E-01 | 9.16E-01 |
| LPAR3    | -0.11682 | 7.96E-03 | 1.37E-02 |
| LPAR4    | 0.173042 | 7.91E-05 | 1.87E-04 |
| LPAR5    | -0.01711 | 6.99E-01 | 7.47E-01 |
| LPAR6    | -0.0957  | 2.99E-02 | 4.61E-02 |
| LPA      | -0.21259 | 1.12E-06 | 3.38E-06 |
| LPCAT1   | -0.21781 | 6.01E-07 | 1.87E-06 |
| LPCAT2   | -0.26745 | 6.95E-10 | 3.03E-09 |
| LPCAT3   | -0.21693 | 6.69E-07 | 2.07E-06 |
| LPCAT4   | 0.045513 | 3.03E-01 | 3.66E-01 |
| LPGAT1   | 0.200606 | 4.47E-06 | 1.26E-05 |
| LPHN1    | -0.18475 | 2.46E-05 | 6.23E-05 |
| LPHN2    | -0.08254 | 6.12E-02 | 8.88E-02 |
| LPHN3    | -0.00828 | 8.51E-01 | 8.79E-01 |
| LPIN1    | 0.049746 | 2.60E-01 | 3.21E-01 |
| LPIN2    | -0.29979 | 3.73E-12 | 2.07E-11 |
| LPIN3    | -0.19211 | 1.13E-05 | 3.01E-05 |
| LPL      | -0.39078 | 3.10E-20 | 3.70E-19 |
| LPO      | 0.105934 | 1.62E-02 | 2.64E-02 |
| LPPR1    | -0.34277 | 1.21E-15 | 9.37E-15 |
| LPPR2    | -0.14151 | 1.28E-03 | 2.54E-03 |
| LPPR3    | -0.09345 | 3.40E-02 | 5.19E-02 |
| LPPR4    | -0.37833 | 5.71E-19 | 6.04E-18 |
| LPPR5    | -0.12671 | 3.98E-03 | 7.26E-03 |
| LPP      | 0.053008 | 2.30E-01 | 2.88E-01 |
| LPXN     | -0.13391 | 2.33E-03 | 4.40E-03 |
| LQK1     | -0.03033 | 4.92E-01 | 5.57E-01 |
| LRAT     | -0.25174 | 6.93E-09 | 2.70E-08 |
| LRBA     | -0.16949 | 1.11E-04 | 2.57E-04 |



|         |          |          |          |
|---------|----------|----------|----------|
| LRCH1   | 0.020143 | 6.48E-01 | 7.02E-01 |
| LRCH2   | -0.04805 | 2.76E-01 | 3.38E-01 |
| LRCH3   | 0.114685 | 9.19E-03 | 1.57E-02 |
| LRCH4   | -0.32916 | 1.77E-14 | 1.23E-13 |
| LRDD    | -0.06905 | 1.18E-01 | 1.59E-01 |
| LRFN1   | 0.019095 | 6.66E-01 | 7.17E-01 |
| LRFN2   | 0.024631 | 5.77E-01 | 6.37E-01 |
| LRFN3   | 0.017897 | 6.85E-01 | 7.35E-01 |
| LRFN4   | 0.316929 | 1.76E-13 | 1.12E-12 |
| LRFN5   | -0.09359 | 3.37E-02 | 5.15E-02 |
| LRG1    | -0.23318 | 8.66E-08 | 2.98E-07 |
| LRGUK   | -0.11462 | 9.23E-03 | 1.58E-02 |
| LRIG1   | -0.43671 | 2.14E-25 | 3.90E-24 |
| LRIG2   | -0.06682 | 1.30E-01 | 1.74E-01 |
| LRIG3   | -0.22004 | 4.58E-07 | 1.45E-06 |
| LRIT1   | 0.083051 | 5.96E-02 | 8.66E-02 |
| LRIT2   | -0.0258  | 5.59E-01 | 6.20E-01 |
| LRIT3   | -0.36717 | 7.00E-18 | 6.73E-17 |
| LRMP    | -0.14266 | 1.17E-03 | 2.32E-03 |
| LRP10   | -0.08585 | 5.15E-02 | 7.58E-02 |
| LRP11   | 0.124564 | 4.64E-03 | 8.38E-03 |
| LRP12   | 0.335001 | 5.69E-15 | 4.14E-14 |
| LRP1B   | 0.064174 | 1.46E-01 | 1.93E-01 |
| LRP1    | -0.18715 | 1.91E-05 | 4.94E-05 |
| LRP2BP  | -0.53684 | 8.80E-40 | 4.03E-38 |
| LRP2    | -0.1671  | 1.39E-04 | 3.17E-04 |
| LRP3    | -0.17902 | 4.39E-05 | 1.08E-04 |
| LRP4    | 0.058698 | 1.84E-01 | 2.36E-01 |
| LRP5L   | -0.26328 | 1.30E-09 | 5.48E-09 |
| LRP5    | -0.08746 | 4.73E-02 | 7.00E-02 |
| LRP6    | -0.281   | 8.43E-11 | 4.04E-10 |
| LRP8    | 0.327815 | 2.29E-14 | 1.57E-13 |
| LRPAP1  | -0.25131 | 7.37E-09 | 2.85E-08 |
| LRPPRC  | 0.457368 | 5.49E-28 | 1.22E-26 |
| LRRC10B | -0.18441 | 2.54E-05 | 6.44E-05 |
| LRRC10  | 0.05809  | 1.88E-01 | 2.42E-01 |
| LRRC14B | 0.091089 | 3.88E-02 | 5.85E-02 |
| LRRC14  | -0.09952 | 2.39E-02 | 3.77E-02 |
| LRRC15  | 0.134993 | 2.14E-03 | 4.07E-03 |
| LRRC16A | 0.017379 | 6.94E-01 | 7.43E-01 |
| LRRC16B | -0.0514  | 2.44E-01 | 3.04E-01 |
| LRRC17  | -0.10749 | 1.47E-02 | 2.42E-02 |
| LRRC18  | -0.30648 | 1.16E-12 | 6.76E-12 |
| LRRC19  | -0.02504 | 5.71E-01 | 6.30E-01 |

|          |          |          |          |
|----------|----------|----------|----------|
| LRRC1    | 0.35279  | 1.54E-16 | 1.31E-15 |
| LRRC20   | -0.06347 | 1.50E-01 | 1.98E-01 |
| LRRC23   | -0.21141 | 1.29E-06 | 3.86E-06 |
| LRRC24   | -0.04948 | 2.62E-01 | 3.24E-01 |
| LRRC25   | 0.016175 | 7.14E-01 | 7.61E-01 |
| LRRC26   | -0.05725 | 1.95E-01 | 2.49E-01 |
| LRRC27   | -0.53593 | 1.26E-39 | 5.69E-38 |
| LRRC28   | 0.109633 | 1.28E-02 | 2.13E-02 |
| LRRC29   | -0.27095 | 4.07E-10 | 1.83E-09 |
| LRRC2    | -0.22949 | 1.40E-07 | 4.70E-07 |
| LRRC31   | -0.33    | 1.51E-14 | 1.05E-13 |
| LRRC32   | -0.1489  | 7.00E-04 | 1.44E-03 |
| LRRC33   | -0.10724 | 1.49E-02 | 2.45E-02 |
| LRRC34   | 0.021186 | 6.31E-01 | 6.87E-01 |
| LRRC36   | -0.45018 | 4.58E-27 | 9.48E-26 |
| LRRC37A2 | -0.15118 | 5.77E-04 | 1.20E-03 |
| LRRC37A3 | 0.014331 | 7.46E-01 | 7.88E-01 |
| LRRC37A4 | -0.17807 | 4.83E-05 | 1.18E-04 |
| LRRC37A  | -0.1986  | 5.59E-06 | 1.55E-05 |
| LRRC37B2 | 0.145105 | 9.58E-04 | 1.93E-03 |
| LRRC37B  | -0.17399 | 7.22E-05 | 1.72E-04 |
| LRRC39   | -0.1608  | 2.48E-04 | 5.47E-04 |
| LRRC3B   | -0.28387 | 5.31E-11 | 2.59E-10 |
| LRRC3    | -0.19222 | 1.12E-05 | 2.98E-05 |
| LRRC40   | 0.373534 | 1.70E-18 | 1.73E-17 |
| LRRC41   | -0.14501 | 9.66E-04 | 1.94E-03 |
| LRRC42   | 0.537802 | 6.06E-40 | 2.80E-38 |
| LRRC43   | -0.145   | 9.67E-04 | 1.95E-03 |
| LRRC45   | 0.062217 | 1.59E-01 | 2.08E-01 |
| LRRC46   | -0.20345 | 3.25E-06 | 9.26E-06 |
| LRRC47   | -0.08573 | 5.18E-02 | 7.62E-02 |
| LRRC48   | -0.39739 | 6.25E-21 | 7.92E-20 |
| LRRC49   | 0.002097 | 9.62E-01 | 9.70E-01 |
| LRRC4B   | -0.27591 | 1.89E-10 | 8.76E-10 |
| LRRC4C   | -0.22302 | 3.16E-07 | 1.02E-06 |
| LRRC4    | -0.25469 | 4.56E-09 | 1.81E-08 |
| LRRC50   | -0.30719 | 1.02E-12 | 6.00E-12 |
| LRRC52   | -0.29918 | 4.14E-12 | 2.28E-11 |
| LRRC55   | -0.20501 | 2.72E-06 | 7.81E-06 |
| LRRC56   | -0.41897 | 2.63E-23 | 4.05E-22 |
| LRRC57   | 0.089306 | 4.28E-02 | 6.40E-02 |
| LRRC58   | 0.201643 | 3.98E-06 | 1.12E-05 |
| LRRC59   | 0.532764 | 4.25E-39 | 1.87E-37 |
| LRRC61   | 0.215659 | 7.79E-07 | 2.40E-06 |

|         |          |          |          |
|---------|----------|----------|----------|
| LRRC66  | 0.094177 | 3.26E-02 | 5.00E-02 |
| LRRC67  | -0.24033 | 3.36E-08 | 1.21E-07 |
| LRRC69  | 0.090005 | 4.12E-02 | 6.18E-02 |
| LRRC6   | -0.19067 | 1.32E-05 | 3.48E-05 |
| LRRC70  | -0.22841 | 1.60E-07 | 5.35E-07 |
| LRRC7   | 0.148408 | 7.29E-04 | 1.50E-03 |
| LRRC8A  | 0.03086  | 4.85E-01 | 5.50E-01 |
| LRRC8B  | 0.116658 | 8.05E-03 | 1.39E-02 |
| LRRC8C  | -0.05329 | 2.27E-01 | 2.85E-01 |
| LRRC8D  | 0.168067 | 1.27E-04 | 2.92E-04 |
| LRRC8E  | -0.21986 | 4.68E-07 | 1.48E-06 |
| LRRC1   | 0.039175 | 3.75E-01 | 4.41E-01 |
| LRRFIP1 | -0.17298 | 7.95E-05 | 1.88E-04 |
| LRRFIP2 | -0.19207 | 1.14E-05 | 3.02E-05 |
| LRRIQ1  | -0.10262 | 1.98E-02 | 3.18E-02 |
| LRRIQ3  | 0.106966 | 1.52E-02 | 2.49E-02 |
| LRRIQ4  | 0.211044 | 1.35E-06 | 4.03E-06 |
| LRRK1   | -0.13413 | 2.29E-03 | 4.33E-03 |
| LRRK2   | -0.43329 | 5.54E-25 | 9.74E-24 |
| LRRN1   | -0.02331 | 5.98E-01 | 6.55E-01 |
| LRRN2   | -0.03931 | 3.73E-01 | 4.39E-01 |
| LRRN3   | -0.3839  | 1.57E-19 | 1.77E-18 |
| LRRN4CL | -0.17987 | 4.03E-05 | 9.93E-05 |
| LRRN4   | -0.26273 | 1.41E-09 | 5.92E-09 |
| LRRTM1  | -0.15673 | 3.57E-04 | 7.66E-04 |
| LRRTM2  | -0.11326 | 1.01E-02 | 1.71E-02 |
| LRRTM3  | 0.047861 | 2.78E-01 | 3.40E-01 |
| LRRTM4  | -0.09931 | 2.42E-02 | 3.81E-02 |
| LRSAM1  | -0.31503 | 2.50E-13 | 1.56E-12 |
| LRTM1   | 0.008968 | 8.39E-01 | 8.68E-01 |
| LRTM2   | 0.063523 | 1.50E-01 | 1.98E-01 |
| LRTOMT  | -0.2259  | 2.21E-07 | 7.25E-07 |
| LRWD1   | 0.26598  | 8.67E-10 | 3.73E-09 |
| LSAMP   | -0.3318  | 1.06E-14 | 7.53E-14 |
| LSG1    | 0.434193 | 4.31E-25 | 7.65E-24 |
| LSM10   | 0.092822 | 3.52E-02 | 5.36E-02 |
| LSM11   | 0.199523 | 5.05E-06 | 1.41E-05 |
| LSM12   | 0.531602 | 6.63E-39 | 2.88E-37 |
| LSM14A  | 0.262776 | 1.40E-09 | 5.88E-09 |
| LSM14B  | 0.005605 | 8.99E-01 | 9.19E-01 |
| LSM1    | 0.280104 | 9.73E-11 | 4.63E-10 |
| LSM2    | 0.329345 | 1.71E-14 | 1.19E-13 |
| LSM3    | 0.295952 | 7.18E-12 | 3.85E-11 |
| LSM4    | 0.244241 | 1.97E-08 | 7.27E-08 |

|           |          |          |          |
|-----------|----------|----------|----------|
| LSM5      | 0.466269 | 3.69E-29 | 8.96E-28 |
| LSM6      | 0.310497 | 5.67E-13 | 3.42E-12 |
| LSM7      | 0.178592 | 4.58E-05 | 1.12E-04 |
| LSMD1     | -0.06437 | 1.45E-01 | 1.91E-01 |
| LSP1      | -0.13775 | 1.73E-03 | 3.34E-03 |
| LSR       | 0.047566 | 2.81E-01 | 3.43E-01 |
| LSS       | -0.15181 | 5.47E-04 | 1.14E-03 |
| LST-3TM12 | -0.00224 | 9.60E-01 | 9.68E-01 |
| LST1      | -0.14975 | 6.51E-04 | 1.35E-03 |
| LTA4H     | -0.36247 | 1.96E-17 | 1.82E-16 |
| LTA       | -0.05945 | 1.78E-01 | 2.30E-01 |
| LTB4R2    | -0.04017 | 3.63E-01 | 4.29E-01 |
| LTB4R     | 0.03935  | 3.73E-01 | 4.39E-01 |
| LTBP1     | -0.01848 | 6.76E-01 | 7.26E-01 |
| LTBP2     | -0.44723 | 1.08E-26 | 2.17E-25 |
| LTBP3     | -0.41659 | 4.89E-23 | 7.34E-22 |
| LTBP4     | -0.40139 | 2.34E-21 | 3.06E-20 |
| LTBR      | 0.207036 | 2.15E-06 | 6.26E-06 |
| LTB       | -0.21093 | 1.37E-06 | 4.07E-06 |
| LTC4S     | -0.48913 | 2.48E-32 | 7.39E-31 |
| LTF       | -0.1452  | 9.51E-04 | 1.92E-03 |
| LTK       | -0.02412 | 5.85E-01 | 6.44E-01 |
| LTV1      | 0.367833 | 6.05E-18 | 5.83E-17 |
| LUC7L2    | 0.156899 | 3.51E-04 | 7.56E-04 |
| LUC7L3    | -0.2213  | 3.92E-07 | 1.25E-06 |
| LUC7L     | -0.29359 | 1.07E-11 | 5.62E-11 |
| LUM       | -0.10597 | 1.61E-02 | 2.64E-02 |
| LUZP1     | 0.072021 | 1.03E-01 | 1.41E-01 |
| LUZP2     | -0.3879  | 6.15E-20 | 7.14E-19 |
| LUZP4     | 0.084718 | 5.47E-02 | 8.00E-02 |
| LUZP6     | 0.415766 | 6.06E-23 | 9.04E-22 |
| LXN       | 0.039181 | 3.75E-01 | 4.41E-01 |
| LY6D      | 0.047342 | 2.84E-01 | 3.46E-01 |
| LY6E      | -0.14095 | 1.34E-03 | 2.64E-03 |
| LY6G5B    | -0.13456 | 2.21E-03 | 4.20E-03 |
| LY6G5C    | -0.32472 | 4.13E-14 | 2.78E-13 |
| LY6G6C    | 0.103569 | 1.87E-02 | 3.02E-02 |
| LY6G6D    | -0.03398 | 4.42E-01 | 5.08E-01 |
| LY6G6E    | -0.01749 | 6.92E-01 | 7.41E-01 |
| LY6G6F    | -0.08387 | 5.72E-02 | 8.33E-02 |
| LY6H      | -0.03791 | 3.91E-01 | 4.57E-01 |
| LY6K      | 0.190131 | 1.40E-05 | 3.67E-05 |
| LY75      | 0.013578 | 7.59E-01 | 7.99E-01 |
| LY86      | -0.25871 | 2.54E-09 | 1.04E-08 |

|          |          |          |          |
|----------|----------|----------|----------|
| LY96     | 0.027566 | 5.33E-01 | 5.96E-01 |
| LY9      | -0.2014  | 4.09E-06 | 1.15E-05 |
| LYAR     | 0.580151 | 1.18E-47 | 7.57E-46 |
| LYG1     | 0.103185 | 1.92E-02 | 3.08E-02 |
| LYG2     | 0.184237 | 2.59E-05 | 6.54E-05 |
| LYL1     | -0.27041 | 4.42E-10 | 1.97E-09 |
| LYNX1    | -0.26464 | 1.06E-09 | 4.52E-09 |
| LYN      | 0.089265 | 4.29E-02 | 6.41E-02 |
| LYPD1    | 0.11352  | 9.93E-03 | 1.69E-02 |
| LYPD2    | -0.14539 | 9.36E-04 | 1.89E-03 |
| LYPD3    | 0.327548 | 2.41E-14 | 1.65E-13 |
| LYPD4    | 0.098943 | 2.47E-02 | 3.89E-02 |
| LYPD5    | 0.287643 | 2.87E-11 | 1.44E-10 |
| LYPD6B   | 0.157876 | 3.22E-04 | 6.98E-04 |
| LYPD6    | 0.280828 | 8.67E-11 | 4.14E-10 |
| LYPLA1   | 0.25219  | 6.50E-09 | 2.54E-08 |
| LYPLA2P1 | -0.03367 | 4.46E-01 | 5.12E-01 |
| LYPLA2   | -0.10852 | 1.37E-02 | 2.28E-02 |
| LYPLAL1  | -0.14542 | 9.34E-04 | 1.88E-03 |
| LYRM1    | -0.1747  | 6.73E-05 | 1.61E-04 |
| LYRM2    | 0.08294  | 6.00E-02 | 8.71E-02 |
| LYRM4    | 0.082388 | 6.17E-02 | 8.94E-02 |
| LYRM5    | -0.0567  | 1.99E-01 | 2.54E-01 |
| LYRM7    | -0.07714 | 8.03E-02 | 1.13E-01 |
| LYSMD1   | 0.070175 | 1.12E-01 | 1.52E-01 |
| LYSMD2   | -0.02424 | 5.83E-01 | 6.42E-01 |
| LYSMD3   | -0.1661  | 1.53E-04 | 3.46E-04 |
| LYSMD4   | -0.21462 | 8.83E-07 | 2.69E-06 |
| LYST     | -0.26212 | 1.54E-09 | 6.45E-09 |
| LYVE1    | 0.002459 | 9.56E-01 | 9.65E-01 |
| LYZL1    | 0.110247 | 1.23E-02 | 2.06E-02 |
| LYZL2    | 0.180566 | 3.76E-05 | 9.30E-05 |
| LYZL4    | -0.00738 | 8.67E-01 | 8.92E-01 |
| LYZL6    | 0.036421 | 4.09E-01 | 4.76E-01 |
| LYZ      | -0.1041  | 1.81E-02 | 2.93E-02 |
| LZIC     | 0.299654 | 3.81E-12 | 2.11E-11 |
| LZTFL1   | -0.32375 | 4.96E-14 | 3.30E-13 |
| LZTR1    | -0.11258 | 1.06E-02 | 1.79E-02 |
| LZTS1    | 0.070825 | 1.08E-01 | 1.48E-01 |
| LZTS2    | -0.12422 | 4.76E-03 | 8.58E-03 |
| M6PR     | 0.232738 | 9.17E-08 | 3.14E-07 |
| MAB21L1  | -0.30832 | 8.37E-13 | 4.96E-12 |
| MAB21L2  | -0.12108 | 5.94E-03 | 1.05E-02 |
| MACC1    | -0.1913  | 1.24E-05 | 3.27E-05 |

|          |          |           |           |
|----------|----------|-----------|-----------|
| MACF1    | -0.27591 | 1.89E-10  | 8.76E-10  |
| MACROD1  | -0.11692 | 7.91E-03  | 1.37E-02  |
| MACROD2  | -0.37876 | 5.17E-19  | 5.51E-18  |
| MAD1L1   | 0.051255 | 2.46E-01  | 3.06E-01  |
| MAD2L1BP | 0.135318 | 2.09E-03  | 3.98E-03  |
| MAD2L1   | 0.867975 | 4.61E-158 | 3.68E-155 |
| MAD2L2   | 0.427637 | 2.59E-24  | 4.35E-23  |
| MADCAM1  | -0.05762 | 1.92E-01  | 2.46E-01  |
| MADD     | -0.26276 | 1.40E-09  | 5.89E-09  |
| MAEA     | 0.136774 | 1.86E-03  | 3.59E-03  |
| MAEL     | 1.08E-05 | 1.00E+00  | 1.00E+00  |
| MAF1     | -0.06983 | 1.13E-01  | 1.54E-01  |
| MAFA     | 0.094256 | 3.25E-02  | 4.98E-02  |
| MAFB     | 0.021056 | 6.34E-01  | 6.89E-01  |
| MAFF     | -0.03701 | 4.02E-01  | 4.68E-01  |
| MAFG     | 0.147612 | 7.79E-04  | 1.59E-03  |
| MAFK     | -0.02451 | 5.79E-01  | 6.38E-01  |
| MAF      | -0.07859 | 7.48E-02  | 1.06E-01  |
| MAGEA10  | 0.245996 | 1.55E-08  | 5.77E-08  |
| MAGEA11  | 0.249462 | 9.56E-09  | 3.66E-08  |
| MAGEA12  | 0.313973 | 3.03E-13  | 1.88E-12  |
| MAGEA1   | 0.260943 | 1.83E-09  | 7.61E-09  |
| MAGEA2   | 0.341138 | 1.68E-15  | 1.28E-14  |
| MAGEA3   | 0.371508 | 2.67E-18  | 2.67E-17  |
| MAGEA4   | 0.259544 | 2.25E-09  | 9.24E-09  |
| MAGEA5   | 0.164549 | 1.76E-04  | 3.97E-04  |
| MAGEA6   | 0.368122 | 5.67E-18  | 5.49E-17  |
| MAGEA8   | 0.186961 | 1.95E-05  | 5.03E-05  |
| MAGEA9B  | 0.272198 | 3.36E-10  | 1.52E-09  |
| MAGEB10  | 0.06591  | 1.35E-01  | 1.80E-01  |
| MAGEB16  | 0.143386 | 1.10E-03  | 2.20E-03  |
| MAGEB18  | 0.1721   | 8.66E-05  | 2.03E-04  |
| MAGEB1   | 0.195262 | 8.06E-06  | 2.19E-05  |
| MAGEB2   | 0.317731 | 1.52E-13  | 9.70E-13  |
| MAGEB3   | 0.162027 | 2.22E-04  | 4.93E-04  |
| MAGEB4   | 0.015975 | 7.18E-01  | 7.64E-01  |
| MAGEB6   | 0.257561 | 3.01E-09  | 1.22E-08  |
| MAGEC1   | 0.294607 | 9.01E-12  | 4.78E-11  |
| MAGEC2   | 0.313361 | 3.38E-13  | 2.09E-12  |
| MAGEC3   | 0.135525 | 2.05E-03  | 3.93E-03  |
| MAGED1   | -0.03991 | 3.66E-01  | 4.32E-01  |
| MAGED2   | -0.13031 | 3.05E-03  | 5.67E-03  |
| MAGED4B  | 0.044967 | 3.08E-01  | 3.72E-01  |
| MAGED4   | 0.038818 | 3.79E-01  | 4.46E-01  |

|        |          |          |          |
|--------|----------|----------|----------|
| MAGEE1 | -0.29135 | 1.56E-11 | 8.03E-11 |
| MAGEE2 | -0.27151 | 3.74E-10 | 1.68E-09 |
| MAGEF1 | 0.157275 | 3.40E-04 | 7.33E-04 |
| MAGEH1 | -0.20282 | 3.49E-06 | 9.91E-06 |
| MAGEL2 | -0.02045 | 6.43E-01 | 6.98E-01 |
| MAGI1  | -0.39068 | 3.17E-20 | 3.78E-19 |
| MAGI2  | -0.28677 | 3.31E-11 | 1.65E-10 |
| MAGI3  | -0.36524 | 1.07E-17 | 1.02E-16 |
| MAGIX  | -0.19594 | 7.49E-06 | 2.04E-05 |
| MAGOHB | 0.406993 | 5.75E-22 | 7.90E-21 |
| MAGOH  | 0.369757 | 3.95E-18 | 3.89E-17 |
| MAGT1  | 0.067263 | 1.27E-01 | 1.71E-01 |
| MAG    | -0.11623 | 8.29E-03 | 1.43E-02 |
| MAK16  | 0.204425 | 2.91E-06 | 8.33E-06 |
| MAK    | -0.16169 | 2.29E-04 | 5.08E-04 |
| MAL2   | -0.11851 | 7.09E-03 | 1.24E-02 |
| MALAT1 | -0.33475 | 5.97E-15 | 4.34E-14 |
| MALL   | -0.50067 | 4.99E-34 | 1.63E-32 |
| MALT1  | -0.00935 | 8.32E-01 | 8.62E-01 |
| MAL    | -0.32758 | 2.40E-14 | 1.64E-13 |
| MAMDC2 | -0.52492 | 8.27E-38 | 3.35E-36 |
| MAMDC4 | -0.21204 | 1.20E-06 | 3.60E-06 |
| MAML1  | -0.19761 | 6.23E-06 | 1.72E-05 |
| MAML2  | -0.26379 | 1.20E-09 | 5.10E-09 |
| MAML3  | -0.3423  | 1.33E-15 | 1.02E-14 |
| MAMLD1 | -0.02297 | 6.03E-01 | 6.60E-01 |
| MAMSTR | 0.226334 | 2.09E-07 | 6.88E-07 |
| MAN1A1 | -0.01889 | 6.69E-01 | 7.20E-01 |
| MAN1A2 | 0.098043 | 2.61E-02 | 4.08E-02 |
| MAN1B1 | 0.000452 | 9.92E-01 | 9.94E-01 |
| MAN1C1 | -0.37168 | 2.57E-18 | 2.58E-17 |
| MAN2A1 | 0.156133 | 3.76E-04 | 8.05E-04 |
| MAN2A2 | -0.17103 | 9.59E-05 | 2.24E-04 |
| MAN2B1 | -0.27083 | 4.15E-10 | 1.86E-09 |
| MAN2B2 | -0.26965 | 4.97E-10 | 2.20E-09 |
| MAN2C1 | -0.33285 | 8.66E-15 | 6.18E-14 |
| MANBAL | 0.022807 | 6.06E-01 | 6.63E-01 |
| MANBA  | -0.04411 | 3.18E-01 | 3.82E-01 |
| MANEAL | 0.004368 | 9.21E-01 | 9.37E-01 |
| MANEA  | 0.150802 | 5.96E-04 | 1.24E-03 |
| MANF   | 0.12554  | 4.33E-03 | 7.85E-03 |
| MANSC1 | 0.018769 | 6.71E-01 | 7.22E-01 |
| MAOA   | -0.44674 | 1.25E-26 | 2.48E-25 |
| MAOB   | -0.42075 | 1.64E-23 | 2.57E-22 |

|           |          |          |          |
|-----------|----------|----------|----------|
| MAP1A     | -0.10836 | 1.39E-02 | 2.30E-02 |
| MAP1B     | 0.136397 | 1.92E-03 | 3.69E-03 |
| MAP1D     | 0.040433 | 3.60E-01 | 4.26E-01 |
| MAP1LC3A  | -0.32932 | 1.72E-14 | 1.19E-13 |
| MAP1LC3B2 | 0.014018 | 7.51E-01 | 7.93E-01 |
| MAP1LC3B  | -0.12867 | 3.44E-03 | 6.35E-03 |
| MAP1LC3C  | -0.14751 | 7.86E-04 | 1.60E-03 |
| MAP1S     | -0.09258 | 3.57E-02 | 5.43E-02 |
| MAP2K1    | 0.256155 | 3.69E-09 | 1.48E-08 |
| MAP2K2    | 0.129979 | 3.13E-03 | 5.80E-03 |
| MAP2K3    | -0.14535 | 9.39E-04 | 1.89E-03 |
| MAP2K4    | -0.01135 | 7.97E-01 | 8.33E-01 |
| MAP2K5    | -0.19853 | 5.63E-06 | 1.56E-05 |
| MAP2K6    | 0.220736 | 4.20E-07 | 1.34E-06 |
| MAP2K7    | -0.1645  | 1.77E-04 | 3.98E-04 |
| MAP2      | 0.02017  | 6.48E-01 | 7.02E-01 |
| MAP3K10   | 0.140396 | 1.40E-03 | 2.75E-03 |
| MAP3K11   | -0.05337 | 2.27E-01 | 2.84E-01 |
| MAP3K12   | -0.15247 | 5.17E-04 | 1.08E-03 |
| MAP3K13   | -0.13933 | 1.53E-03 | 2.98E-03 |
| MAP3K14   | -0.09222 | 3.64E-02 | 5.52E-02 |
| MAP3K15   | -0.1997  | 4.95E-06 | 1.38E-05 |
| MAP3K1    | -0.27546 | 2.02E-10 | 9.37E-10 |
| MAP3K2    | 0.201511 | 4.04E-06 | 1.14E-05 |
| MAP3K3    | -0.43076 | 1.11E-24 | 1.91E-23 |
| MAP3K4    | -0.05022 | 2.55E-01 | 3.16E-01 |
| MAP3K5    | -0.08444 | 5.55E-02 | 8.11E-02 |
| MAP3K6    | -0.3414  | 1.60E-15 | 1.22E-14 |
| MAP3K7    | 0.300666 | 3.20E-12 | 1.79E-11 |
| MAP3K8    | -0.16629 | 1.50E-04 | 3.41E-04 |
| MAP3K9    | -0.0084  | 8.49E-01 | 8.77E-01 |
| MAP4K1    | -0.1017  | 2.10E-02 | 3.34E-02 |
| MAP4K2    | 0.099029 | 2.46E-02 | 3.87E-02 |
| MAP4K3    | 0.272239 | 3.34E-10 | 1.51E-09 |
| MAP4K4    | 0.255487 | 4.06E-09 | 1.62E-08 |
| MAP4K5    | 0.024208 | 5.84E-01 | 6.43E-01 |
| MAP4      | -0.04413 | 3.18E-01 | 3.82E-01 |
| MAP6D1    | 0.462029 | 1.35E-28 | 3.13E-27 |
| MAP6      | -0.45049 | 4.18E-27 | 8.68E-26 |
| MAP7D1    | 0.096733 | 2.82E-02 | 4.37E-02 |
| MAP7D2    | 0.08994  | 4.13E-02 | 6.20E-02 |
| MAP7D3    | 0.165323 | 1.64E-04 | 3.71E-04 |
| MAP7      | 0.139709 | 1.48E-03 | 2.90E-03 |
| MAP9      | -0.18313 | 2.90E-05 | 7.28E-05 |



|           |        |          |          |          |
|-----------|--------|----------|----------|----------|
| MAPK10    |        | -0.44498 | 2.06E-26 | 4.07E-25 |
| MAPK11    |        | -0.03245 | 4.62E-01 | 5.28E-01 |
| MAPK12    |        | 0.245451 | 1.67E-08 | 6.20E-08 |
| MAPK13    |        | 0.047848 | 2.78E-01 | 3.40E-01 |
| MAPK14    |        | 0.048173 | 2.75E-01 | 3.37E-01 |
| MAPK15    |        | -0.37026 | 3.53E-18 | 3.49E-17 |
| MAPK1IP1L |        | 0.061263 | 1.65E-01 | 2.15E-01 |
| MAPK1     |        | 0.006559 | 8.82E-01 | 9.04E-01 |
| MAPK3     |        | -0.07221 | 1.02E-01 | 1.40E-01 |
| MAPK4     |        | -0.13951 | 1.50E-03 | 2.94E-03 |
| MAPK6     |        | 0.538017 | 5.57E-40 | 2.58E-38 |
| MAPK7     |        | -0.0243  | 5.82E-01 | 6.41E-01 |
| MAPK8IP1  |        | -0.22597 | 2.19E-07 | 7.20E-07 |
| MAPK8IP2  |        | 0.157629 | 3.29E-04 | 7.12E-04 |
| MAPK8IP3  |        | -0.27281 | 3.06E-10 | 1.39E-09 |
| MAPK8     |        | 0.307079 | 1.04E-12 | 6.11E-12 |
| MAPK9     |        | -0.15704 | 3.47E-04 | 7.47E-04 |
| MAPKAP1   |        | 0.031521 | 4.75E-01 | 5.41E-01 |
| MAPKAPK2  |        | -0.20607 | 2.41E-06 | 6.95E-06 |
| MAPKAPK3  |        | -0.14226 | 1.21E-03 | 2.40E-03 |
| MAPKAPK5  |        | 0.434918 | 3.53E-25 | 6.31E-24 |
| MAPKBP1   |        | -0.24222 | 2.60E-08 | 9.44E-08 |
| MAPKSP1   |        | -0.05307 | 2.29E-01 | 2.88E-01 |
| MAPRE1    |        | 0.492102 | 9.18E-33 | 2.79E-31 |
| MAPRE2    |        | -0.06914 | 1.17E-01 | 1.59E-01 |
| MAPRE3    |        | -0.25167 | 7.00E-09 | 2.72E-08 |
| MAPT      |        | -0.13534 | 2.08E-03 | 3.98E-03 |
|           | 10-Mar | -0.12832 | 3.53E-03 | 6.50E-03 |
|           | 11-Mar | 0.09765  | 2.67E-02 | 4.16E-02 |
|           | 1-Mar  | 0.010875 | 8.06E-01 | 8.39E-01 |
|           | 2-Mar  | -0.16696 | 1.41E-04 | 3.21E-04 |
|           | 3-Mar  | 0.082277 | 6.21E-02 | 8.99E-02 |
|           | 4-Mar  | -0.02804 | 5.26E-01 | 5.89E-01 |
|           | 5-Mar  | 0.221565 | 3.79E-07 | 1.21E-06 |
|           | 6-Mar  | 0.145437 | 9.33E-04 | 1.88E-03 |
|           | 7-Mar  | 0.222246 | 3.48E-07 | 1.12E-06 |
|           | 8-Mar  | -0.10528 | 1.68E-02 | 2.74E-02 |
|           | 9-Mar  | -0.21206 | 1.20E-06 | 3.59E-06 |
| MARCKSL1  |        | 0.306426 | 1.17E-12 | 6.82E-12 |
| MARCKS    |        | 0.379476 | 4.38E-19 | 4.69E-18 |
| MARCO     |        | -0.16757 | 1.33E-04 | 3.05E-04 |
| MARK1     |        | 0.098374 | 2.56E-02 | 4.00E-02 |
| MARK2     |        | 0.123269 | 5.09E-03 | 9.13E-03 |
| MARK3     |        | 0.042221 | 3.39E-01 | 4.04E-01 |

|          |          |          |          |
|----------|----------|----------|----------|
| MARK4    | 0.182533 | 3.08E-05 | 7.71E-05 |
| MARS2    | 0.277727 | 1.42E-10 | 6.65E-10 |
| MARS     | 0.521827 | 2.61E-37 | 1.01E-35 |
| MARVELD1 | 0.061826 | 1.61E-01 | 2.11E-01 |
| MARVELD2 | -0.23913 | 3.94E-08 | 1.40E-07 |
| MARVELD3 | 0.059231 | 1.80E-01 | 2.32E-01 |
| MAS1L    | -0.3363  | 4.40E-15 | 3.24E-14 |
| MAS1     | 0.045675 | 3.01E-01 | 3.64E-01 |
| MASP1    | -0.27274 | 3.09E-10 | 1.41E-09 |
| MASP2    | -0.34524 | 7.32E-16 | 5.82E-15 |
| MAST1    | 0.320922 | 8.43E-14 | 5.50E-13 |
| MAST2    | 0.244022 | 2.03E-08 | 7.47E-08 |
| MAST3    | -0.28974 | 2.03E-11 | 1.04E-10 |
| MAST4    | -0.4147  | 8.00E-23 | 1.17E-21 |
| MASTL    | 0.664044 | 8.78E-67 | 8.78E-65 |
| MAT1A    | 0.209121 | 1.69E-06 | 4.99E-06 |
| MAT2A    | -0.21758 | 6.18E-07 | 1.92E-06 |
| MAT2B    | -0.18401 | 2.65E-05 | 6.69E-05 |
| MATK     | -0.1533  | 4.81E-04 | 1.01E-03 |
| MATN1    | 0.000503 | 9.91E-01 | 9.93E-01 |
| MATN2    | -0.21745 | 6.28E-07 | 1.95E-06 |
| MATN3    | -0.1963  | 7.20E-06 | 1.96E-05 |
| MATN4    | -0.04826 | 2.74E-01 | 3.36E-01 |
| MATR3    | 0.005761 | 8.96E-01 | 9.16E-01 |
| MAVS     | -0.18844 | 1.67E-05 | 4.35E-05 |
| MAX      | -0.04049 | 3.59E-01 | 4.25E-01 |
| MAZ      | 0.214796 | 8.65E-07 | 2.64E-06 |
| MBD1     | 0.010259 | 8.16E-01 | 8.49E-01 |
| MBD2     | 0.088861 | 4.38E-02 | 6.54E-02 |
| MBD3L1   | 0.066223 | 1.33E-01 | 1.78E-01 |
| MBD3L2   | 0.013368 | 7.62E-01 | 8.02E-01 |
| MBD3L5   | 0.057653 | 1.91E-01 | 2.45E-01 |
| MBD3     | 0.025414 | 5.65E-01 | 6.25E-01 |
| MBD4     | 0.261885 | 1.60E-09 | 6.67E-09 |
| MBD5     | -0.11327 | 1.01E-02 | 1.71E-02 |
| MBD6     | -0.14764 | 7.77E-04 | 1.59E-03 |
| MBIP     | -0.39771 | 5.78E-21 | 7.34E-20 |
| MBL1P    | -0.49656 | 2.04E-33 | 6.41E-32 |
| MBL2     | -0.04271 | 3.33E-01 | 3.99E-01 |
| MBLAC1   | 0.039266 | 3.74E-01 | 4.40E-01 |
| MBLAC2   | -0.30673 | 1.11E-12 | 6.48E-12 |
| MBNL1    | -0.22011 | 4.54E-07 | 1.44E-06 |
| MBNL2    | -0.30255 | 2.31E-12 | 1.31E-11 |
| MBNL3    | -0.05616 | 2.03E-01 | 2.59E-01 |

|          |          |           |           |
|----------|----------|-----------|-----------|
| MBOAT1   | 0.022007 | 6.18E-01  | 6.75E-01  |
| MBOAT2   | 0.195977 | 7.46E-06  | 2.03E-05  |
| MBOAT4   | -0.07551 | 8.69E-02  | 1.21E-01  |
| MBOAT7   | 0.010452 | 8.13E-01  | 8.45E-01  |
| MBP      | -0.11248 | 1.06E-02  | 1.80E-02  |
| MBTD1    | -0.07521 | 8.82E-02  | 1.23E-01  |
| MBTPS1   | -0.18337 | 2.83E-05  | 7.11E-05  |
| MBTPS2   | 0.213733 | 9.82E-07  | 2.97E-06  |
| MB       | 0.157993 | 3.19E-04  | 6.91E-04  |
| MC1R     | 0.184147 | 2.61E-05  | 6.60E-05  |
| MC2R     | -0.17517 | 6.43E-05  | 1.54E-04  |
| MC3R     | 0.010809 | 8.07E-01  | 8.40E-01  |
| MC4R     | -0.16379 | 1.89E-04  | 4.23E-04  |
| MC5R     | -0.31096 | 5.22E-13  | 3.16E-12  |
| MCAM     | 0.18183  | 3.31E-05  | 8.24E-05  |
| MCART1   | 0.155214 | 4.07E-04  | 8.67E-04  |
| MCART2   | 0.166385 | 1.49E-04  | 3.38E-04  |
| MCART3P  | 0.052763 | 2.32E-01  | 2.90E-01  |
| MCART6   | -0.00115 | 9.79E-01  | 9.84E-01  |
| MCAT     | -0.07441 | 9.16E-02  | 1.27E-01  |
| MCCC1    | -0.26442 | 1.10E-09  | 4.67E-09  |
| MCCC2    | -0.09032 | 4.05E-02  | 6.09E-02  |
| MCCD1    | -0.07889 | 7.37E-02  | 1.05E-01  |
| MCC      | -0.26614 | 8.46E-10  | 3.65E-09  |
| MCEE     | -0.25242 | 6.29E-09  | 2.46E-08  |
| MCF2L2   | 0.362561 | 1.92E-17  | 1.79E-16  |
| MCF2L    | -0.21139 | 1.30E-06  | 3.87E-06  |
| MCF2     | 0.065421 | 1.38E-01  | 1.84E-01  |
| MCFD2    | 0.283406 | 5.73E-11  | 2.78E-10  |
| MCHR1    | 0.262376 | 1.48E-09  | 6.23E-09  |
| MCHR2    | 0.199256 | 5.20E-06  | 1.45E-05  |
| MCL1     | -0.10375 | 1.85E-02  | 2.98E-02  |
| MCM10    | 0.853136 | 4.44E-147 | 2.16E-144 |
| MCM2     | 0.752433 | 4.43E-95  | 6.46E-93  |
| MCM3APAS | 0.090308 | 4.05E-02  | 6.09E-02  |
| MCM3AP   | -0.14005 | 1.44E-03  | 2.83E-03  |
| MCM3     | 0.537915 | 5.80E-40  | 2.68E-38  |
| MCM4     | 0.758375 | 2.06E-97  | 3.16E-95  |
| MCM5     | 0.549688 | 5.35E-42  | 2.71E-40  |
| MCM6     | 0.823767 | 1.55E-128 | 4.30E-126 |
| MCM7     | 0.637134 | 5.35E-60  | 4.59E-58  |
| MCM8     | 0.582573 | 3.94E-48  | 2.56E-46  |
| MCM9     | -0.07224 | 1.02E-01  | 1.39E-01  |
| MCOLN1   | -0.07909 | 7.29E-02  | 1.04E-01  |

|        |          |          |          |
|--------|----------|----------|----------|
| MCOLN2 | 0.027896 | 5.28E-01 | 5.91E-01 |
| MCOLN3 | 0.128352 | 3.53E-03 | 6.49E-03 |
| MCPH1  | -0.00985 | 8.24E-01 | 8.55E-01 |
| MCRS1  | 0.261877 | 1.60E-09 | 6.67E-09 |
| MCTP1  | 0.047043 | 2.87E-01 | 3.49E-01 |
| MCTP2  | -0.25557 | 4.01E-09 | 1.60E-08 |
| MCTS1  | 0.175838 | 6.02E-05 | 1.45E-04 |
| MDC1   | 0.21685  | 6.75E-07 | 2.09E-06 |
| MDFIC  | 0.117304 | 7.70E-03 | 1.33E-02 |
| MDFI   | 0.255564 | 4.02E-09 | 1.60E-08 |
| MDGA1  | -0.1196  | 6.58E-03 | 1.15E-02 |
| MDGA2  | 0.236978 | 5.25E-08 | 1.84E-07 |
| MDH1B  | -0.13591 | 1.99E-03 | 3.82E-03 |
| MDH1   | 0.440524 | 7.34E-26 | 1.39E-24 |
| MDH2   | 0.283326 | 5.80E-11 | 2.81E-10 |
| MDK    | 0.152115 | 5.33E-04 | 1.11E-03 |
| MDM1   | 0.087771 | 4.65E-02 | 6.90E-02 |
| MDM2   | -0.01835 | 6.78E-01 | 7.28E-01 |
| MDM4   | -0.34045 | 1.93E-15 | 1.46E-14 |
| MDN1   | -0.04788 | 2.78E-01 | 3.40E-01 |
| MDP1   | 0.021951 | 6.19E-01 | 6.75E-01 |
| MDS2   | -0.15536 | 4.02E-04 | 8.57E-04 |
| ME1    | 0.17103  | 9.59E-05 | 2.24E-04 |
| ME2    | 0.191856 | 1.16E-05 | 3.09E-05 |
| ME3    | -0.1124  | 1.07E-02 | 1.81E-02 |
| MEA1   | 0.243078 | 2.31E-08 | 8.44E-08 |
| MEAF6  | -0.20789 | 1.95E-06 | 5.71E-06 |
| MECOM  | -0.4343  | 4.18E-25 | 7.43E-24 |
| MECP2  | -0.25739 | 3.09E-09 | 1.25E-08 |
| MECR   | -0.1619  | 2.25E-04 | 4.99E-04 |
| MED10  | 0.286482 | 3.48E-11 | 1.72E-10 |
| MED11  | -0.34189 | 1.44E-15 | 1.11E-14 |
| MED12L | 0.2195   | 4.89E-07 | 1.54E-06 |
| MED12  | -0.02863 | 5.17E-01 | 5.81E-01 |
| MED13L | -0.11899 | 6.87E-03 | 1.20E-02 |
| MED13  | 0.046553 | 2.92E-01 | 3.54E-01 |
| MED14  | 0.232862 | 9.03E-08 | 3.10E-07 |
| MED15  | -0.05022 | 2.55E-01 | 3.16E-01 |
| MED16  | -0.17595 | 5.96E-05 | 1.44E-04 |
| MED17  | 0.082915 | 6.01E-02 | 8.72E-02 |
| MED18  | -0.03406 | 4.40E-01 | 5.07E-01 |
| MED19  | 0.140098 | 1.44E-03 | 2.82E-03 |
| MED1   | 0.179815 | 4.06E-05 | 9.98E-05 |
| MED20  | 0.213069 | 1.06E-06 | 3.21E-06 |

|         |          |           |           |
|---------|----------|-----------|-----------|
| MED21   | 0.160196 | 2.62E-04  | 5.75E-04  |
| MED22   | -0.05941 | 1.78E-01  | 2.31E-01  |
| MED23   | 0.011441 | 7.96E-01  | 8.31E-01  |
| MED24   | 0.112953 | 1.03E-02  | 1.75E-02  |
| MED25   | -0.16543 | 1.63E-04  | 3.67E-04  |
| MED26   | -0.31145 | 4.78E-13  | 2.90E-12  |
| MED27   | 0.345968 | 6.31E-16  | 5.06E-15  |
| MED28   | 0.312374 | 4.05E-13  | 2.47E-12  |
| MED29   | -0.16314 | 2.01E-04  | 4.48E-04  |
| MED30   | 0.188535 | 1.66E-05  | 4.31E-05  |
| MED31   | 0.042262 | 3.38E-01  | 4.04E-01  |
| MED4    | -0.11434 | 9.41E-03  | 1.60E-02  |
| MED6    | 0.347519 | 4.59E-16  | 3.72E-15  |
| MED7    | -0.15718 | 3.43E-04  | 7.39E-04  |
| MED8    | 0.205321 | 2.62E-06  | 7.55E-06  |
| MED9    | -0.24522 | 1.72E-08  | 6.39E-08  |
| MEF2A   | -0.28855 | 2.48E-11  | 1.25E-10  |
| MEF2B   | 0.004445 | 9.20E-01  | 9.36E-01  |
| MEF2C   | -0.35109 | 2.20E-16  | 1.84E-15  |
| MEF2D   | -0.26223 | 1.52E-09  | 6.36E-09  |
| MEFV    | 0.123952 | 4.85E-03  | 8.73E-03  |
| MEG3    | -0.14204 | 1.23E-03  | 2.44E-03  |
| MEG8    | -0.08755 | 4.71E-02  | 6.97E-02  |
| MEGF10  | 0.101479 | 2.13E-02  | 3.38E-02  |
| MEGF11  | -0.29446 | 9.25E-12  | 4.90E-11  |
| MEGF6   | -0.46035 | 2.24E-28  | 5.14E-27  |
| MEGF8   | -0.07108 | 1.07E-01  | 1.46E-01  |
| MEGF9   | -0.35344 | 1.34E-16  | 1.15E-15  |
| MEI1    | -0.08431 | 5.59E-02  | 8.15E-02  |
| MEIG1   | -0.05693 | 1.97E-01  | 2.52E-01  |
| MEIS1   | -0.25007 | 8.77E-09  | 3.37E-08  |
| MEIS2   | -0.13461 | 2.20E-03  | 4.19E-03  |
| MEIS3P1 | -0.28414 | 5.09E-11  | 2.48E-10  |
| MEIS3   | 0.141398 | 1.29E-03  | 2.56E-03  |
| MELK    | 0.870959 | 1.96E-160 | 1.78E-157 |
| MEMO1   | 0.424548 | 5.96E-24  | 9.73E-23  |
| MEN1    | 0.086943 | 4.86E-02  | 7.18E-02  |
| MEOX1   | -0.33041 | 1.39E-14  | 9.74E-14  |
| MEOX2   | -0.34995 | 2.78E-16  | 2.30E-15  |
| MEP1A   | -0.05716 | 1.95E-01  | 2.50E-01  |
| MEP1B   | 0.12504  | 4.48E-03  | 8.11E-03  |
| MEPCE   | 0.013522 | 7.60E-01  | 8.00E-01  |
| MEPE    | 0.001764 | 9.68E-01  | 9.75E-01  |
| MERTK   | -0.10515 | 1.70E-02  | 2.76E-02  |

|           |          |          |          |
|-----------|----------|----------|----------|
| MESDC1    | 0.13653  | 1.90E-03 | 3.65E-03 |
| MESDC2    | 0.221187 | 3.97E-07 | 1.27E-06 |
| MESP1     | -0.18487 | 2.43E-05 | 6.16E-05 |
| MESP2     | -0.01801 | 6.84E-01 | 7.33E-01 |
| MESTIT1   | -0.09426 | 3.25E-02 | 4.98E-02 |
| MEST      | 0.508521 | 3.22E-35 | 1.12E-33 |
| METAP1    | 0.287279 | 3.05E-11 | 1.53E-10 |
| METAP2    | 0.258661 | 2.56E-09 | 1.04E-08 |
| METRNL    | 0.021906 | 6.20E-01 | 6.76E-01 |
| METRNL    | -0.27782 | 1.40E-10 | 6.57E-10 |
| METT10D   | -0.29838 | 4.75E-12 | 2.60E-11 |
| METT11D1  | -0.00133 | 9.76E-01 | 9.82E-01 |
| METT5D1   | -0.09978 | 2.35E-02 | 3.72E-02 |
| METTLL10  | 0.273279 | 2.84E-10 | 1.30E-09 |
| METTLL11A | 0.289585 | 2.09E-11 | 1.06E-10 |
| METTLL11B | 0.121224 | 5.88E-03 | 1.04E-02 |
| METTLL12  | 0.008661 | 8.45E-01 | 8.73E-01 |
| METTLL13  | 0.065941 | 1.35E-01 | 1.80E-01 |
| METTLL14  | -0.06315 | 1.52E-01 | 2.01E-01 |
| METTLL1   | 0.299357 | 4.01E-12 | 2.22E-11 |
| METTLL2A  | 0.499602 | 7.21E-34 | 2.34E-32 |
| METTLL2B  | 0.423162 | 8.64E-24 | 1.39E-22 |
| METTLL3   | -0.06776 | 1.25E-01 | 1.68E-01 |
| METTLL4   | 0.324134 | 4.61E-14 | 3.08E-13 |
| METTLL5   | 0.408694 | 3.74E-22 | 5.22E-21 |
| METTLL6   | 0.238151 | 4.49E-08 | 1.59E-07 |
| METTLL7A  | -0.48713 | 4.79E-32 | 1.40E-30 |
| METTLL7B  | -0.10263 | 1.98E-02 | 3.18E-02 |
| METTLL8   | 0.411534 | 1.81E-22 | 2.59E-21 |
| METTLL9   | 0.203237 | 3.33E-06 | 9.48E-06 |
| MET       | 0.047904 | 2.78E-01 | 3.40E-01 |
| MEX3A     | 0.221159 | 3.99E-07 | 1.27E-06 |
| MEX3B     | 0.078932 | 7.35E-02 | 1.05E-01 |
| MEX3C     | 0.138007 | 1.69E-03 | 3.28E-03 |
| MEX3D     | 0.295184 | 8.18E-12 | 4.35E-11 |
| MFAP1     | 0.020931 | 6.36E-01 | 6.91E-01 |
| MFAP2     | 0.136541 | 1.90E-03 | 3.65E-03 |
| MFAP3L    | -0.0722  | 1.02E-01 | 1.40E-01 |
| MFAP3     | 0.052777 | 2.32E-01 | 2.90E-01 |
| MFAP4     | -0.52308 | 1.64E-37 | 6.46E-36 |
| MFAP5     | 0.216856 | 6.75E-07 | 2.09E-06 |
| MFF       | 0.221747 | 3.71E-07 | 1.19E-06 |
| MFGE8     | -0.0558  | 2.06E-01 | 2.62E-01 |
| MFHAS1    | -0.07581 | 8.57E-02 | 1.20E-01 |

|          |          |          |          |
|----------|----------|----------|----------|
| MF12     | 0.421129 | 1.48E-23 | 2.34E-22 |
| MFN1     | 0.414042 | 9.48E-23 | 1.38E-21 |
| MFN2     | 0.008007 | 8.56E-01 | 8.83E-01 |
| MFNG     | -0.26571 | 9.03E-10 | 3.88E-09 |
| MFRP     | -0.19059 | 1.33E-05 | 3.50E-05 |
| MFSD10   | -0.25967 | 2.21E-09 | 9.07E-09 |
| MFSD11   | 0.172252 | 8.53E-05 | 2.01E-04 |
| MFSD1    | 0.007828 | 8.59E-01 | 8.85E-01 |
| MFSD2A   | -0.38142 | 2.80E-19 | 3.06E-18 |
| MFSD2B   | 0.524022 | 1.16E-37 | 4.61E-36 |
| MFSD3    | -0.02782 | 5.29E-01 | 5.92E-01 |
| MFSD4    | -0.28632 | 3.57E-11 | 1.77E-10 |
| MFSD5    | 0.120574 | 6.15E-03 | 1.09E-02 |
| MFSD6L   | -0.10619 | 1.59E-02 | 2.60E-02 |
| MFSD6    | -0.15657 | 3.62E-04 | 7.77E-04 |
| MFSD7    | -0.33517 | 5.50E-15 | 4.01E-14 |
| MFSD8    | -0.06556 | 1.37E-01 | 1.83E-01 |
| MFSD9    | 0.215619 | 7.83E-07 | 2.41E-06 |
| MGAM     | -0.01494 | 7.35E-01 | 7.79E-01 |
| MGAT1    | -0.13649 | 1.91E-03 | 3.67E-03 |
| MGAT2    | 0.283337 | 5.79E-11 | 2.81E-10 |
| MGAT3    | -0.21689 | 6.72E-07 | 2.08E-06 |
| MGAT4A   | 0.073134 | 9.73E-02 | 1.34E-01 |
| MGAT4B   | 0.049121 | 2.66E-01 | 3.27E-01 |
| MGAT4C   | 0.135181 | 2.11E-03 | 4.02E-03 |
| MGAT5B   | 0.27543  | 2.03E-10 | 9.41E-10 |
| MGAT5    | 0.06209  | 1.59E-01 | 2.09E-01 |
| MGA      | -0.01088 | 8.05E-01 | 8.39E-01 |
| MGC12916 | 0.062574 | 1.56E-01 | 2.05E-01 |
| MGC12982 | 0.147604 | 7.80E-04 | 1.59E-03 |
| MGC14436 | 0.233106 | 8.74E-08 | 3.00E-07 |
| MGC15885 | 0.077927 | 7.73E-02 | 1.09E-01 |
| MGC16025 | 0.120153 | 6.33E-03 | 1.12E-02 |
| MGC16121 | 0.004197 | 9.24E-01 | 9.40E-01 |
| MGC16142 | 0.092674 | 3.55E-02 | 5.40E-02 |
| MGC16275 | -0.2758  | 1.92E-10 | 8.90E-10 |
| MGC16384 | -0.06271 | 1.55E-01 | 2.04E-01 |
| MGC16703 | -0.13226 | 2.64E-03 | 4.95E-03 |
| MGC21881 | -0.14956 | 6.61E-04 | 1.37E-03 |
| MGC23270 | -0.06898 | 1.18E-01 | 1.60E-01 |
| MGC23284 | -0.21368 | 9.88E-07 | 2.99E-06 |
| MGC26647 | 0.129139 | 3.33E-03 | 6.15E-03 |
| MGC27382 | -0.26671 | 7.76E-10 | 3.36E-09 |
| MGC2752  | -0.12399 | 4.84E-03 | 8.71E-03 |

|          |          |          |          |
|----------|----------|----------|----------|
| MGC2889  | 0.297029 | 5.98E-12 | 3.24E-11 |
| MGC29506 | -0.04672 | 2.90E-01 | 3.53E-01 |
| MGC34034 | 0.173335 | 7.68E-05 | 1.82E-04 |
| MGC3771  | -0.35899 | 4.14E-17 | 3.75E-16 |
| MGC42105 | -0.03536 | 4.23E-01 | 4.89E-01 |
| MGC4473  | 0.069668 | 1.14E-01 | 1.55E-01 |
| MGC45800 | 0.274052 | 2.52E-10 | 1.16E-09 |
| MGC57346 | 0.266104 | 8.51E-10 | 3.67E-09 |
| MGC70857 | -0.09772 | 2.66E-02 | 4.15E-02 |
| MGC72080 | 0.305816 | 1.30E-12 | 7.56E-12 |
| MGC87042 | 0.525329 | 7.11E-38 | 2.89E-36 |
| MGEA5    | -0.24247 | 2.51E-08 | 9.15E-08 |
| MGLL     | -0.46273 | 1.09E-28 | 2.55E-27 |
| MGMT     | -0.16517 | 1.67E-04 | 3.76E-04 |
| MGP      | -0.52838 | 2.25E-38 | 9.42E-37 |
| MGRN1    | -0.46585 | 4.20E-29 | 1.02E-27 |
| MGST1    | 0.002817 | 9.49E-01 | 9.60E-01 |
| MGST2    | -0.16705 | 1.40E-04 | 3.19E-04 |
| MGST3    | 0.06725  | 1.27E-01 | 1.71E-01 |
| MIA2     | -0.06643 | 1.32E-01 | 1.77E-01 |
| MIA3     | -0.28111 | 8.28E-11 | 3.97E-10 |
| MIAT     | 0.117166 | 7.78E-03 | 1.34E-02 |
| MIA      | -0.1398  | 1.47E-03 | 2.88E-03 |
| MIB1     | 0.174307 | 6.99E-05 | 1.67E-04 |
| MIB2     | -0.24872 | 1.06E-08 | 4.03E-08 |
| MICAL1   | -0.19043 | 1.36E-05 | 3.56E-05 |
| MICAL2   | -0.16414 | 1.83E-04 | 4.11E-04 |
| MICAL3   | 0.265897 | 8.78E-10 | 3.78E-09 |
| MICALCL  | -0.29225 | 1.34E-11 | 6.96E-11 |
| MICALL1  | 0.139451 | 1.51E-03 | 2.95E-03 |
| MICALL2  | -0.1567  | 3.58E-04 | 7.69E-04 |
| MICA     | -0.13541 | 2.07E-03 | 3.96E-03 |
| MICB     | 0.305722 | 1.33E-12 | 7.69E-12 |
| MID1IP1  | -0.26627 | 8.30E-10 | 3.59E-09 |
| MID1     | 0.070243 | 1.11E-01 | 1.52E-01 |
| MID2     | -0.21511 | 8.32E-07 | 2.55E-06 |
| MIDN     | -0.05052 | 2.52E-01 | 3.13E-01 |
| MIER1    | 0.083674 | 5.78E-02 | 8.41E-02 |
| MIER2    | 0.008534 | 8.47E-01 | 8.75E-01 |
| MIER3    | 0.039716 | 3.68E-01 | 4.35E-01 |
| MIF4GD   | 0.010743 | 8.08E-01 | 8.41E-01 |
| MIF      | 0.312565 | 3.91E-13 | 2.40E-12 |
| MIIP     | 0.024501 | 5.79E-01 | 6.39E-01 |
| MIMT1    | -0.02922 | 5.08E-01 | 5.72E-01 |



|          |          |           |           |
|----------|----------|-----------|-----------|
| MINA     | 0.302061 | 2.52E-12  | 1.42E-11  |
| MINK1    | -0.10428 | 1.79E-02  | 2.90E-02  |
| MINPP1   | 0.260868 | 1.85E-09  | 7.69E-09  |
| MIOS     | -0.01358 | 7.59E-01  | 7.99E-01  |
| MIOX     | 0.037173 | 4.00E-01  | 4.66E-01  |
| MIPEP    | -0.15009 | 6.33E-04  | 1.31E-03  |
| MIPOL1   | 0.209743 | 1.57E-06  | 4.65E-06  |
| MIP      | 0.119481 | 6.64E-03  | 1.16E-02  |
| MIR155HG | 0.026771 | 5.44E-01  | 6.07E-01  |
| MIR17HG  | -0.06509 | 1.40E-01  | 1.86E-01  |
| MIS12    | 0.067794 | 1.24E-01  | 1.67E-01  |
| MITD1    | 0.247132 | 1.32E-08  | 4.97E-08  |
| MITF     | -0.0585  | 1.85E-01  | 2.38E-01  |
| MIXL1    | 0.091128 | 3.87E-02  | 5.84E-02  |
| MKI67IP  | 0.418628 | 2.87E-23  | 4.41E-22  |
| MKI67    | 0.772612 | 2.74E-103 | 4.61E-101 |
| MKKS     | 0.117126 | 7.80E-03  | 1.35E-02  |
| MKL1     | -0.01665 | 7.06E-01  | 7.54E-01  |
| MKL2     | -0.23632 | 5.73E-08  | 2.01E-07  |
| MKLN1    | -0.02555 | 5.63E-01  | 6.23E-01  |
| MKNK1    | -0.12257 | 5.35E-03  | 9.55E-03  |
| MKNK2    | -0.20661 | 2.26E-06  | 6.57E-06  |
| MKRN1    | -0.08351 | 5.83E-02  | 8.47E-02  |
| MKRN2    | 0.059705 | 1.76E-01  | 2.28E-01  |
| MKRN3    | 0.247866 | 1.19E-08  | 4.51E-08  |
| MKS1     | -0.01685 | 7.03E-01  | 7.51E-01  |
| MKX      | 0.169289 | 1.13E-04  | 2.62E-04  |
| MLANA    | -0.11852 | 7.09E-03  | 1.24E-02  |
| MLC1     | -0.21781 | 6.01E-07  | 1.87E-06  |
| MLEC     | -0.06366 | 1.49E-01  | 1.97E-01  |
| MLF1IP   | 0.766613 | 9.22E-101 | 1.49E-98  |
| MLF1     | 0.127118 | 3.86E-03  | 7.06E-03  |
| MLF2     | 0.256915 | 3.30E-09  | 1.33E-08  |
| MLH1     | 0.038667 | 3.81E-01  | 4.48E-01  |
| MLH3     | -0.11199 | 1.10E-02  | 1.85E-02  |
| MLKL     | 0.074002 | 9.34E-02  | 1.30E-01  |
| MLL2     | -0.10448 | 1.77E-02  | 2.87E-02  |
| MLL3     | -0.18674 | 2.00E-05  | 5.14E-05  |
| MLL4     | 0.039436 | 3.72E-01  | 4.38E-01  |
| MLL5     | -0.22617 | 2.13E-07  | 7.03E-07  |
| MLLT10   | -0.05097 | 2.48E-01  | 3.09E-01  |
| MLLT11   | 0.433529 | 5.18E-25  | 9.12E-24  |
| MLLT1    | -0.22309 | 3.14E-07  | 1.01E-06  |
| MLLT3    | -0.26939 | 5.17E-10  | 2.29E-09  |

|        |          |          |          |
|--------|----------|----------|----------|
| MLLT4  | -0.17123 | 9.41E-05 | 2.20E-04 |
| MLLT6  | -0.22738 | 1.83E-07 | 6.06E-07 |
| MLL    | -0.11625 | 8.27E-03 | 1.42E-02 |
| MLNR   | 0.085674 | 5.20E-02 | 7.64E-02 |
| MLN    | 0.037556 | 3.95E-01 | 4.62E-01 |
| MLPH   | -0.4332  | 5.67E-25 | 9.94E-24 |
| MLST8  | 0.006363 | 8.85E-01 | 9.07E-01 |
| MLXIPL | -0.09147 | 3.80E-02 | 5.74E-02 |
| MLXIP  | 0.031537 | 4.75E-01 | 5.41E-01 |
| MLX    | 0.117739 | 7.48E-03 | 1.30E-02 |
| MLYCD  | -0.41788 | 3.49E-23 | 5.32E-22 |
| MMAA   | -0.22218 | 3.51E-07 | 1.13E-06 |
| MMAB   | -0.07904 | 7.31E-02 | 1.04E-01 |
| MMACHC | 0.111667 | 1.12E-02 | 1.89E-02 |
| MMADHC | 0.339514 | 2.33E-15 | 1.75E-14 |
| MMD2   | 0.118042 | 7.33E-03 | 1.27E-02 |
| MMD    | 0.519347 | 6.51E-37 | 2.49E-35 |
| MMEL1  | -0.29271 | 1.24E-11 | 6.47E-11 |
| MME    | 0.104934 | 1.72E-02 | 2.79E-02 |
| MMGT1  | 0.028585 | 5.17E-01 | 5.82E-01 |
| MMP10  | 0.1303   | 3.05E-03 | 5.68E-03 |
| MMP11  | 0.18667  | 2.01E-05 | 5.17E-05 |
| MMP12  | 0.462765 | 1.08E-28 | 2.52E-27 |
| MMP13  | 0.046059 | 2.97E-01 | 3.60E-01 |
| MMP14  | 0.318523 | 1.32E-13 | 8.42E-13 |
| MMP15  | -0.35972 | 3.54E-17 | 3.23E-16 |
| MMP16  | -0.05682 | 1.98E-01 | 2.53E-01 |
| MMP17  | 0.039532 | 3.71E-01 | 4.37E-01 |
| MMP19  | -0.22104 | 4.05E-07 | 1.29E-06 |
| MMP1   | 0.248932 | 1.03E-08 | 3.92E-08 |
| MMP20  | 0.134234 | 2.27E-03 | 4.30E-03 |
| MMP21  | -0.24814 | 1.15E-08 | 4.34E-08 |
| MMP23A | -0.14639 | 8.62E-04 | 1.75E-03 |
| MMP23B | -0.301   | 3.02E-12 | 1.69E-11 |
| MMP24  | -0.36744 | 6.60E-18 | 6.35E-17 |
| MMP25  | -0.00144 | 9.74E-01 | 9.80E-01 |
| MMP26  | 0.127748 | 3.69E-03 | 6.76E-03 |
| MMP27  | -0.02929 | 5.07E-01 | 5.71E-01 |
| MMP28  | -0.3242  | 4.55E-14 | 3.04E-13 |
| MMP2   | -0.07728 | 7.98E-02 | 1.13E-01 |
| MMP3   | 0.194785 | 8.49E-06 | 2.30E-05 |
| MMP7   | -0.04393 | 3.20E-01 | 3.84E-01 |
| MMP8   | 0.117019 | 7.85E-03 | 1.36E-02 |
| MMP9   | 0.215371 | 8.07E-07 | 2.47E-06 |

|         |          |          |          |
|---------|----------|----------|----------|
| MMRN1   | -0.34584 | 6.48E-16 | 5.19E-15 |
| MMRN2   | -0.26991 | 4.78E-10 | 2.12E-09 |
| MMS19   | -0.0652  | 1.40E-01 | 1.85E-01 |
| MN1     | 0.02118  | 6.32E-01 | 6.87E-01 |
| MNAT1   | 0.219159 | 5.10E-07 | 1.60E-06 |
| MND1    | 0.756218 | 1.47E-96 | 2.25E-94 |
| MNDA    | -0.13714 | 1.81E-03 | 3.50E-03 |
| MNS1    | 0.209509 | 1.62E-06 | 4.77E-06 |
| MNT     | -0.17393 | 7.25E-05 | 1.73E-04 |
| MX1     | -0.06964 | 1.14E-01 | 1.55E-01 |
| MOAP1   | -0.43592 | 2.67E-25 | 4.83E-24 |
| MOB2    | -0.40489 | 9.75E-22 | 1.31E-20 |
| MOBKL1A | -0.14113 | 1.32E-03 | 2.61E-03 |
| MOBKL1B | 0.489602 | 2.11E-32 | 6.32E-31 |
| MOBKL2A | -0.04233 | 3.38E-01 | 4.03E-01 |
| MOBKL2B | -0.02003 | 6.50E-01 | 7.04E-01 |
| MOBKL2C | -0.29014 | 1.90E-11 | 9.73E-11 |
| MOBKL3  | 0.294237 | 9.60E-12 | 5.07E-11 |
| MOBP    | -0.08974 | 4.18E-02 | 6.26E-02 |
| MOCOS   | 0.341063 | 1.71E-15 | 1.30E-14 |
| MOCS1   | -0.43623 | 2.45E-25 | 4.44E-24 |
| MOCS2   | -0.12767 | 3.71E-03 | 6.80E-03 |
| MOCS3   | 0.183778 | 2.71E-05 | 6.84E-05 |
| MOGAT1  | 0.006067 | 8.91E-01 | 9.11E-01 |
| MOGAT2  | -0.13709 | 1.82E-03 | 3.51E-03 |
| MOGAT3  | 0.096814 | 2.80E-02 | 4.35E-02 |
| MOGS    | 0.156731 | 3.57E-04 | 7.67E-04 |
| MOG     | 0.036109 | 4.14E-01 | 4.80E-01 |
| MON1A   | -0.22348 | 2.99E-07 | 9.69E-07 |
| MON1B   | -0.08904 | 4.34E-02 | 6.48E-02 |
| MON2    | -0.03115 | 4.81E-01 | 5.46E-01 |
| MORC1   | 0.097617 | 2.67E-02 | 4.17E-02 |
| MORC2   | 0.08259  | 6.11E-02 | 8.85E-02 |
| MORC3   | -0.1693  | 1.13E-04 | 2.62E-04 |
| MORC4   | 0.215112 | 8.32E-07 | 2.55E-06 |
| MORF4L1 | 0.04832  | 2.74E-01 | 3.36E-01 |
| MORF4L2 | 0.343727 | 9.96E-16 | 7.79E-15 |
| MORF4   | 0.066786 | 1.30E-01 | 1.74E-01 |
| MORN1   | -0.25952 | 2.26E-09 | 9.27E-09 |
| MORN2   | 0.076404 | 8.32E-02 | 1.17E-01 |
| MORN3   | -0.06869 | 1.19E-01 | 1.61E-01 |
| MORN4   | -0.20293 | 3.44E-06 | 9.80E-06 |
| MORN5   | -0.22073 | 4.20E-07 | 1.34E-06 |
| MOSC1   | -0.22161 | 3.77E-07 | 1.21E-06 |

|           |          |          |          |
|-----------|----------|----------|----------|
| MOSC2     | -0.45899 | 3.38E-28 | 7.65E-27 |
| MOSPD1    | -0.03835 | 3.85E-01 | 4.52E-01 |
| MOSPD2    | 0.029489 | 5.04E-01 | 5.69E-01 |
| MOSPD3    | -0.10362 | 1.87E-02 | 3.01E-02 |
| MOS       | 0.137078 | 1.82E-03 | 3.51E-03 |
| MOV10L1   | 0.061147 | 1.66E-01 | 2.16E-01 |
| MOV10     | 0.208437 | 1.83E-06 | 5.38E-06 |
| MOXD1     | -0.16999 | 1.06E-04 | 2.46E-04 |
| MPDU1     | -0.10329 | 1.90E-02 | 3.06E-02 |
| MPDZ      | -0.09386 | 3.32E-02 | 5.08E-02 |
| MPEG1     | -0.14027 | 1.42E-03 | 2.78E-03 |
| MPG       | -0.15752 | 3.33E-04 | 7.18E-04 |
| MPHOSPH10 | 0.360069 | 3.28E-17 | 3.01E-16 |
| MPHOSPH6  | 0.330865 | 1.27E-14 | 8.95E-14 |
| MPHOSPH8  | -0.29787 | 5.18E-12 | 2.82E-11 |
| MPHOSPH9  | 0.529389 | 1.54E-38 | 6.51E-37 |
| MPI       | -0.10539 | 1.67E-02 | 2.72E-02 |
| MPL       | -0.35234 | 1.69E-16 | 1.43E-15 |
| MPND      | -0.24383 | 2.09E-08 | 7.67E-08 |
| MPO       | 0.09024  | 4.07E-02 | 6.11E-02 |
| MPP1      | 0.094708 | 3.16E-02 | 4.86E-02 |
| MPP2      | 0.31021  | 5.97E-13 | 3.59E-12 |
| MPP3      | -0.05122 | 2.46E-01 | 3.06E-01 |
| MPP4      | 0.055459 | 2.09E-01 | 2.65E-01 |
| MPP5      | -0.03006 | 4.96E-01 | 5.61E-01 |
| MPP6      | 0.415474 | 6.54E-23 | 9.69E-22 |
| MPP7      | -0.25757 | 3.01E-09 | 1.22E-08 |
| MPPE1     | -0.19617 | 7.30E-06 | 1.99E-05 |
| MPPED1    | -0.02521 | 5.68E-01 | 6.28E-01 |
| MPPED2    | -0.18591 | 2.18E-05 | 5.57E-05 |
| MPRIP     | -0.21194 | 1.21E-06 | 3.64E-06 |
| MPST      | -0.22937 | 1.42E-07 | 4.77E-07 |
| MPV17L2   | 0.069544 | 1.15E-01 | 1.56E-01 |
| MPV17L    | -0.1883  | 1.70E-05 | 4.41E-05 |
| MPV17     | -0.00984 | 8.24E-01 | 8.55E-01 |
| MPZL1     | -0.06452 | 1.44E-01 | 1.90E-01 |
| MPZL2     | -0.29587 | 7.28E-12 | 3.89E-11 |
| MPZL3     | 0.028208 | 5.23E-01 | 5.87E-01 |
| MPZ       | -0.01798 | 6.84E-01 | 7.34E-01 |
| MR1       | -0.27674 | 1.66E-10 | 7.72E-10 |
| MRAP2     | -0.04376 | 3.22E-01 | 3.86E-01 |
| MRAP      | -0.01447 | 7.43E-01 | 7.86E-01 |
| MRAS      | -0.05199 | 2.39E-01 | 2.98E-01 |
| MRC1      | -0.17203 | 8.72E-05 | 2.05E-04 |

|          |          |          |          |
|----------|----------|----------|----------|
| MRC2     | -0.17692 | 5.41E-05 | 1.31E-04 |
| MRE11A   | 0.219354 | 4.98E-07 | 1.57E-06 |
| MREG     | -0.07691 | 8.12E-02 | 1.14E-01 |
| MRFAP1L1 | -0.15252 | 5.14E-04 | 1.08E-03 |
| MRFAP1   | 0.040965 | 3.54E-01 | 4.19E-01 |
| MRGPRD   | 0.064728 | 1.42E-01 | 1.89E-01 |
| MRGPRE   | -0.04643 | 2.93E-01 | 3.56E-01 |
| MRGPRF   | -0.10956 | 1.29E-02 | 2.14E-02 |
| MRGPRX1  | -0.04552 | 3.02E-01 | 3.66E-01 |
| MRGPRX2  | -0.15119 | 5.76E-04 | 1.20E-03 |
| MRGPRX3  | 0.17895  | 4.42E-05 | 1.08E-04 |
| MRGPRX4  | 0.134276 | 2.26E-03 | 4.29E-03 |
| MRI1     | -0.1985  | 5.65E-06 | 1.56E-05 |
| MRM1     | 0.060038 | 1.74E-01 | 2.25E-01 |
| MRO      | 0.176732 | 5.51E-05 | 1.33E-04 |
| MRP63    | 0.00456  | 9.18E-01 | 9.34E-01 |
| MRPL10   | 0.236026 | 5.96E-08 | 2.08E-07 |
| MRPL11   | 0.499469 | 7.55E-34 | 2.44E-32 |
| MRPL12   | 0.425742 | 4.33E-24 | 7.14E-23 |
| MRPL13   | 0.400116 | 3.20E-21 | 4.15E-20 |
| MRPL14   | -0.00738 | 8.67E-01 | 8.92E-01 |
| MRPL15   | 0.42857  | 2.01E-24 | 3.41E-23 |
| MRPL16   | 0.107604 | 1.46E-02 | 2.40E-02 |
| MRPL17   | 0.291054 | 1.64E-11 | 8.42E-11 |
| MRPL18   | 0.175734 | 6.08E-05 | 1.46E-04 |
| MRPL19   | 0.423747 | 7.39E-24 | 1.20E-22 |
| MRPL1    | 0.254442 | 4.72E-09 | 1.87E-08 |
| MRPL20   | 0.048249 | 2.74E-01 | 3.36E-01 |
| MRPL21   | 0.395644 | 9.58E-21 | 1.20E-19 |
| MRPL22   | 0.185273 | 2.33E-05 | 5.93E-05 |
| MRPL23   | -0.12147 | 5.78E-03 | 1.03E-02 |
| MRPL24   | 0.049713 | 2.60E-01 | 3.21E-01 |
| MRPL27   | 0.229234 | 1.44E-07 | 4.85E-07 |
| MRPL28   | 0.111837 | 1.11E-02 | 1.87E-02 |
| MRPL2    | 0.237388 | 4.97E-08 | 1.75E-07 |
| MRPL30   | 0.361565 | 2.38E-17 | 2.20E-16 |
| MRPL32   | 0.220669 | 4.23E-07 | 1.35E-06 |
| MRPL33   | 0.21703  | 6.61E-07 | 2.05E-06 |
| MRPL34   | 0.059419 | 1.78E-01 | 2.30E-01 |
| MRPL35   | 0.428529 | 2.04E-24 | 3.45E-23 |
| MRPL36   | 0.281896 | 7.30E-11 | 3.52E-10 |
| MRPL37   | 0.491434 | 1.15E-32 | 3.47E-31 |
| MRPL38   | 0.095746 | 2.98E-02 | 4.60E-02 |
| MRPL39   | 0.244658 | 1.86E-08 | 6.88E-08 |

|          |          |          |          |
|----------|----------|----------|----------|
| MRPL3    | 0.511029 | 1.32E-35 | 4.70E-34 |
| MRPL40   | 0.073734 | 9.46E-02 | 1.31E-01 |
| MRPL41   | 0.032015 | 4.68E-01 | 5.34E-01 |
| MRPL42P5 | -0.18351 | 2.79E-05 | 7.02E-05 |
| MRPL42   | 0.484367 | 1.19E-31 | 3.38E-30 |
| MRPL43   | -0.05481 | 2.14E-01 | 2.71E-01 |
| MRPL44   | 0.303353 | 2.01E-12 | 1.15E-11 |
| MRPL45   | 0.303319 | 2.02E-12 | 1.16E-11 |
| MRPL46   | 0.133467 | 2.40E-03 | 4.54E-03 |
| MRPL47   | 0.517188 | 1.43E-36 | 5.41E-35 |
| MRPL48   | 0.228161 | 1.66E-07 | 5.51E-07 |
| MRPL49   | 0.113707 | 9.81E-03 | 1.67E-02 |
| MRPL4    | 0.147362 | 7.95E-04 | 1.62E-03 |
| MRPL50   | 0.181307 | 3.49E-05 | 8.67E-05 |
| MRPL51   | 0.385157 | 1.17E-19 | 1.32E-18 |
| MRPL52   | 0.319901 | 1.02E-13 | 6.59E-13 |
| MRPL53   | 0.119236 | 6.75E-03 | 1.18E-02 |
| MRPL54   | -0.09586 | 2.96E-02 | 4.58E-02 |
| MRPL55   | -0.04942 | 2.63E-01 | 3.24E-01 |
| MRPL9    | 0.356108 | 7.65E-17 | 6.70E-16 |
| MRPS10   | 0.430975 | 1.05E-24 | 1.81E-23 |
| MRPS11   | 0.272219 | 3.35E-10 | 1.52E-09 |
| MRPS12   | 0.353236 | 1.40E-16 | 1.20E-15 |
| MRPS14   | 0.123545 | 4.99E-03 | 8.97E-03 |
| MRPS15   | 0.279824 | 1.02E-10 | 4.83E-10 |
| MRPS16   | 0.302461 | 2.35E-12 | 1.33E-11 |
| MRPS17   | 0.41499  | 7.42E-23 | 1.09E-21 |
| MRPS18A  | 0.05559  | 2.08E-01 | 2.64E-01 |
| MRPS18B  | -0.04884 | 2.69E-01 | 3.30E-01 |
| MRPS18C  | 0.246962 | 1.35E-08 | 5.08E-08 |
| MRPS21   | -0.00095 | 9.83E-01 | 9.87E-01 |
| MRPS22   | 0.43934  | 1.03E-25 | 1.92E-24 |
| MRPS23   | 0.279105 | 1.14E-10 | 5.39E-10 |
| MRPS24   | 0.290777 | 1.71E-11 | 8.80E-11 |
| MRPS25   | -0.41556 | 6.41E-23 | 9.50E-22 |
| MRPS26   | -0.02976 | 5.00E-01 | 5.65E-01 |
| MRPS27   | -0.01001 | 8.21E-01 | 8.52E-01 |
| MRPS28   | 0.120397 | 6.23E-03 | 1.10E-02 |
| MRPS2    | 0.138739 | 1.60E-03 | 3.11E-03 |
| MRPS30   | 0.485486 | 8.23E-32 | 2.37E-30 |
| MRPS31   | -0.04982 | 2.59E-01 | 3.20E-01 |
| MRPS33   | 0.243814 | 2.09E-08 | 7.67E-08 |
| MRPS34   | 0.039887 | 3.66E-01 | 4.33E-01 |
| MRPS35   | 0.495068 | 3.38E-33 | 1.05E-31 |

|        |          |          |          |
|--------|----------|----------|----------|
| MRPS36 | -0.19765 | 6.21E-06 | 1.71E-05 |
| MRPS5  | 0.2613   | 1.74E-09 | 7.24E-09 |
| MRPS6  | 0.019136 | 6.65E-01 | 7.17E-01 |
| MRPS7  | 0.356364 | 7.24E-17 | 6.37E-16 |
| MRPS9  | 0.178454 | 4.65E-05 | 1.14E-04 |
| MRRF   | 0.039803 | 3.67E-01 | 4.34E-01 |
| MRS2P2 | -0.01464 | 7.40E-01 | 7.84E-01 |
| MRS2   | 0.02549  | 5.64E-01 | 6.24E-01 |
| MRT04  | 0.417021 | 4.37E-23 | 6.60E-22 |
| MRVI1  | -0.25542 | 4.10E-09 | 1.63E-08 |
| MS4A10 | -0.13585 | 2.00E-03 | 3.84E-03 |
| MS4A12 | 0.016976 | 7.01E-01 | 7.49E-01 |
| MS4A13 | 0.090349 | 4.04E-02 | 6.08E-02 |
| MS4A14 | -0.1584  | 3.08E-04 | 6.68E-04 |
| MS4A15 | -0.42692 | 3.15E-24 | 5.26E-23 |
| MS4A1  | -0.19508 | 8.22E-06 | 2.23E-05 |
| MS4A2  | -0.40023 | 3.11E-21 | 4.04E-20 |
| MS4A3  | -0.05663 | 1.99E-01 | 2.54E-01 |
| MS4A4A | -0.00661 | 8.81E-01 | 9.03E-01 |
| MS4A5  | 0.066596 | 1.31E-01 | 1.76E-01 |
| MS4A6A | -0.05089 | 2.49E-01 | 3.09E-01 |
| MS4A6E | -0.10547 | 1.67E-02 | 2.71E-02 |
| MS4A7  | -0.14149 | 1.28E-03 | 2.54E-03 |
| MS4A8B | -0.31673 | 1.83E-13 | 1.16E-12 |
| MSC    | 0.14019  | 1.43E-03 | 2.80E-03 |
| MSGN1  | 0.008434 | 8.49E-01 | 8.76E-01 |
| MSH2   | 0.597319 | 4.09E-51 | 2.84E-49 |
| MSH3   | 0.073111 | 9.74E-02 | 1.34E-01 |
| MSH4   | 0.113961 | 9.64E-03 | 1.64E-02 |
| MSH5   | 0.038638 | 3.82E-01 | 4.48E-01 |
| MSH6   | 0.605617 | 7.30E-53 | 5.29E-51 |
| MSI1   | 0.157374 | 3.37E-04 | 7.27E-04 |
| MSI2   | 0.192845 | 1.05E-05 | 2.79E-05 |
| MSL1   | 0.199431 | 5.10E-06 | 1.42E-05 |
| MSL2   | -0.04635 | 2.94E-01 | 3.57E-01 |
| MSL3L2 | 0.195725 | 7.67E-06 | 2.08E-05 |
| MSL3   | 0.009878 | 8.23E-01 | 8.54E-01 |
| MSLNL  | -0.2404  | 3.32E-08 | 1.19E-07 |
| MSLN   | -0.35489 | 9.89E-17 | 8.57E-16 |
| MSMB   | -0.06347 | 1.50E-01 | 1.98E-01 |
| MSMP   | -0.00505 | 9.09E-01 | 9.27E-01 |
| MSN    | -0.25938 | 2.31E-09 | 9.45E-09 |
| MSR1   | 0.006625 | 8.81E-01 | 9.03E-01 |
| MSRA   | -0.37502 | 1.21E-18 | 1.25E-17 |

|         |          |          |          |
|---------|----------|----------|----------|
| MSRB2   | -0.06497 | 1.41E-01 | 1.87E-01 |
| MSRB3   | -0.22601 | 2.18E-07 | 7.16E-07 |
| MST1P2  | -0.42048 | 1.76E-23 | 2.75E-22 |
| MST1P9  | -0.47836 | 8.28E-31 | 2.26E-29 |
| MST1R   | -0.10178 | 2.09E-02 | 3.33E-02 |
| MST1    | -0.20611 | 2.40E-06 | 6.92E-06 |
| MST4    | 0.176681 | 5.54E-05 | 1.34E-04 |
| MSTN    | -0.21893 | 5.24E-07 | 1.65E-06 |
| MSTO1   | 0.035844 | 4.17E-01 | 4.83E-01 |
| MSTO2P  | -0.06614 | 1.34E-01 | 1.79E-01 |
| MSX1    | 0.054918 | 2.13E-01 | 2.70E-01 |
| MSX2P1  | -0.10582 | 1.63E-02 | 2.66E-02 |
| MSX2    | 0.140851 | 1.35E-03 | 2.66E-03 |
| MT1A    | 0.150562 | 6.08E-04 | 1.26E-03 |
| MT1B    | 0.079382 | 7.19E-02 | 1.03E-01 |
| MT1DP   | 0.137053 | 1.82E-03 | 3.52E-03 |
| MT1E    | -0.03034 | 4.92E-01 | 5.57E-01 |
| MT1F    | 0.07178  | 1.04E-01 | 1.42E-01 |
| MT1G    | 0.327554 | 2.41E-14 | 1.65E-13 |
| MT1H    | 0.445762 | 1.65E-26 | 3.27E-25 |
| MT1IP   | -0.13459 | 2.21E-03 | 4.19E-03 |
| MT1L    | 0.130935 | 2.91E-03 | 5.43E-03 |
| MT1M    | -0.03319 | 4.52E-01 | 5.19E-01 |
| MT1X    | 0.25386  | 5.13E-09 | 2.02E-08 |
| MT2A    | 0.266878 | 7.57E-10 | 3.29E-09 |
| MT3     | 0.055992 | 2.05E-01 | 2.60E-01 |
| MTA1    | 0.103977 | 1.83E-02 | 2.95E-02 |
| MTA2    | 0.421845 | 1.23E-23 | 1.94E-22 |
| MTA3    | 0.261846 | 1.61E-09 | 6.70E-09 |
| MTAP    | 0.064327 | 1.45E-01 | 1.92E-01 |
| MTBP    | 0.617187 | 2.18E-55 | 1.66E-53 |
| MTCH1   | 0.078285 | 7.59E-02 | 1.08E-01 |
| MTCH2   | 0.425628 | 4.46E-24 | 7.35E-23 |
| MTCP1NB | -0.00482 | 9.13E-01 | 9.30E-01 |
| MTCP1   | -0.0199  | 6.52E-01 | 7.06E-01 |
| MTDH    | 0.195522 | 7.84E-06 | 2.13E-05 |
| MTERFD1 | 0.33085  | 1.28E-14 | 8.97E-14 |
| MTERFD2 | -0.21552 | 7.93E-07 | 2.43E-06 |
| MTERFD3 | -0.13888 | 1.58E-03 | 3.08E-03 |
| MTERF   | 0.298302 | 4.81E-12 | 2.63E-11 |
| MTF1    | -0.06097 | 1.67E-01 | 2.18E-01 |
| MTF2    | 0.291337 | 1.56E-11 | 8.05E-11 |
| MTFMT   | -0.12076 | 6.07E-03 | 1.07E-02 |
| MTFR1   | 0.331462 | 1.13E-14 | 8.02E-14 |



|         |          |          |          |
|---------|----------|----------|----------|
| MTG1    | 0.083807 | 5.74E-02 | 8.35E-02 |
| MTHFD1L | 0.468896 | 1.64E-29 | 4.08E-28 |
| MTHFD1  | 0.48052  | 4.14E-31 | 1.14E-29 |
| MTHFD2L | 0.042478 | 3.36E-01 | 4.01E-01 |
| MTHFD2  | 0.728044 | 3.68E-86 | 4.84E-84 |
| MTHFR   | -0.3917  | 2.48E-20 | 3.00E-19 |
| MTHFSD  | -0.24323 | 2.26E-08 | 8.28E-08 |
| MTHFS   | 0.062424 | 1.57E-01 | 2.06E-01 |
| MTIF2   | 0.525468 | 6.74E-38 | 2.75E-36 |
| MTIF3   | -0.18645 | 2.06E-05 | 5.28E-05 |
| MTL5    | 0.544709 | 3.97E-41 | 1.92E-39 |
| MTM1    | -0.22498 | 2.48E-07 | 8.10E-07 |
| MTMR10  | -0.44218 | 4.59E-26 | 8.88E-25 |
| MTMR11  | 0.142986 | 1.14E-03 | 2.27E-03 |
| MTMR12  | -0.22765 | 1.77E-07 | 5.87E-07 |
| MTMR14  | -0.09469 | 3.17E-02 | 4.87E-02 |
| MTMR15  | -0.06147 | 1.64E-01 | 2.14E-01 |
| MTMR1   | 0.007923 | 8.58E-01 | 8.84E-01 |
| MTMR2   | 0.29474  | 8.81E-12 | 4.67E-11 |
| MTMR3   | -0.2097  | 1.58E-06 | 4.68E-06 |
| MTMR4   | 0.073295 | 9.66E-02 | 1.34E-01 |
| MTMR6   | -0.08811 | 4.57E-02 | 6.79E-02 |
| MTMR7   | 0.028386 | 5.20E-01 | 5.84E-01 |
| MTMR8   | -0.05103 | 2.48E-01 | 3.08E-01 |
| MTMR9L  | -0.1493  | 6.76E-04 | 1.40E-03 |
| MTMR9   | -0.09414 | 3.27E-02 | 5.01E-02 |
| MTNR1A  | -0.12062 | 6.13E-03 | 1.08E-02 |
| MTNR1B  | 0.142505 | 1.18E-03 | 2.35E-03 |
| MTO1    | 0.077845 | 7.76E-02 | 1.10E-01 |
| MTOR    | 0.125237 | 4.42E-03 | 8.01E-03 |
| MTP18   | 0.323629 | 5.07E-14 | 3.38E-13 |
| MTPAP   | 0.303157 | 2.08E-12 | 1.19E-11 |
| MTRF1L  | 0.295959 | 7.17E-12 | 3.84E-11 |
| MTRF1   | -0.02043 | 6.44E-01 | 6.98E-01 |
| MTRR    | -0.15314 | 4.88E-04 | 1.02E-03 |
| MTR     | -0.3607  | 2.87E-17 | 2.63E-16 |
| MTSS1L  | -0.16114 | 2.41E-04 | 5.32E-04 |
| MTSS1   | -0.24417 | 1.99E-08 | 7.33E-08 |
| MTPP    | -0.11141 | 1.14E-02 | 1.92E-02 |
| MTUS1   | -0.35774 | 5.40E-17 | 4.82E-16 |
| MTUS2   | -0.10989 | 1.26E-02 | 2.10E-02 |
| MTVR2   | -0.08111 | 6.59E-02 | 9.49E-02 |
| MTX1    | 0.256673 | 3.42E-09 | 1.37E-08 |
| MTX2    | 0.167556 | 1.33E-04 | 3.05E-04 |

|         |          |           |           |
|---------|----------|-----------|-----------|
| MTX3    | -0.14419 | 1.03E-03  | 2.07E-03  |
| MUC12   | 0.050306 | 2.54E-01  | 3.15E-01  |
| MUC13   | 0.117335 | 7.69E-03  | 1.33E-02  |
| MUC15   | -0.1692  | 1.14E-04  | 2.64E-04  |
| MUC16   | 0.222658 | 3.31E-07  | 1.07E-06  |
| MUC17   | -0.03687 | 4.04E-01  | 4.70E-01  |
| MUC1    | -0.47289 | 4.70E-30  | 1.21E-28  |
| MUC20   | -0.05707 | 1.96E-01  | 2.50E-01  |
| MUC21   | -0.30745 | 9.77E-13  | 5.75E-12  |
| MUC2    | 0.103683 | 1.86E-02  | 3.00E-02  |
| MUC4    | -0.1033  | 1.90E-02  | 3.06E-02  |
| MUC5B   | -0.08355 | 5.81E-02  | 8.46E-02  |
| MUC6    | -0.12816 | 3.58E-03  | 6.57E-03  |
| MUC7    | -0.02096 | 6.35E-01  | 6.90E-01  |
| MUCL1   | 0.087512 | 4.72E-02  | 6.99E-02  |
| MUDENG  | 0.139603 | 1.49E-03  | 2.92E-03  |
| MUL1    | -0.02902 | 5.11E-01  | 5.75E-01  |
| MUM1L1  | -0.14608 | 8.84E-04  | 1.79E-03  |
| MUM1    | -0.21182 | 1.23E-06  | 3.69E-06  |
| MURC    | 0.296973 | 6.04E-12  | 3.26E-11  |
| MUS81   | 0.141793 | 1.25E-03  | 2.48E-03  |
| MUSK    | -0.4085  | 3.93E-22  | 5.47E-21  |
| MUSTN1  | -0.47356 | 3.81E-30  | 9.87E-29  |
| MUTED   | 0.108629 | 1.36E-02  | 2.26E-02  |
| MUTYH   | 0.07328  | 9.67E-02  | 1.34E-01  |
| MUT     | -0.1074  | 1.48E-02  | 2.43E-02  |
| MVD     | -0.04194 | 3.42E-01  | 4.08E-01  |
| MVK     | -0.07246 | 1.00E-01  | 1.38E-01  |
| MVP     | -0.39371 | 1.53E-20  | 1.88E-19  |
| MX1     | 0.069073 | 1.17E-01  | 1.59E-01  |
| MX2     | -0.08683 | 4.89E-02  | 7.22E-02  |
| MXD1    | 0.298502 | 4.65E-12  | 2.55E-11  |
| MXD3    | 0.301903 | 2.59E-12  | 1.46E-11  |
| MXD4    | -0.47978 | 5.26E-31  | 1.44E-29  |
| MXI1    | -0.10042 | 2.27E-02  | 3.59E-02  |
| MXRA5   | 0.184642 | 2.48E-05  | 6.30E-05  |
| MXRA7   | 0.02733  | 5.36E-01  | 5.99E-01  |
| MXRA8   | -0.16112 | 2.41E-04  | 5.33E-04  |
| MYADML2 | 0.177669 | 5.03E-05  | 1.22E-04  |
| MYADML  | 0.03764  | 3.94E-01  | 4.61E-01  |
| MYADM   | -0.08394 | 5.69E-02  | 8.30E-02  |
| MYBBP1A | 0.005365 | 9.03E-01  | 9.22E-01  |
| MYBL1   | 0.481701 | 2.83E-31  | 7.88E-30  |
| MYBL2   | 0.835285 | 2.27E-135 | 7.21E-133 |

|         |          |          |          |
|---------|----------|----------|----------|
| MYBPC1  | -0.0612  | 1.65E-01 | 2.16E-01 |
| MYBPC2  | -0.05903 | 1.81E-01 | 2.34E-01 |
| MYBPC3  | 0.001582 | 9.71E-01 | 9.78E-01 |
| MYBPHL  | -0.3509  | 2.28E-16 | 1.91E-15 |
| MYBPH   | -0.06926 | 1.16E-01 | 1.58E-01 |
| MYB     | 0.203999 | 3.05E-06 | 8.72E-06 |
| MYCBP2  | -0.17234 | 8.46E-05 | 1.99E-04 |
| MYCBPAP | -0.17058 | 1.00E-04 | 2.34E-04 |
| MYCBP   | 0.073744 | 9.46E-02 | 1.31E-01 |
| MYCL1   | -0.0842  | 5.62E-02 | 8.20E-02 |
| MYCNOS  | 0.154269 | 4.42E-04 | 9.36E-04 |
| MYCN    | 0.063247 | 1.52E-01 | 2.00E-01 |
| MYCT1   | -0.28356 | 5.59E-11 | 2.72E-10 |
| MYC     | 0.18424  | 2.59E-05 | 6.54E-05 |
| MYD88   | -0.01374 | 7.56E-01 | 7.97E-01 |
| MYEF2   | -0.10467 | 1.75E-02 | 2.84E-02 |
| MYEOV2  | 0.11546  | 8.73E-03 | 1.49E-02 |
| MYEOV   | 0.291243 | 1.58E-11 | 8.16E-11 |
| MYF5    | 0.013219 | 7.65E-01 | 8.04E-01 |
| MYF6    | 0.132965 | 2.50E-03 | 4.71E-03 |
| MYH10   | -0.25505 | 4.32E-09 | 1.72E-08 |
| MYH11   | -0.44699 | 1.16E-26 | 2.32E-25 |
| MYH13   | 0.088639 | 4.44E-02 | 6.62E-02 |
| MYH14   | -0.25844 | 2.65E-09 | 1.08E-08 |
| MYH15   | 0.015764 | 7.21E-01 | 7.67E-01 |
| MYH16   | 0.34583  | 6.49E-16 | 5.20E-15 |
| MYH1    | -0.39461 | 1.23E-20 | 1.52E-19 |
| MYH2    | -0.38158 | 2.70E-19 | 2.96E-18 |
| MYH3    | -0.15116 | 5.78E-04 | 1.20E-03 |
| MYH4    | -0.09667 | 2.83E-02 | 4.39E-02 |
| MYH6    | 0.182681 | 3.04E-05 | 7.60E-05 |
| MYH7B   | -0.24273 | 2.42E-08 | 8.84E-08 |
| MYH7    | 0.063111 | 1.53E-01 | 2.01E-01 |
| MYH8    | -0.06385 | 1.48E-01 | 1.95E-01 |
| MYH9    | -0.04005 | 3.64E-01 | 4.31E-01 |
| MYL10   | 0.049848 | 2.59E-01 | 3.20E-01 |
| MYL12A  | -0.0366  | 4.07E-01 | 4.74E-01 |
| MYL12B  | -0.0002  | 9.96E-01 | 9.97E-01 |
| MYL1    | 0.032243 | 4.65E-01 | 5.31E-01 |
| MYL2    | -0.01972 | 6.55E-01 | 7.08E-01 |
| MYL3    | -0.33394 | 7.00E-15 | 5.05E-14 |
| MYL4    | -0.00807 | 8.55E-01 | 8.82E-01 |
| MYL5    | -0.25667 | 3.42E-09 | 1.37E-08 |
| MYL6B   | 0.411993 | 1.61E-22 | 2.31E-21 |

|        |          |          |          |
|--------|----------|----------|----------|
| MYL6   | 0.165112 | 1.67E-04 | 3.77E-04 |
| MYL7   | 0.094529 | 3.20E-02 | 4.91E-02 |
| MYL9   | -0.15619 | 3.74E-04 | 8.01E-04 |
| MYLIP  | -0.40654 | 6.45E-22 | 8.82E-21 |
| MYLK2  | 0.337524 | 3.46E-15 | 2.56E-14 |
| MYLK3  | -0.19564 | 7.74E-06 | 2.10E-05 |
| MYLK4  | -0.33244 | 9.39E-15 | 6.68E-14 |
| MYLK   | -0.17295 | 7.98E-05 | 1.88E-04 |
| MYLPF  | -0.20128 | 4.15E-06 | 1.17E-05 |
| MYNN   | 0.264805 | 1.03E-09 | 4.41E-09 |
| MYO10  | -0.01197 | 7.86E-01 | 8.23E-01 |
| MYO15A | -0.30885 | 7.62E-13 | 4.53E-12 |
| MYO15B | -0.25446 | 4.71E-09 | 1.86E-08 |
| MYO16  | -0.02449 | 5.79E-01 | 6.39E-01 |
| MYO18A | -0.12761 | 3.72E-03 | 6.82E-03 |
| MYO18B | 0.145813 | 9.04E-04 | 1.83E-03 |
| MYO19  | 0.537795 | 6.08E-40 | 2.80E-38 |
| MYO1A  | -0.05036 | 2.54E-01 | 3.15E-01 |
| MYO1B  | -0.08527 | 5.31E-02 | 7.79E-02 |
| MYO1C  | -0.25071 | 8.02E-09 | 3.09E-08 |
| MYO1D  | -0.21173 | 1.25E-06 | 3.73E-06 |
| MYO1E  | 0.239603 | 3.70E-08 | 1.32E-07 |
| MYO1F  | -0.14024 | 1.42E-03 | 2.79E-03 |
| MYO1G  | -0.06803 | 1.23E-01 | 1.66E-01 |
| MYO1H  | -0.14979 | 6.49E-04 | 1.34E-03 |
| MYO3A  | 0.039204 | 3.75E-01 | 4.41E-01 |
| MYO3B  | 0.196612 | 6.96E-06 | 1.90E-05 |
| MYO5A  | 0.060749 | 1.69E-01 | 2.19E-01 |
| MYO5B  | 0.064758 | 1.42E-01 | 1.89E-01 |
| MYO5C  | -0.33106 | 1.23E-14 | 8.64E-14 |
| MYO6   | -0.16957 | 1.10E-04 | 2.56E-04 |
| MYO7A  | 0.227949 | 1.70E-07 | 5.66E-07 |
| MYO7B  | -0.08618 | 5.06E-02 | 7.46E-02 |
| MYO9A  | -0.26288 | 1.38E-09 | 5.80E-09 |
| MYO9B  | -0.06416 | 1.46E-01 | 1.93E-01 |
| MYOCD  | -0.45943 | 2.96E-28 | 6.71E-27 |
| MYOC   | -0.48184 | 2.70E-31 | 7.53E-30 |
| MYOD1  | 0.17334  | 7.68E-05 | 1.82E-04 |
| MYOF   | -0.1382  | 1.67E-03 | 3.24E-03 |
| MYOG   | -0.06591 | 1.35E-01 | 1.80E-01 |
| MYOM1  | -0.18419 | 2.60E-05 | 6.58E-05 |
| MYOM2  | -0.36032 | 3.11E-17 | 2.85E-16 |
| MYOM3  | 0.100066 | 2.31E-02 | 3.66E-02 |
| MYOT   | -0.05962 | 1.77E-01 | 2.29E-01 |

|          |          |          |          |
|----------|----------|----------|----------|
| MYOZ1    | -0.41297 | 1.25E-22 | 1.81E-21 |
| MYOZ2    | -0.09956 | 2.38E-02 | 3.76E-02 |
| MYOZ3    | -0.29409 | 9.84E-12 | 5.19E-11 |
| MYPN     | 0.140699 | 1.37E-03 | 2.69E-03 |
| MYPOP    | 0.157543 | 3.32E-04 | 7.17E-04 |
| MYRIP    | -0.29239 | 1.31E-11 | 6.81E-11 |
| MYSM1    | -0.05594 | 2.05E-01 | 2.61E-01 |
| MYST1    | -0.2774  | 1.49E-10 | 6.99E-10 |
| MYST2    | -0.16474 | 1.73E-04 | 3.90E-04 |
| MYST3    | 0.048876 | 2.68E-01 | 3.30E-01 |
| MYST4    | -0.24531 | 1.70E-08 | 6.32E-08 |
| MYT1L    | 0.053536 | 2.25E-01 | 2.83E-01 |
| MYT1     | -0.03553 | 4.21E-01 | 4.87E-01 |
| MZF1     | -0.29397 | 1.00E-11 | 5.29E-11 |
| N4BP1    | -0.34169 | 1.50E-15 | 1.15E-14 |
| N4BP2L1  | -0.31073 | 5.44E-13 | 3.29E-12 |
| N4BP2L2  | -0.38121 | 2.94E-19 | 3.20E-18 |
| N4BP2    | 0.180268 | 3.88E-05 | 9.57E-05 |
| N4BP3    | -0.17953 | 4.17E-05 | 1.03E-04 |
| N6AMT1   | -0.21345 | 1.02E-06 | 3.07E-06 |
| N6AMT2   | -0.14785 | 7.64E-04 | 1.56E-03 |
| NAA10    | 0.327892 | 2.26E-14 | 1.55E-13 |
| NAA11    | 0.173638 | 7.46E-05 | 1.77E-04 |
| NAA15    | 0.558837 | 1.23E-43 | 6.75E-42 |
| NAA16    | -0.21224 | 1.17E-06 | 3.52E-06 |
| NAA20    | 0.241362 | 2.92E-08 | 1.06E-07 |
| NAA25    | 0.434797 | 3.65E-25 | 6.52E-24 |
| NAA30    | 0.093886 | 3.32E-02 | 5.08E-02 |
| NAA35    | 0.35052  | 2.47E-16 | 2.06E-15 |
| NAA38    | 0.368712 | 4.98E-18 | 4.85E-17 |
| NAA40    | 0.207432 | 2.06E-06 | 6.00E-06 |
| NAA50    | 0.538299 | 4.99E-40 | 2.33E-38 |
| NAAA     | -0.03979 | 3.68E-01 | 4.34E-01 |
| NAALAD2  | -0.32648 | 2.95E-14 | 2.01E-13 |
| NAALADL1 | -0.19415 | 9.10E-06 | 2.45E-05 |
| NAALADL2 | -0.14468 | 9.92E-04 | 1.99E-03 |
| NAB1     | 0.268741 | 5.71E-10 | 2.51E-09 |
| NAB2     | -0.19257 | 1.08E-05 | 2.87E-05 |
| NACA2    | 0.055376 | 2.10E-01 | 2.66E-01 |
| NACAD    | -0.05327 | 2.27E-01 | 2.85E-01 |
| NACAP1   | 0.027936 | 5.27E-01 | 5.90E-01 |
| NACA     | 0.083128 | 5.94E-02 | 8.63E-02 |
| NACC1    | 0.191276 | 1.24E-05 | 3.28E-05 |
| NACC2    | 0.037394 | 3.97E-01 | 4.64E-01 |

|         |          |          |          |
|---------|----------|----------|----------|
| NADK    | -0.01229 | 7.81E-01 | 8.18E-01 |
| NADSYN1 | -0.15294 | 4.96E-04 | 1.04E-03 |
| NAE1    | 0.26928  | 5.26E-10 | 2.32E-09 |
| NAF1    | 0.121942 | 5.59E-03 | 9.95E-03 |
| NAGA    | -0.03273 | 4.59E-01 | 5.25E-01 |
| NAGK    | 0.133475 | 2.40E-03 | 4.54E-03 |
| NAGLU   | -0.1294  | 3.26E-03 | 6.04E-03 |
| NAGPA   | -0.07809 | 7.66E-02 | 1.09E-01 |
| NAGS    | -0.06994 | 1.13E-01 | 1.53E-01 |
| NAIF1   | 0.104849 | 1.73E-02 | 2.81E-02 |
| NAIP    | -0.0816  | 6.43E-02 | 9.28E-02 |
| NALCN   | -0.33852 | 2.84E-15 | 2.11E-14 |
| NAMPT   | 0.409368 | 3.15E-22 | 4.41E-21 |
| NANOG   | -0.15458 | 4.30E-04 | 9.13E-04 |
| NANOS1  | -0.1674  | 1.35E-04 | 3.09E-04 |
| NANOS2  | 0.095981 | 2.94E-02 | 4.55E-02 |
| NANOS3  | -0.00309 | 9.44E-01 | 9.56E-01 |
| NANP    | 0.225288 | 2.38E-07 | 7.80E-07 |
| NANS    | 0.040785 | 3.56E-01 | 4.22E-01 |
| NAP1L1  | 0.108811 | 1.35E-02 | 2.24E-02 |
| NAP1L2  | -0.25502 | 4.34E-09 | 1.73E-08 |
| NAP1L3  | -0.1867  | 2.01E-05 | 5.16E-05 |
| NAP1L4  | 0.059626 | 1.77E-01 | 2.29E-01 |
| NAP1L5  | -0.18041 | 3.82E-05 | 9.44E-05 |
| NAP1L6  | -0.06871 | 1.19E-01 | 1.61E-01 |
| NAPA    | -0.3578  | 5.34E-17 | 4.77E-16 |
| NAPB    | -0.1899  | 1.43E-05 | 3.75E-05 |
| NAPEPLD | -0.09355 | 3.38E-02 | 5.16E-02 |
| NAPG    | -0.04042 | 3.60E-01 | 4.26E-01 |
| NAPRT1  | -0.10929 | 1.31E-02 | 2.17E-02 |
| NAPSA   | -0.54017 | 2.40E-40 | 1.14E-38 |
| NAPSB   | -0.45975 | 2.69E-28 | 6.10E-27 |
| NARFL   | -0.21282 | 1.09E-06 | 3.29E-06 |
| NARF    | 0.206316 | 2.34E-06 | 6.77E-06 |
| NARG2   | -0.01302 | 7.68E-01 | 8.07E-01 |
| NARS2   | 0.159781 | 2.72E-04 | 5.96E-04 |
| NARS    | 0.215272 | 8.17E-07 | 2.50E-06 |
| NASP    | 0.337475 | 3.49E-15 | 2.59E-14 |
| NAT10   | 0.162242 | 2.18E-04 | 4.84E-04 |
| NAT14   | -0.11582 | 8.52E-03 | 1.46E-02 |
| NAT15   | -0.37727 | 7.26E-19 | 7.62E-18 |
| NAT1    | -0.02805 | 5.25E-01 | 5.89E-01 |
| NAT2    | 0.051007 | 2.48E-01 | 3.08E-01 |
| NAT6    | -0.32749 | 2.44E-14 | 1.67E-13 |

|           |          |           |           |
|-----------|----------|-----------|-----------|
| NAT8B     | 0.062641 | 1.56E-01  | 2.04E-01  |
| NAT8L     | 0.243443 | 2.20E-08  | 8.05E-08  |
| NAT8      | -0.00248 | 9.55E-01  | 9.64E-01  |
| NAT9      | 0.102518 | 2.00E-02  | 3.20E-02  |
| NAV1      | 0.169607 | 1.10E-04  | 2.55E-04  |
| NAV2      | -0.05384 | 2.23E-01  | 2.80E-01  |
| NAV3      | -0.09316 | 3.46E-02  | 5.27E-02  |
| NBAS      | 0.002282 | 9.59E-01  | 9.68E-01  |
| NBEAL1    | -0.31946 | 1.11E-13  | 7.13E-13  |
| NBEAL2    | -0.26496 | 1.01E-09  | 4.32E-09  |
| NBEA      | -0.24725 | 1.30E-08  | 4.89E-08  |
| NBL1      | -0.01083 | 8.06E-01  | 8.40E-01  |
| NBLA00301 | -0.05621 | 2.03E-01  | 2.58E-01  |
| NBN       | 0.415713 | 6.15E-23  | 9.15E-22  |
| NBPF10    | -0.15041 | 6.16E-04  | 1.28E-03  |
| NBPF14    | -0.11157 | 1.13E-02  | 1.90E-02  |
| NBPF15    | -0.02378 | 5.90E-01  | 6.48E-01  |
| NBPF16    | -0.05825 | 1.87E-01  | 2.40E-01  |
| NBPF1     | -0.15916 | 2.88E-04  | 6.27E-04  |
| NBPF22P   | 0.17422  | 7.05E-05  | 1.68E-04  |
| NBPF3     | -0.23954 | 3.73E-08  | 1.33E-07  |
| NBPF4     | 0.324991 | 3.92E-14  | 2.64E-13  |
| NBPF6     | 0.24591  | 1.57E-08  | 5.84E-08  |
| NBPF7     | -0.12022 | 6.30E-03  | 1.11E-02  |
| NBPF9     | -0.1346  | 2.21E-03  | 4.19E-03  |
| NBR1      | -0.17998 | 3.99E-05  | 9.84E-05  |
| NBR2      | -0.1189  | 6.91E-03  | 1.21E-02  |
| NCALD     | -0.44268 | 3.99E-26  | 7.73E-25  |
| NCAM1     | -0.11849 | 7.10E-03  | 1.24E-02  |
| NCAM2     | -0.22667 | 2.00E-07  | 6.61E-07  |
| NCAN      | 0.075553 | 8.67E-02  | 1.21E-01  |
| NCAPD2    | 0.667875 | 8.31E-68  | 8.43E-66  |
| NCAPD3    | 0.530412 | 1.04E-38  | 4.45E-37  |
| NCAPG2    | 0.755864 | 2.03E-96  | 3.07E-94  |
| NCAPG     | 0.90804  | 5.28E-196 | 5.28E-192 |
| NCAPH2    | 0.155625 | 3.93E-04  | 8.39E-04  |
| NCAPH     | 0.880409 | 2.38E-168 | 2.98E-165 |
| NCBP1     | 0.452153 | 2.57E-27  | 5.45E-26  |
| NCBP2     | 0.314195 | 2.91E-13  | 1.81E-12  |
| NCCRP1    | 0.077432 | 7.92E-02  | 1.12E-01  |
| NCDN      | -0.29902 | 4.25E-12  | 2.34E-11  |
| NCEH1     | 0.224703 | 2.56E-07  | 8.38E-07  |
| NCF1B     | -0.04531 | 3.05E-01  | 3.68E-01  |
| NCF1C     | 0.022359 | 6.13E-01  | 6.70E-01  |

|            |          |          |          |
|------------|----------|----------|----------|
| NCF1       | -0.01311 | 7.67E-01 | 8.06E-01 |
| NCF2       | -0.01673 | 7.05E-01 | 7.53E-01 |
| NCF4       | -0.13409 | 2.29E-03 | 4.34E-03 |
| NCK1       | 0.301179 | 2.93E-12 | 1.64E-11 |
| NCK2       | -0.02732 | 5.36E-01 | 5.99E-01 |
| NCKAP1L    | -0.0813  | 6.53E-02 | 9.41E-02 |
| NCKAP1     | 0.256972 | 3.28E-09 | 1.32E-08 |
| NCKAP5L    | -0.22435 | 2.68E-07 | 8.73E-07 |
| NCKAP5     | -0.14185 | 1.25E-03 | 2.47E-03 |
| NCKIPSD    | -0.03975 | 3.68E-01 | 4.34E-01 |
| NCLN       | 0.100252 | 2.29E-02 | 3.62E-02 |
| NCL        | 0.3261   | 3.18E-14 | 2.15E-13 |
| NCOA1      | -0.09192 | 3.70E-02 | 5.61E-02 |
| NCOA2      | -0.1145  | 9.30E-03 | 1.59E-02 |
| NCOA3      | 0.118899 | 6.91E-03 | 1.21E-02 |
| NCOA4      | -0.14424 | 1.03E-03 | 2.06E-03 |
| NCOA5      | -0.05561 | 2.08E-01 | 2.63E-01 |
| NCOA6      | 0.100032 | 2.32E-02 | 3.67E-02 |
| NCOA7      | -0.06009 | 1.73E-01 | 2.25E-01 |
| NCOR1      | -0.14726 | 8.02E-04 | 1.64E-03 |
| NCOR2      | -0.14438 | 1.02E-03 | 2.04E-03 |
| NCR1       | 0.158571 | 3.03E-04 | 6.58E-04 |
| NCR2       | 0.001877 | 9.66E-01 | 9.74E-01 |
| NCR3       | -0.11587 | 8.49E-03 | 1.46E-02 |
| NCRNA00028 | -0.07944 | 7.17E-02 | 1.02E-01 |
| NCRNA00029 | 0.000284 | 9.95E-01 | 9.96E-01 |
| NCRNA00032 | -0.10693 | 1.52E-02 | 2.50E-02 |
| NCRNA00051 | 0.071314 | 1.06E-01 | 1.45E-01 |
| NCRNA00052 | 0.180684 | 3.72E-05 | 9.20E-05 |
| NCRNA00081 | -0.12083 | 6.04E-03 | 1.07E-02 |
| NCRNA00085 | -0.20983 | 1.56E-06 | 4.61E-06 |
| NCRNA00086 | -0.28559 | 4.02E-11 | 1.98E-10 |
| NCRNA00087 | -0.34257 | 1.26E-15 | 9.73E-15 |
| NCRNA00092 | -0.43578 | 2.78E-25 | 5.01E-24 |
| NCRNA00093 | -0.2379  | 4.65E-08 | 1.64E-07 |
| NCRNA00094 | -0.22189 | 3.64E-07 | 1.17E-06 |
| NCRNA00095 | 0.039055 | 3.76E-01 | 4.43E-01 |
| NCRNA00099 | 0.07499  | 8.91E-02 | 1.24E-01 |
| NCRNA00105 | -0.19381 | 9.44E-06 | 2.54E-05 |
| NCRNA00107 | -0.27961 | 1.05E-10 | 4.99E-10 |
| NCRNA00110 | -0.0471  | 2.86E-01 | 3.48E-01 |
| NCRNA00111 | -0.03929 | 3.74E-01 | 4.40E-01 |
| NCRNA00112 | 0.044231 | 3.16E-01 | 3.81E-01 |
| NCRNA00113 | -0.05973 | 1.76E-01 | 2.28E-01 |



|             |          |           |           |
|-------------|----------|-----------|-----------|
| NCRNA00114  | -0.03373 | 4.45E-01  | 5.11E-01  |
| NCRNA00115  | -0.07217 | 1.02E-01  | 1.40E-01  |
| NCRNA00116  | 0.063487 | 1.50E-01  | 1.98E-01  |
| NCRNA00119  | 0.076279 | 8.37E-02  | 1.18E-01  |
| NCRNA00120  | 0.167954 | 1.28E-04  | 2.95E-04  |
| NCRNA00152  | 0.375491 | 1.09E-18  | 1.13E-17  |
| NCRNA00157  | 0.069899 | 1.13E-01  | 1.54E-01  |
| NCRNA00158  | 0.128972 | 3.37E-03  | 6.22E-03  |
| NCRNA00159  | 0.011984 | 7.86E-01  | 8.23E-01  |
| NCRNA00160  | -0.15625 | 3.72E-04  | 7.98E-04  |
| NCRNA00161  | -0.0629  | 1.54E-01  | 2.02E-01  |
| NCRNA00162  | 0.124821 | 4.56E-03  | 8.24E-03  |
| NCRNA00164  | 0.009188 | 8.35E-01  | 8.65E-01  |
| NCRNA00167  | -0.01587 | 7.19E-01  | 7.66E-01  |
| NCRNA00169  | -0.06473 | 1.42E-01  | 1.89E-01  |
| NCRNA00171  | -0.14359 | 1.08E-03  | 2.17E-03  |
| NCRNA00173  | -0.15939 | 2.82E-04  | 6.15E-04  |
| NCRNA00174  | -0.29985 | 3.68E-12  | 2.04E-11  |
| NCRNA00175  | -0.11444 | 9.34E-03  | 1.59E-02  |
| NCRNA00176  | -0.02569 | 5.61E-01  | 6.22E-01  |
| NCRNA00181  | -0.04694 | 2.88E-01  | 3.50E-01  |
| NCRNA00182  | -0.3631  | 1.71E-17  | 1.60E-16  |
| NCRNA00183  | -0.02229 | 6.14E-01  | 6.70E-01  |
| NCRNA00185  | -0.10726 | 1.49E-02  | 2.45E-02  |
| NCRNA00188  | -0.04187 | 3.43E-01  | 4.09E-01  |
| NCRNA00189  | 0.18785  | 1.78E-05  | 4.61E-05  |
| NCRNA00200  | 0.129311 | 3.28E-03  | 6.08E-03  |
| NCRNA00201  | -0.37341 | 1.74E-18  | 1.77E-17  |
| NCRNA00202  | -0.22153 | 3.81E-07  | 1.22E-06  |
| NCRNA00203  | -0.12285 | 5.24E-03  | 9.38E-03  |
| NCRNA00204B | -0.17306 | 7.89E-05  | 1.87E-04  |
| NCRNA00207  | 0.06821  | 1.22E-01  | 1.65E-01  |
| NCRNA00219  | -0.2543  | 4.81E-09  | 1.90E-08  |
| NCRNA00230B | -0.05048 | 2.53E-01  | 3.14E-01  |
| NCRNA00235  | -0.00287 | 9.48E-01  | 9.59E-01  |
| NCS1        | 0.287235 | 3.07E-11  | 1.54E-10  |
| NCSTN       | 0.000734 | 9.87E-01  | 9.90E-01  |
| NDC80       | 0.85716  | 6.20E-150 | 3.26E-147 |
| NDE1        | 0.161298 | 2.37E-04  | 5.24E-04  |
| NDEL1       | -0.06265 | 1.56E-01  | 2.04E-01  |
| NDFIP1      | -0.26932 | 5.22E-10  | 2.31E-09  |
| NDFIP2      | 0.175361 | 6.31E-05  | 1.51E-04  |
| NDNL2       | -0.04128 | 3.50E-01  | 4.16E-01  |
| NDN         | -0.32415 | 4.60E-14  | 3.07E-13  |

|          |          |          |          |
|----------|----------|----------|----------|
| NDOR1    | -0.06637 | 1.33E-01 | 1.77E-01 |
| NDP      | 0.055536 | 2.08E-01 | 2.64E-01 |
| NDRG1    | 0.156279 | 3.71E-04 | 7.96E-04 |
| NDRG2    | -0.39093 | 2.98E-20 | 3.57E-19 |
| NDRG3    | 0.074135 | 9.28E-02 | 1.29E-01 |
| NDRG4    | 0.189308 | 1.53E-05 | 3.99E-05 |
| NDST1    | -0.26626 | 8.31E-10 | 3.59E-09 |
| NDST2    | -0.29921 | 4.11E-12 | 2.27E-11 |
| NDST3    | 0.116426 | 8.18E-03 | 1.41E-02 |
| NDST4    | 0.175791 | 6.05E-05 | 1.46E-04 |
| NDUFA10  | -0.00342 | 9.38E-01 | 9.52E-01 |
| NDUFA11  | 0.10601  | 1.61E-02 | 2.63E-02 |
| NDUFA12  | 0.380917 | 3.14E-19 | 3.43E-18 |
| NDUFA13  | -0.00027 | 9.95E-01 | 9.96E-01 |
| NDUFA1   | 0.100796 | 2.22E-02 | 3.52E-02 |
| NDUFA2   | -0.11915 | 6.79E-03 | 1.19E-02 |
| NDUFA3   | 0.079631 | 7.10E-02 | 1.01E-01 |
| NDUFA4L2 | 0.033184 | 4.52E-01 | 5.19E-01 |
| NDUFA4   | 0.058654 | 1.84E-01 | 2.37E-01 |
| NDUFA5   | -0.00775 | 8.61E-01 | 8.86E-01 |
| NDUFA6   | 0.121225 | 5.88E-03 | 1.04E-02 |
| NDUFA7   | 0.008491 | 8.48E-01 | 8.75E-01 |
| NDUFA8   | 0.153064 | 4.91E-04 | 1.03E-03 |
| NDUFA9   | 0.454978 | 1.12E-27 | 2.44E-26 |
| NDUFAB1  | 0.190196 | 1.39E-05 | 3.64E-05 |
| NDUFAB1  | -0.29031 | 1.85E-11 | 9.48E-11 |
| NDUFAB2  | 0.099048 | 2.46E-02 | 3.87E-02 |
| NDUFAB3  | -0.08976 | 4.17E-02 | 6.26E-02 |
| NDUFAB4  | 0.309117 | 7.26E-13 | 4.33E-12 |
| NDUFB10  | -0.04344 | 3.25E-01 | 3.90E-01 |
| NDUFB11  | 0.111783 | 1.11E-02 | 1.87E-02 |
| NDUFB1   | 0.088441 | 4.48E-02 | 6.68E-02 |
| NDUFB2   | 0.125276 | 4.41E-03 | 7.99E-03 |
| NDUFB3   | 0.291899 | 1.42E-11 | 7.36E-11 |
| NDUFB4   | 0.288595 | 2.46E-11 | 1.24E-10 |
| NDUFB5   | 0.32895  | 1.84E-14 | 1.28E-13 |
| NDUFB6   | 0.247273 | 1.30E-08 | 4.88E-08 |
| NDUFB7   | 0.048409 | 2.73E-01 | 3.35E-01 |
| NDUFB8   | 0.078328 | 7.57E-02 | 1.08E-01 |
| NDUFB9   | 0.157107 | 3.45E-04 | 7.43E-04 |
| NDUFC1   | 0.066683 | 1.31E-01 | 1.75E-01 |
| NDUFC2   | 0.16098  | 2.44E-04 | 5.39E-04 |
| NDUFS1   | 0.33793  | 3.19E-15 | 2.37E-14 |
| NDUFS2   | 0.053987 | 2.21E-01 | 2.79E-01 |

|        |          |           |           |
|--------|----------|-----------|-----------|
| NDUFS3 | 0.116217 | 8.29E-03  | 1.43E-02  |
| NDUFS4 | 0.04274  | 3.33E-01  | 3.98E-01  |
| NDUFS5 | 0.082488 | 6.14E-02  | 8.90E-02  |
| NDUFS6 | 0.2921   | 1.37E-11  | 7.13E-11  |
| NDUFS7 | -0.00128 | 9.77E-01  | 9.82E-01  |
| NDUFS8 | 0.103994 | 1.82E-02  | 2.95E-02  |
| NDUFV1 | 0.027133 | 5.39E-01  | 6.01E-01  |
| NDUFV2 | 0.074699 | 9.04E-02  | 1.26E-01  |
| NDUFV3 | -0.02131 | 6.29E-01  | 6.85E-01  |
| NEAT1  | -0.28531 | 4.20E-11  | 2.06E-10  |
| NEBL   | -0.01465 | 7.40E-01  | 7.84E-01  |
| NEB    | 0.125671 | 4.29E-03  | 7.78E-03  |
| NECAB1 | -0.17755 | 5.09E-05  | 1.24E-04  |
| NECAB2 | 0.220037 | 4.58E-07  | 1.45E-06  |
| NECAB3 | -0.22487 | 2.51E-07  | 8.21E-07  |
| NECAP1 | 0.174072 | 7.16E-05  | 1.70E-04  |
| NECAP2 | 0.007825 | 8.59E-01  | 8.85E-01  |
| NEDD1  | 0.505183 | 1.04E-34  | 3.51E-33  |
| NEDD4L | -0.41343 | 1.11E-22  | 1.61E-21  |
| NEDD4  | 0.207897 | 1.95E-06  | 5.70E-06  |
| NEDD8  | 0.245194 | 1.73E-08  | 6.41E-08  |
| NEDD9  | -0.48338 | 1.64E-31  | 4.65E-30  |
| NEFH   | 0.183997 | 2.65E-05  | 6.70E-05  |
| NEFL   | 0.002956 | 9.47E-01  | 9.58E-01  |
| NEFM   | 0.137425 | 1.77E-03  | 3.42E-03  |
| NEGR1  | -0.40542 | 8.55E-22  | 1.16E-20  |
| NEIL1  | -0.52491 | 8.30E-38  | 3.35E-36  |
| NEIL2  | -0.1291  | 3.34E-03  | 6.16E-03  |
| NEIL3  | 0.700263 | 4.09E-77  | 4.84E-75  |
| NEK10  | -0.16823 | 1.25E-04  | 2.88E-04  |
| NEK11  | -0.26053 | 1.95E-09  | 8.07E-09  |
| NEK1   | -0.11634 | 8.23E-03  | 1.42E-02  |
| NEK2   | 0.853232 | 3.80E-147 | 1.90E-144 |
| NEK3   | 0.06402  | 1.47E-01  | 1.94E-01  |
| NEK4   | 0.073203 | 9.70E-02  | 1.34E-01  |
| NEK5   | -0.20729 | 2.09E-06  | 6.09E-06  |
| NEK6   | -0.00396 | 9.29E-01  | 9.43E-01  |
| NEK7   | -0.18878 | 1.61E-05  | 4.21E-05  |
| NEK8   | -0.43322 | 5.64E-25  | 9.91E-24  |
| NEK9   | -0.2978  | 5.24E-12  | 2.85E-11  |
| NELF   | -0.07206 | 1.02E-01  | 1.41E-01  |
| NELL1  | -0.27744 | 1.48E-10  | 6.95E-10  |
| NELL2  | -0.12401 | 4.83E-03  | 8.69E-03  |
| NENF   | -0.18953 | 1.49E-05  | 3.90E-05  |

|          |          |          |          |
|----------|----------|----------|----------|
| NEO1     | -0.20794 | 1.94E-06 | 5.68E-06 |
| NES      | -0.01418 | 7.48E-01 | 7.90E-01 |
| NET1     | 0.090005 | 4.12E-02 | 6.18E-02 |
| NETO1    | 0.257229 | 3.16E-09 | 1.27E-08 |
| NETO2    | 0.36616  | 8.74E-18 | 8.35E-17 |
| NEU1     | 0.053804 | 2.23E-01 | 2.80E-01 |
| NEU2     | 0.202503 | 3.61E-06 | 1.03E-05 |
| NEU3     | 0.103446 | 1.89E-02 | 3.04E-02 |
| NEU4     | 0.160647 | 2.52E-04 | 5.54E-04 |
| NEURL1B  | 0.044257 | 3.16E-01 | 3.81E-01 |
| NEURL2   | 0.098478 | 2.54E-02 | 3.98E-02 |
| NEURL3   | 0.08706  | 4.83E-02 | 7.14E-02 |
| NEURL4   | -0.14049 | 1.39E-03 | 2.74E-03 |
| NEURL    | 0.172699 | 8.17E-05 | 1.93E-04 |
| NEUROD1  | 0.089701 | 4.19E-02 | 6.27E-02 |
| NEUROD2  | -0.08355 | 5.81E-02 | 8.46E-02 |
| NEUROD4  | 0.157368 | 3.37E-04 | 7.27E-04 |
| NEUROD6  | 0.033452 | 4.49E-01 | 5.15E-01 |
| NEUROG1  | 0.051551 | 2.43E-01 | 3.03E-01 |
| NEUROG2  | 0.272394 | 3.26E-10 | 1.48E-09 |
| NEUROG3  | 0.082518 | 6.13E-02 | 8.88E-02 |
| NEXN     | -0.08353 | 5.82E-02 | 8.47E-02 |
| NF1P1    | 0.049473 | 2.62E-01 | 3.24E-01 |
| NF1      | 0.025421 | 5.65E-01 | 6.25E-01 |
| NF2      | 0.030095 | 4.96E-01 | 5.60E-01 |
| NFAM1    | -0.11315 | 1.02E-02 | 1.72E-02 |
| NFASC    | -0.33057 | 1.35E-14 | 9.46E-14 |
| NFAT5    | -0.32511 | 3.84E-14 | 2.59E-13 |
| NFATC1   | -0.39328 | 1.70E-20 | 2.07E-19 |
| NFATC2IP | -0.08636 | 5.01E-02 | 7.39E-02 |
| NFATC2   | -0.11467 | 9.20E-03 | 1.57E-02 |
| NFATC3   | -0.41858 | 2.90E-23 | 4.46E-22 |
| NFATC4   | -0.0773  | 7.97E-02 | 1.13E-01 |
| NFE2L1   | 0.038401 | 3.84E-01 | 4.51E-01 |
| NFE2L2   | -0.14565 | 9.17E-04 | 1.85E-03 |
| NFE2L3   | 0.064562 | 1.43E-01 | 1.90E-01 |
| NFE2     | -0.2587  | 2.55E-09 | 1.04E-08 |
| NFIA     | -0.35819 | 4.91E-17 | 4.40E-16 |
| NFIB     | -0.1947  | 8.57E-06 | 2.32E-05 |
| NFIC     | -0.22044 | 4.35E-07 | 1.38E-06 |
| NFIL3    | 0.213804 | 9.73E-07 | 2.95E-06 |
| NFIX     | -0.64748 | 1.59E-62 | 1.48E-60 |
| NFKB1    | -0.14317 | 1.12E-03 | 2.23E-03 |
| NFKB2    | 0.078707 | 7.43E-02 | 1.06E-01 |

|         |          |          |          |
|---------|----------|----------|----------|
| NFKBIA  | -0.13614 | 1.96E-03 | 3.76E-03 |
| NFKBIB  | 0.098645 | 2.52E-02 | 3.95E-02 |
| NFKBID  | -0.14637 | 8.63E-04 | 1.75E-03 |
| NFKBIE  | 0.147636 | 7.77E-04 | 1.59E-03 |
| NFKBIL1 | -0.05124 | 2.46E-01 | 3.06E-01 |
| NFKBIL2 | 0.451137 | 3.47E-27 | 7.27E-26 |
| NFKBIZ  | -0.02747 | 5.34E-01 | 5.97E-01 |
| NFRKB   | -0.00916 | 8.36E-01 | 8.65E-01 |
| NFS1    | 0.080833 | 6.68E-02 | 9.61E-02 |
| NFU1    | 0.245327 | 1.70E-08 | 6.30E-08 |
| NFX1    | -0.13524 | 2.10E-03 | 4.00E-03 |
| NFXL1   | 0.387814 | 6.27E-20 | 7.26E-19 |
| NFYA    | 0.229835 | 1.34E-07 | 4.51E-07 |
| NFYB    | 0.143756 | 1.07E-03 | 2.14E-03 |
| NFYC    | -0.20532 | 2.62E-06 | 7.55E-06 |
| NGB     | 0.161637 | 2.30E-04 | 5.10E-04 |
| NGDN    | 0.187695 | 1.81E-05 | 4.68E-05 |
| NGEF    | 0.243904 | 2.06E-08 | 7.59E-08 |
| NGFRAP1 | -0.04307 | 3.29E-01 | 3.95E-01 |
| NGFR    | -0.29163 | 1.48E-11 | 7.68E-11 |
| NGF     | -0.06092 | 1.67E-01 | 2.18E-01 |
| NGLY1   | 0.010249 | 8.17E-01 | 8.49E-01 |
| NGRN    | 0.030174 | 4.94E-01 | 5.59E-01 |
| NHEDC1  | -0.06205 | 1.60E-01 | 2.09E-01 |
| NHEDC2  | 0.164661 | 1.75E-04 | 3.93E-04 |
| NHEG1   | 0.063283 | 1.52E-01 | 2.00E-01 |
| NHEJ1   | -0.06011 | 1.73E-01 | 2.25E-01 |
| NHLH1   | 0.078097 | 7.66E-02 | 1.09E-01 |
| NHLH2   | -0.0732  | 9.70E-02 | 1.34E-01 |
| NHLRC1  | -0.01381 | 7.54E-01 | 7.96E-01 |
| NHLRC2  | 0.186882 | 1.97E-05 | 5.07E-05 |
| NHLRC3  | -0.10296 | 1.94E-02 | 3.12E-02 |
| NHLRC4  | -0.35742 | 5.78E-17 | 5.15E-16 |
| NHP2L1  | -0.01388 | 7.53E-01 | 7.95E-01 |
| NHP2    | 0.076141 | 8.43E-02 | 1.18E-01 |
| NHSL1   | -0.13632 | 1.93E-03 | 3.71E-03 |
| NHSL2   | -0.30898 | 7.45E-13 | 4.43E-12 |
| NHS     | -0.10073 | 2.22E-02 | 3.53E-02 |
| NICN1   | -0.57911 | 1.88E-47 | 1.20E-45 |
| NID1    | 0.109049 | 1.33E-02 | 2.21E-02 |
| NID2    | 0.22571  | 2.26E-07 | 7.42E-07 |
| NIF3L1  | 0.349775 | 2.88E-16 | 2.38E-15 |
| NINJ1   | -0.2484  | 1.11E-08 | 4.20E-08 |
| NINJ2   | -0.38383 | 1.60E-19 | 1.79E-18 |

|           |          |          |          |
|-----------|----------|----------|----------|
| NINL      | -0.15541 | 4.00E-04 | 8.53E-04 |
| NIN       | 0.095112 | 3.09E-02 | 4.76E-02 |
| NIP7      | 0.331392 | 1.15E-14 | 8.13E-14 |
| NIPA1     | 0.008679 | 8.44E-01 | 8.73E-01 |
| NIPA2     | 0.223059 | 3.15E-07 | 1.02E-06 |
| NIPAL1    | 0.204895 | 2.75E-06 | 7.91E-06 |
| NIPAL2    | -0.17865 | 4.56E-05 | 1.12E-04 |
| NIPAL3    | -0.47492 | 2.48E-30 | 6.53E-29 |
| NIPAL4    | 0.25261  | 6.13E-09 | 2.40E-08 |
| NIPBL     | -0.01984 | 6.53E-01 | 7.07E-01 |
| NIPSNAP1  | 0.266495 | 8.02E-10 | 3.47E-09 |
| NIPSNAP3A | -0.02786 | 5.28E-01 | 5.92E-01 |
| NIPSNAP3B | -0.24619 | 1.51E-08 | 5.63E-08 |
| NISCH     | -0.48261 | 2.10E-31 | 5.89E-30 |
| NIT1      | -0.05156 | 2.43E-01 | 3.03E-01 |
| NIT2      | 0.245408 | 1.68E-08 | 6.24E-08 |
| NKAIN1    | 0.402124 | 1.95E-21 | 2.57E-20 |
| NKAIN2    | 0.156459 | 3.65E-04 | 7.84E-04 |
| NKAIN3    | 0.0157   | 7.22E-01 | 7.68E-01 |
| NKAIN4    | 0.205912 | 2.45E-06 | 7.07E-06 |
| NKAPL     | -0.19674 | 6.86E-06 | 1.88E-05 |
| NKAP      | 0.195206 | 8.11E-06 | 2.20E-05 |
| NKD1      | -0.24759 | 1.24E-08 | 4.68E-08 |
| NKD2      | -0.23985 | 3.58E-08 | 1.28E-07 |
| NKG7      | 0.165069 | 1.68E-04 | 3.79E-04 |
| NKIRAS1   | -0.33585 | 4.81E-15 | 3.53E-14 |
| NKIRAS2   | 0.400874 | 2.66E-21 | 3.46E-20 |
| NKPD1     | 0.164068 | 1.84E-04 | 4.14E-04 |
| NKRF      | 0.341053 | 1.71E-15 | 1.30E-14 |
| NKTR      | -0.27652 | 1.72E-10 | 7.99E-10 |
| NKX1-2    | 0.236833 | 5.35E-08 | 1.88E-07 |
| NKX2-1    | -0.42214 | 1.13E-23 | 1.80E-22 |
| NKX2-2    | 0.075883 | 8.54E-02 | 1.20E-01 |
| NKX2-3    | 0.168801 | 1.19E-04 | 2.73E-04 |
| NKX2-4    | 0.116501 | 8.13E-03 | 1.40E-02 |
| NKX2-5    | 0.212928 | 1.08E-06 | 3.26E-06 |
| NKX2-6    | 0.129387 | 3.27E-03 | 6.05E-03 |
| NKX2-8    | -0.07297 | 9.81E-02 | 1.35E-01 |
| NKX3-1    | 0.057109 | 1.96E-01 | 2.50E-01 |
| NKX3-2    | 0.178443 | 4.65E-05 | 1.14E-04 |
| NKX6-1    | 0.17818  | 4.78E-05 | 1.17E-04 |
| NKX6-2    | -0.12224 | 5.47E-03 | 9.76E-03 |
| NKX6-3    | -0.01811 | 6.82E-01 | 7.32E-01 |
| NLE1      | 0.311018 | 5.17E-13 | 3.13E-12 |

|           |          |          |          |
|-----------|----------|----------|----------|
| NLGN1     | 0.053467 | 2.26E-01 | 2.84E-01 |
| NLGN2     | 0.075827 | 8.56E-02 | 1.20E-01 |
| NLGN3     | -0.11119 | 1.16E-02 | 1.94E-02 |
| NLGN4X    | 0.108778 | 1.35E-02 | 2.24E-02 |
| NLGN4Y    | 0.068292 | 1.22E-01 | 1.64E-01 |
| NLK       | 0.035009 | 4.28E-01 | 4.94E-01 |
| NLN       | 0.385622 | 1.05E-19 | 1.19E-18 |
| NLRC3     | -0.20744 | 2.05E-06 | 5.99E-06 |
| NLRC4     | -0.09254 | 3.58E-02 | 5.44E-02 |
| NLRC5     | 0.141059 | 1.33E-03 | 2.62E-03 |
| NLRP10    | 0.121872 | 5.62E-03 | 9.99E-03 |
| NLRP11    | 0.173858 | 7.30E-05 | 1.74E-04 |
| NLRP12    | -0.09384 | 3.32E-02 | 5.09E-02 |
| NLRP13    | 0.022297 | 6.14E-01 | 6.70E-01 |
| NLRP14    | 0.000381 | 9.93E-01 | 9.95E-01 |
| NLRP1     | -0.37902 | 4.87E-19 | 5.19E-18 |
| NLRP2     | -0.04357 | 3.24E-01 | 3.89E-01 |
| NLRP3     | -0.16342 | 1.96E-04 | 4.38E-04 |
| NLRP4     | 0.02103  | 6.34E-01 | 6.89E-01 |
| NLRP5     | 0.031577 | 4.75E-01 | 5.40E-01 |
| NLRP6     | -0.03257 | 4.61E-01 | 5.27E-01 |
| NLRP7     | 0.053862 | 2.22E-01 | 2.80E-01 |
| NLRP8     | 0.055256 | 2.11E-01 | 2.67E-01 |
| NLRP9     | -0.19184 | 1.17E-05 | 3.09E-05 |
| NLRX1     | -0.25976 | 2.18E-09 | 8.97E-09 |
| NMBR      | -0.21105 | 1.35E-06 | 4.03E-06 |
| NMB       | 0.039997 | 3.65E-01 | 4.31E-01 |
| NMD3      | 0.53485  | 1.90E-39 | 8.56E-38 |
| NME1-NME2 | 0.213586 | 9.99E-07 | 3.02E-06 |
| NME1      | 0.547335 | 1.39E-41 | 6.86E-40 |
| NME2P1    | 0.223168 | 3.11E-07 | 1.00E-06 |
| NME2      | 0.30803  | 8.82E-13 | 5.21E-12 |
| NME3      | -0.29422 | 9.63E-12 | 5.08E-11 |
| NME4      | 0.062712 | 1.55E-01 | 2.04E-01 |
| NME5      | -0.31579 | 2.17E-13 | 1.36E-12 |
| NME6      | 0.211916 | 1.22E-06 | 3.65E-06 |
| NME7      | 0.123741 | 4.92E-03 | 8.85E-03 |
| NMI       | 0.298181 | 4.91E-12 | 2.68E-11 |
| NMNAT1    | -0.07528 | 8.79E-02 | 1.23E-01 |
| NMNAT2    | 0.020379 | 6.45E-01 | 6.99E-01 |
| NMNAT3    | -0.2117  | 1.25E-06 | 3.74E-06 |
| NMRAL1    | -0.0799  | 7.00E-02 | 1.00E-01 |
| NMT1      | 0.287519 | 2.93E-11 | 1.47E-10 |
| NMT2      | -0.07539 | 8.74E-02 | 1.22E-01 |

|          |          |          |          |
|----------|----------|----------|----------|
| NMUR1    | -0.28661 | 3.41E-11 | 1.69E-10 |
| NMUR2    | -0.15766 | 3.28E-04 | 7.10E-04 |
| NMU      | 0.255481 | 4.06E-09 | 1.62E-08 |
| NNAT     | -0.15381 | 4.60E-04 | 9.71E-04 |
| NNMT     | -0.06141 | 1.64E-01 | 2.14E-01 |
| NNT      | 0.041498 | 3.47E-01 | 4.13E-01 |
| NOB1     | 0.057554 | 1.92E-01 | 2.46E-01 |
| NOBOX    | 0.046131 | 2.96E-01 | 3.59E-01 |
| NOC2L    | 0.218561 | 5.48E-07 | 1.72E-06 |
| NOC3L    | 0.32281  | 5.92E-14 | 3.92E-13 |
| NOC4L    | 0.281835 | 7.38E-11 | 3.55E-10 |
| NOD1     | -0.53623 | 1.12E-39 | 5.08E-38 |
| NOD2     | -0.03893 | 3.78E-01 | 4.44E-01 |
| NODAL    | -0.03692 | 4.03E-01 | 4.69E-01 |
| NOG      | -0.20289 | 3.46E-06 | 9.84E-06 |
| NOL10    | 0.538378 | 4.84E-40 | 2.26E-38 |
| NOL11    | 0.544955 | 3.60E-41 | 1.74E-39 |
| NOL12    | -0.06006 | 1.74E-01 | 2.25E-01 |
| NOL3     | -0.18324 | 2.87E-05 | 7.20E-05 |
| NOL4     | 0.080121 | 6.93E-02 | 9.93E-02 |
| NOL6     | 0.106833 | 1.53E-02 | 2.51E-02 |
| NOL7     | 0.302859 | 2.19E-12 | 1.25E-11 |
| NOL8     | 0.078527 | 7.50E-02 | 1.07E-01 |
| NOL9     | 0.083643 | 5.78E-02 | 8.42E-02 |
| NOLC1    | 0.341208 | 1.66E-15 | 1.26E-14 |
| NOM1     | 0.250232 | 8.58E-09 | 3.30E-08 |
| NOMO1    | 0.069103 | 1.17E-01 | 1.59E-01 |
| NOMO2    | 0.066969 | 1.29E-01 | 1.73E-01 |
| NOMO3    | -0.04308 | 3.29E-01 | 3.95E-01 |
| NONO     | 0.263869 | 1.19E-09 | 5.04E-09 |
| NOP10    | 0.276372 | 1.76E-10 | 8.17E-10 |
| NOP14    | 0.180135 | 3.93E-05 | 9.69E-05 |
| NOP16    | 0.286937 | 3.23E-11 | 1.61E-10 |
| NOP2     | 0.389643 | 4.06E-20 | 4.79E-19 |
| NOP56    | 0.408853 | 3.59E-22 | 5.02E-21 |
| NOP58    | 0.386881 | 7.81E-20 | 8.96E-19 |
| NOS1AP   | -0.20956 | 1.61E-06 | 4.75E-06 |
| NOS1     | -0.08525 | 5.32E-02 | 7.80E-02 |
| NOS2     | 0.042436 | 3.36E-01 | 4.02E-01 |
| NOS3     | -0.09524 | 3.07E-02 | 4.73E-02 |
| NOSIP    | 0.135968 | 1.98E-03 | 3.81E-03 |
| NOSTRIN  | -0.43735 | 1.79E-25 | 3.28E-24 |
| NOTCH1   | -0.28915 | 2.24E-11 | 1.14E-10 |
| NOTCH2NL | -0.01725 | 6.96E-01 | 7.45E-01 |



|        |          |          |          |
|--------|----------|----------|----------|
| NOTCH2 | -0.05056 | 2.52E-01 | 3.13E-01 |
| NOTCH3 | 0.095046 | 3.10E-02 | 4.78E-02 |
| NOTCH4 | -0.26716 | 7.25E-10 | 3.15E-09 |
| NOTO   | -0.22585 | 2.22E-07 | 7.30E-07 |
| NOTUM  | -0.20476 | 2.80E-06 | 8.03E-06 |
| NOVA1  | 0.06623  | 1.33E-01 | 1.78E-01 |
| NOVA2  | -0.19119 | 1.25E-05 | 3.30E-05 |
| NOV    | 0.044615 | 3.12E-01 | 3.77E-01 |
| NOX1   | -0.03287 | 4.57E-01 | 5.23E-01 |
| NOX3   | 0.029481 | 5.04E-01 | 5.69E-01 |
| NOX4   | 0.121983 | 5.57E-03 | 9.93E-03 |
| NOX5   | 0.011737 | 7.90E-01 | 8.27E-01 |
| NOXA1  | -0.28422 | 5.03E-11 | 2.45E-10 |
| NOXO1  | -0.03765 | 3.94E-01 | 4.61E-01 |
| NPAS1  | -0.00399 | 9.28E-01 | 9.43E-01 |
| NPAS2  | -0.03537 | 4.23E-01 | 4.89E-01 |
| NPAS3  | -0.22364 | 2.93E-07 | 9.50E-07 |
| NPAS4  | -0.0189  | 6.69E-01 | 7.20E-01 |
| NPAT   | 0.035177 | 4.26E-01 | 4.92E-01 |
| NPBWR1 | 0.187059 | 1.93E-05 | 4.98E-05 |
| NPBWR2 | 0.050965 | 2.48E-01 | 3.09E-01 |
| NPB    | 0.106619 | 1.55E-02 | 2.54E-02 |
| NPC1L1 | 0.077461 | 7.90E-02 | 1.12E-01 |
| NPC1   | 0.125212 | 4.43E-03 | 8.02E-03 |
| NPC2   | -0.46774 | 2.35E-29 | 5.79E-28 |
| NPDC1  | -0.24507 | 1.76E-08 | 6.52E-08 |
| NPEPL1 | -0.31952 | 1.09E-13 | 7.06E-13 |
| NPEPPS | 0.374705 | 1.30E-18 | 1.34E-17 |
| NPFFR1 | -0.25056 | 8.19E-09 | 3.15E-08 |
| NPFFR2 | 0.217705 | 6.09E-07 | 1.90E-06 |
| NPFF   | -0.26139 | 1.72E-09 | 7.15E-09 |
| NPHP1  | -0.22088 | 4.12E-07 | 1.31E-06 |
| NPHP3  | -0.24904 | 1.01E-08 | 3.86E-08 |
| NPHP4  | -0.2579  | 2.86E-09 | 1.16E-08 |
| NPHS1  | -0.00998 | 8.21E-01 | 8.53E-01 |
| NPHS2  | 0.022181 | 6.16E-01 | 6.72E-01 |
| NPIPL3 | -0.24083 | 3.13E-08 | 1.13E-07 |
| NIIP   | -0.33344 | 7.72E-15 | 5.53E-14 |
| NPLOC4 | 0.18068  | 3.72E-05 | 9.20E-05 |
| NPL    | -0.01583 | 7.20E-01 | 7.66E-01 |
| NPM1   | 0.218438 | 5.57E-07 | 1.74E-06 |
| NPM2   | -0.02174 | 6.23E-01 | 6.79E-01 |
| NPM3   | 0.356342 | 7.28E-17 | 6.39E-16 |
| NPNT   | -0.35943 | 3.77E-17 | 3.42E-16 |

|         |          |          |          |
|---------|----------|----------|----------|
| NPPA    | -0.12364 | 4.96E-03 | 8.91E-03 |
| NPPB    | 0.120137 | 6.34E-03 | 1.12E-02 |
| NPPC    | -0.03352 | 4.48E-01 | 5.14E-01 |
| NPR1    | -0.41694 | 4.46E-23 | 6.73E-22 |
| NPR2    | -0.2644  | 1.10E-09 | 4.67E-09 |
| NPR3    | -0.10822 | 1.40E-02 | 2.32E-02 |
| NPRL2   | -0.18782 | 1.78E-05 | 4.62E-05 |
| NPRL3   | -0.1269  | 3.92E-03 | 7.16E-03 |
| NPSR1   | 0.105647 | 1.65E-02 | 2.68E-02 |
| NPTN    | 0.091939 | 3.70E-02 | 5.61E-02 |
| NPTX1   | -0.11278 | 1.04E-02 | 1.76E-02 |
| NPTX2   | 0.18797  | 1.76E-05 | 4.56E-05 |
| NPTXR   | -0.10214 | 2.04E-02 | 3.26E-02 |
| NPVF    | 0.014284 | 7.46E-01 | 7.89E-01 |
| NPW     | 0.078393 | 7.55E-02 | 1.07E-01 |
| NPY1R   | -0.10441 | 1.78E-02 | 2.88E-02 |
| NPY2R   | -0.1281  | 3.59E-03 | 6.60E-03 |
| NPY5R   | -0.06344 | 1.51E-01 | 1.98E-01 |
| NPY6R   | -0.26109 | 1.80E-09 | 7.46E-09 |
| NPY     | 0.068775 | 1.19E-01 | 1.61E-01 |
| NQO1    | 0.026432 | 5.50E-01 | 6.12E-01 |
| NQO2    | 0.002512 | 9.55E-01 | 9.64E-01 |
| NR0B1   | 0.169648 | 1.09E-04 | 2.54E-04 |
| NR0B2   | -0.25945 | 2.28E-09 | 9.36E-09 |
| NR1D1   | -0.01204 | 7.85E-01 | 8.22E-01 |
| NR1D2   | -0.18477 | 2.45E-05 | 6.22E-05 |
| NR1H2   | -0.28091 | 8.56E-11 | 4.09E-10 |
| NR1H3   | -0.04616 | 2.96E-01 | 3.59E-01 |
| NR1H4   | -0.00419 | 9.24E-01 | 9.40E-01 |
| NR1I2   | -0.06093 | 1.67E-01 | 2.18E-01 |
| NR1I3   | 0.137753 | 1.73E-03 | 3.34E-03 |
| NR2C1   | 0.001472 | 9.73E-01 | 9.80E-01 |
| NR2C2AP | 0.170661 | 9.94E-05 | 2.32E-04 |
| NR2C2   | -0.23568 | 6.23E-08 | 2.17E-07 |
| NR2E1   | 0.137704 | 1.73E-03 | 3.35E-03 |
| NR2E3   | -0.244   | 2.04E-08 | 7.49E-08 |
| NR2F1   | -0.34525 | 7.31E-16 | 5.81E-15 |
| NR2F2   | -0.12407 | 4.81E-03 | 8.66E-03 |
| NR2F6   | 0.034799 | 4.31E-01 | 4.97E-01 |
| NR3C1   | -0.20846 | 1.83E-06 | 5.36E-06 |
| NR3C2   | -0.53733 | 7.28E-40 | 3.34E-38 |
| NR4A1   | -0.26492 | 1.02E-09 | 4.35E-09 |
| NR4A2   | -0.15602 | 3.80E-04 | 8.12E-04 |
| NR4A3   | -0.17747 | 5.13E-05 | 1.25E-04 |

|         |          |          |          |
|---------|----------|----------|----------|
| NR5A1   | 0.238902 | 4.06E-08 | 1.44E-07 |
| NR5A2   | -0.03683 | 4.04E-01 | 4.71E-01 |
| NR6A1   | 0.134157 | 2.28E-03 | 4.32E-03 |
| NRADDP  | -0.17725 | 5.24E-05 | 1.27E-04 |
| NRAP    | -0.23202 | 1.01E-07 | 3.44E-07 |
| NRARP   | 0.233004 | 8.86E-08 | 3.04E-07 |
| NRAS    | 0.523665 | 1.32E-37 | 5.23E-36 |
| NRBF2   | 0.243824 | 2.09E-08 | 7.67E-08 |
| NRBP1   | 0.461482 | 1.59E-28 | 3.67E-27 |
| NRBP2   | -0.31591 | 2.13E-13 | 1.33E-12 |
| NRCAM   | 0.05718  | 1.95E-01 | 2.50E-01 |
| NRD1    | 0.281412 | 7.89E-11 | 3.79E-10 |
| NRF1    | -0.0439  | 3.20E-01 | 3.85E-01 |
| NRG1    | -0.06892 | 1.18E-01 | 1.60E-01 |
| NRG2    | -0.21471 | 8.74E-07 | 2.67E-06 |
| NRG3    | -0.17286 | 8.04E-05 | 1.90E-04 |
| NRG4    | 0.000162 | 9.97E-01 | 9.98E-01 |
| NRGN    | -0.30567 | 1.34E-12 | 7.75E-12 |
| NRIP1   | 0.293814 | 1.03E-11 | 5.43E-11 |
| NRIP2   | -0.44079 | 6.81E-26 | 1.29E-24 |
| NRIP3   | 0.175832 | 6.02E-05 | 1.45E-04 |
| NRK     | 0.042394 | 3.37E-01 | 4.02E-01 |
| NRL     | -0.19848 | 5.67E-06 | 1.57E-05 |
| NRM     | 0.516251 | 2.02E-36 | 7.53E-35 |
| NRN1L   | -0.29773 | 5.30E-12 | 2.88E-11 |
| NRN1    | -0.05476 | 2.15E-01 | 2.71E-01 |
| NRP1    | -0.09054 | 4.00E-02 | 6.02E-02 |
| NRP2    | 0.059021 | 1.81E-01 | 2.34E-01 |
| NRSN1   | 0.059571 | 1.77E-01 | 2.29E-01 |
| NRSN2   | -0.02684 | 5.43E-01 | 6.06E-01 |
| NRTN    | 0.085471 | 5.26E-02 | 7.72E-02 |
| NRXN1   | -0.08405 | 5.66E-02 | 8.26E-02 |
| NRXN2   | -0.20462 | 2.84E-06 | 8.15E-06 |
| NRXN3   | -0.30226 | 2.43E-12 | 1.38E-11 |
| NSA2    | -0.08105 | 6.61E-02 | 9.51E-02 |
| NSD1    | -0.0735  | 9.57E-02 | 1.32E-01 |
| NSDHL   | 0.271224 | 3.91E-10 | 1.75E-09 |
| NSFL1C  | 0.018853 | 6.70E-01 | 7.21E-01 |
| NSF     | 0.20306  | 3.39E-06 | 9.67E-06 |
| NSL1    | 0.144359 | 1.02E-03 | 2.04E-03 |
| NSMAF   | 0.09988  | 2.34E-02 | 3.70E-02 |
| NSMCE1  | -0.1346  | 2.21E-03 | 4.19E-03 |
| NSMCE2  | 0.196099 | 7.36E-06 | 2.00E-05 |
| NSMCE4A | -0.08739 | 4.75E-02 | 7.03E-02 |

|         |          |          |          |
|---------|----------|----------|----------|
| NSUN2   | 0.351323 | 2.09E-16 | 1.75E-15 |
| NSUN3   | 0.172555 | 8.29E-05 | 1.95E-04 |
| NSUN4   | -0.16078 | 2.49E-04 | 5.47E-04 |
| NSUN5P1 | -0.13889 | 1.58E-03 | 3.07E-03 |
| NSUN5P2 | -0.1272  | 3.84E-03 | 7.02E-03 |
| NSUN5   | 0.236127 | 5.88E-08 | 2.05E-07 |
| NSUN6   | -0.07261 | 9.98E-02 | 1.37E-01 |
| NSUN7   | -0.15185 | 5.45E-04 | 1.14E-03 |
| NT5C1A  | -0.37232 | 2.23E-18 | 2.25E-17 |
| NT5C1B  | -0.01473 | 7.39E-01 | 7.82E-01 |
| NT5C2   | -0.00089 | 9.84E-01 | 9.88E-01 |
| NT5C3L  | 0.244728 | 1.84E-08 | 6.82E-08 |
| NT5C3   | 0.420981 | 1.54E-23 | 2.42E-22 |
| NT5C    | 0.005512 | 9.01E-01 | 9.20E-01 |
| NT5DC1  | -0.13315 | 2.46E-03 | 4.64E-03 |
| NT5DC2  | 0.061235 | 1.65E-01 | 2.15E-01 |
| NT5DC3  | 0.185532 | 2.27E-05 | 5.78E-05 |
| NT5E    | -0.06081 | 1.68E-01 | 2.19E-01 |
| NT5M    | 0.075024 | 8.90E-02 | 1.24E-01 |
| NTAN1   | 0.229763 | 1.35E-07 | 4.55E-07 |
| NTF3    | -0.1657  | 1.59E-04 | 3.59E-04 |
| NTF4    | -0.28039 | 9.30E-11 | 4.43E-10 |
| NTHL1   | -0.15911 | 2.89E-04 | 6.29E-04 |
| NTM     | -0.03505 | 4.27E-01 | 4.94E-01 |
| NTN1    | -0.09973 | 2.36E-02 | 3.73E-02 |
| NTN3    | 0.047424 | 2.83E-01 | 3.45E-01 |
| NTN4    | -0.25463 | 4.60E-09 | 1.82E-08 |
| NTN5    | -0.20576 | 2.49E-06 | 7.19E-06 |
| NTNG1   | -0.24154 | 2.85E-08 | 1.03E-07 |
| NTNG2   | 0.089486 | 4.24E-02 | 6.34E-02 |
| NTRK1   | -0.09229 | 3.63E-02 | 5.50E-02 |
| NTRK2   | -0.27285 | 3.04E-10 | 1.39E-09 |
| NTRK3   | -0.46016 | 2.38E-28 | 5.42E-27 |
| NTSR1   | 0.210722 | 1.40E-06 | 4.17E-06 |
| NTSR2   | 0.10307  | 1.93E-02 | 3.10E-02 |
| NTS     | 0.145796 | 9.06E-04 | 1.83E-03 |
| NUAK1   | 0.045248 | 3.05E-01 | 3.69E-01 |
| NUAK2   | -0.2282  | 1.65E-07 | 5.49E-07 |
| NUB1    | 0.07045  | 1.10E-01 | 1.50E-01 |
| NUBP1   | -0.36401 | 1.40E-17 | 1.31E-16 |
| NUBP2   | -0.06684 | 1.30E-01 | 1.74E-01 |
| NUBPL   | 0.051674 | 2.42E-01 | 3.02E-01 |
| NUCB1   | -0.33998 | 2.12E-15 | 1.60E-14 |
| NUCB2   | -0.13767 | 1.74E-03 | 3.36E-03 |

|          |          |           |           |
|----------|----------|-----------|-----------|
| NUCKS1   | 0.037415 | 3.97E-01  | 4.63E-01  |
| NUDCD1   | 0.456954 | 6.21E-28  | 1.38E-26  |
| NUDCD2   | 0.144956 | 9.70E-04  | 1.95E-03  |
| NUDCD3   | -0.00097 | 9.83E-01  | 9.87E-01  |
| NUDC     | 0.111712 | 1.12E-02  | 1.88E-02  |
| NUDT10   | -0.00146 | 9.74E-01  | 9.80E-01  |
| NUDT11   | 0.176497 | 5.64E-05  | 1.36E-04  |
| NUDT12   | -0.22498 | 2.48E-07  | 8.10E-07  |
| NUDT13   | -0.38055 | 3.42E-19  | 3.71E-18  |
| NUDT14   | -0.13422 | 2.27E-03  | 4.30E-03  |
| NUDT15   | 0.315102 | 2.47E-13  | 1.54E-12  |
| NUDT16L1 | -0.26334 | 1.29E-09  | 5.43E-09  |
| NUDT16P1 | 0.036201 | 4.12E-01  | 4.79E-01  |
| NUDT16   | -0.36163 | 2.35E-17  | 2.17E-16  |
| NUDT17   | -0.18069 | 3.72E-05  | 9.20E-05  |
| NUDT18   | -0.19812 | 5.89E-06  | 1.63E-05  |
| NUDT19   | 0.242857 | 2.38E-08  | 8.69E-08  |
| NUDT1    | 0.572935 | 2.92E-46  | 1.79E-44  |
| NUDT21   | 0.225177 | 2.42E-07  | 7.91E-07  |
| NUDT22   | -0.05046 | 2.53E-01  | 3.14E-01  |
| NUDT2    | 0.24864  | 1.07E-08  | 4.07E-08  |
| NUDT3    | 0.313633 | 3.22E-13  | 1.99E-12  |
| NUDT4    | 0.091807 | 3.73E-02  | 5.64E-02  |
| NUDT5    | 0.245983 | 1.55E-08  | 5.78E-08  |
| NUDT6    | 0.028226 | 5.23E-01  | 5.87E-01  |
| NUDT7    | -0.35472 | 1.02E-16  | 8.86E-16  |
| NUDT8    | 0.002162 | 9.61E-01  | 9.69E-01  |
| NUDT9P1  | 0.002413 | 9.56E-01  | 9.65E-01  |
| NUDT9    | -0.09251 | 3.58E-02  | 5.45E-02  |
| NUF2     | 0.833962 | 1.47E-134 | 4.60E-132 |
| NUFIP1   | 0.273404 | 2.79E-10  | 1.28E-09  |
| NUFIP2   | 0.066768 | 1.30E-01  | 1.74E-01  |
| NUMA1    | -0.26811 | 6.28E-10  | 2.75E-09  |
| NUMBL    | 0.18375  | 2.72E-05  | 6.86E-05  |
| NUMB     | -0.21665 | 6.92E-07  | 2.14E-06  |
| NUP107   | 0.524554 | 9.49E-38  | 3.81E-36  |
| NUP133   | 0.005384 | 9.03E-01  | 9.22E-01  |
| NUP153   | 0.316435 | 1.93E-13  | 1.22E-12  |
| NUP155   | 0.554936 | 6.24E-43  | 3.33E-41  |
| NUP160   | 0.24435  | 1.94E-08  | 7.17E-08  |
| NUP188   | 0.187921 | 1.77E-05  | 4.58E-05  |
| NUP205   | 0.610297 | 7.15E-54  | 5.29E-52  |
| NUP210L  | -0.29341 | 1.10E-11  | 5.79E-11  |
| NUP210   | 0.375044 | 1.21E-18  | 1.24E-17  |

|         |          |           |           |
|---------|----------|-----------|-----------|
| NUP214  | -0.04226 | 3.39E-01  | 4.04E-01  |
| NUP35   | 0.283662 | 5.50E-11  | 2.67E-10  |
| NUP37   | 0.610626 | 6.06E-54  | 4.51E-52  |
| NUP43   | 0.285682 | 3.96E-11  | 1.95E-10  |
| NUP50   | 0.255134 | 4.27E-09  | 1.70E-08  |
| NUP54   | 0.417119 | 4.26E-23  | 6.44E-22  |
| NUP62CL | 0.297709 | 5.32E-12  | 2.89E-11  |
| NUP62   | 0.435797 | 2.76E-25  | 4.99E-24  |
| NUP85   | 0.500251 | 5.77E-34  | 1.87E-32  |
| NUP88   | 0.092824 | 3.52E-02  | 5.36E-02  |
| NUP93   | 0.349055 | 3.35E-16  | 2.75E-15  |
| NUP98   | 0.120027 | 6.39E-03  | 1.12E-02  |
| NUPL1   | 0.031969 | 4.69E-01  | 5.35E-01  |
| NUPL2   | 0.280762 | 8.76E-11  | 4.18E-10  |
| NUPR1   | -0.18508 | 2.37E-05  | 6.04E-05  |
| NUS1    | 0.356532 | 6.99E-17  | 6.15E-16  |
| NUSAP1  | 0.891713 | 9.52E-179 | 2.72E-175 |
| NUTF2   | 0.25979  | 2.17E-09  | 8.93E-09  |
| NVL     | -0.0732  | 9.71E-02  | 1.34E-01  |
| NWD1    | -0.37997 | 3.91E-19  | 4.20E-18  |
| NXF1    | -0.30628 | 1.20E-12  | 6.99E-12  |
| NXF2B   | -0.13386 | 2.33E-03  | 4.42E-03  |
| NXF2    | 0.024725 | 5.76E-01  | 6.35E-01  |
| NXF3    | -0.2366  | 5.52E-08  | 1.93E-07  |
| NXF4    | 0.026218 | 5.53E-01  | 6.14E-01  |
| NXF5    | -0.05127 | 2.45E-01  | 3.06E-01  |
| NXNL1   | -0.1125  | 1.06E-02  | 1.79E-02  |
| NXNL2   | -0.0067  | 8.79E-01  | 9.02E-01  |
| NXN     | -0.1683  | 1.24E-04  | 2.86E-04  |
| NXPH1   | 0.024023 | 5.86E-01  | 6.45E-01  |
| NXPH2   | 0.143083 | 1.13E-03  | 2.25E-03  |
| NXPH3   | -0.37793 | 6.25E-19  | 6.58E-18  |
| NXPH4   | 0.284126 | 5.10E-11  | 2.49E-10  |
| NXT1    | 0.229035 | 1.48E-07  | 4.97E-07  |
| NXT2    | 0.029516 | 5.04E-01  | 5.68E-01  |
| NYNRIN  | -0.12266 | 5.31E-03  | 9.49E-03  |
| NYX     | 0.208676 | 1.78E-06  | 5.24E-06  |
| OAF     | 0.02697  | 5.41E-01  | 6.04E-01  |
| OAS1    | 0.343731 | 9.95E-16  | 7.79E-15  |
| OAS2    | 0.146391 | 8.62E-04  | 1.75E-03  |
| OAS3    | 0.382921 | 1.98E-19  | 2.20E-18  |
| OASL    | 0.280026 | 9.85E-11  | 4.68E-10  |
| OAT     | -0.09364 | 3.36E-02  | 5.14E-02  |
| OAZ1    | 0.065433 | 1.38E-01  | 1.84E-01  |

|        |          |           |           |
|--------|----------|-----------|-----------|
| OAZ2   | -0.31029 | 5.89E-13  | 3.54E-12  |
| OAZ3   | -0.10456 | 1.76E-02  | 2.85E-02  |
| OBFC1  | -0.32662 | 2.88E-14  | 1.96E-13  |
| OBFC2A | 0.200395 | 4.58E-06  | 1.28E-05  |
| OBFC2B | 0.520235 | 4.70E-37  | 1.80E-35  |
| OBP2A  | 0.036642 | 4.07E-01  | 4.73E-01  |
| OBP2B  | 0.03352  | 4.48E-01  | 5.14E-01  |
| OBSCN  | -0.22833 | 1.62E-07  | 5.40E-07  |
| OBSL1  | -0.20133 | 4.12E-06  | 1.16E-05  |
| OC90   | -0.01411 | 7.49E-01  | 7.91E-01  |
| OCA2   | -0.37927 | 4.59E-19  | 4.90E-18  |
| OCEL1  | -0.26772 | 6.66E-10  | 2.91E-09  |
| OCIAD1 | 0.055359 | 2.10E-01  | 2.66E-01  |
| OCIAD2 | 0.102609 | 1.99E-02  | 3.18E-02  |
| OCLM   | 0.040867 | 3.55E-01  | 4.21E-01  |
| OCLN   | -0.32478 | 4.08E-14  | 2.74E-13  |
| OCM2   | -0.03277 | 4.58E-01  | 5.24E-01  |
| OCM    | -0.1053  | 1.68E-02  | 2.74E-02  |
| OCRL   | 0.222195 | 3.51E-07  | 1.13E-06  |
| ODAM   | -0.25126 | 7.42E-09  | 2.87E-08  |
| ODC1   | -0.0063  | 8.87E-01  | 9.08E-01  |
| ODF1   | -0.10879 | 1.35E-02  | 2.24E-02  |
| ODF2L  | 0.050659 | 2.51E-01  | 3.12E-01  |
| ODF2   | 0.101636 | 2.11E-02  | 3.36E-02  |
| ODF3B  | -0.28113 | 8.25E-11  | 3.95E-10  |
| ODF3L1 | -0.24758 | 1.24E-08  | 4.68E-08  |
| ODF3L2 | 0.027992 | 5.26E-01  | 5.90E-01  |
| ODF3   | -0.04622 | 2.95E-01  | 3.58E-01  |
| ODF4   | 0.014866 | 7.36E-01  | 7.80E-01  |
| ODZ1   | -0.20224 | 3.72E-06  | 1.05E-05  |
| ODZ2   | -0.17564 | 6.14E-05  | 1.48E-04  |
| ODZ3   | 0.230836 | 1.17E-07  | 3.98E-07  |
| ODZ4   | -0.11316 | 1.02E-02  | 1.72E-02  |
| OFD1   | -0.28776 | 2.82E-11  | 1.42E-10  |
| OGDHL  | 0.189582 | 1.48E-05  | 3.88E-05  |
| OGDH   | -0.00741 | 8.67E-01  | 8.91E-01  |
| OGFOD1 | 0.157996 | 3.19E-04  | 6.91E-04  |
| OGFOD2 | -0.05887 | 1.82E-01  | 2.35E-01  |
| OGFRL1 | 0.127798 | 3.67E-03  | 6.74E-03  |
| OGFR   | -0.07517 | 8.83E-02  | 1.23E-01  |
| OGG1   | 0.105161 | 1.70E-02  | 2.76E-02  |
| OGN    | -0.43082 | 1.09E-24  | 1.88E-23  |
| OGT    | -0.21621 | 7.30E-07  | 2.25E-06  |
| OIP5   | 0.798737 | 2.87E-115 | 6.11E-113 |

|         |          |          |          |
|---------|----------|----------|----------|
| OIT3    | -0.28239 | 6.75E-11 | 3.26E-10 |
| OLA1    | 0.536483 | 1.01E-39 | 4.62E-38 |
| OLAH    | 0.111608 | 1.13E-02 | 1.89E-02 |
| OLFM1   | -0.36372 | 1.49E-17 | 1.40E-16 |
| OLFM2   | -0.12699 | 3.89E-03 | 7.12E-03 |
| OLFM3   | 0.12905  | 3.35E-03 | 6.19E-03 |
| OLFM4   | 0.056178 | 2.03E-01 | 2.58E-01 |
| OLFML1  | -0.28372 | 5.44E-11 | 2.65E-10 |
| OLFML2A | -0.02236 | 6.13E-01 | 6.70E-01 |
| OLFML2B | 0.192679 | 1.07E-05 | 2.84E-05 |
| OLFML3  | -0.19605 | 7.40E-06 | 2.01E-05 |
| OLIG1   | -0.2631  | 1.33E-09 | 5.62E-09 |
| OLIG2   | 0.154319 | 4.40E-04 | 9.32E-04 |
| OLIG3   | 0.079823 | 7.03E-02 | 1.01E-01 |
| OLR1    | -0.13335 | 2.43E-03 | 4.58E-03 |
| OMA1    | -0.30211 | 2.50E-12 | 1.41E-11 |
| OMD     | -0.19708 | 6.61E-06 | 1.81E-05 |
| OMG     | -0.01572 | 7.22E-01 | 7.68E-01 |
| OMP     | -0.0428  | 3.32E-01 | 3.98E-01 |
| ONECUT1 | 0.064449 | 1.44E-01 | 1.91E-01 |
| ONECUT2 | 0.051622 | 2.42E-01 | 3.02E-01 |
| ONECUT3 | -0.04841 | 2.73E-01 | 3.35E-01 |
| OOEP    | 0.02023  | 6.47E-01 | 7.01E-01 |
| OPA1    | 0.501095 | 4.31E-34 | 1.42E-32 |
| OPA3    | 0.040706 | 3.57E-01 | 4.22E-01 |
| OPALIN  | 0.019753 | 6.55E-01 | 7.08E-01 |
| OPCML   | -0.24904 | 1.01E-08 | 3.86E-08 |
| OPHN1   | -0.45206 | 2.65E-27 | 5.60E-26 |
| OPLAH   | -0.15422 | 4.44E-04 | 9.39E-04 |
| OPN1LW  | 0.010786 | 8.07E-01 | 8.40E-01 |
| OPN1MW  | 0.043625 | 3.23E-01 | 3.88E-01 |
| OPN1SW  | 0.082963 | 5.99E-02 | 8.70E-02 |
| OPN3    | 0.188108 | 1.73E-05 | 4.50E-05 |
| OPN4    | 0.038632 | 3.82E-01 | 4.48E-01 |
| OPN5    | -0.08806 | 4.58E-02 | 6.81E-02 |
| OPRD1   | 0.146161 | 8.79E-04 | 1.78E-03 |
| OPRK1   | -0.08939 | 4.26E-02 | 6.37E-02 |
| OPRL1   | -0.04366 | 3.23E-01 | 3.88E-01 |
| OPRM1   | 0.041494 | 3.47E-01 | 4.13E-01 |
| OPTC    | 0.050816 | 2.50E-01 | 3.10E-01 |
| OPTN    | 0.18099  | 3.60E-05 | 8.93E-05 |
| OR10A2  | -0.01335 | 7.62E-01 | 8.02E-01 |
| OR10A3  | -0.07757 | 7.86E-02 | 1.11E-01 |
| OR10A4  | -0.03578 | 4.18E-01 | 4.84E-01 |



|         |          |          |          |
|---------|----------|----------|----------|
| OR10A5  | 0.019739 | 6.55E-01 | 7.08E-01 |
| OR10A6  | -0.05855 | 1.85E-01 | 2.38E-01 |
| OR10AD1 | -0.20044 | 4.56E-06 | 1.28E-05 |
| OR10G2  | -0.03959 | 3.70E-01 | 4.36E-01 |
| OR10G3  | 0.018657 | 6.73E-01 | 7.24E-01 |
| OR10G4  | -0.0094  | 8.32E-01 | 8.61E-01 |
| OR10G7  | -0.0243  | 5.82E-01 | 6.41E-01 |
| OR10G8  | 0.000349 | 9.94E-01 | 9.95E-01 |
| OR10H1  | 0.069536 | 1.15E-01 | 1.56E-01 |
| OR10H2  | 0.039187 | 3.75E-01 | 4.41E-01 |
| OR10H5  | 0.067148 | 1.28E-01 | 1.72E-01 |
| OR10J1  | 0.003862 | 9.30E-01 | 9.45E-01 |
| OR10J3  | 0.058372 | 1.86E-01 | 2.39E-01 |
| OR10J5  | 0.002246 | 9.59E-01 | 9.68E-01 |
| OR10P1  | -0.0393  | 3.73E-01 | 4.40E-01 |
| OR10Q1  | -0.01036 | 8.15E-01 | 8.47E-01 |
| OR10S1  | 0.08789  | 4.62E-02 | 6.86E-02 |
| OR10V1  | -0.19638 | 7.14E-06 | 1.95E-05 |
| OR10W1  | 0.053572 | 2.25E-01 | 2.83E-01 |
| OR11A1  | 0.005527 | 9.00E-01 | 9.20E-01 |
| OR11G2  | -0.0426  | 3.35E-01 | 4.00E-01 |
| OR11H12 | 0.00853  | 8.47E-01 | 8.75E-01 |
| OR11H4  | 0.021438 | 6.27E-01 | 6.83E-01 |
| OR11H6  | 0.032481 | 4.62E-01 | 5.28E-01 |
| OR12D2  | 0.06334  | 1.51E-01 | 1.99E-01 |
| OR13A1  | -0.12823 | 3.56E-03 | 6.54E-03 |
| OR13C2  | -0.10032 | 2.28E-02 | 3.61E-02 |
| OR13C3  | 0.049997 | 2.57E-01 | 3.18E-01 |
| OR13C5  | -0.05583 | 2.06E-01 | 2.61E-01 |
| OR13C9  | -0.03647 | 4.09E-01 | 4.75E-01 |
| OR13D1  | 0.040929 | 3.54E-01 | 4.20E-01 |
| OR13F1  | -0.03354 | 4.48E-01 | 5.14E-01 |
| OR13G1  | 0.036959 | 4.03E-01 | 4.69E-01 |
| OR13H1  | 0.008867 | 8.41E-01 | 8.70E-01 |
| OR13J1  | -0.14023 | 1.42E-03 | 2.79E-03 |
| OR14A16 | 0.066115 | 1.34E-01 | 1.79E-01 |
| OR14C36 | 0.024907 | 5.73E-01 | 6.32E-01 |
| OR14I1  | -0.02436 | 5.81E-01 | 6.40E-01 |
| OR1A2   | 0.062687 | 1.55E-01 | 2.04E-01 |
| OR1B1   | -0.02909 | 5.10E-01 | 5.74E-01 |
| OR1C1   | 0.053466 | 2.26E-01 | 2.84E-01 |
| OR1D2   | -0.00755 | 8.64E-01 | 8.89E-01 |
| OR1D4   | 0.068438 | 1.21E-01 | 1.63E-01 |
| OR1E1   | -0.00033 | 9.94E-01 | 9.95E-01 |

|        |          |          |          |
|--------|----------|----------|----------|
| OR1E2  | -0.05235 | 2.36E-01 | 2.95E-01 |
| OR1F1  | 0.344422 | 8.65E-16 | 6.83E-15 |
| OR1F2P | 0.180057 | 3.96E-05 | 9.76E-05 |
| OR1G1  | 0.00645  | 8.84E-01 | 9.06E-01 |
| OR1J1  | 0.052262 | 2.36E-01 | 2.95E-01 |
| OR1J2  | 0.078642 | 7.46E-02 | 1.06E-01 |
| OR1J4  | 0.067415 | 1.27E-01 | 1.70E-01 |
| OR1K1  | -0.02252 | 6.10E-01 | 6.67E-01 |
| OR1L1  | 0.011729 | 7.91E-01 | 8.27E-01 |
| OR1L3  | 0.011931 | 7.87E-01 | 8.23E-01 |
| OR1L4  | -0.01911 | 6.65E-01 | 7.17E-01 |
| OR1L6  | 0.03231  | 4.64E-01 | 5.30E-01 |
| OR1L8  | -0.23076 | 1.19E-07 | 4.02E-07 |
| OR1M1  | 0.003308 | 9.40E-01 | 9.53E-01 |
| OR1N1  | -0.08019 | 6.90E-02 | 9.90E-02 |
| OR1N2  | 0.010799 | 8.07E-01 | 8.40E-01 |
| OR1Q1  | -0.02705 | 5.40E-01 | 6.03E-01 |
| OR2A12 | 0.026372 | 5.50E-01 | 6.12E-01 |
| OR2A14 | 0.055606 | 2.08E-01 | 2.63E-01 |
| OR2A1  | -0.21205 | 1.20E-06 | 3.60E-06 |
| OR2A25 | -0.03255 | 4.61E-01 | 5.27E-01 |
| OR2A2  | -0.01432 | 7.46E-01 | 7.89E-01 |
| OR2A4  | -0.12698 | 3.90E-03 | 7.12E-03 |
| OR2A5  | -0.06154 | 1.63E-01 | 2.13E-01 |
| OR2A7  | -0.07165 | 1.04E-01 | 1.43E-01 |
| OR2A9P | -0.10482 | 1.73E-02 | 2.81E-02 |
| OR2AE1 | 0.001493 | 9.73E-01 | 9.79E-01 |
| OR2AG1 | 0.005904 | 8.94E-01 | 9.14E-01 |
| OR2AG2 | 0.053256 | 2.28E-01 | 2.86E-01 |
| OR2AK2 | -0.01422 | 7.48E-01 | 7.90E-01 |
| OR2AT4 | 0.02921  | 5.08E-01 | 5.72E-01 |
| OR2B11 | -0.04421 | 3.17E-01 | 3.81E-01 |
| OR2B2  | 0.033191 | 4.52E-01 | 5.18E-01 |
| OR2B3  | -0.01299 | 7.69E-01 | 8.08E-01 |
| OR2B6  | 0.290938 | 1.67E-11 | 8.57E-11 |
| OR2C1  | -0.18338 | 2.83E-05 | 7.10E-05 |
| OR2C3  | 0.097436 | 2.70E-02 | 4.21E-02 |
| OR2D2  | 0.002922 | 9.47E-01 | 9.59E-01 |
| OR2D3  | 0.033287 | 4.51E-01 | 5.17E-01 |
| OR2F1  | -0.03199 | 4.69E-01 | 5.35E-01 |
| OR2F2  | 0.00784  | 8.59E-01 | 8.85E-01 |
| OR2G2  | -0.08129 | 6.53E-02 | 9.41E-02 |
| OR2G6  | -0.03088 | 4.84E-01 | 5.50E-01 |
| OR2H1  | 0.042514 | 3.36E-01 | 4.01E-01 |

|        |          |          |          |
|--------|----------|----------|----------|
| OR2H2  | 0.149161 | 6.84E-04 | 1.41E-03 |
| OR2J2  | -0.04475 | 3.11E-01 | 3.75E-01 |
| OR2J3  | 0.024509 | 5.79E-01 | 6.38E-01 |
| OR2K2  | -0.15918 | 2.87E-04 | 6.26E-04 |
| OR2L13 | -0.1062  | 1.59E-02 | 2.60E-02 |
| OR2L1P | 0.014816 | 7.37E-01 | 7.81E-01 |
| OR2L2  | 0.057104 | 1.96E-01 | 2.50E-01 |
| OR2L3  | -0.01438 | 7.45E-01 | 7.88E-01 |
| OR2M3  | 0.088301 | 4.52E-02 | 6.73E-02 |
| OR2M4  | 0.062695 | 1.55E-01 | 2.04E-01 |
| OR2S2  | 0.042576 | 3.35E-01 | 4.00E-01 |
| OR2T10 | -0.13141 | 2.81E-03 | 5.25E-03 |
| OR2T2  | -0.05597 | 2.05E-01 | 2.60E-01 |
| OR2T33 | 0.075692 | 8.62E-02 | 1.21E-01 |
| OR2T34 | -0.04154 | 3.47E-01 | 4.13E-01 |
| OR2T3  | -0.10162 | 2.11E-02 | 3.36E-02 |
| OR2T4  | -0.00815 | 8.54E-01 | 8.81E-01 |
| OR2T5  | -0.02932 | 5.07E-01 | 5.71E-01 |
| OR2T6  | 0.032349 | 4.64E-01 | 5.29E-01 |
| OR2T8  | 0.061314 | 1.65E-01 | 2.15E-01 |
| OR2V2  | 0.024165 | 5.84E-01 | 6.43E-01 |
| OR2W1  | 0.004454 | 9.20E-01 | 9.36E-01 |
| OR2W3  | 0.00592  | 8.93E-01 | 9.14E-01 |
| OR2W5  | 0.038154 | 3.88E-01 | 4.54E-01 |
| OR2Z1  | 0.082006 | 6.29E-02 | 9.10E-02 |
| OR3A1  | -0.00583 | 8.95E-01 | 9.15E-01 |
| OR3A2  | 0.010793 | 8.07E-01 | 8.40E-01 |
| OR3A3  | -0.03075 | 4.86E-01 | 5.51E-01 |
| OR3A4  | -0.01126 | 7.99E-01 | 8.34E-01 |
| OR4A16 | -0.01023 | 8.17E-01 | 8.49E-01 |
| OR4A47 | 0.03165  | 4.74E-01 | 5.39E-01 |
| OR4C3  | -0.01974 | 6.55E-01 | 7.08E-01 |
| OR4C6  | 0.202089 | 3.79E-06 | 1.07E-05 |
| OR4D10 | -0.08232 | 6.19E-02 | 8.97E-02 |
| OR4D1  | 0.003141 | 9.43E-01 | 9.56E-01 |
| OR4D2  | -0.06035 | 1.71E-01 | 2.23E-01 |
| OR4D5  | 0.033663 | 4.46E-01 | 5.12E-01 |
| OR4D6  | -0.01679 | 7.04E-01 | 7.52E-01 |
| OR4E2  | -0.12352 | 5.00E-03 | 8.98E-03 |
| OR4F21 | -0.02653 | 5.48E-01 | 6.10E-01 |
| OR4F29 | -0.03091 | 4.84E-01 | 5.49E-01 |
| OR4F4  | 0.072057 | 1.02E-01 | 1.41E-01 |
| OR4F5  | -0.02139 | 6.28E-01 | 6.84E-01 |
| OR4F6  | -0.0411  | 3.52E-01 | 4.18E-01 |

|        |          |          |          |
|--------|----------|----------|----------|
| OR4K17 | -0.03167 | 4.73E-01 | 5.39E-01 |
| OR4K1  | 0.031565 | 4.75E-01 | 5.40E-01 |
| OR4M2  | 0.017265 | 6.96E-01 | 7.45E-01 |
| OR4N2  | -0.04954 | 2.62E-01 | 3.23E-01 |
| OR4N3P | 0.038969 | 3.77E-01 | 4.44E-01 |
| OR4N4  | 0.059218 | 1.80E-01 | 2.32E-01 |
| OR4X2  | 0.006621 | 8.81E-01 | 9.03E-01 |
| OR51A7 | 0.06716  | 1.28E-01 | 1.72E-01 |
| OR51B2 | 0.166139 | 1.52E-04 | 3.45E-04 |
| OR51B4 | 0.144282 | 1.03E-03 | 2.06E-03 |
| OR51B5 | 0.181797 | 3.32E-05 | 8.27E-05 |
| OR51B6 | 0.111638 | 1.12E-02 | 1.89E-02 |
| OR51E1 | 0.416078 | 5.59E-23 | 8.35E-22 |
| OR51E2 | 0.17199  | 8.75E-05 | 2.05E-04 |
| OR51F2 | 0.049162 | 2.65E-01 | 3.27E-01 |
| OR51G2 | 0.089169 | 4.31E-02 | 6.44E-02 |
| OR51I1 | -0.03772 | 3.93E-01 | 4.60E-01 |
| OR51I2 | -0.05585 | 2.06E-01 | 2.61E-01 |
| OR51M1 | 0.138726 | 1.60E-03 | 3.11E-03 |
| OR51Q1 | 0.084449 | 5.55E-02 | 8.10E-02 |
| OR51T1 | 0.055318 | 2.10E-01 | 2.66E-01 |
| OR52A1 | 0.029909 | 4.98E-01 | 5.63E-01 |
| OR52A4 | 0.110006 | 1.25E-02 | 2.08E-02 |
| OR52A5 | 0.090011 | 4.12E-02 | 6.18E-02 |
| OR52B2 | 0.012118 | 7.84E-01 | 8.21E-01 |
| OR52B4 | -0.01489 | 7.36E-01 | 7.80E-01 |
| OR52B6 | -0.18356 | 2.78E-05 | 6.99E-05 |
| OR52D1 | -0.07318 | 9.71E-02 | 1.34E-01 |
| OR52E2 | 0.154308 | 4.41E-04 | 9.33E-04 |
| OR52E4 | 0.068029 | 1.23E-01 | 1.66E-01 |
| OR52E6 | 0.112155 | 1.09E-02 | 1.83E-02 |
| OR52E8 | 0.022001 | 6.18E-01 | 6.75E-01 |
| OR52H1 | -0.05874 | 1.83E-01 | 2.36E-01 |
| OR52I1 | -0.08076 | 6.70E-02 | 9.64E-02 |
| OR52I2 | -0.03354 | 4.48E-01 | 5.14E-01 |
| OR52K1 | -0.01482 | 7.37E-01 | 7.81E-01 |
| OR52K2 | -0.12842 | 3.51E-03 | 6.46E-03 |
| OR52L1 | 0.01454  | 7.42E-01 | 7.85E-01 |
| OR52M1 | -0.05801 | 1.89E-01 | 2.42E-01 |
| OR52N1 | -0.02403 | 5.86E-01 | 6.45E-01 |
| OR52N2 | -0.0509  | 2.49E-01 | 3.09E-01 |
| OR52N4 | -0.29592 | 7.22E-12 | 3.87E-11 |
| OR52N5 | 0.049963 | 2.58E-01 | 3.19E-01 |
| OR52R1 | 0.035589 | 4.20E-01 | 4.86E-01 |

|        |          |          |          |
|--------|----------|----------|----------|
| OR52W1 | -0.0491  | 2.66E-01 | 3.28E-01 |
| OR56A1 | 0.120683 | 6.10E-03 | 1.08E-02 |
| OR56A3 | 0.200104 | 4.73E-06 | 1.32E-05 |
| OR56A4 | 0.030611 | 4.88E-01 | 5.53E-01 |
| OR56A5 | 0.037779 | 3.92E-01 | 4.59E-01 |
| OR56B1 | -0.27634 | 1.76E-10 | 8.21E-10 |
| OR56B4 | 0.021198 | 6.31E-01 | 6.87E-01 |
| OR5A1  | -0.06574 | 1.36E-01 | 1.82E-01 |
| OR5A2  | -0.06481 | 1.42E-01 | 1.88E-01 |
| OR5AC2 | -0.00959 | 8.28E-01 | 8.59E-01 |
| OR5AK2 | -0.15429 | 4.41E-04 | 9.34E-04 |
| OR5AN1 | -0.00382 | 9.31E-01 | 9.45E-01 |
| OR5AU1 | -0.09642 | 2.87E-02 | 4.44E-02 |
| OR5B12 | 0.035755 | 4.18E-01 | 4.84E-01 |
| OR5B21 | -0.02797 | 5.27E-01 | 5.90E-01 |
| OR5B2  | -0.05854 | 1.85E-01 | 2.38E-01 |
| OR5B3  | 0.019221 | 6.63E-01 | 7.16E-01 |
| OR5C1  | -0.0993  | 2.42E-02 | 3.81E-02 |
| OR5E1P | -0.08085 | 6.68E-02 | 9.61E-02 |
| OR5H1  | -0.06419 | 1.46E-01 | 1.93E-01 |
| OR5H2  | 0.018767 | 6.71E-01 | 7.22E-01 |
| OR5H6  | 0.052891 | 2.31E-01 | 2.89E-01 |
| OR5K1  | -0.21095 | 1.37E-06 | 4.07E-06 |
| OR5K2  | -0.2704  | 4.43E-10 | 1.98E-09 |
| OR5M11 | 0.060713 | 1.69E-01 | 2.20E-01 |
| OR5M1  | 0.043641 | 3.23E-01 | 3.88E-01 |
| OR5P2  | -0.13496 | 2.15E-03 | 4.09E-03 |
| OR5P3  | -0.10603 | 1.61E-02 | 2.63E-02 |
| OR5T2  | 0.016965 | 7.01E-01 | 7.49E-01 |
| OR5T3  | 0.000637 | 9.88E-01 | 9.91E-01 |
| OR5V1  | -0.00103 | 9.81E-01 | 9.86E-01 |
| OR6A2  | 0.046678 | 2.90E-01 | 3.53E-01 |
| OR6B1  | 0.004749 | 9.14E-01 | 9.32E-01 |
| OR6B2  | 0.090215 | 4.07E-02 | 6.12E-02 |
| OR6B3  | 0.001999 | 9.64E-01 | 9.72E-01 |
| OR6C2  | -0.0177  | 6.89E-01 | 7.38E-01 |
| OR6C3  | 0.029307 | 5.07E-01 | 5.71E-01 |
| OR6C6  | -0.00439 | 9.21E-01 | 9.37E-01 |
| OR6C70 | -0.01549 | 7.26E-01 | 7.71E-01 |
| OR6C75 | 0.026144 | 5.54E-01 | 6.15E-01 |
| OR6C76 | -0.07269 | 9.94E-02 | 1.37E-01 |
| OR6F1  | 0.07302  | 9.79E-02 | 1.35E-01 |
| OR6K3  | -0.15336 | 4.79E-04 | 1.01E-03 |
| OR6K6  | 0.025114 | 5.70E-01 | 6.29E-01 |

|          |          |           |           |
|----------|----------|-----------|-----------|
| OR6M1    | 0.007189 | 8.71E-01  | 8.95E-01  |
| OR6N1    | -0.10761 | 1.46E-02  | 2.40E-02  |
| OR6N2    | -0.05496 | 2.13E-01  | 2.69E-01  |
| OR6S1    | -0.07776 | 7.79E-02  | 1.10E-01  |
| OR6T1    | -0.00167 | 9.70E-01  | 9.77E-01  |
| OR6V1    | 0.038869 | 3.79E-01  | 4.45E-01  |
| OR6W1P   | 0.04109  | 3.52E-01  | 4.18E-01  |
| OR7A5    | 0.143256 | 1.11E-03  | 2.22E-03  |
| OR7C1    | -0.00162 | 9.71E-01  | 9.77E-01  |
| OR7D2    | -0.05274 | 2.32E-01  | 2.91E-01  |
| OR7D4    | -0.05653 | 2.00E-01  | 2.55E-01  |
| OR7E156P | 0.102481 | 2.00E-02  | 3.20E-02  |
| OR7E24   | -0.06372 | 1.49E-01  | 1.96E-01  |
| OR7E37P  | -0.17919 | 4.32E-05  | 1.06E-04  |
| OR7E5P   | 0.142542 | 1.18E-03  | 2.35E-03  |
| OR7E91P  | 0.177453 | 5.13E-05  | 1.25E-04  |
| OR7G2    | -0.01814 | 6.81E-01  | 7.31E-01  |
| OR7G3    | 0.008059 | 8.55E-01  | 8.82E-01  |
| OR8A1    | 0.109148 | 1.32E-02  | 2.19E-02  |
| OR8B12   | 0.041231 | 3.50E-01  | 4.16E-01  |
| OR8B2    | 0.102321 | 2.02E-02  | 3.23E-02  |
| OR8B3    | 0.060195 | 1.73E-01  | 2.24E-01  |
| OR8B4    | 0.046184 | 2.96E-01  | 3.59E-01  |
| OR8D1    | 0.09177  | 3.73E-02  | 5.65E-02  |
| OR8D2    | 0.135651 | 2.03E-03  | 3.89E-03  |
| OR8G2    | 0.032555 | 4.61E-01  | 5.27E-01  |
| OR8G5    | 0.079642 | 7.09E-02  | 1.01E-01  |
| OR8K3    | 0.029422 | 5.05E-01  | 5.70E-01  |
| OR8S1    | 0.13555  | 2.05E-03  | 3.92E-03  |
| OR9A2    | 0.046374 | 2.94E-01  | 3.56E-01  |
| OR9A4    | 0.018002 | 6.84E-01  | 7.33E-01  |
| OR9G4    | -0.11714 | 7.79E-03  | 1.35E-02  |
| OR9G9    | 0.005205 | 9.06E-01  | 9.25E-01  |
| OR9K2    | 0.037047 | 4.01E-01  | 4.68E-01  |
| OR9Q1    | 0.048695 | 2.70E-01  | 3.32E-01  |
| ORAI1    | 0.0361   | 4.14E-01  | 4.80E-01  |
| ORAI2    | 0.09644  | 2.86E-02  | 4.44E-02  |
| ORAI3    | -0.17677 | 5.49E-05  | 1.33E-04  |
| ORAOV1   | -0.02325 | 5.99E-01  | 6.56E-01  |
| ORC1L    | 0.843125 | 2.48E-140 | 9.93E-138 |
| ORC2L    | 0.319432 | 1.11E-13  | 7.17E-13  |
| ORC3L    | 0.183086 | 2.91E-05  | 7.31E-05  |
| ORC4L    | 0.248264 | 1.13E-08  | 4.27E-08  |
| ORC5L    | 0.435362 | 3.12E-25  | 5.61E-24  |

|          |          |           |           |
|----------|----------|-----------|-----------|
| ORC6L    | 0.7904   | 2.93E-111 | 5.80E-109 |
| ORM1     | -0.30639 | 1.18E-12  | 6.86E-12  |
| ORM2     | -0.30427 | 1.71E-12  | 9.83E-12  |
| ORMDL1   | -0.06383 | 1.48E-01  | 1.95E-01  |
| ORMDL2   | 0.212946 | 1.08E-06  | 3.25E-06  |
| ORMDL3   | -0.45886 | 3.51E-28  | 7.93E-27  |
| OS9      | -0.1925  | 1.09E-05  | 2.89E-05  |
| OSBP2    | -0.11369 | 9.82E-03  | 1.67E-02  |
| OSBPL10  | 0.116613 | 8.07E-03  | 1.39E-02  |
| OSBPL11  | 0.087149 | 4.81E-02  | 7.11E-02  |
| OSBPL1A  | -0.24067 | 3.20E-08  | 1.15E-07  |
| OSBPL2   | -0.18222 | 3.18E-05  | 7.94E-05  |
| OSBPL3   | 0.141759 | 1.26E-03  | 2.49E-03  |
| OSBPL5   | -0.22349 | 2.98E-07  | 9.67E-07  |
| OSBPL6   | -0.18253 | 3.08E-05  | 7.71E-05  |
| OSBPL7   | -0.28564 | 3.99E-11  | 1.96E-10  |
| OSBPL8   | 0.209142 | 1.69E-06  | 4.97E-06  |
| OSBPL9   | -0.16313 | 2.01E-04  | 4.48E-04  |
| OSBP     | -0.05713 | 1.96E-01  | 2.50E-01  |
| OSCAR    | -0.1358  | 2.01E-03  | 3.85E-03  |
| OSCP1    | -0.37949 | 4.36E-19  | 4.68E-18  |
| OSGEPL1  | 0.069788 | 1.14E-01  | 1.54E-01  |
| OSGEP    | -0.07229 | 1.01E-01  | 1.39E-01  |
| OSGIN1   | 0.034226 | 4.38E-01  | 5.05E-01  |
| OSGIN2   | 0.320546 | 9.04E-14  | 5.88E-13  |
| OSMR     | 0.059863 | 1.75E-01  | 2.27E-01  |
| OSM      | 0.09581  | 2.97E-02  | 4.59E-02  |
| OSR1     | -0.39729 | 6.41E-21  | 8.11E-20  |
| OSR2     | 0.148559 | 7.20E-04  | 1.48E-03  |
| OST4     | 0.158383 | 3.08E-04  | 6.69E-04  |
| OSTBETA  | -0.08585 | 5.15E-02  | 7.58E-02  |
| OSTCL    | 0.115417 | 8.75E-03  | 1.50E-02  |
| OSTC     | 0.302457 | 2.35E-12  | 1.33E-11  |
| OSTF1    | -0.00588 | 8.94E-01  | 9.14E-01  |
| OSTM1    | 0.086796 | 4.90E-02  | 7.24E-02  |
| OSTN     | -0.0259  | 5.58E-01  | 6.19E-01  |
| OSTalpha | 0.068904 | 1.18E-01  | 1.60E-01  |
| OTC      | -0.4037  | 1.32E-21  | 1.75E-20  |
| OTOA     | -0.23368 | 8.12E-08  | 2.80E-07  |
| OTOF     | 0.178689 | 4.54E-05  | 1.11E-04  |
| OTOL1    | 0.026185 | 5.53E-01  | 6.15E-01  |
| OTOP1    | 0.018183 | 6.81E-01  | 7.31E-01  |
| OTOP2    | 0.181241 | 3.51E-05  | 8.72E-05  |
| OTOP3    | 0.17003  | 1.06E-04  | 2.45E-04  |

|        |          |          |          |
|--------|----------|----------|----------|
| OTOR   | 0.030238 | 4.94E-01 | 5.58E-01 |
| OTOS   | 0.143874 | 1.06E-03 | 2.12E-03 |
| OTP    | 0.191456 | 1.22E-05 | 3.22E-05 |
| OTUB1  | 0.118386 | 7.15E-03 | 1.25E-02 |
| OTUB2  | 0.318231 | 1.39E-13 | 8.87E-13 |
| OTUD1  | -0.23404 | 7.73E-08 | 2.67E-07 |
| OTUD3  | -0.19711 | 6.59E-06 | 1.81E-05 |
| OTUD4  | -0.00519 | 9.06E-01 | 9.25E-01 |
| OTUD5  | -0.2196  | 4.83E-07 | 1.52E-06 |
| OTUD6A | 0.054012 | 2.21E-01 | 2.79E-01 |
| OTUD6B | 0.357691 | 5.46E-17 | 4.87E-16 |
| OTUD7A | -0.341   | 1.73E-15 | 1.31E-14 |
| OTUD7B | -0.17787 | 4.93E-05 | 1.20E-04 |
| OTX1   | 0.263752 | 1.21E-09 | 5.12E-09 |
| OTX2   | 0.184648 | 2.48E-05 | 6.29E-05 |
| OVCA2  | 0.12772  | 3.69E-03 | 6.77E-03 |
| OVCH1  | -0.26035 | 2.00E-09 | 8.27E-09 |
| OVCH2  | -0.23022 | 1.27E-07 | 4.29E-07 |
| OVGP1  | -0.40523 | 8.96E-22 | 1.21E-20 |
| OVOL1  | 0.067621 | 1.25E-01 | 1.69E-01 |
| OVOL2  | -0.12191 | 5.60E-03 | 9.97E-03 |
| OXA1L  | -0.03331 | 4.51E-01 | 5.17E-01 |
| OXCT1  | 0.170055 | 1.05E-04 | 2.45E-04 |
| OXCT2  | -0.09438 | 3.23E-02 | 4.95E-02 |
| OXER1  | -0.13551 | 2.06E-03 | 3.93E-03 |
| OXGR1  | 0.071453 | 1.05E-01 | 1.44E-01 |
| OXNAD1 | 0.155068 | 4.13E-04 | 8.77E-04 |
| OXR1   | -0.12473 | 4.59E-03 | 8.29E-03 |
| OXSM   | 0.055929 | 2.05E-01 | 2.61E-01 |
| OXSR1  | 0.153762 | 4.62E-04 | 9.75E-04 |
| OXTR   | 0.050073 | 2.57E-01 | 3.18E-01 |
| OXT    | -0.1011  | 2.18E-02 | 3.46E-02 |
| P2RX1  | -0.20369 | 3.16E-06 | 9.03E-06 |
| P2RX2  | -0.35008 | 2.71E-16 | 2.24E-15 |
| P2RX3  | -0.03088 | 4.84E-01 | 5.49E-01 |
| P2RX4  | -0.04443 | 3.14E-01 | 3.79E-01 |
| P2RX5  | 0.1212   | 5.89E-03 | 1.04E-02 |
| P2RX6  | -0.13238 | 2.61E-03 | 4.91E-03 |
| P2RX7  | -0.05462 | 2.16E-01 | 2.73E-01 |
| P2RY10 | -0.02581 | 5.59E-01 | 6.20E-01 |
| P2RY11 | -0.06573 | 1.36E-01 | 1.82E-01 |
| P2RY12 | -0.29831 | 4.80E-12 | 2.63E-11 |
| P2RY13 | -0.19537 | 7.97E-06 | 2.16E-05 |
| P2RY14 | -0.26394 | 1.18E-09 | 4.99E-09 |



|           |          |          |          |
|-----------|----------|----------|----------|
| P2RY1     | 0.03075  | 4.86E-01 | 5.51E-01 |
| P2RY2     | -0.20193 | 3.86E-06 | 1.09E-05 |
| P2RY4     | 0.075792 | 8.57E-02 | 1.20E-01 |
| P2RY6     | 0.232553 | 9.40E-08 | 3.22E-07 |
| P2RY8     | -0.21653 | 7.02E-07 | 2.17E-06 |
| P4HA1     | 0.348547 | 3.72E-16 | 3.03E-15 |
| P4HA2     | 0.107717 | 1.45E-02 | 2.38E-02 |
| P4HA3     | 0.159816 | 2.71E-04 | 5.94E-04 |
| P4HB      | 0.101708 | 2.10E-02 | 3.34E-02 |
| P4HTM     | -0.33361 | 7.47E-15 | 5.37E-14 |
| P704P     | 0.129559 | 3.22E-03 | 5.98E-03 |
| PA2G4P4   | 0.376079 | 9.53E-19 | 9.89E-18 |
| PA2G4     | 0.530237 | 1.12E-38 | 4.75E-37 |
| PAAF1     | 0.039433 | 3.72E-01 | 4.38E-01 |
| PABPC1L2A | -0.14713 | 8.11E-04 | 1.65E-03 |
| PABPC1L2B | -0.19969 | 4.95E-06 | 1.38E-05 |
| PABPC1L   | -0.14521 | 9.50E-04 | 1.92E-03 |
| PABPC1P2  | 0.051947 | 2.39E-01 | 2.99E-01 |
| PABPC1    | 0.099334 | 2.42E-02 | 3.81E-02 |
| PABPC3    | 0.121444 | 5.79E-03 | 1.03E-02 |
| PABPC4L   | 0.117031 | 7.85E-03 | 1.36E-02 |
| PABPC4    | -0.05968 | 1.76E-01 | 2.28E-01 |
| PABPC5    | -0.13404 | 2.30E-03 | 4.36E-03 |
| PABPN1L   | 0.039313 | 3.73E-01 | 4.39E-01 |
| PABPN1    | 0.055831 | 2.06E-01 | 2.61E-01 |
| PACRGL    | 0.166833 | 1.43E-04 | 3.25E-04 |
| PACRG     | -0.27428 | 2.43E-10 | 1.12E-09 |
| PACS1     | 0.129735 | 3.18E-03 | 5.90E-03 |
| PACS2     | -0.07497 | 8.92E-02 | 1.24E-01 |
| PACSIN1   | 0.24921  | 9.90E-09 | 3.78E-08 |
| PACSIN2   | -0.22532 | 2.37E-07 | 7.77E-07 |
| PACSIN3   | -0.15147 | 5.63E-04 | 1.17E-03 |
| PADI1     | 0.181682 | 3.36E-05 | 8.36E-05 |
| PADI2     | -0.06441 | 1.44E-01 | 1.91E-01 |
| PADI3     | 0.188533 | 1.66E-05 | 4.31E-05 |
| PADI4     | -0.02286 | 6.05E-01 | 6.62E-01 |
| PADI6     | 0.040583 | 3.58E-01 | 4.24E-01 |
| PAEP      | 0.104673 | 1.75E-02 | 2.84E-02 |
| PAF1      | 0.061104 | 1.66E-01 | 2.17E-01 |
| PAFAH1B1  | -0.23506 | 6.77E-08 | 2.35E-07 |
| PAFAH1B2  | 0.21459  | 8.86E-07 | 2.70E-06 |
| PAFAH1B3  | 0.357124 | 6.16E-17 | 5.46E-16 |
| PAFAH2    | -0.15283 | 5.01E-04 | 1.05E-03 |
| PAG1      | -0.21904 | 5.18E-07 | 1.63E-06 |

|             |          |          |          |
|-------------|----------|----------|----------|
| PAGE1       | 0.199714 | 4.94E-06 | 1.38E-05 |
| PAGE2B      | 0.160957 | 2.45E-04 | 5.39E-04 |
| PAGE2       | 0.188374 | 1.68E-05 | 4.38E-05 |
| PAGE3       | 0.053511 | 2.25E-01 | 2.83E-01 |
| PAGE4       | 0.106092 | 1.60E-02 | 2.62E-02 |
| PAGE5       | 0.155004 | 4.15E-04 | 8.82E-04 |
| PAH         | 0.158778 | 2.98E-04 | 6.47E-04 |
| PAICS       | 0.598018 | 2.93E-51 | 2.04E-49 |
| PAIP1       | 0.313147 | 3.52E-13 | 2.16E-12 |
| PAIP2B      | -0.191   | 1.28E-05 | 3.37E-05 |
| PAIP2       | -0.04678 | 2.89E-01 | 3.52E-01 |
| PAK1IP1     | 0.476063 | 1.72E-30 | 4.58E-29 |
| PAK1        | 0.207052 | 2.15E-06 | 6.25E-06 |
| PAK2        | 0.424062 | 6.79E-24 | 1.10E-22 |
| PAK3        | -0.21847 | 5.54E-07 | 1.74E-06 |
| PAK4        | 0.192738 | 1.06E-05 | 2.82E-05 |
| PAK6        | -0.13896 | 1.57E-03 | 3.06E-03 |
| PAK7        | -0.0964  | 2.87E-02 | 4.45E-02 |
| PALB2       | 0.282669 | 6.45E-11 | 3.12E-10 |
| PALLD       | 0.170446 | 1.01E-04 | 2.36E-04 |
| PALM2-AKAP2 | -0.00638 | 8.85E-01 | 9.07E-01 |
| PALM2       | -0.01362 | 7.58E-01 | 7.98E-01 |
| PALM3       | -0.2771  | 1.56E-10 | 7.31E-10 |
| PALMD       | -0.40489 | 9.76E-22 | 1.31E-20 |
| PALM        | -0.28099 | 8.45E-11 | 4.05E-10 |
| PAMR1       | -0.22821 | 1.65E-07 | 5.49E-07 |
| PAM         | -0.30275 | 2.23E-12 | 1.27E-11 |
| PAN2        | -0.2151  | 8.34E-07 | 2.55E-06 |
| PAN3        | -0.23369 | 8.10E-08 | 2.79E-07 |
| PANK1       | -0.01194 | 7.87E-01 | 8.23E-01 |
| PANK2       | 0.08786  | 4.63E-02 | 6.87E-02 |
| PANK3       | 0.287711 | 2.84E-11 | 1.43E-10 |
| PANK4       | -0.00336 | 9.39E-01 | 9.53E-01 |
| PANX1       | 0.27629  | 1.78E-10 | 8.27E-10 |
| PANX2       | 0.011021 | 8.03E-01 | 8.37E-01 |
| PANX3       | 0.094579 | 3.19E-02 | 4.89E-02 |
| PAOX        | -0.23701 | 5.23E-08 | 1.84E-07 |
| PAPD4       | -0.11997 | 6.41E-03 | 1.13E-02 |
| PAPD5       | -0.15194 | 5.41E-04 | 1.13E-03 |
| PAPD7       | 0.077762 | 7.79E-02 | 1.10E-01 |
| PAPLN       | -0.29279 | 1.22E-11 | 6.38E-11 |
| PAPL        | 0.26174  | 1.63E-09 | 6.80E-09 |
| PAPOLA      | 0.198063 | 5.93E-06 | 1.64E-05 |
| PAPOLB      | -0.01402 | 7.51E-01 | 7.93E-01 |

|        |          |          |          |
|--------|----------|----------|----------|
| PAPOLG | 0.167145 | 1.39E-04 | 3.16E-04 |
| PAPPA2 | -0.21297 | 1.07E-06 | 3.24E-06 |
| PAPPA  | -0.24586 | 1.58E-08 | 5.87E-08 |
| PAPSS1 | -0.06703 | 1.29E-01 | 1.73E-01 |
| PAPSS2 | -0.15687 | 3.52E-04 | 7.58E-04 |
| PAQR3  | 0.285097 | 4.36E-11 | 2.14E-10 |
| PAQR4  | 0.296887 | 6.12E-12 | 3.31E-11 |
| PAQR5  | -0.1103  | 1.23E-02 | 2.05E-02 |
| PAQR6  | 0.049457 | 2.63E-01 | 3.24E-01 |
| PAQR7  | -0.0645  | 1.44E-01 | 1.90E-01 |
| PAQR8  | -0.20997 | 1.53E-06 | 4.53E-06 |
| PAQR9  | 0.314921 | 2.55E-13 | 1.59E-12 |
| PAR-SN | -0.27717 | 1.55E-10 | 7.24E-10 |
| PAR1   | -0.31242 | 4.01E-13 | 2.45E-12 |
| PAR4   | -0.0203  | 6.46E-01 | 7.00E-01 |
| PAR5   | -0.19161 | 1.20E-05 | 3.17E-05 |
| PARD3B | -0.28958 | 2.09E-11 | 1.06E-10 |
| PARD3  | 0.195388 | 7.95E-06 | 2.16E-05 |
| PARD6A | -0.04835 | 2.73E-01 | 3.35E-01 |
| PARD6B | -0.22448 | 2.64E-07 | 8.61E-07 |
| PARD6G | 0.116561 | 8.10E-03 | 1.40E-02 |
| PARG   | 0.179606 | 4.14E-05 | 1.02E-04 |
| PARK2  | -0.26075 | 1.89E-09 | 7.82E-09 |
| PARK7  | 0.08929  | 4.28E-02 | 6.40E-02 |
| PARL   | 0.357743 | 5.40E-17 | 4.82E-16 |
| PARM1  | -0.50196 | 3.20E-34 | 1.06E-32 |
| PARN   | -0.40629 | 6.87E-22 | 9.36E-21 |
| PARP10 | -0.18396 | 2.66E-05 | 6.72E-05 |
| PARP11 | -0.21245 | 1.14E-06 | 3.44E-06 |
| PARP12 | 0.25788  | 2.87E-09 | 1.16E-08 |
| PARP14 | -0.04371 | 3.22E-01 | 3.87E-01 |
| PARP15 | -0.26026 | 2.03E-09 | 8.37E-09 |
| PARP16 | -0.27471 | 2.28E-10 | 1.05E-09 |
| PARP1  | 0.280243 | 9.52E-11 | 4.53E-10 |
| PARP2  | 0.435241 | 3.22E-25 | 5.79E-24 |
| PARP3  | -0.35684 | 6.55E-17 | 5.78E-16 |
| PARP4  | -0.22655 | 2.03E-07 | 6.71E-07 |
| PARP6  | -0.08731 | 4.77E-02 | 7.06E-02 |
| PARP8  | -0.16951 | 1.11E-04 | 2.57E-04 |
| PARP9  | 0.223408 | 3.02E-07 | 9.76E-07 |
| PARS2  | 0.084125 | 5.64E-02 | 8.23E-02 |
| PART1  | -0.09172 | 3.75E-02 | 5.67E-02 |
| PARVA  | -0.31704 | 1.73E-13 | 1.10E-12 |
| PARVB  | 0.202086 | 3.79E-06 | 1.07E-05 |

|         |          |           |           |
|---------|----------|-----------|-----------|
| PARVG   | -0.19586 | 7.56E-06  | 2.05E-05  |
| PASD1   | 0.128187 | 3.57E-03  | 6.56E-03  |
| PASK    | 0.074179 | 9.26E-02  | 1.29E-01  |
| PATE1   | 0.024081 | 5.86E-01  | 6.44E-01  |
| PATE2   | 0.291381 | 1.55E-11  | 7.99E-11  |
| PATE3   | -0.00926 | 8.34E-01  | 8.63E-01  |
| PATE4   | 0.185167 | 2.35E-05  | 5.99E-05  |
| PATL1   | 0.467911 | 2.22E-29  | 5.50E-28  |
| PATL2   | -0.13787 | 1.71E-03  | 3.31E-03  |
| PATZ1   | -0.12623 | 4.11E-03  | 7.49E-03  |
| PAWR    | 0.496094 | 2.39E-33  | 7.48E-32  |
| PAX1    | -0.04754 | 2.82E-01  | 3.44E-01  |
| PAX2    | 0.086668 | 4.93E-02  | 7.28E-02  |
| PAX3    | 0.111335 | 1.15E-02  | 1.93E-02  |
| PAX4    | 0.047252 | 2.84E-01  | 3.47E-01  |
| PAX5    | -0.09121 | 3.85E-02  | 5.81E-02  |
| PAX6    | -0.18222 | 3.18E-05  | 7.94E-05  |
| PAX7    | -0.30551 | 1.38E-12  | 7.97E-12  |
| PAX8    | 0.046773 | 2.89E-01  | 3.52E-01  |
| PAX9    | 0.221729 | 3.72E-07  | 1.19E-06  |
| PAXIP1  | 0.267414 | 6.98E-10  | 3.04E-09  |
| PBK     | 0.799453 | 1.27E-115 | 2.74E-113 |
| PBLD    | -0.29934 | 4.03E-12  | 2.22E-11  |
| PBOV1   | -0.25153 | 7.14E-09  | 2.77E-08  |
| PBRM1   | -0.11101 | 1.17E-02  | 1.96E-02  |
| PBX1    | -0.1807  | 3.71E-05  | 9.18E-05  |
| PBX2    | -0.21456 | 8.89E-07  | 2.71E-06  |
| PBX3    | -0.02663 | 5.47E-01  | 6.09E-01  |
| PBX4    | -0.12908 | 3.34E-03  | 6.17E-03  |
| PBXIP1  | -0.61818 | 1.31E-55  | 1.01E-53  |
| PCA3    | -0.0796  | 7.11E-02  | 1.02E-01  |
| PCBD1   | -0.1466  | 8.47E-04  | 1.72E-03  |
| PCBD2   | -0.37345 | 1.73E-18  | 1.76E-17  |
| PCBP1   | 0.221923 | 3.63E-07  | 1.16E-06  |
| PCBP2   | 0.312698 | 3.82E-13  | 2.34E-12  |
| PCBP3   | -0.17144 | 9.23E-05  | 2.16E-04  |
| PCBP4   | -0.06053 | 1.70E-01  | 2.21E-01  |
| PCCA    | -0.323   | 5.71E-14  | 3.79E-13  |
| PCCB    | 0.203638 | 3.18E-06  | 9.08E-06  |
| PCDH10  | -0.17515 | 6.44E-05  | 1.54E-04  |
| PCDH11X | -0.30382 | 1.85E-12  | 1.06E-11  |
| PCDH11Y | -0.18663 | 2.02E-05  | 5.19E-05  |
| PCDH12  | -0.18257 | 3.07E-05  | 7.68E-05  |
| PCDH15  | -0.37941 | 4.45E-19  | 4.76E-18  |

|          |          |          |          |
|----------|----------|----------|----------|
| PCDH17   | -0.15972 | 2.74E-04 | 5.99E-04 |
| PCDH18   | -0.09835 | 2.56E-02 | 4.01E-02 |
| PCDH19   | -0.05774 | 1.91E-01 | 2.45E-01 |
| PCDH1    | -0.22802 | 1.69E-07 | 5.61E-07 |
| PCDH20   | -0.42263 | 9.96E-24 | 1.60E-22 |
| PCDH7    | 0.234718 | 7.08E-08 | 2.45E-07 |
| PCDH8    | -0.04721 | 2.85E-01 | 3.47E-01 |
| PCDH9    | -0.20205 | 3.80E-06 | 1.08E-05 |
| PCDHA10  | -0.2433  | 2.24E-08 | 8.21E-08 |
| PCDHA11  | -0.09641 | 2.87E-02 | 4.45E-02 |
| PCDHA12  | -0.17385 | 7.31E-05 | 1.74E-04 |
| PCDHA13  | -0.09077 | 3.95E-02 | 5.95E-02 |
| PCDHA1   | 0.192917 | 1.04E-05 | 2.77E-05 |
| PCDHA2   | 0.038465 | 3.84E-01 | 4.50E-01 |
| PCDHA3   | -0.15975 | 2.73E-04 | 5.97E-04 |
| PCDHA4   | -0.01796 | 6.84E-01 | 7.34E-01 |
| PCDHA5   | 0.054145 | 2.20E-01 | 2.77E-01 |
| PCDHA6   | -0.04043 | 3.60E-01 | 4.26E-01 |
| PCDHA7   | -0.02399 | 5.87E-01 | 6.46E-01 |
| PCDHA8   | -0.12184 | 5.63E-03 | 1.00E-02 |
| PCDHA9   | -0.06184 | 1.61E-01 | 2.11E-01 |
| PCDHAC1  | -0.02685 | 5.43E-01 | 6.05E-01 |
| PCDHAC2  | -0.16155 | 2.32E-04 | 5.13E-04 |
| PCDHB10  | 0.01994  | 6.52E-01 | 7.05E-01 |
| PCDHB11  | -0.02783 | 5.29E-01 | 5.92E-01 |
| PCDHB12  | -0.11973 | 6.52E-03 | 1.15E-02 |
| PCDHB13  | 0.067159 | 1.28E-01 | 1.72E-01 |
| PCDHB14  | -0.0137  | 7.56E-01 | 7.97E-01 |
| PCDHB15  | -0.12491 | 4.53E-03 | 8.19E-03 |
| PCDHB16  | -0.02629 | 5.52E-01 | 6.13E-01 |
| PCDHB17  | 0.145837 | 9.02E-04 | 1.83E-03 |
| PCDHB18  | -0.06982 | 1.14E-01 | 1.54E-01 |
| PCDHB19P | -0.0073  | 8.69E-01 | 8.93E-01 |
| PCDHB1   | -0.14631 | 8.68E-04 | 1.76E-03 |
| PCDHB2   | 0.17453  | 6.84E-05 | 1.63E-04 |
| PCDHB3   | -0.07662 | 8.24E-02 | 1.16E-01 |
| PCDHB4   | -0.26135 | 1.73E-09 | 7.19E-09 |
| PCDHB5   | -0.0007  | 9.87E-01 | 9.90E-01 |
| PCDHB6   | 0.040547 | 3.58E-01 | 4.25E-01 |
| PCDHB7   | -0.13785 | 1.71E-03 | 3.32E-03 |
| PCDHB8   | 0.216111 | 7.38E-07 | 2.27E-06 |
| PCDHB9   | 0.059688 | 1.76E-01 | 2.28E-01 |
| PCDHGA10 | -0.11769 | 7.51E-03 | 1.30E-02 |
| PCDHGA11 | -0.02798 | 5.26E-01 | 5.90E-01 |

|          |          |          |          |
|----------|----------|----------|----------|
| PCDHGA12 | -0.16475 | 1.73E-04 | 3.90E-04 |
| PCDHGA1  | 0.194545 | 8.72E-06 | 2.35E-05 |
| PCDHGA2  | -0.06707 | 1.29E-01 | 1.72E-01 |
| PCDHGA3  | -0.10376 | 1.85E-02 | 2.98E-02 |
| PCDHGA4  | -0.0455  | 3.03E-01 | 3.66E-01 |
| PCDHGA5  | -0.14602 | 8.89E-04 | 1.80E-03 |
| PCDHGA6  | -0.1624  | 2.15E-04 | 4.78E-04 |
| PCDHGA7  | -0.09451 | 3.20E-02 | 4.91E-02 |
| PCDHGA8  | 0.045654 | 3.01E-01 | 3.65E-01 |
| PCDHGA9  | -0.15677 | 3.56E-04 | 7.65E-04 |
| PCDHGB1  | 0.158434 | 3.07E-04 | 6.66E-04 |
| PCDHGB2  | -0.10561 | 1.65E-02 | 2.69E-02 |
| PCDHGB3  | -0.06698 | 1.29E-01 | 1.73E-01 |
| PCDHGB4  | 0.05848  | 1.85E-01 | 2.38E-01 |
| PCDHGB5  | 0.015288 | 7.29E-01 | 7.74E-01 |
| PCDHGB6  | -0.18209 | 3.23E-05 | 8.04E-05 |
| PCDHGB7  | -0.27035 | 4.46E-10 | 1.99E-09 |
| PCDHGB8P | -0.03817 | 3.87E-01 | 4.54E-01 |
| PCDHGC3  | -0.22921 | 1.45E-07 | 4.86E-07 |
| PCDHGC4  | -0.07583 | 8.56E-02 | 1.20E-01 |
| PCDHGC5  | 0.004669 | 9.16E-01 | 9.33E-01 |
| PCDP1    | -0.568   | 2.51E-45 | 1.48E-43 |
| PCF11    | -0.24282 | 2.40E-08 | 8.74E-08 |
| PCGEM1   | 0.070059 | 1.12E-01 | 1.53E-01 |
| PCGF1    | 0.089382 | 4.26E-02 | 6.38E-02 |
| PCGF2    | 0.006287 | 8.87E-01 | 9.08E-01 |
| PCGF3    | -0.01065 | 8.09E-01 | 8.42E-01 |
| PCGF5    | 0.020992 | 6.35E-01 | 6.90E-01 |
| PCGF6    | 0.412583 | 1.38E-22 | 2.00E-21 |
| PCID2    | 0.050301 | 2.55E-01 | 3.15E-01 |
| PCIF1    | -0.05471 | 2.15E-01 | 2.72E-01 |
| PCK1     | 0.089423 | 4.25E-02 | 6.36E-02 |
| PCK2     | 0.056906 | 1.97E-01 | 2.52E-01 |
| PCLO     | -0.00446 | 9.20E-01 | 9.36E-01 |
| PCM1     | -0.13528 | 2.09E-03 | 3.99E-03 |
| PCMT1    | 0.33578  | 4.88E-15 | 3.57E-14 |
| PCMTD1   | -0.28623 | 3.62E-11 | 1.80E-10 |
| PCMTD2   | -0.26625 | 8.33E-10 | 3.59E-09 |
| PCNAP1   | -0.09231 | 3.62E-02 | 5.50E-02 |
| PCNA     | 0.624015 | 6.28E-57 | 5.08E-55 |
| PCNP     | 0.207354 | 2.08E-06 | 6.05E-06 |
| PCNT     | -0.07643 | 8.31E-02 | 1.17E-01 |
| PCNXL2   | 0.026853 | 5.43E-01 | 6.05E-01 |
| PCNXL3   | 0.135189 | 2.11E-03 | 4.02E-03 |

|          |          |          |          |
|----------|----------|----------|----------|
| PCNX     | -0.15225 | 5.27E-04 | 1.10E-03 |
| PCOLCE2  | 0.044808 | 3.10E-01 | 3.74E-01 |
| PCOLCE   | 0.010178 | 8.18E-01 | 8.50E-01 |
| PCOTH    | -0.24237 | 2.54E-08 | 9.26E-08 |
| PCP2     | -0.249   | 1.02E-08 | 3.88E-08 |
| PCP4L1   | -0.3336  | 7.49E-15 | 5.38E-14 |
| PCP4     | 0.028205 | 5.23E-01 | 5.87E-01 |
| PCSK1N   | -0.09806 | 2.61E-02 | 4.07E-02 |
| PCSK1    | 0.286688 | 3.36E-11 | 1.67E-10 |
| PCSK2    | -0.4087  | 3.73E-22 | 5.21E-21 |
| PCSK4    | -0.25586 | 3.85E-09 | 1.54E-08 |
| PCSK5    | -0.26702 | 7.41E-10 | 3.22E-09 |
| PCSK6    | -0.09874 | 2.50E-02 | 3.93E-02 |
| PCSK7    | -0.17629 | 5.76E-05 | 1.39E-04 |
| PCSK9    | -0.08702 | 4.84E-02 | 7.16E-02 |
| PCTP     | 0.00306  | 9.45E-01 | 9.57E-01 |
| PCYOX1L  | -0.01064 | 8.10E-01 | 8.43E-01 |
| PCYOX1   | -0.28736 | 3.01E-11 | 1.51E-10 |
| PCYT1A   | 0.342628 | 1.24E-15 | 9.63E-15 |
| PCYT1B   | -0.15349 | 4.73E-04 | 9.97E-04 |
| PCYT2    | -0.04263 | 3.34E-01 | 4.00E-01 |
| PC       | -0.1473  | 7.99E-04 | 1.63E-03 |
| PDAP1    | 0.346853 | 5.27E-16 | 4.25E-15 |
| PDCD10   | 0.409496 | 3.05E-22 | 4.28E-21 |
| PDCD11   | 0.20504  | 2.71E-06 | 7.79E-06 |
| PDCD1LG2 | 0.178737 | 4.52E-05 | 1.11E-04 |
| PDCD1    | 0.155685 | 3.91E-04 | 8.35E-04 |
| PDCD2L   | 0.313406 | 3.36E-13 | 2.07E-12 |
| PDCD2    | 0.285329 | 4.19E-11 | 2.06E-10 |
| PDCD4    | -0.36822 | 5.55E-18 | 5.38E-17 |
| PDCD5    | 0.422585 | 1.01E-23 | 1.61E-22 |
| PDCD6IP  | -0.12346 | 5.02E-03 | 9.01E-03 |
| PDCD6    | 0.176958 | 5.39E-05 | 1.31E-04 |
| PDCD7    | -0.01232 | 7.80E-01 | 8.18E-01 |
| PDCL2    | 0.087533 | 4.71E-02 | 6.98E-02 |
| PDCL3    | 0.389791 | 3.92E-20 | 4.63E-19 |
| PDCL     | 0.101598 | 2.11E-02 | 3.36E-02 |
| PDC      | 0.020299 | 6.46E-01 | 7.00E-01 |
| PDDC1    | -0.22923 | 1.44E-07 | 4.85E-07 |
| PDE10A   | 0.193679 | 9.57E-06 | 2.57E-05 |
| PDE11A   | -0.02177 | 6.22E-01 | 6.78E-01 |
| PDE12    | 0.068132 | 1.23E-01 | 1.65E-01 |
| PDE1A    | -0.26705 | 7.38E-10 | 3.21E-09 |
| PDE1B    | -0.17571 | 6.09E-05 | 1.46E-04 |

|         |          |          |          |
|---------|----------|----------|----------|
| PDE1C   | -0.09621 | 2.90E-02 | 4.49E-02 |
| PDE2A   | -0.21306 | 1.06E-06 | 3.21E-06 |
| PDE3A   | 0.005484 | 9.01E-01 | 9.20E-01 |
| PDE3B   | -0.16993 | 1.07E-04 | 2.47E-04 |
| PDE4A   | -0.33541 | 5.25E-15 | 3.83E-14 |
| PDE4B   | -0.08623 | 5.05E-02 | 7.44E-02 |
| PDE4C   | -0.35481 | 1.01E-16 | 8.71E-16 |
| PDE4DIP | -0.14886 | 7.02E-04 | 1.44E-03 |
| PDE4D   | -0.26491 | 1.02E-09 | 4.35E-09 |
| PDE5A   | -0.19787 | 6.06E-06 | 1.67E-05 |
| PDE6A   | 0.207666 | 2.00E-06 | 5.85E-06 |
| PDE6B   | -0.18736 | 1.87E-05 | 4.84E-05 |
| PDE6C   | -0.06603 | 1.35E-01 | 1.80E-01 |
| PDE6D   | 0.260689 | 1.90E-09 | 7.88E-09 |
| PDE6G   | -0.00327 | 9.41E-01 | 9.54E-01 |
| PDE6H   | -0.02857 | 5.18E-01 | 5.82E-01 |
| PDE7A   | 0.033299 | 4.51E-01 | 5.17E-01 |
| PDE7B   | -0.33318 | 8.12E-15 | 5.80E-14 |
| PDE8A   | -0.31339 | 3.37E-13 | 2.08E-12 |
| PDE8B   | -0.35033 | 2.57E-16 | 2.14E-15 |
| PDE9A   | -0.18347 | 2.80E-05 | 7.05E-05 |
| PDF     | 0.172169 | 8.60E-05 | 2.02E-04 |
| PDGFA   | -0.28688 | 3.25E-11 | 1.62E-10 |
| PDGFB   | 0.058375 | 1.86E-01 | 2.39E-01 |
| PDGFC   | -0.0903  | 4.05E-02 | 6.09E-02 |
| PDGFD   | -0.16164 | 2.30E-04 | 5.10E-04 |
| PDGFRA  | -0.12918 | 3.32E-03 | 6.13E-03 |
| PDGFRB  | -0.16583 | 1.57E-04 | 3.55E-04 |
| PDGFRL  | 0.048627 | 2.71E-01 | 3.33E-01 |
| PDHA1   | 0.094446 | 3.21E-02 | 4.93E-02 |
| PDHA2   | 0.054746 | 2.15E-01 | 2.71E-01 |
| PDHB    | -0.03417 | 4.39E-01 | 5.06E-01 |
| PDHX    | 0.287347 | 3.02E-11 | 1.51E-10 |
| PDIA2   | -0.01877 | 6.71E-01 | 7.22E-01 |
| PDIA3P  | -0.02207 | 6.17E-01 | 6.74E-01 |
| PDIA3   | -0.03596 | 4.15E-01 | 4.82E-01 |
| PDIA4   | 0.275293 | 2.08E-10 | 9.61E-10 |
| PDIA5   | 0.108107 | 1.41E-02 | 2.33E-02 |
| PDIA6   | 0.298696 | 4.50E-12 | 2.47E-11 |
| PDIK1L  | -0.27135 | 3.83E-10 | 1.72E-09 |
| PDILT   | -0.09206 | 3.68E-02 | 5.57E-02 |
| PDK1    | 0.440348 | 7.71E-26 | 1.46E-24 |
| PDK2    | -0.46336 | 9.00E-29 | 2.12E-27 |
| PDK3    | 0.37209  | 2.35E-18 | 2.36E-17 |



|          |          |          |          |
|----------|----------|----------|----------|
| PDK4     | -0.22869 | 1.55E-07 | 5.17E-07 |
| PDLIM1   | -0.18305 | 2.92E-05 | 7.33E-05 |
| PDLIM2   | -0.39005 | 3.69E-20 | 4.37E-19 |
| PDLIM3   | 0.037305 | 3.98E-01 | 4.65E-01 |
| PDLIM4   | 0.079864 | 7.02E-02 | 1.00E-01 |
| PDLIM5   | 0.235272 | 6.58E-08 | 2.29E-07 |
| PDLIM7   | 0.165071 | 1.68E-04 | 3.79E-04 |
| PDP1     | -0.00268 | 9.52E-01 | 9.62E-01 |
| PDP2     | -0.13102 | 2.89E-03 | 5.40E-03 |
| PDPK1    | -0.38965 | 4.05E-20 | 4.78E-19 |
| PDPN     | 0.097042 | 2.77E-02 | 4.30E-02 |
| PDPR     | -0.20621 | 2.37E-06 | 6.85E-06 |
| PDRG1    | 0.374365 | 1.41E-18 | 1.44E-17 |
| PDS5A    | 0.01849  | 6.75E-01 | 7.26E-01 |
| PDS5B    | 0.015202 | 7.31E-01 | 7.75E-01 |
| PDSS1    | 0.569421 | 1.35E-45 | 8.05E-44 |
| PDSS2    | -0.01546 | 7.26E-01 | 7.72E-01 |
| PDX1     | 0.128905 | 3.38E-03 | 6.25E-03 |
| PDXDC1   | -0.18629 | 2.09E-05 | 5.37E-05 |
| PDXDC2   | -0.33469 | 6.05E-15 | 4.39E-14 |
| PDXK     | -0.00953 | 8.29E-01 | 8.59E-01 |
| PDXP     | 0.220839 | 4.15E-07 | 1.32E-06 |
| PDYN     | -0.03819 | 3.87E-01 | 4.54E-01 |
| PDZD11   | 0.389569 | 4.13E-20 | 4.87E-19 |
| PDZD2    | -0.52304 | 1.67E-37 | 6.54E-36 |
| PDZD3    | 0.02397  | 5.87E-01 | 6.46E-01 |
| PDZD4    | -0.25836 | 2.68E-09 | 1.09E-08 |
| PDZD7    | 0.147224 | 8.05E-04 | 1.64E-03 |
| PDZD8    | 0.090248 | 4.06E-02 | 6.11E-02 |
| PDZD9    | -0.18757 | 1.83E-05 | 4.74E-05 |
| PDZK1IP1 | -0.17339 | 7.65E-05 | 1.81E-04 |
| PDZK1P1  | -0.16271 | 2.09E-04 | 4.65E-04 |
| PDZK1    | 0.018159 | 6.81E-01 | 7.31E-01 |
| PDZRN3   | -0.20702 | 2.16E-06 | 6.27E-06 |
| PDZRN4   | -0.21658 | 6.97E-07 | 2.16E-06 |
| PEA15    | 0.001031 | 9.81E-01 | 9.86E-01 |
| PEAR1    | -0.30816 | 8.61E-13 | 5.10E-12 |
| PEBP1    | -0.32061 | 8.94E-14 | 5.82E-13 |
| PEBP4    | -0.50079 | 4.79E-34 | 1.57E-32 |
| PECAM1   | -0.29318 | 1.15E-11 | 6.00E-11 |
| PECI     | -0.06167 | 1.62E-01 | 2.12E-01 |
| PECR     | 0.130161 | 3.08E-03 | 5.73E-03 |
| PEF1     | -0.23735 | 5.00E-08 | 1.76E-07 |
| PEG10    | 0.132504 | 2.59E-03 | 4.86E-03 |

|         |          |          |          |
|---------|----------|----------|----------|
| PEG3AS  | -0.0594  | 1.78E-01 | 2.31E-01 |
| PEG3    | -0.33363 | 7.44E-15 | 5.35E-14 |
| PELI1   | -0.1196  | 6.58E-03 | 1.15E-02 |
| PELI2   | -0.25459 | 4.62E-09 | 1.83E-08 |
| PELI3   | -0.02014 | 6.48E-01 | 7.02E-01 |
| PELO    | 0.127064 | 3.87E-03 | 7.08E-03 |
| PELP1   | 0.029392 | 5.06E-01 | 5.70E-01 |
| PEMT    | -0.10594 | 1.62E-02 | 2.64E-02 |
| PENK    | -0.40349 | 1.39E-21 | 1.84E-20 |
| PEPD    | 0.038844 | 3.79E-01 | 4.45E-01 |
| PER1    | -0.41381 | 1.01E-22 | 1.47E-21 |
| PER2    | -0.26025 | 2.03E-09 | 8.38E-09 |
| PER3    | -0.35408 | 1.17E-16 | 1.01E-15 |
| PER4    | 0.045313 | 3.05E-01 | 3.68E-01 |
| PERP    | 0.269806 | 4.85E-10 | 2.16E-09 |
| PES1    | 0.251457 | 7.22E-09 | 2.80E-08 |
| PET112L | 0.122859 | 5.24E-03 | 9.37E-03 |
| PEX10   | 0.013688 | 7.57E-01 | 7.98E-01 |
| PEX11A  | -0.2714  | 3.80E-10 | 1.71E-09 |
| PEX11B  | -0.32132 | 7.82E-14 | 5.12E-13 |
| PEX11G  | -0.31085 | 5.32E-13 | 3.22E-12 |
| PEX12   | -0.05343 | 2.26E-01 | 2.84E-01 |
| PEX13   | 0.07721  | 8.00E-02 | 1.13E-01 |
| PEX14   | -0.07345 | 9.59E-02 | 1.33E-01 |
| PEX16   | -0.09776 | 2.65E-02 | 4.14E-02 |
| PEX19   | -0.05249 | 2.34E-01 | 2.93E-01 |
| PEX1    | 0.134826 | 2.17E-03 | 4.12E-03 |
| PEX26   | 0.142152 | 1.22E-03 | 2.42E-03 |
| PEX2    | -0.02647 | 5.49E-01 | 6.11E-01 |
| PEX3    | 0.102461 | 2.00E-02 | 3.21E-02 |
| PEX5L   | -0.01732 | 6.95E-01 | 7.44E-01 |
| PEX5    | 0.05417  | 2.20E-01 | 2.77E-01 |
| PEX6    | -0.07411 | 9.29E-02 | 1.29E-01 |
| PEX7    | -0.09623 | 2.90E-02 | 4.49E-02 |
| PF4V1   | 0.06713  | 1.28E-01 | 1.72E-01 |
| PF4     | 0.034375 | 4.36E-01 | 5.03E-01 |
| PFAS    | 0.006864 | 8.77E-01 | 9.00E-01 |
| PFDN1   | 0.043968 | 3.19E-01 | 3.84E-01 |
| PFDN2   | 0.341167 | 1.67E-15 | 1.27E-14 |
| PFDN4   | 0.423919 | 7.06E-24 | 1.14E-22 |
| PFDN5   | 0.023078 | 6.01E-01 | 6.59E-01 |
| PFDN6   | 0.248952 | 1.03E-08 | 3.91E-08 |
| PFKFB1  | -0.01754 | 6.91E-01 | 7.41E-01 |
| PFKFB2  | -0.28775 | 2.82E-11 | 1.42E-10 |

|         |          |          |          |
|---------|----------|----------|----------|
| PFKFB3  | -0.02771 | 5.30E-01 | 5.94E-01 |
| PFKFB4  | 0.440825 | 6.74E-26 | 1.28E-24 |
| PFKL    | -0.06091 | 1.68E-01 | 2.18E-01 |
| PFKM    | 0.191374 | 1.23E-05 | 3.24E-05 |
| PFKP    | 0.477925 | 9.53E-31 | 2.58E-29 |
| PFN1    | 0.246676 | 1.41E-08 | 5.27E-08 |
| PFN2    | 0.465658 | 4.45E-29 | 1.08E-27 |
| PFN3    | 0.110304 | 1.23E-02 | 2.05E-02 |
| PFN4    | 0.167079 | 1.39E-04 | 3.18E-04 |
| PGA3    | -0.08452 | 5.53E-02 | 8.08E-02 |
| PGA4    | -0.04477 | 3.11E-01 | 3.75E-01 |
| PGA5    | -0.07282 | 9.88E-02 | 1.36E-01 |
| PGAM1   | 0.548645 | 8.17E-42 | 4.10E-40 |
| PGAM2   | -0.05992 | 1.75E-01 | 2.26E-01 |
| PGAM4   | 0.461271 | 1.70E-28 | 3.91E-27 |
| PGAM5   | 0.563761 | 1.54E-44 | 8.78E-43 |
| PGAP1   | -0.02323 | 5.99E-01 | 6.57E-01 |
| PGAP2   | -0.0981  | 2.60E-02 | 4.06E-02 |
| PGAP3   | -0.40668 | 6.22E-22 | 8.52E-21 |
| PGBD1   | 0.109949 | 1.25E-02 | 2.09E-02 |
| PGBD2   | -0.32823 | 2.12E-14 | 1.46E-13 |
| PGBD3   | -0.02192 | 6.20E-01 | 6.76E-01 |
| PGBD4   | -0.05818 | 1.87E-01 | 2.41E-01 |
| PGBD5   | 0.07302  | 9.79E-02 | 1.35E-01 |
| PGCP    | -0.43356 | 5.14E-25 | 9.06E-24 |
| PGC     | -0.50548 | 9.39E-35 | 3.17E-33 |
| PGD     | 0.208009 | 1.92E-06 | 5.63E-06 |
| PGF     | 0.183069 | 2.92E-05 | 7.32E-05 |
| PGGT1B  | -0.0457  | 3.01E-01 | 3.64E-01 |
| PGK1    | 0.461272 | 1.70E-28 | 3.91E-27 |
| PGK2    | 0.114036 | 9.60E-03 | 1.63E-02 |
| PGLS    | -0.0603  | 1.72E-01 | 2.23E-01 |
| PGLYRP1 | -0.04012 | 3.64E-01 | 4.30E-01 |
| PGLYRP2 | 0.096984 | 2.78E-02 | 4.31E-02 |
| PGLYRP3 | -0.0941  | 3.28E-02 | 5.02E-02 |
| PGLYRP4 | -0.14218 | 1.22E-03 | 2.41E-03 |
| PGM1    | 0.208734 | 1.77E-06 | 5.21E-06 |
| PGM2L1  | 0.266901 | 7.54E-10 | 3.28E-09 |
| PGM2    | 0.43557  | 2.94E-25 | 5.30E-24 |
| PGM3    | 0.467704 | 2.37E-29 | 5.84E-28 |
| PGM5P2  | -0.27151 | 3.74E-10 | 1.68E-09 |
| PGM5    | -0.47147 | 7.35E-30 | 1.87E-28 |
| PGPEP1L | 0.01139  | 7.97E-01 | 8.32E-01 |
| PGPEP1  | -0.42411 | 6.71E-24 | 1.09E-22 |

|         |          |          |          |
|---------|----------|----------|----------|
| PGP     | 0.285493 | 4.08E-11 | 2.01E-10 |
| PGRMC1  | -0.10471 | 1.75E-02 | 2.83E-02 |
| PGRMC2  | -0.06269 | 1.55E-01 | 2.04E-01 |
| PGR     | -0.45842 | 4.01E-28 | 9.02E-27 |
| PGS1    | -0.28765 | 2.87E-11 | 1.44E-10 |
| PHACTR1 | -0.47398 | 3.33E-30 | 8.72E-29 |
| PHACTR2 | -0.18313 | 2.90E-05 | 7.28E-05 |
| PHACTR3 | -0.20126 | 4.16E-06 | 1.17E-05 |
| PHACTR4 | -0.0373  | 3.98E-01 | 4.65E-01 |
| PHAX    | 0.102363 | 2.02E-02 | 3.22E-02 |
| PHB2    | 0.240831 | 3.14E-08 | 1.13E-07 |
| PHB     | 0.385557 | 1.07E-19 | 1.21E-18 |
| PHC1    | -0.13995 | 1.45E-03 | 2.85E-03 |
| PHC2    | -0.03111 | 4.81E-01 | 5.46E-01 |
| PHC3    | -0.22897 | 1.49E-07 | 5.00E-07 |
| PHEX    | 0.162857 | 2.06E-04 | 4.59E-04 |
| PHF10   | 0.005315 | 9.04E-01 | 9.23E-01 |
| PHF11   | -0.25136 | 7.32E-09 | 2.83E-08 |
| PHF12   | -0.12788 | 3.65E-03 | 6.70E-03 |
| PHF13   | 0.22021  | 4.48E-07 | 1.42E-06 |
| PHF14   | 0.153576 | 4.70E-04 | 9.90E-04 |
| PHF15   | -0.28383 | 5.35E-11 | 2.61E-10 |
| PHF16   | 0.118855 | 6.93E-03 | 1.21E-02 |
| PHF17   | -0.2041  | 3.02E-06 | 8.63E-06 |
| PHF19   | 0.530534 | 9.97E-39 | 4.27E-37 |
| PHF1    | -0.34809 | 4.08E-16 | 3.33E-15 |
| PHF20L1 | 0.102263 | 2.03E-02 | 3.24E-02 |
| PHF20   | 0.097682 | 2.66E-02 | 4.16E-02 |
| PHF21A  | -0.16293 | 2.05E-04 | 4.56E-04 |
| PHF21B  | 0.023702 | 5.92E-01 | 6.50E-01 |
| PHF23   | 0.015554 | 7.25E-01 | 7.70E-01 |
| PHF2    | -0.35899 | 4.14E-17 | 3.74E-16 |
| PHF3    | -0.10219 | 2.04E-02 | 3.26E-02 |
| PHF5A   | 0.3291   | 1.79E-14 | 1.24E-13 |
| PHF6    | 0.374593 | 1.33E-18 | 1.37E-17 |
| PHF7    | -0.20936 | 1.64E-06 | 4.85E-06 |
| PHF8    | 0.106958 | 1.52E-02 | 2.49E-02 |
| PHGDH   | 0.26686  | 7.59E-10 | 3.30E-09 |
| PHGR1   | 0.053867 | 2.22E-01 | 2.80E-01 |
| PHIP    | -0.1455  | 9.28E-04 | 1.87E-03 |
| PHKA1   | 0.172256 | 8.53E-05 | 2.01E-04 |
| PHKA2   | -0.19833 | 5.76E-06 | 1.59E-05 |
| PHKB    | -0.47437 | 2.95E-30 | 7.75E-29 |
| PHKG1   | -0.17194 | 8.79E-05 | 2.06E-04 |

|          |          |          |          |
|----------|----------|----------|----------|
| PHKG2    | -0.1658  | 1.57E-04 | 3.55E-04 |
| PHLDA1   | 0.071365 | 1.06E-01 | 1.45E-01 |
| PHLDA2   | 0.162868 | 2.06E-04 | 4.59E-04 |
| PHLDA3   | -0.33593 | 4.74E-15 | 3.48E-14 |
| PHLDB1   | -0.21585 | 7.61E-07 | 2.34E-06 |
| PHLDB2   | 0.178901 | 4.45E-05 | 1.09E-04 |
| PHLDB3   | 0.021807 | 6.21E-01 | 6.78E-01 |
| PHLPP1   | 0.074907 | 8.95E-02 | 1.25E-01 |
| PHLPP2   | 0.13944  | 1.51E-03 | 2.95E-03 |
| PHOSPHO1 | -0.02637 | 5.50E-01 | 6.12E-01 |
| PHOSPHO2 | -0.06981 | 1.14E-01 | 1.54E-01 |
| PHOX2A   | 0.245479 | 1.66E-08 | 6.18E-08 |
| PHOX2B   | -0.08948 | 4.24E-02 | 6.34E-02 |
| PHPT1    | -0.15607 | 3.78E-04 | 8.09E-04 |
| PHRF1    | -0.09497 | 3.12E-02 | 4.80E-02 |
| PHTF1    | 0.085485 | 5.25E-02 | 7.71E-02 |
| PHTF2    | 0.358371 | 4.72E-17 | 4.25E-16 |
| PHYHD1   | -0.41383 | 1.00E-22 | 1.46E-21 |
| PHYHIPL  | 0.012579 | 7.76E-01 | 8.14E-01 |
| PHYHIP   | -0.09348 | 3.39E-02 | 5.18E-02 |
| PHYH     | 0.039445 | 3.72E-01 | 4.38E-01 |
| PI15     | 0.290868 | 1.69E-11 | 8.67E-11 |
| PI16     | -0.34274 | 1.22E-15 | 9.42E-15 |
| PI3      | 0.200164 | 4.70E-06 | 1.32E-05 |
| PI4K2A   | 0.001794 | 9.68E-01 | 9.75E-01 |
| PI4K2B   | -0.047   | 2.87E-01 | 3.49E-01 |
| PI4KAP1  | -0.10149 | 2.12E-02 | 3.38E-02 |
| PI4KAP2  | -0.05576 | 2.06E-01 | 2.62E-01 |
| PI4KA    | -0.09968 | 2.37E-02 | 3.74E-02 |
| PI4KB    | -0.16598 | 1.54E-04 | 3.50E-04 |
| PIAS1    | -0.02931 | 5.07E-01 | 5.71E-01 |
| PIAS2    | 0.141562 | 1.28E-03 | 2.53E-03 |
| PIAS3    | -0.12277 | 5.27E-03 | 9.42E-03 |
| PIAS4    | 0.122374 | 5.42E-03 | 9.68E-03 |
| PIBF1    | -0.18506 | 2.38E-05 | 6.05E-05 |
| PICALM   | 0.195313 | 8.02E-06 | 2.18E-05 |
| PICK1    | -0.18764 | 1.82E-05 | 4.71E-05 |
| PID1     | -0.33501 | 5.68E-15 | 4.14E-14 |
| PIF1     | 0.621898 | 1.90E-56 | 1.52E-54 |
| PIGA     | -0.22474 | 2.55E-07 | 8.34E-07 |
| PIGB     | -0.14993 | 6.41E-04 | 1.33E-03 |
| PIGC     | 0.166121 | 1.52E-04 | 3.46E-04 |
| PIGF     | 0.18143  | 3.45E-05 | 8.57E-05 |
| PIGG     | -0.00242 | 9.56E-01 | 9.65E-01 |

|         |           |          |          |
|---------|-----------|----------|----------|
| PIGH    | -0.03962  | 3.70E-01 | 4.36E-01 |
| PIGK    | 0.052786  | 2.32E-01 | 2.90E-01 |
| PIGL    | -0.1472   | 8.06E-04 | 1.64E-03 |
| PIGM    | -0.11829  | 7.20E-03 | 1.25E-02 |
| PIGN    | -0.0096   | 8.28E-01 | 8.58E-01 |
| PIGO    | 0.073133  | 9.73E-02 | 1.34E-01 |
| PIGP    | -0.11931  | 6.71E-03 | 1.18E-02 |
| PIGQ    | -0.41946  | 2.30E-23 | 3.57E-22 |
| PIGR    | -0.44299  | 3.65E-26 | 7.11E-25 |
| PIGS    | 0.094953  | 3.12E-02 | 4.80E-02 |
| PIGT    | -0.079    | 7.32E-02 | 1.04E-01 |
| PIGU    | 0.244191  | 1.99E-08 | 7.31E-08 |
| PIGV    | -0.2312   | 1.12E-07 | 3.81E-07 |
| PIGW    | 0.372838  | 1.98E-18 | 2.01E-17 |
| PIGX    | 0.346157  | 6.07E-16 | 4.87E-15 |
| PIGY    | -0.11638  | 8.20E-03 | 1.41E-02 |
| PIGZ    | -0.13093  | 2.91E-03 | 5.43E-03 |
| PIH1D1  | 0.145125  | 9.57E-04 | 1.93E-03 |
| PIH1D2  | -0.19314  | 1.01E-05 | 2.71E-05 |
| PIK3AP1 | 0.109685  | 1.28E-02 | 2.13E-02 |
| PIK3C2A | -0.09394  | 3.31E-02 | 5.06E-02 |
| PIK3C2B | -0.18834  | 1.69E-05 | 4.39E-05 |
| PIK3C2G | -0.04481  | 3.10E-01 | 3.74E-01 |
| PIK3C3  | 0.071596  | 1.05E-01 | 1.43E-01 |
| PIK3CA  | 0.200266  | 4.65E-06 | 1.30E-05 |
| PIK3CB  | 0.050317  | 2.54E-01 | 3.15E-01 |
| PIK3CD  | -0.15537  | 4.02E-04 | 8.56E-04 |
| PIK3CG  | -0.10887  | 1.34E-02 | 2.23E-02 |
| PIK3IP1 | -0.49905  | 8.72E-34 | 2.81E-32 |
| PIK3R1  | -0.38004  | 3.85E-19 | 4.14E-18 |
| PIK3R2  | -0.00317  | 9.43E-01 | 9.55E-01 |
| PIK3R3  | -0.09091  | 3.92E-02 | 5.91E-02 |
| PIK3R4  | 0.161329  | 2.37E-04 | 5.23E-04 |
| PIK3R5  | -0.16037  | 2.58E-04 | 5.66E-04 |
| PIK3R6  | -0.21696  | 6.66E-07 | 2.06E-06 |
| PIKFYVE | -0.06664  | 1.31E-01 | 1.75E-01 |
| PILRA   | -8.71E-05 | 9.98E-01 | 9.99E-01 |
| PILRB   | -0.10864  | 1.36E-02 | 2.26E-02 |
| PIM1    | 0.155566  | 3.95E-04 | 8.42E-04 |
| PIM2    | 0.011247  | 7.99E-01 | 8.34E-01 |
| PIM3    | -0.10728  | 1.49E-02 | 2.45E-02 |
| PIN1L   | 0.058099  | 1.88E-01 | 2.41E-01 |
| PIN1    | -0.01537  | 7.28E-01 | 7.73E-01 |
| PIN4    | 0.078269  | 7.60E-02 | 1.08E-01 |

|          |          |          |          |
|----------|----------|----------|----------|
| PINK1    | -0.42253 | 1.02E-23 | 1.64E-22 |
| PINX1    | 0.106779 | 1.53E-02 | 2.52E-02 |
| PION     | -0.38785 | 6.21E-20 | 7.21E-19 |
| PIP4K2A  | 0.241514 | 2.86E-08 | 1.04E-07 |
| PIP4K2B  | -0.13889 | 1.58E-03 | 3.07E-03 |
| PIP4K2C  | 0.222443 | 3.40E-07 | 1.09E-06 |
| PIP5K1A  | 0.179965 | 4.00E-05 | 9.84E-05 |
| PIP5K1B  | -0.35079 | 2.33E-16 | 1.95E-15 |
| PIP5K1C  | -0.15328 | 4.82E-04 | 1.01E-03 |
| PIP5K1P1 | 0.074476 | 9.13E-02 | 1.27E-01 |
| PIP5KL1  | -0.35395 | 1.21E-16 | 1.04E-15 |
| PIPOX    | 0.107351 | 1.48E-02 | 2.44E-02 |
| PIPSL    | 0.199331 | 5.16E-06 | 1.43E-05 |
| PIP      | -0.13762 | 1.75E-03 | 3.38E-03 |
| PIRT     | -0.02082 | 6.37E-01 | 6.92E-01 |
| PIR      | 0.078387 | 7.55E-02 | 1.07E-01 |
| PISD     | 0.005909 | 8.94E-01 | 9.14E-01 |
| PITPNA   | -0.35182 | 1.89E-16 | 1.59E-15 |
| PITPNB   | 0.362814 | 1.81E-17 | 1.70E-16 |
| PITPNC1  | 0.240109 | 3.46E-08 | 1.24E-07 |
| PITPNM1  | -0.12105 | 5.95E-03 | 1.05E-02 |
| PITPNM2  | -0.06562 | 1.37E-01 | 1.82E-01 |
| PITPNM3  | -0.45683 | 6.45E-28 | 1.43E-26 |
| PITRM1   | -0.04618 | 2.96E-01 | 3.59E-01 |
| PITX1    | 0.306716 | 1.11E-12 | 6.49E-12 |
| PITX2    | 0.072836 | 9.87E-02 | 1.36E-01 |
| PITX3    | 0.304944 | 1.52E-12 | 8.78E-12 |
| PIWIL1   | -0.01603 | 7.17E-01 | 7.63E-01 |
| PIWIL2   | 0.082227 | 6.22E-02 | 9.01E-02 |
| PIWIL3   | 0.057269 | 1.94E-01 | 2.49E-01 |
| PIWIL4   | -0.16106 | 2.42E-04 | 5.35E-04 |
| PJA1     | 0.124403 | 4.69E-03 | 8.47E-03 |
| PJA2     | -0.25999 | 2.11E-09 | 8.69E-09 |
| PKD1L1   | 0.002499 | 9.55E-01 | 9.64E-01 |
| PKD1L2   | 0.071486 | 1.05E-01 | 1.44E-01 |
| PKD1L3   | -0.1507  | 6.01E-04 | 1.25E-03 |
| PKD1     | -0.32549 | 3.57E-14 | 2.41E-13 |
| PKD2L1   | -0.03282 | 4.57E-01 | 5.24E-01 |
| PKD2L2   | -0.07556 | 8.67E-02 | 1.21E-01 |
| PKD2     | -0.20236 | 3.67E-06 | 1.04E-05 |
| PKDCC    | 0.094941 | 3.12E-02 | 4.80E-02 |
| PKDREJ   | -0.19377 | 9.48E-06 | 2.55E-05 |
| PKHD1L1  | -0.21698 | 6.64E-07 | 2.06E-06 |
| PKHD1    | -0.1932  | 1.01E-05 | 2.70E-05 |

|          |          |          |          |
|----------|----------|----------|----------|
| PKIA     | 0.060478 | 1.71E-01 | 2.22E-01 |
| PKIB     | 0.313158 | 3.51E-13 | 2.16E-12 |
| PKIG     | 0.015153 | 7.32E-01 | 7.76E-01 |
| PKLR     | 0.052639 | 2.33E-01 | 2.92E-01 |
| PKM2     | 0.380811 | 3.22E-19 | 3.50E-18 |
| PKMYT1   | 0.753101 | 2.44E-95 | 3.58E-93 |
| PKN1     | 0.056004 | 2.04E-01 | 2.60E-01 |
| PKN2     | 0.249343 | 9.72E-09 | 3.71E-08 |
| PKN3     | 0.083861 | 5.72E-02 | 8.34E-02 |
| PKNOX1   | 0.031654 | 4.74E-01 | 5.39E-01 |
| PKNOX2   | -0.44056 | 7.26E-26 | 1.38E-24 |
| PKP1     | -0.12659 | 4.01E-03 | 7.31E-03 |
| PKP2     | 0.348803 | 3.53E-16 | 2.89E-15 |
| PKP3     | 0.093654 | 3.36E-02 | 5.14E-02 |
| PKP4     | 0.031858 | 4.71E-01 | 5.36E-01 |
| PL-5283  | 0.387567 | 6.64E-20 | 7.67E-19 |
| PLA1A    | -0.15024 | 6.25E-04 | 1.29E-03 |
| PLA2G10  | -0.50789 | 4.02E-35 | 1.38E-33 |
| PLA2G12A | -0.18356 | 2.78E-05 | 6.99E-05 |
| PLA2G12B | -0.26626 | 8.32E-10 | 3.59E-09 |
| PLA2G15  | -0.11517 | 8.89E-03 | 1.52E-02 |
| PLA2G16  | -0.10548 | 1.66E-02 | 2.71E-02 |
| PLA2G1B  | -0.53058 | 9.78E-39 | 4.20E-37 |
| PLA2G2A  | -0.18344 | 2.81E-05 | 7.06E-05 |
| PLA2G2C  | -0.10685 | 1.53E-02 | 2.51E-02 |
| PLA2G2D  | 0.009785 | 8.25E-01 | 8.55E-01 |
| PLA2G2F  | 0.064389 | 1.45E-01 | 1.91E-01 |
| PLA2G3   | -0.22429 | 2.70E-07 | 8.79E-07 |
| PLA2G4A  | -0.0149  | 7.36E-01 | 7.80E-01 |
| PLA2G4C  | -0.15198 | 5.39E-04 | 1.13E-03 |
| PLA2G4D  | 0.107346 | 1.48E-02 | 2.44E-02 |
| PLA2G4E  | -0.10739 | 1.48E-02 | 2.43E-02 |
| PLA2G4F  | -0.46353 | 8.54E-29 | 2.02E-27 |
| PLA2G5   | -0.18332 | 2.84E-05 | 7.14E-05 |
| PLA2G6   | -0.27456 | 2.33E-10 | 1.07E-09 |
| PLA2G7   | 0.120763 | 6.07E-03 | 1.07E-02 |
| PLA2R1   | -0.01652 | 7.08E-01 | 7.56E-01 |
| PLAA     | 0.23488  | 6.93E-08 | 2.40E-07 |
| PLAC1L   | 0.072292 | 1.01E-01 | 1.39E-01 |
| PLAC1    | 0.312174 | 4.20E-13 | 2.56E-12 |
| PLAC2    | 0.016197 | 7.14E-01 | 7.61E-01 |
| PLAC4    | -0.09572 | 2.99E-02 | 4.61E-02 |
| PLAC8L1  | 0.011044 | 8.03E-01 | 8.37E-01 |
| PLAC8    | -0.15862 | 3.02E-04 | 6.56E-04 |



|         |          |          |          |
|---------|----------|----------|----------|
| PLAC9   | -0.4883  | 3.26E-32 | 9.64E-31 |
| PLAG1   | -0.09359 | 3.37E-02 | 5.15E-02 |
| PLAGL1  | -0.05593 | 2.05E-01 | 2.61E-01 |
| PLAGL2  | 0.044813 | 3.10E-01 | 3.74E-01 |
| PLAT    | -0.03549 | 4.22E-01 | 4.88E-01 |
| PLAUR   | 0.236646 | 5.49E-08 | 1.92E-07 |
| PLAU    | 0.357054 | 6.26E-17 | 5.53E-16 |
| PLB1    | -0.08286 | 6.02E-02 | 8.74E-02 |
| PLBD1   | 0.167193 | 1.38E-04 | 3.15E-04 |
| PLBD2   | 0.155325 | 4.03E-04 | 8.59E-04 |
| PLCB1   | 0.11456  | 9.27E-03 | 1.58E-02 |
| PLCB2   | -0.32617 | 3.14E-14 | 2.13E-13 |
| PLCB3   | 0.064982 | 1.41E-01 | 1.87E-01 |
| PLCB4   | -0.1828  | 3.00E-05 | 7.51E-05 |
| PLCD1   | -0.43999 | 8.54E-26 | 1.61E-24 |
| PLCD3   | 0.17144  | 9.23E-05 | 2.16E-04 |
| PLCD4   | -0.03784 | 3.91E-01 | 4.58E-01 |
| PLCE1   | -0.27675 | 1.66E-10 | 7.72E-10 |
| PLCG1   | -0.07924 | 7.24E-02 | 1.03E-01 |
| PLCG2   | -0.22064 | 4.25E-07 | 1.35E-06 |
| PLCH1   | -0.36424 | 1.33E-17 | 1.25E-16 |
| PLCH2   | -0.28755 | 2.92E-11 | 1.46E-10 |
| PLCL1   | -0.32944 | 1.68E-14 | 1.16E-13 |
| PLCL2   | -0.11388 | 9.70E-03 | 1.65E-02 |
| PLCXD1  | -0.05441 | 2.18E-01 | 2.75E-01 |
| PLCXD2  | 0.285298 | 4.22E-11 | 2.07E-10 |
| PLCXD3  | -0.32838 | 2.06E-14 | 1.42E-13 |
| PLCZ1   | 0.060834 | 1.68E-01 | 2.19E-01 |
| PLD1    | 0.261822 | 1.61E-09 | 6.72E-09 |
| PLD2    | -0.30484 | 1.55E-12 | 8.94E-12 |
| PLD3    | -0.35944 | 3.76E-17 | 3.42E-16 |
| PLD4    | -0.38885 | 4.91E-20 | 5.74E-19 |
| PLD5    | -0.15357 | 4.70E-04 | 9.90E-04 |
| PLD6    | -0.21719 | 6.48E-07 | 2.01E-06 |
| PLDN    | 0.057543 | 1.92E-01 | 2.46E-01 |
| PLEC    | -0.00559 | 8.99E-01 | 9.19E-01 |
| PLEK2   | 0.352091 | 1.78E-16 | 1.50E-15 |
| PLEKHA1 | -0.01793 | 6.85E-01 | 7.35E-01 |
| PLEKHA2 | -0.03592 | 4.16E-01 | 4.82E-01 |
| PLEKHA3 | -0.01104 | 8.03E-01 | 8.37E-01 |
| PLEKHA4 | -0.20214 | 3.76E-06 | 1.07E-05 |
| PLEKHA5 | 0.096009 | 2.94E-02 | 4.54E-02 |
| PLEKHA6 | -0.08791 | 4.62E-02 | 6.86E-02 |
| PLEKHA7 | -0.22814 | 1.66E-07 | 5.52E-07 |

|          |          |           |           |
|----------|----------|-----------|-----------|
| PLEKHA8  | 0.160114 | 2.64E-04  | 5.79E-04  |
| PLEKHA9  | 0.249403 | 9.64E-09  | 3.69E-08  |
| PLEKHB1  | -0.27463 | 2.30E-10  | 1.06E-09  |
| PLEKHB2  | 0.091253 | 3.84E-02  | 5.80E-02  |
| PLEKHF1  | -0.05386 | 2.22E-01  | 2.80E-01  |
| PLEKHF2  | -0.02112 | 6.33E-01  | 6.88E-01  |
| PLEKHG1  | -0.166   | 1.54E-04  | 3.49E-04  |
| PLEKHG2  | 0.113974 | 9.64E-03  | 1.64E-02  |
| PLEKHG3  | 0.090166 | 4.08E-02  | 6.13E-02  |
| PLEKHG4B | -0.18064 | 3.73E-05  | 9.23E-05  |
| PLEKHG4  | 0.003645 | 9.34E-01  | 9.48E-01  |
| PLEKHG5  | 0.048702 | 2.70E-01  | 3.32E-01  |
| PLEKHG6  | 0.218123 | 5.78E-07  | 1.81E-06  |
| PLEKHG7  | -0.24316 | 2.29E-08  | 8.36E-08  |
| PLEKHH1  | 0.192961 | 1.03E-05  | 2.76E-05  |
| PLEKHH2  | -0.3947  | 1.20E-20  | 1.49E-19  |
| PLEKHH3  | -0.16546 | 1.62E-04  | 3.67E-04  |
| PLEKHJ1  | 0.095164 | 3.08E-02  | 4.75E-02  |
| PLEKHM1P | -0.34179 | 1.47E-15  | 1.13E-14  |
| PLEKHM1  | -0.30943 | 6.86E-13  | 4.10E-12  |
| PLEKHM2  | -0.09419 | 3.26E-02  | 5.00E-02  |
| PLEKHM3  | -0.34352 | 1.04E-15  | 8.11E-15  |
| PLEKHN1  | -0.08388 | 5.71E-02  | 8.33E-02  |
| PLEKHO1  | 0.162248 | 2.18E-04  | 4.84E-04  |
| PLEKHO2  | -0.04853 | 2.72E-01  | 3.34E-01  |
| PLEK     | -0.01315 | 7.66E-01  | 8.05E-01  |
| PLGLA    | 0.015673 | 7.23E-01  | 7.69E-01  |
| PLGLB2   | -0.18657 | 2.03E-05  | 5.22E-05  |
| PLG      | -0.14756 | 7.82E-04  | 1.60E-03  |
| PLIN1    | -0.24165 | 2.81E-08  | 1.02E-07  |
| PLIN2    | 0.387028 | 7.54E-20  | 8.67E-19  |
| PLIN3    | 0.301765 | 2.65E-12  | 1.49E-11  |
| PLIN4    | -0.16162 | 2.30E-04  | 5.10E-04  |
| PLIN5    | -0.47624 | 1.63E-30  | 4.33E-29  |
| PLK1S1   | -0.30145 | 2.80E-12  | 1.57E-11  |
| PLK1     | 0.85899  | 2.91E-151 | 1.62E-148 |
| PLK2     | -0.04702 | 2.87E-01  | 3.49E-01  |
| PLK3     | -0.15902 | 2.91E-04  | 6.34E-04  |
| PLK4     | 0.838613 | 1.92E-137 | 6.61E-135 |
| PLK5P    | 0.020811 | 6.38E-01  | 6.92E-01  |
| PLLP     | -0.50274 | 2.44E-34  | 8.11E-33  |
| PLN      | -0.09264 | 3.56E-02  | 5.41E-02  |
| PLOD1    | 0.278244 | 1.31E-10  | 6.15E-10  |
| PLOD2    | 0.569896 | 1.10E-45  | 6.57E-44  |

|         |          |          |          |
|---------|----------|----------|----------|
| PLOD3   | 0.295994 | 7.13E-12 | 3.82E-11 |
| PLP1    | -0.29938 | 4.00E-12 | 2.21E-11 |
| PLP2    | 0.185525 | 2.27E-05 | 5.78E-05 |
| PLRG1   | 0.272138 | 3.39E-10 | 1.53E-09 |
| PLS1    | -0.01926 | 6.63E-01 | 7.15E-01 |
| PLS3    | -0.10035 | 2.28E-02 | 3.60E-02 |
| PLSCR1  | 0.379719 | 4.15E-19 | 4.45E-18 |
| PLSCR2  | 0.161387 | 2.35E-04 | 5.20E-04 |
| PLSCR3  | -0.08595 | 5.12E-02 | 7.54E-02 |
| PLSCR4  | -0.24203 | 2.67E-08 | 9.68E-08 |
| PLSCR5  | 0.15773  | 3.27E-04 | 7.06E-04 |
| PLTP    | 0.024477 | 5.79E-01 | 6.39E-01 |
| PLUNC   | 0.002157 | 9.61E-01 | 9.69E-01 |
| PLVAP   | 0.023132 | 6.00E-01 | 6.58E-01 |
| PLXDC1  | -0.21283 | 1.09E-06 | 3.29E-06 |
| PLXDC2  | -0.07371 | 9.47E-02 | 1.31E-01 |
| PLXNA1  | 0.157371 | 3.37E-04 | 7.27E-04 |
| PLXNA2  | -0.53405 | 2.59E-39 | 1.15E-37 |
| PLXNA3  | 0.076069 | 8.46E-02 | 1.19E-01 |
| PLXNA4  | -0.1221  | 5.53E-03 | 9.85E-03 |
| PLXNB1  | -0.37498 | 1.22E-18 | 1.26E-17 |
| PLXNB2  | -0.22818 | 1.65E-07 | 5.50E-07 |
| PLXNB3  | -0.1168  | 7.97E-03 | 1.38E-02 |
| PLXNC1  | -0.04233 | 3.38E-01 | 4.03E-01 |
| PLXND1  | -0.20624 | 2.36E-06 | 6.83E-06 |
| PM20D1  | -0.22047 | 4.34E-07 | 1.38E-06 |
| PM20D2  | 0.266365 | 8.18E-10 | 3.54E-09 |
| PMAIP1  | 0.495497 | 2.92E-33 | 9.13E-32 |
| PMCHL1  | 0.054222 | 2.19E-01 | 2.77E-01 |
| PMCHL2  | 0.017752 | 6.88E-01 | 7.37E-01 |
| PMCH    | 0.039707 | 3.69E-01 | 4.35E-01 |
| PMEPA1  | -0.03411 | 4.40E-01 | 5.06E-01 |
| PMF1    | -0.18798 | 1.75E-05 | 4.55E-05 |
| PMFBP1  | -0.01055 | 8.11E-01 | 8.44E-01 |
| PML     | 0.071725 | 1.04E-01 | 1.42E-01 |
| PMM1    | -0.4769  | 1.32E-30 | 3.54E-29 |
| PMM2    | 0.107675 | 1.45E-02 | 2.39E-02 |
| PMP22   | -0.16066 | 2.51E-04 | 5.53E-04 |
| PMP2    | -0.22739 | 1.83E-07 | 6.06E-07 |
| PMPCA   | 0.011601 | 7.93E-01 | 8.29E-01 |
| PMPCB   | 0.096569 | 2.84E-02 | 4.41E-02 |
| PMS1    | 0.230942 | 1.16E-07 | 3.93E-07 |
| PMS2CL  | 0.080334 | 6.85E-02 | 9.84E-02 |
| PMS2L11 | -0.09318 | 3.45E-02 | 5.26E-02 |

|          |          |          |          |
|----------|----------|----------|----------|
| PMS2L1   | 0.327566 | 2.40E-14 | 1.65E-13 |
| PMS2L2   | 0.014956 | 7.35E-01 | 7.79E-01 |
| PMS2L3   | -0.02839 | 5.20E-01 | 5.84E-01 |
| PMS2L4   | -0.04582 | 2.99E-01 | 3.63E-01 |
| PMS2L5   | 0.226596 | 2.02E-07 | 6.67E-07 |
| PMS2     | 0.110699 | 1.19E-02 | 2.00E-02 |
| PMVK     | -0.25861 | 2.58E-09 | 1.05E-08 |
| PNCK     | 0.199404 | 5.11E-06 | 1.42E-05 |
| PNKD     | -0.2465  | 1.44E-08 | 5.39E-08 |
| PNKP     | 0.118032 | 7.33E-03 | 1.27E-02 |
| PNLDC1   | -0.05906 | 1.81E-01 | 2.33E-01 |
| PNLIPRP1 | -0.05879 | 1.83E-01 | 2.36E-01 |
| PNLIPRP2 | -0.03796 | 3.90E-01 | 4.57E-01 |
| PNLIPRP3 | -0.04529 | 3.05E-01 | 3.69E-01 |
| PNLIP    | -0.00377 | 9.32E-01 | 9.46E-01 |
| PNMA1    | 0.324007 | 4.72E-14 | 3.16E-13 |
| PNMA2    | -0.4617  | 1.49E-28 | 3.45E-27 |
| PNMA3    | -0.03568 | 4.19E-01 | 4.85E-01 |
| PNMA5    | 0.06098  | 1.67E-01 | 2.18E-01 |
| PNMA6A   | -0.10035 | 2.27E-02 | 3.60E-02 |
| PNMAL1   | -0.12742 | 3.77E-03 | 6.91E-03 |
| PNMAL2   | -0.31187 | 4.43E-13 | 2.70E-12 |
| PNMT     | -0.22367 | 2.92E-07 | 9.47E-07 |
| PNN      | 0.066108 | 1.34E-01 | 1.79E-01 |
| PNO1     | 0.524219 | 1.08E-37 | 4.31E-36 |
| PNOC     | -0.07186 | 1.03E-01 | 1.42E-01 |
| PNPLA1   | 0.24751  | 1.26E-08 | 4.73E-08 |
| PNPLA2   | -0.40227 | 1.88E-21 | 2.48E-20 |
| PNPLA3   | 0.155715 | 3.90E-04 | 8.33E-04 |
| PNPLA4   | -0.18886 | 1.60E-05 | 4.17E-05 |
| PNPLA5   | 0.210128 | 1.50E-06 | 4.46E-06 |
| PNPLA6   | -0.04696 | 2.88E-01 | 3.50E-01 |
| PNPLA7   | -0.41673 | 4.72E-23 | 7.10E-22 |
| PNPLA8   | 0.236418 | 5.66E-08 | 1.98E-07 |
| PNPO     | 0.170067 | 1.05E-04 | 2.45E-04 |
| PNPT1    | 0.52477  | 8.76E-38 | 3.52E-36 |
| PNP      | 0.457224 | 5.73E-28 | 1.28E-26 |
| PNRC1    | -0.17579 | 6.05E-05 | 1.46E-04 |
| PNRC2    | -0.14503 | 9.64E-04 | 1.94E-03 |
| POC1A    | 0.762411 | 4.90E-99 | 7.83E-97 |
| POC1B    | 0.366356 | 8.37E-18 | 8.01E-17 |
| POC5     | 0.083198 | 5.92E-02 | 8.60E-02 |
| PODNL1   | -0.10175 | 2.09E-02 | 3.33E-02 |
| PODN     | -0.45288 | 2.07E-27 | 4.44E-26 |

|         |          |           |           |
|---------|----------|-----------|-----------|
| PODXL2  | -0.0655  | 1.38E-01  | 1.83E-01  |
| PODXL   | -0.16793 | 1.29E-04  | 2.95E-04  |
| POF1B   | 0.000555 | 9.90E-01  | 9.92E-01  |
| POFUT1  | 0.367275 | 6.84E-18  | 6.58E-17  |
| POFUT2  | -0.04709 | 2.86E-01  | 3.48E-01  |
| POGK    | -0.05187 | 2.40E-01  | 3.00E-01  |
| POGZ    | -0.12005 | 6.38E-03  | 1.12E-02  |
| POLA1   | 0.338568 | 2.81E-15  | 2.09E-14  |
| POLA2   | 0.671578 | 8.23E-69  | 8.39E-67  |
| POLB    | 0.150372 | 6.18E-04  | 1.28E-03  |
| POLD1   | 0.328658 | 1.95E-14  | 1.35E-13  |
| POLD2   | 0.390892 | 3.01E-20  | 3.60E-19  |
| POLD3   | 0.400538 | 2.89E-21  | 3.76E-20  |
| POLD4   | 0.009762 | 8.25E-01  | 8.56E-01  |
| POLDIP2 | 0.27338  | 2.80E-10  | 1.28E-09  |
| POLDIP3 | -0.32121 | 7.98E-14  | 5.23E-13  |
| POLE2   | 0.724199 | 7.65E-85  | 9.68E-83  |
| POLE3   | 0.387398 | 6.91E-20  | 7.98E-19  |
| POLE4   | 0.28817  | 2.63E-11  | 1.33E-10  |
| POLE    | 0.447858 | 9.01E-27  | 1.82E-25  |
| POLG2   | 0.08637  | 5.01E-02  | 7.39E-02  |
| POLG    | -0.10046 | 2.26E-02  | 3.58E-02  |
| POLH    | -0.23365 | 8.14E-08  | 2.81E-07  |
| POLI    | -0.29149 | 1.52E-11  | 7.86E-11  |
| POLK    | -0.15259 | 5.11E-04  | 1.07E-03  |
| POLL    | -0.24768 | 1.23E-08  | 4.62E-08  |
| POLM    | -0.207   | 2.16E-06  | 6.29E-06  |
| POLN    | -0.07322 | 9.70E-02  | 1.34E-01  |
| POLQ    | 0.777107 | 3.12E-105 | 5.47E-103 |
| POLR1A  | 0.312153 | 4.21E-13  | 2.57E-12  |
| POLR1B  | 0.281131 | 8.26E-11  | 3.96E-10  |
| POLR1C  | 0.162102 | 2.21E-04  | 4.90E-04  |
| POLR1D  | -0.05291 | 2.31E-01  | 2.89E-01  |
| POLR1E  | 0.129437 | 3.25E-03  | 6.03E-03  |
| POLR2A  | -0.06322 | 1.52E-01  | 2.00E-01  |
| POLR2B  | 0.268188 | 6.21E-10  | 2.72E-09  |
| POLR2C  | -0.209   | 1.72E-06  | 5.06E-06  |
| POLR2D  | 0.477265 | 1.18E-30  | 3.16E-29  |
| POLR2E  | 0.034237 | 4.38E-01  | 5.05E-01  |
| POLR2F  | 0.120502 | 6.18E-03  | 1.09E-02  |
| POLR2G  | 0.258209 | 2.74E-09  | 1.11E-08  |
| POLR2H  | 0.341421 | 1.59E-15  | 1.21E-14  |
| POLR2I  | 0.20213  | 3.77E-06  | 1.07E-05  |
| POLR2J2 | 0.05415  | 2.20E-01  | 2.77E-01  |

|            |          |          |          |
|------------|----------|----------|----------|
| POLR2J3    | -0.00562 | 8.99E-01 | 9.18E-01 |
| POLR2J4    | -0.02094 | 6.35E-01 | 6.90E-01 |
| POLR2J     | 0.246507 | 1.44E-08 | 5.39E-08 |
| POLR2K     | 0.223651 | 2.92E-07 | 9.49E-07 |
| POLR2L     | -0.18408 | 2.63E-05 | 6.64E-05 |
| POLR3A     | 0.252128 | 6.56E-09 | 2.56E-08 |
| POLR3B     | 0.103963 | 1.83E-02 | 2.95E-02 |
| POLR3C     | 0.186598 | 2.03E-05 | 5.21E-05 |
| POLR3D     | 0.253495 | 5.40E-09 | 2.13E-08 |
| POLR3E     | -0.09856 | 2.53E-02 | 3.97E-02 |
| POLR3F     | 0.21741  | 6.31E-07 | 1.96E-06 |
| POLR3GL    | -0.34146 | 1.57E-15 | 1.20E-14 |
| POLR3G     | 0.445885 | 1.59E-26 | 3.16E-25 |
| POLR3H     | -0.42526 | 4.93E-24 | 8.09E-23 |
| POLR3K     | 0.080269 | 6.87E-02 | 9.86E-02 |
| POLRMT     | 0.073783 | 9.44E-02 | 1.31E-01 |
| POM121C    | 0.089378 | 4.26E-02 | 6.38E-02 |
| POM121L10P | -0.33079 | 1.29E-14 | 9.07E-14 |
| POM121L1P  | -0.19097 | 1.28E-05 | 3.38E-05 |
| POM121L2   | 0.054873 | 2.14E-01 | 2.70E-01 |
| POM121L4P  | -0.20215 | 3.76E-06 | 1.07E-05 |
| POM121L8P  | -0.22073 | 4.20E-07 | 1.34E-06 |
| POM121L9P  | -0.29616 | 6.94E-12 | 3.72E-11 |
| POM121     | 0.084081 | 5.65E-02 | 8.25E-02 |
| POMC       | 0.09587  | 2.96E-02 | 4.57E-02 |
| POMGNT1    | -0.12064 | 6.12E-03 | 1.08E-02 |
| POMP       | 0.361688 | 2.32E-17 | 2.15E-16 |
| POMT1      | -0.3152  | 2.42E-13 | 1.51E-12 |
| POMT2      | -0.01686 | 7.03E-01 | 7.51E-01 |
| POMZP3     | -0.1176  | 7.55E-03 | 1.31E-02 |
| PON1       | -0.16052 | 2.55E-04 | 5.59E-04 |
| PON2       | 0.013601 | 7.58E-01 | 7.99E-01 |
| PON3       | -0.17541 | 6.28E-05 | 1.51E-04 |
| POP1       | 0.554384 | 7.84E-43 | 4.14E-41 |
| POP4       | 0.25308  | 5.73E-09 | 2.25E-08 |
| POP5       | 0.12948  | 3.24E-03 | 6.01E-03 |
| POP7       | 0.435978 | 2.63E-25 | 4.76E-24 |
| POPDC2     | -0.1972  | 6.52E-06 | 1.79E-05 |
| POPDC3     | 0.396974 | 6.93E-21 | 8.72E-20 |
| PORCN      | 0.065687 | 1.37E-01 | 1.82E-01 |
| POR        | -0.04534 | 3.04E-01 | 3.68E-01 |
| POSTN      | 0.277392 | 1.50E-10 | 7.00E-10 |
| POT1       | 0.371247 | 2.83E-18 | 2.83E-17 |
| POTEA      | 0.057123 | 1.96E-01 | 2.50E-01 |

|             |          |          |          |
|-------------|----------|----------|----------|
| POTEB       | 0.021842 | 6.21E-01 | 6.77E-01 |
| POTEC       | 0.052397 | 2.35E-01 | 2.94E-01 |
| POTED       | 0.064754 | 1.42E-01 | 1.89E-01 |
| POTEE       | 0.118004 | 7.34E-03 | 1.28E-02 |
| POTEF       | 0.177353 | 5.18E-05 | 1.26E-04 |
| POTEG       | 0.111362 | 1.14E-02 | 1.92E-02 |
| POTEH       | 0.094429 | 3.22E-02 | 4.93E-02 |
| POU1F1      | -0.12412 | 4.79E-03 | 8.63E-03 |
| POU2AF1     | -0.08501 | 5.39E-02 | 7.89E-02 |
| POU2F1      | 0.009463 | 8.30E-01 | 8.60E-01 |
| POU2F2      | -0.01318 | 7.65E-01 | 8.05E-01 |
| POU2F3      | -0.3502  | 2.64E-16 | 2.19E-15 |
| POU3F1      | -0.1716  | 9.08E-05 | 2.13E-04 |
| POU3F2      | 0.048552 | 2.71E-01 | 3.33E-01 |
| POU3F3      | 0.039914 | 3.66E-01 | 4.32E-01 |
| POU3F4      | 0.064307 | 1.45E-01 | 1.92E-01 |
| POU4F1      | 0.2211   | 4.02E-07 | 1.28E-06 |
| POU4F2      | 0.142539 | 1.18E-03 | 2.35E-03 |
| POU4F3      | 0.014023 | 7.51E-01 | 7.93E-01 |
| POU5F1B     | -0.25572 | 3.93E-09 | 1.57E-08 |
| POU5F1      | -0.22087 | 4.13E-07 | 1.31E-06 |
| POU5F2      | -0.05816 | 1.88E-01 | 2.41E-01 |
| POU6F1      | -0.35767 | 5.49E-17 | 4.89E-16 |
| POU6F2      | 0.09641  | 2.87E-02 | 4.45E-02 |
| PP14571     | 0.040754 | 3.56E-01 | 4.22E-01 |
| PPA1        | 0.071269 | 1.06E-01 | 1.45E-01 |
| PPA2        | -0.06334 | 1.51E-01 | 1.99E-01 |
| PPAN-P2RY11 | -0.09235 | 3.62E-02 | 5.49E-02 |
| PPAN        | 0.236534 | 5.57E-08 | 1.95E-07 |
| PPAP2A      | -0.17487 | 6.62E-05 | 1.58E-04 |
| PPAP2B      | -0.32541 | 3.62E-14 | 2.44E-13 |
| PPAP2C      | 0.007986 | 8.57E-01 | 8.83E-01 |
| PPAPDC1A    | 0.337982 | 3.16E-15 | 2.35E-14 |
| PPAPDC1B    | -0.02989 | 4.99E-01 | 5.63E-01 |
| PPAPDC2     | 0.043039 | 3.30E-01 | 3.95E-01 |
| PPAPDC3     | -0.07174 | 1.04E-01 | 1.42E-01 |
| PPARA       | -0.17734 | 5.19E-05 | 1.26E-04 |
| PPARD       | 0.065869 | 1.35E-01 | 1.81E-01 |
| PPARGC1A    | -0.10444 | 1.77E-02 | 2.87E-02 |
| PPARGC1B    | 0.030775 | 4.86E-01 | 5.51E-01 |
| PPARG       | 0.111324 | 1.15E-02 | 1.93E-02 |
| PPAT        | 0.619926 | 5.30E-56 | 4.14E-54 |
| PPBPL2      | 0.009282 | 8.34E-01 | 8.63E-01 |
| PPBP        | -0.06637 | 1.33E-01 | 1.77E-01 |

|         |          |          |          |
|---------|----------|----------|----------|
| PPCDC   | 0.077969 | 7.71E-02 | 1.09E-01 |
| PPCS    | 0.012939 | 7.70E-01 | 8.08E-01 |
| PPDPF   | -0.27593 | 1.88E-10 | 8.73E-10 |
| PPEF1   | 0.148319 | 7.34E-04 | 1.51E-03 |
| PPEF2   | -0.10115 | 2.17E-02 | 3.45E-02 |
| PPFIA1  | 0.155665 | 3.92E-04 | 8.36E-04 |
| PPFIA2  | -0.17665 | 5.56E-05 | 1.34E-04 |
| PPFIA3  | 0.14716  | 8.09E-04 | 1.65E-03 |
| PPFIA4  | 0.139593 | 1.49E-03 | 2.92E-03 |
| PPFIBP1 | 0.196373 | 7.14E-06 | 1.95E-05 |
| PPFIBP2 | -0.44716 | 1.10E-26 | 2.22E-25 |
| PPHLN1  | 0.357142 | 6.14E-17 | 5.44E-16 |
| PPIAL4C | 0.352117 | 1.77E-16 | 1.50E-15 |
| PPIAL4D | 0.126308 | 4.09E-03 | 7.45E-03 |
| PPIAL4E | 0.026691 | 5.46E-01 | 6.08E-01 |
| PPIAL4G | 0.322675 | 6.07E-14 | 4.02E-13 |
| PPIA    | 0.368124 | 5.67E-18 | 5.49E-17 |
| PPIB    | 0.024472 | 5.80E-01 | 6.39E-01 |
| PPIC    | 0.065141 | 1.40E-01 | 1.86E-01 |
| PPID    | 0.449616 | 5.40E-27 | 1.11E-25 |
| PPIEL   | -0.2887  | 2.42E-11 | 1.22E-10 |
| PPIE    | 0.020251 | 6.47E-01 | 7.01E-01 |
| PPIF    | 0.483141 | 1.77E-31 | 5.00E-30 |
| PPIG    | 0.196783 | 6.83E-06 | 1.87E-05 |
| PPIH    | 0.371923 | 2.44E-18 | 2.45E-17 |
| PPIL1   | 0.441394 | 5.74E-26 | 1.10E-24 |
| PPIL2   | -0.14425 | 1.03E-03 | 2.06E-03 |
| PPIL3   | 0.12559  | 4.31E-03 | 7.83E-03 |
| PPIL4   | 0.141269 | 1.31E-03 | 2.58E-03 |
| PPIL5   | 0.591574 | 6.20E-50 | 4.17E-48 |
| PPIL6   | -0.40817 | 4.27E-22 | 5.93E-21 |
| PPIP5K1 | -0.1591  | 2.89E-04 | 6.30E-04 |
| PPIP5K2 | 0.07743  | 7.92E-02 | 1.12E-01 |
| PPL     | -0.2706  | 4.30E-10 | 1.92E-09 |
| PPM1A   | -0.14507 | 9.61E-04 | 1.94E-03 |
| PPM1B   | 0.058565 | 1.85E-01 | 2.38E-01 |
| PPM1D   | -0.02851 | 5.19E-01 | 5.83E-01 |
| PPM1E   | 0.120217 | 6.31E-03 | 1.11E-02 |
| PPM1F   | -0.09773 | 2.66E-02 | 4.15E-02 |
| PPM1G   | 0.646692 | 2.50E-62 | 2.29E-60 |
| PPM1H   | 0.078496 | 7.51E-02 | 1.07E-01 |
| PPM1J   | -0.08726 | 4.78E-02 | 7.07E-02 |
| PPM1K   | -0.09409 | 3.28E-02 | 5.02E-02 |
| PPM1L   | -0.03097 | 4.83E-01 | 5.48E-01 |



|          |          |          |          |
|----------|----------|----------|----------|
| PPM1M    | -0.34068 | 1.84E-15 | 1.40E-14 |
| PPM1N    | 0.048927 | 2.68E-01 | 3.29E-01 |
| PPME1    | 0.301574 | 2.74E-12 | 1.54E-11 |
| PPOX     | -0.34629 | 5.91E-16 | 4.75E-15 |
| PPP1CA   | 0.222242 | 3.49E-07 | 1.12E-06 |
| PPP1CB   | 0.311544 | 4.70E-13 | 2.86E-12 |
| PPP1CC   | 0.48343  | 1.61E-31 | 4.57E-30 |
| PPP1R10  | -0.11628 | 8.26E-03 | 1.42E-02 |
| PPP1R11  | -0.05351 | 2.25E-01 | 2.83E-01 |
| PPP1R12A | 0.34839  | 3.84E-16 | 3.13E-15 |
| PPP1R12B | -0.40804 | 4.41E-22 | 6.12E-21 |
| PPP1R12C | -0.14539 | 9.36E-04 | 1.89E-03 |
| PPP1R13B | -0.50815 | 3.66E-35 | 1.27E-33 |
| PPP1R13L | -0.08371 | 5.76E-02 | 8.40E-02 |
| PPP1R14A | -0.16239 | 2.15E-04 | 4.78E-04 |
| PPP1R14B | 0.320892 | 8.47E-14 | 5.53E-13 |
| PPP1R14C | -0.1251  | 4.47E-03 | 8.08E-03 |
| PPP1R14D | 0.087881 | 4.62E-02 | 6.87E-02 |
| PPP1R15A | -0.20112 | 4.22E-06 | 1.19E-05 |
| PPP1R15B | 0.140037 | 1.44E-03 | 2.83E-03 |
| PPP1R16A | -0.12939 | 3.27E-03 | 6.04E-03 |
| PPP1R16B | -0.13228 | 2.63E-03 | 4.94E-03 |
| PPP1R1A  | -0.11653 | 8.12E-03 | 1.40E-02 |
| PPP1R1B  | -0.33931 | 2.42E-15 | 1.82E-14 |
| PPP1R1C  | -0.02704 | 5.40E-01 | 6.03E-01 |
| PPP1R2P1 | 0.094308 | 3.24E-02 | 4.96E-02 |
| PPP1R2P3 | 0.226678 | 2.00E-07 | 6.61E-07 |
| PPP1R2P9 | 0.038676 | 3.81E-01 | 4.48E-01 |
| PPP1R2   | 0.185809 | 2.20E-05 | 5.63E-05 |
| PPP1R3A  | 0.106663 | 1.55E-02 | 2.53E-02 |
| PPP1R3B  | -0.12358 | 4.98E-03 | 8.94E-03 |
| PPP1R3C  | -0.22126 | 3.94E-07 | 1.26E-06 |
| PPP1R3D  | -0.15902 | 2.91E-04 | 6.34E-04 |
| PPP1R3E  | -0.21236 | 1.16E-06 | 3.47E-06 |
| PPP1R3F  | -0.08982 | 4.16E-02 | 6.24E-02 |
| PPP1R3G  | 0.355866 | 8.05E-17 | 7.03E-16 |
| PPP1R7   | -0.10339 | 1.89E-02 | 3.05E-02 |
| PPP1R8   | 0.265655 | 9.10E-10 | 3.91E-09 |
| PPP1R9A  | -0.24151 | 2.86E-08 | 1.04E-07 |
| PPP1R9B  | -0.14598 | 8.92E-04 | 1.80E-03 |
| PPP2CA   | 0.278586 | 1.24E-10 | 5.83E-10 |
| PPP2CB   | -0.18741 | 1.86E-05 | 4.82E-05 |
| PPP2R1A  | 0.053586 | 2.25E-01 | 2.83E-01 |
| PPP2R1B  | 0.319078 | 1.19E-13 | 7.63E-13 |

|          |          |          |          |
|----------|----------|----------|----------|
| PPP2R2A  | 0.050931 | 2.49E-01 | 3.09E-01 |
| PPP2R2B  | -0.10043 | 2.26E-02 | 3.59E-02 |
| PPP2R2C  | 0.159112 | 2.89E-04 | 6.29E-04 |
| PPP2R2D  | 0.00311  | 9.44E-01 | 9.56E-01 |
| PPP2R3A  | -0.10359 | 1.87E-02 | 3.01E-02 |
| PPP2R3B  | 0.134654 | 2.20E-03 | 4.18E-03 |
| PPP2R3C  | 0.217237 | 6.44E-07 | 2.00E-06 |
| PPP2R4   | -0.01908 | 6.66E-01 | 7.17E-01 |
| PPP2R5A  | -0.42673 | 3.31E-24 | 5.52E-23 |
| PPP2R5B  | 0.00712  | 8.72E-01 | 8.96E-01 |
| PPP2R5C  | -0.10878 | 1.35E-02 | 2.24E-02 |
| PPP2R5D  | 0.239293 | 3.86E-08 | 1.37E-07 |
| PPP2R5E  | 0.299017 | 4.26E-12 | 2.34E-11 |
| PPP3CA   | -0.24593 | 1.56E-08 | 5.82E-08 |
| PPP3CB   | -0.08011 | 6.93E-02 | 9.93E-02 |
| PPP3CC   | -0.25397 | 5.05E-09 | 1.99E-08 |
| PPP3R1   | 0.325035 | 3.89E-14 | 2.62E-13 |
| PPP3R2   | -0.08854 | 4.46E-02 | 6.65E-02 |
| PPP4C    | 0.319195 | 1.16E-13 | 7.47E-13 |
| PPP4R1L  | -0.13516 | 2.11E-03 | 4.02E-03 |
| PPP4R1   | -0.07321 | 9.70E-02 | 1.34E-01 |
| PPP4R2   | 0.338982 | 2.59E-15 | 1.94E-14 |
| PPP4R4   | -0.15582 | 3.86E-04 | 8.25E-04 |
| PPP5C    | 0.150936 | 5.89E-04 | 1.23E-03 |
| PPP6C    | -0.08633 | 5.02E-02 | 7.40E-02 |
| PPPDE1   | -0.10802 | 1.42E-02 | 2.34E-02 |
| PPPDE2   | 0.024298 | 5.82E-01 | 6.41E-01 |
| PPRC1    | 0.017445 | 6.93E-01 | 7.42E-01 |
| PPT1     | 0.036697 | 4.06E-01 | 4.72E-01 |
| PPT2     | 0.304427 | 1.66E-12 | 9.57E-12 |
| PPTC7    | 0.187407 | 1.86E-05 | 4.82E-05 |
| PPWD1    | -0.0904  | 4.03E-02 | 6.06E-02 |
| PPY2     | 0.238861 | 4.09E-08 | 1.45E-07 |
| PPYR1    | -0.07858 | 7.48E-02 | 1.06E-01 |
| PPY      | 0.057407 | 1.93E-01 | 2.48E-01 |
| PQBP1    | 0.114827 | 9.10E-03 | 1.56E-02 |
| PQLC1    | -0.15914 | 2.88E-04 | 6.28E-04 |
| PQLC2    | 0.051346 | 2.45E-01 | 3.05E-01 |
| PQLC3    | -0.10494 | 1.72E-02 | 2.79E-02 |
| PRAC     | 0.09692  | 2.79E-02 | 4.33E-02 |
| PRAF2    | -0.04961 | 2.61E-01 | 3.22E-01 |
| PRAM1    | -0.24311 | 2.30E-08 | 8.41E-08 |
| PRAMEF10 | 0.01469  | 7.39E-01 | 7.83E-01 |
| PRAMEF11 | 0.101693 | 2.10E-02 | 3.34E-02 |

|          |          |           |           |
|----------|----------|-----------|-----------|
| PRAMEF12 | 0.060753 | 1.69E-01  | 2.19E-01  |
| PRAMEF13 | -0.05853 | 1.85E-01  | 2.38E-01  |
| PRAMEF14 | -0.05583 | 2.06E-01  | 2.61E-01  |
| PRAMEF16 | -0.12719 | 3.84E-03  | 7.02E-03  |
| PRAMEF18 | -0.08242 | 6.16E-02  | 8.92E-02  |
| PRAMEF1  | -0.03018 | 4.94E-01  | 5.59E-01  |
| PRAMEF20 | 0.068815 | 1.19E-01  | 1.61E-01  |
| PRAMEF22 | 0.022868 | 6.05E-01  | 6.62E-01  |
| PRAMEF2  | -0.06283 | 1.55E-01  | 2.03E-01  |
| PRAMEF4  | 0.092833 | 3.52E-02  | 5.36E-02  |
| PRAMEF5  | 0.110973 | 1.17E-02  | 1.97E-02  |
| PRAMEF6  | 0.098485 | 2.54E-02  | 3.98E-02  |
| PRAMEF8  | -0.1233  | 5.08E-03  | 9.11E-03  |
| PRAMEF9  | 0.049306 | 2.64E-01  | 3.25E-01  |
| PRAME    | 0.313103 | 3.55E-13  | 2.18E-12  |
| PRAP1    | 0.197365 | 6.41E-06  | 1.76E-05  |
| PRB1     | -0.09172 | 3.74E-02  | 5.67E-02  |
| PRB2     | -0.12013 | 6.34E-03  | 1.12E-02  |
| PRB3     | -0.0742  | 9.26E-02  | 1.29E-01  |
| PRB4     | -0.11257 | 1.06E-02  | 1.79E-02  |
| PRC1     | 0.859189 | 2.09E-151 | 1.19E-148 |
| PRCC     | 0.218595 | 5.46E-07  | 1.71E-06  |
| PRCD     | -0.35267 | 1.58E-16  | 1.34E-15  |
| PRCP     | 0.135537 | 2.05E-03  | 3.92E-03  |
| PRDM10   | 0.018466 | 6.76E-01  | 7.27E-01  |
| PRDM11   | -0.18958 | 1.48E-05  | 3.88E-05  |
| PRDM12   | 0.167135 | 1.39E-04  | 3.16E-04  |
| PRDM13   | 0.299843 | 3.69E-12  | 2.05E-11  |
| PRDM14   | 0.056803 | 1.98E-01  | 2.53E-01  |
| PRDM15   | -0.0692  | 1.17E-01  | 1.58E-01  |
| PRDM16   | -0.52318 | 1.58E-37  | 6.25E-36  |
| PRDM1    | 0.06761  | 1.25E-01  | 1.69E-01  |
| PRDM2    | -0.35385 | 1.23E-16  | 1.06E-15  |
| PRDM4    | 0.249336 | 9.73E-09  | 3.72E-08  |
| PRDM5    | -0.12641 | 4.06E-03  | 7.40E-03  |
| PRDM6    | -0.39964 | 3.60E-21  | 4.64E-20  |
| PRDM7    | 0.058276 | 1.87E-01  | 2.40E-01  |
| PRDM8    | 0.132243 | 2.64E-03  | 4.95E-03  |
| PRDM9    | 0.256464 | 3.53E-09  | 1.41E-08  |
| PRDX1    | 0.170183 | 1.04E-04  | 2.42E-04  |
| PRDX2    | 0.075762 | 8.59E-02  | 1.20E-01  |
| PRDX3    | 0.217918 | 5.93E-07  | 1.85E-06  |
| PRDX4    | 0.221022 | 4.05E-07  | 1.29E-06  |
| PRDX5    | -0.20619 | 2.38E-06  | 6.87E-06  |

|          |          |          |          |
|----------|----------|----------|----------|
| PRDX6    | 0.015091 | 7.33E-01 | 7.77E-01 |
| PRDXDD1P | -0.0534  | 2.26E-01 | 2.84E-01 |
| PREB     | 0.454748 | 1.20E-27 | 2.60E-26 |
| PRELID1  | 0.258258 | 2.72E-09 | 1.11E-08 |
| PRELID2  | 0.123198 | 5.12E-03 | 9.17E-03 |
| PRELP    | -0.3934  | 1.65E-20 | 2.02E-19 |
| PREPL    | -0.23112 | 1.13E-07 | 3.85E-07 |
| PREP     | 0.103991 | 1.82E-02 | 2.95E-02 |
| PREX1    | -0.10665 | 1.55E-02 | 2.53E-02 |
| PREX2    | -0.34296 | 1.16E-15 | 9.03E-15 |
| PRF1     | 0.0336   | 4.47E-01 | 5.13E-01 |
| PRG1     | 0.055485 | 2.09E-01 | 2.65E-01 |
| PRG2     | -0.12864 | 3.45E-03 | 6.36E-03 |
| PRG3     | 0.010917 | 8.05E-01 | 8.39E-01 |
| PRG4     | -0.46498 | 5.48E-29 | 1.31E-27 |
| PRH1     | 0.0069   | 8.76E-01 | 8.99E-01 |
| PRH2     | -0.18401 | 2.65E-05 | 6.69E-05 |
| PRHOXNB  | 0.059344 | 1.79E-01 | 2.31E-01 |
| PRIC285  | 0.022238 | 6.15E-01 | 6.71E-01 |
| PRICKLE1 | -0.29373 | 1.04E-11 | 5.50E-11 |
| PRICKLE2 | -0.43287 | 6.21E-25 | 1.09E-23 |
| PRICKLE3 | 0.152003 | 5.38E-04 | 1.12E-03 |
| PRICKLE4 | -0.55442 | 7.74E-43 | 4.10E-41 |
| PRIM1    | 0.672239 | 5.43E-69 | 5.59E-67 |
| PRIM2    | 0.370161 | 3.61E-18 | 3.57E-17 |
| PRIMA1   | -0.1507  | 6.01E-04 | 1.25E-03 |
| PRINS    | -0.2324  | 9.58E-08 | 3.28E-07 |
| PRKAA1   | 0.012083 | 7.84E-01 | 8.21E-01 |
| PRKAA2   | 0.181281 | 3.50E-05 | 8.69E-05 |
| PRKAB1   | -0.35692 | 6.43E-17 | 5.68E-16 |
| PRKAB2   | 0.088755 | 4.41E-02 | 6.58E-02 |
| PRKACA   | -0.10169 | 2.10E-02 | 3.34E-02 |
| PRKACB   | 0.038774 | 3.80E-01 | 4.46E-01 |
| PRKACG   | -0.05554 | 2.08E-01 | 2.64E-01 |
| PRKAG1   | 0.140002 | 1.45E-03 | 2.83E-03 |
| PRKAG2   | -0.10048 | 2.26E-02 | 3.58E-02 |
| PRKAG3   | -0.03594 | 4.16E-01 | 4.82E-01 |
| PRKAR1A  | -0.29771 | 5.33E-12 | 2.89E-11 |
| PRKAR1B  | 0.074001 | 9.34E-02 | 1.30E-01 |
| PRKAR2A  | -0.02079 | 6.38E-01 | 6.93E-01 |
| PRKAR2B  | -0.19455 | 8.71E-06 | 2.35E-05 |
| PRKCA    | -0.04597 | 2.98E-01 | 3.61E-01 |
| PRKCB    | -0.23459 | 7.20E-08 | 2.49E-07 |
| PRKCDBP  | -0.02817 | 5.24E-01 | 5.87E-01 |

|         |          |          |          |
|---------|----------|----------|----------|
| PRKCD   | -0.40295 | 1.59E-21 | 2.10E-20 |
| PRKCE   | -0.41049 | 2.36E-22 | 3.34E-21 |
| PRKCG   | 0.131396 | 2.81E-03 | 5.26E-03 |
| PRKCH   | -0.15985 | 2.70E-04 | 5.92E-04 |
| PRKCI   | 0.007671 | 8.62E-01 | 8.87E-01 |
| PRKCQ   | -0.18559 | 2.25E-05 | 5.75E-05 |
| PRKCSH  | 0.025559 | 5.63E-01 | 6.23E-01 |
| PRKCZ   | -0.38617 | 9.23E-20 | 1.05E-18 |
| PRKD1   | -0.08217 | 6.24E-02 | 9.03E-02 |
| PRKD2   | -0.06701 | 1.29E-01 | 1.73E-01 |
| PRKD3   | 0.242443 | 2.52E-08 | 9.18E-08 |
| PRKDC   | 0.419351 | 2.37E-23 | 3.67E-22 |
| PRKG1   | -0.19334 | 9.93E-06 | 2.66E-05 |
| PRKG2   | 0.094851 | 3.14E-02 | 4.82E-02 |
| PRKRA   | 0.149212 | 6.81E-04 | 1.41E-03 |
| PRKRIP1 | 0.008398 | 8.49E-01 | 8.77E-01 |
| PRKRIR  | 0.202492 | 3.62E-06 | 1.03E-05 |
| PRKX    | 0.041608 | 3.46E-01 | 4.12E-01 |
| PRKY    | -0.02734 | 5.36E-01 | 5.99E-01 |
| PRLHR   | 0.090319 | 4.05E-02 | 6.09E-02 |
| PRLH    | 0.025789 | 5.59E-01 | 6.20E-01 |
| PRLR    | -0.01166 | 7.92E-01 | 8.28E-01 |
| PRL     | 0.16609  | 1.53E-04 | 3.47E-04 |
| PRM1    | -0.03586 | 4.17E-01 | 4.83E-01 |
| PRM2    | -0.03267 | 4.59E-01 | 5.26E-01 |
| PRM3    | 0.03786  | 3.91E-01 | 4.58E-01 |
| PRMT10  | 0.003863 | 9.30E-01 | 9.45E-01 |
| PRMT1   | 0.396248 | 8.27E-21 | 1.04E-19 |
| PRMT2   | -0.33533 | 5.33E-15 | 3.89E-14 |
| PRMT3   | 0.324952 | 3.95E-14 | 2.66E-13 |
| PRMT5   | 0.378955 | 4.94E-19 | 5.27E-18 |
| PRMT6   | 0.181687 | 3.36E-05 | 8.35E-05 |
| PRMT7   | -0.22465 | 2.58E-07 | 8.43E-07 |
| PRMT8   | -0.52766 | 2.96E-38 | 1.23E-36 |
| PRND    | -0.14802 | 7.53E-04 | 1.54E-03 |
| PRNP    | -0.06343 | 1.51E-01 | 1.98E-01 |
| PRO0611 | -0.11938 | 6.68E-03 | 1.17E-02 |
| PRO0628 | -0.11676 | 7.99E-03 | 1.38E-02 |
| PRO1768 | -0.00474 | 9.14E-01 | 9.32E-01 |
| PROCA1  | -0.05356 | 2.25E-01 | 2.83E-01 |
| PROCR   | 0.11268  | 1.05E-02 | 1.77E-02 |
| PROC    | -0.06227 | 1.58E-01 | 2.07E-01 |
| PRODH2  | 0.114642 | 9.22E-03 | 1.57E-02 |
| PRODH   | -0.37416 | 1.47E-18 | 1.51E-17 |

|         |          |           |           |
|---------|----------|-----------|-----------|
| PROK1   | -0.14372 | 1.07E-03  | 2.14E-03  |
| PROK2   | 0.025145 | 5.69E-01  | 6.29E-01  |
| PROKR1  | 0.010287 | 8.16E-01  | 8.48E-01  |
| PROKR2  | 0.07157  | 1.05E-01  | 1.43E-01  |
| PROL1   | 0.082823 | 6.04E-02  | 8.76E-02  |
| PROM1   | -0.12631 | 4.09E-03  | 7.45E-03  |
| PROM2   | -0.14934 | 6.74E-04  | 1.39E-03  |
| PROP1   | 0.008031 | 8.56E-01  | 8.82E-01  |
| PROS1   | -0.13092 | 2.91E-03  | 5.43E-03  |
| PROSC   | 0.065484 | 1.38E-01  | 1.83E-01  |
| PROX1   | 0.053146 | 2.29E-01  | 2.87E-01  |
| PROX2   | -0.01155 | 7.94E-01  | 8.29E-01  |
| PROZ    | -0.01365 | 7.57E-01  | 7.98E-01  |
| PRPF18  | -0.02629 | 5.52E-01  | 6.13E-01  |
| PRPF19  | 0.404889 | 9.77E-22  | 1.31E-20  |
| PRPF31  | 0.119156 | 6.79E-03  | 1.19E-02  |
| PRPF38A | 0.20603  | 2.42E-06  | 6.98E-06  |
| PRPF38B | -0.0743  | 9.21E-02  | 1.28E-01  |
| PRPF39  | -0.0207  | 6.39E-01  | 6.94E-01  |
| PRPF3   | 0.035074 | 4.27E-01  | 4.93E-01  |
| PRPF40A | 0.512085 | 9.05E-36  | 3.25E-34  |
| PRPF40B | 0.04124  | 3.50E-01  | 4.16E-01  |
| PRPF4B  | -0.06207 | 1.60E-01  | 2.09E-01  |
| PRPF4   | 0.494179 | 4.57E-33  | 1.41E-31  |
| PRPF6   | -0.14327 | 1.11E-03  | 2.22E-03  |
| PRPF8   | -0.19562 | 7.76E-06  | 2.11E-05  |
| PRPH2   | 0.046919 | 2.88E-01  | 3.50E-01  |
| PRPH    | 0.023553 | 5.94E-01  | 6.52E-01  |
| PRPS1L1 | 0.055793 | 2.06E-01  | 2.62E-01  |
| PRPS1   | 0.303193 | 2.07E-12  | 1.18E-11  |
| PRPS2   | 0.302683 | 2.26E-12  | 1.28E-11  |
| PRPSAP1 | 0.352901 | 1.50E-16  | 1.28E-15  |
| PRPSAP2 | 0.13522  | 2.10E-03  | 4.01E-03  |
| PRR11   | 0.789116 | 1.17E-110 | 2.29E-108 |
| PRR12   | -0.16388 | 1.87E-04  | 4.20E-04  |
| PRR13   | 0.095851 | 2.96E-02  | 4.58E-02  |
| PRR14   | -0.15809 | 3.16E-04  | 6.86E-04  |
| PRR15L  | -0.42374 | 7.40E-24  | 1.20E-22  |
| PRR15   | 0.153092 | 4.90E-04  | 1.03E-03  |
| PRR16   | 0.192657 | 1.07E-05  | 2.85E-05  |
| PRR18   | 0.042978 | 3.30E-01  | 3.96E-01  |
| PRR19   | 0.325739 | 3.40E-14  | 2.30E-13  |
| PRR22   | -0.07569 | 8.62E-02  | 1.21E-01  |
| PRR23A  | 0.010596 | 8.10E-01  | 8.43E-01  |

|              |          |          |          |
|--------------|----------|----------|----------|
| PRR23C       | -0.01682 | 7.03E-01 | 7.51E-01 |
| PRR24        | -0.23116 | 1.13E-07 | 3.83E-07 |
| PRR25        | -0.06004 | 1.74E-01 | 2.25E-01 |
| PRR3         | 0.002477 | 9.55E-01 | 9.64E-01 |
| PRR4         | -0.06214 | 1.59E-01 | 2.08E-01 |
| PRR5-ARHGAP8 | -0.21508 | 8.35E-07 | 2.55E-06 |
| PRR5L        | -0.0107  | 8.09E-01 | 8.42E-01 |
| PRR5         | -0.09743 | 2.70E-02 | 4.21E-02 |
| PRR7         | 0.250561 | 8.19E-09 | 3.15E-08 |
| PRRC1        | -0.0818  | 6.36E-02 | 9.19E-02 |
| PRRG1        | -0.05594 | 2.05E-01 | 2.61E-01 |
| PRRG2        | -0.24847 | 1.10E-08 | 4.16E-08 |
| PRRG3        | -0.11042 | 1.22E-02 | 2.03E-02 |
| PRRG4        | 0.005041 | 9.09E-01 | 9.27E-01 |
| PRRT1        | -0.04047 | 3.59E-01 | 4.26E-01 |
| PRRT2        | -0.22857 | 1.57E-07 | 5.25E-07 |
| PRRT3        | -0.19757 | 6.26E-06 | 1.72E-05 |
| PRRT4        | -0.10341 | 1.89E-02 | 3.04E-02 |
| PRRX1        | 0.069656 | 1.14E-01 | 1.55E-01 |
| PRRX2        | 0.165209 | 1.66E-04 | 3.74E-04 |
| PRSS12       | -0.36313 | 1.70E-17 | 1.59E-16 |
| PRSS16       | -0.24736 | 1.28E-08 | 4.82E-08 |
| PRSS1        | 0.101634 | 2.11E-02 | 3.36E-02 |
| PRSS21       | 0.053472 | 2.26E-01 | 2.84E-01 |
| PRSS22       | 0.055375 | 2.10E-01 | 2.66E-01 |
| PRSS23       | 0.15735  | 3.38E-04 | 7.28E-04 |
| PRSS27       | -0.10854 | 1.37E-02 | 2.27E-02 |
| PRSS30P      | -0.04786 | 2.78E-01 | 3.40E-01 |
| PRSS33       | -0.06448 | 1.44E-01 | 1.91E-01 |
| PRSS35       | -0.19025 | 1.38E-05 | 3.63E-05 |
| PRSS36       | -0.07168 | 1.04E-01 | 1.43E-01 |
| PRSS37       | -0.1138  | 9.75E-03 | 1.66E-02 |
| PRSS38       | -0.0004  | 9.93E-01 | 9.94E-01 |
| PRSS3        | 0.273477 | 2.76E-10 | 1.26E-09 |
| PRSS41       | 0.031808 | 4.71E-01 | 5.37E-01 |
| PRSS42       | 0.130134 | 3.09E-03 | 5.74E-03 |
| PRSS45       | -0.10289 | 1.95E-02 | 3.13E-02 |
| PRSS48       | 0.027285 | 5.37E-01 | 5.99E-01 |
| PRSS50       | 0.030591 | 4.89E-01 | 5.53E-01 |
| PRSS53       | 0.06002  | 1.74E-01 | 2.26E-01 |
| PRSS54       | -0.00787 | 8.59E-01 | 8.84E-01 |
| PRSS55       | -0.05976 | 1.76E-01 | 2.28E-01 |
| PRSS8        | -0.26488 | 1.02E-09 | 4.37E-09 |
| PRSSL1       | -0.15976 | 2.72E-04 | 5.96E-04 |

|          |          |          |          |
|----------|----------|----------|----------|
| PRTFDC1  | 0.486529 | 5.84E-32 | 1.69E-30 |
| PRTG     | -0.09286 | 3.51E-02 | 5.35E-02 |
| PRTN3    | 0.004559 | 9.18E-01 | 9.34E-01 |
| PRUNE2   | -0.18616 | 2.12E-05 | 5.44E-05 |
| PRUNE    | -0.059   | 1.81E-01 | 2.34E-01 |
| PRX      | -0.50097 | 4.51E-34 | 1.48E-32 |
| PRY2     | -0.03083 | 4.85E-01 | 5.50E-01 |
| PSAPL1   | -0.10782 | 1.44E-02 | 2.37E-02 |
| PSAP     | -0.03738 | 3.97E-01 | 4.64E-01 |
| PSAT1    | 0.468506 | 1.85E-29 | 4.60E-28 |
| PSCA     | 0.070788 | 1.09E-01 | 1.48E-01 |
| PSD2     | -0.05307 | 2.29E-01 | 2.88E-01 |
| PSD3     | -0.10515 | 1.70E-02 | 2.76E-02 |
| PSD4     | -0.36219 | 2.08E-17 | 1.93E-16 |
| PSD      | -0.13533 | 2.08E-03 | 3.98E-03 |
| PSEN1    | 0.02396  | 5.87E-01 | 6.46E-01 |
| PSEN2    | -0.27889 | 1.18E-10 | 5.57E-10 |
| PSENEEN  | 0.173867 | 7.30E-05 | 1.74E-04 |
| PSG10    | 0.115101 | 8.94E-03 | 1.53E-02 |
| PSG11    | 0.095116 | 3.09E-02 | 4.76E-02 |
| PSG1     | 0.174712 | 6.72E-05 | 1.61E-04 |
| PSG2     | 0.143399 | 1.10E-03 | 2.20E-03 |
| PSG3     | 0.253967 | 5.05E-09 | 1.99E-08 |
| PSG4     | 0.183935 | 2.67E-05 | 6.74E-05 |
| PSG5     | 0.165408 | 1.63E-04 | 3.68E-04 |
| PSG6     | 0.188443 | 1.67E-05 | 4.35E-05 |
| PSG7     | 0.122679 | 5.31E-03 | 9.48E-03 |
| PSG8     | 0.199708 | 4.94E-06 | 1.38E-05 |
| PSG9     | 0.169831 | 1.08E-04 | 2.50E-04 |
| PSIMCT-1 | 0.242718 | 2.43E-08 | 8.85E-08 |
| PSIP1    | 0.215967 | 7.51E-07 | 2.31E-06 |
| PSKH1    | -0.27751 | 1.47E-10 | 6.87E-10 |
| PSKH2    | -0.07345 | 9.59E-02 | 1.33E-01 |
| PSMA1    | 0.316173 | 2.03E-13 | 1.27E-12 |
| PSMA2    | 0.471681 | 6.87E-30 | 1.75E-28 |
| PSMA3    | 0.317145 | 1.70E-13 | 1.08E-12 |
| PSMA4    | 0.351484 | 2.02E-16 | 1.70E-15 |
| PSMA5    | 0.43937  | 1.02E-25 | 1.90E-24 |
| PSMA6    | 0.369008 | 4.66E-18 | 4.56E-17 |
| PSMA7    | 0.393734 | 1.52E-20 | 1.87E-19 |
| PSMA8    | 0.020923 | 6.36E-01 | 6.91E-01 |
| PSMB10   | -0.00491 | 9.12E-01 | 9.29E-01 |
| PSMB11   | 0.019277 | 6.63E-01 | 7.15E-01 |
| PSMB1    | 0.29359  | 1.07E-11 | 5.62E-11 |



|          |          |          |          |
|----------|----------|----------|----------|
| PSMB2    | 0.422686 | 9.81E-24 | 1.58E-22 |
| PSMB3    | 0.400263 | 3.09E-21 | 4.01E-20 |
| PSMB4    | 0.288531 | 2.48E-11 | 1.25E-10 |
| PSMB5    | 0.381401 | 2.81E-19 | 3.07E-18 |
| PSMB6    | 0.24898  | 1.02E-08 | 3.89E-08 |
| PSMB7    | 0.377375 | 7.10E-19 | 7.45E-18 |
| PSMB8    | 0.212064 | 1.20E-06 | 3.59E-06 |
| PSMB9    | 0.290971 | 1.66E-11 | 8.53E-11 |
| PSMC1    | 0.296614 | 6.42E-12 | 3.46E-11 |
| PSMC2    | 0.447576 | 9.77E-27 | 1.97E-25 |
| PSMC3IP  | 0.658424 | 2.62E-65 | 2.56E-63 |
| PSMC3    | 0.336036 | 4.64E-15 | 3.41E-14 |
| PSMC4    | 0.48307  | 1.81E-31 | 5.11E-30 |
| PSMC5    | 0.268749 | 5.70E-10 | 2.51E-09 |
| PSMC6    | 0.359255 | 3.91E-17 | 3.55E-16 |
| PSMD10   | 0.256973 | 3.28E-09 | 1.32E-08 |
| PSMD11   | 0.591812 | 5.54E-50 | 3.74E-48 |
| PSMD12   | 0.641415 | 4.95E-61 | 4.41E-59 |
| PSMD13   | 0.22429  | 2.70E-07 | 8.79E-07 |
| PSMD14   | 0.562409 | 2.74E-44 | 1.54E-42 |
| PSMD1    | 0.484818 | 1.02E-31 | 2.94E-30 |
| PSMD2    | 0.541494 | 1.42E-40 | 6.79E-39 |
| PSMD3    | 0.426939 | 3.13E-24 | 5.25E-23 |
| PSMD4    | 0.222635 | 3.32E-07 | 1.07E-06 |
| PSMD5    | 0.076121 | 8.44E-02 | 1.18E-01 |
| PSMD6    | 0.261203 | 1.77E-09 | 7.34E-09 |
| PSMD7    | 0.342678 | 1.23E-15 | 9.54E-15 |
| PSMD8    | 0.308005 | 8.85E-13 | 5.23E-12 |
| PSMD9    | 0.306081 | 1.24E-12 | 7.23E-12 |
| PSME1    | 0.13234  | 2.62E-03 | 4.92E-03 |
| PSME2    | 0.375131 | 1.18E-18 | 1.22E-17 |
| PSME3    | 0.508679 | 3.04E-35 | 1.06E-33 |
| PSME4    | 0.460303 | 2.27E-28 | 5.20E-27 |
| PSMF1    | -0.05387 | 2.22E-01 | 2.80E-01 |
| PSMG1    | 0.323256 | 5.44E-14 | 3.62E-13 |
| PSMG2    | 0.105889 | 1.62E-02 | 2.65E-02 |
| PSMG3    | 0.250978 | 7.72E-09 | 2.98E-08 |
| PSMG4    | 0.056079 | 2.04E-01 | 2.59E-01 |
| PSORS1C1 | -0.12607 | 4.16E-03 | 7.58E-03 |
| PSORS1C2 | -0.07687 | 8.14E-02 | 1.15E-01 |
| PSORS1C3 | -0.26179 | 1.62E-09 | 6.75E-09 |
| PSPC1    | 0.147214 | 8.05E-04 | 1.64E-03 |
| PSPH     | 0.434554 | 3.90E-25 | 6.94E-24 |
| PSPN     | -0.0855  | 5.25E-02 | 7.71E-02 |

|         |          |          |          |
|---------|----------|----------|----------|
| PSRC1   | 0.692691 | 7.92E-75 | 8.94E-73 |
| PSTK    | 0.077859 | 7.75E-02 | 1.10E-01 |
| PSTPIP1 | -0.10704 | 1.51E-02 | 2.48E-02 |
| PSTPIP2 | -0.10594 | 1.62E-02 | 2.64E-02 |
| PTAFR   | 0.075411 | 8.73E-02 | 1.22E-01 |
| PTAR1   | -0.30377 | 1.87E-12 | 1.07E-11 |
| PTBP1   | 0.425558 | 4.55E-24 | 7.48E-23 |
| PTBP2   | 0.109327 | 1.30E-02 | 2.17E-02 |
| PTCD1   | 0.286176 | 3.65E-11 | 1.81E-10 |
| PTCD2   | 0.170489 | 1.01E-04 | 2.36E-04 |
| PTCD3   | 0.347294 | 4.81E-16 | 3.89E-15 |
| PTCH1   | -0.46478 | 5.83E-29 | 1.39E-27 |
| PTCH2   | -0.23174 | 1.04E-07 | 3.56E-07 |
| PTCHD1  | -0.3305  | 1.37E-14 | 9.59E-14 |
| PTCHD2  | -0.07501 | 8.90E-02 | 1.24E-01 |
| PTCHD3  | 0.004966 | 9.10E-01 | 9.28E-01 |
| PTCRA   | -0.20067 | 4.44E-06 | 1.25E-05 |
| PTDSS1  | 0.320006 | 9.99E-14 | 6.47E-13 |
| PTDSS2  | -0.07598 | 8.50E-02 | 1.19E-01 |
| PTENP1  | -0.02832 | 5.21E-01 | 5.85E-01 |
| PTEN    | -0.18236 | 3.14E-05 | 7.83E-05 |
| PTER    | 0.071915 | 1.03E-01 | 1.41E-01 |
| PTF1A   | 0.128801 | 3.41E-03 | 6.29E-03 |
| PTGDR   | -0.09354 | 3.38E-02 | 5.17E-02 |
| PTGDS   | -0.41276 | 1.32E-22 | 1.91E-21 |
| PTGER1  | -0.18165 | 3.37E-05 | 8.38E-05 |
| PTGER2  | -0.17012 | 1.05E-04 | 2.43E-04 |
| PTGER3  | -0.23893 | 4.05E-08 | 1.44E-07 |
| PTGER4  | -0.21288 | 1.09E-06 | 3.27E-06 |
| PTGES2  | 0.214598 | 8.85E-07 | 2.70E-06 |
| PTGES3  | 0.465161 | 5.19E-29 | 1.25E-27 |
| PTGES   | 0.10986  | 1.26E-02 | 2.10E-02 |
| PTGFRN  | 0.167231 | 1.37E-04 | 3.14E-04 |
| PTGFR   | -0.22812 | 1.66E-07 | 5.54E-07 |
| PTGIR   | -0.28568 | 3.96E-11 | 1.95E-10 |
| PTGIS   | -0.11164 | 1.12E-02 | 1.89E-02 |
| PTGR1   | 0.136832 | 1.86E-03 | 3.58E-03 |
| PTGR2   | -0.09967 | 2.37E-02 | 3.74E-02 |
| PTGS1   | -0.08779 | 4.64E-02 | 6.89E-02 |
| PTGS2   | 0.125421 | 4.36E-03 | 7.91E-03 |
| PTH1R   | -0.482   | 2.56E-31 | 7.18E-30 |
| PTH2R   | 0.119079 | 6.82E-03 | 1.19E-02 |
| PTH2    | 0.119067 | 6.83E-03 | 1.19E-02 |
| PTHLH   | 0.311568 | 4.68E-13 | 2.85E-12 |

|         |          |          |          |
|---------|----------|----------|----------|
| PTH     | -0.01836 | 6.78E-01 | 7.28E-01 |
| PTK2B   | -0.34012 | 2.06E-15 | 1.55E-14 |
| PTK2    | -0.08058 | 6.77E-02 | 9.73E-02 |
| PTK6    | -0.2409  | 3.11E-08 | 1.12E-07 |
| PTK7    | -0.31365 | 3.21E-13 | 1.99E-12 |
| PTMA    | 0.345528 | 6.91E-16 | 5.51E-15 |
| PTMS    | 0.110437 | 1.21E-02 | 2.03E-02 |
| PTN     | -0.30977 | 6.46E-13 | 3.87E-12 |
| PTOV1   | -0.02964 | 5.02E-01 | 5.67E-01 |
| PTP4A1  | 0.065891 | 1.35E-01 | 1.81E-01 |
| PTP4A2  | 0.224051 | 2.78E-07 | 9.05E-07 |
| PTP4A3  | -0.12463 | 4.62E-03 | 8.34E-03 |
| PTPDC1  | 0.035601 | 4.20E-01 | 4.86E-01 |
| PTPLAD1 | 0.102677 | 1.98E-02 | 3.17E-02 |
| PTPLAD2 | -0.20932 | 1.65E-06 | 4.87E-06 |
| PTPLA   | 0.023026 | 6.02E-01 | 6.60E-01 |
| PTPLB   | 0.210979 | 1.36E-06 | 4.06E-06 |
| PTPMT1  | -0.08788 | 4.62E-02 | 6.87E-02 |
| PTPN11  | 0.292664 | 1.25E-11 | 6.51E-11 |
| PTPN12  | 0.171004 | 9.62E-05 | 2.25E-04 |
| PTPN13  | -0.3727  | 2.05E-18 | 2.07E-17 |
| PTPN14  | -0.0234  | 5.96E-01 | 6.54E-01 |
| PTPN18  | -0.30151 | 2.77E-12 | 1.56E-11 |
| PTPN1   | -0.00823 | 8.52E-01 | 8.79E-01 |
| PTPN20A | 0.012056 | 7.85E-01 | 8.22E-01 |
| PTPN20B | 0.032417 | 4.63E-01 | 5.29E-01 |
| PTPN21  | -0.38243 | 2.21E-19 | 2.45E-18 |
| PTPN22  | -0.03296 | 4.55E-01 | 5.22E-01 |
| PTPN23  | -0.13107 | 2.88E-03 | 5.38E-03 |
| PTPN2   | 0.188776 | 1.61E-05 | 4.21E-05 |
| PTPN3   | -0.21153 | 1.27E-06 | 3.81E-06 |
| PTPN4   | -0.16143 | 2.34E-04 | 5.18E-04 |
| PTPN5   | -0.13516 | 2.11E-03 | 4.02E-03 |
| PTPN6   | -0.09744 | 2.70E-02 | 4.21E-02 |
| PTPN7   | 0.008629 | 8.45E-01 | 8.73E-01 |
| PTPN9   | -0.01286 | 7.71E-01 | 8.10E-01 |
| PTPRA   | -0.21047 | 1.45E-06 | 4.29E-06 |
| PTPRB   | -0.34697 | 5.14E-16 | 4.15E-15 |
| PTPRCAP | -0.07784 | 7.76E-02 | 1.10E-01 |
| PTPRC   | -0.08413 | 5.64E-02 | 8.23E-02 |
| PTPRD   | -0.25759 | 3.00E-09 | 1.21E-08 |
| PTPRE   | -0.45217 | 2.56E-27 | 5.42E-26 |
| PTPRF   | -0.04207 | 3.41E-01 | 4.06E-01 |
| PTPRG   | -0.13877 | 1.60E-03 | 3.10E-03 |

|         |          |          |          |
|---------|----------|----------|----------|
| PTPRH   | 0.317657 | 1.54E-13 | 9.83E-13 |
| PTPRJ   | -0.10904 | 1.33E-02 | 2.21E-02 |
| PTPRK   | -0.05957 | 1.77E-01 | 2.29E-01 |
| PTPRM   | -0.34257 | 1.26E-15 | 9.73E-15 |
| PTPRN2  | -0.20861 | 1.79E-06 | 5.28E-06 |
| PTPRN   | 0.398854 | 4.37E-21 | 5.62E-20 |
| PTPRO   | -0.06477 | 1.42E-01 | 1.88E-01 |
| PTPRQ   | -0.22539 | 2.35E-07 | 7.71E-07 |
| PTPRR   | -0.04134 | 3.49E-01 | 4.15E-01 |
| PTPRS   | -0.21148 | 1.28E-06 | 3.83E-06 |
| PTPRT   | -0.3431  | 1.13E-15 | 8.79E-15 |
| PTPRU   | -0.45153 | 3.09E-27 | 6.51E-26 |
| PTPRVP  | -0.10181 | 2.08E-02 | 3.32E-02 |
| PTPRZ1  | -0.18922 | 1.54E-05 | 4.03E-05 |
| PTRF    | -0.17547 | 6.24E-05 | 1.50E-04 |
| PTRH1   | -0.15736 | 3.37E-04 | 7.28E-04 |
| PTRH2   | 0.36798  | 5.85E-18 | 5.66E-17 |
| PTS     | 0.301614 | 2.72E-12 | 1.53E-11 |
| PTTG1IP | -0.10378 | 1.85E-02 | 2.98E-02 |
| PTTG1   | 0.705968 | 6.93E-79 | 8.34E-77 |
| PTTG2   | 0.260379 | 1.99E-09 | 8.23E-09 |
| PTTG3P  | 0.50209  | 3.06E-34 | 1.01E-32 |
| PTX3    | 0.03     | 4.97E-01 | 5.62E-01 |
| PTX4    | -0.04154 | 3.47E-01 | 4.13E-01 |
| PUF60   | 0.210606 | 1.42E-06 | 4.22E-06 |
| PUM1    | -0.13343 | 2.41E-03 | 4.55E-03 |
| PUM2    | -0.04468 | 3.12E-01 | 3.76E-01 |
| PURA    | -0.1932  | 1.01E-05 | 2.70E-05 |
| PURB    | 0.128438 | 3.50E-03 | 6.45E-03 |
| PURG    | -0.11826 | 7.22E-03 | 1.26E-02 |
| PUS10   | -0.35483 | 1.00E-16 | 8.67E-16 |
| PUS1    | 0.350498 | 2.48E-16 | 2.07E-15 |
| PUS3    | 0.105446 | 1.67E-02 | 2.71E-02 |
| PUS7L   | 0.397978 | 5.42E-21 | 6.91E-20 |
| PUS7    | 0.388029 | 5.95E-20 | 6.92E-19 |
| PUSL1   | 0.088362 | 4.50E-02 | 6.71E-02 |
| PVALB   | -0.14512 | 9.58E-04 | 1.93E-03 |
| PVRIG   | -0.09678 | 2.81E-02 | 4.36E-02 |
| PVRL1   | 0.025881 | 5.58E-01 | 6.19E-01 |
| PVRL2   | 0.12518  | 4.44E-03 | 8.04E-03 |
| PVRL3   | -0.12731 | 3.81E-03 | 6.96E-03 |
| PVRL4   | -0.27072 | 4.22E-10 | 1.89E-09 |
| PVR     | 0.300312 | 3.41E-12 | 1.89E-11 |
| PVT1    | 0.05406  | 2.21E-01 | 2.78E-01 |

|           |          |          |          |
|-----------|----------|----------|----------|
| PWP1      | 0.46914  | 1.52E-29 | 3.80E-28 |
| PWP2      | 0.124138 | 4.78E-03 | 8.62E-03 |
| PWRN1     | -0.13374 | 2.36E-03 | 4.45E-03 |
| PWRN2     | -0.04291 | 3.31E-01 | 3.97E-01 |
| PWWP2A    | -0.23029 | 1.26E-07 | 4.26E-07 |
| PWWP2B    | -0.1942  | 9.05E-06 | 2.44E-05 |
| PXDNL     | 0.093044 | 3.48E-02 | 5.30E-02 |
| PXDN      | 0.223346 | 3.04E-07 | 9.83E-07 |
| PXK       | -0.06747 | 1.26E-01 | 1.70E-01 |
| PXMP2     | 0.249502 | 9.50E-09 | 3.64E-08 |
| PXMP4     | -0.49358 | 5.59E-33 | 1.72E-31 |
| PXN       | 0.039571 | 3.70E-01 | 4.36E-01 |
| PXT1      | -0.03778 | 3.92E-01 | 4.59E-01 |
| PYCARD    | -0.03797 | 3.90E-01 | 4.56E-01 |
| PYCR1     | 0.28766  | 2.87E-11 | 1.44E-10 |
| PYCR2     | -0.30739 | 9.87E-13 | 5.80E-12 |
| PYCRL     | 0.145791 | 9.06E-04 | 1.83E-03 |
| PYDC1     | 0.117289 | 7.71E-03 | 1.34E-02 |
| PYGB      | -0.14765 | 7.76E-04 | 1.59E-03 |
| PYGL      | 0.400924 | 2.62E-21 | 3.42E-20 |
| PYGM      | -0.37217 | 2.31E-18 | 2.33E-17 |
| PYGO1     | 0.097809 | 2.64E-02 | 4.13E-02 |
| PYGO2     | -0.03941 | 3.72E-01 | 4.38E-01 |
| PYHIN1    | -0.04802 | 2.77E-01 | 3.39E-01 |
| PYROXD1   | 0.103948 | 1.83E-02 | 2.95E-02 |
| PYROXD2   | -0.47995 | 4.97E-31 | 1.37E-29 |
| PYY2      | 0.177687 | 5.02E-05 | 1.22E-04 |
| PYY       | 0.078893 | 7.36E-02 | 1.05E-01 |
| PZP       | -0.24403 | 2.03E-08 | 7.46E-08 |
| ProSAPiP1 | -0.3547  | 1.03E-16 | 8.89E-16 |
| QARS      | -0.23402 | 7.76E-08 | 2.68E-07 |
| QDPR      | -0.14987 | 6.45E-04 | 1.33E-03 |
| QKI       | -0.01108 | 8.02E-01 | 8.37E-01 |
| QPCTL     | -0.01455 | 7.42E-01 | 7.85E-01 |
| QPCT      | 0.308842 | 7.63E-13 | 4.53E-12 |
| QPRT      | 0.127525 | 3.75E-03 | 6.86E-03 |
| QRFPR     | 0.044375 | 3.15E-01 | 3.79E-01 |
| QRFP      | -0.03225 | 4.65E-01 | 5.31E-01 |
| QRICH1    | -0.07001 | 1.13E-01 | 1.53E-01 |
| QRICH2    | 0.036377 | 4.10E-01 | 4.76E-01 |
| QRSL1     | 0.225484 | 2.32E-07 | 7.62E-07 |
| QSER1     | 0.274761 | 2.26E-10 | 1.04E-09 |
| QSOX1     | -0.19737 | 6.41E-06 | 1.76E-05 |
| QSOX2     | 0.298317 | 4.80E-12 | 2.62E-11 |

|           |          |          |          |
|-----------|----------|----------|----------|
| QTRT1     | -0.14861 | 7.17E-04 | 1.47E-03 |
| QTRTD1    | 0.29935  | 4.02E-12 | 2.22E-11 |
| R3HCC1    | -0.07409 | 9.30E-02 | 1.29E-01 |
| R3HDM1    | 0.624062 | 6.13E-57 | 4.98E-55 |
| R3HDM2    | -0.05595 | 2.05E-01 | 2.60E-01 |
| R3HDML    | 0.037814 | 3.92E-01 | 4.59E-01 |
| RAB10     | 0.563063 | 2.07E-44 | 1.18E-42 |
| RAB11A    | 0.162727 | 2.08E-04 | 4.65E-04 |
| RAB11B    | -0.21072 | 1.40E-06 | 4.17E-06 |
| RAB11FIP1 | -0.20178 | 3.92E-06 | 1.11E-05 |
| RAB11FIP2 | -0.28474 | 4.62E-11 | 2.26E-10 |
| RAB11FIP3 | -0.36785 | 6.02E-18 | 5.81E-17 |
| RAB11FIP4 | -0.19659 | 6.97E-06 | 1.91E-05 |
| RAB11FIP5 | -0.08527 | 5.31E-02 | 7.79E-02 |
| RAB12     | -0.07548 | 8.70E-02 | 1.22E-01 |
| RAB13     | -0.04599 | 2.98E-01 | 3.61E-01 |
| RAB14     | -0.19089 | 1.29E-05 | 3.40E-05 |
| RAB15     | 0.025982 | 5.56E-01 | 6.18E-01 |
| RAB17     | -0.38339 | 1.77E-19 | 1.98E-18 |
| RAB18     | 0.097159 | 2.75E-02 | 4.27E-02 |
| RAB19     | 0.024138 | 5.85E-01 | 6.44E-01 |
| RAB1A     | 0.24522  | 1.72E-08 | 6.39E-08 |
| RAB1B     | -0.04834 | 2.73E-01 | 3.35E-01 |
| RAB20     | -0.20491 | 2.75E-06 | 7.90E-06 |
| RAB21     | 0.140849 | 1.35E-03 | 2.66E-03 |
| RAB22A    | 0.109989 | 1.25E-02 | 2.09E-02 |
| RAB23     | 0.271006 | 4.04E-10 | 1.81E-09 |
| RAB24     | -0.12598 | 4.19E-03 | 7.62E-03 |
| RAB25     | -0.19048 | 1.35E-05 | 3.54E-05 |
| RAB26     | -0.00956 | 8.29E-01 | 8.59E-01 |
| RAB27A    | -0.32831 | 2.08E-14 | 1.44E-13 |
| RAB27B    | 0.027171 | 5.38E-01 | 6.01E-01 |
| RAB28     | -0.00671 | 8.79E-01 | 9.02E-01 |
| RAB2A     | 0.137725 | 1.73E-03 | 3.35E-03 |
| RAB2B     | -0.06026 | 1.72E-01 | 2.24E-01 |
| RAB30     | 0.012407 | 7.79E-01 | 8.16E-01 |
| RAB31     | 0.017752 | 6.88E-01 | 7.37E-01 |
| RAB32     | 0.187887 | 1.77E-05 | 4.60E-05 |
| RAB33A    | 0.085415 | 5.27E-02 | 7.74E-02 |
| RAB33B    | -0.04779 | 2.79E-01 | 3.41E-01 |
| RAB34     | 0.050142 | 2.56E-01 | 3.17E-01 |
| RAB35     | 0.357196 | 6.07E-17 | 5.39E-16 |
| RAB36     | -0.30315 | 2.08E-12 | 1.19E-11 |
| RAB37     | -0.21092 | 1.37E-06 | 4.08E-06 |

|          |          |          |          |
|----------|----------|----------|----------|
| RAB38    | -0.08848 | 4.47E-02 | 6.67E-02 |
| RAB39B   | 0.158417 | 3.07E-04 | 6.67E-04 |
| RAB39    | 0.250128 | 8.70E-09 | 3.34E-08 |
| RAB3A    | -0.09737 | 2.71E-02 | 4.23E-02 |
| RAB3B    | 0.484374 | 1.18E-31 | 3.38E-30 |
| RAB3C    | -0.04897 | 2.67E-01 | 3.29E-01 |
| RAB3D    | -0.09525 | 3.07E-02 | 4.73E-02 |
| RAB3GAP1 | -0.01084 | 8.06E-01 | 8.40E-01 |
| RAB3GAP2 | -0.0431  | 3.29E-01 | 3.94E-01 |
| RAB3IL1  | 0.066388 | 1.32E-01 | 1.77E-01 |
| RAB3IP   | 0.003725 | 9.33E-01 | 9.47E-01 |
| RAB40AL  | -0.16142 | 2.35E-04 | 5.19E-04 |
| RAB40A   | -0.20203 | 3.81E-06 | 1.08E-05 |
| RAB40B   | -0.35743 | 5.78E-17 | 5.15E-16 |
| RAB40C   | -0.38858 | 5.23E-20 | 6.11E-19 |
| RAB41    | -0.09096 | 3.91E-02 | 5.89E-02 |
| RAB42    | 0.215138 | 8.30E-07 | 2.54E-06 |
| RAB43    | -0.19292 | 1.04E-05 | 2.77E-05 |
| RAB4A    | -0.33595 | 4.72E-15 | 3.47E-14 |
| RAB4B    | -0.24999 | 8.87E-09 | 3.40E-08 |
| RAB5A    | -0.056   | 2.05E-01 | 2.60E-01 |
| RAB5B    | -0.20192 | 3.86E-06 | 1.09E-05 |
| RAB5C    | 0.18739  | 1.87E-05 | 4.82E-05 |
| RAB6A    | 0.252845 | 5.93E-09 | 2.32E-08 |
| RAB6B    | 0.163432 | 1.95E-04 | 4.37E-04 |
| RAB6C    | 0.085114 | 5.36E-02 | 7.85E-02 |
| RAB7A    | 0.285946 | 3.79E-11 | 1.87E-10 |
| RAB7L1   | -0.08263 | 6.10E-02 | 8.84E-02 |
| RAB8A    | 0.194312 | 8.94E-06 | 2.41E-05 |
| RAB8B    | 0.062661 | 1.56E-01 | 2.04E-01 |
| RAB9A    | -0.07183 | 1.04E-01 | 1.42E-01 |
| RAB9BP1  | 0.110355 | 1.22E-02 | 2.04E-02 |
| RAB9B    | -0.04006 | 3.64E-01 | 4.31E-01 |
| RABAC1   | -0.11002 | 1.25E-02 | 2.08E-02 |
| RABEP1   | -0.13551 | 2.06E-03 | 3.93E-03 |
| RABEP2   | -0.29597 | 7.15E-12 | 3.83E-11 |
| RABEPK   | 0.218497 | 5.53E-07 | 1.73E-06 |
| RABGAP1L | -0.16775 | 1.31E-04 | 3.00E-04 |
| RABGAP1  | -0.27071 | 4.23E-10 | 1.89E-09 |
| RABGEF1  | 0.137127 | 1.81E-03 | 3.50E-03 |
| RABGGTA  | -0.06384 | 1.48E-01 | 1.95E-01 |
| RABGGTB  | 0.11633  | 8.23E-03 | 1.42E-02 |
| RABIF    | 0.076561 | 8.26E-02 | 1.16E-01 |
| RABL2A   | -0.40154 | 2.25E-21 | 2.95E-20 |

|          |          |           |           |
|----------|----------|-----------|-----------|
| RABL2B   | -0.32943 | 1.68E-14  | 1.17E-13  |
| RABL3    | 0.086331 | 5.02E-02  | 7.40E-02  |
| RABL5    | 0.059975 | 1.74E-01  | 2.26E-01  |
| RAC1     | 0.23809  | 4.53E-08  | 1.60E-07  |
| RAC2     | -0.04381 | 3.21E-01  | 3.86E-01  |
| RAC3     | 0.275164 | 2.12E-10  | 9.80E-10  |
| RACGAP1P | 0.53874  | 4.20E-40  | 1.98E-38  |
| RACGAP1  | 0.84483  | 1.90E-141 | 8.09E-139 |
| RAD17    | -0.10389 | 1.84E-02  | 2.96E-02  |
| RAD18    | 0.484753 | 1.05E-31  | 3.00E-30  |
| RAD1     | 0.106948 | 1.52E-02  | 2.49E-02  |
| RAD21L1  | 0.177548 | 5.09E-05  | 1.24E-04  |
| RAD21    | 0.353171 | 1.42E-16  | 1.21E-15  |
| RAD23A   | 0.156871 | 3.52E-04  | 7.58E-04  |
| RAD23B   | 0.37208  | 2.35E-18  | 2.37E-17  |
| RAD50    | 0.010661 | 8.09E-01  | 8.42E-01  |
| RAD51AP1 | 0.828749 | 1.98E-131 | 6.01E-129 |
| RAD51AP2 | -0.01108 | 8.02E-01  | 8.37E-01  |
| RAD51C   | 0.450514 | 4.16E-27  | 8.64E-26  |
| RAD51L1  | 0.024393 | 5.81E-01  | 6.40E-01  |
| RAD51L3  | 0.323681 | 5.02E-14  | 3.35E-13  |
| RAD51    | 0.849354 | 1.80E-144 | 8.35E-142 |
| RAD52    | 0.008763 | 8.43E-01  | 8.71E-01  |
| RAD54B   | 0.650302 | 3.12E-63  | 2.95E-61  |
| RAD54L2  | -0.05081 | 2.50E-01  | 3.10E-01  |
| RAD54L   | 0.836595 | 3.51E-136 | 1.15E-133 |
| RAD9A    | 0.127625 | 3.72E-03  | 6.82E-03  |
| RAD9B    | 0.224377 | 2.67E-07  | 8.71E-07  |
| RADIL    | -0.23802 | 4.58E-08  | 1.62E-07  |
| RAE1     | 0.406415 | 6.65E-22  | 9.08E-21  |
| RAET1E   | 0.248645 | 1.07E-08  | 4.07E-08  |
| RAET1G   | 0.220479 | 4.33E-07  | 1.38E-06  |
| RAET1K   | 0.21872  | 5.38E-07  | 1.69E-06  |
| RAET1L   | 0.152666 | 5.08E-04  | 1.07E-03  |
| RAF1     | -0.12406 | 4.81E-03  | 8.67E-03  |
| RAG1AP1  | 0.081802 | 6.36E-02  | 9.19E-02  |
| RAG1     | 0.12082  | 6.05E-03  | 1.07E-02  |
| RAG2     | 0.003934 | 9.29E-01  | 9.43E-01  |
| RAGE     | -0.13269 | 2.55E-03  | 4.80E-03  |
| RAI14    | -0.01858 | 6.74E-01  | 7.25E-01  |
| RAI1     | -0.2059  | 2.45E-06  | 7.08E-06  |
| RAI2     | -0.48695 | 5.08E-32  | 1.48E-30  |
| RALA     | 0.400085 | 3.23E-21  | 4.18E-20  |
| RALBP1   | 0.12646  | 4.05E-03  | 7.38E-03  |



|          |          |          |          |
|----------|----------|----------|----------|
| RALB     | 0.268609 | 5.82E-10 | 2.56E-09 |
| RALGAPA1 | -0.14401 | 1.05E-03 | 2.10E-03 |
| RALGAPA2 | -0.21451 | 8.94E-07 | 2.72E-06 |
| RALGAPB  | 0.082111 | 6.26E-02 | 9.05E-02 |
| RALGDS   | -0.24729 | 1.29E-08 | 4.87E-08 |
| RALGPS1  | -0.47255 | 5.23E-30 | 1.34E-28 |
| RALGPS2  | 0.292323 | 1.32E-11 | 6.88E-11 |
| RALYL    | 0.069061 | 1.18E-01 | 1.59E-01 |
| RALY     | 0.089822 | 4.16E-02 | 6.24E-02 |
| RAMP1    | -0.00182 | 9.67E-01 | 9.75E-01 |
| RAMP2    | -0.30688 | 1.08E-12 | 6.32E-12 |
| RAMP3    | -0.381   | 3.08E-19 | 3.36E-18 |
| RANBP10  | -0.16831 | 1.24E-04 | 2.86E-04 |
| RANBP17  | -0.238   | 4.58E-08 | 1.62E-07 |
| RANBP1   | 0.63534  | 1.44E-59 | 1.22E-57 |
| RANBP2   | -0.03081 | 4.85E-01 | 5.50E-01 |
| RANBP3L  | -0.32853 | 2.00E-14 | 1.38E-13 |
| RANBP3   | -0.15625 | 3.72E-04 | 7.98E-04 |
| RANBP6   | 0.001989 | 9.64E-01 | 9.72E-01 |
| RANBP9   | -0.13671 | 1.87E-03 | 3.61E-03 |
| RANGAP1  | 0.376898 | 7.91E-19 | 8.27E-18 |
| RANGRF   | -0.20062 | 4.46E-06 | 1.25E-05 |
| RAN      | 0.63088  | 1.62E-58 | 1.36E-56 |
| RAP1A    | -0.0571  | 1.96E-01 | 2.50E-01 |
| RAP1B    | 0.222084 | 3.56E-07 | 1.14E-06 |
| RAP1GAP2 | 0.054721 | 2.15E-01 | 2.72E-01 |
| RAP1GAP  | -0.49849 | 1.06E-33 | 3.38E-32 |
| RAP1GDS1 | 0.17129  | 9.36E-05 | 2.19E-04 |
| RAP2A    | 0.22921  | 1.45E-07 | 4.86E-07 |
| RAP2B    | 0.18602  | 2.15E-05 | 5.51E-05 |
| RAP2C    | 0.301266 | 2.89E-12 | 1.62E-11 |
| RAPGEF1  | -0.10571 | 1.64E-02 | 2.67E-02 |
| RAPGEF2  | -0.3596  | 3.63E-17 | 3.31E-16 |
| RAPGEF3  | -0.41971 | 2.16E-23 | 3.36E-22 |
| RAPGEF4  | -0.1627  | 2.09E-04 | 4.66E-04 |
| RAPGEF5  | -0.34188 | 1.45E-15 | 1.11E-14 |
| RAPGEF6  | -0.06971 | 1.14E-01 | 1.55E-01 |
| RAPGEFL1 | -0.00933 | 8.33E-01 | 8.62E-01 |
| RAPH1    | -0.17726 | 5.23E-05 | 1.27E-04 |
| RAPSN    | -0.04959 | 2.61E-01 | 3.22E-01 |
| RARA     | -0.26501 | 1.00E-09 | 4.29E-09 |
| RARB     | -0.0314  | 4.77E-01 | 5.42E-01 |
| RARG     | -0.04277 | 3.33E-01 | 3.98E-01 |
| RARRES1  | 0.161069 | 2.42E-04 | 5.35E-04 |

|          |          |          |          |
|----------|----------|----------|----------|
| RARRES2  | -0.08816 | 4.55E-02 | 6.78E-02 |
| RARRES3  | -0.09068 | 3.97E-02 | 5.98E-02 |
| RARS2    | 0.160591 | 2.53E-04 | 5.56E-04 |
| RARS     | 0.38487  | 1.25E-19 | 1.41E-18 |
| RASA1    | -0.06884 | 1.19E-01 | 1.60E-01 |
| RASA2    | 0.098546 | 2.53E-02 | 3.97E-02 |
| RASA3    | -0.0085  | 8.47E-01 | 8.75E-01 |
| RASA4P   | -0.19167 | 1.19E-05 | 3.15E-05 |
| RASA4    | -0.06522 | 1.39E-01 | 1.85E-01 |
| RASAL1   | 0.078342 | 7.57E-02 | 1.08E-01 |
| RASAL2   | 0.196339 | 7.17E-06 | 1.96E-05 |
| RASAL3   | -0.18186 | 3.30E-05 | 8.21E-05 |
| RASD1    | -0.24122 | 2.97E-08 | 1.07E-07 |
| RASD2    | 0.034914 | 4.29E-01 | 4.95E-01 |
| RASEF    | -0.08211 | 6.26E-02 | 9.05E-02 |
| RASGEF1A | -0.03734 | 3.98E-01 | 4.64E-01 |
| RASGEF1B | -0.12207 | 5.54E-03 | 9.87E-03 |
| RASGEF1C | 0.140886 | 1.35E-03 | 2.66E-03 |
| RASGRF1  | -0.36269 | 1.86E-17 | 1.74E-16 |
| RASGRF2  | -0.03858 | 3.82E-01 | 4.49E-01 |
| RASGRP1  | -0.18236 | 3.14E-05 | 7.83E-05 |
| RASGRP2  | -0.35522 | 9.23E-17 | 8.03E-16 |
| RASGRP3  | -0.04014 | 3.63E-01 | 4.30E-01 |
| RASGRP4  | -0.32604 | 3.21E-14 | 2.18E-13 |
| RASIP1   | -0.19313 | 1.02E-05 | 2.71E-05 |
| RASL10A  | -0.09849 | 2.54E-02 | 3.98E-02 |
| RASL10B  | 0.15442  | 4.37E-04 | 9.25E-04 |
| RASL11A  | -0.29952 | 3.91E-12 | 2.16E-11 |
| RASL11B  | -0.21177 | 1.24E-06 | 3.71E-06 |
| RASL12   | -0.30148 | 2.78E-12 | 1.56E-11 |
| RASSF10  | -0.27574 | 1.94E-10 | 8.99E-10 |
| RASSF1   | -0.15399 | 4.53E-04 | 9.57E-04 |
| RASSF2   | -0.26    | 2.11E-09 | 8.68E-09 |
| RASSF3   | 0.053072 | 2.29E-01 | 2.88E-01 |
| RASSF4   | -0.0835  | 5.83E-02 | 8.48E-02 |
| RASSF5   | -0.40948 | 3.06E-22 | 4.29E-21 |
| RASSF6   | 0.079413 | 7.18E-02 | 1.03E-01 |
| RASSF7   | -0.40386 | 1.26E-21 | 1.68E-20 |
| RASSF8   | 0.026369 | 5.50E-01 | 6.12E-01 |
| RASSF9   | -0.01716 | 6.98E-01 | 7.46E-01 |
| RAVER1   | 0.113755 | 9.78E-03 | 1.66E-02 |
| RAVER2   | -0.09244 | 3.60E-02 | 5.46E-02 |
| RAX2     | -0.00616 | 8.89E-01 | 9.10E-01 |
| RAX      | 0.240269 | 3.38E-08 | 1.21E-07 |

|        |          |          |          |
|--------|----------|----------|----------|
| RB1CC1 | 0.06215  | 1.59E-01 | 2.08E-01 |
| RB1    | -0.01212 | 7.84E-01 | 8.21E-01 |
| RBAK   | -0.00219 | 9.60E-01 | 9.69E-01 |
| RBBP4  | 0.178558 | 4.60E-05 | 1.13E-04 |
| RBBP5  | 0.124794 | 4.56E-03 | 8.25E-03 |
| RBBP6  | -0.05099 | 2.48E-01 | 3.08E-01 |
| RBBP7  | 0.386679 | 8.19E-20 | 9.39E-19 |
| RBBP8  | 0.389767 | 3.94E-20 | 4.65E-19 |
| RBBP9  | -0.16868 | 1.20E-04 | 2.76E-04 |
| RBCK1  | 0.003273 | 9.41E-01 | 9.54E-01 |
| RBKS   | -0.12744 | 3.77E-03 | 6.90E-03 |
| RBL1   | 0.595509 | 9.68E-51 | 6.67E-49 |
| RBL2   | -0.48135 | 3.16E-31 | 8.79E-30 |
| RBM10  | 0.024101 | 5.85E-01 | 6.44E-01 |
| RBM11  | -0.0062  | 8.88E-01 | 9.10E-01 |
| RBM12B | 0.089216 | 4.30E-02 | 6.43E-02 |
| RBM12  | 0.260339 | 2.01E-09 | 8.28E-09 |
| RBM14  | 0.192046 | 1.14E-05 | 3.03E-05 |
| RBM15B | -0.02414 | 5.85E-01 | 6.44E-01 |
| RBM15  | 0.225328 | 2.37E-07 | 7.77E-07 |
| RBM16  | -0.02822 | 5.23E-01 | 5.87E-01 |
| RBM17  | 0.345413 | 7.07E-16 | 5.63E-15 |
| RBM18  | 0.088271 | 4.53E-02 | 6.74E-02 |
| RBM19  | 0.143232 | 1.12E-03 | 2.23E-03 |
| RBM20  | -0.03731 | 3.98E-01 | 4.65E-01 |
| RBM22  | -0.06468 | 1.43E-01 | 1.89E-01 |
| RBM23  | -0.00822 | 8.52E-01 | 8.80E-01 |
| RBM24  | -0.02181 | 6.21E-01 | 6.78E-01 |
| RBM25  | -0.03706 | 4.01E-01 | 4.68E-01 |
| RBM26  | 0.021686 | 6.23E-01 | 6.79E-01 |
| RBM27  | 0.148687 | 7.12E-04 | 1.46E-03 |
| RBM28  | 0.513253 | 5.95E-36 | 2.15E-34 |
| RBM33  | -0.20079 | 4.38E-06 | 1.23E-05 |
| RBM34  | 0.13587  | 2.00E-03 | 3.83E-03 |
| RBM38  | 0.087089 | 4.82E-02 | 7.13E-02 |
| RBM39  | -0.14925 | 6.79E-04 | 1.40E-03 |
| RBM3   | -0.03696 | 4.03E-01 | 4.69E-01 |
| RBM41  | 0.130589 | 2.99E-03 | 5.56E-03 |
| RBM42  | 0.244866 | 1.81E-08 | 6.70E-08 |
| RBM43  | -0.27209 | 3.42E-10 | 1.54E-09 |
| RBM44  | -0.08115 | 6.57E-02 | 9.47E-02 |
| RBM45  | 0.214603 | 8.85E-07 | 2.70E-06 |
| RBM46  | 0.028317 | 5.21E-01 | 5.85E-01 |
| RBM47  | -0.1703  | 1.03E-04 | 2.40E-04 |

|          |          |          |          |
|----------|----------|----------|----------|
| RBM4B    | -0.05657 | 2.00E-01 | 2.55E-01 |
| RBM4     | 0.156812 | 3.54E-04 | 7.62E-04 |
| RBM5     | -0.41223 | 1.51E-22 | 2.18E-21 |
| RBM6     | -0.2685  | 5.93E-10 | 2.61E-09 |
| RBM7     | 0.14109  | 1.33E-03 | 2.62E-03 |
| RBM8A    | 0.21445  | 9.01E-07 | 2.74E-06 |
| RBM9     | -0.11339 | 1.00E-02 | 1.70E-02 |
| RBMS1    | -0.04502 | 3.08E-01 | 3.72E-01 |
| RBMS2    | -0.39918 | 4.03E-21 | 5.19E-20 |
| RBMS3    | -0.31426 | 2.87E-13 | 1.79E-12 |
| RBMX2    | 0.214719 | 8.73E-07 | 2.66E-06 |
| RBMXL1   | 0.136735 | 1.87E-03 | 3.60E-03 |
| RBMXL2   | -0.12408 | 4.81E-03 | 8.66E-03 |
| RBMXL3   | 0.010737 | 8.08E-01 | 8.41E-01 |
| RBMX     | 0.182629 | 3.05E-05 | 7.64E-05 |
| RBMX1A1  | 0.059388 | 1.78E-01 | 2.31E-01 |
| RBMX1A3P | 0.044646 | 3.12E-01 | 3.76E-01 |
| RBMX1B   | 0.082874 | 6.02E-02 | 8.74E-02 |
| RBMX1E   | -0.03185 | 4.71E-01 | 5.36E-01 |
| RBMX1F   | 0.029245 | 5.08E-01 | 5.72E-01 |
| RBMX1J   | 0.042561 | 3.35E-01 | 4.01E-01 |
| RBMX2EP  | 0.094096 | 3.28E-02 | 5.02E-02 |
| RBMX2FP  | 0.037465 | 3.96E-01 | 4.63E-01 |
| RBP1     | 0.158059 | 3.17E-04 | 6.87E-04 |
| RBP2     | -0.15769 | 3.28E-04 | 7.08E-04 |
| RBP3     | 0.152828 | 5.01E-04 | 1.05E-03 |
| RBP4     | -0.04959 | 2.61E-01 | 3.23E-01 |
| RBP5     | -0.29284 | 1.21E-11 | 6.33E-11 |
| RBP7     | -0.05042 | 2.53E-01 | 3.14E-01 |
| RBPJL    | 0.098136 | 2.59E-02 | 4.06E-02 |
| RBPJ     | -0.04804 | 2.76E-01 | 3.39E-01 |
| RBPMS2   | 0.208241 | 1.87E-06 | 5.49E-06 |
| RBPMS    | -0.53657 | 9.79E-40 | 4.48E-38 |
| RBX1     | 0.063672 | 1.49E-01 | 1.97E-01 |
| RC3H1    | -0.35401 | 1.19E-16 | 1.02E-15 |
| RC3H2    | 0.185308 | 2.32E-05 | 5.91E-05 |
| RCAN1    | -0.21625 | 7.26E-07 | 2.24E-06 |
| RCAN2    | -0.44791 | 8.86E-27 | 1.80E-25 |
| RCAN3    | 0.153265 | 4.82E-04 | 1.01E-03 |
| RCBTB1   | -0.01601 | 7.17E-01 | 7.64E-01 |
| RCBTB2   | -0.32024 | 9.56E-14 | 6.20E-13 |
| RCC1     | 0.381942 | 2.48E-19 | 2.73E-18 |
| RCC2     | 0.35505  | 9.57E-17 | 8.31E-16 |
| RCCD1    | 0.303986 | 1.80E-12 | 1.03E-11 |

|        |          |          |          |
|--------|----------|----------|----------|
| RCE1   | 0.303936 | 1.81E-12 | 1.04E-11 |
| RCHY1  | -0.05821 | 1.87E-01 | 2.41E-01 |
| RCL1   | 0.004101 | 9.26E-01 | 9.41E-01 |
| RCN1   | 0.244664 | 1.86E-08 | 6.88E-08 |
| RCN2   | 0.155836 | 3.86E-04 | 8.25E-04 |
| RCN3   | 0.087872 | 4.62E-02 | 6.87E-02 |
| RCOR1  | -0.04108 | 3.52E-01 | 4.18E-01 |
| RCOR2  | 0.370702 | 3.20E-18 | 3.18E-17 |
| RCOR3  | -0.43104 | 1.03E-24 | 1.78E-23 |
| RCSD1  | -0.22087 | 4.13E-07 | 1.31E-06 |
| RCVRN  | -0.12679 | 3.95E-03 | 7.21E-03 |
| RD3    | -0.15947 | 2.80E-04 | 6.11E-04 |
| RDBP   | 0.343132 | 1.12E-15 | 8.74E-15 |
| RDH10  | 0.057995 | 1.89E-01 | 2.42E-01 |
| RDH11  | 0.337513 | 3.46E-15 | 2.57E-14 |
| RDH12  | 0.150334 | 6.20E-04 | 1.29E-03 |
| RDH13  | -0.1456  | 9.20E-04 | 1.86E-03 |
| RDH14  | 0.023386 | 5.96E-01 | 6.54E-01 |
| RDH16  | 0.101344 | 2.14E-02 | 3.41E-02 |
| RDH5   | -0.01474 | 7.39E-01 | 7.82E-01 |
| RDH8   | 0.133258 | 2.44E-03 | 4.61E-03 |
| RDM1   | 0.639114 | 1.79E-60 | 1.56E-58 |
| RDX    | 0.289216 | 2.22E-11 | 1.13E-10 |
| REC8   | -0.03706 | 4.01E-01 | 4.68E-01 |
| RECK   | -0.15042 | 6.15E-04 | 1.28E-03 |
| RECQL4 | 0.600113 | 1.07E-51 | 7.54E-50 |
| RECQL5 | -0.06025 | 1.72E-01 | 2.24E-01 |
| RECQL  | 0.513629 | 5.20E-36 | 1.89E-34 |
| REEP1  | -0.15213 | 5.32E-04 | 1.11E-03 |
| REEP2  | 0.284836 | 4.54E-11 | 2.23E-10 |
| REEP3  | 0.084239 | 5.61E-02 | 8.19E-02 |
| REEP4  | 0.265131 | 9.85E-10 | 4.22E-09 |
| REEP5  | -0.40463 | 1.04E-21 | 1.40E-20 |
| REEP6  | -0.10546 | 1.67E-02 | 2.71E-02 |
| REG1A  | -0.12139 | 5.81E-03 | 1.03E-02 |
| REG1B  | -0.00423 | 9.24E-01 | 9.39E-01 |
| REG1P  | 0.03976  | 3.68E-01 | 4.34E-01 |
| REG3A  | -0.02658 | 5.47E-01 | 6.09E-01 |
| REG3G  | 0.057098 | 1.96E-01 | 2.50E-01 |
| REG4   | 0.019585 | 6.57E-01 | 7.10E-01 |
| RELA   | 0.091414 | 3.81E-02 | 5.76E-02 |
| RELB   | 0.202488 | 3.62E-06 | 1.03E-05 |
| RELL1  | 0.152082 | 5.34E-04 | 1.12E-03 |
| RELL2  | 0.193035 | 1.03E-05 | 2.74E-05 |

|         |          |          |          |
|---------|----------|----------|----------|
| RELN    | -0.01322 | 7.65E-01 | 8.04E-01 |
| RELT    | 0.302556 | 2.31E-12 | 1.31E-11 |
| REL     | -0.09729 | 2.73E-02 | 4.24E-02 |
| REM1    | -0.3675  | 6.51E-18 | 6.27E-17 |
| REM2    | 0.01174  | 7.90E-01 | 8.27E-01 |
| RENBP   | -0.07321 | 9.70E-02 | 1.34E-01 |
| REN     | -0.04511 | 3.07E-01 | 3.71E-01 |
| REP15   | 0.07166  | 1.04E-01 | 1.43E-01 |
| REPIN1  | 0.072502 | 1.00E-01 | 1.38E-01 |
| REPS1   | 0.252039 | 6.65E-09 | 2.59E-08 |
| REPS2   | -0.43304 | 5.93E-25 | 1.04E-23 |
| RER1    | -0.09716 | 2.75E-02 | 4.27E-02 |
| RERE    | -0.27534 | 2.06E-10 | 9.54E-10 |
| RERGL   | -0.25516 | 4.26E-09 | 1.69E-08 |
| RERG    | -0.31417 | 2.92E-13 | 1.82E-12 |
| RESP18  | -0.027   | 5.41E-01 | 6.03E-01 |
| REST    | 0.048187 | 2.75E-01 | 3.37E-01 |
| RETNLB  | 0.204631 | 2.84E-06 | 8.14E-06 |
| RETN    | -0.2277  | 1.75E-07 | 5.83E-07 |
| RETSAT  | -0.25183 | 6.84E-09 | 2.66E-08 |
| RET     | -0.02762 | 5.32E-01 | 5.95E-01 |
| REV1    | -0.3938  | 1.50E-20 | 1.84E-19 |
| REV3L   | -0.26836 | 6.05E-10 | 2.65E-09 |
| REXO1L1 | -0.00609 | 8.90E-01 | 9.11E-01 |
| REXO1   | 0.055813 | 2.06E-01 | 2.62E-01 |
| REXO2   | 0.008318 | 8.51E-01 | 8.78E-01 |
| REXO4   | 0.150166 | 6.29E-04 | 1.30E-03 |
| RFC1    | 0.13526  | 2.10E-03 | 4.00E-03 |
| RFC2    | 0.625845 | 2.39E-57 | 1.96E-55 |
| RFC3    | 0.658224 | 2.95E-65 | 2.87E-63 |
| RFC4    | 0.731145 | 3.06E-87 | 4.13E-85 |
| RFC5    | 0.694444 | 2.37E-75 | 2.70E-73 |
| RFESD   | -0.02287 | 6.05E-01 | 6.62E-01 |
| RFFL    | 0.433156 | 5.74E-25 | 1.01E-23 |
| RFK     | 0.121997 | 5.57E-03 | 9.92E-03 |
| RFNG    | 0.013033 | 7.68E-01 | 8.07E-01 |
| RFPL1S  | 0.108729 | 1.36E-02 | 2.25E-02 |
| RFPL1   | 0.134245 | 2.27E-03 | 4.30E-03 |
| RFPL2   | -0.09153 | 3.79E-02 | 5.72E-02 |
| RFPL3S  | -0.13397 | 2.31E-03 | 4.38E-03 |
| RFPL3   | 0.02128  | 6.30E-01 | 6.85E-01 |
| RFPL4A  | 0.003239 | 9.42E-01 | 9.54E-01 |
| RFPL4B  | 0.089479 | 4.24E-02 | 6.34E-02 |
| RFT1    | 0.137895 | 1.71E-03 | 3.31E-03 |

|         |          |          |          |
|---------|----------|----------|----------|
| RFTN1   | -0.57612 | 7.13E-47 | 4.50E-45 |
| RFTN2   | -0.23166 | 1.05E-07 | 3.59E-07 |
| RFWD2   | 0.032398 | 4.63E-01 | 5.29E-01 |
| RFWD3   | 0.515872 | 2.31E-36 | 8.58E-35 |
| RFX1    | -0.33325 | 8.01E-15 | 5.73E-14 |
| RFX2    | -0.31745 | 1.60E-13 | 1.02E-12 |
| RFX3    | 0.059561 | 1.77E-01 | 2.29E-01 |
| RFX4    | 0.026694 | 5.46E-01 | 6.08E-01 |
| RFX5    | -0.16183 | 2.26E-04 | 5.02E-04 |
| RFX6    | 0.115868 | 8.49E-03 | 1.46E-02 |
| RFX7    | 0.053357 | 2.27E-01 | 2.85E-01 |
| RFX8    | 0.243036 | 2.32E-08 | 8.49E-08 |
| RFXANK  | -0.02538 | 5.66E-01 | 6.26E-01 |
| RFXAP   | -0.19305 | 1.02E-05 | 2.74E-05 |
| RG9MTD1 | 0.379346 | 4.52E-19 | 4.83E-18 |
| RG9MTD2 | 0.181775 | 3.33E-05 | 8.28E-05 |
| RG9MTD3 | -0.32588 | 3.31E-14 | 2.24E-13 |
| RGAG1   | -0.10502 | 1.71E-02 | 2.78E-02 |
| RGAG4   | -0.39303 | 1.80E-20 | 2.19E-19 |
| RGL1    | -0.33361 | 7.47E-15 | 5.37E-14 |
| RGL2    | -0.32036 | 9.36E-14 | 6.08E-13 |
| RGL3    | -0.26832 | 6.09E-10 | 2.67E-09 |
| RGL4    | -0.12197 | 5.58E-03 | 9.93E-03 |
| RGMA    | -0.3288  | 1.90E-14 | 1.31E-13 |
| RGMB    | -0.30694 | 1.07E-12 | 6.26E-12 |
| RGNEF   | -0.28817 | 2.64E-11 | 1.33E-10 |
| RGN     | -0.4036  | 1.35E-21 | 1.79E-20 |
| RGP1    | 0.1723   | 8.49E-05 | 2.00E-04 |
| RGPD1   | -0.00204 | 9.63E-01 | 9.71E-01 |
| RGPD3   | -0.04716 | 2.85E-01 | 3.48E-01 |
| RGPD4   | -0.13801 | 1.69E-03 | 3.28E-03 |
| RGPD5   | -0.07227 | 1.01E-01 | 1.39E-01 |
| RGPD6   | -0.12823 | 3.56E-03 | 6.54E-03 |
| RGPD8   | 0.047489 | 2.82E-01 | 3.44E-01 |
| RGR     | -0.02424 | 5.83E-01 | 6.42E-01 |
| RGS10   | 0.126669 | 3.99E-03 | 7.27E-03 |
| RGS11   | -0.28861 | 2.45E-11 | 1.24E-10 |
| RGS12   | -0.2392  | 3.91E-08 | 1.39E-07 |
| RGS13   | -0.33462 | 6.13E-15 | 4.44E-14 |
| RGS14   | -0.15327 | 4.82E-04 | 1.01E-03 |
| RGS16   | -0.16205 | 2.22E-04 | 4.92E-04 |
| RGS17   | 0.190892 | 1.29E-05 | 3.40E-05 |
| RGS18   | -0.1131  | 1.02E-02 | 1.73E-02 |
| RGS19   | 0.091937 | 3.70E-02 | 5.61E-02 |

|         |          |          |          |
|---------|----------|----------|----------|
| RGS1    | 0.054995 | 2.13E-01 | 2.69E-01 |
| RGS20   | 0.397379 | 6.27E-21 | 7.94E-20 |
| RGS21   | -0.07262 | 9.97E-02 | 1.37E-01 |
| RGS22   | -0.35825 | 4.84E-17 | 4.35E-16 |
| RGS2    | 0.052181 | 2.37E-01 | 2.96E-01 |
| RGS3    | -0.27224 | 3.34E-10 | 1.51E-09 |
| RGS4    | 0.171674 | 9.02E-05 | 2.11E-04 |
| RGS5    | -0.36105 | 2.66E-17 | 2.44E-16 |
| RGS6    | -0.32588 | 3.31E-14 | 2.24E-13 |
| RGS7BP  | -0.28831 | 2.58E-11 | 1.30E-10 |
| RGS7    | -0.02498 | 5.72E-01 | 6.31E-01 |
| RGS8    | -0.00764 | 8.63E-01 | 8.88E-01 |
| RGS9BP  | 0.053604 | 2.25E-01 | 2.82E-01 |
| RGS9    | -0.29767 | 5.36E-12 | 2.91E-11 |
| RGSL1   | 0.042334 | 3.38E-01 | 4.03E-01 |
| RHAG    | 0.059587 | 1.77E-01 | 2.29E-01 |
| RHBDD1  | 0.101942 | 2.07E-02 | 3.30E-02 |
| RHBDD2  | -0.22177 | 3.70E-07 | 1.18E-06 |
| RHBDD3  | -0.00049 | 9.91E-01 | 9.93E-01 |
| RHBDF1  | -0.33105 | 1.23E-14 | 8.65E-14 |
| RHBDF2  | 0.244132 | 2.00E-08 | 7.37E-08 |
| RHBDL1  | -0.26209 | 1.55E-09 | 6.48E-09 |
| RHBDL2  | -0.00043 | 9.92E-01 | 9.94E-01 |
| RHBDL3  | -0.09179 | 3.73E-02 | 5.65E-02 |
| RHBG    | 0.255746 | 3.91E-09 | 1.56E-08 |
| RHCE    | -0.11989 | 6.45E-03 | 1.13E-02 |
| RHCG    | 0.266244 | 8.33E-10 | 3.60E-09 |
| RHD     | -0.19206 | 1.14E-05 | 3.03E-05 |
| RHEBL1  | 0.441409 | 5.71E-26 | 1.09E-24 |
| RHEB    | 0.302944 | 2.16E-12 | 1.23E-11 |
| RHOA    | -0.05615 | 2.03E-01 | 2.59E-01 |
| RHOBTB1 | -0.12678 | 3.95E-03 | 7.22E-03 |
| RHOBTB2 | -0.57475 | 1.31E-46 | 8.17E-45 |
| RHOBTB3 | 0.242325 | 2.56E-08 | 9.31E-08 |
| RHOB    | -0.22076 | 4.19E-07 | 1.33E-06 |
| RHOC    | 0.186321 | 2.09E-05 | 5.35E-05 |
| RHOD    | 0.053018 | 2.30E-01 | 2.88E-01 |
| RHOF    | 0.261577 | 1.67E-09 | 6.96E-09 |
| RHOG    | -0.03562 | 4.20E-01 | 4.86E-01 |
| RHOH    | 0.026241 | 5.52E-01 | 6.14E-01 |
| RHOJ    | -0.28934 | 2.17E-11 | 1.10E-10 |
| RHOQ    | 0.094097 | 3.28E-02 | 5.02E-02 |
| RHOT1   | -0.03396 | 4.42E-01 | 5.08E-01 |
| RHOT2   | -0.22983 | 1.34E-07 | 4.51E-07 |



|         |          |          |          |
|---------|----------|----------|----------|
| RHOU    | -0.2784  | 1.27E-10 | 6.00E-10 |
| RHOV    | 0.303258 | 2.04E-12 | 1.17E-11 |
| RHOXF1  | -0.13785 | 1.71E-03 | 3.32E-03 |
| RHOXF2B | 0.00126  | 9.77E-01 | 9.83E-01 |
| RHO     | 0.061925 | 1.61E-01 | 2.10E-01 |
| RHPN1   | -0.1851  | 2.37E-05 | 6.03E-05 |
| RHPN2   | 0.358483 | 4.61E-17 | 4.15E-16 |
| RIBC1   | -0.30446 | 1.65E-12 | 9.51E-12 |
| RIBC2   | 0.272644 | 3.14E-10 | 1.43E-09 |
| RIC3    | -0.41819 | 3.22E-23 | 4.91E-22 |
| RIC8A   | -0.01463 | 7.41E-01 | 7.84E-01 |
| RIC8B   | 0.174094 | 7.14E-05 | 1.70E-04 |
| RICH2   | -0.46031 | 2.27E-28 | 5.19E-27 |
| RICTOR  | 0.036328 | 4.11E-01 | 4.77E-01 |
| RIF1    | 0.37637  | 8.92E-19 | 9.29E-18 |
| RILPL1  | 0.037168 | 4.00E-01 | 4.66E-01 |
| RILPL2  | -0.3842  | 1.47E-19 | 1.65E-18 |
| RILP    | -0.42126 | 1.43E-23 | 2.27E-22 |
| RIMBP2  | -0.12966 | 3.20E-03 | 5.94E-03 |
| RIMBP3C | -0.07109 | 1.07E-01 | 1.46E-01 |
| RIMBP3  | -0.07881 | 7.39E-02 | 1.05E-01 |
| RIMKLA  | -0.10038 | 2.27E-02 | 3.60E-02 |
| RIMKLB  | -0.03263 | 4.60E-01 | 5.26E-01 |
| RIMS1   | -0.17211 | 8.65E-05 | 2.03E-04 |
| RIMS2   | 0.397346 | 6.32E-21 | 8.00E-20 |
| RIMS3   | -0.21194 | 1.21E-06 | 3.64E-06 |
| RIMS4   | -0.12056 | 6.16E-03 | 1.09E-02 |
| RIN1    | -0.00962 | 8.28E-01 | 8.58E-01 |
| RIN2    | -0.18555 | 2.26E-05 | 5.77E-05 |
| RIN3    | -0.17026 | 1.03E-04 | 2.40E-04 |
| RING1   | -0.12629 | 4.10E-03 | 7.46E-03 |
| RINL    | -0.10796 | 1.42E-02 | 2.35E-02 |
| RINT1   | 0.373718 | 1.63E-18 | 1.66E-17 |
| RIOK1   | 0.390843 | 3.05E-20 | 3.64E-19 |
| RIOK2   | -0.10579 | 1.63E-02 | 2.66E-02 |
| RIOK3   | 0.09781  | 2.64E-02 | 4.13E-02 |
| RIPK1   | -0.11369 | 9.82E-03 | 1.67E-02 |
| RIPK2   | 0.448759 | 6.93E-27 | 1.41E-25 |
| RIPK3   | -0.29026 | 1.87E-11 | 9.56E-11 |
| RIPK4   | -0.11384 | 9.72E-03 | 1.65E-02 |
| RIPPLY1 | -0.12599 | 4.19E-03 | 7.62E-03 |
| RIPPLY2 | 0.324254 | 4.51E-14 | 3.02E-13 |
| RIT1    | -0.05178 | 2.41E-01 | 3.01E-01 |
| RIT2    | 0.084581 | 5.51E-02 | 8.05E-02 |

|          |          |          |          |
|----------|----------|----------|----------|
| RLBP1    | 0.133615 | 2.38E-03 | 4.49E-03 |
| RLF      | 0.159464 | 2.80E-04 | 6.11E-04 |
| RLIM     | 0.078467 | 7.52E-02 | 1.07E-01 |
| RLN1     | 0.184827 | 2.44E-05 | 6.19E-05 |
| RLN2     | 0.13256  | 2.58E-03 | 4.84E-03 |
| RLN3     | -0.11016 | 1.24E-02 | 2.07E-02 |
| RLTPR    | 0.070545 | 1.10E-01 | 1.50E-01 |
| RMI1     | 0.426735 | 3.31E-24 | 5.52E-23 |
| RMND1    | 0.042924 | 3.31E-01 | 3.96E-01 |
| RMND5A   | 0.070024 | 1.12E-01 | 1.53E-01 |
| RMND5B   | -0.22845 | 1.59E-07 | 5.32E-07 |
| RMRP     | -0.01626 | 7.13E-01 | 7.60E-01 |
| RMST     | -0.17994 | 4.00E-05 | 9.86E-05 |
| RNASE10  | 0.184449 | 2.53E-05 | 6.42E-05 |
| RNASE11  | 0.048996 | 2.67E-01 | 3.29E-01 |
| RNASE13  | -0.20051 | 4.52E-06 | 1.27E-05 |
| RNASE1   | -0.57065 | 7.91E-46 | 4.78E-44 |
| RNASE2   | 0.140042 | 1.44E-03 | 2.83E-03 |
| RNASE3   | 0.093322 | 3.42E-02 | 5.22E-02 |
| RNASE4   | -0.36873 | 4.96E-18 | 4.84E-17 |
| RNASE6   | -0.11743 | 7.64E-03 | 1.32E-02 |
| RNASE7   | 0.070616 | 1.09E-01 | 1.49E-01 |
| RNASE8   | -0.10411 | 1.81E-02 | 2.93E-02 |
| RNASE9   | 0.011442 | 7.96E-01 | 8.31E-01 |
| RNASEH1  | 0.640103 | 1.03E-60 | 9.08E-59 |
| RNASEH2A | 0.679353 | 5.74E-71 | 6.13E-69 |
| RNASEH2B | 0.100508 | 2.25E-02 | 3.57E-02 |
| RNASEH2C | 0.041083 | 3.52E-01 | 4.18E-01 |
| RNASEK   | -0.10202 | 2.06E-02 | 3.29E-02 |
| RNASEL   | -0.3293  | 1.72E-14 | 1.19E-13 |
| RNASEN   | 0.264494 | 1.08E-09 | 4.61E-09 |
| RNASET2  | -0.15808 | 3.17E-04 | 6.86E-04 |
| RND1     | -0.13808 | 1.68E-03 | 3.26E-03 |
| RND2     | 0.079721 | 7.07E-02 | 1.01E-01 |
| RND3     | 0.302627 | 2.28E-12 | 1.30E-11 |
| RNF103   | -0.08991 | 4.14E-02 | 6.21E-02 |
| RNF10    | -0.03646 | 4.09E-01 | 4.75E-01 |
| RNF111   | -0.03422 | 4.38E-01 | 5.05E-01 |
| RNF112   | -0.10776 | 1.44E-02 | 2.38E-02 |
| RNF113A  | 0.013677 | 7.57E-01 | 7.98E-01 |
| RNF113B  | 0.026249 | 5.52E-01 | 6.14E-01 |
| RNF114   | 0.128842 | 3.40E-03 | 6.27E-03 |
| RNF115   | 0.216534 | 7.01E-07 | 2.17E-06 |
| RNF11    | -0.0182  | 6.80E-01 | 7.31E-01 |

|          |          |          |          |
|----------|----------|----------|----------|
| RNF121   | 0.250928 | 7.78E-09 | 3.00E-08 |
| RNF122   | -0.10542 | 1.67E-02 | 2.72E-02 |
| RNF123   | -0.19743 | 6.36E-06 | 1.75E-05 |
| RNF125   | -0.29726 | 5.75E-12 | 3.12E-11 |
| RNF126P1 | -0.01978 | 6.54E-01 | 7.08E-01 |
| RNF126   | 0.201511 | 4.04E-06 | 1.14E-05 |
| RNF128   | -0.0903  | 4.05E-02 | 6.09E-02 |
| RNF130   | -0.24022 | 3.41E-08 | 1.22E-07 |
| RNF133   | -0.16092 | 2.45E-04 | 5.41E-04 |
| RNF135   | -0.18702 | 1.94E-05 | 5.00E-05 |
| RNF138P1 | 0.128746 | 3.42E-03 | 6.32E-03 |
| RNF138   | 0.230274 | 1.26E-07 | 4.27E-07 |
| RNF139   | 0.02231  | 6.13E-01 | 6.70E-01 |
| RNF13    | -0.05514 | 2.12E-01 | 2.68E-01 |
| RNF141   | -0.17744 | 5.14E-05 | 1.25E-04 |
| RNF144A  | 0.128212 | 3.56E-03 | 6.55E-03 |
| RNF144B  | -0.30668 | 1.12E-12 | 6.53E-12 |
| RNF145   | -0.38547 | 1.09E-19 | 1.23E-18 |
| RNF146   | -0.34934 | 3.15E-16 | 2.60E-15 |
| RNF148   | -0.11608 | 8.37E-03 | 1.44E-02 |
| RNF149   | 0.200718 | 4.42E-06 | 1.24E-05 |
| RNF14    | 0.005947 | 8.93E-01 | 9.13E-01 |
| RNF150   | -0.15991 | 2.69E-04 | 5.89E-04 |
| RNF151   | -0.01284 | 7.71E-01 | 8.10E-01 |
| RNF152   | -0.1005  | 2.26E-02 | 3.57E-02 |
| RNF157   | 0.260973 | 1.83E-09 | 7.58E-09 |
| RNF160   | 0.074597 | 9.08E-02 | 1.26E-01 |
| RNF165   | -0.12215 | 5.51E-03 | 9.82E-03 |
| RNF166   | -0.13485 | 2.16E-03 | 4.12E-03 |
| RNF167   | -0.20842 | 1.84E-06 | 5.39E-06 |
| RNF168   | 0.200322 | 4.62E-06 | 1.29E-05 |
| RNF169   | -0.08245 | 6.15E-02 | 8.91E-02 |
| RNF170   | -0.10921 | 1.31E-02 | 2.18E-02 |
| RNF175   | -0.30454 | 1.63E-12 | 9.40E-12 |
| RNF17    | 0.012333 | 7.80E-01 | 8.18E-01 |
| RNF180   | -0.39549 | 9.94E-21 | 1.24E-19 |
| RNF181   | 0.091379 | 3.82E-02 | 5.77E-02 |
| RNF182   | -0.04943 | 2.63E-01 | 3.24E-01 |
| RNF183   | 0.099206 | 2.44E-02 | 3.83E-02 |
| RNF185   | -0.16448 | 1.77E-04 | 3.99E-04 |
| RNF186   | 0.147902 | 7.60E-04 | 1.56E-03 |
| RNF187   | -0.09538 | 3.04E-02 | 4.69E-02 |
| RNF19A   | -0.07505 | 8.89E-02 | 1.24E-01 |
| RNF19B   | -0.19801 | 5.97E-06 | 1.65E-05 |

|         |          |          |          |
|---------|----------|----------|----------|
| RNF207  | -0.14053 | 1.39E-03 | 2.73E-03 |
| RNF208  | -0.17644 | 5.68E-05 | 1.37E-04 |
| RNF20   | -0.10769 | 1.45E-02 | 2.39E-02 |
| RNF212  | 0.020014 | 6.50E-01 | 7.04E-01 |
| RNF213  | 0.142433 | 1.19E-03 | 2.36E-03 |
| RNF214  | 0.100052 | 2.32E-02 | 3.66E-02 |
| RNF215  | -0.10305 | 1.93E-02 | 3.11E-02 |
| RNF216L | 0.212684 | 1.11E-06 | 3.35E-06 |
| RNF216  | 0.139877 | 1.46E-03 | 2.86E-03 |
| RNF217  | 0.10303  | 1.94E-02 | 3.11E-02 |
| RNF219  | 0.216676 | 6.89E-07 | 2.13E-06 |
| RNF220  | -0.04334 | 3.26E-01 | 3.92E-01 |
| RNF222  | 0.092672 | 3.55E-02 | 5.40E-02 |
| RNF24   | 0.129871 | 3.15E-03 | 5.85E-03 |
| RNF25   | 0.090145 | 4.09E-02 | 6.14E-02 |
| RNF26   | 0.278138 | 1.33E-10 | 6.25E-10 |
| RNF2    | 0.253026 | 5.77E-09 | 2.27E-08 |
| RNF31   | 0.042143 | 3.40E-01 | 4.05E-01 |
| RNF32   | 0.003272 | 9.41E-01 | 9.54E-01 |
| RNF34   | 0.513962 | 4.61E-36 | 1.68E-34 |
| RNF38   | -0.21301 | 1.07E-06 | 3.23E-06 |
| RNF39   | -0.26839 | 6.02E-10 | 2.64E-09 |
| RNF40   | -0.04796 | 2.77E-01 | 3.39E-01 |
| RNF41   | 0.146497 | 8.55E-04 | 1.73E-03 |
| RNF43   | -0.08646 | 4.99E-02 | 7.36E-02 |
| RNF44   | -0.16265 | 2.10E-04 | 4.67E-04 |
| RNF4    | 0.280165 | 9.64E-11 | 4.58E-10 |
| RNF5P1  | -0.06595 | 1.35E-01 | 1.80E-01 |
| RNF5    | -0.13856 | 1.62E-03 | 3.15E-03 |
| RNF6    | -0.02418 | 5.84E-01 | 6.43E-01 |
| RNF7    | 0.352366 | 1.68E-16 | 1.42E-15 |
| RNF8    | 0.084098 | 5.65E-02 | 8.24E-02 |
| RNFT1   | 0.096318 | 2.88E-02 | 4.47E-02 |
| RNFT2   | 0.341601 | 1.53E-15 | 1.17E-14 |
| RNGTT   | 0.335992 | 4.68E-15 | 3.44E-14 |
| RNH1    | -0.3686  | 5.11E-18 | 4.97E-17 |
| RNLS    | -0.10687 | 1.53E-02 | 2.50E-02 |
| RNMTL1  | 0.040427 | 3.60E-01 | 4.26E-01 |
| RNMT    | 0.063024 | 1.53E-01 | 2.01E-01 |
| RNPC3   | -0.34242 | 1.30E-15 | 1.00E-14 |
| RNPEPL1 | -0.21367 | 9.89E-07 | 2.99E-06 |
| RNPEP   | -0.21866 | 5.42E-07 | 1.70E-06 |
| RNPS1   | 0.114111 | 9.55E-03 | 1.63E-02 |
| RNU11   | 0.027884 | 5.28E-01 | 5.91E-01 |

|             |          |          |          |
|-------------|----------|----------|----------|
| RNU4ATAC    | 0.047323 | 2.84E-01 | 3.46E-01 |
| RNU6ATAC    | 0.068204 | 1.22E-01 | 1.65E-01 |
| ROBLD3      | -0.04798 | 2.77E-01 | 3.39E-01 |
| ROBO1       | 0.118961 | 6.88E-03 | 1.20E-02 |
| ROBO2       | -0.55614 | 3.79E-43 | 2.03E-41 |
| ROBO3       | -0.12633 | 4.09E-03 | 7.44E-03 |
| ROBO4       | -0.3374  | 3.54E-15 | 2.62E-14 |
| ROCK1       | 0.017243 | 6.96E-01 | 7.45E-01 |
| ROCK2       | 0.114532 | 9.28E-03 | 1.58E-02 |
| ROD1        | 0.279593 | 1.06E-10 | 5.00E-10 |
| ROGDI       | -0.46706 | 2.89E-29 | 7.06E-28 |
| ROM1        | -0.29768 | 5.35E-12 | 2.91E-11 |
| ROMO1       | 0.185237 | 2.34E-05 | 5.95E-05 |
| ROPN1B      | -0.13735 | 1.78E-03 | 3.44E-03 |
| ROPN1L      | -0.15338 | 4.78E-04 | 1.01E-03 |
| ROPN1       | -0.05606 | 2.04E-01 | 2.60E-01 |
| ROR1        | -0.10098 | 2.19E-02 | 3.48E-02 |
| ROR2        | 0.057102 | 1.96E-01 | 2.50E-01 |
| RORA        | -0.38196 | 2.47E-19 | 2.73E-18 |
| RORB        | -0.3229  | 5.81E-14 | 3.86E-13 |
| RORC        | -0.37295 | 1.93E-18 | 1.96E-17 |
| ROS1        | -0.3939  | 1.46E-20 | 1.79E-19 |
| RP1-177G6.2 | -0.38087 | 3.18E-19 | 3.46E-18 |
| RP1L1       | 0.098435 | 2.55E-02 | 3.99E-02 |
| RP1         | -0.23203 | 1.01E-07 | 3.43E-07 |
| RP2         | 0.147965 | 7.56E-04 | 1.55E-03 |
| RP9P        | 0.257778 | 2.91E-09 | 1.18E-08 |
| RP9         | 0.123324 | 5.07E-03 | 9.10E-03 |
| RPA1        | 0.201272 | 4.15E-06 | 1.17E-05 |
| RPA2        | 0.041181 | 3.51E-01 | 4.17E-01 |
| RPA3        | 0.473634 | 3.72E-30 | 9.66E-29 |
| RPA4        | -0.01376 | 7.55E-01 | 7.96E-01 |
| RPAIN       | -0.22349 | 2.99E-07 | 9.67E-07 |
| RPAP1       | 0.00116  | 9.79E-01 | 9.84E-01 |
| RPAP2       | 0.425608 | 4.49E-24 | 7.39E-23 |
| RPAP3       | 0.439708 | 9.24E-26 | 1.74E-24 |
| RPE65       | 0.024725 | 5.76E-01 | 6.35E-01 |
| RPE         | 0.521828 | 2.61E-37 | 1.01E-35 |
| RPF1        | 0.280199 | 9.58E-11 | 4.56E-10 |
| RPF2        | 0.473135 | 4.35E-30 | 1.12E-28 |
| RPGRIP1L    | 0.046881 | 2.88E-01 | 3.51E-01 |
| RPGRIP1     | -0.11561 | 8.64E-03 | 1.48E-02 |
| RPGR        | -0.24889 | 1.04E-08 | 3.94E-08 |
| RPH3AL      | -0.27065 | 4.27E-10 | 1.91E-09 |

|           |          |          |          |
|-----------|----------|----------|----------|
| RPH3A     | -0.09715 | 2.75E-02 | 4.27E-02 |
| RPIA      | 0.229941 | 1.32E-07 | 4.45E-07 |
| RPL10A    | -0.16067 | 2.51E-04 | 5.53E-04 |
| RPL10L    | 0.149718 | 6.53E-04 | 1.35E-03 |
| RPL10     | -0.10884 | 1.35E-02 | 2.23E-02 |
| RPL11     | -0.2258  | 2.23E-07 | 7.34E-07 |
| RPL12     | -0.06003 | 1.74E-01 | 2.26E-01 |
| RPL13AP17 | -0.40864 | 3.79E-22 | 5.28E-21 |
| RPL13AP20 | -0.09884 | 2.49E-02 | 3.91E-02 |
| RPL13AP3  | -0.09492 | 3.13E-02 | 4.81E-02 |
| RPL13AP6  | -0.00289 | 9.48E-01 | 9.59E-01 |
| RPL13A    | -0.13629 | 1.94E-03 | 3.72E-03 |
| RPL13P5   | -0.03822 | 3.87E-01 | 4.53E-01 |
| RPL13     | -0.16449 | 1.77E-04 | 3.99E-04 |
| RPL14     | -0.06717 | 1.28E-01 | 1.72E-01 |
| RPL15     | -0.18302 | 2.93E-05 | 7.35E-05 |
| RPL17     | -0.02677 | 5.44E-01 | 6.07E-01 |
| RPL18A    | 0.032377 | 4.63E-01 | 5.29E-01 |
| RPL18     | -0.01099 | 8.04E-01 | 8.38E-01 |
| RPL19P12  | 0.032331 | 4.64E-01 | 5.30E-01 |
| RPL19     | 0.038323 | 3.85E-01 | 4.52E-01 |
| RPL21P44  | -0.2315  | 1.08E-07 | 3.67E-07 |
| RPL21     | -0.01084 | 8.06E-01 | 8.40E-01 |
| RPL22L1   | 0.222545 | 3.36E-07 | 1.08E-06 |
| RPL22     | -0.14535 | 9.40E-04 | 1.90E-03 |
| RPL23AP32 | -0.21239 | 1.15E-06 | 3.46E-06 |
| RPL23AP53 | -0.2207  | 4.22E-07 | 1.34E-06 |
| RPL23AP64 | -0.2136  | 9.97E-07 | 3.02E-06 |
| RPL23AP7  | 0.187109 | 1.92E-05 | 4.96E-05 |
| RPL23AP82 | 0.047487 | 2.82E-01 | 3.44E-01 |
| RPL23A    | 0.062442 | 1.57E-01 | 2.06E-01 |
| RPL23P8   | -0.11704 | 7.84E-03 | 1.36E-02 |
| RPL23     | -0.02972 | 5.01E-01 | 5.65E-01 |
| RPL24     | 0.024027 | 5.86E-01 | 6.45E-01 |
| RPL26L1   | 0.190091 | 1.41E-05 | 3.68E-05 |
| RPL26     | -0.07719 | 8.01E-02 | 1.13E-01 |
| RPL27A    | -0.0489  | 2.68E-01 | 3.30E-01 |
| RPL27     | 0.179837 | 4.05E-05 | 9.96E-05 |
| RPL28     | -0.03263 | 4.60E-01 | 5.26E-01 |
| RPL29P2   | -0.00974 | 8.25E-01 | 8.56E-01 |
| RPL29     | -0.05717 | 1.95E-01 | 2.50E-01 |
| RPL30     | 0.01214  | 7.83E-01 | 8.20E-01 |
| RPL31P11  | 0.023268 | 5.98E-01 | 6.56E-01 |
| RPL31     | -0.00153 | 9.72E-01 | 9.79E-01 |

|         |          |          |          |
|---------|----------|----------|----------|
| RPL32P3 | -0.15482 | 4.22E-04 | 8.95E-04 |
| RPL32   | -0.02441 | 5.81E-01 | 6.40E-01 |
| RPL34   | -0.1748  | 6.67E-05 | 1.59E-04 |
| RPL35A  | 0.16091  | 2.46E-04 | 5.41E-04 |
| RPL35   | 0.096771 | 2.81E-02 | 4.36E-02 |
| RPL36AL | -0.00949 | 8.30E-01 | 8.60E-01 |
| RPL36A  | 0.179569 | 4.16E-05 | 1.02E-04 |
| RPL36   | 0.019808 | 6.54E-01 | 7.07E-01 |
| RPL37A  | -0.03323 | 4.52E-01 | 5.18E-01 |
| RPL37   | 0.040547 | 3.58E-01 | 4.25E-01 |
| RPL38   | 0.171064 | 9.56E-05 | 2.24E-04 |
| RPL39L  | 0.469649 | 1.30E-29 | 3.26E-28 |
| RPL39   | 0.074336 | 9.20E-02 | 1.28E-01 |
| RPL3L   | 0.13333  | 2.43E-03 | 4.59E-03 |
| RPL3    | -0.19804 | 5.95E-06 | 1.64E-05 |
| RPL41   | 0.047151 | 2.86E-01 | 3.48E-01 |
| RPL4    | -0.01343 | 7.61E-01 | 8.01E-01 |
| RPL5    | -0.00314 | 9.43E-01 | 9.56E-01 |
| RPL6    | 0.044253 | 3.16E-01 | 3.81E-01 |
| RPL7A   | -0.04958 | 2.61E-01 | 3.23E-01 |
| RPL7L1  | 0.305022 | 1.50E-12 | 8.67E-12 |
| RPL7    | -0.03415 | 4.39E-01 | 5.06E-01 |
| RPL8    | 0.045662 | 3.01E-01 | 3.65E-01 |
| RPL9    | 0.003934 | 9.29E-01 | 9.43E-01 |
| RPLP0P2 | 0.258929 | 2.46E-09 | 1.01E-08 |
| RPLP0   | 0.243735 | 2.11E-08 | 7.75E-08 |
| RPLP1   | -0.08669 | 4.93E-02 | 7.28E-02 |
| RPLP2   | -0.07303 | 9.78E-02 | 1.35E-01 |
| RPN1    | 0.341559 | 1.54E-15 | 1.18E-14 |
| RPN2    | 0.207212 | 2.11E-06 | 6.14E-06 |
| RPP14   | 0.078707 | 7.43E-02 | 1.06E-01 |
| RPP21   | 0.10508  | 1.71E-02 | 2.77E-02 |
| RPP25   | 0.35595  | 7.91E-17 | 6.91E-16 |
| RPP30   | 0.375681 | 1.04E-18 | 1.08E-17 |
| RPP38   | 0.107956 | 1.42E-02 | 2.35E-02 |
| RPP40   | 0.39764  | 5.89E-21 | 7.47E-20 |
| RPPH1   | -0.00433 | 9.22E-01 | 9.38E-01 |
| RPRD1A  | 0.13496  | 2.15E-03 | 4.08E-03 |
| RPRD1B  | 0.258547 | 2.61E-09 | 1.06E-08 |
| RPRD2   | -0.2492  | 9.91E-09 | 3.78E-08 |
| RPRML   | -0.09687 | 2.79E-02 | 4.34E-02 |
| RPRM    | 0.019427 | 6.60E-01 | 7.13E-01 |
| RPS10P7 | -0.2751  | 2.14E-10 | 9.90E-10 |
| RPS10   | 0.092975 | 3.49E-02 | 5.32E-02 |

|           |          |          |          |
|-----------|----------|----------|----------|
| RPS11     | -0.02484 | 5.74E-01 | 6.33E-01 |
| RPS12     | -0.01068 | 8.09E-01 | 8.42E-01 |
| RPS13     | -0.09133 | 3.83E-02 | 5.78E-02 |
| RPS14     | -0.08026 | 6.88E-02 | 9.87E-02 |
| RPS15AP10 | -0.22351 | 2.98E-07 | 9.65E-07 |
| RPS15A    | -0.01462 | 7.41E-01 | 7.84E-01 |
| RPS15     | 0.049101 | 2.66E-01 | 3.28E-01 |
| RPS16     | 0.059995 | 1.74E-01 | 2.26E-01 |
| RPS17     | 0.036447 | 4.09E-01 | 4.76E-01 |
| RPS18     | 0.037478 | 3.96E-01 | 4.63E-01 |
| RPS19BP1  | -0.00793 | 8.57E-01 | 8.84E-01 |
| RPS19     | 0.1362   | 1.95E-03 | 3.74E-03 |
| RPS20     | -0.07487 | 8.96E-02 | 1.25E-01 |
| RPS21     | 0.073641 | 9.50E-02 | 1.32E-01 |
| RPS23     | -0.12619 | 4.13E-03 | 7.51E-03 |
| RPS24     | -0.05826 | 1.87E-01 | 2.40E-01 |
| RPS25     | -0.08459 | 5.51E-02 | 8.05E-02 |
| RPS26P11  | 0.04778  | 2.79E-01 | 3.41E-01 |
| RPS26     | 0.153909 | 4.56E-04 | 9.64E-04 |
| RPS27A    | 0.170345 | 1.02E-04 | 2.39E-04 |
| RPS27L    | -0.21158 | 1.27E-06 | 3.79E-06 |
| RPS27     | -0.0499  | 2.58E-01 | 3.19E-01 |
| RPS28     | -0.06758 | 1.26E-01 | 1.69E-01 |
| RPS29     | 0.067067 | 1.29E-01 | 1.72E-01 |
| RPS2P32   | 0.284388 | 4.89E-11 | 2.39E-10 |
| RPS2      | 0.026624 | 5.47E-01 | 6.09E-01 |
| RPS3A     | -0.00701 | 8.74E-01 | 8.98E-01 |
| RPS3      | 0.074161 | 9.27E-02 | 1.29E-01 |
| RPS4X     | -0.13542 | 2.07E-03 | 3.96E-03 |
| RPS4Y1    | 0.024666 | 5.77E-01 | 6.36E-01 |
| RPS4Y2    | -0.04662 | 2.91E-01 | 3.54E-01 |
| RPS5      | 0.067917 | 1.24E-01 | 1.67E-01 |
| RPS6KA1   | -0.36865 | 5.05E-18 | 4.92E-17 |
| RPS6KA2   | -0.53805 | 5.49E-40 | 2.55E-38 |
| RPS6KA3   | -0.24605 | 1.54E-08 | 5.73E-08 |
| RPS6KA4   | 0.094697 | 3.17E-02 | 4.86E-02 |
| RPS6KA5   | -0.18873 | 1.62E-05 | 4.23E-05 |
| RPS6KA6   | 0.039786 | 3.68E-01 | 4.34E-01 |
| RPS6KB1   | 0.326626 | 2.87E-14 | 1.96E-13 |
| RPS6KB2   | 0.208008 | 1.92E-06 | 5.63E-06 |
| RPS6KC1   | 0.173404 | 7.63E-05 | 1.81E-04 |
| RPS6KL1   | -0.11067 | 1.20E-02 | 2.00E-02 |
| RPS6      | -0.04661 | 2.91E-01 | 3.54E-01 |
| RPS7      | 0.230226 | 1.27E-07 | 4.29E-07 |



|         |          |           |           |
|---------|----------|-----------|-----------|
| RPS8    | -0.01917 | 6.64E-01  | 7.16E-01  |
| RPS9    | -0.14017 | 1.43E-03  | 2.80E-03  |
| RPSAP52 | 0.188975 | 1.58E-05  | 4.13E-05  |
| RPSAP58 | 0.075432 | 8.72E-02  | 1.22E-01  |
| RPSAP9  | 0.046945 | 2.88E-01  | 3.50E-01  |
| RPSA    | 0.081053 | 6.61E-02  | 9.51E-02  |
| RPTN    | 0.029252 | 5.08E-01  | 5.72E-01  |
| RPTOR   | 0.121925 | 5.60E-03  | 9.96E-03  |
| RPUSD1  | 0.074399 | 9.17E-02  | 1.27E-01  |
| RPUSD2  | 0.036791 | 4.05E-01  | 4.71E-01  |
| RPUSD3  | 0.04863  | 2.71E-01  | 3.33E-01  |
| RPUSD4  | 0.123503 | 5.01E-03  | 8.99E-03  |
| RQCD1   | 0.54966  | 5.41E-42  | 2.73E-40  |
| RRAD    | -0.29168 | 1.47E-11  | 7.63E-11  |
| RRAGA   | -0.01614 | 7.15E-01  | 7.62E-01  |
| RRAGB   | -0.15956 | 2.77E-04  | 6.06E-04  |
| RRAGC   | 0.16943  | 1.12E-04  | 2.59E-04  |
| RRAGD   | 0.13995  | 1.45E-03  | 2.85E-03  |
| RRAS2   | -0.05573 | 2.07E-01  | 2.62E-01  |
| RRAS    | -0.1477  | 7.73E-04  | 1.58E-03  |
| RRBP1   | -0.25846 | 2.64E-09  | 1.07E-08  |
| RREB1   | -0.09894 | 2.47E-02  | 3.89E-02  |
| RRH     | -0.1856  | 2.25E-05  | 5.75E-05  |
| RRM1    | 0.587888 | 3.45E-49  | 2.30E-47  |
| RRM2B   | -0.37381 | 1.59E-18  | 1.63E-17  |
| RRM2    | 1        | 1.00E-196 | 1.00E-192 |
| RRN3P1  | -0.22573 | 2.25E-07  | 7.41E-07  |
| RRN3P2  | -0.13301 | 2.49E-03  | 4.69E-03  |
| RRN3P3  | -0.20853 | 1.81E-06  | 5.32E-06  |
| RRN3    | -0.02345 | 5.95E-01  | 6.53E-01  |
| RRP12   | 0.139231 | 1.54E-03  | 3.00E-03  |
| RRP15   | 0.111302 | 1.15E-02  | 1.93E-02  |
| RRP1B   | 0.310938 | 5.24E-13  | 3.17E-12  |
| RRP1    | 0.25864  | 2.57E-09  | 1.05E-08  |
| RRP7A   | 0.206417 | 2.31E-06  | 6.70E-06  |
| RRP7B   | 0.000393 | 9.93E-01  | 9.94E-01  |
| RRP8    | -0.12543 | 4.36E-03  | 7.91E-03  |
| RRP9    | 0.265312 | 9.58E-10  | 4.11E-09  |
| RRS1    | 0.188824 | 1.61E-05  | 4.19E-05  |
| RS1     | -0.46722 | 2.76E-29  | 6.73E-28  |
| RSAD1   | -0.26887 | 5.60E-10  | 2.47E-09  |
| RSAD2   | 0.108978 | 1.33E-02  | 2.22E-02  |
| RSBN1L  | -0.05152 | 2.43E-01  | 3.03E-01  |
| RSBN1   | -0.18583 | 2.20E-05  | 5.62E-05  |

|          |          |          |          |
|----------|----------|----------|----------|
| RSC1A1   | 0.029616 | 5.02E-01 | 5.67E-01 |
| RSF1     | 0.101007 | 2.19E-02 | 3.48E-02 |
| RSL1D1   | 0.004666 | 9.16E-01 | 9.33E-01 |
| RSL24D1  | 0.143643 | 1.08E-03 | 2.16E-03 |
| RSPH10B2 | -0.25991 | 2.13E-09 | 8.78E-09 |
| RSPH1    | -0.3125  | 3.96E-13 | 2.42E-12 |
| RSPH3    | -0.01379 | 7.55E-01 | 7.96E-01 |
| RSPH4A   | -0.26012 | 2.07E-09 | 8.53E-09 |
| RSPH6A   | 0.133688 | 2.36E-03 | 4.47E-03 |
| RSPH9    | -0.15405 | 4.51E-04 | 9.52E-04 |
| RSPO1    | -0.42575 | 4.31E-24 | 7.12E-23 |
| RSPO2    | -0.50708 | 5.34E-35 | 1.83E-33 |
| RSPO3    | 0.253926 | 5.08E-09 | 2.00E-08 |
| RSPO4    | -0.24892 | 1.03E-08 | 3.92E-08 |
| RSPRY1   | 0.089632 | 4.20E-02 | 6.30E-02 |
| RSRC1    | 0.546655 | 1.82E-41 | 8.94E-40 |
| RSRC2    | 0.045434 | 3.03E-01 | 3.67E-01 |
| RSU1     | -0.15582 | 3.86E-04 | 8.25E-04 |
| RTBDN    | 0.206514 | 2.29E-06 | 6.63E-06 |
| RTCD1    | 0.407563 | 4.98E-22 | 6.87E-21 |
| RTDR1    | -0.10393 | 1.83E-02 | 2.96E-02 |
| RTTEL1   | -0.0549  | 2.14E-01 | 2.70E-01 |
| RTF1     | -0.02212 | 6.17E-01 | 6.73E-01 |
| RTKN2    | 0.091873 | 3.71E-02 | 5.62E-02 |
| RTKN     | 0.28544  | 4.12E-11 | 2.03E-10 |
| RTL1     | 0.175736 | 6.08E-05 | 1.46E-04 |
| RTN1     | -0.21533 | 8.11E-07 | 2.49E-06 |
| RTN2     | 0.015275 | 7.29E-01 | 7.74E-01 |
| RTN3     | 0.191699 | 1.18E-05 | 3.14E-05 |
| RTN4IP1  | 0.262757 | 1.40E-09 | 5.90E-09 |
| RTN4RL1  | -0.43205 | 7.79E-25 | 1.35E-23 |
| RTN4RL2  | -0.07362 | 9.51E-02 | 1.32E-01 |
| RTN4R    | -0.03483 | 4.30E-01 | 4.97E-01 |
| RTN4     | 0.286828 | 3.28E-11 | 1.63E-10 |
| RTP1     | -0.02639 | 5.50E-01 | 6.12E-01 |
| RTP2     | -0.02667 | 5.46E-01 | 6.08E-01 |
| RTP3     | 0.092234 | 3.64E-02 | 5.52E-02 |
| RTP4     | 0.103191 | 1.92E-02 | 3.08E-02 |
| RTTN     | 0.315541 | 2.28E-13 | 1.42E-12 |
| RUFY1    | -0.31663 | 1.87E-13 | 1.18E-12 |
| RUFY2    | -0.09198 | 3.69E-02 | 5.59E-02 |
| RUFY3    | -0.35414 | 1.16E-16 | 9.97E-16 |
| RUFY4    | 0.012815 | 7.72E-01 | 8.10E-01 |
| RUNDC1   | -0.03778 | 3.92E-01 | 4.59E-01 |

|         |          |          |          |
|---------|----------|----------|----------|
| RUNDC2A | -0.10563 | 1.65E-02 | 2.69E-02 |
| RUNDC2C | -0.26767 | 6.71E-10 | 2.93E-09 |
| RUNDC3A | 0.274708 | 2.28E-10 | 1.05E-09 |
| RUNDC3B | -0.03114 | 4.81E-01 | 5.46E-01 |
| RUNX1T1 | -0.20872 | 1.77E-06 | 5.21E-06 |
| RUNX1   | -0.27385 | 2.60E-10 | 1.19E-09 |
| RUNX2   | 0.076528 | 8.27E-02 | 1.16E-01 |
| RUNX3   | -0.05015 | 2.56E-01 | 3.17E-01 |
| RUSC1   | 0.153671 | 4.66E-04 | 9.82E-04 |
| RUSC2   | 0.00989  | 8.23E-01 | 8.54E-01 |
| RUVBL1  | 0.446106 | 1.49E-26 | 2.97E-25 |
| RUVBL2  | 0.353834 | 1.24E-16 | 1.06E-15 |
| RWDD1   | 0.132559 | 2.58E-03 | 4.84E-03 |
| RWDD2A  | 0.078285 | 7.59E-02 | 1.08E-01 |
| RWDD2B  | -0.1133  | 1.01E-02 | 1.71E-02 |
| RWDD3   | 0.095115 | 3.09E-02 | 4.76E-02 |
| RWDD4A  | 0.09891  | 2.48E-02 | 3.89E-02 |
| RXFP1   | -0.22033 | 4.41E-07 | 1.40E-06 |
| RXFP2   | -0.21632 | 7.20E-07 | 2.22E-06 |
| RXFP3   | 0.107758 | 1.44E-02 | 2.38E-02 |
| RXFP4   | -0.15781 | 3.24E-04 | 7.01E-04 |
| RXRA    | -0.39662 | 7.55E-21 | 9.48E-20 |
| RXRB    | -0.24851 | 1.09E-08 | 4.14E-08 |
| RXRG    | -0.37978 | 4.08E-19 | 4.38E-18 |
| RYBP    | -0.046   | 2.97E-01 | 3.61E-01 |
| RYK     | 0.113805 | 9.74E-03 | 1.66E-02 |
| RYR1    | -0.08056 | 6.77E-02 | 9.73E-02 |
| RYR2    | -0.33607 | 4.61E-15 | 3.39E-14 |
| RYR3    | -0.23902 | 4.00E-08 | 1.42E-07 |
| S100A10 | 0.108205 | 1.40E-02 | 2.32E-02 |
| S100A11 | 0.105737 | 1.64E-02 | 2.67E-02 |
| S100A12 | 0.159615 | 2.76E-04 | 6.04E-04 |
| S100A13 | -0.06416 | 1.46E-01 | 1.93E-01 |
| S100A14 | -0.12292 | 5.22E-03 | 9.33E-03 |
| S100A16 | 0.099645 | 2.37E-02 | 3.74E-02 |
| S100A1  | -0.19439 | 8.86E-06 | 2.39E-05 |
| S100A2  | 0.147039 | 8.17E-04 | 1.66E-03 |
| S100A3  | 0.105374 | 1.67E-02 | 2.73E-02 |
| S100A4  | -0.12139 | 5.81E-03 | 1.03E-02 |
| S100A5  | 0.125187 | 4.44E-03 | 8.04E-03 |
| S100A6  | -0.05387 | 2.22E-01 | 2.80E-01 |
| S100A7A | 0.144073 | 1.04E-03 | 2.09E-03 |
| S100A7  | 0.215998 | 7.48E-07 | 2.30E-06 |
| S100A8  | 0.236146 | 5.87E-08 | 2.05E-07 |

|         |          |          |          |
|---------|----------|----------|----------|
| S100A9  | 0.172201 | 8.57E-05 | 2.02E-04 |
| S100B   | -0.26341 | 1.27E-09 | 5.38E-09 |
| S100G   | -0.12011 | 6.35E-03 | 1.12E-02 |
| S100PBP | -0.02508 | 5.70E-01 | 6.30E-01 |
| S100P   | 0.047442 | 2.83E-01 | 3.45E-01 |
| S100Z   | -0.21703 | 6.60E-07 | 2.05E-06 |
| S1PR1   | -0.29102 | 1.65E-11 | 8.47E-11 |
| S1PR2   | -0.17404 | 7.18E-05 | 1.71E-04 |
| S1PR3   | 0.012644 | 7.75E-01 | 8.13E-01 |
| S1PR4   | -0.34096 | 1.74E-15 | 1.32E-14 |
| S1PR5   | 0.146662 | 8.43E-04 | 1.71E-03 |
| SAA1    | 0.212238 | 1.17E-06 | 3.52E-06 |
| SAA2    | 0.217127 | 6.53E-07 | 2.03E-06 |
| SAA3P   | -0.02067 | 6.40E-01 | 6.94E-01 |
| SAA4    | 0.162598 | 2.11E-04 | 4.70E-04 |
| SAAL1   | 0.467958 | 2.19E-29 | 5.43E-28 |
| SAC3D1  | 0.287544 | 2.92E-11 | 1.46E-10 |
| SACM1L  | -0.35812 | 4.99E-17 | 4.47E-16 |
| SACS    | 0.246301 | 1.48E-08 | 5.54E-08 |
| SAE1    | 0.449743 | 5.21E-27 | 1.07E-25 |
| SAFB2   | -0.15722 | 3.42E-04 | 7.36E-04 |
| SAFB    | -0.00393 | 9.29E-01 | 9.43E-01 |
| SAGE1   | 0.180336 | 3.85E-05 | 9.51E-05 |
| SAG     | 0.052109 | 2.38E-01 | 2.97E-01 |
| SALL1   | 0.069612 | 1.15E-01 | 1.56E-01 |
| SALL2   | -0.21621 | 7.29E-07 | 2.25E-06 |
| SALL3   | 0.09367  | 3.36E-02 | 5.13E-02 |
| SALL4   | 0.063307 | 1.51E-01 | 1.99E-01 |
| SAMD10  | -0.12075 | 6.07E-03 | 1.07E-02 |
| SAMD11  | -0.2772  | 1.54E-10 | 7.20E-10 |
| SAMD12  | -0.29064 | 1.75E-11 | 9.00E-11 |
| SAMD13  | -0.02923 | 5.08E-01 | 5.72E-01 |
| SAMD14  | -0.08456 | 5.51E-02 | 8.06E-02 |
| SAMD1   | 0.182479 | 3.10E-05 | 7.75E-05 |
| SAMD3   | -0.08512 | 5.36E-02 | 7.85E-02 |
| SAMD4A  | -0.03811 | 3.88E-01 | 4.55E-01 |
| SAMD4B  | 0.17549  | 6.23E-05 | 1.50E-04 |
| SAMD5   | -0.15052 | 6.10E-04 | 1.27E-03 |
| SAMD7   | 0.048331 | 2.74E-01 | 3.36E-01 |
| SAMD8   | 0.358119 | 4.99E-17 | 4.47E-16 |
| SAMD9L  | 0.131585 | 2.77E-03 | 5.19E-03 |
| SAMD9   | 0.208292 | 1.86E-06 | 5.46E-06 |
| SAMHD1  | 0.050511 | 2.53E-01 | 3.13E-01 |
| SAMM50  | 0.121695 | 5.69E-03 | 1.01E-02 |

|         |          |          |          |
|---------|----------|----------|----------|
| SAMSN1  | 0.053122 | 2.29E-01 | 2.87E-01 |
| SAP130  | 0.257374 | 3.09E-09 | 1.25E-08 |
| SAP18   | -0.02134 | 6.29E-01 | 6.85E-01 |
| SAP30BP | 0.17572  | 6.09E-05 | 1.46E-04 |
| SAP30L  | -0.39832 | 4.99E-21 | 6.39E-20 |
| SAP30   | 0.383919 | 1.57E-19 | 1.76E-18 |
| SAPS1   | 0.207534 | 2.03E-06 | 5.93E-06 |
| SAPS2   | -0.32019 | 9.65E-14 | 6.26E-13 |
| SAPS3   | 0.208415 | 1.84E-06 | 5.39E-06 |
| SAR1A   | 0.0255   | 5.64E-01 | 6.24E-01 |
| SAR1B   | 0.105504 | 1.66E-02 | 2.71E-02 |
| SARDH   | -0.27164 | 3.66E-10 | 1.65E-09 |
| SARM1   | -0.31634 | 1.97E-13 | 1.24E-12 |
| SARNP   | 0.313041 | 3.59E-13 | 2.20E-12 |
| SARS2   | 0.149426 | 6.69E-04 | 1.38E-03 |
| SARS    | 0.000875 | 9.84E-01 | 9.88E-01 |
| SART1   | 0.125035 | 4.49E-03 | 8.12E-03 |
| SART3   | 0.320505 | 9.11E-14 | 5.92E-13 |
| SASH1   | -0.19778 | 6.12E-06 | 1.68E-05 |
| SASH3   | -0.13213 | 2.66E-03 | 4.99E-03 |
| SASS6   | 0.640461 | 8.44E-61 | 7.47E-59 |
| SAT1    | -0.08357 | 5.81E-02 | 8.45E-02 |
| SAT2    | -0.23222 | 9.81E-08 | 3.35E-07 |
| SATB1   | -0.3693  | 4.37E-18 | 4.29E-17 |
| SATB2   | 0.023937 | 5.88E-01 | 6.46E-01 |
| SATL1   | -0.08796 | 4.60E-02 | 6.84E-02 |
| SAV1    | -0.00069 | 9.88E-01 | 9.90E-01 |
| SBDSP1  | 0.059261 | 1.79E-01 | 2.32E-01 |
| SBDS    | -0.11122 | 1.15E-02 | 1.94E-02 |
| SBF1P1  | 0.014581 | 7.41E-01 | 7.85E-01 |
| SBF1    | -0.08937 | 4.26E-02 | 6.38E-02 |
| SBF2    | 0.150447 | 6.14E-04 | 1.27E-03 |
| SBK1    | -0.09838 | 2.56E-02 | 4.00E-02 |
| SBK2    | 0.15318  | 4.86E-04 | 1.02E-03 |
| SBNO1   | 0.312781 | 3.76E-13 | 2.31E-12 |
| SBNO2   | 0.104056 | 1.82E-02 | 2.94E-02 |
| SBSN    | 0.337807 | 3.27E-15 | 2.43E-14 |
| SC4MOL  | 0.136385 | 1.92E-03 | 3.69E-03 |
| SC5DL   | 0.039976 | 3.65E-01 | 4.32E-01 |
| SC65    | 0.405549 | 8.27E-22 | 1.12E-20 |
| SCAF1   | 0.04001  | 3.65E-01 | 4.31E-01 |
| SCAI    | -0.39253 | 2.03E-20 | 2.47E-19 |
| SCAMP1  | 0.043839 | 3.21E-01 | 3.86E-01 |
| SCAMP2  | -0.34716 | 4.94E-16 | 3.99E-15 |

|          |          |          |          |
|----------|----------|----------|----------|
| SCAMP3   | -0.05525 | 2.11E-01 | 2.67E-01 |
| SCAMP4   | -0.26063 | 1.92E-09 | 7.95E-09 |
| SCAMP5   | 0.13157  | 2.78E-03 | 5.19E-03 |
| SCAND1   | -0.00034 | 9.94E-01 | 9.95E-01 |
| SCAND2   | -0.34998 | 2.77E-16 | 2.29E-15 |
| SCAND3   | -0.02963 | 5.02E-01 | 5.67E-01 |
| SCAPER   | -0.32684 | 2.76E-14 | 1.88E-13 |
| SCAP     | -0.15753 | 3.32E-04 | 7.17E-04 |
| SCARA3   | -0.37831 | 5.72E-19 | 6.05E-18 |
| SCARA5   | -0.35877 | 4.33E-17 | 3.91E-16 |
| SCARB1   | 0.263256 | 1.30E-09 | 5.50E-09 |
| SCARB2   | 0.05721  | 1.95E-01 | 2.49E-01 |
| SCARF1   | -0.42648 | 3.55E-24 | 5.90E-23 |
| SCARF2   | -0.19343 | 9.84E-06 | 2.63E-05 |
| SCARNA10 | 0.039576 | 3.70E-01 | 4.36E-01 |
| SCARNA11 | 0.025751 | 5.60E-01 | 6.21E-01 |
| SCARNA12 | 0.185158 | 2.35E-05 | 6.00E-05 |
| SCARNA15 | -0.0012  | 9.78E-01 | 9.84E-01 |
| SCARNA16 | 0.076499 | 8.29E-02 | 1.16E-01 |
| SCARNA17 | -0.01893 | 6.68E-01 | 7.20E-01 |
| SCARNA18 | 0.123574 | 4.98E-03 | 8.95E-03 |
| SCARNA1  | 0.062677 | 1.56E-01 | 2.04E-01 |
| SCARNA20 | 0.104201 | 1.80E-02 | 2.91E-02 |
| SCARNA21 | 0.020635 | 6.40E-01 | 6.95E-01 |
| SCARNA22 | -0.02429 | 5.82E-01 | 6.41E-01 |
| SCARNA2  | -0.11763 | 7.54E-03 | 1.31E-02 |
| SCARNA3  | 0.001855 | 9.67E-01 | 9.74E-01 |
| SCARNA4  | 0.009541 | 8.29E-01 | 8.59E-01 |
| SCARNA5  | -0.05967 | 1.76E-01 | 2.28E-01 |
| SCARNA6  | -0.07417 | 9.27E-02 | 1.29E-01 |
| SCARNA7  | -0.26882 | 5.64E-10 | 2.49E-09 |
| SCARNA9L | 0.009247 | 8.34E-01 | 8.64E-01 |
| SCARNA9  | -0.06845 | 1.21E-01 | 1.63E-01 |
| SCCPDH   | 0.05765  | 1.91E-01 | 2.45E-01 |
| SCD5     | -0.03372 | 4.45E-01 | 5.12E-01 |
| SCD      | 0.208388 | 1.84E-06 | 5.40E-06 |
| SCEL     | -0.19107 | 1.27E-05 | 3.34E-05 |
| SCFD1    | 0.225375 | 2.36E-07 | 7.72E-07 |
| SCFD2    | 0.048348 | 2.73E-01 | 3.35E-01 |
| SCG2     | 0.039166 | 3.75E-01 | 4.41E-01 |
| SCG3     | 0.214381 | 9.09E-07 | 2.76E-06 |
| SCG5     | 0.23783  | 4.69E-08 | 1.65E-07 |
| SCGB1A1  | -0.31405 | 2.99E-13 | 1.85E-12 |
| SCGB1C1  | 0.096114 | 2.92E-02 | 4.52E-02 |

|         |          |          |          |
|---------|----------|----------|----------|
| SCGB1D1 | 0.028456 | 5.19E-01 | 5.83E-01 |
| SCGB1D2 | 0.097463 | 2.70E-02 | 4.20E-02 |
| SCGB2A1 | -0.23951 | 3.75E-08 | 1.34E-07 |
| SCGB2A2 | 0.014206 | 7.48E-01 | 7.90E-01 |
| SCGB3A1 | -0.50135 | 3.95E-34 | 1.30E-32 |
| SCGB3A2 | -0.53255 | 4.62E-39 | 2.03E-37 |
| SCGBL   | -0.22879 | 1.53E-07 | 5.11E-07 |
| SCGN    | -0.04205 | 3.41E-01 | 4.07E-01 |
| SCHIP1  | 0.138251 | 1.66E-03 | 3.22E-03 |
| SCIN    | -0.0674  | 1.27E-01 | 1.70E-01 |
| SCLT1   | 0.551583 | 2.47E-42 | 1.29E-40 |
| SCLY    | 0.125476 | 4.35E-03 | 7.89E-03 |
| SCMH1   | -0.29914 | 4.17E-12 | 2.30E-11 |
| SCML1   | 0.098557 | 2.53E-02 | 3.97E-02 |
| SCML2   | 0.393564 | 1.59E-20 | 1.94E-19 |
| SCML4   | -0.20889 | 1.74E-06 | 5.12E-06 |
| SCN10A  | -0.17312 | 7.85E-05 | 1.86E-04 |
| SCN11A  | -0.32481 | 4.05E-14 | 2.73E-13 |
| SCN1A   | -0.32085 | 8.53E-14 | 5.56E-13 |
| SCN1B   | -0.1393  | 1.53E-03 | 2.98E-03 |
| SCN2A   | -0.00313 | 9.43E-01 | 9.56E-01 |
| SCN2B   | -0.38937 | 4.34E-20 | 5.10E-19 |
| SCN3A   | 0.083501 | 5.83E-02 | 8.48E-02 |
| SCN3B   | -0.07338 | 9.62E-02 | 1.33E-01 |
| SCN4A   | 0.00813  | 8.54E-01 | 8.81E-01 |
| SCN4B   | -0.59448 | 1.57E-50 | 1.08E-48 |
| SCN5A   | 0.01015  | 8.18E-01 | 8.50E-01 |
| SCN7A   | -0.51212 | 8.93E-36 | 3.22E-34 |
| SCN8A   | 0.075941 | 8.51E-02 | 1.19E-01 |
| SCN9A   | -0.10425 | 1.80E-02 | 2.91E-02 |
| SCNM1   | 0.289844 | 2.00E-11 | 1.02E-10 |
| SCNN1A  | -0.23238 | 9.61E-08 | 3.29E-07 |
| SCNN1B  | -0.51735 | 1.35E-36 | 5.12E-35 |
| SCNN1D  | -0.1983  | 5.78E-06 | 1.60E-05 |
| SCNN1G  | -0.34309 | 1.13E-15 | 8.80E-15 |
| SCO1    | 0.227762 | 1.74E-07 | 5.79E-07 |
| SCO2    | -0.00304 | 9.45E-01 | 9.57E-01 |
| SCOC    | 0.16649  | 1.47E-04 | 3.35E-04 |
| SCP2    | -0.38287 | 2.00E-19 | 2.22E-18 |
| SCPEP1  | -0.16629 | 1.50E-04 | 3.41E-04 |
| SCRG1   | -0.17756 | 5.08E-05 | 1.23E-04 |
| SCRIB   | 0.051316 | 2.45E-01 | 3.05E-01 |
| SCRN1   | -0.03703 | 4.02E-01 | 4.68E-01 |
| SCRN2   | -0.2284  | 1.61E-07 | 5.36E-07 |

|         |          |          |          |
|---------|----------|----------|----------|
| SCRN3   | -0.00562 | 8.99E-01 | 9.18E-01 |
| SCRT1   | -0.0345  | 4.35E-01 | 5.01E-01 |
| SCRT2   | 0.122819 | 5.25E-03 | 9.39E-03 |
| SCTR    | -0.49262 | 7.72E-33 | 2.36E-31 |
| SCT     | 0.033817 | 4.44E-01 | 5.10E-01 |
| SCUBE1  | -0.16247 | 2.13E-04 | 4.75E-04 |
| SCUBE2  | -0.40662 | 6.32E-22 | 8.65E-21 |
| SCUBE3  | -0.15291 | 4.98E-04 | 1.04E-03 |
| SCXB    | -0.03829 | 3.86E-01 | 4.52E-01 |
| SCYL1   | 0.006568 | 8.82E-01 | 9.04E-01 |
| SCYL2   | 0.345049 | 7.61E-16 | 6.05E-15 |
| SCYL3   | -0.27289 | 3.02E-10 | 1.38E-09 |
| SDAD1   | 0.254874 | 4.43E-09 | 1.76E-08 |
| SDC1    | -0.22956 | 1.38E-07 | 4.66E-07 |
| SDC2    | -0.10211 | 2.05E-02 | 3.27E-02 |
| SDC3    | -0.11147 | 1.14E-02 | 1.91E-02 |
| SDC4P   | -0.11707 | 7.83E-03 | 1.35E-02 |
| SDC4    | -0.20557 | 2.55E-06 | 7.35E-06 |
| SDCBP2  | 0.023017 | 6.02E-01 | 6.60E-01 |
| SDCBP   | 0.070595 | 1.10E-01 | 1.49E-01 |
| SDCCAG1 | -0.02747 | 5.34E-01 | 5.97E-01 |
| SDCCAG3 | 0.186697 | 2.01E-05 | 5.16E-05 |
| SDCCAG8 | -0.37343 | 1.74E-18 | 1.77E-17 |
| SDF2L1  | 0.029613 | 5.03E-01 | 5.67E-01 |
| SDF2    | -0.06325 | 1.52E-01 | 2.00E-01 |
| SDF4    | -0.07311 | 9.75E-02 | 1.34E-01 |
| SDHAF1  | 0.061181 | 1.66E-01 | 2.16E-01 |
| SDHAF2  | 0.140456 | 1.40E-03 | 2.74E-03 |
| SDHAP1  | -0.01458 | 7.41E-01 | 7.85E-01 |
| SDHAP2  | 0.002499 | 9.55E-01 | 9.64E-01 |
| SDHAP3  | -0.29006 | 1.93E-11 | 9.87E-11 |
| SDHA    | 0.145534 | 9.25E-04 | 1.87E-03 |
| SDHB    | 0.238269 | 4.42E-08 | 1.57E-07 |
| SDHC    | 0.012473 | 7.78E-01 | 8.15E-01 |
| SDHD    | 0.087448 | 4.73E-02 | 7.01E-02 |
| SDK1    | -0.24069 | 3.20E-08 | 1.15E-07 |
| SDK2    | -0.22223 | 3.49E-07 | 1.12E-06 |
| SDPR    | -0.45078 | 3.85E-27 | 8.03E-26 |
| SDR16C5 | -0.23028 | 1.26E-07 | 4.26E-07 |
| SDR39U1 | -0.09873 | 2.51E-02 | 3.93E-02 |
| SDR42E1 | -0.18024 | 3.89E-05 | 9.59E-05 |
| SDR9C7  | 0.099912 | 2.34E-02 | 3.69E-02 |
| SDSL    | 0.128852 | 3.40E-03 | 6.27E-03 |
| SDS     | 0.293109 | 1.16E-11 | 6.07E-11 |



|           |           |          |          |
|-----------|-----------|----------|----------|
| SEBOX     | -0.13085  | 2.93E-03 | 5.46E-03 |
| SEC11A    | 0.034111  | 4.40E-01 | 5.06E-01 |
| SEC11C    | -0.07446  | 9.14E-02 | 1.27E-01 |
| SEC13     | 0.155241  | 4.06E-04 | 8.65E-04 |
| SEC14L1   | 0.019934  | 6.52E-01 | 7.05E-01 |
| SEC14L2   | 0.143306  | 1.11E-03 | 2.21E-03 |
| SEC14L3   | -0.41518  | 7.06E-23 | 1.04E-21 |
| SEC14L4   | -0.31437  | 2.82E-13 | 1.75E-12 |
| SEC14L5   | -0.21853  | 5.51E-07 | 1.73E-06 |
| SEC16A    | -0.10836  | 1.39E-02 | 2.30E-02 |
| SEC16B    | -0.11214  | 1.09E-02 | 1.84E-02 |
| SEC1      | -0.18972  | 1.46E-05 | 3.82E-05 |
| SEC22A    | 0.280167  | 9.63E-11 | 4.58E-10 |
| SEC22B    | 0.210708  | 1.40E-06 | 4.18E-06 |
| SEC22C    | -0.17062  | 9.98E-05 | 2.33E-04 |
| SEC23A    | 0.445514  | 1.77E-26 | 3.50E-25 |
| SEC23B    | 0.005367  | 9.03E-01 | 9.22E-01 |
| SEC23IP   | 0.076387  | 8.33E-02 | 1.17E-01 |
| SEC24A    | 0.177973  | 4.88E-05 | 1.19E-04 |
| SEC24B    | -0.03001  | 4.97E-01 | 5.62E-01 |
| SEC24C    | -0.11674  | 8.01E-03 | 1.38E-02 |
| SEC24D    | 0.132072  | 2.67E-03 | 5.01E-03 |
| SEC31A    | -0.16325  | 1.99E-04 | 4.44E-04 |
| SEC31B    | -0.31561  | 2.25E-13 | 1.41E-12 |
| SEC61A1   | 0.282055  | 7.12E-11 | 3.43E-10 |
| SEC61A2   | 0.228473  | 1.59E-07 | 5.31E-07 |
| SEC61B    | 0.14168   | 1.27E-03 | 2.50E-03 |
| SEC61G    | 0.405964  | 7.45E-22 | 1.01E-20 |
| SEC62     | -0.08474  | 5.46E-02 | 7.99E-02 |
| SEC63     | -0.14107  | 1.33E-03 | 2.62E-03 |
| SECISBP2L | -0.41594  | 5.80E-23 | 8.65E-22 |
| SECISBP2  | -0.34296  | 1.16E-15 | 9.03E-15 |
| SECTM1    | 0.165143  | 1.67E-04 | 3.76E-04 |
| SEH1L     | 0.330146  | 1.46E-14 | 1.02E-13 |
| SEL1L2    | -0.10194  | 2.07E-02 | 3.30E-02 |
| SEL1L3    | -0.1865   | 2.05E-05 | 5.26E-05 |
| SEL1L     | 0.053893  | 2.22E-01 | 2.80E-01 |
| SELENBP1  | -0.64952  | 4.90E-63 | 4.60E-61 |
| SELE      | -0.11262  | 1.05E-02 | 1.78E-02 |
| SELK      | -1.21E-05 | 1.00E+00 | 1.00E+00 |
| SELL      | -0.05398  | 2.21E-01 | 2.79E-01 |
| SELM      | -0.02526  | 5.67E-01 | 6.27E-01 |
| SELO      | -0.18687  | 1.97E-05 | 5.07E-05 |
| SELPLG    | -0.19382  | 9.43E-06 | 2.53E-05 |

|         |        |          |          |          |
|---------|--------|----------|----------|----------|
| SELP    |        | -0.36587 | 9.33E-18 | 8.89E-17 |
| SELS    |        | 0.08031  | 6.86E-02 | 9.85E-02 |
| SELT    |        | 0.224316 | 2.69E-07 | 8.77E-07 |
| SELV    |        | 0.292277 | 1.33E-11 | 6.93E-11 |
| SEMA3A  |        | 0.37323  | 1.82E-18 | 1.85E-17 |
| SEMA3B  |        | -0.24998 | 8.89E-09 | 3.41E-08 |
| SEMA3C  |        | 0.137942 | 1.70E-03 | 3.30E-03 |
| SEMA3D  |        | -0.05155 | 2.43E-01 | 3.03E-01 |
| SEMA3E  |        | -0.13628 | 1.94E-03 | 3.72E-03 |
| SEMA3F  |        | 0.102099 | 2.05E-02 | 3.27E-02 |
| SEMA3G  |        | -0.28847 | 2.51E-11 | 1.27E-10 |
| SEMA4A  |        | -0.49048 | 1.58E-32 | 4.73E-31 |
| SEMA4B  |        | 0.258789 | 2.52E-09 | 1.03E-08 |
| SEMA4C  |        | 0.031735 | 4.72E-01 | 5.38E-01 |
| SEMA4D  |        | -0.10659 | 1.55E-02 | 2.54E-02 |
| SEMA4F  |        | 0.081391 | 6.49E-02 | 9.37E-02 |
| SEMA4G  |        | -0.10324 | 1.91E-02 | 3.07E-02 |
| SEMA5A  |        | -0.30002 | 3.58E-12 | 1.99E-11 |
| SEMA5B  |        | 0.236928 | 5.29E-08 | 1.86E-07 |
| SEMA6A  |        | -0.13557 | 2.05E-03 | 3.92E-03 |
| SEMA6B  |        | 0.127285 | 3.81E-03 | 6.97E-03 |
| SEMA6C  |        | -0.08976 | 4.17E-02 | 6.26E-02 |
| SEMA6D  |        | -0.34351 | 1.04E-15 | 8.12E-15 |
| SEMA7A  |        | 0.21804  | 5.84E-07 | 1.82E-06 |
| SEMG1   |        | 0.043791 | 3.21E-01 | 3.86E-01 |
| SEMG2   |        | 0.009803 | 8.24E-01 | 8.55E-01 |
| SENP1   |        | 0.514188 | 4.25E-36 | 1.56E-34 |
| SENP2   |        | 0.342572 | 1.26E-15 | 9.73E-15 |
| SENP3   |        | 0.219084 | 5.14E-07 | 1.62E-06 |
| SENP5   |        | 0.348327 | 3.89E-16 | 3.17E-15 |
| SENP6   |        | -0.09766 | 2.67E-02 | 4.16E-02 |
| SENP7   |        | -0.21863 | 5.44E-07 | 1.70E-06 |
| SENP8   |        | -0.28233 | 6.81E-11 | 3.29E-10 |
|         | 15-Sep | 0.155904 | 3.84E-04 | 8.20E-04 |
| SEPHS1  |        | 0.322598 | 6.16E-14 | 4.07E-13 |
| SEPHS2  |        | 0.166262 | 1.50E-04 | 3.42E-04 |
| SEPN1   |        | -0.25439 | 4.75E-09 | 1.88E-08 |
| SEPP1   |        | -0.36143 | 2.45E-17 | 2.26E-16 |
| SEPSECS |        | -0.25155 | 7.13E-09 | 2.77E-08 |
|         | 10-Sep | -0.08477 | 5.46E-02 | 7.98E-02 |
|         | 11-Sep | 0.276692 | 1.67E-10 | 7.77E-10 |
|         | 12-Sep | 0.052845 | 2.31E-01 | 2.90E-01 |
|         | 14-Sep | 0.221822 | 3.67E-07 | 1.18E-06 |
|         | 1-Sep  | -0.14172 | 1.26E-03 | 2.50E-03 |

|           |       |          |          |          |
|-----------|-------|----------|----------|----------|
|           | 2-Sep | 0.22005  | 4.57E-07 | 1.45E-06 |
|           | 3-Sep | 0.271958 | 3.49E-10 | 1.57E-09 |
|           | 4-Sep | -0.49837 | 1.10E-33 | 3.51E-32 |
|           | 5-Sep | 0.053673 | 2.24E-01 | 2.82E-01 |
|           | 6-Sep | -0.02641 | 5.50E-01 | 6.12E-01 |
| SEPT7L    |       | -0.01512 | 7.32E-01 | 7.77E-01 |
| SEPT7P2   |       | -0.15433 | 4.40E-04 | 9.32E-04 |
|           | 7-Sep | 0.28369  | 5.47E-11 | 2.66E-10 |
|           | 8-Sep | 0.076869 | 8.14E-02 | 1.15E-01 |
|           | 9-Sep | 0.12919  | 3.31E-03 | 6.13E-03 |
| SEPW1     |       | -0.40025 | 3.10E-21 | 4.02E-20 |
| SEPX1     |       | 0.136567 | 1.89E-03 | 3.64E-03 |
| SERAC1    |       | 0.029837 | 4.99E-01 | 5.64E-01 |
| SERBP1    |       | 0.369171 | 4.50E-18 | 4.41E-17 |
| SERF1A    |       | 0.123022 | 5.18E-03 | 9.27E-03 |
| SERF2     |       | -0.05412 | 2.20E-01 | 2.77E-01 |
| SERGEF    |       | -0.2468  | 1.39E-08 | 5.19E-08 |
| SERHL2    |       | -0.22364 | 2.93E-07 | 9.50E-07 |
| SERHL     |       | -0.066   | 1.35E-01 | 1.80E-01 |
| SERINC1   |       | -0.2345  | 7.29E-08 | 2.52E-07 |
| SERINC2   |       | -0.09471 | 3.16E-02 | 4.86E-02 |
| SERINC3   |       | 0.039816 | 3.67E-01 | 4.33E-01 |
| SERINC4   |       | -0.14066 | 1.37E-03 | 2.70E-03 |
| SERINC5   |       | -0.19008 | 1.41E-05 | 3.69E-05 |
| SERP1     |       | -0.09857 | 2.53E-02 | 3.97E-02 |
| SERP2     |       | -0.28979 | 2.02E-11 | 1.03E-10 |
| SERPINA10 |       | 0.006863 | 8.77E-01 | 9.00E-01 |
| SERPINA11 |       | 0.002487 | 9.55E-01 | 9.64E-01 |
| SERPINA12 |       | 0.022194 | 6.15E-01 | 6.72E-01 |
| SERPINA13 |       | 0.049311 | 2.64E-01 | 3.25E-01 |
| SERPINA1  |       | -0.19416 | 9.09E-06 | 2.45E-05 |
| SERPINA3  |       | 0.00632  | 8.86E-01 | 9.08E-01 |
| SERPINA4  |       | 0.036038 | 4.14E-01 | 4.81E-01 |
| SERPINA5  |       | 0.157758 | 3.26E-04 | 7.04E-04 |
| SERPINA6  |       | -0.1091  | 1.32E-02 | 2.20E-02 |
| SERPINA7  |       | -0.19071 | 1.32E-05 | 3.47E-05 |
| SERPINA9  |       | -0.14223 | 1.21E-03 | 2.40E-03 |
| SERPINB10 |       | -0.27696 | 1.60E-10 | 7.47E-10 |
| SERPINB11 |       | -0.06504 | 1.41E-01 | 1.87E-01 |
| SERPINB12 |       | 0.110584 | 1.20E-02 | 2.02E-02 |
| SERPINB13 |       | -0.00405 | 9.27E-01 | 9.42E-01 |
| SERPINB1  |       | 0.039398 | 3.72E-01 | 4.39E-01 |
| SERPINB2  |       | -0.01611 | 7.15E-01 | 7.62E-01 |
| SERPINB3  |       | 0.159347 | 2.83E-04 | 6.17E-04 |

|          |          |          |          |
|----------|----------|----------|----------|
| SERPINB4 | 0.216694 | 6.88E-07 | 2.13E-06 |
| SERPINB5 | 0.313399 | 3.36E-13 | 2.07E-12 |
| SERPINB6 | -0.1821  | 3.22E-05 | 8.03E-05 |
| SERPINB7 | 0.207632 | 2.01E-06 | 5.87E-06 |
| SERPINB8 | -0.00442 | 9.20E-01 | 9.36E-01 |
| SERPINB9 | 0.160109 | 2.64E-04 | 5.79E-04 |
| SERPINC1 | -0.22439 | 2.67E-07 | 8.70E-07 |
| SERPIND1 | -0.25801 | 2.82E-09 | 1.14E-08 |
| SERPINE1 | 0.22853  | 1.58E-07 | 5.27E-07 |
| SERPINE2 | 0.20485  | 2.77E-06 | 7.95E-06 |
| SERPINE3 | 0.072637 | 9.96E-02 | 1.37E-01 |
| SERPINF1 | -0.06804 | 1.23E-01 | 1.66E-01 |
| SERPINF2 | -0.2554  | 4.11E-09 | 1.64E-08 |
| SERPING1 | -0.12989 | 3.15E-03 | 5.84E-03 |
| SERPINH1 | 0.148959 | 6.96E-04 | 1.43E-03 |
| SERPINI1 | 0.080727 | 6.72E-02 | 9.66E-02 |
| SERPINI2 | -0.19675 | 6.85E-06 | 1.87E-05 |
| SERTAD1  | -0.0505  | 2.53E-01 | 3.13E-01 |
| SERTAD2  | 0.085128 | 5.35E-02 | 7.84E-02 |
| SERTAD3  | -0.00723 | 8.70E-01 | 8.94E-01 |
| SERTAD4  | -0.21729 | 6.40E-07 | 1.99E-06 |
| SESN1    | -0.4063  | 6.85E-22 | 9.34E-21 |
| SESN2    | -0.1587  | 3.00E-04 | 6.52E-04 |
| SESN3    | -0.21896 | 5.23E-07 | 1.64E-06 |
| SESTD1   | -0.18131 | 3.49E-05 | 8.67E-05 |
| SETBP1   | -0.38373 | 1.64E-19 | 1.84E-18 |
| SETD1A   | -0.02801 | 5.26E-01 | 5.89E-01 |
| SETD1B   | -0.15817 | 3.14E-04 | 6.81E-04 |
| SETD2    | -0.22307 | 3.14E-07 | 1.02E-06 |
| SETD3    | -0.07517 | 8.84E-02 | 1.23E-01 |
| SETD4    | -0.3983  | 5.01E-21 | 6.42E-20 |
| SETD5    | 0.001055 | 9.81E-01 | 9.85E-01 |
| SETD6    | -0.12134 | 5.83E-03 | 1.03E-02 |
| SETD7    | 0.039373 | 3.73E-01 | 4.39E-01 |
| SETD8    | 0.324678 | 4.16E-14 | 2.79E-13 |
| SETDB1   | -0.02648 | 5.49E-01 | 6.11E-01 |
| SETDB2   | -0.45687 | 6.37E-28 | 1.41E-26 |
| SETMAR   | -0.15326 | 4.83E-04 | 1.01E-03 |
| SETX     | -0.14704 | 8.17E-04 | 1.66E-03 |
| SET      | 0.398807 | 4.42E-21 | 5.68E-20 |
| SEZ6L2   | -0.09906 | 2.46E-02 | 3.86E-02 |
| SEZ6L    | -0.09534 | 3.05E-02 | 4.71E-02 |
| SEZ6     | 0.057643 | 1.92E-01 | 2.45E-01 |
| SF1      | -0.05969 | 1.76E-01 | 2.28E-01 |

|           |          |          |          |
|-----------|----------|----------|----------|
| SF3A1     | -0.1105  | 1.21E-02 | 2.02E-02 |
| SF3A2     | 0.154791 | 4.23E-04 | 8.97E-04 |
| SF3A3     | 0.281357 | 7.96E-11 | 3.82E-10 |
| SF3B14    | 0.436896 | 2.03E-25 | 3.72E-24 |
| SF3B1     | 0.020418 | 6.44E-01 | 6.98E-01 |
| SF3B2     | 0.26296  | 1.36E-09 | 5.73E-09 |
| SF3B3     | 0.19842  | 5.70E-06 | 1.58E-05 |
| SF3B4     | 0.244754 | 1.84E-08 | 6.80E-08 |
| SF3B5     | 0.139127 | 1.55E-03 | 3.02E-03 |
| SF4       | -0.12538 | 4.38E-03 | 7.94E-03 |
| SFI1      | -0.24742 | 1.27E-08 | 4.78E-08 |
| SFMBT1    | 0.088318 | 4.51E-02 | 6.72E-02 |
| SFMBT2    | 0.069827 | 1.13E-01 | 1.54E-01 |
| SFN       | 0.115424 | 8.75E-03 | 1.50E-02 |
| SFPQ      | 0.382995 | 1.94E-19 | 2.16E-18 |
| SFRP1     | -0.03097 | 4.83E-01 | 5.48E-01 |
| SFRP2     | 0.217471 | 6.26E-07 | 1.95E-06 |
| SFRP4     | -0.13415 | 2.28E-03 | 4.32E-03 |
| SFRP5     | -0.1296  | 3.22E-03 | 5.96E-03 |
| SFRS11    | -0.0815  | 6.46E-02 | 9.32E-02 |
| SFRS12IP1 | -0.08085 | 6.68E-02 | 9.61E-02 |
| SFRS12    | -0.21349 | 1.01E-06 | 3.06E-06 |
| SFRS13A   | 0.136125 | 1.96E-03 | 3.76E-03 |
| SFRS13B   | 0.315033 | 2.50E-13 | 1.56E-12 |
| SFRS14    | -0.06458 | 1.43E-01 | 1.90E-01 |
| SFRS15    | -0.03553 | 4.21E-01 | 4.87E-01 |
| SFRS16    | -0.03848 | 3.83E-01 | 4.50E-01 |
| SFRS17A   | -0.18835 | 1.69E-05 | 4.38E-05 |
| SFRS18    | -0.26886 | 5.61E-10 | 2.47E-09 |
| SFRS1     | 0.357159 | 6.12E-17 | 5.43E-16 |
| SFRS2B    | -0.41685 | 4.57E-23 | 6.88E-22 |
| SFRS2IP   | 0.031621 | 4.74E-01 | 5.40E-01 |
| SFRS2     | 0.318534 | 1.31E-13 | 8.40E-13 |
| SFRS3     | 0.286079 | 3.71E-11 | 1.84E-10 |
| SFRS4     | -0.11763 | 7.53E-03 | 1.31E-02 |
| SFRS5     | -0.4075  | 5.06E-22 | 6.97E-21 |
| SFRS6     | -0.19164 | 1.19E-05 | 3.16E-05 |
| SFRS7     | 0.316383 | 1.95E-13 | 1.23E-12 |
| SFRS8     | 0.04834  | 2.74E-01 | 3.35E-01 |
| SFRS9     | 0.511152 | 1.26E-35 | 4.51E-34 |
| SFT2D1    | 0.089534 | 4.23E-02 | 6.33E-02 |
| SFT2D2    | 0.040776 | 3.56E-01 | 4.22E-01 |
| SFT2D3    | -0.19404 | 9.21E-06 | 2.48E-05 |
| SFTA1P    | -0.58164 | 6.00E-48 | 3.88E-46 |

|         |          |           |           |
|---------|----------|-----------|-----------|
| SFTA2   | -0.4739  | 3.43E-30  | 8.94E-29  |
| SFTA3   | -0.49375 | 5.27E-33  | 1.62E-31  |
| SFTP A1 | -0.35603 | 7.77E-17  | 6.80E-16  |
| SFTP A2 | -0.3453  | 7.24E-16  | 5.76E-15  |
| SFTP B  | -0.5318  | 6.16E-39  | 2.68E-37  |
| SFTP C  | -0.34098 | 1.73E-15  | 1.32E-14  |
| SFTP D  | -0.46594 | 4.08E-29  | 9.89E-28  |
| SFXN1   | 0.523957 | 1.19E-37  | 4.70E-36  |
| SFXN2   | -0.22124 | 3.94E-07  | 1.26E-06  |
| SFXN3   | -0.22214 | 3.53E-07  | 1.13E-06  |
| SFXN4   | 0.251092 | 7.60E-09  | 2.94E-08  |
| SFXN5   | 0.232499 | 9.46E-08  | 3.24E-07  |
| SGCA    | -0.45983 | 2.63E-28  | 5.97E-27  |
| SGCB    | 0.009395 | 8.32E-01  | 8.61E-01  |
| SGCD    | -0.24167 | 2.80E-08  | 1.01E-07  |
| SGCE    | 0.12043  | 6.21E-03  | 1.10E-02  |
| SGCG    | -0.26797 | 6.42E-10  | 2.81E-09  |
| SGCZ    | 0.101124 | 2.17E-02  | 3.45E-02  |
| SGEF    | -0.15545 | 3.99E-04  | 8.51E-04  |
| SGIP1   | -0.16339 | 1.96E-04  | 4.38E-04  |
| SGK196  | 0.106358 | 1.58E-02  | 2.58E-02  |
| SGK1    | -0.1947  | 8.58E-06  | 2.32E-05  |
| SGK223  | -0.24046 | 3.30E-08  | 1.19E-07  |
| SGK269  | -0.32685 | 2.76E-14  | 1.88E-13  |
| SGK2    | -0.00272 | 9.51E-01  | 9.61E-01  |
| SGK3    | -0.06976 | 1.14E-01  | 1.55E-01  |
| SGK494  | -0.04561 | 3.02E-01  | 3.65E-01  |
| SGMS1   | -0.1001  | 2.31E-02  | 3.65E-02  |
| SGMS2   | -0.31418 | 2.92E-13  | 1.81E-12  |
| SGOL1   | 0.887019 | 2.70E-174 | 5.39E-171 |
| SGOL2   | 0.784276 | 1.98E-108 | 3.66E-106 |
| SGPL1   | 0.248508 | 1.09E-08  | 4.14E-08  |
| SGPP1   | -0.04086 | 3.55E-01  | 4.21E-01  |
| SGPP2   | -0.16632 | 1.50E-04  | 3.40E-04  |
| SGSH    | -0.38718 | 7.28E-20  | 8.38E-19  |
| SGSM1   | -0.30259 | 2.29E-12  | 1.30E-11  |
| SGSM2   | -0.39893 | 4.29E-21  | 5.52E-20  |
| SGSM3   | -0.32344 | 5.26E-14  | 3.50E-13  |
| SGTA    | 0.20878  | 1.76E-06  | 5.18E-06  |
| SGTB    | 0.190586 | 1.33E-05  | 3.51E-05  |
| SH2B1   | -0.3787  | 5.24E-19  | 5.58E-18  |
| SH2B2   | 0.197088 | 6.61E-06  | 1.81E-05  |
| SH2B3   | -0.05817 | 1.88E-01  | 2.41E-01  |
| SH2D1A  | -0.00158 | 9.72E-01  | 9.78E-01  |

|          |          |          |          |
|----------|----------|----------|----------|
| SH2D1B   | 0.112182 | 1.08E-02 | 1.83E-02 |
| SH2D2A   | 0.300151 | 3.50E-12 | 1.95E-11 |
| SH2D3A   | -0.05706 | 1.96E-01 | 2.51E-01 |
| SH2D3C   | -0.35945 | 3.75E-17 | 3.42E-16 |
| SH2D4A   | -0.25393 | 5.07E-09 | 2.00E-08 |
| SH2D4B   | -0.07323 | 9.69E-02 | 1.34E-01 |
| SH2D5    | 0.416548 | 4.95E-23 | 7.42E-22 |
| SH2D6    | -0.10397 | 1.83E-02 | 2.95E-02 |
| SH2D7    | -0.00297 | 9.46E-01 | 9.58E-01 |
| SH3BGRL2 | -0.38891 | 4.83E-20 | 5.66E-19 |
| SH3BGRL3 | 0.131914 | 2.70E-03 | 5.07E-03 |
| SH3BGRL  | -0.25421 | 4.88E-09 | 1.93E-08 |
| SH3BGR   | -0.20712 | 2.13E-06 | 6.21E-06 |
| SH3BP1   | 0.31717  | 1.69E-13 | 1.07E-12 |
| SH3BP2   | 0.128458 | 3.50E-03 | 6.44E-03 |
| SH3BP4   | -0.10719 | 1.50E-02 | 2.46E-02 |
| SH3BP5L  | -0.15372 | 4.64E-04 | 9.78E-04 |
| SH3BP5   | -0.30474 | 1.58E-12 | 9.09E-12 |
| SH3D19   | -0.22705 | 1.91E-07 | 6.31E-07 |
| SH3D20   | -0.12391 | 4.86E-03 | 8.75E-03 |
| SH3GL1   | 0.302141 | 2.48E-12 | 1.40E-11 |
| SH3GL2   | -0.00354 | 9.36E-01 | 9.50E-01 |
| SH3GL3   | -0.12689 | 3.92E-03 | 7.17E-03 |
| SH3GLB1  | 0.125616 | 4.30E-03 | 7.81E-03 |
| SH3GLB2  | -0.16687 | 1.42E-04 | 3.24E-04 |
| SH3KBP1  | 0.043921 | 3.20E-01 | 3.85E-01 |
| SH3PXD2A | -0.15884 | 2.96E-04 | 6.44E-04 |
| SH3PXD2B | 0.21328  | 1.04E-06 | 3.13E-06 |
| SH3RF1   | -0.29697 | 6.04E-12 | 3.27E-11 |
| SH3RF2   | -0.0587  | 1.83E-01 | 2.36E-01 |
| SH3RF3   | -0.18429 | 2.57E-05 | 6.51E-05 |
| SH3TC1   | -0.21571 | 7.75E-07 | 2.38E-06 |
| SH3TC2   | 0.077167 | 8.02E-02 | 1.13E-01 |
| SH3YL1   | -0.22213 | 3.54E-07 | 1.14E-06 |
| SHANK1   | -0.00444 | 9.20E-01 | 9.36E-01 |
| SHANK2   | -0.32634 | 3.03E-14 | 2.06E-13 |
| SHANK3   | -0.24755 | 1.25E-08 | 4.70E-08 |
| SHARPIN  | -0.09094 | 3.91E-02 | 5.90E-02 |
| SHBG     | -0.07    | 1.13E-01 | 1.53E-01 |
| SHB      | -0.06807 | 1.23E-01 | 1.66E-01 |
| SHC1     | 0.076058 | 8.46E-02 | 1.19E-01 |
| SHC2     | -0.23035 | 1.25E-07 | 4.23E-07 |
| SHC3     | -0.27448 | 2.36E-10 | 1.08E-09 |
| SHC4     | -0.03275 | 4.58E-01 | 5.25E-01 |

|          |          |           |           |
|----------|----------|-----------|-----------|
| SHCBP1   | 0.826768 | 2.88E-130 | 8.33E-128 |
| SHD      | 0.200381 | 4.59E-06  | 1.29E-05  |
| SHE      | -0.49512 | 3.32E-33  | 1.03E-31  |
| SHFM1    | 0.356327 | 7.30E-17  | 6.41E-16  |
| SHF      | -0.17217 | 8.60E-05  | 2.02E-04  |
| SHH      | -0.48436 | 1.19E-31  | 3.39E-30  |
| SHISA2   | -0.24033 | 3.36E-08  | 1.21E-07  |
| SHISA3   | -0.23487 | 6.94E-08  | 2.41E-07  |
| SHISA4   | -0.18004 | 3.97E-05  | 9.78E-05  |
| SHISA5   | 0.027426 | 5.35E-01  | 5.98E-01  |
| SHISA6   | -0.28991 | 1.98E-11  | 1.01E-10  |
| SHISA7   | 0.113534 | 9.92E-03  | 1.68E-02  |
| SHISA9   | 0.038459 | 3.84E-01  | 4.50E-01  |
| SHKBP1   | 0.218082 | 5.81E-07  | 1.82E-06  |
| SHMT1    | -0.11344 | 9.98E-03  | 1.69E-02  |
| SHMT2    | 0.477633 | 1.05E-30  | 2.82E-29  |
| SHOC2    | -0.07091 | 1.08E-01  | 1.47E-01  |
| SHOX2    | 0.477825 | 9.83E-31  | 2.66E-29  |
| SHOX     | -0.01157 | 7.93E-01  | 8.29E-01  |
| SHPK     | -0.18239 | 3.13E-05  | 7.82E-05  |
| SHPRH    | -0.03439 | 4.36E-01  | 5.03E-01  |
| SHQ1     | 0.113087 | 1.02E-02  | 1.73E-02  |
| SHROOM1  | -0.13386 | 2.33E-03  | 4.42E-03  |
| SHROOM2  | -0.16248 | 2.13E-04  | 4.74E-04  |
| SHROOM3  | -0.35349 | 1.33E-16  | 1.13E-15  |
| SHROOM4  | -0.46814 | 2.07E-29  | 5.14E-28  |
| SIAE     | -0.42673 | 3.32E-24  | 5.52E-23  |
| SIAH1    | 0.013487 | 7.60E-01  | 8.00E-01  |
| SIAH2    | 0.240524 | 3.27E-08  | 1.18E-07  |
| SIAH3    | -0.20402 | 3.04E-06  | 8.70E-06  |
| SIDT1    | -0.107   | 1.51E-02  | 2.49E-02  |
| SIDT2    | -0.44585 | 1.61E-26  | 3.19E-25  |
| SIGIRR   | -0.34028 | 2.00E-15  | 1.51E-14  |
| SIGLEC10 | 0.121822 | 5.64E-03  | 1.00E-02  |
| SIGLEC11 | -0.08146 | 6.47E-02  | 9.34E-02  |
| SIGLEC12 | 0.094831 | 3.14E-02  | 4.83E-02  |
| SIGLEC14 | -0.00858 | 8.46E-01  | 8.74E-01  |
| SIGLEC15 | 0.137774 | 1.72E-03  | 3.34E-03  |
| SIGLEC16 | -0.05115 | 2.47E-01  | 3.07E-01  |
| SIGLEC1  | -0.07653 | 8.27E-02  | 1.16E-01  |
| SIGLEC5  | -0.02864 | 5.17E-01  | 5.81E-01  |
| SIGLEC6  | -0.2561  | 3.71E-09  | 1.49E-08  |
| SIGLEC7  | 0.0306   | 4.88E-01  | 5.53E-01  |
| SIGLEC8  | -0.19377 | 9.48E-06  | 2.55E-05  |



|          |          |           |           |
|----------|----------|-----------|-----------|
| SIGLEC9  | -0.00386 | 9.30E-01  | 9.45E-01  |
| SIGLECP3 | -0.3936  | 1.57E-20  | 1.93E-19  |
| SIGMAR1  | 0.345939 | 6.35E-16  | 5.09E-15  |
| SIK1     | -0.19007 | 1.41E-05  | 3.69E-05  |
| SIK2     | -0.13893 | 1.58E-03  | 3.06E-03  |
| SIK3     | -0.1717  | 8.99E-05  | 2.11E-04  |
| SIKE1    | 0.225015 | 2.47E-07  | 8.07E-07  |
| SIL1     | -0.26022 | 2.04E-09  | 8.41E-09  |
| SILV     | 0.071839 | 1.03E-01  | 1.42E-01  |
| SIM1     | 0.193531 | 9.73E-06  | 2.61E-05  |
| SIM2     | 0.100515 | 2.25E-02  | 3.57E-02  |
| SIN3A    | -0.09482 | 3.14E-02  | 4.83E-02  |
| SIN3B    | -0.15061 | 6.06E-04  | 1.26E-03  |
| SIP1     | 0.390018 | 3.71E-20  | 4.40E-19  |
| SIPA1L1  | 0.020906 | 6.36E-01  | 6.91E-01  |
| SIPA1L2  | -0.16437 | 1.79E-04  | 4.03E-04  |
| SIPA1L3  | -0.10981 | 1.27E-02  | 2.11E-02  |
| SIPA1    | -0.00806 | 8.55E-01  | 8.82E-01  |
| SIRPA    | 0.025535 | 5.63E-01  | 6.24E-01  |
| SIRPB1   | -0.01298 | 7.69E-01  | 8.08E-01  |
| SIRPB2   | -0.05005 | 2.57E-01  | 3.18E-01  |
| SIRPD    | -0.0505  | 2.53E-01  | 3.13E-01  |
| SIRPG    | 0.091888 | 3.71E-02  | 5.62E-02  |
| SIRT1    | -0.12497 | 4.51E-03  | 8.15E-03  |
| SIRT2    | -0.13428 | 2.26E-03  | 4.29E-03  |
| SIRT3    | -0.43844 | 1.32E-25  | 2.45E-24  |
| SIRT4    | -0.27779 | 1.40E-10  | 6.60E-10  |
| SIRT5    | -0.09127 | 3.84E-02  | 5.80E-02  |
| SIRT6    | 0.070863 | 1.08E-01  | 1.48E-01  |
| SIRT7    | 0.075449 | 8.72E-02  | 1.22E-01  |
| SIT1     | -0.07539 | 8.74E-02  | 1.22E-01  |
| SIVA1    | 0.102287 | 2.02E-02  | 3.24E-02  |
| SIX1     | -0.07727 | 7.98E-02  | 1.13E-01  |
| SIX2     | 0.054584 | 2.16E-01  | 2.73E-01  |
| SIX3     | 0.223528 | 2.97E-07  | 9.63E-07  |
| SIX4     | 0.120486 | 6.19E-03  | 1.09E-02  |
| SIX5     | -0.16096 | 2.45E-04  | 5.39E-04  |
| SIX6     | 0.08281  | 6.04E-02  | 8.76E-02  |
| SI       | 0.039367 | 3.73E-01  | 4.39E-01  |
| SKA1     | 0.85851  | 6.53E-151 | 3.53E-148 |
| SKA2     | 0.53962  | 2.97E-40  | 1.41E-38  |
| SKA3     | 0.866985 | 2.73E-157 | 2.10E-154 |
| SKAP1    | 0.076474 | 8.30E-02  | 1.17E-01  |
| SKAP2    | 0.252317 | 6.39E-09  | 2.50E-08  |

|         |          |          |          |
|---------|----------|----------|----------|
| SKIL    | 0.215022 | 8.41E-07 | 2.57E-06 |
| SKINTL  | -0.34163 | 1.52E-15 | 1.17E-14 |
| SKIV2L2 | 0.041221 | 3.51E-01 | 4.17E-01 |
| SKIV2L  | 0.082557 | 6.12E-02 | 8.87E-02 |
| SKI     | -0.32491 | 3.98E-14 | 2.68E-13 |
| SKP1    | -0.06829 | 1.22E-01 | 1.64E-01 |
| SKP2    | 0.589909 | 1.35E-49 | 9.05E-48 |
| SLA2    | 0.08564  | 5.21E-02 | 7.65E-02 |
| SLAIN1  | -0.27324 | 2.86E-10 | 1.31E-09 |
| SLAIN2  | -0.08725 | 4.78E-02 | 7.07E-02 |
| SLAMF1  | -0.10038 | 2.27E-02 | 3.60E-02 |
| SLAMF6  | -0.03752 | 3.95E-01 | 4.62E-01 |
| SLAMF7  | 0.083813 | 5.73E-02 | 8.35E-02 |
| SLAMF8  | 0.103776 | 1.85E-02 | 2.98E-02 |
| SLAMF9  | 0.313191 | 3.49E-13 | 2.15E-12 |
| SLA     | -0.05893 | 1.82E-01 | 2.35E-01 |
| SLBP    | 0.500925 | 4.57E-34 | 1.50E-32 |
| SLC10A1 | -0.13931 | 1.53E-03 | 2.98E-03 |
| SLC10A2 | -0.24972 | 9.22E-09 | 3.53E-08 |
| SLC10A3 | 0.026874 | 5.43E-01 | 6.05E-01 |
| SLC10A4 | 0.100785 | 2.22E-02 | 3.52E-02 |
| SLC10A5 | -0.18387 | 2.69E-05 | 6.78E-05 |
| SLC10A6 | -0.04234 | 3.38E-01 | 4.03E-01 |
| SLC10A7 | -0.07597 | 8.50E-02 | 1.19E-01 |
| SLC11A1 | -0.011   | 8.03E-01 | 8.38E-01 |
| SLC11A2 | -0.20997 | 1.53E-06 | 4.53E-06 |
| SLC12A1 | 0.071832 | 1.03E-01 | 1.42E-01 |
| SLC12A2 | -0.04778 | 2.79E-01 | 3.41E-01 |
| SLC12A3 | 0.025467 | 5.64E-01 | 6.24E-01 |
| SLC12A4 | -0.36458 | 1.23E-17 | 1.17E-16 |
| SLC12A5 | 0.000235 | 9.96E-01 | 9.96E-01 |
| SLC12A6 | -0.18466 | 2.48E-05 | 6.29E-05 |
| SLC12A7 | 0.059734 | 1.76E-01 | 2.28E-01 |
| SLC12A8 | 0.355837 | 8.10E-17 | 7.07E-16 |
| SLC12A9 | -0.1501  | 6.32E-04 | 1.31E-03 |
| SLC13A1 | -0.00454 | 9.18E-01 | 9.35E-01 |
| SLC13A2 | -0.21766 | 6.12E-07 | 1.91E-06 |
| SLC13A3 | -0.13588 | 2.00E-03 | 3.83E-03 |
| SLC13A4 | -0.14498 | 9.68E-04 | 1.95E-03 |
| SLC13A5 | 0.13986  | 1.46E-03 | 2.86E-03 |
| SLC14A1 | -0.45219 | 2.54E-27 | 5.39E-26 |
| SLC14A2 | -0.28183 | 7.38E-11 | 3.55E-10 |
| SLC15A1 | 0.184586 | 2.50E-05 | 6.33E-05 |
| SLC15A2 | -0.4222  | 1.11E-23 | 1.78E-22 |

|          |          |          |          |
|----------|----------|----------|----------|
| SLC15A3  | -0.13037 | 3.04E-03 | 5.65E-03 |
| SLC15A4  | 0.309133 | 7.24E-13 | 4.32E-12 |
| SLC16A10 | 0.112174 | 1.09E-02 | 1.83E-02 |
| SLC16A11 | -0.52483 | 8.57E-38 | 3.45E-36 |
| SLC16A12 | -0.32042 | 9.24E-14 | 6.01E-13 |
| SLC16A13 | 0.093542 | 3.38E-02 | 5.17E-02 |
| SLC16A14 | 0.124383 | 4.70E-03 | 8.48E-03 |
| SLC16A1  | 0.449539 | 5.53E-27 | 1.13E-25 |
| SLC16A2  | -0.06039 | 1.71E-01 | 2.23E-01 |
| SLC16A3  | 0.359269 | 3.90E-17 | 3.54E-16 |
| SLC16A4  | -0.2981  | 4.98E-12 | 2.72E-11 |
| SLC16A5  | -0.33875 | 2.71E-15 | 2.03E-14 |
| SLC16A6  | 0.104874 | 1.73E-02 | 2.80E-02 |
| SLC16A7  | -0.2338  | 7.99E-08 | 2.76E-07 |
| SLC16A8  | 0.027496 | 5.34E-01 | 5.97E-01 |
| SLC16A9  | -0.04799 | 2.77E-01 | 3.39E-01 |
| SLC17A1  | -0.17255 | 8.30E-05 | 1.95E-04 |
| SLC17A2  | 0.008983 | 8.39E-01 | 8.68E-01 |
| SLC17A3  | -0.21948 | 4.90E-07 | 1.54E-06 |
| SLC17A4  | -0.01462 | 7.41E-01 | 7.84E-01 |
| SLC17A5  | -0.03644 | 4.09E-01 | 4.76E-01 |
| SLC17A6  | -0.00862 | 8.45E-01 | 8.73E-01 |
| SLC17A7  | 0.101756 | 2.09E-02 | 3.33E-02 |
| SLC17A8  | -0.14728 | 8.01E-04 | 1.63E-03 |
| SLC17A9  | -0.1179  | 7.40E-03 | 1.29E-02 |
| SLC18A1  | -0.09875 | 2.50E-02 | 3.93E-02 |
| SLC18A2  | -0.30238 | 2.38E-12 | 1.35E-11 |
| SLC18A3  | 0.017273 | 6.96E-01 | 7.45E-01 |
| SLC19A1  | 0.060944 | 1.67E-01 | 2.18E-01 |
| SLC19A2  | 0.038978 | 3.77E-01 | 4.44E-01 |
| SLC19A3  | -0.19494 | 8.35E-06 | 2.26E-05 |
| SLC1A1   | -0.14136 | 1.30E-03 | 2.56E-03 |
| SLC1A2   | -0.29619 | 6.90E-12 | 3.70E-11 |
| SLC1A3   | 0.012504 | 7.77E-01 | 8.15E-01 |
| SLC1A4   | 0.076703 | 8.20E-02 | 1.15E-01 |
| SLC1A5   | 0.160936 | 2.45E-04 | 5.40E-04 |
| SLC1A6   | 0.253344 | 5.52E-09 | 2.17E-08 |
| SLC1A7   | -0.32663 | 2.87E-14 | 1.96E-13 |
| SLC20A1  | 0.434735 | 3.71E-25 | 6.62E-24 |
| SLC20A2  | -0.12902 | 3.36E-03 | 6.20E-03 |
| SLC22A10 | -0.15226 | 5.26E-04 | 1.10E-03 |
| SLC22A11 | 0.021612 | 6.25E-01 | 6.80E-01 |
| SLC22A12 | -0.0233  | 5.98E-01 | 6.55E-01 |
| SLC22A13 | 0.042725 | 3.33E-01 | 3.99E-01 |

|            |          |          |          |
|------------|----------|----------|----------|
| SLC22A14   | 0.011184 | 8.00E-01 | 8.35E-01 |
| SLC22A15   | -0.2866  | 3.41E-11 | 1.69E-10 |
| SLC22A16   | -0.0996  | 2.38E-02 | 3.75E-02 |
| SLC22A17   | -0.23742 | 4.95E-08 | 1.74E-07 |
| SLC22A18AS | 0.016701 | 7.05E-01 | 7.53E-01 |
| SLC22A18   | -0.24379 | 2.10E-08 | 7.70E-08 |
| SLC22A1    | 0.050477 | 2.53E-01 | 3.14E-01 |
| SLC22A20   | -0.05306 | 2.29E-01 | 2.88E-01 |
| SLC22A23   | -0.35226 | 1.72E-16 | 1.45E-15 |
| SLC22A24   | 0.025533 | 5.63E-01 | 6.24E-01 |
| SLC22A25   | -0.00113 | 9.80E-01 | 9.84E-01 |
| SLC22A2    | 0.076898 | 8.13E-02 | 1.14E-01 |
| SLC22A3    | -0.54625 | 2.14E-41 | 1.05E-39 |
| SLC22A4    | -0.07696 | 8.10E-02 | 1.14E-01 |
| SLC22A5    | -0.3107  | 5.47E-13 | 3.30E-12 |
| SLC22A6    | -0.006   | 8.92E-01 | 9.12E-01 |
| SLC22A7    | -0.01874 | 6.71E-01 | 7.22E-01 |
| SLC22A8    | -0.09137 | 3.82E-02 | 5.77E-02 |
| SLC22A9    | 0.001871 | 9.66E-01 | 9.74E-01 |
| SLC23A1    | -0.09811 | 2.60E-02 | 4.06E-02 |
| SLC23A2    | -0.10252 | 2.00E-02 | 3.20E-02 |
| SLC23A3    | -0.12576 | 4.26E-03 | 7.74E-03 |
| SLC24A1    | -0.18454 | 2.51E-05 | 6.36E-05 |
| SLC24A2    | 0.140414 | 1.40E-03 | 2.75E-03 |
| SLC24A3    | -0.23583 | 6.11E-08 | 2.13E-07 |
| SLC24A4    | -0.2931  | 1.16E-11 | 6.07E-11 |
| SLC24A5    | -0.14782 | 7.66E-04 | 1.57E-03 |
| SLC24A6    | -0.01191 | 7.87E-01 | 8.24E-01 |
| SLC25A10   | 0.292892 | 1.20E-11 | 6.28E-11 |
| SLC25A11   | 0.021524 | 6.26E-01 | 6.82E-01 |
| SLC25A12   | 0.071654 | 1.04E-01 | 1.43E-01 |
| SLC25A13   | 0.417845 | 3.52E-23 | 5.36E-22 |
| SLC25A14   | -0.04982 | 2.59E-01 | 3.20E-01 |
| SLC25A15   | 0.224365 | 2.68E-07 | 8.72E-07 |
| SLC25A16   | -0.25755 | 3.01E-09 | 1.22E-08 |
| SLC25A17   | 0.116252 | 8.27E-03 | 1.42E-02 |
| SLC25A18   | -0.01839 | 6.77E-01 | 7.28E-01 |
| SLC25A19   | 0.347141 | 4.96E-16 | 4.01E-15 |
| SLC25A1    | 0.062384 | 1.57E-01 | 2.06E-01 |
| SLC25A20   | -0.21842 | 5.58E-07 | 1.75E-06 |
| SLC25A21   | 0.271554 | 3.71E-10 | 1.67E-09 |
| SLC25A22   | 0.159286 | 2.84E-04 | 6.20E-04 |
| SLC25A23   | -0.41895 | 2.63E-23 | 4.06E-22 |
| SLC25A24   | 0.200005 | 4.78E-06 | 1.34E-05 |

|          |          |          |          |
|----------|----------|----------|----------|
| SLC25A25 | -0.01854 | 6.75E-01 | 7.26E-01 |
| SLC25A26 | -0.18003 | 3.97E-05 | 9.79E-05 |
| SLC25A27 | -0.37043 | 3.40E-18 | 3.37E-17 |
| SLC25A28 | -0.1759  | 5.98E-05 | 1.44E-04 |
| SLC25A29 | -0.27867 | 1.22E-10 | 5.76E-10 |
| SLC25A2  | -0.08549 | 5.25E-02 | 7.71E-02 |
| SLC25A30 | -0.3028  | 2.21E-12 | 1.26E-11 |
| SLC25A31 | 0.018012 | 6.83E-01 | 7.33E-01 |
| SLC25A32 | 0.302022 | 2.53E-12 | 1.43E-11 |
| SLC25A33 | 0.208244 | 1.87E-06 | 5.49E-06 |
| SLC25A34 | -0.2482  | 1.14E-08 | 4.31E-08 |
| SLC25A35 | -0.21325 | 1.04E-06 | 3.14E-06 |
| SLC25A36 | -0.12517 | 4.44E-03 | 8.04E-03 |
| SLC25A37 | -0.01923 | 6.63E-01 | 7.16E-01 |
| SLC25A38 | -0.31047 | 5.70E-13 | 3.43E-12 |
| SLC25A39 | 0.357364 | 5.86E-17 | 5.21E-16 |
| SLC25A3  | 0.274404 | 2.39E-10 | 1.10E-09 |
| SLC25A40 | 0.355167 | 9.33E-17 | 8.11E-16 |
| SLC25A41 | -0.10864 | 1.36E-02 | 2.26E-02 |
| SLC25A42 | -0.42797 | 2.37E-24 | 3.99E-23 |
| SLC25A43 | 0.154973 | 4.16E-04 | 8.84E-04 |
| SLC25A44 | -0.04813 | 2.76E-01 | 3.37E-01 |
| SLC25A45 | -0.21173 | 1.25E-06 | 3.73E-06 |
| SLC25A46 | -0.0153  | 7.29E-01 | 7.74E-01 |
| SLC25A4  | -0.34949 | 3.06E-16 | 2.52E-15 |
| SLC25A5  | 0.214098 | 9.40E-07 | 2.85E-06 |
| SLC25A6  | -0.10939 | 1.30E-02 | 2.16E-02 |
| SLC26A10 | 0.141144 | 1.32E-03 | 2.60E-03 |
| SLC26A11 | -0.14342 | 1.10E-03 | 2.19E-03 |
| SLC26A1  | -0.14832 | 7.34E-04 | 1.51E-03 |
| SLC26A2  | 0.074153 | 9.28E-02 | 1.29E-01 |
| SLC26A3  | -0.01365 | 7.57E-01 | 7.98E-01 |
| SLC26A4  | 0.02231  | 6.13E-01 | 6.70E-01 |
| SLC26A5  | -0.42429 | 6.39E-24 | 1.04E-22 |
| SLC26A6  | -0.05124 | 2.46E-01 | 3.06E-01 |
| SLC26A7  | -0.03902 | 3.77E-01 | 4.43E-01 |
| SLC26A8  | -0.24422 | 1.98E-08 | 7.29E-08 |
| SLC26A9  | -0.52557 | 6.49E-38 | 2.65E-36 |
| SLC27A1  | -0.56821 | 2.29E-45 | 1.35E-43 |
| SLC27A2  | 0.177634 | 5.04E-05 | 1.23E-04 |
| SLC27A3  | -0.46021 | 2.34E-28 | 5.35E-27 |
| SLC27A4  | 0.192289 | 1.11E-05 | 2.96E-05 |
| SLC27A5  | -0.0128  | 7.72E-01 | 8.10E-01 |
| SLC27A6  | -0.03239 | 4.63E-01 | 5.29E-01 |

|          |          |          |          |
|----------|----------|----------|----------|
| SLC28A1  | 0.151012 | 5.85E-04 | 1.22E-03 |
| SLC28A2  | -0.07288 | 9.85E-02 | 1.36E-01 |
| SLC28A3  | 0.022053 | 6.18E-01 | 6.74E-01 |
| SLC29A1  | -0.21184 | 1.23E-06 | 3.68E-06 |
| SLC29A2  | 0.079869 | 7.01E-02 | 1.00E-01 |
| SLC29A3  | -0.10912 | 1.32E-02 | 2.20E-02 |
| SLC29A4  | 0.130122 | 3.09E-03 | 5.75E-03 |
| SLC2A10  | 0.083925 | 5.70E-02 | 8.31E-02 |
| SLC2A11  | -0.3075  | 9.68E-13 | 5.70E-12 |
| SLC2A12  | 0.000625 | 9.89E-01 | 9.91E-01 |
| SLC2A13  | -0.14736 | 7.96E-04 | 1.62E-03 |
| SLC2A14  | 0.273855 | 2.60E-10 | 1.19E-09 |
| SLC2A1   | 0.6051   | 9.41E-53 | 6.79E-51 |
| SLC2A2   | 0.082712 | 6.07E-02 | 8.80E-02 |
| SLC2A3   | 0.218978 | 5.21E-07 | 1.64E-06 |
| SLC2A4RG | -0.00956 | 8.29E-01 | 8.59E-01 |
| SLC2A4   | -0.1989  | 5.41E-06 | 1.50E-05 |
| SLC2A5   | 0.329116 | 1.78E-14 | 1.24E-13 |
| SLC2A6   | 0.161447 | 2.34E-04 | 5.18E-04 |
| SLC2A7   | 0.155952 | 3.82E-04 | 8.17E-04 |
| SLC2A8   | -0.01727 | 6.96E-01 | 7.45E-01 |
| SLC2A9   | -0.06545 | 1.38E-01 | 1.84E-01 |
| SLC30A10 | 0.287311 | 3.03E-11 | 1.52E-10 |
| SLC30A1  | 0.089118 | 4.32E-02 | 6.46E-02 |
| SLC30A2  | 0.031539 | 4.75E-01 | 5.41E-01 |
| SLC30A3  | -0.17968 | 4.11E-05 | 1.01E-04 |
| SLC30A4  | 0.091376 | 3.82E-02 | 5.77E-02 |
| SLC30A5  | -0.05561 | 2.08E-01 | 2.63E-01 |
| SLC30A6  | 0.394019 | 1.42E-20 | 1.75E-19 |
| SLC30A7  | 0.196438 | 7.09E-06 | 1.94E-05 |
| SLC30A8  | -0.1029  | 1.95E-02 | 3.13E-02 |
| SLC30A9  | -0.04973 | 2.60E-01 | 3.21E-01 |
| SLC31A1  | 0.133595 | 2.38E-03 | 4.50E-03 |
| SLC31A2  | 0.041493 | 3.47E-01 | 4.13E-01 |
| SLC32A1  | 0.097743 | 2.65E-02 | 4.14E-02 |
| SLC33A1  | 0.272714 | 3.10E-10 | 1.41E-09 |
| SLC34A1  | 0.087976 | 4.60E-02 | 6.84E-02 |
| SLC34A2  | -0.40689 | 5.90E-22 | 8.10E-21 |
| SLC34A3  | -0.00987 | 8.23E-01 | 8.54E-01 |
| SLC35A1  | -0.24412 | 2.01E-08 | 7.38E-08 |
| SLC35A2  | 0.245123 | 1.75E-08 | 6.47E-08 |
| SLC35A3  | 0.125199 | 4.43E-03 | 8.03E-03 |
| SLC35A4  | -0.31018 | 6.01E-13 | 3.61E-12 |
| SLC35A5  | -0.09235 | 3.62E-02 | 5.49E-02 |

|          |          |          |          |
|----------|----------|----------|----------|
| SLC35B1  | 0.193838 | 9.41E-06 | 2.53E-05 |
| SLC35B2  | 0.188724 | 1.62E-05 | 4.23E-05 |
| SLC35B3  | -0.01466 | 7.40E-01 | 7.84E-01 |
| SLC35B4  | 0.161103 | 2.41E-04 | 5.33E-04 |
| SLC35C1  | -0.06774 | 1.25E-01 | 1.68E-01 |
| SLC35C2  | -0.00987 | 8.23E-01 | 8.54E-01 |
| SLC35D1  | 0.020361 | 6.45E-01 | 6.99E-01 |
| SLC35D2  | -0.004   | 9.28E-01 | 9.43E-01 |
| SLC35D3  | 0.190908 | 1.29E-05 | 3.40E-05 |
| SLC35E1  | -0.17311 | 7.85E-05 | 1.86E-04 |
| SLC35E2  | -0.34773 | 4.40E-16 | 3.57E-15 |
| SLC35E3  | 0.214288 | 9.19E-07 | 2.79E-06 |
| SLC35E4  | 0.104632 | 1.75E-02 | 2.84E-02 |
| SLC35F1  | 0.05917  | 1.80E-01 | 2.33E-01 |
| SLC35F2  | 0.151632 | 5.55E-04 | 1.16E-03 |
| SLC35F3  | -0.14784 | 7.64E-04 | 1.56E-03 |
| SLC35F4  | 0.061398 | 1.64E-01 | 2.14E-01 |
| SLC35F5  | 0.212134 | 1.19E-06 | 3.56E-06 |
| SLC36A1  | 0.135802 | 2.01E-03 | 3.85E-03 |
| SLC36A2  | 0.025649 | 5.61E-01 | 6.22E-01 |
| SLC36A3  | -0.10945 | 1.29E-02 | 2.15E-02 |
| SLC36A4  | 0.307713 | 9.32E-13 | 5.49E-12 |
| SLC37A1  | -0.01133 | 7.98E-01 | 8.33E-01 |
| SLC37A2  | -0.0745  | 9.12E-02 | 1.27E-01 |
| SLC37A3  | 0.289072 | 2.27E-11 | 1.15E-10 |
| SLC37A4  | 0.01445  | 7.44E-01 | 7.87E-01 |
| SLC38A10 | -0.29215 | 1.36E-11 | 7.07E-11 |
| SLC38A11 | 0.021041 | 6.34E-01 | 6.89E-01 |
| SLC38A1  | 0.394028 | 1.42E-20 | 1.74E-19 |
| SLC38A2  | 0.230363 | 1.25E-07 | 4.22E-07 |
| SLC38A3  | 0.021895 | 6.20E-01 | 6.76E-01 |
| SLC38A4  | 0.013086 | 7.67E-01 | 8.06E-01 |
| SLC38A5  | -0.09168 | 3.75E-02 | 5.68E-02 |
| SLC38A6  | -0.04324 | 3.27E-01 | 3.93E-01 |
| SLC38A7  | 0.335223 | 5.44E-15 | 3.98E-14 |
| SLC38A8  | 0.076557 | 8.26E-02 | 1.16E-01 |
| SLC38A9  | 0.123356 | 5.06E-03 | 9.08E-03 |
| SLC39A10 | 0.159455 | 2.80E-04 | 6.12E-04 |
| SLC39A11 | 0.037291 | 3.98E-01 | 4.65E-01 |
| SLC39A12 | 0.013728 | 7.56E-01 | 7.97E-01 |
| SLC39A13 | -0.25699 | 3.27E-09 | 1.32E-08 |
| SLC39A14 | 0.392879 | 1.87E-20 | 2.27E-19 |
| SLC39A1  | 0.14044  | 1.40E-03 | 2.74E-03 |
| SLC39A2  | 0.080249 | 6.88E-02 | 9.87E-02 |

|          |          |          |          |
|----------|----------|----------|----------|
| SLC39A3  | 0.066052 | 1.34E-01 | 1.79E-01 |
| SLC39A4  | -0.0771  | 8.05E-02 | 1.13E-01 |
| SLC39A5  | 0.100018 | 2.32E-02 | 3.67E-02 |
| SLC39A6  | 0.152979 | 4.94E-04 | 1.04E-03 |
| SLC39A7  | 0.015801 | 7.21E-01 | 7.67E-01 |
| SLC39A8  | -0.31439 | 2.81E-13 | 1.75E-12 |
| SLC39A9  | 0.03069  | 4.87E-01 | 5.52E-01 |
| SLC3A1   | -0.01048 | 8.12E-01 | 8.45E-01 |
| SLC3A2   | 0.254706 | 4.54E-09 | 1.80E-08 |
| SLC40A1  | -0.247   | 1.35E-08 | 5.05E-08 |
| SLC41A1  | -0.51019 | 1.78E-35 | 6.29E-34 |
| SLC41A2  | 0.084321 | 5.58E-02 | 8.15E-02 |
| SLC41A3  | -0.22331 | 3.05E-07 | 9.88E-07 |
| SLC43A1  | -0.17207 | 8.68E-05 | 2.04E-04 |
| SLC43A2  | -0.30092 | 3.07E-12 | 1.71E-11 |
| SLC43A3  | -0.04426 | 3.16E-01 | 3.81E-01 |
| SLC44A1  | 0.310941 | 5.24E-13 | 3.17E-12 |
| SLC44A2  | -0.34355 | 1.03E-15 | 8.07E-15 |
| SLC44A3  | -0.32906 | 1.80E-14 | 1.25E-13 |
| SLC44A4  | -0.4021  | 1.96E-21 | 2.58E-20 |
| SLC44A5  | -0.08186 | 6.34E-02 | 9.17E-02 |
| SLC45A1  | 0.127578 | 3.73E-03 | 6.84E-03 |
| SLC45A2  | 0.103276 | 1.91E-02 | 3.07E-02 |
| SLC45A3  | 0.017578 | 6.91E-01 | 7.40E-01 |
| SLC45A4  | -0.08145 | 6.48E-02 | 9.34E-02 |
| SLC46A1  | -0.25291 | 5.87E-09 | 2.30E-08 |
| SLC46A2  | -0.44958 | 5.45E-27 | 1.12E-25 |
| SLC46A3  | -0.30697 | 1.06E-12 | 6.22E-12 |
| SLC47A1  | -0.38784 | 6.23E-20 | 7.23E-19 |
| SLC47A2  | -0.03569 | 4.19E-01 | 4.85E-01 |
| SLC48A1  | -0.26934 | 5.21E-10 | 2.30E-09 |
| SLC4A10  | 0.153996 | 4.53E-04 | 9.57E-04 |
| SLC4A11  | 0.085932 | 5.13E-02 | 7.55E-02 |
| SLC4A1AP | 0.447451 | 1.01E-26 | 2.05E-25 |
| SLC4A1   | -0.02768 | 5.31E-01 | 5.94E-01 |
| SLC4A2   | -0.06508 | 1.40E-01 | 1.86E-01 |
| SLC4A3   | -0.0093  | 8.33E-01 | 8.63E-01 |
| SLC4A4   | -0.34464 | 8.27E-16 | 6.55E-15 |
| SLC4A5   | -0.07591 | 8.53E-02 | 1.20E-01 |
| SLC4A7   | 0.183599 | 2.76E-05 | 6.96E-05 |
| SLC4A8   | -0.05951 | 1.78E-01 | 2.30E-01 |
| SLC4A9   | -0.03686 | 4.04E-01 | 4.70E-01 |
| SLC5A10  | 0.189987 | 1.42E-05 | 3.72E-05 |
| SLC5A11  | 0.224544 | 2.62E-07 | 8.54E-07 |



|          |          |          |          |
|----------|----------|----------|----------|
| SLC5A12  | 0.191862 | 1.16E-05 | 3.09E-05 |
| SLC5A1   | -0.08701 | 4.84E-02 | 7.16E-02 |
| SLC5A2   | -0.44275 | 3.90E-26 | 7.58E-25 |
| SLC5A3   | 0.101053 | 2.18E-02 | 3.47E-02 |
| SLC5A4   | -0.32993 | 1.53E-14 | 1.06E-13 |
| SLC5A5   | 0.101936 | 2.07E-02 | 3.30E-02 |
| SLC5A6   | 0.433634 | 5.03E-25 | 8.88E-24 |
| SLC5A7   | -0.19913 | 5.27E-06 | 1.47E-05 |
| SLC5A8   | -0.02724 | 5.37E-01 | 6.00E-01 |
| SLC5A9   | -0.41822 | 3.19E-23 | 4.87E-22 |
| SLC6A10P | 0.237601 | 4.84E-08 | 1.70E-07 |
| SLC6A11  | -0.00081 | 9.85E-01 | 9.89E-01 |
| SLC6A12  | -0.15458 | 4.31E-04 | 9.13E-04 |
| SLC6A13  | -0.22899 | 1.49E-07 | 5.00E-07 |
| SLC6A14  | -0.02133 | 6.29E-01 | 6.85E-01 |
| SLC6A15  | 0.369318 | 4.35E-18 | 4.27E-17 |
| SLC6A16  | -0.29559 | 7.63E-12 | 4.07E-11 |
| SLC6A17  | 0.349452 | 3.08E-16 | 2.54E-15 |
| SLC6A18  | -0.22471 | 2.56E-07 | 8.37E-07 |
| SLC6A19  | 0.023393 | 5.96E-01 | 6.54E-01 |
| SLC6A1   | -0.2663  | 8.26E-10 | 3.57E-09 |
| SLC6A20  | -0.14408 | 1.04E-03 | 2.09E-03 |
| SLC6A2   | -0.00591 | 8.94E-01 | 9.14E-01 |
| SLC6A3   | -0.05455 | 2.17E-01 | 2.73E-01 |
| SLC6A4   | -0.24074 | 3.17E-08 | 1.14E-07 |
| SLC6A5   | 0.022176 | 6.16E-01 | 6.72E-01 |
| SLC6A6   | -0.15063 | 6.05E-04 | 1.26E-03 |
| SLC6A7   | -0.07286 | 9.86E-02 | 1.36E-01 |
| SLC6A8   | 0.250203 | 8.61E-09 | 3.31E-08 |
| SLC6A9   | -0.18321 | 2.88E-05 | 7.23E-05 |
| SLC7A10  | -0.23807 | 4.54E-08 | 1.61E-07 |
| SLC7A11  | 0.217494 | 6.24E-07 | 1.94E-06 |
| SLC7A13  | -0.00618 | 8.89E-01 | 9.10E-01 |
| SLC7A14  | 0.005571 | 9.00E-01 | 9.19E-01 |
| SLC7A1   | 0.357062 | 6.24E-17 | 5.53E-16 |
| SLC7A2   | -0.11663 | 8.06E-03 | 1.39E-02 |
| SLC7A3   | 0.083061 | 5.96E-02 | 8.66E-02 |
| SLC7A4   | -0.1763  | 5.75E-05 | 1.39E-04 |
| SLC7A5P1 | 0.148663 | 7.14E-04 | 1.47E-03 |
| SLC7A5P2 | 0.099545 | 2.39E-02 | 3.76E-02 |
| SLC7A5   | 0.450581 | 4.08E-27 | 8.49E-26 |
| SLC7A6OS | 0.189089 | 1.56E-05 | 4.08E-05 |
| SLC7A6   | -0.15491 | 4.18E-04 | 8.88E-04 |
| SLC7A7   | 0.077484 | 7.90E-02 | 1.12E-01 |

|          |          |          |          |
|----------|----------|----------|----------|
| SLC7A8   | -0.39759 | 5.95E-21 | 7.54E-20 |
| SLC7A9   | 0.073044 | 9.78E-02 | 1.35E-01 |
| SLC8A1   | -0.0542  | 2.19E-01 | 2.77E-01 |
| SLC8A2   | 0.009064 | 8.37E-01 | 8.66E-01 |
| SLC8A3   | -0.38431 | 1.43E-19 | 1.61E-18 |
| SLC9A10  | -0.02016 | 6.48E-01 | 7.02E-01 |
| SLC9A11  | -0.2943  | 9.50E-12 | 5.02E-11 |
| SLC9A1   | -0.16522 | 1.66E-04 | 3.74E-04 |
| SLC9A2   | -0.02298 | 6.03E-01 | 6.60E-01 |
| SLC9A3R1 | 0.13971  | 1.48E-03 | 2.90E-03 |
| SLC9A3R2 | -0.41671 | 4.74E-23 | 7.12E-22 |
| SLC9A3   | -0.08272 | 6.07E-02 | 8.80E-02 |
| SLC9A4   | -0.02683 | 5.44E-01 | 6.06E-01 |
| SLC9A5   | -0.22865 | 1.55E-07 | 5.20E-07 |
| SLC9A6   | -0.0122  | 7.82E-01 | 8.20E-01 |
| SLC9A7   | 0.268386 | 6.03E-10 | 2.64E-09 |
| SLC9A8   | -0.27089 | 4.11E-10 | 1.84E-09 |
| SLC9A9   | -0.22125 | 3.94E-07 | 1.26E-06 |
| SLCO1A2  | 0.079986 | 6.97E-02 | 9.99E-02 |
| SLCO1B1  | 0.187381 | 1.87E-05 | 4.83E-05 |
| SLCO1B3  | 0.01526  | 7.30E-01 | 7.75E-01 |
| SLCO1C1  | -0.2312  | 1.12E-07 | 3.81E-07 |
| SLCO2A1  | -0.24934 | 9.72E-09 | 3.71E-08 |
| SLCO2B1  | -0.15169 | 5.52E-04 | 1.15E-03 |
| SLCO3A1  | -0.25745 | 3.06E-09 | 1.24E-08 |
| SLCO4A1  | 0.190493 | 1.35E-05 | 3.54E-05 |
| SLCO4C1  | -0.20791 | 1.95E-06 | 5.69E-06 |
| SLCO5A1  | 0.183057 | 2.92E-05 | 7.33E-05 |
| SLCO6A1  | 0.012195 | 7.82E-01 | 8.20E-01 |
| SLED1    | -0.03289 | 4.56E-01 | 5.23E-01 |
| SLFN11   | 0.225773 | 2.24E-07 | 7.37E-07 |
| SLFN12L  | -0.01299 | 7.69E-01 | 8.08E-01 |
| SLFN12   | -0.1232  | 5.12E-03 | 9.17E-03 |
| SLFN13   | 0.209765 | 1.57E-06 | 4.64E-06 |
| SLFN14   | -0.23432 | 7.46E-08 | 2.58E-07 |
| SLFN5    | -0.00736 | 8.68E-01 | 8.92E-01 |
| SLFNL1   | -0.52398 | 1.17E-37 | 4.66E-36 |
| SLIT1    | -0.02263 | 6.08E-01 | 6.65E-01 |
| SLIT2    | -0.30333 | 2.02E-12 | 1.15E-11 |
| SLIT3    | -0.39323 | 1.72E-20 | 2.09E-19 |
| SLITRK1  | 0.152366 | 5.21E-04 | 1.09E-03 |
| SLITRK2  | -0.09311 | 3.46E-02 | 5.28E-02 |
| SLITRK3  | -0.16063 | 2.52E-04 | 5.54E-04 |
| SLITRK4  | 0.155608 | 3.94E-04 | 8.40E-04 |

|          |          |          |          |
|----------|----------|----------|----------|
| SLITRK5  | 0.082352 | 6.18E-02 | 8.95E-02 |
| SLITRK6  | -0.05708 | 1.96E-01 | 2.50E-01 |
| SLK      | 0.033187 | 4.52E-01 | 5.19E-01 |
| SLMAP    | 0.024135 | 5.85E-01 | 6.44E-01 |
| SLMO1    | 0.217412 | 6.31E-07 | 1.96E-06 |
| SLMO2    | 0.332829 | 8.70E-15 | 6.21E-14 |
| SLN      | -0.08647 | 4.99E-02 | 7.36E-02 |
| SLPI     | -0.36557 | 9.96E-18 | 9.47E-17 |
| SLTM     | -0.17604 | 5.90E-05 | 1.42E-04 |
| SLU7     | -0.22115 | 3.99E-07 | 1.27E-06 |
| SLURP1   | 0.062132 | 1.59E-01 | 2.08E-01 |
| SMAD1    | 0.038414 | 3.84E-01 | 4.51E-01 |
| SMAD2    | -0.06024 | 1.72E-01 | 2.24E-01 |
| SMAD3    | 0.039383 | 3.72E-01 | 4.39E-01 |
| SMAD4    | -0.14964 | 6.57E-04 | 1.36E-03 |
| SMAD5OS  | -0.10978 | 1.27E-02 | 2.11E-02 |
| SMAD5    | 0.006112 | 8.90E-01 | 9.11E-01 |
| SMAD6    | -0.51033 | 1.69E-35 | 6.00E-34 |
| SMAD7    | -0.34211 | 1.38E-15 | 1.06E-14 |
| SMAD9    | -0.19219 | 1.12E-05 | 2.99E-05 |
| SMAGP    | 0.260517 | 1.95E-09 | 8.08E-09 |
| SMAP1    | 0.137867 | 1.71E-03 | 3.32E-03 |
| SMAP2    | -0.23892 | 4.05E-08 | 1.44E-07 |
| SMARCA1  | -0.00625 | 8.87E-01 | 9.09E-01 |
| SMARCA2  | -0.43268 | 6.55E-25 | 1.14E-23 |
| SMARCA4  | -0.09681 | 2.80E-02 | 4.35E-02 |
| SMARCA5  | 0.202013 | 3.82E-06 | 1.08E-05 |
| SMARCAD1 | 0.198139 | 5.88E-06 | 1.62E-05 |
| SMARCAL1 | 0.322329 | 6.48E-14 | 4.28E-13 |
| SMARCB1  | 0.258313 | 2.70E-09 | 1.10E-08 |
| SMARCC1  | 0.122801 | 5.26E-03 | 9.40E-03 |
| SMARCC2  | 0.012897 | 7.70E-01 | 8.09E-01 |
| SMARCD1  | 0.265893 | 8.78E-10 | 3.78E-09 |
| SMARCD2  | 0.107821 | 1.44E-02 | 2.37E-02 |
| SMARCD3  | -0.37156 | 2.64E-18 | 2.65E-17 |
| SMARCE1  | 0.213587 | 9.99E-07 | 3.02E-06 |
| SMC1A    | 0.339064 | 2.54E-15 | 1.91E-14 |
| SMC1B    | 0.267827 | 6.56E-10 | 2.87E-09 |
| SMC2     | 0.637771 | 3.77E-60 | 3.26E-58 |
| SMC3     | 0.321091 | 8.16E-14 | 5.34E-13 |
| SMC4     | 0.49083  | 1.41E-32 | 4.22E-31 |
| SMC5     | -0.09981 | 2.35E-02 | 3.71E-02 |
| SMC6     | 0.466365 | 3.58E-29 | 8.72E-28 |
| SMCHD1   | 0.213732 | 9.82E-07 | 2.97E-06 |

|         |          |          |          |
|---------|----------|----------|----------|
| SMCP    | 0.072073 | 1.02E-01 | 1.40E-01 |
| SMCR5   | -0.2199  | 4.66E-07 | 1.47E-06 |
| SMCR7L  | 0.144996 | 9.67E-04 | 1.95E-03 |
| SMCR7   | -0.32795 | 2.23E-14 | 1.54E-13 |
| SMCR8   | -0.07903 | 7.31E-02 | 1.04E-01 |
| SMEK1   | 0.018369 | 6.77E-01 | 7.28E-01 |
| SMEK2   | 0.250967 | 7.73E-09 | 2.99E-08 |
| SMEK3P  | 0.174035 | 7.18E-05 | 1.71E-04 |
| SMG1    | -0.08058 | 6.77E-02 | 9.73E-02 |
| SMG5    | 0.18673  | 2.00E-05 | 5.14E-05 |
| SMG6    | -0.35579 | 8.17E-17 | 7.13E-16 |
| SMG7    | 0.077214 | 8.00E-02 | 1.13E-01 |
| SMN1    | 0.128397 | 3.51E-03 | 6.47E-03 |
| SMN2    | 0.301882 | 2.60E-12 | 1.46E-11 |
| SMNDC1  | 0.422183 | 1.12E-23 | 1.78E-22 |
| SMOC1   | -0.03551 | 4.21E-01 | 4.87E-01 |
| SMOC2   | -0.26014 | 2.06E-09 | 8.50E-09 |
| SMOX    | 0.278991 | 1.16E-10 | 5.48E-10 |
| SMO     | 0.166871 | 1.42E-04 | 3.24E-04 |
| SMPD1   | -0.31771 | 1.53E-13 | 9.74E-13 |
| SMPD2   | -0.1147  | 9.18E-03 | 1.57E-02 |
| SMPD3   | -0.31057 | 5.60E-13 | 3.38E-12 |
| SMPD4   | 0.294595 | 9.03E-12 | 4.79E-11 |
| SMPDL3A | 0.044397 | 3.15E-01 | 3.79E-01 |
| SMPDL3B | -0.28797 | 2.72E-11 | 1.37E-10 |
| SMPX    | -0.03204 | 4.68E-01 | 5.34E-01 |
| SMR3A   | -0.13853 | 1.62E-03 | 3.15E-03 |
| SMR3B   | -0.09054 | 4.00E-02 | 6.02E-02 |
| SMS     | 0.49237  | 8.40E-33 | 2.56E-31 |
| SMTNL1  | 0.202082 | 3.79E-06 | 1.07E-05 |
| SMTNL2  | -0.18871 | 1.63E-05 | 4.23E-05 |
| SMTN    | 0.11664  | 8.06E-03 | 1.39E-02 |
| SMU1    | 0.205024 | 2.71E-06 | 7.80E-06 |
| SMUG1   | 0.261843 | 1.61E-09 | 6.70E-09 |
| SMURF1  | -0.06265 | 1.56E-01 | 2.04E-01 |
| SMURF2  | 0.031485 | 4.76E-01 | 5.41E-01 |
| SMYD1   | 0.162468 | 2.13E-04 | 4.75E-04 |
| SMYD2   | 0.03428  | 4.38E-01 | 5.04E-01 |
| SMYD3   | -0.13942 | 1.52E-03 | 2.96E-03 |
| SMYD4   | -0.30027 | 3.43E-12 | 1.91E-11 |
| SMYD5   | 0.243263 | 2.25E-08 | 8.25E-08 |
| SNAI1   | 0.368482 | 5.24E-18 | 5.08E-17 |
| SNAI2   | 0.168137 | 1.26E-04 | 2.90E-04 |
| SNAI3   | -0.29634 | 6.72E-12 | 3.61E-11 |

|            |          |          |          |
|------------|----------|----------|----------|
| SNAP23     | 0.001074 | 9.81E-01 | 9.85E-01 |
| SNAP25     | 0.098679 | 2.51E-02 | 3.94E-02 |
| SNAP29     | 0.011087 | 8.02E-01 | 8.37E-01 |
| SNAP47     | -0.00702 | 8.74E-01 | 8.97E-01 |
| SNAP91     | 0.116559 | 8.10E-03 | 1.40E-02 |
| SNAPC1     | 0.343381 | 1.07E-15 | 8.32E-15 |
| SNAPC2     | -0.04191 | 3.42E-01 | 4.08E-01 |
| SNAPC3     | 0.150954 | 5.88E-04 | 1.22E-03 |
| SNAPC4     | -0.11937 | 6.69E-03 | 1.17E-02 |
| SNAPC5     | 0.162967 | 2.04E-04 | 4.55E-04 |
| SNAPIN     | 0.079504 | 7.14E-02 | 1.02E-01 |
| SNAR-B2    | 0.07559  | 8.66E-02 | 1.21E-01 |
| SNAR-G1    | 0.1398   | 1.47E-03 | 2.88E-03 |
| SNCAIP     | -0.06464 | 1.43E-01 | 1.89E-01 |
| SNCA       | -0.03144 | 4.76E-01 | 5.42E-01 |
| SNCB       | 0.168573 | 1.21E-04 | 2.79E-04 |
| SNCG       | 0.196791 | 6.82E-06 | 1.87E-05 |
| SND1       | 0.184046 | 2.64E-05 | 6.67E-05 |
| SNED1      | -0.59407 | 1.92E-50 | 1.31E-48 |
| SNF8       | 0.473236 | 4.22E-30 | 1.09E-28 |
| SNHG10     | 0.057242 | 1.95E-01 | 2.49E-01 |
| SNHG11     | -0.07764 | 7.84E-02 | 1.11E-01 |
| SNHG12     | -0.13285 | 2.52E-03 | 4.74E-03 |
| SNHG1      | 0.272951 | 2.99E-10 | 1.36E-09 |
| SNHG3-RCC1 | 0.097153 | 2.75E-02 | 4.27E-02 |
| SNHG3      | -0.04425 | 3.16E-01 | 3.81E-01 |
| SNHG4      | 0.087513 | 4.71E-02 | 6.99E-02 |
| SNHG5      | -0.09141 | 3.81E-02 | 5.76E-02 |
| SNHG6      | 0.181748 | 3.34E-05 | 8.30E-05 |
| SNHG7      | -0.15476 | 4.24E-04 | 8.99E-04 |
| SNHG8      | -0.28529 | 4.22E-11 | 2.07E-10 |
| SNHG9      | -0.23825 | 4.44E-08 | 1.57E-07 |
| SNIP1      | 0.052256 | 2.36E-01 | 2.96E-01 |
| SNN        | -0.13678 | 1.86E-03 | 3.59E-03 |
| SNORA10    | 0.025508 | 5.64E-01 | 6.24E-01 |
| SNORA11D   | -0.03701 | 4.02E-01 | 4.68E-01 |
| SNORA11E   | -0.04534 | 3.04E-01 | 3.68E-01 |
| SNORA11    | 0.057708 | 1.91E-01 | 2.45E-01 |
| SNORA12    | 0.067147 | 1.28E-01 | 1.72E-01 |
| SNORA13    | -0.02148 | 6.27E-01 | 6.83E-01 |
| SNORA14A   | 0.064336 | 1.45E-01 | 1.92E-01 |
| SNORA14B   | 0.018206 | 6.80E-01 | 7.31E-01 |
| SNORA15    | 0.084857 | 5.43E-02 | 7.95E-02 |
| SNORA16A   | -0.01755 | 6.91E-01 | 7.40E-01 |

|          |          |          |          |
|----------|----------|----------|----------|
| SNORA16B | -0.04279 | 3.32E-01 | 3.98E-01 |
| SNORA18  | 0.050794 | 2.50E-01 | 3.10E-01 |
| SNORA1   | -0.00518 | 9.07E-01 | 9.25E-01 |
| SNORA20  | 0.082519 | 6.13E-02 | 8.88E-02 |
| SNORA21  | 0.022507 | 6.10E-01 | 6.67E-01 |
| SNORA22  | -0.00076 | 9.86E-01 | 9.89E-01 |
| SNORA23  | 0.036241 | 4.12E-01 | 4.78E-01 |
| SNORA24  | -0.11527 | 8.84E-03 | 1.51E-02 |
| SNORA25  | 0.055982 | 2.05E-01 | 2.60E-01 |
| SNORA26  | 0.040762 | 3.56E-01 | 4.22E-01 |
| SNORA27  | 0.029825 | 4.99E-01 | 5.64E-01 |
| SNORA28  | -0.04233 | 3.38E-01 | 4.03E-01 |
| SNORA29  | 0.017335 | 6.95E-01 | 7.44E-01 |
| SNORA2A  | 0.05265  | 2.33E-01 | 2.91E-01 |
| SNORA2B  | -0.04911 | 2.66E-01 | 3.28E-01 |
| SNORA31  | 0.058191 | 1.87E-01 | 2.41E-01 |
| SNORA32  | 0.007093 | 8.72E-01 | 8.96E-01 |
| SNORA34  | -0.01292 | 7.70E-01 | 8.09E-01 |
| SNORA36A | -0.00404 | 9.27E-01 | 9.42E-01 |
| SNORA37  | -0.03341 | 4.49E-01 | 5.15E-01 |
| SNORA38B | 0.057363 | 1.94E-01 | 2.48E-01 |
| SNORA38  | -0.05074 | 2.50E-01 | 3.11E-01 |
| SNORA39  | -0.16671 | 1.44E-04 | 3.28E-04 |
| SNORA3   | 0.002763 | 9.50E-01 | 9.61E-01 |
| SNORA40  | 0.159007 | 2.91E-04 | 6.35E-04 |
| SNORA41  | 0.010351 | 8.15E-01 | 8.47E-01 |
| SNORA42  | 0.007211 | 8.70E-01 | 8.94E-01 |
| SNORA44  | 0.059092 | 1.81E-01 | 2.33E-01 |
| SNORA45  | -0.069   | 1.18E-01 | 1.59E-01 |
| SNORA46  | -0.01987 | 6.53E-01 | 7.06E-01 |
| SNORA47  | -0.01692 | 7.02E-01 | 7.50E-01 |
| SNORA48  | -0.04793 | 2.78E-01 | 3.40E-01 |
| SNORA49  | 0.005964 | 8.93E-01 | 9.13E-01 |
| SNORA4   | 0.036996 | 4.02E-01 | 4.68E-01 |
| SNORA50  | 0.01132  | 7.98E-01 | 8.33E-01 |
| SNORA51  | 0.11271  | 1.05E-02 | 1.77E-02 |
| SNORA52  | -0.02073 | 6.39E-01 | 6.93E-01 |
| SNORA53  | 0.086006 | 5.11E-02 | 7.52E-02 |
| SNORA54  | -0.0009  | 9.84E-01 | 9.87E-01 |
| SNORA55  | -0.05763 | 1.92E-01 | 2.46E-01 |
| SNORA56  | 0.053373 | 2.27E-01 | 2.84E-01 |
| SNORA57  | -0.03993 | 3.66E-01 | 4.32E-01 |
| SNORA58  | 0.062177 | 1.59E-01 | 2.08E-01 |
| SNORA59B | -0.0185  | 6.75E-01 | 7.26E-01 |

|             |          |          |          |
|-------------|----------|----------|----------|
| SNORA5A     | 0.09679  | 2.81E-02 | 4.36E-02 |
| SNORA5B     | -0.0157  | 7.22E-01 | 7.68E-01 |
| SNORA5C     | 0.022475 | 6.11E-01 | 6.68E-01 |
| SNORA61     | -0.0007  | 9.87E-01 | 9.90E-01 |
| SNORA62     | -0.08886 | 4.38E-02 | 6.54E-02 |
| SNORA63     | 0.007978 | 8.57E-01 | 8.83E-01 |
| SNORA64     | -0.01907 | 6.66E-01 | 7.17E-01 |
| SNORA65     | 0.074909 | 8.95E-02 | 1.25E-01 |
| SNORA66     | 0.011593 | 7.93E-01 | 8.29E-01 |
| SNORA67     | 0.076375 | 8.34E-02 | 1.17E-01 |
| SNORA68     | 0.00449  | 9.19E-01 | 9.35E-01 |
| SNORA6      | 0.058138 | 1.88E-01 | 2.41E-01 |
| SNORA70B    | -0.03123 | 4.79E-01 | 5.45E-01 |
| SNORA70     | 0.046665 | 2.91E-01 | 3.53E-01 |
| SNORA71A    | -0.01686 | 7.03E-01 | 7.51E-01 |
| SNORA71B    | 0.018969 | 6.68E-01 | 7.19E-01 |
| SNORA71C    | 0.128431 | 3.51E-03 | 6.45E-03 |
| SNORA71D    | 0.081258 | 6.54E-02 | 9.42E-02 |
| SNORA72     | -0.07732 | 7.96E-02 | 1.12E-01 |
| SNORA74A    | 0.056557 | 2.00E-01 | 2.55E-01 |
| SNORA74B    | 5.57E-05 | 9.99E-01 | 9.99E-01 |
| SNORA75     | 0.00703  | 8.74E-01 | 8.97E-01 |
| SNORA76     | 0.109234 | 1.31E-02 | 2.18E-02 |
| SNORA77     | -0.03803 | 3.89E-01 | 4.56E-01 |
| SNORA78     | 0.019504 | 6.59E-01 | 7.11E-01 |
| SNORA79     | 0.032779 | 4.58E-01 | 5.24E-01 |
| SNORA7B     | -0.15229 | 5.24E-04 | 1.10E-03 |
| SNORA80     | 0.033354 | 4.50E-01 | 5.16E-01 |
| SNORA81     | 0.016057 | 7.16E-01 | 7.63E-01 |
| SNORA84     | 0.036045 | 4.14E-01 | 4.81E-01 |
| SNORA8      | -0.01107 | 8.02E-01 | 8.37E-01 |
| SNORA9      | 0.009693 | 8.26E-01 | 8.57E-01 |
| SNORD10     | -0.09737 | 2.71E-02 | 4.23E-02 |
| SNORD115-26 | -0.04876 | 2.69E-01 | 3.31E-01 |
| SNORD116-20 | -0.25598 | 3.78E-09 | 1.51E-08 |
| SNORD116-28 | -0.24791 | 1.19E-08 | 4.48E-08 |
| SNORD116-4  | -0.12753 | 3.74E-03 | 6.86E-03 |
| SNORD15A    | 0.026264 | 5.52E-01 | 6.14E-01 |
| SNORD15B    | 0.050525 | 2.52E-01 | 3.13E-01 |
| SNORD17     | 0.129355 | 3.27E-03 | 6.06E-03 |
| SNORD1C     | 0.051726 | 2.41E-01 | 3.01E-01 |
| SNORD22     | 0.066263 | 1.33E-01 | 1.78E-01 |
| SNORD89     | 0.029869 | 4.99E-01 | 5.63E-01 |
| SNORD94     | -0.00047 | 9.91E-01 | 9.94E-01 |

|          |          |          |          |
|----------|----------|----------|----------|
| SNORD97  | -0.11508 | 8.95E-03 | 1.53E-02 |
| SNPH     | -0.13195 | 2.70E-03 | 5.06E-03 |
| SNRK     | -0.26739 | 7.00E-10 | 3.05E-09 |
| SNRNP200 | 0.200858 | 4.35E-06 | 1.22E-05 |
| SNRNP25  | 0.24154  | 2.85E-08 | 1.03E-07 |
| SNRNP27  | 0.452719 | 2.18E-27 | 4.65E-26 |
| SNRNP35  | -0.16784 | 1.30E-04 | 2.98E-04 |
| SNRNP40  | 0.370112 | 3.65E-18 | 3.60E-17 |
| SNRNP48  | 0.139583 | 1.50E-03 | 2.92E-03 |
| SNRNP70  | -0.14399 | 1.05E-03 | 2.10E-03 |
| SNRPA1   | 0.583098 | 3.10E-48 | 2.02E-46 |
| SNRPA    | 0.333375 | 7.82E-15 | 5.60E-14 |
| SNRPB2   | 0.293238 | 1.14E-11 | 5.95E-11 |
| SNRPB    | 0.42656  | 3.47E-24 | 5.77E-23 |
| SNRPC    | 0.364561 | 1.24E-17 | 1.17E-16 |
| SNRPD1   | 0.579419 | 1.64E-47 | 1.05E-45 |
| SNRPD2   | 0.361699 | 2.31E-17 | 2.14E-16 |
| SNRPD3   | 0.24462  | 1.87E-08 | 6.91E-08 |
| SNRPE    | 0.284691 | 4.65E-11 | 2.28E-10 |
| SNRPF    | 0.51619  | 2.06E-36 | 7.68E-35 |
| SNRPG    | 0.481966 | 2.59E-31 | 7.25E-30 |
| SNRPN    | -0.26126 | 1.75E-09 | 7.28E-09 |
| SNTA1    | 0.02414  | 5.85E-01 | 6.44E-01 |
| SNTB1    | -0.29546 | 7.80E-12 | 4.15E-11 |
| SNTB2    | -0.15082 | 5.95E-04 | 1.24E-03 |
| SNTG1    | 0.064112 | 1.46E-01 | 1.93E-01 |
| SNTG2    | -0.21288 | 1.09E-06 | 3.27E-06 |
| SNTN     | -0.41461 | 8.18E-23 | 1.20E-21 |
| SNUPN    | 0.104579 | 1.76E-02 | 2.85E-02 |
| SNURF    | -0.07432 | 9.20E-02 | 1.28E-01 |
| SNW1     | 0.334049 | 6.85E-15 | 4.95E-14 |
| SNX10    | 0.252472 | 6.25E-09 | 2.44E-08 |
| SNX11    | 0.219258 | 5.04E-07 | 1.59E-06 |
| SNX12    | 0.19529  | 8.04E-06 | 2.18E-05 |
| SNX13    | -0.08685 | 4.89E-02 | 7.22E-02 |
| SNX14    | 0.004295 | 9.23E-01 | 9.38E-01 |
| SNX15    | 0.108461 | 1.38E-02 | 2.28E-02 |
| SNX16    | 0.139093 | 1.55E-03 | 3.03E-03 |
| SNX17    | 0.224991 | 2.47E-07 | 8.09E-07 |
| SNX18    | -0.27495 | 2.19E-10 | 1.01E-09 |
| SNX19    | -0.1331  | 2.47E-03 | 4.66E-03 |
| SNX1     | -0.48378 | 1.44E-31 | 4.08E-30 |
| SNX20    | -0.16127 | 2.38E-04 | 5.25E-04 |
| SNX21    | -0.06573 | 1.36E-01 | 1.82E-01 |



|        |          |          |          |
|--------|----------|----------|----------|
| SNX22  | -0.26628 | 8.28E-10 | 3.58E-09 |
| SNX24  | -0.1375  | 1.76E-03 | 3.41E-03 |
| SNX25  | -0.46663 | 3.30E-29 | 8.04E-28 |
| SNX27  | -0.01514 | 7.32E-01 | 7.76E-01 |
| SNX29  | -0.46907 | 1.55E-29 | 3.88E-28 |
| SNX2   | -0.07389 | 9.39E-02 | 1.30E-01 |
| SNX30  | -0.53389 | 2.76E-39 | 1.23E-37 |
| SNX31  | -0.07813 | 7.65E-02 | 1.09E-01 |
| SNX32  | 0.024475 | 5.79E-01 | 6.39E-01 |
| SNX33  | -0.37387 | 1.57E-18 | 1.61E-17 |
| SNX3   | 0.180555 | 3.77E-05 | 9.31E-05 |
| SNX4   | 0.173305 | 7.71E-05 | 1.83E-04 |
| SNX5   | -0.06903 | 1.18E-01 | 1.59E-01 |
| SNX6   | 0.372366 | 2.20E-18 | 2.23E-17 |
| SNX7   | 0.302579 | 2.30E-12 | 1.31E-11 |
| SNX8   | 0.316152 | 2.04E-13 | 1.28E-12 |
| SNX9   | 0.140523 | 1.39E-03 | 2.73E-03 |
| SOAT1  | 0.117788 | 7.45E-03 | 1.29E-02 |
| SOAT2  | -0.10783 | 1.44E-02 | 2.37E-02 |
| SOBP   | -0.19012 | 1.40E-05 | 3.67E-05 |
| SOCS1  | -0.05582 | 2.06E-01 | 2.62E-01 |
| SOCS2  | -0.19646 | 7.07E-06 | 1.93E-05 |
| SOCS3  | 0.076551 | 8.26E-02 | 1.16E-01 |
| SOCS4  | 0.222897 | 3.21E-07 | 1.04E-06 |
| SOCS5  | -0.14572 | 9.12E-04 | 1.84E-03 |
| SOCS6  | 0.015145 | 7.32E-01 | 7.76E-01 |
| SOCS7  | 0.013308 | 7.63E-01 | 8.03E-01 |
| SOD1   | 0.093134 | 3.46E-02 | 5.27E-02 |
| SOD2   | 0.196812 | 6.81E-06 | 1.86E-05 |
| SOD3   | -0.35688 | 6.49E-17 | 5.73E-16 |
| SOHLH1 | 0.241819 | 2.74E-08 | 9.95E-08 |
| SOHLH2 | 0.095073 | 3.10E-02 | 4.77E-02 |
| SOLH   | -0.06646 | 1.32E-01 | 1.77E-01 |
| SON    | -0.17367 | 7.44E-05 | 1.77E-04 |
| SORBS1 | -0.38067 | 3.33E-19 | 3.61E-18 |
| SORBS2 | -0.41626 | 5.33E-23 | 7.99E-22 |
| SORBS3 | -0.28696 | 3.21E-11 | 1.60E-10 |
| SORCS1 | -0.32545 | 3.60E-14 | 2.43E-13 |
| SORCS2 | -0.45874 | 3.64E-28 | 8.19E-27 |
| SORCS3 | -0.12806 | 3.60E-03 | 6.61E-03 |
| SORD   | 0.17531  | 6.34E-05 | 1.52E-04 |
| SORL1  | -0.19247 | 1.09E-05 | 2.90E-05 |
| SORT1  | -0.27764 | 1.44E-10 | 6.74E-10 |
| SOS1   | 0.08754  | 4.71E-02 | 6.98E-02 |

|         |          |          |          |
|---------|----------|----------|----------|
| SOS2    | -0.13462 | 2.20E-03 | 4.18E-03 |
| SOSTDC1 | -0.3894  | 4.31E-20 | 5.07E-19 |
| SOST    | 0.104121 | 1.81E-02 | 2.93E-02 |
| SOX10   | -0.25132 | 7.36E-09 | 2.85E-08 |
| SOX11   | 0.035299 | 4.24E-01 | 4.90E-01 |
| SOX12   | 0.087354 | 4.76E-02 | 7.04E-02 |
| SOX13   | -0.40197 | 2.02E-21 | 2.66E-20 |
| SOX14   | -0.15521 | 4.08E-04 | 8.67E-04 |
| SOX15   | 0.162846 | 2.06E-04 | 4.60E-04 |
| SOX17   | -0.25289 | 5.89E-09 | 2.31E-08 |
| SOX18   | -0.24726 | 1.30E-08 | 4.89E-08 |
| SOX1    | -0.18613 | 2.13E-05 | 5.45E-05 |
| SOX21   | 0.201261 | 4.16E-06 | 1.17E-05 |
| SOX20T  | 0.075163 | 8.84E-02 | 1.23E-01 |
| SOX2    | 0.039904 | 3.66E-01 | 4.32E-01 |
| SOX30   | 0.160294 | 2.60E-04 | 5.70E-04 |
| SOX3    | -0.07223 | 1.02E-01 | 1.40E-01 |
| SOX4    | 0.118233 | 7.23E-03 | 1.26E-02 |
| SOX5    | -0.15614 | 3.76E-04 | 8.05E-04 |
| SOX6    | -0.34413 | 9.18E-16 | 7.23E-15 |
| SOX7    | -0.21851 | 5.52E-07 | 1.73E-06 |
| SOX8    | -0.33626 | 4.44E-15 | 3.27E-14 |
| SOX9    | -0.01954 | 6.58E-01 | 7.11E-01 |
| SP100   | -0.02796 | 5.27E-01 | 5.90E-01 |
| SP110   | 0.035584 | 4.20E-01 | 4.87E-01 |
| SP140L  | 0.191452 | 1.22E-05 | 3.22E-05 |
| SP140   | -0.00044 | 9.92E-01 | 9.94E-01 |
| SP1     | 0.023521 | 5.94E-01 | 6.52E-01 |
| SP2     | -0.13571 | 2.02E-03 | 3.88E-03 |
| SP3     | 0.231246 | 1.11E-07 | 3.79E-07 |
| SP4     | -0.00164 | 9.70E-01 | 9.77E-01 |
| SP5     | 0.027214 | 5.38E-01 | 6.00E-01 |
| SP6     | 0.35251  | 1.63E-16 | 1.38E-15 |
| SP7     | -0.00836 | 8.50E-01 | 8.77E-01 |
| SP8     | 0.32053  | 9.06E-14 | 5.90E-13 |
| SP9     | 0.286841 | 3.28E-11 | 1.63E-10 |
| SPA17   | -0.14387 | 1.06E-03 | 2.12E-03 |
| SPACA1  | 0.014856 | 7.37E-01 | 7.81E-01 |
| SPACA3  | -0.02661 | 5.47E-01 | 6.09E-01 |
| SPACA4  | -0.37441 | 1.39E-18 | 1.43E-17 |
| SPACA5  | -0.15948 | 2.79E-04 | 6.11E-04 |
| SPAG11A | 0.103292 | 1.90E-02 | 3.06E-02 |
| SPAG11B | 0.07016  | 1.12E-01 | 1.52E-01 |
| SPAG16  | 0.135486 | 2.06E-03 | 3.94E-03 |

|          |          |           |           |
|----------|----------|-----------|-----------|
| SPAG17   | -0.22653 | 2.04E-07  | 6.72E-07  |
| SPAG1    | 0.130451 | 3.02E-03  | 5.62E-03  |
| SPAG4    | 0.297124 | 5.88E-12  | 3.19E-11  |
| SPAG5    | 0.823374 | 2.60E-128 | 7.02E-126 |
| SPAG6    | -0.18012 | 3.93E-05  | 9.70E-05  |
| SPAG7    | -0.23049 | 1.23E-07  | 4.15E-07  |
| SPAG8    | -0.36341 | 1.59E-17  | 1.49E-16  |
| SPAG9    | -0.24845 | 1.10E-08  | 4.17E-08  |
| SPAM1    | 0.020365 | 6.45E-01  | 6.99E-01  |
| SPANXA2  | 0.194005 | 9.24E-06  | 2.49E-05  |
| SPANXB2  | 0.212518 | 1.13E-06  | 3.41E-06  |
| SPANXC   | 0.235897 | 6.06E-08  | 2.11E-07  |
| SPANXE   | 0.21774  | 6.06E-07  | 1.89E-06  |
| SPANXN1  | 0.004306 | 9.22E-01  | 9.38E-01  |
| SPANXN2  | 0.101091 | 2.18E-02  | 3.46E-02  |
| SPANXN3  | 0.132182 | 2.65E-03  | 4.97E-03  |
| SPANXN4  | 0.087982 | 4.60E-02  | 6.83E-02  |
| SPANXN5  | 0.042642 | 3.34E-01  | 4.00E-01  |
| SPARCL1  | -0.43846 | 1.31E-25  | 2.44E-24  |
| SPARC    | 0.056309 | 2.02E-01  | 2.57E-01  |
| SPAST    | 0.368684 | 5.01E-18  | 4.88E-17  |
| SPATA12  | 0.064262 | 1.45E-01  | 1.92E-01  |
| SPATA13  | -0.20733 | 2.08E-06  | 6.06E-06  |
| SPATA16  | 0.053419 | 2.26E-01  | 2.84E-01  |
| SPATA17  | -0.09721 | 2.74E-02  | 4.26E-02  |
| SPATA18  | -0.48898 | 2.60E-32  | 7.75E-31  |
| SPATA19  | -0.04789 | 2.78E-01  | 3.40E-01  |
| SPATA1   | -0.14133 | 1.30E-03  | 2.57E-03  |
| SPATA20  | -0.17873 | 4.52E-05  | 1.11E-04  |
| SPATA21  | 0.077399 | 7.93E-02  | 1.12E-01  |
| SPATA22  | -0.01002 | 8.21E-01  | 8.52E-01  |
| SPATA24  | -0.17381 | 7.34E-05  | 1.75E-04  |
| SPATA2L  | -0.17789 | 4.92E-05  | 1.20E-04  |
| SPATA2   | 0.048913 | 2.68E-01  | 3.30E-01  |
| SPATA3   | 0.018692 | 6.72E-01  | 7.23E-01  |
| SPATA4   | -0.24953 | 9.47E-09  | 3.62E-08  |
| SPATA5L1 | 0.197209 | 6.52E-06  | 1.79E-05  |
| SPATA5   | 0.278409 | 1.27E-10  | 6.00E-10  |
| SPATA6   | -0.32063 | 8.90E-14  | 5.80E-13  |
| SPATA7   | -0.16405 | 1.85E-04  | 4.14E-04  |
| SPATA8   | 0.134469 | 2.23E-03  | 4.23E-03  |
| SPATA9   | -0.10972 | 1.27E-02  | 2.12E-02  |
| SPATC1   | -0.07396 | 9.36E-02  | 1.30E-01  |
| SPATS1   | -0.22092 | 4.11E-07  | 1.31E-06  |

|         |          |           |           |
|---------|----------|-----------|-----------|
| SPATS2L | 0.295572 | 7.66E-12  | 4.08E-11  |
| SPATS2  | 0.461683 | 1.50E-28  | 3.46E-27  |
| SPC24   | 0.794883 | 2.16E-113 | 4.45E-111 |
| SPC25   | 0.877332 | 1.06E-165 | 1.12E-162 |
| SPCS1   | -0.0298  | 5.00E-01  | 5.64E-01  |
| SPCS2   | 0.059485 | 1.78E-01  | 2.30E-01  |
| SPCS3   | 0.060324 | 1.72E-01  | 2.23E-01  |
| SPDEF   | -0.22552 | 2.31E-07  | 7.59E-07  |
| SPDYA   | 0.117327 | 7.69E-03  | 1.33E-02  |
| SPDYC   | 0.106949 | 1.52E-02  | 2.49E-02  |
| SPDYE1  | -0.09648 | 2.86E-02  | 4.43E-02  |
| SPDYE2  | -0.02169 | 6.23E-01  | 6.79E-01  |
| SPDYE3  | 0.231396 | 1.09E-07  | 3.72E-07  |
| SPDYE4  | -0.04086 | 3.55E-01  | 4.21E-01  |
| SPDYE5  | -0.11935 | 6.70E-03  | 1.17E-02  |
| SPDYE6  | -0.09419 | 3.26E-02  | 5.00E-02  |
| SPDYE7P | -0.11443 | 9.35E-03  | 1.59E-02  |
| SPDYE8P | -0.04733 | 2.84E-01  | 3.46E-01  |
| SPEF1   | -0.31318 | 3.50E-13  | 2.15E-12  |
| SPEF2   | -0.2819  | 7.30E-11  | 3.51E-10  |
| SPEG    | -0.02832 | 5.21E-01  | 5.85E-01  |
| SPEM1   | 0.113503 | 9.94E-03  | 1.69E-02  |
| SPEN    | -0.17557 | 6.18E-05  | 1.48E-04  |
| SPERT   | 0.0292   | 5.08E-01  | 5.72E-01  |
| SPESP1  | 0.031197 | 4.80E-01  | 5.45E-01  |
| SPG11   | -0.26947 | 5.11E-10  | 2.26E-09  |
| SPG20   | -0.13425 | 2.27E-03  | 4.30E-03  |
| SPG21   | -0.04865 | 2.70E-01  | 3.32E-01  |
| SPG7    | -0.27958 | 1.06E-10  | 5.00E-10  |
| SPHAR   | -0.45104 | 3.56E-27  | 7.46E-26  |
| SPHK1   | 0.484985 | 9.70E-32  | 2.79E-30  |
| SPHK2   | -0.14138 | 1.30E-03  | 2.56E-03  |
| SPHKAP  | -0.11623 | 8.29E-03  | 1.43E-02  |
| SPI1    | -0.10215 | 2.04E-02  | 3.26E-02  |
| SPIB    | -0.18305 | 2.92E-05  | 7.33E-05  |
| SPIC    | 0.064495 | 1.44E-01  | 1.90E-01  |
| SPIN1   | 0.051808 | 2.41E-01  | 3.00E-01  |
| SPIN2A  | 0.045975 | 2.98E-01  | 3.61E-01  |
| SPIN2B  | -0.14436 | 1.02E-03  | 2.04E-03  |
| SPIN3   | -0.15157 | 5.58E-04  | 1.16E-03  |
| SPIN4   | 0.378456 | 5.54E-19  | 5.88E-18  |
| SPINK13 | -0.10522 | 1.69E-02  | 2.75E-02  |
| SPINK14 | -0.11828 | 7.21E-03  | 1.26E-02  |
| SPINK1  | -0.19701 | 6.66E-06  | 1.83E-05  |

|         |          |          |          |
|---------|----------|----------|----------|
| SPINK2  | -0.14438 | 1.02E-03 | 2.04E-03 |
| SPINK4  | -0.12235 | 5.43E-03 | 9.69E-03 |
| SPINK5  | -0.38725 | 7.15E-20 | 8.24E-19 |
| SPINK6  | -0.01266 | 7.74E-01 | 8.12E-01 |
| SPINK7  | -0.08508 | 5.37E-02 | 7.86E-02 |
| SPINK8  | 0.049678 | 2.60E-01 | 3.22E-01 |
| SPINK9  | -0.13758 | 1.75E-03 | 3.38E-03 |
| SPINLW1 | -0.21408 | 9.42E-07 | 2.86E-06 |
| SPINT1  | -0.01443 | 7.44E-01 | 7.87E-01 |
| SPINT2  | 0.101232 | 2.16E-02 | 3.43E-02 |
| SPINT3  | -0.05913 | 1.80E-01 | 2.33E-01 |
| SPINT4  | 0.021161 | 6.32E-01 | 6.87E-01 |
| SPIRE1  | -0.12114 | 5.91E-03 | 1.05E-02 |
| SPIRE2  | -0.20769 | 2.00E-06 | 5.84E-06 |
| SPNS1   | 0.030749 | 4.86E-01 | 5.51E-01 |
| SPNS2   | -0.20812 | 1.90E-06 | 5.57E-06 |
| SPNS3   | -0.2532  | 5.63E-09 | 2.21E-08 |
| SPN     | -0.27053 | 4.35E-10 | 1.94E-09 |
| SPO11   | 0.034255 | 4.38E-01 | 5.04E-01 |
| SPOCD1  | 0.331654 | 1.09E-14 | 7.73E-14 |
| SPOCK1  | 0.32235  | 6.45E-14 | 4.26E-13 |
| SPOCK2  | -0.21592 | 7.55E-07 | 2.32E-06 |
| SPOCK3  | 0.011864 | 7.88E-01 | 8.25E-01 |
| SPON1   | -0.24939 | 9.65E-09 | 3.69E-08 |
| SPON2   | 0.006236 | 8.88E-01 | 9.09E-01 |
| SPOPL   | 0.183807 | 2.71E-05 | 6.82E-05 |
| SPOP    | -0.1067  | 1.54E-02 | 2.53E-02 |
| SPP1    | 0.268392 | 6.02E-10 | 2.64E-09 |
| SPP2    | -0.10959 | 1.28E-02 | 2.14E-02 |
| SPPL2A  | 0.078449 | 7.53E-02 | 1.07E-01 |
| SPPL2B  | -0.13048 | 3.01E-03 | 5.61E-03 |
| SPPL3   | 0.09708  | 2.76E-02 | 4.29E-02 |
| SPRED1  | -0.15769 | 3.28E-04 | 7.08E-04 |
| SPRED2  | -0.23144 | 1.09E-07 | 3.69E-07 |
| SPRED3  | 0.27128  | 3.87E-10 | 1.74E-09 |
| SPRN    | -0.11148 | 1.14E-02 | 1.91E-02 |
| SPRR1A  | 0.036137 | 4.13E-01 | 4.80E-01 |
| SPRR1B  | 0.079142 | 7.27E-02 | 1.04E-01 |
| SPRR2A  | 0.113294 | 1.01E-02 | 1.71E-02 |
| SPRR2B  | 0.067642 | 1.25E-01 | 1.69E-01 |
| SPRR2C  | 0.048479 | 2.72E-01 | 3.34E-01 |
| SPRR2D  | 0.1237   | 4.94E-03 | 8.88E-03 |
| SPRR2E  | 0.161523 | 2.32E-04 | 5.14E-04 |
| SPRR2F  | 0.151801 | 5.47E-04 | 1.14E-03 |

|         |          |          |          |
|---------|----------|----------|----------|
| SPRR2G  | -0.02643 | 5.50E-01 | 6.12E-01 |
| SPRR3   | 0.073268 | 9.67E-02 | 1.34E-01 |
| SPRR4   | 0.063279 | 1.52E-01 | 2.00E-01 |
| SPRY1   | -0.36169 | 2.32E-17 | 2.15E-16 |
| SPRY2   | -0.3481  | 4.08E-16 | 3.32E-15 |
| SPRY3   | 0.046205 | 2.95E-01 | 3.58E-01 |
| SPRY4   | -0.38561 | 1.05E-19 | 1.19E-18 |
| SPRYD3  | -0.34344 | 1.06E-15 | 8.23E-15 |
| SPRYD4  | 0.093832 | 3.33E-02 | 5.09E-02 |
| SPRYD5  | -0.18674 | 2.00E-05 | 5.14E-05 |
| SPR     | -0.1371  | 1.82E-03 | 3.50E-03 |
| SPSB1   | -0.11536 | 8.78E-03 | 1.50E-02 |
| SPSB2   | -0.16371 | 1.91E-04 | 4.27E-04 |
| SPSB3   | -0.38279 | 2.04E-19 | 2.26E-18 |
| SPSB4   | 0.042553 | 3.35E-01 | 4.01E-01 |
| SPTA1   | 0.098243 | 2.58E-02 | 4.03E-02 |
| SPTAN1  | -0.06565 | 1.37E-01 | 1.82E-01 |
| SPTBN1  | -0.07772 | 7.80E-02 | 1.10E-01 |
| SPTBN2  | 0.090618 | 3.98E-02 | 6.00E-02 |
| SPTBN4  | -0.02483 | 5.74E-01 | 6.34E-01 |
| SPTBN5  | -0.15599 | 3.81E-04 | 8.14E-04 |
| SPTB    | 0.059021 | 1.81E-01 | 2.34E-01 |
| SPTLC1  | 0.165979 | 1.54E-04 | 3.50E-04 |
| SPTLC2  | -0.18963 | 1.48E-05 | 3.86E-05 |
| SPTLC3  | -0.37112 | 2.91E-18 | 2.91E-17 |
| SPTY2D1 | 0.156571 | 3.62E-04 | 7.77E-04 |
| SPZ1    | 0.028353 | 5.21E-01 | 5.85E-01 |
| SQLE    | 0.227124 | 1.89E-07 | 6.26E-07 |
| SQRDL   | 0.027381 | 5.35E-01 | 5.98E-01 |
| SQSTM1  | -0.08606 | 5.10E-02 | 7.50E-02 |
| SR140   | 0.360897 | 2.75E-17 | 2.53E-16 |
| SRA1    | 0.000989 | 9.82E-01 | 9.86E-01 |
| SRBD1   | 0.099335 | 2.42E-02 | 3.81E-02 |
| SRCAP   | -0.19181 | 1.17E-05 | 3.10E-05 |
| SRCIN1  | -0.14782 | 7.65E-04 | 1.57E-03 |
| SRCRB4D | 0.137957 | 1.70E-03 | 3.29E-03 |
| SRC     | 0.054554 | 2.16E-01 | 2.73E-01 |
| SRD5A1  | 0.250355 | 8.43E-09 | 3.24E-08 |
| SRD5A2  | -0.16538 | 1.63E-04 | 3.69E-04 |
| SRD5A3  | 0.008558 | 8.46E-01 | 8.74E-01 |
| SREBF1  | -0.11938 | 6.68E-03 | 1.17E-02 |
| SREBF2  | -0.16798 | 1.28E-04 | 2.94E-04 |
| SRFBP1  | 0.176006 | 5.92E-05 | 1.43E-04 |
| SRF     | -0.01377 | 7.55E-01 | 7.96E-01 |

|        |          |          |          |
|--------|----------|----------|----------|
| SRGAP1 | 0.290773 | 1.71E-11 | 8.80E-11 |
| SRGAP2 | -0.00656 | 8.82E-01 | 9.04E-01 |
| SRGAP3 | -0.31929 | 1.14E-13 | 7.36E-13 |
| SRGN   | 0.139545 | 1.50E-03 | 2.93E-03 |
| SRI    | -0.0169  | 7.02E-01 | 7.50E-01 |
| SRL    | -0.41568 | 6.20E-23 | 9.21E-22 |
| SRMS   | 0.046664 | 2.91E-01 | 3.53E-01 |
| SRM    | 0.35894  | 4.18E-17 | 3.78E-16 |
| SRP14  | -0.03997 | 3.65E-01 | 4.32E-01 |
| SRP19  | 0.168863 | 1.18E-04 | 2.72E-04 |
| SRP54  | 0.242912 | 2.36E-08 | 8.63E-08 |
| SRP68  | 0.240784 | 3.16E-08 | 1.14E-07 |
| SRP72  | 0.380016 | 3.87E-19 | 4.17E-18 |
| SRP9   | 0.117196 | 7.76E-03 | 1.34E-02 |
| SRPK1  | 0.463916 | 7.59E-29 | 1.80E-27 |
| SRPK2  | 0.377883 | 6.32E-19 | 6.65E-18 |
| SRPK3  | -0.05406 | 2.21E-01 | 2.78E-01 |
| SRPRB  | 0.388674 | 5.11E-20 | 5.98E-19 |
| SRPR   | -0.01016 | 8.18E-01 | 8.50E-01 |
| SRPX2  | 0.204129 | 3.01E-06 | 8.60E-06 |
| SRPX   | -0.23804 | 4.56E-08 | 1.61E-07 |
| SRRD   | 0.256784 | 3.37E-09 | 1.35E-08 |
| SRRM1  | 0.059808 | 1.75E-01 | 2.27E-01 |
| SRRM2  | -0.28692 | 3.23E-11 | 1.61E-10 |
| SRRM3  | 0.104132 | 1.81E-02 | 2.93E-02 |
| SRRM4  | -0.04303 | 3.30E-01 | 3.95E-01 |
| SRRM5  | -0.09355 | 3.38E-02 | 5.16E-02 |
| SRRT   | 0.257175 | 3.18E-09 | 1.28E-08 |
| SRR    | -0.11899 | 6.86E-03 | 1.20E-02 |
| SRXN1  | 0.251979 | 6.70E-09 | 2.61E-08 |
| SRY    | 0.019395 | 6.61E-01 | 7.13E-01 |
| SS18L1 | -0.00207 | 9.63E-01 | 9.71E-01 |
| SS18L2 | 0.074801 | 8.99E-02 | 1.25E-01 |
| SS18   | -0.02333 | 5.97E-01 | 6.55E-01 |
| SSBP1  | 0.429727 | 1.47E-24 | 2.51E-23 |
| SSBP2  | -0.25448 | 4.69E-09 | 1.86E-08 |
| SSBP3  | -0.15756 | 3.31E-04 | 7.16E-04 |
| SSBP4  | -0.18056 | 3.77E-05 | 9.31E-05 |
| SSB    | 0.433141 | 5.77E-25 | 1.01E-23 |
| SSC5D  | -0.34441 | 8.68E-16 | 6.85E-15 |
| SSFA2  | -0.07305 | 9.78E-02 | 1.35E-01 |
| SSH1   | 0.078818 | 7.39E-02 | 1.05E-01 |
| SSH2   | -0.00579 | 8.96E-01 | 9.16E-01 |
| SSH3   | -0.19482 | 8.46E-06 | 2.29E-05 |

|            |          |          |          |
|------------|----------|----------|----------|
| SSNA1      | 0.039491 | 3.71E-01 | 4.37E-01 |
| SSPN       | -0.07126 | 1.06E-01 | 1.45E-01 |
| SSPO       | -0.15915 | 2.88E-04 | 6.28E-04 |
| SSR1       | 0.259075 | 2.41E-09 | 9.87E-09 |
| SSR2       | 0.021809 | 6.21E-01 | 6.78E-01 |
| SSR3       | 0.391244 | 2.77E-20 | 3.33E-19 |
| SSR4       | -0.12411 | 4.79E-03 | 8.64E-03 |
| SSRP1      | 0.443982 | 2.75E-26 | 5.39E-25 |
| SSSCA1     | 0.110366 | 1.22E-02 | 2.04E-02 |
| SSTR1      | -0.26288 | 1.38E-09 | 5.80E-09 |
| SSTR2      | 0.369934 | 3.80E-18 | 3.74E-17 |
| SSTR3      | -0.00037 | 9.93E-01 | 9.95E-01 |
| SSTR4      | -0.20714 | 2.13E-06 | 6.20E-06 |
| SSTR5      | -0.072   | 1.03E-01 | 1.41E-01 |
| SST        | 0.107898 | 1.43E-02 | 2.36E-02 |
| SSU72      | -0.04708 | 2.86E-01 | 3.49E-01 |
| SSX1       | 0.153902 | 4.57E-04 | 9.64E-04 |
| SSX2IP     | 0.550505 | 3.84E-42 | 1.97E-40 |
| SSX2       | 0.134867 | 2.16E-03 | 4.11E-03 |
| SSX3       | 0.074249 | 9.23E-02 | 1.28E-01 |
| SSX4       | 0.120558 | 6.16E-03 | 1.09E-02 |
| SSX5       | 0.024123 | 5.85E-01 | 6.44E-01 |
| SSX6       | 0.104234 | 1.80E-02 | 2.91E-02 |
| SSX7       | 0.036409 | 4.10E-01 | 4.76E-01 |
| SSX8       | 0.079824 | 7.03E-02 | 1.01E-01 |
| ST13       | -0.00545 | 9.02E-01 | 9.21E-01 |
| ST14       | 0.163677 | 1.91E-04 | 4.28E-04 |
| ST18       | 0.101081 | 2.18E-02 | 3.46E-02 |
| ST20       | 0.115162 | 8.90E-03 | 1.52E-02 |
| ST3GAL1    | -0.2568  | 3.36E-09 | 1.35E-08 |
| ST3GAL2    | -0.00776 | 8.61E-01 | 8.86E-01 |
| ST3GAL3    | -0.32883 | 1.89E-14 | 1.30E-13 |
| ST3GAL4    | 0.229414 | 1.41E-07 | 4.75E-07 |
| ST3GAL5    | -0.50693 | 5.64E-35 | 1.92E-33 |
| ST3GAL6    | -0.27942 | 1.08E-10 | 5.13E-10 |
| ST5        | -0.43033 | 1.25E-24 | 2.13E-23 |
| ST6GAL1    | -0.24864 | 1.07E-08 | 4.07E-08 |
| ST6GAL2    | -0.17955 | 4.16E-05 | 1.02E-04 |
| ST6GALNAC1 | -0.32189 | 7.03E-14 | 4.63E-13 |
| ST6GALNAC2 | -0.14881 | 7.05E-04 | 1.45E-03 |
| ST6GALNAC3 | 0.01696  | 7.01E-01 | 7.49E-01 |
| ST6GALNAC4 | -0.40063 | 2.82E-21 | 3.67E-20 |
| ST6GALNAC5 | 0.090394 | 4.03E-02 | 6.07E-02 |
| ST6GALNAC6 | -0.58615 | 7.67E-49 | 5.08E-47 |



|          |          |          |          |
|----------|----------|----------|----------|
| ST7L     | -0.21031 | 1.47E-06 | 4.36E-06 |
| ST7OT1   | -0.08376 | 5.75E-02 | 8.38E-02 |
| ST7OT2   | -0.13212 | 2.66E-03 | 5.00E-03 |
| ST7OT3   | -0.14868 | 7.12E-04 | 1.46E-03 |
| ST7OT4   | 0.199566 | 5.02E-06 | 1.40E-05 |
| ST7      | -0.30584 | 1.30E-12 | 7.54E-12 |
| ST8SIA1  | -0.2015  | 4.04E-06 | 1.14E-05 |
| ST8SIA2  | 0.038486 | 3.83E-01 | 4.50E-01 |
| ST8SIA3  | -0.01004 | 8.20E-01 | 8.52E-01 |
| ST8SIA4  | 0.027199 | 5.38E-01 | 6.01E-01 |
| ST8SIA5  | 0.032367 | 4.64E-01 | 5.29E-01 |
| ST8SIA6  | -0.21431 | 9.16E-07 | 2.79E-06 |
| STAB1    | -0.01967 | 6.56E-01 | 7.09E-01 |
| STAB2    | -0.16886 | 1.18E-04 | 2.72E-04 |
| STAC2    | -0.15417 | 4.46E-04 | 9.43E-04 |
| STAC3    | -0.01126 | 7.99E-01 | 8.34E-01 |
| STAC     | -0.16548 | 1.62E-04 | 3.66E-04 |
| STAG1    | 0.217359 | 6.35E-07 | 1.97E-06 |
| STAG2    | 0.094629 | 3.18E-02 | 4.88E-02 |
| STAG3L1  | -0.04095 | 3.54E-01 | 4.20E-01 |
| STAG3L2  | 0.001201 | 9.78E-01 | 9.84E-01 |
| STAG3L3  | -0.08739 | 4.75E-02 | 7.03E-02 |
| STAG3L4  | 0.163785 | 1.89E-04 | 4.24E-04 |
| STAG3    | 0.124583 | 4.63E-03 | 8.37E-03 |
| STAM2    | -0.17962 | 4.14E-05 | 1.02E-04 |
| STAMBPL1 | 0.140174 | 1.43E-03 | 2.80E-03 |
| STAMPB   | 0.412797 | 1.31E-22 | 1.89E-21 |
| STAM     | 0.244519 | 1.90E-08 | 7.01E-08 |
| STAP1    | -0.19523 | 8.09E-06 | 2.19E-05 |
| STAP2    | -0.06924 | 1.17E-01 | 1.58E-01 |
| STARD10  | -0.14877 | 7.07E-04 | 1.45E-03 |
| STARD13  | -0.22745 | 1.81E-07 | 6.02E-07 |
| STARD3NL | 0.238087 | 4.53E-08 | 1.60E-07 |
| STARD3   | 0.185621 | 2.24E-05 | 5.74E-05 |
| STARD4   | 0.181294 | 3.50E-05 | 8.68E-05 |
| STARD5   | -0.161   | 2.44E-04 | 5.38E-04 |
| STARD6   | 0.133181 | 2.46E-03 | 4.64E-03 |
| STARD7   | 0.216422 | 7.11E-07 | 2.20E-06 |
| STARD8   | -0.19666 | 6.93E-06 | 1.89E-05 |
| STAR     | -0.07205 | 1.02E-01 | 1.41E-01 |
| STAT1    | 0.397811 | 5.64E-21 | 7.18E-20 |
| STAT2    | 0.039784 | 3.68E-01 | 4.34E-01 |
| STAT3    | -0.25998 | 2.11E-09 | 8.70E-09 |
| STAT4    | -0.0121  | 7.84E-01 | 8.21E-01 |

|         |          |           |           |
|---------|----------|-----------|-----------|
| STAT5A  | -0.13565 | 2.03E-03  | 3.89E-03  |
| STAT5B  | -0.24311 | 2.30E-08  | 8.41E-08  |
| STAT6   | -0.40176 | 2.13E-21  | 2.80E-20  |
| STATH   | -0.02814 | 5.24E-01  | 5.88E-01  |
| STAU1   | 0.186863 | 1.97E-05  | 5.08E-05  |
| STAU2   | 0.050325 | 2.54E-01  | 3.15E-01  |
| STBD1   | 0.06469  | 1.43E-01  | 1.89E-01  |
| STC1    | 0.441765 | 5.17E-26  | 9.94E-25  |
| STC2    | 0.43302  | 5.96E-25  | 1.04E-23  |
| STEAP1  | 0.401991 | 2.01E-21  | 2.65E-20  |
| STEAP2  | 0.223968 | 2.81E-07  | 9.14E-07  |
| STEAP3  | -0.2394  | 3.80E-08  | 1.36E-07  |
| STEAP4  | -0.34483 | 7.95E-16  | 6.31E-15  |
| STH     | -0.00935 | 8.32E-01  | 8.62E-01  |
| STIL    | 0.80771  | 8.46E-120 | 1.99E-117 |
| STIM1   | -0.21257 | 1.13E-06  | 3.39E-06  |
| STIM2   | -0.17603 | 5.91E-05  | 1.42E-04  |
| STIP1   | 0.433912 | 4.66E-25  | 8.24E-24  |
| STK10   | -0.06021 | 1.72E-01  | 2.24E-01  |
| STK11IP | -0.06235 | 1.58E-01  | 2.07E-01  |
| STK11   | -0.09587 | 2.96E-02  | 4.57E-02  |
| STK16   | -0.1261  | 4.15E-03  | 7.56E-03  |
| STK17A  | 0.091485 | 3.79E-02  | 5.74E-02  |
| STK17B  | -0.24932 | 9.75E-09  | 3.72E-08  |
| STK19   | -0.17378 | 7.36E-05  | 1.75E-04  |
| STK24   | 0.176996 | 5.37E-05  | 1.30E-04  |
| STK25   | 0.101804 | 2.08E-02  | 3.33E-02  |
| STK31   | 0.012149 | 7.83E-01  | 8.20E-01  |
| STK32A  | -0.26076 | 1.88E-09  | 7.81E-09  |
| STK32B  | -0.25186 | 6.81E-09  | 2.65E-08  |
| STK32C  | -0.08528 | 5.31E-02  | 7.79E-02  |
| STK33   | -0.3386  | 2.79E-15  | 2.08E-14  |
| STK35   | 0.103503 | 1.88E-02  | 3.03E-02  |
| STK36   | -0.18502 | 2.39E-05  | 6.07E-05  |
| STK38L  | 0.350977 | 2.25E-16  | 1.88E-15  |
| STK38   | 0.087255 | 4.78E-02  | 7.07E-02  |
| STK39   | 0.043205 | 3.28E-01  | 3.93E-01  |
| STK3    | 0.02562  | 5.62E-01  | 6.22E-01  |
| STK40   | -0.10966 | 1.28E-02  | 2.13E-02  |
| STK4    | 0.059477 | 1.78E-01  | 2.30E-01  |
| STL     | -0.22411 | 2.76E-07  | 8.99E-07  |
| STMN1   | 0.606642 | 4.40E-53  | 3.20E-51  |
| STMN2   | -0.17834 | 4.70E-05  | 1.15E-04  |
| STMN3   | 0.030408 | 4.91E-01  | 5.56E-01  |

|               |          |          |          |
|---------------|----------|----------|----------|
| STMN4         | -0.00254 | 9.54E-01 | 9.64E-01 |
| STOML1        | -0.11685 | 7.95E-03 | 1.37E-02 |
| STOML2        | 0.409856 | 2.78E-22 | 3.92E-21 |
| STOML3        | -0.25619 | 3.67E-09 | 1.47E-08 |
| STOM          | -0.27164 | 3.66E-10 | 1.65E-09 |
| STON1-GTF2A1L | 0.07496  | 8.93E-02 | 1.24E-01 |
| STON1         | 0.002003 | 9.64E-01 | 9.72E-01 |
| STON2         | 0.078175 | 7.63E-02 | 1.08E-01 |
| STOX1         | 0.079298 | 7.22E-02 | 1.03E-01 |
| STOX2         | -0.15724 | 3.41E-04 | 7.35E-04 |
| STRA13        | 0.23437  | 7.41E-08 | 2.56E-07 |
| STRA6         | 0.270155 | 4.60E-10 | 2.05E-09 |
| STRA8         | 0.027218 | 5.38E-01 | 6.00E-01 |
| STRADA        | -0.11935 | 6.70E-03 | 1.17E-02 |
| STRADB        | -0.01398 | 7.52E-01 | 7.93E-01 |
| STRAP         | 0.513667 | 5.13E-36 | 1.87E-34 |
| STRBP         | 0.135426 | 2.07E-03 | 3.95E-03 |
| STRC          | -0.03109 | 4.81E-01 | 5.47E-01 |
| STRN3         | 0.279791 | 1.02E-10 | 4.86E-10 |
| STRN4         | 0.246851 | 1.38E-08 | 5.15E-08 |
| STRN          | 0.316905 | 1.77E-13 | 1.12E-12 |
| STS           | -0.15868 | 3.00E-04 | 6.52E-04 |
| STT3A         | 0.202933 | 3.44E-06 | 9.80E-06 |
| STT3B         | 0.047783 | 2.79E-01 | 3.41E-01 |
| STUB1         | -0.18429 | 2.57E-05 | 6.51E-05 |
| STX10         | -0.15017 | 6.28E-04 | 1.30E-03 |
| STX11         | -0.10614 | 1.60E-02 | 2.61E-02 |
| STX12         | -0.20627 | 2.35E-06 | 6.81E-06 |
| STX16         | -0.09078 | 3.95E-02 | 5.95E-02 |
| STX17         | -0.17186 | 8.86E-05 | 2.08E-04 |
| STX18         | 0.145172 | 9.53E-04 | 1.92E-03 |
| STX19         | -0.25174 | 6.94E-09 | 2.70E-08 |
| STX1A         | 0.274551 | 2.33E-10 | 1.07E-09 |
| STX1B         | 0.098951 | 2.47E-02 | 3.89E-02 |
| STX2          | 0.113109 | 1.02E-02 | 1.73E-02 |
| STX3          | 0.024635 | 5.77E-01 | 6.36E-01 |
| STX4          | -0.06318 | 1.52E-01 | 2.00E-01 |
| STX5          | -0.04687 | 2.88E-01 | 3.51E-01 |
| STX6          | -0.20372 | 3.15E-06 | 8.99E-06 |
| STX7          | -0.0591  | 1.81E-01 | 2.33E-01 |
| STX8          | 0.005577 | 9.00E-01 | 9.19E-01 |
| STXBP1        | -0.42118 | 1.46E-23 | 2.31E-22 |
| STXBP2        | -0.13121 | 2.85E-03 | 5.33E-03 |
| STXBP3        | 0.072488 | 1.00E-01 | 1.38E-01 |

|         |          |          |          |
|---------|----------|----------|----------|
| STXBP4  | -0.1202  | 6.31E-03 | 1.11E-02 |
| STXBP5L | 0.290737 | 1.72E-11 | 8.85E-11 |
| STXBP5  | 0.242777 | 2.41E-08 | 8.78E-08 |
| STXBP6  | -0.12044 | 6.21E-03 | 1.10E-02 |
| STYK1   | 0.359596 | 3.63E-17 | 3.31E-16 |
| STYXL1  | 0.161962 | 2.23E-04 | 4.96E-04 |
| STYX    | 0.276436 | 1.74E-10 | 8.09E-10 |
| SUB1    | 0.24837  | 1.11E-08 | 4.21E-08 |
| SUCLA2  | 0.068207 | 1.22E-01 | 1.65E-01 |
| SUCLG1  | 0.137254 | 1.80E-03 | 3.47E-03 |
| SUCLG2  | -0.20504 | 2.71E-06 | 7.80E-06 |
| SUCNR1  | 0.02388  | 5.89E-01 | 6.47E-01 |
| SUDS3   | 0.224129 | 2.76E-07 | 8.96E-07 |
| SUFU    | -0.2305  | 1.23E-07 | 4.15E-07 |
| SUGT1L1 | -0.47526 | 2.22E-30 | 5.86E-29 |
| SUGT1P1 | 0.09362  | 3.37E-02 | 5.15E-02 |
| SUGT1   | 0.236714 | 5.44E-08 | 1.91E-07 |
| SULF1   | 0.356284 | 7.37E-17 | 6.46E-16 |
| SULF2   | 0.166743 | 1.44E-04 | 3.27E-04 |
| SULT1A1 | -0.37157 | 2.63E-18 | 2.64E-17 |
| SULT1A2 | -0.34026 | 2.01E-15 | 1.51E-14 |
| SULT1A3 | -0.014   | 7.51E-01 | 7.93E-01 |
| SULT1B1 | -0.13446 | 2.23E-03 | 4.23E-03 |
| SULT1C2 | -0.31101 | 5.17E-13 | 3.13E-12 |
| SULT1C3 | -0.04044 | 3.60E-01 | 4.26E-01 |
| SULT1C4 | -0.32384 | 4.87E-14 | 3.25E-13 |
| SULT1E1 | -0.19449 | 8.77E-06 | 2.37E-05 |
| SULT2A1 | 0.022502 | 6.10E-01 | 6.67E-01 |
| SULT2B1 | 0.202004 | 3.82E-06 | 1.08E-05 |
| SULT4A1 | 0.044215 | 3.17E-01 | 3.81E-01 |
| SULT6B1 | -0.0119  | 7.88E-01 | 8.24E-01 |
| SUMF1   | -0.2862  | 3.64E-11 | 1.80E-10 |
| SUMF2   | -0.18531 | 2.32E-05 | 5.91E-05 |
| SUMO1P1 | 0.013386 | 7.62E-01 | 8.02E-01 |
| SUMO1P3 | 0.235315 | 6.55E-08 | 2.28E-07 |
| SUMO1   | 0.250758 | 7.96E-09 | 3.07E-08 |
| SUMO2   | 0.395001 | 1.12E-20 | 1.39E-19 |
| SUMO3   | 0.128958 | 3.37E-03 | 6.22E-03 |
| SUMO4   | 0.098257 | 2.58E-02 | 4.03E-02 |
| SUN1    | 0.064186 | 1.46E-01 | 1.93E-01 |
| SUN2    | -0.22532 | 2.37E-07 | 7.78E-07 |
| SUN3    | 0.118655 | 7.02E-03 | 1.23E-02 |
| SUOX    | -0.39864 | 4.60E-21 | 5.90E-20 |
| SUPT16H | 0.378554 | 5.42E-19 | 5.75E-18 |

|          |          |          |          |
|----------|----------|----------|----------|
| SUPT3H   | 0.109362 | 1.30E-02 | 2.17E-02 |
| SUPT4H1  | 0.167807 | 1.30E-04 | 2.98E-04 |
| SUPT5H   | 0.085849 | 5.15E-02 | 7.58E-02 |
| SUPT6H   | -0.05468 | 2.15E-01 | 2.72E-01 |
| SUPT7L   | 0.258927 | 2.47E-09 | 1.01E-08 |
| SUPV3L1  | 0.268724 | 5.72E-10 | 2.52E-09 |
| SURF1    | -0.12949 | 3.24E-03 | 6.00E-03 |
| SURF2    | 0.028546 | 5.18E-01 | 5.82E-01 |
| SURF4    | 0.040291 | 3.62E-01 | 4.28E-01 |
| SURF6    | -0.20209 | 3.79E-06 | 1.07E-05 |
| SUSD1    | -0.04645 | 2.93E-01 | 3.56E-01 |
| SUSD2    | -0.64366 | 1.40E-61 | 1.27E-59 |
| SUSD3    | -0.17022 | 1.04E-04 | 2.41E-04 |
| SUSD4    | -0.38877 | 5.00E-20 | 5.85E-19 |
| SUSD5    | -0.012   | 7.86E-01 | 8.23E-01 |
| SUV39H1  | 0.618738 | 9.81E-56 | 7.60E-54 |
| SUV39H2  | 0.60714  | 3.44E-53 | 2.52E-51 |
| SUV420H1 | -0.02747 | 5.34E-01 | 5.97E-01 |
| SUV420H2 | 0.050615 | 2.52E-01 | 3.12E-01 |
| SUZ12P   | 0.111685 | 1.12E-02 | 1.89E-02 |
| SUZ12    | 0.474287 | 3.03E-30 | 7.94E-29 |
| SV2A     | 0.335196 | 5.47E-15 | 3.99E-14 |
| SV2B     | -0.07584 | 8.55E-02 | 1.20E-01 |
| SV2C     | -0.03716 | 4.00E-01 | 4.66E-01 |
| SVEP1    | -0.34329 | 1.09E-15 | 8.47E-15 |
| SVIL     | -0.07149 | 1.05E-01 | 1.44E-01 |
| SVIP     | 0.002428 | 9.56E-01 | 9.65E-01 |
| SVOPL    | -0.04658 | 2.91E-01 | 3.54E-01 |
| SVOP     | 0.09477  | 3.15E-02 | 4.84E-02 |
| SWAP70   | -0.33256 | 9.17E-15 | 6.53E-14 |
| SYAP1    | 0.167551 | 1.33E-04 | 3.05E-04 |
| SYBU     | -0.42025 | 1.87E-23 | 2.92E-22 |
| SYCE1L   | -0.04038 | 3.60E-01 | 4.26E-01 |
| SYCE1    | 0.002625 | 9.53E-01 | 9.62E-01 |
| SYCE2    | 0.477328 | 1.15E-30 | 3.10E-29 |
| SYCN     | -0.04433 | 3.15E-01 | 3.80E-01 |
| SYCP1    | 0.106229 | 1.59E-02 | 2.60E-02 |
| SYCP2L   | 0.030275 | 4.93E-01 | 5.58E-01 |
| SYCP2    | 0.125292 | 4.40E-03 | 7.98E-03 |
| SYCP3    | -0.1237  | 4.94E-03 | 8.88E-03 |
| SYDE1    | -0.05819 | 1.87E-01 | 2.41E-01 |
| SYDE2    | -0.18245 | 3.11E-05 | 7.77E-05 |
| SYF2     | -0.29124 | 1.59E-11 | 8.17E-11 |
| SYK      | -0.10344 | 1.89E-02 | 3.04E-02 |

|             |          |          |          |
|-------------|----------|----------|----------|
| SYMPK       | 0.111646 | 1.12E-02 | 1.89E-02 |
| SYN1        | -0.03177 | 4.72E-01 | 5.38E-01 |
| SYN2        | -0.0433  | 3.27E-01 | 3.92E-01 |
| SYN3        | -0.16246 | 2.14E-04 | 4.75E-04 |
| SYNCRIP     | 0.307271 | 1.01E-12 | 5.92E-12 |
| SYNC        | -0.34265 | 1.24E-15 | 9.59E-15 |
| SYNE1       | -0.54137 | 1.49E-40 | 7.10E-39 |
| SYNE2       | -0.25484 | 4.46E-09 | 1.77E-08 |
| SYNGAP1     | -0.15795 | 3.20E-04 | 6.93E-04 |
| SYNGR1      | -0.12206 | 5.55E-03 | 9.88E-03 |
| SYNGR2      | -0.09779 | 2.65E-02 | 4.13E-02 |
| SYNGR3      | 0.175941 | 5.96E-05 | 1.44E-04 |
| SYNGR4      | 0.371589 | 2.62E-18 | 2.63E-17 |
| SYNJ1       | -0.19432 | 8.93E-06 | 2.41E-05 |
| SYNJ2BP     | -0.17384 | 7.32E-05 | 1.74E-04 |
| SYNJ2       | 0.344184 | 9.08E-16 | 7.15E-15 |
| SYNM        | -0.14198 | 1.24E-03 | 2.45E-03 |
| SYNPO2L     | 0.003452 | 9.38E-01 | 9.51E-01 |
| SYNPO2      | -0.30445 | 1.66E-12 | 9.53E-12 |
| SYNPO       | -0.38088 | 3.17E-19 | 3.45E-18 |
| SYNPR       | -0.01238 | 7.79E-01 | 8.17E-01 |
| SYNRG       | -0.0307  | 4.87E-01 | 5.52E-01 |
| SYPL1       | 0.000449 | 9.92E-01 | 9.94E-01 |
| SYPL2       | -0.08563 | 5.21E-02 | 7.66E-02 |
| SYP         | -0.17561 | 6.15E-05 | 1.48E-04 |
| SYS1-DBNDD2 | -0.17483 | 6.64E-05 | 1.59E-04 |
| SYS1        | -0.16804 | 1.27E-04 | 2.93E-04 |
| SYT10       | 0.124037 | 4.82E-03 | 8.68E-03 |
| SYT11       | 0.034011 | 4.41E-01 | 5.08E-01 |
| SYT12       | 0.126592 | 4.01E-03 | 7.31E-03 |
| SYT13       | 0.163404 | 1.96E-04 | 4.38E-04 |
| SYT14L      | 0.025516 | 5.63E-01 | 6.24E-01 |
| SYT14       | 0.178256 | 4.74E-05 | 1.16E-04 |
| SYT15       | -0.41567 | 6.22E-23 | 9.24E-22 |
| SYT16       | 0.111543 | 1.13E-02 | 1.90E-02 |
| SYT17       | -0.1699  | 1.07E-04 | 2.48E-04 |
| SYT1        | 0.25038  | 8.40E-09 | 3.23E-08 |
| SYT2        | -0.27024 | 4.54E-10 | 2.03E-09 |
| SYT3        | -0.11614 | 8.33E-03 | 1.43E-02 |
| SYT4        | -0.00037 | 9.93E-01 | 9.95E-01 |
| SYT5        | 0.251865 | 6.81E-09 | 2.65E-08 |
| SYT6        | -0.03986 | 3.67E-01 | 4.33E-01 |
| SYT7        | -0.00872 | 8.43E-01 | 8.72E-01 |
| SYT8        | -0.20768 | 2.00E-06 | 5.84E-06 |

|         |          |           |           |
|---------|----------|-----------|-----------|
| SYT9    | -0.02494 | 5.72E-01  | 6.32E-01  |
| SYTL1   | -0.34862 | 3.66E-16  | 2.99E-15  |
| SYTL2   | -0.08959 | 4.21E-02  | 6.31E-02  |
| SYTL3   | -0.19532 | 8.01E-06  | 2.17E-05  |
| SYTL4   | 0.054256 | 2.19E-01  | 2.76E-01  |
| SYTL5   | -0.11209 | 1.09E-02  | 1.84E-02  |
| SYVN1   | -0.23847 | 4.31E-08  | 1.53E-07  |
| TAAR1   | 0.137723 | 1.73E-03  | 3.35E-03  |
| TAAR6   | 0.021031 | 6.34E-01  | 6.89E-01  |
| TAAR8   | 0.111012 | 1.17E-02  | 1.96E-02  |
| TAAR9   | 0.086362 | 5.01E-02  | 7.39E-02  |
| TAB1    | -0.26431 | 1.11E-09  | 4.74E-09  |
| TAB2    | 0.116145 | 8.33E-03  | 1.43E-02  |
| TAB3    | -0.08231 | 6.20E-02  | 8.97E-02  |
| TAC1    | 0.16116  | 2.40E-04  | 5.31E-04  |
| TAC3    | 0.14031  | 1.41E-03  | 2.77E-03  |
| TAC4    | -0.17673 | 5.52E-05  | 1.33E-04  |
| TACC1   | -0.28716 | 3.11E-11  | 1.55E-10  |
| TACC2   | -0.25351 | 5.39E-09  | 2.12E-08  |
| TACC3   | 0.776326 | 6.84E-105 | 1.19E-102 |
| TACO1   | 0.439763 | 9.10E-26  | 1.71E-24  |
| TACR1   | -0.10149 | 2.12E-02  | 3.38E-02  |
| TACR2   | -0.12191 | 5.60E-03  | 9.97E-03  |
| TACR3   | 0.257044 | 3.24E-09  | 1.31E-08  |
| TACSTD2 | -0.10315 | 1.92E-02  | 3.09E-02  |
| TADA1   | 0.097122 | 2.75E-02  | 4.28E-02  |
| TADA2A  | 0.273631 | 2.69E-10  | 1.23E-09  |
| TADA2B  | -0.29588 | 7.27E-12  | 3.89E-11  |
| TADA3   | -0.06239 | 1.57E-01  | 2.06E-01  |
| TAF10   | 0.125929 | 4.21E-03  | 7.65E-03  |
| TAF11   | 0.304667 | 1.60E-12  | 9.20E-12  |
| TAF12   | -0.01222 | 7.82E-01  | 8.19E-01  |
| TAF13   | 0.266742 | 7.73E-10  | 3.35E-09  |
| TAF15   | 0.02467  | 5.76E-01  | 6.36E-01  |
| TAF1A   | 0.375988 | 9.73E-19  | 1.01E-17  |
| TAF1B   | 0.274466 | 2.36E-10  | 1.09E-09  |
| TAF1C   | -0.20857 | 1.80E-06  | 5.30E-06  |
| TAF1D   | 0.113503 | 9.94E-03  | 1.69E-02  |
| TAF1L   | -0.14615 | 8.80E-04  | 1.78E-03  |
| TAF1    | -0.19866 | 5.55E-06  | 1.54E-05  |
| TAF2    | 0.369073 | 4.60E-18  | 4.50E-17  |
| TAF3    | 0.020449 | 6.43E-01  | 6.98E-01  |
| TAF4B   | 0.045607 | 3.02E-01  | 3.65E-01  |
| TAF4    | 0.14802  | 7.53E-04  | 1.54E-03  |

|         |          |          |          |
|---------|----------|----------|----------|
| TAF5L   | 0.079696 | 7.08E-02 | 1.01E-01 |
| TAF5    | 0.358513 | 4.58E-17 | 4.13E-16 |
| TAF6L   | -0.10029 | 2.28E-02 | 3.61E-02 |
| TAF6    | 0.306633 | 1.13E-12 | 6.58E-12 |
| TAF7L   | 0.16582  | 1.57E-04 | 3.55E-04 |
| TAF7    | -0.02856 | 5.18E-01 | 5.82E-01 |
| TAF8    | -0.16509 | 1.68E-04 | 3.78E-04 |
| TAF9B   | -0.03107 | 4.82E-01 | 5.47E-01 |
| TAF9    | 0.265568 | 9.22E-10 | 3.96E-09 |
| TAGAP   | -0.11583 | 8.51E-03 | 1.46E-02 |
| TAGLN2  | -0.1965  | 7.04E-06 | 1.92E-05 |
| TAGLN3  | 0.174462 | 6.89E-05 | 1.64E-04 |
| TAGLN   | -0.06591 | 1.35E-01 | 1.80E-01 |
| TAL1    | -0.41244 | 1.43E-22 | 2.07E-21 |
| TAL2    | 0.200073 | 4.75E-06 | 1.33E-05 |
| TALDO1  | 0.034616 | 4.33E-01 | 5.00E-01 |
| TANC1   | -0.3405  | 1.91E-15 | 1.45E-14 |
| TANC2   | -0.10565 | 1.65E-02 | 2.68E-02 |
| TANK    | -0.03366 | 4.46E-01 | 5.12E-01 |
| TAOK1   | 0.181854 | 3.30E-05 | 8.22E-05 |
| TAOK2   | -0.26425 | 1.12E-09 | 4.78E-09 |
| TAOK3   | -0.09477 | 3.15E-02 | 4.84E-02 |
| TAP1    | 0.337392 | 3.55E-15 | 2.63E-14 |
| TAP2    | 0.269936 | 4.76E-10 | 2.12E-09 |
| TAPBPL  | -0.02559 | 5.62E-01 | 6.23E-01 |
| TAPBP   | -0.105   | 1.71E-02 | 2.78E-02 |
| TAPT1   | -0.54909 | 6.82E-42 | 3.43E-40 |
| TARBP1  | -0.21437 | 9.09E-07 | 2.77E-06 |
| TARBP2  | 0.238959 | 4.03E-08 | 1.43E-07 |
| TARDBP  | 0.181184 | 3.53E-05 | 8.77E-05 |
| TARM1   | 0.061937 | 1.60E-01 | 2.10E-01 |
| TARP    | -0.16636 | 1.49E-04 | 3.39E-04 |
| TARS2   | 0.052589 | 2.34E-01 | 2.92E-01 |
| TARSL2  | -0.27869 | 1.22E-10 | 5.74E-10 |
| TARS    | 0.56589  | 6.21E-45 | 3.62E-43 |
| TAS1R1  | -0.13806 | 1.69E-03 | 3.27E-03 |
| TAS1R2  | -0.01411 | 7.49E-01 | 7.91E-01 |
| TAS1R3  | 0.074452 | 9.14E-02 | 1.27E-01 |
| TAS2R10 | -0.15314 | 4.87E-04 | 1.02E-03 |
| TAS2R13 | -0.00292 | 9.47E-01 | 9.59E-01 |
| TAS2R14 | -0.13297 | 2.50E-03 | 4.70E-03 |
| TAS2R19 | 0.109579 | 1.28E-02 | 2.14E-02 |
| TAS2R1  | 0.011707 | 7.91E-01 | 8.27E-01 |
| TAS2R20 | -0.0332  | 4.52E-01 | 5.18E-01 |



|          |          |          |          |
|----------|----------|----------|----------|
| TAS2R30  | 0.125717 | 4.27E-03 | 7.76E-03 |
| TAS2R31  | 0.120591 | 6.14E-03 | 1.09E-02 |
| TAS2R38  | -0.09704 | 2.77E-02 | 4.30E-02 |
| TAS2R39  | 0.085655 | 5.21E-02 | 7.65E-02 |
| TAS2R3   | -0.07451 | 9.12E-02 | 1.27E-01 |
| TAS2R40  | 0.054    | 2.21E-01 | 2.79E-01 |
| TAS2R41  | -0.04205 | 3.41E-01 | 4.07E-01 |
| TAS2R42  | -0.00495 | 9.11E-01 | 9.28E-01 |
| TAS2R43  | 0.022639 | 6.08E-01 | 6.65E-01 |
| TAS2R46  | 0.09555  | 3.02E-02 | 4.65E-02 |
| TAS2R4   | -0.21063 | 1.42E-06 | 4.21E-06 |
| TAS2R50  | -0.03256 | 4.61E-01 | 5.27E-01 |
| TAS2R5   | 0.006181 | 8.89E-01 | 9.10E-01 |
| TAS2R60  | 0.091502 | 3.79E-02 | 5.73E-02 |
| TAS2R7   | -0.02914 | 5.09E-01 | 5.73E-01 |
| TAS2R8   | -0.01842 | 6.77E-01 | 7.27E-01 |
| TAS2R9   | 0.038735 | 3.80E-01 | 4.47E-01 |
| TASP1    | -0.07897 | 7.33E-02 | 1.05E-01 |
| TATDN1   | 0.167988 | 1.28E-04 | 2.94E-04 |
| TATDN2   | 0.037334 | 3.98E-01 | 4.64E-01 |
| TATDN3   | -0.09259 | 3.57E-02 | 5.42E-02 |
| TAT      | -0.0462  | 2.95E-01 | 3.58E-01 |
| TAX1BP1  | 0.088127 | 4.56E-02 | 6.79E-02 |
| TAX1BP3  | -0.19039 | 1.36E-05 | 3.58E-05 |
| TAZ      | 0.004532 | 9.18E-01 | 9.35E-01 |
| TBC1D10A | -0.19369 | 9.56E-06 | 2.57E-05 |
| TBC1D10B | 0.177563 | 5.08E-05 | 1.23E-04 |
| TBC1D10C | -0.15337 | 4.78E-04 | 1.01E-03 |
| TBC1D12  | -0.20129 | 4.14E-06 | 1.17E-05 |
| TBC1D13  | -0.1391  | 1.55E-03 | 3.03E-03 |
| TBC1D14  | -0.12945 | 3.25E-03 | 6.02E-03 |
| TBC1D15  | 0.121041 | 5.95E-03 | 1.05E-02 |
| TBC1D16  | 0.116183 | 8.31E-03 | 1.43E-02 |
| TBC1D17  | -0.44386 | 2.84E-26 | 5.57E-25 |
| TBC1D19  | -0.10463 | 1.75E-02 | 2.84E-02 |
| TBC1D1   | 0.260142 | 2.06E-09 | 8.50E-09 |
| TBC1D20  | -0.25876 | 2.53E-09 | 1.03E-08 |
| TBC1D22A | -0.1902  | 1.39E-05 | 3.64E-05 |
| TBC1D22B | -0.01005 | 8.20E-01 | 8.52E-01 |
| TBC1D23  | 0.234501 | 7.28E-08 | 2.52E-07 |
| TBC1D24  | -0.27248 | 3.22E-10 | 1.46E-09 |
| TBC1D25  | -0.14726 | 8.02E-04 | 1.64E-03 |
| TBC1D26  | 0.01335  | 7.62E-01 | 8.02E-01 |
| TBC1D28  | 0.022511 | 6.10E-01 | 6.67E-01 |

|          |          |          |          |
|----------|----------|----------|----------|
| TBC1D29  | 0.124165 | 4.78E-03 | 8.61E-03 |
| TBC1D2B  | -0.27388 | 2.59E-10 | 1.19E-09 |
| TBC1D2   | -0.36925 | 4.42E-18 | 4.33E-17 |
| TBC1D3B  | -0.05625 | 2.03E-01 | 2.58E-01 |
| TBC1D3C  | -0.03454 | 4.34E-01 | 5.01E-01 |
| TBC1D3G  | 0.026957 | 5.42E-01 | 6.04E-01 |
| TBC1D3H  | -0.03831 | 3.86E-01 | 4.52E-01 |
| TBC1D3P2 | 0.05284  | 2.31E-01 | 2.90E-01 |
| TBC1D3   | 0.020767 | 6.38E-01 | 6.93E-01 |
| TBC1D4   | 0.041448 | 3.48E-01 | 4.14E-01 |
| TBC1D5   | -0.22597 | 2.18E-07 | 7.19E-07 |
| TBC1D7   | 0.395077 | 1.10E-20 | 1.37E-19 |
| TBC1D8B  | -0.20308 | 3.38E-06 | 9.65E-06 |
| TBC1D8   | -0.18214 | 3.21E-05 | 8.00E-05 |
| TBC1D9B  | -0.22708 | 1.90E-07 | 6.29E-07 |
| TBC1D9   | -0.17573 | 6.08E-05 | 1.46E-04 |
| TBCA     | 0.234812 | 6.99E-08 | 2.42E-07 |
| TBCB     | 0.2581   | 2.78E-09 | 1.13E-08 |
| TBCCD1   | 0.337606 | 3.40E-15 | 2.52E-14 |
| TBCC     | -0.04788 | 2.78E-01 | 3.40E-01 |
| TBCD     | -0.18445 | 2.53E-05 | 6.41E-05 |
| TBCEL    | -0.17274 | 8.14E-05 | 1.92E-04 |
| TBCE     | 0.192073 | 1.14E-05 | 3.02E-05 |
| TBCK     | -0.25611 | 3.71E-09 | 1.49E-08 |
| TBK1     | 0.329454 | 1.67E-14 | 1.16E-13 |
| TBKBP1   | 0.0182   | 6.80E-01 | 7.31E-01 |
| TBL1XR1  | 0.227442 | 1.81E-07 | 6.02E-07 |
| TBL1X    | 0.062668 | 1.56E-01 | 2.04E-01 |
| TBL1Y    | -0.14255 | 1.18E-03 | 2.34E-03 |
| TBL2     | 0.157932 | 3.21E-04 | 6.94E-04 |
| TBL3     | -0.12169 | 5.69E-03 | 1.01E-02 |
| TBPL1    | 0.316414 | 1.94E-13 | 1.22E-12 |
| TBPL2    | 0.050342 | 2.54E-01 | 3.15E-01 |
| TBP      | 0.275497 | 2.01E-10 | 9.32E-10 |
| TBR1     | 0.299123 | 4.18E-12 | 2.30E-11 |
| TBRG1    | -0.38088 | 3.17E-19 | 3.45E-18 |
| TBRG4    | 0.462585 | 1.14E-28 | 2.65E-27 |
| TBX10    | 0.117453 | 7.63E-03 | 1.32E-02 |
| TBX15    | -0.01867 | 6.73E-01 | 7.24E-01 |
| TBX18    | 0.110612 | 1.20E-02 | 2.01E-02 |
| TBX19    | -0.11079 | 1.19E-02 | 1.99E-02 |
| TBX1     | -0.04804 | 2.77E-01 | 3.39E-01 |
| TBX20    | 0.157982 | 3.19E-04 | 6.91E-04 |
| TBX21    | 0.020269 | 6.46E-01 | 7.00E-01 |

|         |          |          |          |
|---------|----------|----------|----------|
| TBX22   | -0.04865 | 2.70E-01 | 3.32E-01 |
| TBX2    | -0.47811 | 8.99E-31 | 2.44E-29 |
| TBX3    | -0.29143 | 1.54E-11 | 7.94E-11 |
| TBX4    | -0.50448 | 1.33E-34 | 4.47E-33 |
| TBX5    | -0.45589 | 8.52E-28 | 1.87E-26 |
| TBX6    | -0.09845 | 2.55E-02 | 3.99E-02 |
| TBXA2R  | 0.00787  | 8.59E-01 | 8.84E-01 |
| TBXAS1  | -0.1699  | 1.07E-04 | 2.48E-04 |
| TC2N    | -0.09161 | 3.77E-02 | 5.70E-02 |
| TCAM1P  | 0.239658 | 3.67E-08 | 1.31E-07 |
| TCAP    | -0.10247 | 2.00E-02 | 3.21E-02 |
| TCEA1   | 0.137511 | 1.76E-03 | 3.40E-03 |
| TCEA2   | -0.21782 | 6.00E-07 | 1.87E-06 |
| TCEA3   | -0.40516 | 9.11E-22 | 1.23E-20 |
| TCEAL1  | -0.22925 | 1.44E-07 | 4.84E-07 |
| TCEAL2  | -0.26343 | 1.27E-09 | 5.36E-09 |
| TCEAL3  | -0.21623 | 7.28E-07 | 2.25E-06 |
| TCEAL4  | -0.22965 | 1.37E-07 | 4.61E-07 |
| TCEAL5  | -0.10701 | 1.51E-02 | 2.48E-02 |
| TCEAL6  | -0.21672 | 6.86E-07 | 2.12E-06 |
| TCEAL7  | -0.12876 | 3.42E-03 | 6.31E-03 |
| TCEAL8  | -0.1902  | 1.39E-05 | 3.64E-05 |
| TCEANC  | -0.27102 | 4.03E-10 | 1.81E-09 |
| TCEB1   | 0.333965 | 6.97E-15 | 5.03E-14 |
| TCEB2   | -0.03316 | 4.53E-01 | 5.19E-01 |
| TCEB3B  | 0.101198 | 2.16E-02 | 3.44E-02 |
| TCEB3C  | 0.017214 | 6.97E-01 | 7.46E-01 |
| TCEB3   | -0.30059 | 3.25E-12 | 1.81E-11 |
| TCERG1L | -0.02811 | 5.24E-01 | 5.88E-01 |
| TCERG1  | 0.256886 | 3.32E-09 | 1.34E-08 |
| TCF12   | 0.02929  | 5.07E-01 | 5.71E-01 |
| TCF15   | -0.02518 | 5.69E-01 | 6.28E-01 |
| TCF19   | 0.659072 | 1.78E-65 | 1.75E-63 |
| TCF20   | -0.08314 | 5.94E-02 | 8.63E-02 |
| TCF21   | -0.52188 | 2.56E-37 | 9.96E-36 |
| TCF23   | 0.0033   | 9.40E-01 | 9.53E-01 |
| TCF25   | -0.36443 | 1.28E-17 | 1.20E-16 |
| TCF3    | 0.26978  | 4.87E-10 | 2.16E-09 |
| TCF4    | -0.19108 | 1.27E-05 | 3.34E-05 |
| TCF7L1  | -0.31229 | 4.11E-13 | 2.51E-12 |
| TCF7L2  | -0.25711 | 3.21E-09 | 1.30E-08 |
| TCF7    | -0.07673 | 8.19E-02 | 1.15E-01 |
| TCFL5   | 0.110524 | 1.21E-02 | 2.02E-02 |
| TCHHL1  | 0.111256 | 1.15E-02 | 1.94E-02 |

|          |          |          |          |
|----------|----------|----------|----------|
| TCHH     | 0.127715 | 3.69E-03 | 6.78E-03 |
| TCHP     | 0.014121 | 7.49E-01 | 7.91E-01 |
| TCIRG1   | -0.14373 | 1.07E-03 | 2.14E-03 |
| TCL1A    | -0.07301 | 9.79E-02 | 1.35E-01 |
| TCL1B    | 0.032502 | 4.62E-01 | 5.28E-01 |
| TCL6     | 0.106381 | 1.57E-02 | 2.58E-02 |
| TCN1     | 0.042093 | 3.40E-01 | 4.06E-01 |
| TCN2     | -0.05957 | 1.77E-01 | 2.29E-01 |
| TCOF1    | 0.299503 | 3.91E-12 | 2.17E-11 |
| TCP10L2  | -0.01788 | 6.86E-01 | 7.35E-01 |
| TCP10L   | -0.14681 | 8.33E-04 | 1.69E-03 |
| TCP10    | -0.03547 | 4.22E-01 | 4.88E-01 |
| TCP11L1  | 0.127611 | 3.72E-03 | 6.82E-03 |
| TCP11L2  | -0.17921 | 4.31E-05 | 1.06E-04 |
| TCP11    | -0.10091 | 2.20E-02 | 3.49E-02 |
| TCP1     | 0.507457 | 4.68E-35 | 1.61E-33 |
| TCTA     | -0.39411 | 1.39E-20 | 1.71E-19 |
| TCTE1    | -0.28689 | 3.25E-11 | 1.62E-10 |
| TCTE3    | 0.001376 | 9.75E-01 | 9.81E-01 |
| TCTEX1D1 | -0.22293 | 3.20E-07 | 1.03E-06 |
| TCTEX1D2 | 0.251578 | 7.09E-09 | 2.76E-08 |
| TCTEX1D4 | -0.34434 | 8.79E-16 | 6.93E-15 |
| TCTN1    | -0.23793 | 4.63E-08 | 1.63E-07 |
| TCTN2    | -0.06301 | 1.53E-01 | 2.02E-01 |
| TCTN3    | -0.01703 | 7.00E-01 | 7.48E-01 |
| TDGF1    | -0.123   | 5.19E-03 | 9.29E-03 |
| TDGF3    | -0.02698 | 5.41E-01 | 6.04E-01 |
| TDG      | 0.557338 | 2.30E-43 | 1.25E-41 |
| TDH      | -0.05516 | 2.11E-01 | 2.68E-01 |
| TDO2     | 0.271675 | 3.64E-10 | 1.64E-09 |
| TDP1     | 0.383742 | 1.63E-19 | 1.83E-18 |
| TDP2     | 0.239245 | 3.88E-08 | 1.38E-07 |
| TDRD10   | -0.49908 | 8.61E-34 | 2.78E-32 |
| TDRD12   | 0.165017 | 1.69E-04 | 3.81E-04 |
| TDRD1    | -0.08139 | 6.50E-02 | 9.37E-02 |
| TDRD3    | -0.34671 | 5.42E-16 | 4.37E-15 |
| TDRD5    | 0.118844 | 6.93E-03 | 1.21E-02 |
| TDRD6    | -0.27092 | 4.09E-10 | 1.83E-09 |
| TDRD7    | 0.144785 | 9.84E-04 | 1.98E-03 |
| TDRD9    | -0.08947 | 4.24E-02 | 6.35E-02 |
| TDRG1    | 0.228534 | 1.58E-07 | 5.27E-07 |
| TDRKH    | 0.023302 | 5.98E-01 | 6.55E-01 |
| TEAD1    | 0.129879 | 3.15E-03 | 5.85E-03 |
| TEAD2    | -0.09333 | 3.42E-02 | 5.22E-02 |

|         |          |          |          |
|---------|----------|----------|----------|
| TEAD3   | -0.18049 | 3.79E-05 | 9.37E-05 |
| TEAD4   | 0.471685 | 6.87E-30 | 1.75E-28 |
| TECPR1  | -0.11728 | 7.72E-03 | 1.34E-02 |
| TECPR2  | -0.21087 | 1.38E-06 | 4.10E-06 |
| TECRL   | 0.047175 | 2.85E-01 | 3.48E-01 |
| TECR    | -0.17294 | 7.98E-05 | 1.89E-04 |
| TECTA   | -0.3278  | 2.30E-14 | 1.58E-13 |
| TECTB   | -0.06523 | 1.39E-01 | 1.85E-01 |
| TEC     | -0.05386 | 2.22E-01 | 2.80E-01 |
| TEDDM1  | -0.16469 | 1.74E-04 | 3.92E-04 |
| TEF     | -0.55096 | 3.20E-42 | 1.65E-40 |
| TEKT1   | -0.28217 | 6.99E-11 | 3.37E-10 |
| TEKT2   | -0.25152 | 7.15E-09 | 2.77E-08 |
| TEKT3   | -0.35963 | 3.61E-17 | 3.29E-16 |
| TEKT4   | -0.27271 | 3.10E-10 | 1.41E-09 |
| TEKT5   | -0.21103 | 1.35E-06 | 4.03E-06 |
| TEK     | -0.32112 | 8.12E-14 | 5.31E-13 |
| TELO2   | -0.05996 | 1.74E-01 | 2.26E-01 |
| TENC1   | -0.60726 | 3.24E-53 | 2.38E-51 |
| TEP1    | -0.19461 | 8.66E-06 | 2.34E-05 |
| TEPP    | -0.39224 | 2.18E-20 | 2.64E-19 |
| TERC    | 0.14422  | 1.03E-03 | 2.07E-03 |
| TERF1   | 0.175703 | 6.10E-05 | 1.47E-04 |
| TERF2IP | -0.41271 | 1.34E-22 | 1.93E-21 |
| TERF2   | -0.11293 | 1.03E-02 | 1.75E-02 |
| TERT    | 0.300092 | 3.54E-12 | 1.97E-11 |
| TESC    | -0.16307 | 2.02E-04 | 4.51E-04 |
| TESK1   | 0.029194 | 5.09E-01 | 5.72E-01 |
| TESK2   | -0.14157 | 1.28E-03 | 2.52E-03 |
| TES     | 0.208274 | 1.87E-06 | 5.47E-06 |
| TET1    | 0.200709 | 4.42E-06 | 1.24E-05 |
| TET2    | -0.29574 | 7.44E-12 | 3.98E-11 |
| TET3    | 0.18225  | 3.17E-05 | 7.92E-05 |
| TEX101  | 0.183801 | 2.71E-05 | 6.83E-05 |
| TEX10   | 0.422154 | 1.13E-23 | 1.80E-22 |
| TEX11   | 0.155991 | 3.81E-04 | 8.14E-04 |
| TEX12   | 0.015717 | 7.22E-01 | 7.68E-01 |
| TEX13A  | 0.061773 | 1.62E-01 | 2.11E-01 |
| TEX13B  | 0.099521 | 2.39E-02 | 3.77E-02 |
| TEX14   | -0.01414 | 7.49E-01 | 7.91E-01 |
| TEX15   | 0.381509 | 2.74E-19 | 3.00E-18 |
| TEX19   | 0.270149 | 4.60E-10 | 2.05E-09 |
| TEX261  | -0.03599 | 4.15E-01 | 4.81E-01 |
| TEX264  | -0.25501 | 4.35E-09 | 1.73E-08 |

|          |          |          |          |
|----------|----------|----------|----------|
| TEX2     | -0.16092 | 2.46E-04 | 5.41E-04 |
| TEX9     | -0.08973 | 4.18E-02 | 6.27E-02 |
| TFAMP1   | 0.071571 | 1.05E-01 | 1.43E-01 |
| TFAM     | 0.421087 | 1.50E-23 | 2.36E-22 |
| TFAP2A   | 0.280878 | 8.60E-11 | 4.11E-10 |
| TFAP2B   | -0.03546 | 4.22E-01 | 4.88E-01 |
| TFAP2C   | -0.08254 | 6.12E-02 | 8.88E-02 |
| TFAP2D   | 0.015211 | 7.31E-01 | 7.75E-01 |
| TFAP2E   | -0.35303 | 1.46E-16 | 1.24E-15 |
| TFAP4    | 0.011186 | 8.00E-01 | 8.35E-01 |
| TFB1M    | 0.055697 | 2.07E-01 | 2.63E-01 |
| TFB2M    | 0.03748  | 3.96E-01 | 4.63E-01 |
| TFCP2L1  | -0.34681 | 5.31E-16 | 4.29E-15 |
| TFCP2    | 0.16873  | 1.19E-04 | 2.75E-04 |
| TFDP1    | 0.394689 | 1.21E-20 | 1.49E-19 |
| TFDP2    | 0.315644 | 2.23E-13 | 1.40E-12 |
| TFDP3    | -0.02932 | 5.07E-01 | 5.71E-01 |
| TFE3     | -0.05568 | 2.07E-01 | 2.63E-01 |
| TFEB     | -0.42819 | 2.24E-24 | 3.77E-23 |
| TFEC     | 0.043741 | 3.22E-01 | 3.87E-01 |
| TFF1     | 0.087498 | 4.72E-02 | 6.99E-02 |
| TFF2     | 0.008598 | 8.46E-01 | 8.74E-01 |
| TFF3     | -0.07779 | 7.78E-02 | 1.10E-01 |
| TFG      | 0.432409 | 7.05E-25 | 1.23E-23 |
| TFIP11   | 0.062084 | 1.59E-01 | 2.09E-01 |
| TFPI2    | 0.119678 | 6.55E-03 | 1.15E-02 |
| TFPI     | -0.06114 | 1.66E-01 | 2.16E-01 |
| TFPT     | 0.152238 | 5.27E-04 | 1.10E-03 |
| TFR2     | 0.289712 | 2.04E-11 | 1.04E-10 |
| TFRC     | 0.470491 | 9.97E-30 | 2.52E-28 |
| TF       | 0.128591 | 3.46E-03 | 6.38E-03 |
| TGDS     | 0.130963 | 2.90E-03 | 5.42E-03 |
| TGFA     | 0.126757 | 3.96E-03 | 7.23E-03 |
| TGFB1I1  | -0.14485 | 9.78E-04 | 1.97E-03 |
| TGFB1    | -0.13818 | 1.67E-03 | 3.24E-03 |
| TGFB2    | -0.1417  | 1.26E-03 | 2.50E-03 |
| TGFB3    | -0.04489 | 3.09E-01 | 3.73E-01 |
| TGFBI    | 0.255505 | 4.05E-09 | 1.62E-08 |
| TGFBR1   | 0.027492 | 5.34E-01 | 5.97E-01 |
| TGFBR2   | -0.41432 | 8.82E-23 | 1.29E-21 |
| TGFBR3   | -0.32631 | 3.05E-14 | 2.07E-13 |
| TGFBRAP1 | 0.058672 | 1.84E-01 | 2.37E-01 |
| TGIF1    | 0.210332 | 1.47E-06 | 4.35E-06 |
| TGIF2LX  | 0.170836 | 9.77E-05 | 2.28E-04 |

|         |          |          |          |
|---------|----------|----------|----------|
| TGIF2LY | 0.144882 | 9.76E-04 | 1.96E-03 |
| TGIF2   | 0.108283 | 1.39E-02 | 2.31E-02 |
| TGM1    | -0.18864 | 1.64E-05 | 4.26E-05 |
| TGM2    | 0.014155 | 7.49E-01 | 7.91E-01 |
| TGM3    | 0.087792 | 4.64E-02 | 6.89E-02 |
| TGM4    | 0.23482  | 6.99E-08 | 2.42E-07 |
| TGM5    | 0.28451  | 4.79E-11 | 2.34E-10 |
| TGM6    | 0.056997 | 1.97E-01 | 2.51E-01 |
| TGM7    | 0.058388 | 1.86E-01 | 2.39E-01 |
| TGOLN2  | -0.12903 | 3.35E-03 | 6.19E-03 |
| TGS1    | 0.236687 | 5.46E-08 | 1.91E-07 |
| TG      | 0.045437 | 3.03E-01 | 3.67E-01 |
| TH1L    | 0.160371 | 2.58E-04 | 5.66E-04 |
| THADA   | -0.0793  | 7.22E-02 | 1.03E-01 |
| THAP10  | 0.261279 | 1.75E-09 | 7.26E-09 |
| THAP11  | -0.06977 | 1.14E-01 | 1.55E-01 |
| THAP1   | 0.192836 | 1.05E-05 | 2.80E-05 |
| THAP2   | -0.1931  | 1.02E-05 | 2.72E-05 |
| THAP3   | -0.06874 | 1.19E-01 | 1.61E-01 |
| THAP4   | 0.049447 | 2.63E-01 | 3.24E-01 |
| THAP5   | 0.107148 | 1.50E-02 | 2.46E-02 |
| THAP6   | -0.0773  | 7.97E-02 | 1.13E-01 |
| THAP7   | 0.010763 | 8.07E-01 | 8.41E-01 |
| THAP8   | 0.01653  | 7.08E-01 | 7.56E-01 |
| THAP9   | -0.15052 | 6.10E-04 | 1.27E-03 |
| THBD    | -0.24827 | 1.13E-08 | 4.27E-08 |
| THBS1   | 0.037821 | 3.92E-01 | 4.58E-01 |
| THBS2   | 0.209805 | 1.56E-06 | 4.62E-06 |
| THBS3   | -0.20735 | 2.08E-06 | 6.05E-06 |
| THBS4   | -0.19042 | 1.36E-05 | 3.57E-05 |
| THEG    | 0.157177 | 3.43E-04 | 7.39E-04 |
| THEM4   | -0.14671 | 8.39E-04 | 1.71E-03 |
| THEM5   | 0.016524 | 7.08E-01 | 7.56E-01 |
| THEMIS  | -0.03971 | 3.68E-01 | 4.35E-01 |
| THG1L   | -0.09211 | 3.67E-02 | 5.56E-02 |
| THNSL1  | -0.00448 | 9.19E-01 | 9.36E-01 |
| THNSL2  | -0.06586 | 1.36E-01 | 1.81E-01 |
| THOC1   | 0.164403 | 1.79E-04 | 4.02E-04 |
| THOC2   | 0.035733 | 4.18E-01 | 4.85E-01 |
| THOC3   | 0.337773 | 3.29E-15 | 2.44E-14 |
| THOC4   | 0.655791 | 1.26E-64 | 1.21E-62 |
| THOC5   | 0.052802 | 2.32E-01 | 2.90E-01 |
| THOC6   | 0.013146 | 7.66E-01 | 8.05E-01 |
| THOC7   | 0.124515 | 4.66E-03 | 8.41E-03 |

|          |          |          |          |
|----------|----------|----------|----------|
| THOP1    | 0.447254 | 1.07E-26 | 2.16E-25 |
| THPO     | 0.030742 | 4.86E-01 | 5.51E-01 |
| THRAP3   | -0.06218 | 1.59E-01 | 2.08E-01 |
| THRA     | -0.49102 | 1.32E-32 | 3.97E-31 |
| THRB     | -0.27237 | 3.27E-10 | 1.48E-09 |
| THRSP    | -0.07903 | 7.31E-02 | 1.04E-01 |
| THSD1P1  | -0.25657 | 3.47E-09 | 1.39E-08 |
| THSD1    | -0.34003 | 2.10E-15 | 1.58E-14 |
| THSD4    | -0.28192 | 7.28E-11 | 3.51E-10 |
| THSD7A   | 0.097838 | 2.64E-02 | 4.12E-02 |
| THSD7B   | -0.42752 | 2.68E-24 | 4.49E-23 |
| THTPA    | -0.12073 | 6.08E-03 | 1.08E-02 |
| THUMPD1  | -0.35471 | 1.03E-16 | 8.87E-16 |
| THUMPD2  | 0.153537 | 4.71E-04 | 9.93E-04 |
| THUMPD3  | 0.239823 | 3.59E-08 | 1.28E-07 |
| THY1     | 0.116201 | 8.30E-03 | 1.43E-02 |
| THYN1    | -0.19968 | 4.96E-06 | 1.38E-05 |
| TH       | 0.223881 | 2.84E-07 | 9.23E-07 |
| TIA1     | -0.05767 | 1.91E-01 | 2.45E-01 |
| TIAF1    | -0.1301  | 3.10E-03 | 5.76E-03 |
| TIAL1    | 0.227586 | 1.78E-07 | 5.92E-07 |
| TIAM1    | 0.040966 | 3.54E-01 | 4.19E-01 |
| TIAM2    | 0.038517 | 3.83E-01 | 4.49E-01 |
| TICAM1   | 0.074622 | 9.07E-02 | 1.26E-01 |
| TICAM2   | 0.078137 | 7.65E-02 | 1.09E-01 |
| TIE1     | -0.25686 | 3.33E-09 | 1.34E-08 |
| TIFAB    | -0.02644 | 5.49E-01 | 6.11E-01 |
| TIFA     | 0.219748 | 4.74E-07 | 1.50E-06 |
| TIGD1    | 0.016743 | 7.05E-01 | 7.53E-01 |
| TIGD2    | 0.037689 | 3.93E-01 | 4.60E-01 |
| TIGD3    | 0.175894 | 5.99E-05 | 1.44E-04 |
| TIGD4    | -0.18066 | 3.73E-05 | 9.22E-05 |
| TIGD5    | 0.168907 | 1.17E-04 | 2.71E-04 |
| TIGD6    | -0.28948 | 2.12E-11 | 1.08E-10 |
| TIGD7    | 0.006326 | 8.86E-01 | 9.08E-01 |
| TIGIT    | 0.082226 | 6.22E-02 | 9.01E-02 |
| TIMD4    | -0.08424 | 5.61E-02 | 8.18E-02 |
| TIMELESS | 0.674261 | 1.51E-69 | 1.57E-67 |
| TIMM10   | 0.308009 | 8.85E-13 | 5.23E-12 |
| TIMM13   | 0.095123 | 3.09E-02 | 4.76E-02 |
| TIMM16   | 0.100091 | 2.31E-02 | 3.66E-02 |
| TIMM17A  | 0.235115 | 6.72E-08 | 2.34E-07 |
| TIMM17B  | 0.221408 | 3.87E-07 | 1.23E-06 |
| TIMM22   | 0.105878 | 1.62E-02 | 2.65E-02 |



|         |          |           |           |
|---------|----------|-----------|-----------|
| TIMM44  | 0.264419 | 1.10E-09  | 4.66E-09  |
| TIMM50  | 0.358815 | 4.30E-17  | 3.88E-16  |
| TIMM8A  | 0.483307 | 1.68E-31  | 4.75E-30  |
| TIMM8B  | 0.261093 | 1.79E-09  | 7.45E-09  |
| TIMM9   | 0.279266 | 1.11E-10  | 5.26E-10  |
| TIMP1   | 0.112554 | 1.06E-02  | 1.79E-02  |
| TIMP2   | 0.039371 | 3.73E-01  | 4.39E-01  |
| TIMP3   | -0.20503 | 2.71E-06  | 7.80E-06  |
| TIMP4   | 0.158573 | 3.03E-04  | 6.58E-04  |
| TINAGL1 | -0.01148 | 7.95E-01  | 8.31E-01  |
| TINAG   | 0.131533 | 2.78E-03  | 5.21E-03  |
| TINF2   | 0.077891 | 7.74E-02  | 1.10E-01  |
| TIPARP  | 0.064303 | 1.45E-01  | 1.92E-01  |
| TIPIN   | 0.575825 | 8.14E-47  | 5.10E-45  |
| TIPRL   | 0.256196 | 3.67E-09  | 1.47E-08  |
| TIRAP   | -0.15441 | 4.37E-04  | 9.26E-04  |
| TJAP1   | -0.06537 | 1.39E-01  | 1.84E-01  |
| TJP1    | -0.14065 | 1.37E-03  | 2.70E-03  |
| TJP2    | -0.12146 | 5.78E-03  | 1.03E-02  |
| TJP3    | -0.24108 | 3.03E-08  | 1.09E-07  |
| TK1     | 0.779126 | 4.03E-106 | 7.20E-104 |
| TK2     | -0.35429 | 1.12E-16  | 9.66E-16  |
| TKTL1   | 0.016788 | 7.04E-01  | 7.52E-01  |
| TKTL2   | 0.120923 | 6.00E-03  | 1.06E-02  |
| TKT     | -0.04642 | 2.93E-01  | 3.56E-01  |
| TLCD1   | 0.053562 | 2.25E-01  | 2.83E-01  |
| TLE1    | 0.135866 | 2.00E-03  | 3.83E-03  |
| TLE2    | -0.3703  | 3.50E-18  | 3.47E-17  |
| TLE3    | -0.09441 | 3.22E-02  | 4.94E-02  |
| TLE4    | -0.29465 | 8.95E-12  | 4.74E-11  |
| TLE6    | -0.16744 | 1.35E-04  | 3.08E-04  |
| TLK1    | 0.312807 | 3.74E-13  | 2.30E-12  |
| TLK2    | 0.257307 | 3.12E-09  | 1.26E-08  |
| TLL1    | -0.15907 | 2.90E-04  | 6.31E-04  |
| TLL2    | 0.164269 | 1.81E-04  | 4.06E-04  |
| TLN1    | -0.11951 | 6.62E-03  | 1.16E-02  |
| TLN2    | -0.09247 | 3.59E-02  | 5.46E-02  |
| TLR10   | -0.18475 | 2.46E-05  | 6.23E-05  |
| TLR1    | 0.055796 | 2.06E-01  | 2.62E-01  |
| TLR2    | -0.40361 | 1.35E-21  | 1.79E-20  |
| TLR3    | -0.21073 | 1.40E-06  | 4.17E-06  |
| TLR4    | -0.05284 | 2.31E-01  | 2.90E-01  |
| TLR5    | -0.56439 | 1.18E-44  | 6.78E-43  |
| TLR6    | 0.236397 | 5.67E-08  | 1.98E-07  |

|         |          |          |          |
|---------|----------|----------|----------|
| TLR7    | -0.18586 | 2.19E-05 | 5.60E-05 |
| TLR8    | -0.01044 | 8.13E-01 | 8.46E-01 |
| TLR9    | -0.0262  | 5.53E-01 | 6.15E-01 |
| TLX1NB  | 0.080678 | 6.73E-02 | 9.68E-02 |
| TLX1    | 0.155893 | 3.84E-04 | 8.21E-04 |
| TLX2    | 0.087739 | 4.66E-02 | 6.91E-02 |
| TLX3    | 0.222673 | 3.30E-07 | 1.07E-06 |
| TM2D1   | 0.038178 | 3.87E-01 | 4.54E-01 |
| TM2D2   | 0.114695 | 9.18E-03 | 1.57E-02 |
| TM2D3   | -0.14897 | 6.95E-04 | 1.43E-03 |
| TM4SF18 | -0.06935 | 1.16E-01 | 1.57E-01 |
| TM4SF19 | 0.312736 | 3.79E-13 | 2.32E-12 |
| TM4SF1  | -0.08434 | 5.58E-02 | 8.15E-02 |
| TM4SF20 | 0.206576 | 2.27E-06 | 6.59E-06 |
| TM4SF4  | -0.16369 | 1.91E-04 | 4.27E-04 |
| TM4SF5  | -0.00777 | 8.60E-01 | 8.86E-01 |
| TM6SF1  | -0.0792  | 7.25E-02 | 1.04E-01 |
| TM6SF2  | 0.137025 | 1.83E-03 | 3.52E-03 |
| TM7SF2  | -0.18685 | 1.98E-05 | 5.08E-05 |
| TM7SF3  | 0.037486 | 3.96E-01 | 4.63E-01 |
| TM7SF4  | -0.15116 | 5.78E-04 | 1.20E-03 |
| TM9SF1  | 0.027514 | 5.33E-01 | 5.96E-01 |
| TM9SF2  | -0.1448  | 9.83E-04 | 1.98E-03 |
| TM9SF3  | 0.014683 | 7.40E-01 | 7.83E-01 |
| TM9SF4  | 0.101928 | 2.07E-02 | 3.30E-02 |
| TMBIM1  | -0.13979 | 1.47E-03 | 2.88E-03 |
| TMBIM4  | -0.21553 | 7.91E-07 | 2.43E-06 |
| TMBIM6  | -0.02567 | 5.61E-01 | 6.22E-01 |
| TMC1    | -0.01912 | 6.65E-01 | 7.17E-01 |
| TMC2    | -0.1826  | 3.06E-05 | 7.66E-05 |
| TMC3    | -0.03997 | 3.65E-01 | 4.32E-01 |
| TMC4    | -0.38893 | 4.81E-20 | 5.65E-19 |
| TMC5    | -0.23063 | 1.21E-07 | 4.08E-07 |
| TMC6    | -0.12005 | 6.38E-03 | 1.12E-02 |
| TMC7    | -0.03662 | 4.07E-01 | 4.73E-01 |
| TMC8    | -0.16949 | 1.11E-04 | 2.57E-04 |
| TMCC1   | 0.066158 | 1.34E-01 | 1.79E-01 |
| TMCC2   | -0.14454 | 1.00E-03 | 2.02E-03 |
| TMCC3   | 0.084429 | 5.55E-02 | 8.11E-02 |
| TMCO1   | 0.00091  | 9.84E-01 | 9.87E-01 |
| TMCO2   | -0.0646  | 1.43E-01 | 1.90E-01 |
| TMCO3   | 0.019003 | 6.67E-01 | 7.18E-01 |
| TMCO4   | -0.25722 | 3.16E-09 | 1.28E-08 |
| TMCO5A  | -0.08106 | 6.60E-02 | 9.51E-02 |

|              |          |          |          |
|--------------|----------|----------|----------|
| TMCO6        | -0.09751 | 2.69E-02 | 4.19E-02 |
| TMCO7        | -0.11356 | 9.90E-03 | 1.68E-02 |
| TMED10P1     | 0.14429  | 1.02E-03 | 2.05E-03 |
| TMED10       | -0.04796 | 2.77E-01 | 3.39E-01 |
| TMED1        | 0.023591 | 5.93E-01 | 6.51E-01 |
| TMED2        | 0.358289 | 4.81E-17 | 4.32E-16 |
| TMED3        | -0.09762 | 2.67E-02 | 4.17E-02 |
| TMED4        | -0.09113 | 3.87E-02 | 5.84E-02 |
| TMED5        | 0.130491 | 3.01E-03 | 5.60E-03 |
| TMED6        | -0.32329 | 5.41E-14 | 3.60E-13 |
| TMED7-TICAM2 | 0.197069 | 6.62E-06 | 1.81E-05 |
| TMED7        | 0.075213 | 8.82E-02 | 1.23E-01 |
| TMED8        | -0.02906 | 5.11E-01 | 5.74E-01 |
| TMED9        | 0.006432 | 8.84E-01 | 9.06E-01 |
| TMEFF1       | 0.41486  | 7.67E-23 | 1.13E-21 |
| TMEFF2       | -0.11694 | 7.90E-03 | 1.36E-02 |
| TMEM100      | -0.35532 | 9.04E-17 | 7.87E-16 |
| TMEM101      | -0.09372 | 3.35E-02 | 5.12E-02 |
| TMEM102      | -0.17823 | 4.75E-05 | 1.16E-04 |
| TMEM104      | 0.12162  | 5.72E-03 | 1.02E-02 |
| TMEM105      | -0.34883 | 3.51E-16 | 2.87E-15 |
| TMEM106A     | 0.007846 | 8.59E-01 | 8.85E-01 |
| TMEM106B     | 0.173073 | 7.88E-05 | 1.86E-04 |
| TMEM106C     | 0.516156 | 2.09E-36 | 7.75E-35 |
| TMEM107      | -0.08935 | 4.27E-02 | 6.38E-02 |
| TMEM108      | -0.4359  | 2.68E-25 | 4.85E-24 |
| TMEM109      | -0.18294 | 2.96E-05 | 7.41E-05 |
| TMEM110      | -0.18129 | 3.50E-05 | 8.68E-05 |
| TMEM111      | -0.19    | 1.42E-05 | 3.72E-05 |
| TMEM114      | -0.09506 | 3.10E-02 | 4.77E-02 |
| TMEM115      | -0.323   | 5.71E-14 | 3.79E-13 |
| TMEM116      | -0.11085 | 1.18E-02 | 1.98E-02 |
| TMEM117      | 0.314458 | 2.77E-13 | 1.73E-12 |
| TMEM119      | -0.34461 | 8.33E-16 | 6.59E-15 |
| TMEM11       | 0.18446  | 2.53E-05 | 6.41E-05 |
| TMEM120A     | -0.15676 | 3.56E-04 | 7.65E-04 |
| TMEM120B     | 0.021515 | 6.26E-01 | 6.82E-01 |
| TMEM121      | 0.053064 | 2.29E-01 | 2.88E-01 |
| TMEM123      | 0.10088  | 2.20E-02 | 3.50E-02 |
| TMEM125      | -0.53935 | 3.31E-40 | 1.57E-38 |
| TMEM126A     | 0.215272 | 8.17E-07 | 2.50E-06 |
| TMEM126B     | 0.095497 | 3.02E-02 | 4.67E-02 |
| TMEM127      | 0.064978 | 1.41E-01 | 1.87E-01 |
| TMEM128      | -0.13577 | 2.02E-03 | 3.86E-03 |

|          |          |          |          |
|----------|----------|----------|----------|
| TMEM129  | -0.29309 | 1.16E-11 | 6.08E-11 |
| TMEM130  | -0.455   | 1.11E-27 | 2.43E-26 |
| TMEM131  | -0.03252 | 4.62E-01 | 5.27E-01 |
| TMEM132A | 0.36643  | 8.24E-18 | 7.89E-17 |
| TMEM132B | -0.12734 | 3.80E-03 | 6.95E-03 |
| TMEM132C | -0.50054 | 5.22E-34 | 1.70E-32 |
| TMEM132D | -0.43788 | 1.54E-25 | 2.85E-24 |
| TMEM132E | -0.49279 | 7.28E-33 | 2.23E-31 |
| TMEM133  | -0.35421 | 1.14E-16 | 9.82E-16 |
| TMEM134  | -0.17452 | 6.85E-05 | 1.63E-04 |
| TMEM135  | 0.207487 | 2.04E-06 | 5.96E-06 |
| TMEM136  | -0.07615 | 8.43E-02 | 1.18E-01 |
| TMEM138  | -0.01594 | 7.18E-01 | 7.65E-01 |
| TMEM139  | -0.11164 | 1.12E-02 | 1.89E-02 |
| TMEM140  | 0.139226 | 1.54E-03 | 3.00E-03 |
| TMEM141  | 0.047368 | 2.83E-01 | 3.46E-01 |
| TMEM143  | -0.23973 | 3.64E-08 | 1.30E-07 |
| TMEM144  | -0.02526 | 5.67E-01 | 6.27E-01 |
| TMEM145  | 0.256749 | 3.38E-09 | 1.36E-08 |
| TMEM146  | -0.25308 | 5.73E-09 | 2.25E-08 |
| TMEM147  | 0.208243 | 1.87E-06 | 5.49E-06 |
| TMEM149  | -0.03964 | 3.69E-01 | 4.36E-01 |
| TMEM14A  | 0.250946 | 7.76E-09 | 2.99E-08 |
| TMEM14B  | 0.214417 | 9.05E-07 | 2.75E-06 |
| TMEM14C  | 0.101286 | 2.15E-02 | 3.42E-02 |
| TMEM14E  | -0.01358 | 7.59E-01 | 7.99E-01 |
| TMEM150A | -0.38764 | 6.53E-20 | 7.55E-19 |
| TMEM150B | 0.067381 | 1.27E-01 | 1.70E-01 |
| TMEM150C | -0.01561 | 7.24E-01 | 7.70E-01 |
| TMEM151A | 0.008137 | 8.54E-01 | 8.81E-01 |
| TMEM151B | -0.18793 | 1.76E-05 | 4.58E-05 |
| TMEM154  | -0.16273 | 2.08E-04 | 4.65E-04 |
| TMEM155  | -0.16361 | 1.92E-04 | 4.30E-04 |
| TMEM156  | 0.173705 | 7.41E-05 | 1.76E-04 |
| TMEM158  | 0.354329 | 1.11E-16 | 9.59E-16 |
| TMEM159  | -0.25575 | 3.91E-09 | 1.56E-08 |
| TMEM160  | 0.039472 | 3.71E-01 | 4.38E-01 |
| TMEM161A | -0.04838 | 2.73E-01 | 3.35E-01 |
| TMEM161B | -0.04895 | 2.68E-01 | 3.29E-01 |
| TMEM163  | -0.56007 | 7.33E-44 | 4.07E-42 |
| TMEM164  | -0.19762 | 6.23E-06 | 1.71E-05 |
| TMEM165  | 0.150519 | 6.10E-04 | 1.27E-03 |
| TMEM167A | 0.008368 | 8.50E-01 | 8.77E-01 |
| TMEM167B | -0.1956  | 7.78E-06 | 2.11E-05 |

|                |          |          |          |
|----------------|----------|----------|----------|
| TMEM168        | -0.16065 | 2.52E-04 | 5.54E-04 |
| TMEM169        | 0.080381 | 6.84E-02 | 9.81E-02 |
| TMEM170A       | -0.00316 | 9.43E-01 | 9.55E-01 |
| TMEM170B       | -0.25547 | 4.07E-09 | 1.62E-08 |
| TMEM171        | 0.329576 | 1.63E-14 | 1.14E-13 |
| TMEM173        | -0.4628  | 1.07E-28 | 2.50E-27 |
| TMEM174        | 0.074791 | 9.00E-02 | 1.25E-01 |
| TMEM175        | -0.32573 | 3.41E-14 | 2.31E-13 |
| TMEM176A       | -0.05943 | 1.78E-01 | 2.30E-01 |
| TMEM176B       | -0.06187 | 1.61E-01 | 2.10E-01 |
| TMEM177        | 0.170143 | 1.04E-04 | 2.43E-04 |
| TMEM178        | -0.0959  | 2.96E-02 | 4.57E-02 |
| TMEM179B       | -0.1514  | 5.66E-04 | 1.18E-03 |
| TMEM179        | 0.149365 | 6.73E-04 | 1.39E-03 |
| TMEM17         | 0.018932 | 6.68E-01 | 7.20E-01 |
| TMEM180        | -0.12391 | 4.86E-03 | 8.75E-03 |
| TMEM181        | -0.13782 | 1.72E-03 | 3.33E-03 |
| TMEM182        | 0.299655 | 3.81E-12 | 2.11E-11 |
| TMEM183A       | 0.14473  | 9.88E-04 | 1.99E-03 |
| TMEM184A       | 0.047799 | 2.79E-01 | 3.41E-01 |
| TMEM184B       | 0.031863 | 4.71E-01 | 5.36E-01 |
| TMEM184C       | 0.148909 | 6.99E-04 | 1.44E-03 |
| TMEM185A       | 0.04322  | 3.28E-01 | 3.93E-01 |
| TMEM185B       | 0.440091 | 8.29E-26 | 1.57E-24 |
| TMEM186        | -0.05531 | 2.10E-01 | 2.66E-01 |
| TMEM187        | -0.14183 | 1.25E-03 | 2.48E-03 |
| TMEM188        | 0.033392 | 4.50E-01 | 5.16E-01 |
| TMEM189-UBE2V1 | 0.145284 | 9.44E-04 | 1.90E-03 |
| TMEM189        | 0.331434 | 1.14E-14 | 8.06E-14 |
| TMEM18         | 0.092711 | 3.54E-02 | 5.39E-02 |
| TMEM190        | -0.26672 | 7.76E-10 | 3.36E-09 |
| TMEM191A       | -0.0766  | 8.25E-02 | 1.16E-01 |
| TMEM192        | -0.11134 | 1.15E-02 | 1.93E-02 |
| TMEM194A       | 0.553461 | 1.15E-42 | 6.03E-41 |
| TMEM194B       | 0.44277  | 3.88E-26 | 7.55E-25 |
| TMEM195        | 0.160356 | 2.58E-04 | 5.67E-04 |
| TMEM196        | 0.131717 | 2.75E-03 | 5.14E-03 |
| TMEM198        | 0.016626 | 7.07E-01 | 7.54E-01 |
| TMEM199        | 0.336311 | 4.39E-15 | 3.24E-14 |
| TMEM19         | 0.158005 | 3.19E-04 | 6.90E-04 |
| TMEM200A       | -0.04124 | 3.50E-01 | 4.16E-01 |
| TMEM200B       | 0.174478 | 6.88E-05 | 1.64E-04 |
| TMEM200C       | 0.10201  | 2.06E-02 | 3.29E-02 |
| TMEM201        | 0.19274  | 1.06E-05 | 2.82E-05 |

|          |          |          |          |
|----------|----------|----------|----------|
| TMEM202  | 0.05704  | 1.96E-01 | 2.51E-01 |
| TMEM203  | 0.118019 | 7.34E-03 | 1.28E-02 |
| TMEM204  | -0.36289 | 1.78E-17 | 1.67E-16 |
| TMEM205  | -0.19966 | 4.97E-06 | 1.39E-05 |
| TMEM206  | 0.550191 | 4.36E-42 | 2.23E-40 |
| TMEM207  | 0.058867 | 1.82E-01 | 2.35E-01 |
| TMEM208  | -0.00425 | 9.23E-01 | 9.39E-01 |
| TMEM209  | 0.279733 | 1.03E-10 | 4.90E-10 |
| TMEM20   | -0.04072 | 3.56E-01 | 4.22E-01 |
| TMEM211  | -0.0576  | 1.92E-01 | 2.46E-01 |
| TMEM212  | -0.27013 | 4.62E-10 | 2.06E-09 |
| TMEM213  | -0.26256 | 1.44E-09 | 6.06E-09 |
| TMEM214  | 0.050443 | 2.53E-01 | 3.14E-01 |
| TMEM215  | 0.062655 | 1.56E-01 | 2.04E-01 |
| TMEM216  | 0.108678 | 1.36E-02 | 2.25E-02 |
| TMEM217  | -0.1214  | 5.80E-03 | 1.03E-02 |
| TMEM218  | -0.03151 | 4.75E-01 | 5.41E-01 |
| TMEM219  | -0.24479 | 1.83E-08 | 6.77E-08 |
| TMEM220  | -0.3748  | 1.27E-18 | 1.31E-17 |
| TMEM222  | -0.2677  | 6.68E-10 | 2.92E-09 |
| TMEM223  | 0.199502 | 5.06E-06 | 1.41E-05 |
| TMEM229A | -0.14177 | 1.26E-03 | 2.49E-03 |
| TMEM229B | 0.044555 | 3.13E-01 | 3.77E-01 |
| TMEM22   | 0.338056 | 3.11E-15 | 2.31E-14 |
| TMEM231  | -0.23945 | 3.78E-08 | 1.35E-07 |
| TMEM232  | -0.3531  | 1.44E-16 | 1.23E-15 |
| TMEM233  | -0.10508 | 1.71E-02 | 2.77E-02 |
| TMEM25   | -0.23333 | 8.49E-08 | 2.92E-07 |
| TMEM26   | 0.235844 | 6.10E-08 | 2.13E-07 |
| TMEM27   | -0.27525 | 2.09E-10 | 9.68E-10 |
| TMEM2    | 0.077635 | 7.84E-02 | 1.11E-01 |
| TMEM30A  | -0.07722 | 8.00E-02 | 1.13E-01 |
| TMEM30B  | -0.15341 | 4.76E-04 | 1.00E-03 |
| TMEM30C  | 0.031542 | 4.75E-01 | 5.41E-01 |
| TMEM31   | -0.00606 | 8.91E-01 | 9.12E-01 |
| TMEM33   | 0.173183 | 7.80E-05 | 1.85E-04 |
| TMEM35   | -0.15664 | 3.60E-04 | 7.73E-04 |
| TMEM37   | -0.33905 | 2.55E-15 | 1.91E-14 |
| TMEM38A  | 0.068744 | 1.19E-01 | 1.61E-01 |
| TMEM38B  | 0.514133 | 4.34E-36 | 1.59E-34 |
| TMEM39A  | 0.283718 | 5.45E-11 | 2.65E-10 |
| TMEM39B  | -0.03083 | 4.85E-01 | 5.50E-01 |
| TMEM40   | 0.185204 | 2.34E-05 | 5.97E-05 |
| TMEM41A  | 0.21708  | 6.57E-07 | 2.04E-06 |

|         |          |          |          |
|---------|----------|----------|----------|
| TMEM41B | -0.23687 | 5.33E-08 | 1.87E-07 |
| TMEM42  | -0.16418 | 1.82E-04 | 4.10E-04 |
| TMEM43  | -0.31356 | 3.27E-13 | 2.02E-12 |
| TMEM44  | 0.199421 | 5.10E-06 | 1.42E-05 |
| TMEM45A | 0.217969 | 5.89E-07 | 1.84E-06 |
| TMEM45B | 0.022777 | 6.06E-01 | 6.63E-01 |
| TMEM47  | -0.22397 | 2.81E-07 | 9.13E-07 |
| TMEM48  | 0.628666 | 5.33E-58 | 4.42E-56 |
| TMEM49  | 0.246157 | 1.51E-08 | 5.65E-08 |
| TMEM50A | -0.09334 | 3.42E-02 | 5.22E-02 |
| TMEM50B | -0.4018  | 2.11E-21 | 2.77E-20 |
| TMEM51  | 0.206453 | 2.30E-06 | 6.67E-06 |
| TMEM52  | -0.04451 | 3.13E-01 | 3.78E-01 |
| TMEM53  | -0.13545 | 2.07E-03 | 3.95E-03 |
| TMEM54  | -0.06535 | 1.39E-01 | 1.84E-01 |
| TMEM55A | 0.211448 | 1.29E-06 | 3.84E-06 |
| TMEM55B | 0.09247  | 3.59E-02 | 5.46E-02 |
| TMEM56  | -0.12709 | 3.87E-03 | 7.07E-03 |
| TMEM57  | -0.34748 | 4.63E-16 | 3.75E-15 |
| TMEM59L | -0.29526 | 8.08E-12 | 4.30E-11 |
| TMEM59  | -0.35682 | 6.57E-17 | 5.80E-16 |
| TMEM5   | 0.317467 | 1.60E-13 | 1.02E-12 |
| TMEM60  | 0.038519 | 3.83E-01 | 4.49E-01 |
| TMEM61  | 0.042519 | 3.36E-01 | 4.01E-01 |
| TMEM62  | -0.06579 | 1.36E-01 | 1.81E-01 |
| TMEM63A | -0.44159 | 5.42E-26 | 1.04E-24 |
| TMEM63B | -0.39186 | 2.39E-20 | 2.88E-19 |
| TMEM63C | -0.1024  | 2.01E-02 | 3.22E-02 |
| TMEM64  | -0.0056  | 8.99E-01 | 9.19E-01 |
| TMEM65  | 0.352298 | 1.71E-16 | 1.44E-15 |
| TMEM66  | -0.35998 | 3.35E-17 | 3.06E-16 |
| TMEM67  | -0.05476 | 2.15E-01 | 2.71E-01 |
| TMEM68  | 0.077588 | 7.86E-02 | 1.11E-01 |
| TMEM69  | 0.2913   | 1.57E-11 | 8.09E-11 |
| TMEM70  | 0.165135 | 1.67E-04 | 3.77E-04 |
| TMEM71  | -0.10703 | 1.51E-02 | 2.48E-02 |
| TMEM72  | -0.07346 | 9.58E-02 | 1.33E-01 |
| TMEM74  | 0.222784 | 3.26E-07 | 1.05E-06 |
| TMEM79  | 0.255111 | 4.29E-09 | 1.71E-08 |
| TMEM80  | -0.43614 | 2.51E-25 | 4.56E-24 |
| TMEM81  | -0.04933 | 2.64E-01 | 3.25E-01 |
| TMEM82  | 0.070248 | 1.11E-01 | 1.52E-01 |
| TMEM84  | -0.01843 | 6.77E-01 | 7.27E-01 |
| TMEM85  | 0.139177 | 1.54E-03 | 3.01E-03 |

|             |          |          |          |
|-------------|----------|----------|----------|
| TMEM86A     | -0.00547 | 9.01E-01 | 9.20E-01 |
| TMEM86B     | 0.022729 | 6.07E-01 | 6.64E-01 |
| TMEM87A     | -0.35566 | 8.42E-17 | 7.33E-16 |
| TMEM87B     | 0.101014 | 2.19E-02 | 3.47E-02 |
| TMEM88B     | -0.0807  | 6.72E-02 | 9.67E-02 |
| TMEM88      | -0.32747 | 2.44E-14 | 1.68E-13 |
| TMEM89      | -0.08305 | 5.97E-02 | 8.66E-02 |
| TMEM8A      | -0.08749 | 4.72E-02 | 6.99E-02 |
| TMEM8B      | -0.47582 | 1.87E-30 | 4.93E-29 |
| TMEM8C      | -0.11986 | 6.46E-03 | 1.14E-02 |
| TMEM90A     | -0.33316 | 8.16E-15 | 5.83E-14 |
| TMEM90B     | 0.055805 | 2.06E-01 | 2.62E-01 |
| TMEM91      | -0.476   | 1.76E-30 | 4.67E-29 |
| TMEM92      | -0.20682 | 2.21E-06 | 6.42E-06 |
| TMEM93      | 0.197164 | 6.55E-06 | 1.80E-05 |
| TMEM95      | 0.020536 | 6.42E-01 | 6.96E-01 |
| TMEM97      | 0.135151 | 2.11E-03 | 4.03E-03 |
| TMEM98      | -0.33289 | 8.59E-15 | 6.14E-14 |
| TMEM99      | -0.05422 | 2.19E-01 | 2.77E-01 |
| TMEM9B      | -0.38412 | 1.49E-19 | 1.68E-18 |
| TMEM9       | -0.21094 | 1.37E-06 | 4.07E-06 |
| TMF1        | -0.09896 | 2.47E-02 | 3.89E-02 |
| TMIE        | 0.069066 | 1.17E-01 | 1.59E-01 |
| TMIGD1      | 0.029558 | 5.03E-01 | 5.68E-01 |
| TMIGD2      | 0.055172 | 2.11E-01 | 2.67E-01 |
| TMLHE       | 0.284322 | 4.94E-11 | 2.41E-10 |
| TMOD1       | -0.14519 | 9.52E-04 | 1.92E-03 |
| TMOD2       | -0.0768  | 8.17E-02 | 1.15E-01 |
| TMOD3       | 0.14233  | 1.20E-03 | 2.38E-03 |
| TMOD4       | -0.17207 | 8.68E-05 | 2.04E-04 |
| TMPO        | 0.689484 | 7.01E-74 | 7.79E-72 |
| TMPPE       | -0.0257  | 5.61E-01 | 6.21E-01 |
| TMPRSS11A   | 0.073996 | 9.35E-02 | 1.30E-01 |
| TMPRSS11BNL | 0.03622  | 4.12E-01 | 4.78E-01 |
| TMPRSS11B   | 0.077834 | 7.76E-02 | 1.10E-01 |
| TMPRSS11D   | 0.102966 | 1.94E-02 | 3.12E-02 |
| TMPRSS11F   | 0.164051 | 1.85E-04 | 4.14E-04 |
| TMPRSS12    | -0.03749 | 3.96E-01 | 4.62E-01 |
| TMPRSS13    | -0.08737 | 4.75E-02 | 7.04E-02 |
| TMPRSS15    | 0.144648 | 9.95E-04 | 2.00E-03 |
| TMPRSS2     | -0.5677  | 2.84E-45 | 1.67E-43 |
| TMPRSS3     | -0.03554 | 4.21E-01 | 4.87E-01 |
| TMPRSS4     | -0.14428 | 1.03E-03 | 2.06E-03 |
| TMPRSS5     | -0.08215 | 6.25E-02 | 9.04E-02 |



|           |          |          |          |
|-----------|----------|----------|----------|
| TMPRSS6   | -0.17471 | 6.72E-05 | 1.61E-04 |
| TMPRSS7   | -0.17806 | 4.84E-05 | 1.18E-04 |
| TMPRSS9   | 0.081035 | 6.61E-02 | 9.52E-02 |
| TMSB10    | 0.327167 | 2.59E-14 | 1.77E-13 |
| TMSB15A   | 0.172153 | 8.61E-05 | 2.03E-04 |
| TMSB15B   | 0.170415 | 1.02E-04 | 2.37E-04 |
| TMSB4Y    | -0.0074  | 8.67E-01 | 8.92E-01 |
| TMSL3     | -0.1064  | 1.57E-02 | 2.57E-02 |
| TMTC1     | -0.06721 | 1.28E-01 | 1.71E-01 |
| TMTC2     | -0.08726 | 4.78E-02 | 7.07E-02 |
| TMTC3     | 0.481316 | 3.20E-31 | 8.88E-30 |
| TMTC4     | -0.0683  | 1.22E-01 | 1.64E-01 |
| TMUB1     | 0.115897 | 8.47E-03 | 1.45E-02 |
| TMUB2     | -0.01172 | 7.91E-01 | 8.27E-01 |
| TMX1      | 0.326107 | 3.17E-14 | 2.15E-13 |
| TMX2      | 0.19693  | 6.72E-06 | 1.84E-05 |
| TMX3      | -0.03074 | 4.86E-01 | 5.51E-01 |
| TMX4      | -0.26925 | 5.29E-10 | 2.33E-09 |
| TNC       | 0.15945  | 2.80E-04 | 6.12E-04 |
| TNFAIP1   | 0.186889 | 1.97E-05 | 5.07E-05 |
| TNFAIP2   | 0.147762 | 7.69E-04 | 1.57E-03 |
| TNFAIP3   | 0.114801 | 9.12E-03 | 1.56E-02 |
| TNFAIP6   | 0.342559 | 1.26E-15 | 9.75E-15 |
| TNFAIP8L1 | 0.119446 | 6.65E-03 | 1.17E-02 |
| TNFAIP8L2 | -0.13296 | 2.50E-03 | 4.71E-03 |
| TNFAIP8L3 | -0.11286 | 1.04E-02 | 1.76E-02 |
| TNFAIP8   | 0.013545 | 7.59E-01 | 7.99E-01 |
| TNFRSF10A | 0.04803  | 2.77E-01 | 3.39E-01 |
| TNFRSF10B | -0.03571 | 4.19E-01 | 4.85E-01 |
| TNFRSF10C | -0.33101 | 1.24E-14 | 8.71E-14 |
| TNFRSF10D | -0.07019 | 1.12E-01 | 1.52E-01 |
| TNFRSF11A | -0.0009  | 9.84E-01 | 9.87E-01 |
| TNFRSF11B | 0.043984 | 3.19E-01 | 3.84E-01 |
| TNFRSF12A | 0.060908 | 1.68E-01 | 2.18E-01 |
| TNFRSF13B | -0.31123 | 4.97E-13 | 3.02E-12 |
| TNFRSF13C | -0.02724 | 5.37E-01 | 6.00E-01 |
| TNFRSF14  | -0.29649 | 6.56E-12 | 3.53E-11 |
| TNFRSF17  | -0.11991 | 6.44E-03 | 1.13E-02 |
| TNFRSF18  | 0.161335 | 2.36E-04 | 5.23E-04 |
| TNFRSF19  | -0.29889 | 4.35E-12 | 2.39E-11 |
| TNFRSF1A  | 0.020915 | 6.36E-01 | 6.91E-01 |
| TNFRSF1B  | -0.16989 | 1.07E-04 | 2.48E-04 |
| TNFRSF21  | 0.193098 | 1.02E-05 | 2.72E-05 |
| TNFRSF25  | 0.006639 | 8.81E-01 | 9.03E-01 |

|                 |          |          |          |
|-----------------|----------|----------|----------|
| TNFRSF4         | 0.030304 | 4.93E-01 | 5.57E-01 |
| TNFRSF6B        | 0.10836  | 1.39E-02 | 2.30E-02 |
| TNFRSF8         | 0.039851 | 3.67E-01 | 4.33E-01 |
| TNFRSF9         | 0.283158 | 5.96E-11 | 2.89E-10 |
| TNFSF10         | -0.06213 | 1.59E-01 | 2.08E-01 |
| TNFSF11         | 0.184108 | 2.62E-05 | 6.63E-05 |
| TNFSF12-TNFSF13 | -0.13915 | 1.55E-03 | 3.01E-03 |
| TNFSF12         | -0.44483 | 2.16E-26 | 4.24E-25 |
| TNFSF13B        | 0.097144 | 2.75E-02 | 4.27E-02 |
| TNFSF13         | -0.46867 | 1.76E-29 | 4.38E-28 |
| TNFSF14         | -0.20059 | 4.48E-06 | 1.26E-05 |
| TNFSF15         | -0.29569 | 7.51E-12 | 4.01E-11 |
| TNFSF18         | -0.02739 | 5.35E-01 | 5.98E-01 |
| TNFSF4          | 0.278673 | 1.22E-10 | 5.76E-10 |
| TNFSF8          | -0.09219 | 3.65E-02 | 5.53E-02 |
| TNFSF9          | 0.022952 | 6.03E-01 | 6.60E-01 |
| TNF             | -0.01975 | 6.55E-01 | 7.08E-01 |
| TNIK            | -0.19618 | 7.29E-06 | 1.99E-05 |
| TNIP1           | -0.09273 | 3.54E-02 | 5.39E-02 |
| TNIP2           | 0.14444  | 1.01E-03 | 2.03E-03 |
| TNIP3           | 0.176974 | 5.38E-05 | 1.30E-04 |
| TNK1            | -0.26045 | 1.97E-09 | 8.15E-09 |
| TNK2            | -0.18756 | 1.83E-05 | 4.74E-05 |
| TNKS1BP1        | -0.33348 | 7.66E-15 | 5.49E-14 |
| TNKS2           | -0.07758 | 7.86E-02 | 1.11E-01 |
| TNKS            | -0.11529 | 8.83E-03 | 1.51E-02 |
| TNMD            | -0.02173 | 6.23E-01 | 6.79E-01 |
| TNNC1           | -0.35742 | 5.78E-17 | 5.15E-16 |
| TNNC2           | -0.04848 | 2.72E-01 | 3.34E-01 |
| TNNI1           | -0.17457 | 6.82E-05 | 1.63E-04 |
| TNNI2           | -0.12247 | 5.39E-03 | 9.61E-03 |
| TNNI3K          | -0.4249  | 5.43E-24 | 8.88E-23 |
| TNNI3           | 0.157013 | 3.48E-04 | 7.49E-04 |
| TNNT1           | 0.407577 | 4.96E-22 | 6.85E-21 |
| TNNT2           | -0.20403 | 3.04E-06 | 8.70E-06 |
| TNNT3           | -0.23359 | 8.21E-08 | 2.83E-07 |
| TNN             | -0.38362 | 1.68E-19 | 1.88E-18 |
| TNP1            | 0.1309   | 2.92E-03 | 5.44E-03 |
| TNP2            | -0.00873 | 8.43E-01 | 8.72E-01 |
| TNPO1           | 0.285673 | 3.97E-11 | 1.95E-10 |
| TNPO2           | 0.132052 | 2.68E-03 | 5.02E-03 |
| TNPO3           | 0.354256 | 1.13E-16 | 9.73E-16 |
| TNRC18          | -0.21487 | 8.57E-07 | 2.62E-06 |
| TNRC6A          | -0.22415 | 2.75E-07 | 8.95E-07 |

|          |          |           |           |
|----------|----------|-----------|-----------|
| TNRC6B   | -0.21823 | 5.71E-07  | 1.79E-06  |
| TNRC6C   | -0.35137 | 2.07E-16  | 1.74E-15  |
| TNR      | -0.26106 | 1.80E-09  | 7.49E-09  |
| TNS1     | -0.58568 | 9.55E-49  | 6.26E-47  |
| TNS3     | -0.01411 | 7.49E-01  | 7.91E-01  |
| TNS4     | 0.144028 | 1.05E-03  | 2.10E-03  |
| TNXB     | -0.50855 | 3.19E-35  | 1.11E-33  |
| TOB1     | -0.37699 | 7.75E-19  | 8.11E-18  |
| TOB2     | -0.34359 | 1.02E-15  | 8.01E-15  |
| TOE1     | 0.066723 | 1.30E-01  | 1.75E-01  |
| TOLLIP   | -0.30034 | 3.39E-12  | 1.89E-11  |
| TOM1L1   | 0.007666 | 8.62E-01  | 8.87E-01  |
| TOM1L2   | -0.52674 | 4.19E-38  | 1.72E-36  |
| TOM1     | -0.31044 | 5.73E-13  | 3.45E-12  |
| TOMM20L  | 0.037094 | 4.01E-01  | 4.67E-01  |
| TOMM20   | -0.06153 | 1.63E-01  | 2.13E-01  |
| TOMM22   | 0.260568 | 1.94E-09  | 8.02E-09  |
| TOMM34   | 0.212121 | 1.19E-06  | 3.57E-06  |
| TOMM40L  | 0.232536 | 9.42E-08  | 3.22E-07  |
| TOMM40   | 0.477945 | 9.46E-31  | 2.57E-29  |
| TOMM5    | 0.458847 | 3.52E-28  | 7.95E-27  |
| TOMM6    | -0.00449 | 9.19E-01  | 9.35E-01  |
| TOMM70A  | 0.442059 | 4.75E-26  | 9.18E-25  |
| TOMM7    | -0.08413 | 5.64E-02  | 8.23E-02  |
| TOP1MT   | -0.04177 | 3.44E-01  | 4.10E-01  |
| TOP1P1   | 0.109754 | 1.27E-02  | 2.12E-02  |
| TOP1P2   | 0.035025 | 4.28E-01  | 4.94E-01  |
| TOP1     | 0.19498  | 8.32E-06  | 2.25E-05  |
| TOP2A    | 0.86454  | 2.09E-155 | 1.49E-152 |
| TOP2B    | -0.17641 | 5.69E-05  | 1.37E-04  |
| TOP3A    | 0.25201  | 6.67E-09  | 2.60E-08  |
| TOP3B    | -0.00074 | 9.87E-01  | 9.90E-01  |
| TOPBP1   | 0.617004 | 2.39E-55  | 1.82E-53  |
| TOPORS   | -0.01514 | 7.32E-01  | 7.76E-01  |
| TOR1AIP1 | -0.20672 | 2.23E-06  | 6.48E-06  |
| TOR1AIP2 | -0.00528 | 9.05E-01  | 9.23E-01  |
| TOR1A    | 0.187598 | 1.83E-05  | 4.73E-05  |
| TOR1B    | 0.155264 | 4.06E-04  | 8.64E-04  |
| TOR2A    | -0.05148 | 2.44E-01  | 3.03E-01  |
| TOR3A    | 0.151499 | 5.61E-04  | 1.17E-03  |
| TOX2     | -0.06138 | 1.64E-01  | 2.14E-01  |
| TOX3     | -0.17205 | 8.70E-05  | 2.04E-04  |
| TOX4     | 0.059161 | 1.80E-01  | 2.33E-01  |
| TOX      | -0.28893 | 2.32E-11  | 1.18E-10  |

|          |          |          |          |
|----------|----------|----------|----------|
| TP53AIP1 | -0.02996 | 4.98E-01 | 5.62E-01 |
| TP53BP1  | 0.079345 | 7.20E-02 | 1.03E-01 |
| TP53BP2  | 0.055607 | 2.08E-01 | 2.63E-01 |
| TP53I11  | -0.24013 | 3.45E-08 | 1.24E-07 |
| TP53I13  | -0.0451  | 3.07E-01 | 3.71E-01 |
| TP53I3   | 0.170786 | 9.82E-05 | 2.29E-04 |
| TP53INP1 | -0.34899 | 3.39E-16 | 2.78E-15 |
| TP53INP2 | 0.123083 | 5.16E-03 | 9.23E-03 |
| TP53RK   | 0.069158 | 1.17E-01 | 1.58E-01 |
| TP53TG1  | -0.10386 | 1.84E-02 | 2.97E-02 |
| TP53TG3B | 0.138095 | 1.68E-03 | 3.26E-03 |
| TP53TG5  | -0.01069 | 8.09E-01 | 8.42E-01 |
| TP53     | -0.17964 | 4.13E-05 | 1.02E-04 |
| TP63     | -0.0835  | 5.83E-02 | 8.48E-02 |
| TP73     | -0.01717 | 6.97E-01 | 7.46E-01 |
| TPBG     | 0.268617 | 5.82E-10 | 2.56E-09 |
| TPCN1    | -0.0877  | 4.67E-02 | 6.92E-02 |
| TPCN2    | 0.117227 | 7.74E-03 | 1.34E-02 |
| TPD52L1  | 0.060452 | 1.71E-01 | 2.22E-01 |
| TPD52L2  | 0.233487 | 8.32E-08 | 2.86E-07 |
| TPD52L3  | -0.06357 | 1.50E-01 | 1.97E-01 |
| TPD52    | 0.181952 | 3.27E-05 | 8.14E-05 |
| TPH1     | -0.03394 | 4.42E-01 | 5.08E-01 |
| TPH2     | 0.160922 | 2.45E-04 | 5.41E-04 |
| TPI1P2   | 0.356302 | 7.34E-17 | 6.44E-16 |
| TPI1P3   | 0.246539 | 1.44E-08 | 5.37E-08 |
| TPI1     | 0.566626 | 4.52E-45 | 2.65E-43 |
| TPK1     | -0.18921 | 1.54E-05 | 4.03E-05 |
| TPM1     | 0.017985 | 6.84E-01 | 7.34E-01 |
| TPM2     | 0.021149 | 6.32E-01 | 6.87E-01 |
| TPM3     | 0.499457 | 7.58E-34 | 2.45E-32 |
| TPM4     | 0.288896 | 2.34E-11 | 1.19E-10 |
| TPMT     | -0.00818 | 8.53E-01 | 8.80E-01 |
| TPO      | 0.028087 | 5.25E-01 | 5.88E-01 |
| TPP1     | -0.21823 | 5.71E-07 | 1.79E-06 |
| TPP2     | -0.15468 | 4.27E-04 | 9.05E-04 |
| TPPP2    | -0.16776 | 1.31E-04 | 3.00E-04 |
| TPPP3    | -0.42233 | 1.08E-23 | 1.72E-22 |
| TPPP     | -0.54179 | 1.27E-40 | 6.06E-39 |
| TPRA1    | -0.06847 | 1.21E-01 | 1.63E-01 |
| TPRG1L   | -0.38009 | 3.80E-19 | 4.10E-18 |
| TPRG1    | -0.19496 | 8.34E-06 | 2.26E-05 |
| TPRKB    | 0.551565 | 2.49E-42 | 1.29E-40 |
| TPRN     | -0.00474 | 9.15E-01 | 9.32E-01 |

|           |          |           |           |
|-----------|----------|-----------|-----------|
| TPRX1     | 0.067467 | 1.26E-01  | 1.70E-01  |
| TPRXL     | 0.040203 | 3.63E-01  | 4.29E-01  |
| TPR       | -0.01454 | 7.42E-01  | 7.85E-01  |
| TPSAB1    | -0.33474 | 5.99E-15  | 4.35E-14  |
| TPSB2     | -0.35605 | 7.74E-17  | 6.77E-16  |
| TPSD1     | -0.22008 | 4.55E-07  | 1.44E-06  |
| TPSG1     | -0.16078 | 2.49E-04  | 5.47E-04  |
| TPST1     | 0.117173 | 7.77E-03  | 1.34E-02  |
| TPST2     | -0.02715 | 5.39E-01  | 6.01E-01  |
| TPT1      | -0.23653 | 5.57E-08  | 1.95E-07  |
| TPTE2P1   | -0.14352 | 1.09E-03  | 2.18E-03  |
| TPTE2P3   | -0.00047 | 9.91E-01  | 9.94E-01  |
| TPTE2     | 0.031515 | 4.75E-01  | 5.41E-01  |
| TPTE      | 0.201581 | 4.01E-06  | 1.13E-05  |
| TPX2      | 0.882814 | 1.80E-170 | 3.00E-167 |
| TRA2A     | -0.08223 | 6.22E-02  | 9.01E-02  |
| TRA2B     | 0.433959 | 4.60E-25  | 8.14E-24  |
| TRABD     | -0.08184 | 6.35E-02  | 9.18E-02  |
| TRADD     | -0.34397 | 9.48E-16  | 7.44E-15  |
| TRAF1     | -0.11698 | 7.87E-03  | 1.36E-02  |
| TRAF2     | 0.041039 | 3.53E-01  | 4.19E-01  |
| TRAF3IP1  | -0.09365 | 3.36E-02  | 5.14E-02  |
| TRAF3IP2  | -0.10438 | 1.78E-02  | 2.88E-02  |
| TRAF3IP3  | -0.15485 | 4.20E-04  | 8.93E-04  |
| TRAF3     | 0.139566 | 1.50E-03  | 2.93E-03  |
| TRAF4     | 0.174359 | 6.96E-05  | 1.66E-04  |
| TRAF5     | -0.02405 | 5.86E-01  | 6.45E-01  |
| TRAF6     | -0.20029 | 4.63E-06  | 1.30E-05  |
| TRAF7     | 0.097673 | 2.67E-02  | 4.16E-02  |
| TRAFD1    | 0.057282 | 1.94E-01  | 2.49E-01  |
| TRAIIP    | 0.673406 | 2.60E-69  | 2.69E-67  |
| TRAK1     | -0.19708 | 6.61E-06  | 1.81E-05  |
| TRAK2     | -0.28711 | 3.13E-11  | 1.56E-10  |
| TRAM1L1   | 0.012606 | 7.75E-01  | 8.13E-01  |
| TRAM1     | -0.15798 | 3.19E-04  | 6.91E-04  |
| TRAM2     | 0.064819 | 1.42E-01  | 1.88E-01  |
| TRANK1    | -0.28505 | 4.39E-11  | 2.15E-10  |
| TRAP1     | 0.090507 | 4.01E-02  | 6.03E-02  |
| TRAPPC10  | -0.1296  | 3.22E-03  | 5.96E-03  |
| TRAPPC1   | -0.20911 | 1.69E-06  | 4.99E-06  |
| TRAPPC2L  | -0.02983 | 4.99E-01  | 5.64E-01  |
| TRAPPC2P1 | 0.071386 | 1.06E-01  | 1.45E-01  |
| TRAPPC2   | -0.17354 | 7.53E-05  | 1.79E-04  |
| TRAPPC3   | 0.040546 | 3.58E-01  | 4.25E-01  |

|          |          |          |          |
|----------|----------|----------|----------|
| TRAPPC4  | -0.09401 | 3.29E-02 | 5.04E-02 |
| TRAPPC5  | 0.051563 | 2.43E-01 | 3.03E-01 |
| TRAPPC6A | -0.21008 | 1.51E-06 | 4.48E-06 |
| TRAPPC6B | 0.030785 | 4.86E-01 | 5.51E-01 |
| TRAPPC9  | -0.10405 | 1.82E-02 | 2.94E-02 |
| TRAT1    | -0.07034 | 1.11E-01 | 1.51E-01 |
| TRDMT1   | -0.19726 | 6.48E-06 | 1.78E-05 |
| TRDN     | 0.18466  | 2.48E-05 | 6.29E-05 |
| TREH     | -0.22569 | 2.26E-07 | 7.43E-07 |
| TREM1    | -0.0703  | 1.11E-01 | 1.51E-01 |
| TREM2    | -0.15111 | 5.80E-04 | 1.21E-03 |
| TREML1   | -0.28037 | 9.33E-11 | 4.44E-10 |
| TREML2P1 | -0.01471 | 7.39E-01 | 7.83E-01 |
| TREML2   | -0.12005 | 6.38E-03 | 1.12E-02 |
| TREML3   | 0.305625 | 1.35E-12 | 7.81E-12 |
| TREML4   | 0.135351 | 2.08E-03 | 3.98E-03 |
| TRERF1   | 0.200478 | 4.54E-06 | 1.27E-05 |
| TREX1    | -0.18841 | 1.68E-05 | 4.36E-05 |
| TREX2    | -0.14983 | 6.47E-04 | 1.34E-03 |
| TRHDE    | -0.18799 | 1.75E-05 | 4.55E-05 |
| TRHR     | 0.098848 | 2.49E-02 | 3.91E-02 |
| TRH      | -0.01419 | 7.48E-01 | 7.90E-01 |
| TRIAP1   | 0.338048 | 3.11E-15 | 2.32E-14 |
| TRIB1    | -0.09665 | 2.83E-02 | 4.39E-02 |
| TRIB2    | -0.00019 | 9.97E-01 | 9.97E-01 |
| TRIB3    | 0.40422  | 1.15E-21 | 1.54E-20 |
| TRIL     | -0.08455 | 5.52E-02 | 8.06E-02 |
| TRIM10   | 0.208806 | 1.75E-06 | 5.16E-06 |
| TRIM11   | -0.04941 | 2.63E-01 | 3.24E-01 |
| TRIM13   | -0.42434 | 6.31E-24 | 1.03E-22 |
| TRIM14   | 0.030389 | 4.91E-01 | 5.56E-01 |
| TRIM15   | 0.288108 | 2.66E-11 | 1.34E-10 |
| TRIM16L  | 0.194385 | 8.87E-06 | 2.39E-05 |
| TRIM16   | 0.231403 | 1.09E-07 | 3.71E-07 |
| TRIM17   | -0.20651 | 2.29E-06 | 6.63E-06 |
| TRIM21   | -0.00264 | 9.52E-01 | 9.62E-01 |
| TRIM22   | -0.30379 | 1.86E-12 | 1.07E-11 |
| TRIM23   | -0.20076 | 4.39E-06 | 1.24E-05 |
| TRIM24   | -0.04788 | 2.78E-01 | 3.40E-01 |
| TRIM25   | 0.146464 | 8.57E-04 | 1.74E-03 |
| TRIM26   | -0.09794 | 2.63E-02 | 4.10E-02 |
| TRIM27   | -0.07732 | 7.96E-02 | 1.12E-01 |
| TRIM28   | 0.321068 | 8.20E-14 | 5.36E-13 |
| TRIM29   | -0.01196 | 7.87E-01 | 8.23E-01 |

|              |          |          |          |
|--------------|----------|----------|----------|
| TRIM2        | -0.21749 | 6.25E-07 | 1.95E-06 |
| TRIM31       | 0.105347 | 1.68E-02 | 2.73E-02 |
| TRIM32       | -0.06197 | 1.60E-01 | 2.10E-01 |
| TRIM33       | 0.02061  | 6.41E-01 | 6.95E-01 |
| TRIM34       | -0.11918 | 6.77E-03 | 1.19E-02 |
| TRIM35       | -0.27485 | 2.23E-10 | 1.03E-09 |
| TRIM36       | 0.013984 | 7.52E-01 | 7.93E-01 |
| TRIM37       | 0.191485 | 1.21E-05 | 3.21E-05 |
| TRIM38       | -0.20468 | 2.82E-06 | 8.10E-06 |
| TRIM39       | -0.31851 | 1.32E-13 | 8.43E-13 |
| TRIM3        | -0.34792 | 4.23E-16 | 3.44E-15 |
| TRIM40       | 0.165964 | 1.55E-04 | 3.50E-04 |
| TRIM41       | -0.31991 | 1.02E-13 | 6.57E-13 |
| TRIM42       | 0.076265 | 8.38E-02 | 1.18E-01 |
| TRIM43       | 0.098774 | 2.50E-02 | 3.92E-02 |
| TRIM44       | 0.035741 | 4.18E-01 | 4.85E-01 |
| TRIM45       | -0.04684 | 2.89E-01 | 3.51E-01 |
| TRIM46       | -0.00354 | 9.36E-01 | 9.50E-01 |
| TRIM47       | 0.06048  | 1.71E-01 | 2.22E-01 |
| TRIM48       | -0.07371 | 9.47E-02 | 1.31E-01 |
| TRIM49L      | 0.048763 | 2.69E-01 | 3.31E-01 |
| TRIM49       | -0.11584 | 8.51E-03 | 1.46E-02 |
| TRIM4        | -0.24685 | 1.38E-08 | 5.15E-08 |
| TRIM50       | -0.32437 | 4.41E-14 | 2.95E-13 |
| TRIM52       | -0.33177 | 1.07E-14 | 7.56E-14 |
| TRIM53       | -0.12496 | 4.51E-03 | 8.16E-03 |
| TRIM54       | -0.08563 | 5.21E-02 | 7.66E-02 |
| TRIM55       | -0.02996 | 4.98E-01 | 5.62E-01 |
| TRIM56       | -0.04716 | 2.85E-01 | 3.48E-01 |
| TRIM58       | -0.0114  | 7.96E-01 | 8.32E-01 |
| TRIM59       | 0.55118  | 2.92E-42 | 1.51E-40 |
| TRIM5        | -0.26635 | 8.20E-10 | 3.54E-09 |
| TRIM6-TRIM34 | 0.000482 | 9.91E-01 | 9.93E-01 |
| TRIM60       | 0.023686 | 5.92E-01 | 6.50E-01 |
| TRIM61       | -0.14659 | 8.48E-04 | 1.72E-03 |
| TRIM62       | -0.17417 | 7.09E-05 | 1.69E-04 |
| TRIM63       | -0.3046  | 1.62E-12 | 9.30E-12 |
| TRIM64       | 0.073329 | 9.65E-02 | 1.33E-01 |
| TRIM65       | -0.02534 | 5.66E-01 | 6.26E-01 |
| TRIM66       | -0.3856  | 1.06E-19 | 1.20E-18 |
| TRIM67       | -0.01284 | 7.71E-01 | 8.10E-01 |
| TRIM68       | -0.29521 | 8.14E-12 | 4.33E-11 |
| TRIM69       | 0.21499  | 8.45E-07 | 2.58E-06 |
| TRIM6        | 0.133287 | 2.44E-03 | 4.60E-03 |

|          |          |           |           |
|----------|----------|-----------|-----------|
| TRIM71   | -0.33461 | 6.14E-15  | 4.45E-14  |
| TRIM72   | 0.104628 | 1.75E-02  | 2.84E-02  |
| TRIM74   | -0.17005 | 1.05E-04  | 2.45E-04  |
| TRIM77   | 0.086913 | 4.87E-02  | 7.20E-02  |
| TRIM78P  | -0.20954 | 1.61E-06  | 4.76E-06  |
| TRIM7    | 0.099251 | 2.43E-02  | 3.82E-02  |
| TRIM8    | -0.37606 | 9.57E-19  | 9.93E-18  |
| TRIM9    | 0.245807 | 1.59E-08  | 5.91E-08  |
| TRIML1   | 0.047782 | 2.79E-01  | 3.41E-01  |
| TRIML2   | 0.152541 | 5.13E-04  | 1.08E-03  |
| TRIOBP   | -0.26245 | 1.47E-09  | 6.16E-09  |
| TRIO     | 0.146117 | 8.82E-04  | 1.79E-03  |
| TRIP10   | 0.05707  | 1.96E-01  | 2.50E-01  |
| TRIP11   | -0.01021 | 8.17E-01  | 8.49E-01  |
| TRIP12   | 0.277401 | 1.49E-10  | 6.99E-10  |
| TRIP13   | 0.767164 | 5.45E-101 | 8.85E-99  |
| TRIP4    | 0.113481 | 9.96E-03  | 1.69E-02  |
| TRIP6    | -0.2011  | 4.23E-06  | 1.19E-05  |
| TRIT1    | 0.183621 | 2.76E-05  | 6.95E-05  |
| TRMT112  | 0.171011 | 9.61E-05  | 2.25E-04  |
| TRMT11   | 0.140256 | 1.42E-03  | 2.78E-03  |
| TRMT12   | 0.122154 | 5.51E-03  | 9.82E-03  |
| TRMT1    | 0.029612 | 5.03E-01  | 5.67E-01  |
| TRMT2A   | 0.080829 | 6.68E-02  | 9.61E-02  |
| TRMT2B   | -0.04338 | 3.26E-01  | 3.91E-01  |
| TRMT5    | 0.104024 | 1.82E-02  | 2.94E-02  |
| TRMT61A  | 0.02717  | 5.38E-01  | 6.01E-01  |
| TRMT61B  | 0.357208 | 6.05E-17  | 5.38E-16  |
| TRMT6    | 0.360624 | 2.91E-17  | 2.67E-16  |
| TRMU     | 0.043107 | 3.29E-01  | 3.94E-01  |
| TRNAU1AP | -0.13727 | 1.79E-03  | 3.46E-03  |
| TRNP1    | 0.050457 | 2.53E-01  | 3.14E-01  |
| TRNT1    | 0.093112 | 3.46E-02  | 5.28E-02  |
| TROAP    | 0.804205 | 5.31E-118 | 1.18E-115 |
| TROVE2   | -0.0248  | 5.74E-01  | 6.34E-01  |
| TRO      | 0.075051 | 8.89E-02  | 1.24E-01  |
| TRPA1    | 0.397834 | 5.61E-21  | 7.14E-20  |
| TRPC1    | 0.150896 | 5.91E-04  | 1.23E-03  |
| TRPC2    | -0.26478 | 1.04E-09  | 4.43E-09  |
| TRPC3    | -0.0811  | 6.59E-02  | 9.49E-02  |
| TRPC4AP  | 0.056    | 2.05E-01  | 2.60E-01  |
| TRPC4    | 0.066903 | 1.29E-01  | 1.74E-01  |
| TRPC5    | -0.02502 | 5.71E-01  | 6.31E-01  |
| TRPC6    | -0.32675 | 2.81E-14  | 1.92E-13  |



|          |          |          |          |
|----------|----------|----------|----------|
| TRPC7    | 0.044988 | 3.08E-01 | 3.72E-01 |
| TRPM1    | -0.13931 | 1.53E-03 | 2.98E-03 |
| TRPM2    | 0.239824 | 3.59E-08 | 1.28E-07 |
| TRPM3    | -0.09894 | 2.47E-02 | 3.89E-02 |
| TRPM4    | -0.29442 | 9.30E-12 | 4.92E-11 |
| TRPM5    | -0.1079  | 1.43E-02 | 2.36E-02 |
| TRPM6    | -0.05095 | 2.48E-01 | 3.09E-01 |
| TRPM7    | -0.10768 | 1.45E-02 | 2.39E-02 |
| TRPM8    | 0.129642 | 3.21E-03 | 5.94E-03 |
| TRPS1    | 0.111319 | 1.15E-02 | 1.93E-02 |
| TRPT1    | 0.102989 | 1.94E-02 | 3.12E-02 |
| TRPV1    | -0.27525 | 2.09E-10 | 9.68E-10 |
| TRPV2    | -0.05435 | 2.18E-01 | 2.75E-01 |
| TRPV3    | 0.241126 | 3.01E-08 | 1.09E-07 |
| TRPV4    | -0.08888 | 4.38E-02 | 6.54E-02 |
| TRPV5    | 0.013613 | 7.58E-01 | 7.99E-01 |
| TRPV6    | -0.29002 | 1.94E-11 | 9.93E-11 |
| TRRAP    | 0.142978 | 1.14E-03 | 2.27E-03 |
| TRUB1    | 0.249595 | 9.38E-09 | 3.59E-08 |
| TRUB2    | 0.106347 | 1.58E-02 | 2.58E-02 |
| TRY6     | 0.077117 | 8.04E-02 | 1.13E-01 |
| TSC1     | -0.26549 | 9.33E-10 | 4.00E-09 |
| TSC22D1  | -0.28868 | 2.42E-11 | 1.23E-10 |
| TSC22D2  | 0.358609 | 4.49E-17 | 4.05E-16 |
| TSC22D3  | -0.41996 | 2.02E-23 | 3.14E-22 |
| TSC22D4  | -0.07393 | 9.37E-02 | 1.30E-01 |
| TSC2     | -0.37819 | 5.89E-19 | 6.22E-18 |
| TSEN15   | 0.18503  | 2.39E-05 | 6.07E-05 |
| TSEN2    | 0.03095  | 4.83E-01 | 5.49E-01 |
| TSEN34   | 0.031503 | 4.76E-01 | 5.41E-01 |
| TSEN54   | 0.153723 | 4.64E-04 | 9.78E-04 |
| TSFM     | 0.257167 | 3.19E-09 | 1.28E-08 |
| TSG101   | 0.016124 | 7.15E-01 | 7.62E-01 |
| TSG1     | 0.08736  | 4.75E-02 | 7.04E-02 |
| TSGA10IP | -0.12652 | 4.03E-03 | 7.35E-03 |
| TSGA10   | -0.17979 | 4.07E-05 | 1.00E-04 |
| TSGA13   | 0.10262  | 1.98E-02 | 3.18E-02 |
| TSGA14   | 0.238931 | 4.05E-08 | 1.44E-07 |
| TSHB     | -0.15744 | 3.35E-04 | 7.23E-04 |
| TSHR     | -0.04793 | 2.78E-01 | 3.40E-01 |
| TSHZ1    | -0.14168 | 1.27E-03 | 2.50E-03 |
| TSHZ2    | 0.033278 | 4.51E-01 | 5.17E-01 |
| TSHZ3    | 0.002932 | 9.47E-01 | 9.58E-01 |
| TSIX     | -0.06831 | 1.22E-01 | 1.64E-01 |

|             |          |          |          |
|-------------|----------|----------|----------|
| TSKS        | -0.0154  | 7.27E-01 | 7.73E-01 |
| TSKU        | 0.31173  | 4.55E-13 | 2.77E-12 |
| TSLP        | -0.34189 | 1.44E-15 | 1.11E-14 |
| TSNARE1     | -0.32168 | 7.31E-14 | 4.80E-13 |
| TSNAX-DISC1 | 0.193732 | 9.52E-06 | 2.56E-05 |
| TSNAXIP1    | -0.2341  | 7.68E-08 | 2.65E-07 |
| TSNAX       | -0.00543 | 9.02E-01 | 9.21E-01 |
| TSN         | 0.428671 | 1.96E-24 | 3.32E-23 |
| TSPAN10     | 0.0159   | 7.19E-01 | 7.65E-01 |
| TSPAN11     | -0.31326 | 3.45E-13 | 2.12E-12 |
| TSPAN12     | -0.18086 | 3.65E-05 | 9.04E-05 |
| TSPAN13     | -0.0682  | 1.22E-01 | 1.65E-01 |
| TSPAN14     | -0.05797 | 1.89E-01 | 2.43E-01 |
| TSPAN15     | -0.02532 | 5.66E-01 | 6.26E-01 |
| TSPAN16     | -0.03758 | 3.95E-01 | 4.62E-01 |
| TSPAN17     | 0.029792 | 5.00E-01 | 5.64E-01 |
| TSPAN18     | -0.15496 | 4.16E-04 | 8.85E-04 |
| TSPAN19     | -0.19615 | 7.32E-06 | 1.99E-05 |
| TSPAN1      | -0.18515 | 2.36E-05 | 6.00E-05 |
| TSPAN2      | -0.03288 | 4.57E-01 | 5.23E-01 |
| TSPAN31     | -0.15455 | 4.32E-04 | 9.15E-04 |
| TSPAN32     | -0.27114 | 3.96E-10 | 1.78E-09 |
| TSPAN33     | 0.218764 | 5.35E-07 | 1.68E-06 |
| TSPAN3      | -0.34159 | 1.53E-15 | 1.17E-14 |
| TSPAN4      | -0.436   | 2.61E-25 | 4.74E-24 |
| TSPAN5      | 0.18977  | 1.45E-05 | 3.80E-05 |
| TSPAN6      | 0.042797 | 3.32E-01 | 3.98E-01 |
| TSPAN7      | -0.33553 | 5.12E-15 | 3.75E-14 |
| TSPAN8      | -0.17618 | 5.82E-05 | 1.40E-04 |
| TSPAN9      | -0.24695 | 1.36E-08 | 5.09E-08 |
| TSPO2       | 0.016295 | 7.12E-01 | 7.59E-01 |
| TSPO        | -0.13651 | 1.90E-03 | 3.66E-03 |
| TSPY1       | 0.085832 | 5.16E-02 | 7.58E-02 |
| TSPY2       | 0.103289 | 1.90E-02 | 3.06E-02 |
| TSPY3       | 0.093893 | 3.31E-02 | 5.08E-02 |
| TSPY4       | 0.064593 | 1.43E-01 | 1.90E-01 |
| TSPYL1      | -0.29426 | 9.56E-12 | 5.05E-11 |
| TSPYL2      | -0.38121 | 2.94E-19 | 3.20E-18 |
| TSPYL3      | -0.05135 | 2.45E-01 | 3.05E-01 |
| TSPYL4      | -0.06433 | 1.45E-01 | 1.92E-01 |
| TSPYL5      | 0.015338 | 7.28E-01 | 7.74E-01 |
| TSPYL6      | -0.01667 | 7.06E-01 | 7.54E-01 |
| TSR1        | 0.354823 | 1.00E-16 | 8.68E-16 |
| TSR2        | 0.030687 | 4.87E-01 | 5.52E-01 |

|        |          |          |          |
|--------|----------|----------|----------|
| TSSC1  | 0.47143  | 7.44E-30 | 1.89E-28 |
| TSSC4  | -0.04237 | 3.37E-01 | 4.03E-01 |
| TSSK1B | -0.0633  | 1.51E-01 | 1.99E-01 |
| TSSK3  | -0.37153 | 2.66E-18 | 2.67E-17 |
| TSSK4  | -0.23294 | 8.93E-08 | 3.06E-07 |
| TSSK6  | -0.09571 | 2.99E-02 | 4.61E-02 |
| TSTA3  | -0.13618 | 1.95E-03 | 3.75E-03 |
| TSTD1  | -0.34384 | 9.73E-16 | 7.62E-15 |
| TSTD2  | -0.11145 | 1.14E-02 | 1.91E-02 |
| TST    | -0.30204 | 2.52E-12 | 1.43E-11 |
| TTBK1  | 0.037841 | 3.91E-01 | 4.58E-01 |
| TTBK2  | -0.15071 | 6.00E-04 | 1.25E-03 |
| TTC12  | -0.34644 | 5.74E-16 | 4.61E-15 |
| TTC13  | -0.09454 | 3.20E-02 | 4.90E-02 |
| TTC14  | -0.19004 | 1.41E-05 | 3.70E-05 |
| TTC15  | -0.16244 | 2.14E-04 | 4.76E-04 |
| TTC16  | -0.37186 | 2.47E-18 | 2.48E-17 |
| TTC17  | -0.16431 | 1.80E-04 | 4.05E-04 |
| TTC18  | -0.29142 | 1.54E-11 | 7.94E-11 |
| TTC19  | -0.36106 | 2.65E-17 | 2.44E-16 |
| TTC1   | -0.03174 | 4.72E-01 | 5.38E-01 |
| TTC21A | -0.3779  | 6.30E-19 | 6.63E-18 |
| TTC21B | -0.08031 | 6.86E-02 | 9.85E-02 |
| TTC22  | -0.11975 | 6.51E-03 | 1.14E-02 |
| TTC23L | -0.30122 | 2.91E-12 | 1.63E-11 |
| TTC23  | -0.17741 | 5.15E-05 | 1.25E-04 |
| TTC24  | 0.077742 | 7.80E-02 | 1.10E-01 |
| TTC25  | -0.27506 | 2.15E-10 | 9.95E-10 |
| TTC26  | 0.175003 | 6.53E-05 | 1.56E-04 |
| TTC27  | 0.365505 | 1.01E-17 | 9.60E-17 |
| TTC28  | -0.32278 | 5.95E-14 | 3.94E-13 |
| TTC29  | -0.24709 | 1.33E-08 | 4.99E-08 |
| TTC30A | -0.03071 | 4.87E-01 | 5.52E-01 |
| TTC30B | -0.0631  | 1.53E-01 | 2.01E-01 |
| TTC31  | -0.12331 | 5.08E-03 | 9.11E-03 |
| TTC32  | 0.178695 | 4.54E-05 | 1.11E-04 |
| TTC33  | 0.003327 | 9.40E-01 | 9.53E-01 |
| TTC35  | -0.00067 | 9.88E-01 | 9.91E-01 |
| TTC36  | -0.11951 | 6.62E-03 | 1.16E-02 |
| TTC37  | -0.09567 | 2.99E-02 | 4.62E-02 |
| TTC38  | -0.28115 | 8.23E-11 | 3.94E-10 |
| TTC39A | -0.08043 | 6.82E-02 | 9.79E-02 |
| TTC39B | 0.047186 | 2.85E-01 | 3.47E-01 |
| TTC39C | 0.058222 | 1.87E-01 | 2.41E-01 |

|        |          |           |           |
|--------|----------|-----------|-----------|
| TTC3   | -0.29787 | 5.18E-12  | 2.82E-11  |
| TTC4   | 0.269254 | 5.28E-10  | 2.33E-09  |
| TTC5   | 0.198287 | 5.79E-06  | 1.60E-05  |
| TTC7A  | -0.02611 | 5.54E-01  | 6.16E-01  |
| TTC7B  | 0.141608 | 1.27E-03  | 2.52E-03  |
| TTC8   | 0.121597 | 5.73E-03  | 1.02E-02  |
| TTC9B  | 0.182242 | 3.17E-05  | 7.92E-05  |
| TTC9C  | 0.299476 | 3.93E-12  | 2.17E-11  |
| TTC9   | 0.073986 | 9.35E-02  | 1.30E-01  |
| TTF1   | 0.056393 | 2.01E-01  | 2.57E-01  |
| TTF2   | 0.566413 | 4.96E-45  | 2.90E-43  |
| TTK    | 0.865476 | 4.02E-156 | 2.98E-153 |
| TTLL10 | -0.30708 | 1.04E-12  | 6.11E-12  |
| TTLL11 | -0.30379 | 1.86E-12  | 1.07E-11  |
| TTLL12 | 0.16867  | 1.20E-04  | 2.77E-04  |
| TTLL13 | 0.012845 | 7.71E-01  | 8.10E-01  |
| TTLL1  | -0.29443 | 9.29E-12  | 4.92E-11  |
| TTLL2  | -0.18072 | 3.70E-05  | 9.17E-05  |
| TTLL3  | -0.30682 | 1.09E-12  | 6.38E-12  |
| TTLL4  | 0.330586 | 1.34E-14  | 9.43E-14  |
| TTLL5  | 0.093519 | 3.39E-02  | 5.17E-02  |
| TTLL6  | -0.30795 | 8.95E-13  | 5.28E-12  |
| TTLL7  | 0.206846 | 2.20E-06  | 6.40E-06  |
| TTLL8  | 0.145878 | 8.99E-04  | 1.82E-03  |
| TTLL9  | -0.33197 | 1.03E-14  | 7.30E-14  |
| TTL    | 0.495274 | 3.15E-33  | 9.82E-32  |
| TTN    | -0.15194 | 5.40E-04  | 1.13E-03  |
| TTPAL  | 0.314604 | 2.70E-13  | 1.68E-12  |
| TTPA   | 0.108909 | 1.34E-02  | 2.23E-02  |
| TTR    | -0.1137  | 9.81E-03  | 1.67E-02  |
| TTY10  | -0.07682 | 8.16E-02  | 1.15E-01  |
| TTY14  | -0.11259 | 1.06E-02  | 1.78E-02  |
| TTY15  | 0.033712 | 4.45E-01  | 5.12E-01  |
| TTY16  | -0.02221 | 6.15E-01  | 6.72E-01  |
| TTY1B  | 0.017682 | 6.89E-01  | 7.38E-01  |
| TTY2   | -0.08624 | 5.05E-02  | 7.43E-02  |
| TTY4C  | -0.03706 | 4.01E-01  | 4.68E-01  |
| TTY5   | -0.06533 | 1.39E-01  | 1.84E-01  |
| TTY6B  | 0.09146  | 3.80E-02  | 5.74E-02  |
| TTY6   | 0.050183 | 2.56E-01  | 3.16E-01  |
| TTY7   | -0.00275 | 9.50E-01  | 9.61E-01  |
| TTY8   | -0.1286  | 3.46E-03  | 6.38E-03  |
| TTY9B  | -0.09725 | 2.73E-02  | 4.25E-02  |
| TYH1   | 0.22758  | 1.78E-07  | 5.92E-07  |

|         |          |          |          |
|---------|----------|----------|----------|
| TTYH2   | -0.27207 | 3.43E-10 | 1.55E-09 |
| TTYH3   | 0.291635 | 1.48E-11 | 7.68E-11 |
| TUBA1A  | 0.069702 | 1.14E-01 | 1.55E-01 |
| TUBA1B  | 0.735879 | 6.43E-89 | 8.86E-87 |
| TUBA1C  | 0.674831 | 1.05E-69 | 1.10E-67 |
| TUBA3C  | 0.12988  | 3.15E-03 | 5.85E-03 |
| TUBA3D  | -0.05544 | 2.09E-01 | 2.65E-01 |
| TUBA3E  | 0.073138 | 9.73E-02 | 1.34E-01 |
| TUBA4A  | 0.238733 | 4.16E-08 | 1.48E-07 |
| TUBA4B  | -0.28203 | 7.15E-11 | 3.45E-10 |
| TUBA8   | 0.001714 | 9.69E-01 | 9.76E-01 |
| TUBAL3  | 0.146908 | 8.26E-04 | 1.68E-03 |
| TUBB1   | -0.27763 | 1.44E-10 | 6.75E-10 |
| TUBB2A  | 0.205727 | 2.50E-06 | 7.22E-06 |
| TUBB2B  | 0.214841 | 8.60E-07 | 2.63E-06 |
| TUBB2C  | 0.207    | 2.16E-06 | 6.29E-06 |
| TUBB3   | 0.430982 | 1.04E-24 | 1.80E-23 |
| TUBB4Q  | -0.09802 | 2.61E-02 | 4.08E-02 |
| TUBB4   | 0.293    | 1.18E-11 | 6.17E-11 |
| TUBB6   | 0.27864  | 1.23E-10 | 5.79E-10 |
| TUBB8   | -0.01349 | 7.60E-01 | 8.00E-01 |
| TUBBP5  | -0.15165 | 5.54E-04 | 1.16E-03 |
| TUBB    | 0.617863 | 1.54E-55 | 1.18E-53 |
| TUBD1   | 0.26642  | 8.11E-10 | 3.51E-09 |
| TUBE1   | 0.021218 | 6.31E-01 | 6.86E-01 |
| TUBG1   | 0.613861 | 1.19E-54 | 8.95E-53 |
| TUBG2   | -0.10255 | 1.99E-02 | 3.19E-02 |
| TUBGCP2 | -0.14461 | 9.98E-04 | 2.01E-03 |
| TUBGCP3 | 0.0904   | 4.03E-02 | 6.06E-02 |
| TUBGCP4 | 0.181056 | 3.58E-05 | 8.88E-05 |
| TUBGCP5 | -0.02959 | 5.03E-01 | 5.67E-01 |
| TUBGCP6 | -0.37996 | 3.92E-19 | 4.21E-18 |
| TUB     | -0.33482 | 5.89E-15 | 4.28E-14 |
| TUFM    | -0.04867 | 2.70E-01 | 3.32E-01 |
| TUFT1   | 0.202799 | 3.49E-06 | 9.93E-06 |
| TUG1    | -0.0215  | 6.26E-01 | 6.82E-01 |
| TULP1   | 0.15455  | 4.32E-04 | 9.15E-04 |
| TULP2   | 0.048222 | 2.75E-01 | 3.37E-01 |
| TULP3   | 0.197925 | 6.02E-06 | 1.66E-05 |
| TULP4   | -0.09841 | 2.55E-02 | 4.00E-02 |
| TUSC1   | -0.0901  | 4.10E-02 | 6.15E-02 |
| TUSC2   | -0.11972 | 6.53E-03 | 1.15E-02 |
| TUSC3   | 0.191227 | 1.25E-05 | 3.29E-05 |
| TUSC5   | -0.06954 | 1.15E-01 | 1.56E-01 |

|           |          |           |           |
|-----------|----------|-----------|-----------|
| TUT1      | -0.11905 | 6.84E-03  | 1.20E-02  |
| TWF1      | 0.49835  | 1.11E-33  | 3.52E-32  |
| TWF2      | 0.049696 | 2.60E-01  | 3.21E-01  |
| TWIST1    | 0.335816 | 4.84E-15  | 3.55E-14  |
| TWIST2    | 0.017865 | 6.86E-01  | 7.35E-01  |
| TWISTNB   | 0.350926 | 2.27E-16  | 1.90E-15  |
| TWSG1     | 0.204056 | 3.03E-06  | 8.67E-06  |
| TXK       | -0.05507 | 2.12E-01  | 2.68E-01  |
| TXLNA     | -0.09015 | 4.09E-02  | 6.14E-02  |
| TXLNB     | -0.05704 | 1.96E-01  | 2.51E-01  |
| TXLNG     | 0.052759 | 2.32E-01  | 2.90E-01  |
| TXN2      | -0.05155 | 2.43E-01  | 3.03E-01  |
| TXNDC11   | -0.48471 | 1.06E-31  | 3.04E-30  |
| TXNDC12   | 0.156423 | 3.66E-04  | 7.86E-04  |
| TXNDC15   | -0.29589 | 7.26E-12  | 3.88E-11  |
| TXNDC16   | 0.011905 | 7.88E-01  | 8.24E-01  |
| TXNDC17   | 0.014224 | 7.47E-01  | 7.90E-01  |
| TXNDC2    | 0.049668 | 2.61E-01  | 3.22E-01  |
| TXNDC3    | -0.06074 | 1.69E-01  | 2.19E-01  |
| TXNDC5    | 0.001043 | 9.81E-01  | 9.86E-01  |
| TXNDC6    | -0.29687 | 6.14E-12  | 3.32E-11  |
| TXNDC9    | 0.351167 | 2.16E-16  | 1.81E-15  |
| TXNIP     | -0.40619 | 7.04E-22  | 9.59E-21  |
| TXNL1     | 0.181996 | 3.25E-05  | 8.11E-05  |
| TXNL4A    | 0.180707 | 3.71E-05  | 9.18E-05  |
| TXNL4B    | 0.11734  | 7.68E-03  | 1.33E-02  |
| TXNRD1    | 0.388226 | 5.68E-20  | 6.62E-19  |
| TXNRD2    | -0.31111 | 5.08E-13  | 3.08E-12  |
| TXNRD3IT1 | -0.03671 | 4.06E-01  | 4.72E-01  |
| TXN       | 0.190198 | 1.39E-05  | 3.64E-05  |
| TYK2      | -0.17341 | 7.63E-05  | 1.81E-04  |
| TYMP      | 0.119063 | 6.83E-03  | 1.19E-02  |
| TYMS      | 0.792211 | 4.09E-112 | 8.17E-110 |
| TYRO3     | 0.159644 | 2.75E-04  | 6.02E-04  |
| TYROBP    | -0.04889 | 2.68E-01  | 3.30E-01  |
| TYRP1     | -0.37361 | 1.67E-18  | 1.70E-17  |
| TYR       | -0.02766 | 5.31E-01  | 5.94E-01  |
| TYSND1    | -0.10394 | 1.83E-02  | 2.95E-02  |
| TYW1B     | -0.13483 | 2.17E-03  | 4.12E-03  |
| TYW1      | 0.031322 | 4.78E-01  | 5.43E-01  |
| TYW3      | -0.04882 | 2.69E-01  | 3.31E-01  |
| T         | -0.08273 | 6.06E-02  | 8.80E-02  |
| U2AF1L4   | 0.018656 | 6.73E-01  | 7.24E-01  |
| U2AF1     | 0.190858 | 1.30E-05  | 3.41E-05  |

|         |          |           |           |
|---------|----------|-----------|-----------|
| U2AF2   | 0.329642 | 1.61E-14  | 1.12E-13  |
| UACA    | 0.066605 | 1.31E-01  | 1.76E-01  |
| UAP1L1  | 0.032752 | 4.58E-01  | 5.25E-01  |
| UAP1    | 0.160587 | 2.53E-04  | 5.56E-04  |
| UBA1    | 0.110872 | 1.18E-02  | 1.98E-02  |
| UBA2    | 0.514405 | 3.93E-36  | 1.45E-34  |
| UBA3    | 0.149118 | 6.87E-04  | 1.42E-03  |
| UBA52   | -0.00404 | 9.27E-01  | 9.42E-01  |
| UBA5    | 0.153276 | 4.82E-04  | 1.01E-03  |
| UBA6    | 0.53601  | 1.22E-39  | 5.52E-38  |
| UBA7    | -0.32444 | 4.35E-14  | 2.92E-13  |
| UBAC1   | 0.249495 | 9.51E-09  | 3.64E-08  |
| UBAC2   | 0.113554 | 9.91E-03  | 1.68E-02  |
| UBAP1   | -0.05822 | 1.87E-01  | 2.41E-01  |
| UBAP2L  | 0.036819 | 4.04E-01  | 4.71E-01  |
| UBAP2   | 0.192741 | 1.06E-05  | 2.82E-05  |
| UBASH3A | -0.07748 | 7.90E-02  | 1.12E-01  |
| UBASH3B | 0.072393 | 1.01E-01  | 1.39E-01  |
| UBB     | -0.09587 | 2.96E-02  | 4.57E-02  |
| UBC     | 0.155433 | 4.00E-04  | 8.52E-04  |
| UBD     | 0.200341 | 4.61E-06  | 1.29E-05  |
| UBE2A   | 0.172061 | 8.69E-05  | 2.04E-04  |
| UBE2B   | -0.0567  | 1.99E-01  | 2.54E-01  |
| UBE2CBP | 0.143037 | 1.13E-03  | 2.26E-03  |
| UBE2C   | 0.785091 | 8.42E-109 | 1.57E-106 |
| UBE2D1  | 0.349043 | 3.35E-16  | 2.75E-15  |
| UBE2D2  | 0.139677 | 1.48E-03  | 2.90E-03  |
| UBE2D3  | 0.100501 | 2.26E-02  | 3.57E-02  |
| UBE2D4  | -0.05285 | 2.31E-01  | 2.90E-01  |
| UBE2DNL | 0.00179  | 9.68E-01  | 9.75E-01  |
| UBE2E1  | 0.208972 | 1.72E-06  | 5.07E-06  |
| UBE2E2  | 0.13989  | 1.46E-03  | 2.86E-03  |
| UBE2E3  | 0.362673 | 1.87E-17  | 1.74E-16  |
| UBE2F   | 0.430853 | 1.08E-24  | 1.86E-23  |
| UBE2G1  | 0.186893 | 1.97E-05  | 5.06E-05  |
| UBE2G2  | -0.30574 | 1.32E-12  | 7.67E-12  |
| UBE2H   | 0.184915 | 2.41E-05  | 6.14E-05  |
| UBE2I   | 0.140025 | 1.44E-03  | 2.83E-03  |
| UBE2J1  | 0.072294 | 1.01E-01  | 1.39E-01  |
| UBE2J2  | 0.081511 | 6.46E-02  | 9.32E-02  |
| UBE2K   | 0.374135 | 1.48E-18  | 1.52E-17  |
| UBE2L3  | 0.199356 | 5.14E-06  | 1.43E-05  |
| UBE2L6  | 0.242172 | 2.61E-08  | 9.50E-08  |
| UBE2MP1 | 0.385605 | 1.05E-19  | 1.20E-18  |

|          |          |           |           |
|----------|----------|-----------|-----------|
| UBE2M    | 0.358068 | 5.04E-17  | 4.51E-16  |
| UBE2NL   | 0.193446 | 9.82E-06  | 2.63E-05  |
| UBE2N    | 0.429133 | 1.73E-24  | 2.93E-23  |
| UBE2O    | 0.223331 | 3.04E-07  | 9.85E-07  |
| UBE2Q1   | 0.011501 | 7.95E-01  | 8.30E-01  |
| UBE2Q2P1 | -0.26686 | 7.59E-10  | 3.29E-09  |
| UBE2Q2   | 0.172245 | 8.54E-05  | 2.01E-04  |
| UBE2QL1  | 0.024458 | 5.80E-01  | 6.39E-01  |
| UBE2R2   | 0.322248 | 6.57E-14  | 4.34E-13  |
| UBE2S    | 0.690272 | 4.11E-74  | 4.59E-72  |
| UBE2T    | 0.785105 | 8.30E-109 | 1.56E-106 |
| UBE2U    | -0.11492 | 9.04E-03  | 1.55E-02  |
| UBE2V1   | 0.249127 | 1.00E-08  | 3.82E-08  |
| UBE2V2   | 0.456499 | 7.11E-28  | 1.57E-26  |
| UBE2W    | 0.095806 | 2.97E-02  | 4.59E-02  |
| UBE2Z    | 0.349903 | 2.81E-16  | 2.32E-15  |
| UBE3A    | 0.043471 | 3.25E-01  | 3.90E-01  |
| UBE3B    | -0.04587 | 2.99E-01  | 3.62E-01  |
| UBE3C    | 0.344114 | 9.21E-16  | 7.24E-15  |
| UBE4A    | 0.059983 | 1.74E-01  | 2.26E-01  |
| UBE4B    | -0.09394 | 3.31E-02  | 5.06E-02  |
| UBFD1    | 0.080032 | 6.96E-02  | 9.97E-02  |
| UBIAD1   | -0.1398  | 1.47E-03  | 2.88E-03  |
| UBL3     | -0.47604 | 1.74E-30  | 4.62E-29  |
| UBL4A    | 0.319732 | 1.05E-13  | 6.79E-13  |
| UBL4B    | 0.034467 | 4.35E-01  | 5.02E-01  |
| UBL5     | 0.112618 | 1.05E-02  | 1.78E-02  |
| UBL7     | -0.07051 | 1.10E-01  | 1.50E-01  |
| UBLCP1   | -0.13192 | 2.70E-03  | 5.07E-03  |
| UBN1     | -0.09583 | 2.97E-02  | 4.58E-02  |
| UBN2     | -0.19866 | 5.56E-06  | 1.54E-05  |
| UBOX5    | -0.13112 | 2.87E-03  | 5.36E-03  |
| UBP1     | -0.13613 | 1.96E-03  | 3.76E-03  |
| UBQLN1   | 0.220141 | 4.52E-07  | 1.43E-06  |
| UBQLN2   | 0.029673 | 5.02E-01  | 5.66E-01  |
| UBQLN3   | -0.07289 | 9.85E-02  | 1.36E-01  |
| UBQLN4   | 0.044344 | 3.15E-01  | 3.80E-01  |
| UBQLNL   | -0.33553 | 5.12E-15  | 3.75E-14  |
| UBR1     | -0.16788 | 1.29E-04  | 2.97E-04  |
| UBR2     | -0.02557 | 5.63E-01  | 6.23E-01  |
| UBR3     | -0.17394 | 7.24E-05  | 1.72E-04  |
| UBR4     | -0.0034  | 9.39E-01  | 9.52E-01  |
| UBR5     | 0.141478 | 1.29E-03  | 2.54E-03  |
| UBR7     | 0.253949 | 5.06E-09  | 2.00E-08  |



|         |          |          |          |
|---------|----------|----------|----------|
| UBTD1   | -0.52406 | 1.14E-37 | 4.56E-36 |
| UBTD2   | 0.062592 | 1.56E-01 | 2.05E-01 |
| UBTFL1  | 0.012669 | 7.74E-01 | 8.12E-01 |
| UBTF    | 0.065086 | 1.40E-01 | 1.86E-01 |
| UBXN10  | -0.37267 | 2.06E-18 | 2.08E-17 |
| UBXN11  | -0.21717 | 6.50E-07 | 2.02E-06 |
| UBXN1   | -0.04175 | 3.44E-01 | 4.10E-01 |
| UBXN2A  | 0.476885 | 1.33E-30 | 3.55E-29 |
| UBXN2B  | -0.04992 | 2.58E-01 | 3.19E-01 |
| UBXN4   | 0.214639 | 8.81E-07 | 2.69E-06 |
| UBXN6   | -0.22008 | 4.55E-07 | 1.44E-06 |
| UBXN7   | 0.250672 | 8.06E-09 | 3.11E-08 |
| UBXN8   | -0.11132 | 1.15E-02 | 1.93E-02 |
| UCA1    | 0.148863 | 7.02E-04 | 1.44E-03 |
| UCHL1   | 0.27418  | 2.47E-10 | 1.13E-09 |
| UCHL3   | 0.441106 | 6.23E-26 | 1.19E-24 |
| UCHL5   | 0.353644 | 1.29E-16 | 1.10E-15 |
| UCK1    | -0.0415  | 3.47E-01 | 4.13E-01 |
| UCK2    | 0.5565   | 3.26E-43 | 1.75E-41 |
| UCKL1AS | -0.19901 | 5.34E-06 | 1.48E-05 |
| UCKL1   | -0.0228  | 6.06E-01 | 6.63E-01 |
| UCMA    | 0.110151 | 1.24E-02 | 2.07E-02 |
| UCN2    | 0.328491 | 2.01E-14 | 1.39E-13 |
| UCN3    | -0.26203 | 1.56E-09 | 6.54E-09 |
| UCN     | -0.04698 | 2.87E-01 | 3.50E-01 |
| UCP1    | 0.130634 | 2.98E-03 | 5.54E-03 |
| UCP2    | -0.05824 | 1.87E-01 | 2.40E-01 |
| UCP3    | -0.26645 | 8.08E-10 | 3.50E-09 |
| UEVLD   | 0.10943  | 1.30E-02 | 2.16E-02 |
| UFC1    | -0.16815 | 1.26E-04 | 2.90E-04 |
| UFD1L   | 0.38264  | 2.11E-19 | 2.34E-18 |
| UFM1    | -0.05256 | 2.34E-01 | 2.92E-01 |
| UFSP1   | 0.028146 | 5.24E-01 | 5.88E-01 |
| UFSP2   | -0.16588 | 1.56E-04 | 3.53E-04 |
| UGCG    | 0.025318 | 5.66E-01 | 6.26E-01 |
| UGDH    | 0.199013 | 5.34E-06 | 1.48E-05 |
| UGGT1   | 0.229338 | 1.42E-07 | 4.79E-07 |
| UGGT2   | 0.189522 | 1.49E-05 | 3.90E-05 |
| UGP2    | 0.25425  | 4.85E-09 | 1.92E-08 |
| UGT1A10 | 0.038236 | 3.87E-01 | 4.53E-01 |
| UGT1A1  | 0.119733 | 6.52E-03 | 1.15E-02 |
| UGT1A3  | 0.184255 | 2.58E-05 | 6.53E-05 |
| UGT1A4  | 0.115952 | 8.44E-03 | 1.45E-02 |
| UGT1A5  | 0.102899 | 1.95E-02 | 3.13E-02 |

|           |          |           |           |
|-----------|----------|-----------|-----------|
| UGT1A6    | 0.094063 | 3.28E-02  | 5.03E-02  |
| UGT1A7    | 0.151009 | 5.85E-04  | 1.22E-03  |
| UGT1A8    | 0.045748 | 3.00E-01  | 3.64E-01  |
| UGT1A9    | 0.136433 | 1.91E-03  | 3.68E-03  |
| UGT2A1    | 0.038823 | 3.79E-01  | 4.46E-01  |
| UGT2A3    | -0.037   | 4.02E-01  | 4.68E-01  |
| UGT2B10   | 0.079696 | 7.08E-02  | 1.01E-01  |
| UGT2B11   | 0.050107 | 2.56E-01  | 3.17E-01  |
| UGT2B15   | -0.1973  | 6.45E-06  | 1.77E-05  |
| UGT2B28   | 0.019557 | 6.58E-01  | 7.11E-01  |
| UGT2B4    | 0.011163 | 8.00E-01  | 8.35E-01  |
| UGT2B7    | 0.145932 | 8.95E-04  | 1.81E-03  |
| UGT3A1    | 0.178716 | 4.53E-05  | 1.11E-04  |
| UGT3A2    | 0.163658 | 1.91E-04  | 4.28E-04  |
| UGT8      | 0.238582 | 4.24E-08  | 1.51E-07  |
| UHMK1     | 0.110824 | 1.18E-02  | 1.99E-02  |
| UHRF1BP1L | 0.296272 | 6.80E-12  | 3.65E-11  |
| UHRF1BP1  | 0.123209 | 5.11E-03  | 9.16E-03  |
| UHRF1     | 0.796677 | 2.92E-114 | 6.09E-112 |
| UHRF2     | 0.198198 | 5.84E-06  | 1.61E-05  |
| UIMC1     | 0.023767 | 5.90E-01  | 6.49E-01  |
| ULBP1     | 0.147098 | 8.13E-04  | 1.66E-03  |
| ULBP2     | 0.27733  | 1.51E-10  | 7.06E-10  |
| ULBP3     | 0.063495 | 1.50E-01  | 1.98E-01  |
| ULK1      | 0.066224 | 1.33E-01  | 1.78E-01  |
| ULK2      | -0.30465 | 1.60E-12  | 9.22E-12  |
| ULK3      | -0.16752 | 1.34E-04  | 3.06E-04  |
| ULK4      | -0.04507 | 3.07E-01  | 3.71E-01  |
| UMODL1    | 0.029942 | 4.98E-01  | 5.62E-01  |
| UMOD      | 0.106628 | 1.55E-02  | 2.54E-02  |
| UMPS      | 0.441493 | 5.58E-26  | 1.07E-24  |
| UNC119B   | -0.18259 | 3.06E-05  | 7.66E-05  |
| UNC119    | 0.08985  | 4.15E-02  | 6.23E-02  |
| UNC13A    | 0.094149 | 3.27E-02  | 5.01E-02  |
| UNC13B    | -0.47991 | 5.04E-31  | 1.38E-29  |
| UNC13C    | -0.1691  | 1.15E-04  | 2.66E-04  |
| UNC13D    | 0.084566 | 5.51E-02  | 8.06E-02  |
| UNC45A    | -0.10515 | 1.70E-02  | 2.76E-02  |
| UNC45B    | -0.43465 | 3.80E-25  | 6.78E-24  |
| UNC50     | -0.02976 | 5.00E-01  | 5.65E-01  |
| UNC5A     | 0.00996  | 8.22E-01  | 8.53E-01  |
| UNC5B     | -0.06222 | 1.59E-01  | 2.08E-01  |
| UNC5CL    | -0.11953 | 6.61E-03  | 1.16E-02  |
| UNC5C     | -0.18072 | 3.70E-05  | 9.17E-05  |

|         |          |          |          |
|---------|----------|----------|----------|
| UNC5D   | 0.153785 | 4.61E-04 | 9.73E-04 |
| UNC80   | -0.03854 | 3.83E-01 | 4.49E-01 |
| UNC93A  | 0.123266 | 5.09E-03 | 9.13E-03 |
| UNC93B1 | -0.27067 | 4.25E-10 | 1.90E-09 |
| UNG     | 0.625971 | 2.24E-57 | 1.85E-55 |
| UNKL    | -0.2044  | 2.91E-06 | 8.35E-06 |
| UNK     | 0.079256 | 7.23E-02 | 1.03E-01 |
| UOX     | -0.05538 | 2.10E-01 | 2.66E-01 |
| UPB1    | -0.1604  | 2.57E-04 | 5.65E-04 |
| UPF0639 | -0.05488 | 2.14E-01 | 2.70E-01 |
| UPF1    | -0.23213 | 9.93E-08 | 3.39E-07 |
| UPF2    | 0.014248 | 7.47E-01 | 7.90E-01 |
| UPF3A   | -0.22312 | 3.12E-07 | 1.01E-06 |
| UPF3B   | 0.26492  | 1.02E-09 | 4.35E-09 |
| UPK1A   | 0.240015 | 3.50E-08 | 1.25E-07 |
| UPK1B   | 0.119086 | 6.82E-03 | 1.19E-02 |
| UPK2    | 0.180002 | 3.98E-05 | 9.81E-05 |
| UPK3A   | -0.03453 | 4.34E-01 | 5.01E-01 |
| UPK3BL  | 0.011744 | 7.90E-01 | 8.27E-01 |
| UPK3B   | -0.12685 | 3.93E-03 | 7.18E-03 |
| UPP1    | 0.204638 | 2.84E-06 | 8.14E-06 |
| UPP2    | -0.15879 | 2.97E-04 | 6.47E-04 |
| UPRT    | -0.24856 | 1.08E-08 | 4.11E-08 |
| UQCC    | 0.058436 | 1.85E-01 | 2.39E-01 |
| UQCR10  | -0.02664 | 5.46E-01 | 6.09E-01 |
| UQCR11  | 0.067905 | 1.24E-01 | 1.67E-01 |
| UQCRB   | -0.00315 | 9.43E-01 | 9.55E-01 |
| UQCRC1  | 0.200921 | 4.32E-06 | 1.21E-05 |
| UQCRC2  | 0.017004 | 7.00E-01 | 7.49E-01 |
| UQCRFS1 | 0.283973 | 5.23E-11 | 2.55E-10 |
| UQCRHL  | 0.309637 | 6.62E-13 | 3.96E-12 |
| UQCRH   | 0.279687 | 1.04E-10 | 4.93E-10 |
| UQCRQ   | 0.070568 | 1.10E-01 | 1.50E-01 |
| URB1    | -0.00752 | 8.65E-01 | 8.90E-01 |
| URB2    | 0.38187  | 2.52E-19 | 2.78E-18 |
| URGCP   | -0.09737 | 2.71E-02 | 4.23E-02 |
| URM1    | 0.081806 | 6.36E-02 | 9.19E-02 |
| UROC1   | -0.06953 | 1.15E-01 | 1.56E-01 |
| UROD    | -0.05171 | 2.41E-01 | 3.01E-01 |
| UROS    | -0.09791 | 2.63E-02 | 4.11E-02 |
| USE1    | -0.17164 | 9.05E-05 | 2.12E-04 |
| USF1    | -0.06427 | 1.45E-01 | 1.92E-01 |
| USF2    | 0.001183 | 9.79E-01 | 9.84E-01 |
| USH1C   | 0.109491 | 1.29E-02 | 2.15E-02 |

|          |          |          |          |
|----------|----------|----------|----------|
| USH1G    | 0.146893 | 8.27E-04 | 1.68E-03 |
| USH2A    | -0.06744 | 1.26E-01 | 1.70E-01 |
| USHBP1   | -0.4183  | 3.13E-23 | 4.79E-22 |
| USMG5    | 0.228727 | 1.54E-07 | 5.15E-07 |
| USO1     | 0.049442 | 2.63E-01 | 3.24E-01 |
| USP10    | 0.229404 | 1.41E-07 | 4.75E-07 |
| USP11    | -0.06761 | 1.25E-01 | 1.69E-01 |
| USP12    | -0.01509 | 7.33E-01 | 7.77E-01 |
| USP13    | -0.0988  | 2.49E-02 | 3.92E-02 |
| USP14    | 0.478106 | 8.99E-31 | 2.44E-29 |
| USP15    | 0.334539 | 6.23E-15 | 4.51E-14 |
| USP16    | -0.11414 | 9.53E-03 | 1.62E-02 |
| USP17L2  | -0.1111  | 1.16E-02 | 1.95E-02 |
| USP17L6P | -0.00157 | 9.72E-01 | 9.78E-01 |
| USP17    | 0.003761 | 9.32E-01 | 9.46E-01 |
| USP18    | 0.306307 | 1.20E-12 | 6.96E-12 |
| USP19    | -0.25991 | 2.14E-09 | 8.78E-09 |
| USP1     | 0.465173 | 5.17E-29 | 1.24E-27 |
| USP20    | -0.28654 | 3.44E-11 | 1.71E-10 |
| USP21    | -0.11471 | 9.17E-03 | 1.57E-02 |
| USP22    | -0.12803 | 3.61E-03 | 6.63E-03 |
| USP24    | -0.14124 | 1.31E-03 | 2.59E-03 |
| USP25    | -0.10346 | 1.89E-02 | 3.03E-02 |
| USP26    | -0.07863 | 7.46E-02 | 1.06E-01 |
| USP27X   | -0.3239  | 4.82E-14 | 3.22E-13 |
| USP28    | 0.055955 | 2.05E-01 | 2.60E-01 |
| USP29    | -0.06599 | 1.35E-01 | 1.80E-01 |
| USP2     | -0.19736 | 6.41E-06 | 1.76E-05 |
| USP30    | -0.0525  | 2.34E-01 | 2.93E-01 |
| USP31    | 0.17838  | 4.68E-05 | 1.14E-04 |
| USP32    | 0.258973 | 2.45E-09 | 1.00E-08 |
| USP33    | 0.165392 | 1.63E-04 | 3.69E-04 |
| USP34    | -0.06852 | 1.20E-01 | 1.63E-01 |
| USP35    | 0.109684 | 1.28E-02 | 2.13E-02 |
| USP36    | -0.03025 | 4.93E-01 | 5.58E-01 |
| USP37    | 0.346784 | 5.34E-16 | 4.31E-15 |
| USP38    | 0.073161 | 9.72E-02 | 1.34E-01 |
| USP39    | 0.395748 | 9.34E-21 | 1.17E-19 |
| USP3     | 0.067765 | 1.25E-01 | 1.68E-01 |
| USP40    | -0.07403 | 9.33E-02 | 1.29E-01 |
| USP42    | 0.269116 | 5.39E-10 | 2.38E-09 |
| USP43    | -0.16819 | 1.26E-04 | 2.89E-04 |
| USP44    | -0.18295 | 2.95E-05 | 7.40E-05 |
| USP45    | 0.132438 | 2.60E-03 | 4.89E-03 |

|        |          |          |          |
|--------|----------|----------|----------|
| USP46  | 0.02107  | 6.33E-01 | 6.88E-01 |
| USP47  | -0.20026 | 4.65E-06 | 1.30E-05 |
| USP48  | -0.2006  | 4.48E-06 | 1.26E-05 |
| USP49  | 0.025792 | 5.59E-01 | 6.20E-01 |
| USP4   | -0.29715 | 5.85E-12 | 3.17E-11 |
| USP50  | -0.00175 | 9.68E-01 | 9.75E-01 |
| USP51  | -0.17714 | 5.30E-05 | 1.28E-04 |
| USP53  | -0.3306  | 1.34E-14 | 9.40E-14 |
| USP54  | -0.45893 | 3.44E-28 | 7.78E-27 |
| USP5   | 0.327225 | 2.56E-14 | 1.75E-13 |
| USP6NL | -0.00275 | 9.50E-01 | 9.61E-01 |
| USP6   | -0.10101 | 2.19E-02 | 3.47E-02 |
| USP7   | -0.11614 | 8.34E-03 | 1.43E-02 |
| USP8   | -0.09535 | 3.05E-02 | 4.70E-02 |
| USP9X  | 0.100849 | 2.21E-02 | 3.51E-02 |
| USP9Y  | -0.00782 | 8.59E-01 | 8.85E-01 |
| USPL1  | -0.118   | 7.35E-03 | 1.28E-02 |
| UST    | -0.35735 | 5.88E-17 | 5.23E-16 |
| UTF1   | -0.20377 | 3.13E-06 | 8.94E-06 |
| UTP11L | 0.343906 | 9.61E-16 | 7.53E-15 |
| UTP14A | 0.234925 | 6.89E-08 | 2.39E-07 |
| UTP14C | -0.09824 | 2.58E-02 | 4.03E-02 |
| UTP15  | 0.31352  | 3.29E-13 | 2.03E-12 |
| UTP18  | 0.471387 | 7.54E-30 | 1.91E-28 |
| UTP20  | 0.318051 | 1.44E-13 | 9.16E-13 |
| UTP23  | 0.144809 | 9.82E-04 | 1.98E-03 |
| UTP3   | -0.05919 | 1.80E-01 | 2.32E-01 |
| UTP6   | 0.510126 | 1.82E-35 | 6.43E-34 |
| UTRN   | -0.33035 | 1.41E-14 | 9.84E-14 |
| UTS2D  | -0.0921  | 3.67E-02 | 5.56E-02 |
| UTS2R  | 0.040228 | 3.62E-01 | 4.29E-01 |
| UTS2   | 0.056591 | 2.00E-01 | 2.55E-01 |
| UTY    | -0.0082  | 8.53E-01 | 8.80E-01 |
| UVRAG  | -0.10543 | 1.67E-02 | 2.72E-02 |
| UXS1   | -0.21631 | 7.20E-07 | 2.23E-06 |
| UXT    | 0.143186 | 1.12E-03 | 2.23E-03 |
| VAC14  | 0.083599 | 5.80E-02 | 8.44E-02 |
| VAMP1  | -0.18867 | 1.63E-05 | 4.25E-05 |
| VAMP2  | -0.62212 | 1.70E-56 | 1.36E-54 |
| VAMP3  | -0.12501 | 4.50E-03 | 8.13E-03 |
| VAMP4  | -0.12923 | 3.30E-03 | 6.11E-03 |
| VAMP5  | -0.07542 | 8.73E-02 | 1.22E-01 |
| VAMP7  | 0.167638 | 1.32E-04 | 3.03E-04 |
| VAMP8  | -0.1837  | 2.74E-05 | 6.90E-05 |

|         |          |          |          |
|---------|----------|----------|----------|
| VANGL1  | 0.381634 | 2.66E-19 | 2.92E-18 |
| VANGL2  | -0.1163  | 8.24E-03 | 1.42E-02 |
| VAPA    | -0.19901 | 5.34E-06 | 1.48E-05 |
| VAPB    | 0.253568 | 5.35E-09 | 2.11E-08 |
| VARS2   | -0.02109 | 6.33E-01 | 6.88E-01 |
| VARS    | 0.240106 | 3.46E-08 | 1.24E-07 |
| VASH1   | -0.16161 | 2.31E-04 | 5.11E-04 |
| VASH2   | 0.187526 | 1.84E-05 | 4.76E-05 |
| VASN    | -0.04407 | 3.18E-01 | 3.83E-01 |
| VASP    | 0.186588 | 2.03E-05 | 5.21E-05 |
| VAT1L   | 0.056408 | 2.01E-01 | 2.56E-01 |
| VAT1    | 0.168725 | 1.19E-04 | 2.75E-04 |
| VAV1    | -0.08711 | 4.82E-02 | 7.13E-02 |
| VAV2    | 0.055465 | 2.09E-01 | 2.65E-01 |
| VAV3    | 0.087815 | 4.64E-02 | 6.89E-02 |
| VAX1    | 0.287704 | 2.84E-11 | 1.43E-10 |
| VAX2    | 0.091163 | 3.86E-02 | 5.83E-02 |
| VBP1    | 0.407449 | 5.12E-22 | 7.05E-21 |
| VCAM1   | 0.115671 | 8.60E-03 | 1.48E-02 |
| VCAN    | 0.276945 | 1.60E-10 | 7.49E-10 |
| VCL     | 0.087818 | 4.64E-02 | 6.89E-02 |
| VCPIP1  | 0.06998  | 1.13E-01 | 1.53E-01 |
| VCP     | 0.206001 | 2.43E-06 | 7.01E-06 |
| VCX2    | 0.070623 | 1.09E-01 | 1.49E-01 |
| VCX3A   | 0.090294 | 4.05E-02 | 6.09E-02 |
| VCX3B   | 0.077187 | 8.01E-02 | 1.13E-01 |
| VCX     | 0.090502 | 4.01E-02 | 6.03E-02 |
| VCY     | 0.09596  | 2.94E-02 | 4.55E-02 |
| VDAC1   | 0.40772  | 4.78E-22 | 6.61E-21 |
| VDAC2   | 0.371019 | 2.98E-18 | 2.97E-17 |
| VDAC3   | 0.351817 | 1.89E-16 | 1.59E-15 |
| VDR     | -0.18008 | 3.95E-05 | 9.74E-05 |
| VEGFA   | 0.115614 | 8.64E-03 | 1.48E-02 |
| VEGFB   | -0.17201 | 8.73E-05 | 2.05E-04 |
| VEGFC   | 0.209727 | 1.58E-06 | 4.66E-06 |
| VENTXP1 | 0.122521 | 5.37E-03 | 9.58E-03 |
| VENTXP7 | 0.059711 | 1.76E-01 | 2.28E-01 |
| VENTX   | -0.25663 | 3.44E-09 | 1.38E-08 |
| VEPH1   | -0.31641 | 1.94E-13 | 1.22E-12 |
| VEZF1   | 0.009528 | 8.29E-01 | 8.59E-01 |
| VEZT    | 0.145659 | 9.16E-04 | 1.85E-03 |
| VGf     | 0.330935 | 1.26E-14 | 8.83E-14 |
| VGLL1   | -0.08107 | 6.60E-02 | 9.51E-02 |
| VGLL2   | 0.141564 | 1.28E-03 | 2.53E-03 |

|          |          |          |          |
|----------|----------|----------|----------|
| VGLL3    | -0.06214 | 1.59E-01 | 2.08E-01 |
| VGLL4    | -0.1714  | 9.26E-05 | 2.17E-04 |
| VHLL     | -0.00262 | 9.53E-01 | 9.62E-01 |
| VHL      | 0.022063 | 6.17E-01 | 6.74E-01 |
| VIL1     | 0.169632 | 1.10E-04 | 2.54E-04 |
| VILL     | -0.28019 | 9.60E-11 | 4.57E-10 |
| VIM      | -0.12005 | 6.38E-03 | 1.12E-02 |
| VIPAR    | 0.012734 | 7.73E-01 | 8.11E-01 |
| VIPR1    | -0.55986 | 8.01E-44 | 4.43E-42 |
| VIPR2    | -0.0953  | 3.06E-02 | 4.72E-02 |
| VIP      | -0.28878 | 2.38E-11 | 1.21E-10 |
| VIT      | -0.10971 | 1.27E-02 | 2.12E-02 |
| VKORC1L1 | -0.14991 | 6.42E-04 | 1.33E-03 |
| VKORC1   | -0.12078 | 6.06E-03 | 1.07E-02 |
| VLDLR    | -0.12714 | 3.85E-03 | 7.05E-03 |
| VMA21    | 0.24655  | 1.43E-08 | 5.36E-08 |
| VMAC     | -0.43226 | 7.35E-25 | 1.28E-23 |
| VMO1     | -0.1149  | 9.06E-03 | 1.55E-02 |
| VN1R1    | -0.22035 | 4.40E-07 | 1.40E-06 |
| VN1R2    | 0.011297 | 7.98E-01 | 8.33E-01 |
| VN1R4    | 0.009662 | 8.27E-01 | 8.57E-01 |
| VN1R5    | -0.1477  | 7.73E-04 | 1.58E-03 |
| VNN1     | 0.072373 | 1.01E-01 | 1.39E-01 |
| VNN2     | -0.01242 | 7.79E-01 | 8.16E-01 |
| VNN3     | -0.02813 | 5.24E-01 | 5.88E-01 |
| VOPP1    | 0.280212 | 9.56E-11 | 4.55E-10 |
| VPRBP    | -0.03421 | 4.39E-01 | 5.05E-01 |
| VPREB1   | 0.013035 | 7.68E-01 | 8.07E-01 |
| VPREB3   | -0.06857 | 1.20E-01 | 1.62E-01 |
| VPS11    | -0.30746 | 9.75E-13 | 5.74E-12 |
| VPS13A   | -0.26406 | 1.16E-09 | 4.91E-09 |
| VPS13B   | -0.17814 | 4.80E-05 | 1.17E-04 |
| VPS13C   | -0.31305 | 3.58E-13 | 2.20E-12 |
| VPS13D   | -0.4434  | 3.25E-26 | 6.35E-25 |
| VPS16    | -0.01793 | 6.85E-01 | 7.35E-01 |
| VPS18    | 0.076056 | 8.47E-02 | 1.19E-01 |
| VPS24    | -0.16527 | 1.65E-04 | 3.73E-04 |
| VPS25    | 0.341912 | 1.44E-15 | 1.10E-14 |
| VPS26A   | 0.232939 | 8.94E-08 | 3.07E-07 |
| VPS26B   | -0.23186 | 1.03E-07 | 3.51E-07 |
| VPS28    | -0.20352 | 3.22E-06 | 9.20E-06 |
| VPS29    | 0.369941 | 3.79E-18 | 3.74E-17 |
| VPS33A   | 0.514092 | 4.40E-36 | 1.61E-34 |
| VPS33B   | 0.146321 | 8.67E-04 | 1.76E-03 |

|         |          |          |          |
|---------|----------|----------|----------|
| VPS35   | 0.075147 | 8.85E-02 | 1.23E-01 |
| VPS36   | -0.3046  | 1.62E-12 | 9.31E-12 |
| VPS37A  | 0.045456 | 3.03E-01 | 3.67E-01 |
| VPS37B  | -0.01086 | 8.06E-01 | 8.40E-01 |
| VPS37C  | 0.130749 | 2.95E-03 | 5.50E-03 |
| VPS37D  | 0.140659 | 1.37E-03 | 2.70E-03 |
| VPS39   | -0.36088 | 2.75E-17 | 2.53E-16 |
| VPS41   | -0.06198 | 1.60E-01 | 2.10E-01 |
| VPS45   | 0.079656 | 7.09E-02 | 1.01E-01 |
| VPS4A   | -0.12319 | 5.12E-03 | 9.17E-03 |
| VPS4B   | 0.072297 | 1.01E-01 | 1.39E-01 |
| VPS52   | -0.13966 | 1.49E-03 | 2.91E-03 |
| VPS53   | -0.27011 | 4.63E-10 | 2.06E-09 |
| VPS54   | 0.144623 | 9.97E-04 | 2.00E-03 |
| VPS72   | 0.212648 | 1.12E-06 | 3.36E-06 |
| VPS8    | 0.028313 | 5.21E-01 | 5.85E-01 |
| VRK1    | 0.655427 | 1.56E-64 | 1.49E-62 |
| VRK2    | 0.60245  | 3.44E-52 | 2.46E-50 |
| VRK3    | -0.04166 | 3.45E-01 | 4.11E-01 |
| VSIG10L | -0.01111 | 8.01E-01 | 8.36E-01 |
| VSIG10  | 0.019747 | 6.55E-01 | 7.08E-01 |
| VSIG1   | -0.05292 | 2.31E-01 | 2.89E-01 |
| VSIG2   | -0.52201 | 2.45E-37 | 9.53E-36 |
| VSIG4   | -0.00862 | 8.45E-01 | 8.73E-01 |
| VSIG8   | -0.19483 | 8.45E-06 | 2.29E-05 |
| VSNL1   | -0.07075 | 1.09E-01 | 1.48E-01 |
| VSTM1   | -0.04303 | 3.30E-01 | 3.95E-01 |
| VSTM2A  | 0.06244  | 1.57E-01 | 2.06E-01 |
| VSTM2B  | 0.07468  | 9.05E-02 | 1.26E-01 |
| VSTM2L  | -0.04999 | 2.57E-01 | 3.19E-01 |
| VSX1    | 0.121082 | 5.94E-03 | 1.05E-02 |
| VSX2    | 0.041378 | 3.49E-01 | 4.15E-01 |
| VTA1    | 0.425285 | 4.89E-24 | 8.04E-23 |
| VTCN1   | -0.04102 | 3.53E-01 | 4.19E-01 |
| VTI1A   | 0.216977 | 6.65E-07 | 2.06E-06 |
| VTI1B   | 0.114579 | 9.26E-03 | 1.58E-02 |
| VTN     | 0.001318 | 9.76E-01 | 9.82E-01 |
| VWA1    | -0.29347 | 1.09E-11 | 5.73E-11 |
| VWA2    | -0.43013 | 1.32E-24 | 2.25E-23 |
| VWA3A   | -0.33149 | 1.13E-14 | 7.99E-14 |
| VWA3B   | -0.31789 | 1.48E-13 | 9.42E-13 |
| VWA5A   | -0.36997 | 3.77E-18 | 3.72E-17 |
| VWA5B1  | -0.15288 | 4.99E-04 | 1.05E-03 |
| VWA5B2  | 0.013685 | 7.57E-01 | 7.98E-01 |



|         |          |          |          |
|---------|----------|----------|----------|
| VWC2L   | -0.03066 | 4.88E-01 | 5.52E-01 |
| VWC2    | -0.234   | 7.78E-08 | 2.69E-07 |
| VWCE    | -0.07996 | 6.98E-02 | 1.00E-01 |
| VWDE    | 0.353648 | 1.28E-16 | 1.10E-15 |
| VWF     | -0.35611 | 7.64E-17 | 6.69E-16 |
| WAC     | 0.080831 | 6.68E-02 | 9.61E-02 |
| WAPAL   | 0.131157 | 2.86E-03 | 5.35E-03 |
| WARS2   | -0.03755 | 3.95E-01 | 4.62E-01 |
| WARS    | 0.298801 | 4.42E-12 | 2.42E-11 |
| WASF1   | 0.415158 | 7.10E-23 | 1.05E-21 |
| WASF2   | -0.00096 | 9.83E-01 | 9.87E-01 |
| WASF3   | -0.29213 | 1.37E-11 | 7.09E-11 |
| WASH2P  | -0.2694  | 5.17E-10 | 2.29E-09 |
| WASH3P  | -0.21445 | 9.01E-07 | 2.74E-06 |
| WASH5P  | -0.22031 | 4.43E-07 | 1.40E-06 |
| WASH7P  | -0.22558 | 2.29E-07 | 7.53E-07 |
| WASL    | 0.073795 | 9.43E-02 | 1.31E-01 |
| WAS     | -0.10814 | 1.41E-02 | 2.33E-02 |
| WBP11P1 | 0.333697 | 7.34E-15 | 5.28E-14 |
| WBP11   | 0.457047 | 6.04E-28 | 1.34E-26 |
| WBP1    | -0.15484 | 4.21E-04 | 8.94E-04 |
| WBP2NL  | -0.27081 | 4.16E-10 | 1.86E-09 |
| WBP2    | -0.21364 | 9.92E-07 | 3.00E-06 |
| WBP4    | -0.05723 | 1.95E-01 | 2.49E-01 |
| WBP5    | 0.075588 | 8.66E-02 | 1.21E-01 |
| WBSCR16 | 0.069656 | 1.14E-01 | 1.55E-01 |
| WBSCR17 | -0.43856 | 1.28E-25 | 2.38E-24 |
| WBSCR22 | 0.143034 | 1.13E-03 | 2.26E-03 |
| WBSCR26 | -0.24132 | 2.94E-08 | 1.06E-07 |
| WBSCR27 | -0.06297 | 1.54E-01 | 2.02E-01 |
| WBSCR28 | 0.262249 | 1.51E-09 | 6.34E-09 |
| WDFY1   | 0.187339 | 1.88E-05 | 4.85E-05 |
| WDFY2   | -0.1438  | 1.07E-03 | 2.13E-03 |
| WDFY3   | -0.26194 | 1.58E-09 | 6.62E-09 |
| WDFY4   | -0.20751 | 2.04E-06 | 5.95E-06 |
| WDHD1   | 0.707215 | 2.80E-79 | 3.42E-77 |
| WDR11   | -0.14294 | 1.14E-03 | 2.27E-03 |
| WDR12   | 0.528186 | 2.43E-38 | 1.01E-36 |
| WDR13   | -0.2155  | 7.95E-07 | 2.44E-06 |
| WDR16   | -0.28883 | 2.36E-11 | 1.20E-10 |
| WDR17   | -0.10154 | 2.12E-02 | 3.37E-02 |
| WDR18   | 0.198571 | 5.61E-06 | 1.55E-05 |
| WDR19   | -0.32533 | 3.68E-14 | 2.48E-13 |
| WDR1    | 0.161626 | 2.30E-04 | 5.10E-04 |

|        |          |          |          |
|--------|----------|----------|----------|
| WDR20  | -0.04155 | 3.47E-01 | 4.13E-01 |
| WDR24  | -0.21858 | 5.47E-07 | 1.71E-06 |
| WDR25  | -0.11573 | 8.57E-03 | 1.47E-02 |
| WDR26  | -0.17231 | 8.49E-05 | 2.00E-04 |
| WDR27  | -0.17922 | 4.30E-05 | 1.06E-04 |
| WDR31  | -0.13812 | 1.68E-03 | 3.26E-03 |
| WDR33  | -0.09848 | 2.54E-02 | 3.98E-02 |
| WDR34  | 0.198638 | 5.57E-06 | 1.54E-05 |
| WDR35  | -0.1138  | 9.75E-03 | 1.66E-02 |
| WDR36  | 0.162433 | 2.14E-04 | 4.76E-04 |
| WDR37  | -0.31542 | 2.33E-13 | 1.45E-12 |
| WDR38  | -0.23121 | 1.12E-07 | 3.80E-07 |
| WDR3   | 0.344106 | 9.23E-16 | 7.25E-15 |
| WDR41  | 0.102804 | 1.96E-02 | 3.15E-02 |
| WDR43  | 0.587087 | 4.99E-49 | 3.33E-47 |
| WDR44  | 0.102732 | 1.97E-02 | 3.16E-02 |
| WDR45L | 0.257191 | 3.17E-09 | 1.28E-08 |
| WDR45  | -0.11655 | 8.11E-03 | 1.40E-02 |
| WDR46  | 0.064908 | 1.41E-01 | 1.88E-01 |
| WDR47  | -0.15859 | 3.03E-04 | 6.58E-04 |
| WDR48  | -0.19951 | 5.05E-06 | 1.41E-05 |
| WDR49  | -0.16188 | 2.25E-04 | 5.00E-04 |
| WDR4   | 0.355947 | 7.91E-17 | 6.92E-16 |
| WDR52  | -0.30496 | 1.52E-12 | 8.77E-12 |
| WDR53  | 0.463914 | 7.60E-29 | 1.80E-27 |
| WDR54  | 0.087267 | 4.78E-02 | 7.07E-02 |
| WDR55  | -0.10324 | 1.91E-02 | 3.07E-02 |
| WDR59  | -0.24201 | 2.67E-08 | 9.70E-08 |
| WDR5B  | -0.15292 | 4.97E-04 | 1.04E-03 |
| WDR5   | 0.273064 | 2.94E-10 | 1.34E-09 |
| WDR60  | -0.15451 | 4.33E-04 | 9.18E-04 |
| WDR61  | -0.02301 | 6.02E-01 | 6.60E-01 |
| WDR62  | 0.610956 | 5.14E-54 | 3.83E-52 |
| WDR63  | -0.25418 | 4.89E-09 | 1.94E-08 |
| WDR64  | -0.0278  | 5.29E-01 | 5.92E-01 |
| WDR65  | -0.33935 | 2.40E-15 | 1.81E-14 |
| WDR66  | 0.037573 | 3.95E-01 | 4.62E-01 |
| WDR67  | 0.636718 | 6.74E-60 | 5.75E-58 |
| WDR69  | -0.00438 | 9.21E-01 | 9.37E-01 |
| WDR6   | -0.36612 | 8.82E-18 | 8.42E-17 |
| WDR70  | 0.164592 | 1.76E-04 | 3.95E-04 |
| WDR72  | 0.098171 | 2.59E-02 | 4.05E-02 |
| WDR73  | -0.07695 | 8.11E-02 | 1.14E-01 |
| WDR74  | 0.204025 | 3.04E-06 | 8.70E-06 |

|         |          |          |          |
|---------|----------|----------|----------|
| WDR75   | 0.515223 | 2.93E-36 | 1.08E-34 |
| WDR76   | 0.760304 | 3.48E-98 | 5.43E-96 |
| WDR77   | 0.154123 | 4.48E-04 | 9.47E-04 |
| WDR78   | -0.19063 | 1.33E-05 | 3.49E-05 |
| WDR7    | -0.11337 | 1.00E-02 | 1.70E-02 |
| WDR81   | -0.35491 | 9.85E-17 | 8.54E-16 |
| WDR82   | 0.018145 | 6.81E-01 | 7.31E-01 |
| WDR83   | -0.15592 | 3.83E-04 | 8.19E-04 |
| WDR85   | 0.073829 | 9.42E-02 | 1.31E-01 |
| WDR86   | -0.10747 | 1.47E-02 | 2.42E-02 |
| WDR87   | 0.014552 | 7.42E-01 | 7.85E-01 |
| WDR88   | 0.078153 | 7.64E-02 | 1.08E-01 |
| WDR89   | -0.10074 | 2.22E-02 | 3.53E-02 |
| WDR8    | 0.045473 | 3.03E-01 | 3.67E-01 |
| WDR90   | -0.1995  | 5.06E-06 | 1.41E-05 |
| WDR91   | -0.30917 | 7.20E-13 | 4.29E-12 |
| WDR92   | 0.092474 | 3.59E-02 | 5.46E-02 |
| WDR93   | -0.28459 | 4.73E-11 | 2.31E-10 |
| WDSUB1  | -0.00732 | 8.68E-01 | 8.93E-01 |
| WDTC1   | -0.41844 | 3.01E-23 | 4.62E-22 |
| WDYHV1  | 0.324222 | 4.54E-14 | 3.03E-13 |
| WEE1    | 0.031458 | 4.76E-01 | 5.42E-01 |
| WEE2    | -0.09329 | 3.43E-02 | 5.23E-02 |
| WFDC10A | 0.020173 | 6.48E-01 | 7.02E-01 |
| WFDC10B | 0.0169   | 7.02E-01 | 7.50E-01 |
| WFDC11  | -0.06605 | 1.34E-01 | 1.80E-01 |
| WFDC12  | -0.29695 | 6.06E-12 | 3.27E-11 |
| WFDC13  | -0.06722 | 1.28E-01 | 1.71E-01 |
| WFDC1   | -0.29308 | 1.17E-11 | 6.09E-11 |
| WFDC2   | -0.41953 | 2.26E-23 | 3.51E-22 |
| WFDC3   | 0.071846 | 1.03E-01 | 1.42E-01 |
| WFDC5   | -0.21749 | 6.25E-07 | 1.95E-06 |
| WFDC6   | -0.24637 | 1.47E-08 | 5.49E-08 |
| WFDC8   | -0.03018 | 4.94E-01 | 5.59E-01 |
| WFDC9   | 0.025097 | 5.70E-01 | 6.30E-01 |
| WFIKKN1 | -0.23583 | 6.11E-08 | 2.13E-07 |
| WFIKKN2 | -0.26741 | 6.99E-10 | 3.04E-09 |
| WFS1    | -0.29209 | 1.38E-11 | 7.14E-11 |
| WHAMML1 | -0.27332 | 2.82E-10 | 1.29E-09 |
| WHAMML2 | -0.16803 | 1.28E-04 | 2.93E-04 |
| WHAMM   | -0.34279 | 1.20E-15 | 9.34E-15 |
| WHSC1L1 | 0.066607 | 1.31E-01 | 1.76E-01 |
| WHSC1   | 0.467445 | 2.57E-29 | 6.29E-28 |
| WHSC2   | 0.109905 | 1.26E-02 | 2.10E-02 |

|        |          |          |          |
|--------|----------|----------|----------|
| WIBG   | 0.153868 | 4.58E-04 | 9.67E-04 |
| WIF1   | -0.47919 | 6.35E-31 | 1.74E-29 |
| WIPF1  | 0.056256 | 2.02E-01 | 2.58E-01 |
| WIPF2  | 0.058876 | 1.82E-01 | 2.35E-01 |
| WIPF3  | 0.024492 | 5.79E-01 | 6.39E-01 |
| WIPI1  | 0.110461 | 1.21E-02 | 2.03E-02 |
| WIPI2  | 0.143115 | 1.13E-03 | 2.24E-03 |
| WISP1  | 0.285157 | 4.31E-11 | 2.12E-10 |
| WISP2  | -0.19341 | 9.85E-06 | 2.64E-05 |
| WISP3  | 0.088041 | 4.58E-02 | 6.81E-02 |
| WIT1   | 0.245323 | 1.70E-08 | 6.31E-08 |
| WIZ    | 0.043002 | 3.30E-01 | 3.95E-01 |
| WLS    | -0.21393 | 9.59E-07 | 2.91E-06 |
| WNK1   | -0.18608 | 2.14E-05 | 5.48E-05 |
| WNK2   | 0.015216 | 7.30E-01 | 7.75E-01 |
| WNK3   | 0.227909 | 1.71E-07 | 5.68E-07 |
| WNK4   | 0.117522 | 7.59E-03 | 1.32E-02 |
| WNT10A | -0.08507 | 5.37E-02 | 7.86E-02 |
| WNT10B | 0.01536  | 7.28E-01 | 7.73E-01 |
| WNT11  | -0.36959 | 4.09E-18 | 4.02E-17 |
| WNT16  | 0.177188 | 5.27E-05 | 1.28E-04 |
| WNT1   | -0.11337 | 1.00E-02 | 1.70E-02 |
| WNT2B  | -0.37991 | 3.96E-19 | 4.26E-18 |
| WNT2   | -0.05927 | 1.79E-01 | 2.32E-01 |
| WNT3A  | -0.1948  | 8.48E-06 | 2.29E-05 |
| WNT3   | -0.05627 | 2.02E-01 | 2.58E-01 |
| WNT4   | -0.36914 | 4.53E-18 | 4.44E-17 |
| WNT5A  | -0.17632 | 5.74E-05 | 1.39E-04 |
| WNT5B  | -0.05789 | 1.90E-01 | 2.43E-01 |
| WNT6   | 0.035195 | 4.25E-01 | 4.92E-01 |
| WNT7A  | 0.033067 | 4.54E-01 | 5.20E-01 |
| WNT7B  | -0.19319 | 1.01E-05 | 2.70E-05 |
| WNT8A  | -0.04293 | 3.31E-01 | 3.96E-01 |
| WNT8B  | -0.12313 | 5.14E-03 | 9.21E-03 |
| WNT9A  | -0.04887 | 2.68E-01 | 3.30E-01 |
| WNT9B  | -0.24384 | 2.08E-08 | 7.65E-08 |
| WRAP53 | 0.221804 | 3.68E-07 | 1.18E-06 |
| WRB    | -0.13287 | 2.52E-03 | 4.74E-03 |
| WRNIP1 | 0.188079 | 1.74E-05 | 4.51E-05 |
| WRN    | 0.1793   | 4.27E-05 | 1.05E-04 |
| WSB1   | -0.15966 | 2.75E-04 | 6.02E-04 |
| WSB2   | 0.415785 | 6.03E-23 | 9.00E-22 |
| WSCD1  | -0.22488 | 2.51E-07 | 8.20E-07 |
| WSCD2  | -0.32235 | 6.45E-14 | 4.26E-13 |

|         |          |          |          |
|---------|----------|----------|----------|
| WT1     | 0.297107 | 5.90E-12 | 3.20E-11 |
| WTAP    | 0.23773  | 4.75E-08 | 1.68E-07 |
| WTIP    | -0.31634 | 1.97E-13 | 1.24E-12 |
| WWC1    | -0.30484 | 1.55E-12 | 8.94E-12 |
| WWC2    | -0.20928 | 1.66E-06 | 4.90E-06 |
| WWC3    | -0.37798 | 6.17E-19 | 6.51E-18 |
| WWOX    | -0.15731 | 3.39E-04 | 7.31E-04 |
| WWP1    | -0.04153 | 3.47E-01 | 4.13E-01 |
| WWP2    | -0.53241 | 4.87E-39 | 2.13E-37 |
| WWTR1   | 0.016365 | 7.11E-01 | 7.58E-01 |
| XAB2    | -0.12112 | 5.92E-03 | 1.05E-02 |
| XAF1    | 0.002204 | 9.60E-01 | 9.69E-01 |
| XAGE1D  | 0.056026 | 2.04E-01 | 2.60E-01 |
| XAGE2   | -0.14759 | 7.81E-04 | 1.59E-03 |
| XAGE3   | -0.0797  | 7.07E-02 | 1.01E-01 |
| XAGE5   | 0.094658 | 3.17E-02 | 4.87E-02 |
| XBP1    | -0.11224 | 1.08E-02 | 1.82E-02 |
| XCL1    | 0.21369  | 9.87E-07 | 2.99E-06 |
| XCL2    | 0.130666 | 2.97E-03 | 5.53E-03 |
| XCR1    | -0.26721 | 7.20E-10 | 3.13E-09 |
| XDH     | 0.049835 | 2.59E-01 | 3.20E-01 |
| XG      | 0.050816 | 2.50E-01 | 3.10E-01 |
| XIAP    | -0.17094 | 9.67E-05 | 2.26E-04 |
| XIRP1   | 0.336346 | 4.36E-15 | 3.22E-14 |
| XIRP2   | 0.058011 | 1.89E-01 | 2.42E-01 |
| XIST    | -0.09189 | 3.71E-02 | 5.62E-02 |
| XKR3    | 0.025717 | 5.60E-01 | 6.21E-01 |
| XKR4    | -0.0708  | 1.09E-01 | 1.48E-01 |
| XKR5    | 0.100844 | 2.21E-02 | 3.51E-02 |
| XKR6    | -0.14238 | 1.20E-03 | 2.37E-03 |
| XKR7    | 0.125939 | 4.20E-03 | 7.64E-03 |
| XKR8    | -0.30126 | 2.89E-12 | 1.62E-11 |
| XKR9    | 0.025461 | 5.64E-01 | 6.24E-01 |
| XKRX    | -0.15257 | 5.12E-04 | 1.07E-03 |
| XKRY2   | -0.00139 | 9.75E-01 | 9.81E-01 |
| XK      | -0.10793 | 1.43E-02 | 2.36E-02 |
| XPA     | -0.36975 | 3.95E-18 | 3.89E-17 |
| XPC     | -0.49531 | 3.12E-33 | 9.73E-32 |
| XPNPEP1 | 0.300605 | 3.24E-12 | 1.81E-11 |
| XPNPEP2 | -0.08851 | 4.47E-02 | 6.66E-02 |
| XPNPEP3 | 0.018095 | 6.82E-01 | 7.32E-01 |
| XPO1    | 0.552374 | 1.79E-42 | 9.37E-41 |
| XPO4    | 0.031296 | 4.79E-01 | 5.44E-01 |
| XPO5    | 0.421345 | 1.40E-23 | 2.22E-22 |

|          |          |          |          |
|----------|----------|----------|----------|
| XPO6     | 0.228292 | 1.63E-07 | 5.43E-07 |
| XPO7     | 0.102155 | 2.04E-02 | 3.26E-02 |
| XPOT     | 0.54997  | 4.77E-42 | 2.43E-40 |
| XPR1     | 0.019097 | 6.65E-01 | 7.17E-01 |
| XRCC1    | 0.014269 | 7.47E-01 | 7.89E-01 |
| XRCC2    | 0.727099 | 7.79E-86 | 1.01E-83 |
| XRCC3    | 0.410621 | 2.29E-22 | 3.24E-21 |
| XRCC4    | 0.225689 | 2.26E-07 | 7.44E-07 |
| XRCC5    | 0.426476 | 3.55E-24 | 5.90E-23 |
| XRCC6BP1 | 0.230771 | 1.18E-07 | 4.01E-07 |
| XRCC6    | 0.136763 | 1.87E-03 | 3.59E-03 |
| XRN1     | 0.177545 | 5.09E-05 | 1.24E-04 |
| XRN2     | 0.154706 | 4.26E-04 | 9.04E-04 |
| XRRA1    | -0.09771 | 2.66E-02 | 4.15E-02 |
| XYLB     | 0.293685 | 1.05E-11 | 5.54E-11 |
| XYLT1    | -0.05835 | 1.86E-01 | 2.39E-01 |
| XYLT2    | -0.10203 | 2.06E-02 | 3.28E-02 |
| YAF2     | 0.211802 | 1.23E-06 | 3.70E-06 |
| YAP1     | -0.28393 | 5.26E-11 | 2.57E-10 |
| YARS2    | 0.496499 | 2.08E-33 | 6.54E-32 |
| YARS     | 0.230499 | 1.23E-07 | 4.15E-07 |
| YBX1     | 0.430271 | 1.27E-24 | 2.17E-23 |
| YBX2     | 0.294884 | 8.60E-12 | 4.57E-11 |
| YDJC     | 0.271436 | 3.78E-10 | 1.70E-09 |
| YEATS2   | 0.403008 | 1.56E-21 | 2.07E-20 |
| YEATS4   | 0.361731 | 2.30E-17 | 2.13E-16 |
| YES1     | 0.35295  | 1.49E-16 | 1.27E-15 |
| YIF1A    | 0.145898 | 8.98E-04 | 1.82E-03 |
| YIF1B    | 0.301979 | 2.55E-12 | 1.44E-11 |
| YIPF1    | 0.024991 | 5.72E-01 | 6.31E-01 |
| YIPF2    | -0.0064  | 8.85E-01 | 9.07E-01 |
| YIPF3    | -0.22581 | 2.23E-07 | 7.34E-07 |
| YIPF4    | 0.31734  | 1.64E-13 | 1.04E-12 |
| YIPF5    | 0.060145 | 1.73E-01 | 2.25E-01 |
| YIPF6    | 0.244458 | 1.91E-08 | 7.06E-08 |
| YIPF7    | -0.04934 | 2.64E-01 | 3.25E-01 |
| YJEFN3   | -0.02636 | 5.51E-01 | 6.12E-01 |
| YKT6     | 0.451115 | 3.49E-27 | 7.31E-26 |
| YLPM1    | -0.05137 | 2.45E-01 | 3.05E-01 |
| YME1L1   | 0.349361 | 3.14E-16 | 2.59E-15 |
| YOD1     | -0.18127 | 3.50E-05 | 8.70E-05 |
| YPEL1    | -0.32482 | 4.05E-14 | 2.72E-13 |
| YPEL2    | -0.19895 | 5.37E-06 | 1.49E-05 |
| YPEL3    | -0.48664 | 5.63E-32 | 1.64E-30 |

|        |          |          |          |
|--------|----------|----------|----------|
| YPEL4  | 0.027586 | 5.32E-01 | 5.95E-01 |
| YPEL5  | -0.29201 | 1.39E-11 | 7.23E-11 |
| YRDC   | 0.332632 | 9.04E-15 | 6.44E-14 |
| YSK4   | -0.2558  | 3.88E-09 | 1.55E-08 |
| YTHDC1 | -0.17324 | 7.76E-05 | 1.84E-04 |
| YTHDC2 | -0.24234 | 2.55E-08 | 9.30E-08 |
| YTHDF1 | 0.063295 | 1.51E-01 | 1.99E-01 |
| YTHDF2 | -0.0863  | 5.03E-02 | 7.41E-02 |
| YTHDF3 | 0.123636 | 4.96E-03 | 8.91E-03 |
| YWHAB  | 0.225478 | 2.33E-07 | 7.63E-07 |
| YWHAE  | 0.191989 | 1.15E-05 | 3.05E-05 |
| YWHAG  | 0.528993 | 1.79E-38 | 7.53E-37 |
| YWHAH  | 0.168294 | 1.24E-04 | 2.86E-04 |
| YWHAQ  | 0.571246 | 6.11E-46 | 3.71E-44 |
| YWHAZ  | 0.404687 | 1.03E-21 | 1.38E-20 |
| YY1AP1 | -0.09348 | 3.39E-02 | 5.18E-02 |
| YY1    | 0.388975 | 4.76E-20 | 5.59E-19 |
| YY2    | 0.118404 | 7.15E-03 | 1.24E-02 |
| ZACN   | 0.094748 | 3.16E-02 | 4.85E-02 |
| ZADH2  | -0.09759 | 2.68E-02 | 4.17E-02 |
| ZAK    | 0.179052 | 4.38E-05 | 1.07E-04 |
| ZAN    | 0.080584 | 6.77E-02 | 9.72E-02 |
| ZAP70  | -0.13004 | 3.11E-03 | 5.78E-03 |
| ZAR1L  | 0.091368 | 3.82E-02 | 5.77E-02 |
| ZAR1   | -0.08268 | 6.08E-02 | 8.82E-02 |
| ZBBX   | -0.20042 | 4.57E-06 | 1.28E-05 |
| ZBED1  | 0.034049 | 4.41E-01 | 5.07E-01 |
| ZBED2  | 0.11628  | 8.26E-03 | 1.42E-02 |
| ZBED3  | -0.26496 | 1.01E-09 | 4.32E-09 |
| ZBED4  | 0.118435 | 7.13E-03 | 1.24E-02 |
| ZBED5  | -0.2642  | 1.13E-09 | 4.81E-09 |
| ZBP1   | 0.034657 | 4.33E-01 | 4.99E-01 |
| ZBTB10 | 0.196087 | 7.37E-06 | 2.01E-05 |
| ZBTB11 | 0.065379 | 1.38E-01 | 1.84E-01 |
| ZBTB12 | 0.062546 | 1.56E-01 | 2.05E-01 |
| ZBTB16 | -0.49358 | 5.58E-33 | 1.72E-31 |
| ZBTB17 | -0.02778 | 5.29E-01 | 5.93E-01 |
| ZBTB1  | -0.11724 | 7.74E-03 | 1.34E-02 |
| ZBTB20 | -0.08929 | 4.28E-02 | 6.40E-02 |
| ZBTB22 | -0.38889 | 4.85E-20 | 5.69E-19 |
| ZBTB24 | -0.04825 | 2.74E-01 | 3.36E-01 |
| ZBTB25 | -0.04332 | 3.27E-01 | 3.92E-01 |
| ZBTB26 | 0.123114 | 5.15E-03 | 9.22E-03 |
| ZBTB2  | 0.257361 | 3.10E-09 | 1.25E-08 |

|          |          |          |          |
|----------|----------|----------|----------|
| ZBTB32   | 0.030264 | 4.93E-01 | 5.58E-01 |
| ZBTB33   | 0.098518 | 2.54E-02 | 3.98E-02 |
| ZBTB34   | -0.17721 | 5.26E-05 | 1.28E-04 |
| ZBTB37   | -0.09501 | 3.11E-02 | 4.78E-02 |
| ZBTB38   | 0.072077 | 1.02E-01 | 1.40E-01 |
| ZBTB39   | 0.122536 | 5.36E-03 | 9.57E-03 |
| ZBTB3    | -0.35722 | 6.03E-17 | 5.36E-16 |
| ZBTB40   | -0.28168 | 7.56E-11 | 3.63E-10 |
| ZBTB41   | 0.060121 | 1.73E-01 | 2.25E-01 |
| ZBTB42   | -0.25313 | 5.69E-09 | 2.24E-08 |
| ZBTB43   | -0.29574 | 7.44E-12 | 3.98E-11 |
| ZBTB44   | -0.21818 | 5.74E-07 | 1.80E-06 |
| ZBTB45   | -0.11985 | 6.47E-03 | 1.14E-02 |
| ZBTB46   | -0.25594 | 3.80E-09 | 1.52E-08 |
| ZBTB47   | -0.28066 | 8.90E-11 | 4.25E-10 |
| ZBTB48   | -0.27692 | 1.61E-10 | 7.51E-10 |
| ZBTB49   | -0.19358 | 9.67E-06 | 2.59E-05 |
| ZBTB4    | -0.66531 | 4.06E-67 | 4.09E-65 |
| ZBTB5    | -0.03315 | 4.53E-01 | 5.19E-01 |
| ZBTB6    | 0.073671 | 9.49E-02 | 1.31E-01 |
| ZBTB7A   | -0.23305 | 8.80E-08 | 3.02E-07 |
| ZBTB7B   | -0.14769 | 7.74E-04 | 1.58E-03 |
| ZBTB7C   | -0.38893 | 4.81E-20 | 5.65E-19 |
| ZBTB8A   | -0.10879 | 1.35E-02 | 2.24E-02 |
| ZBTB8B   | 0.258313 | 2.70E-09 | 1.10E-08 |
| ZBTB8OS  | 0.11009  | 1.24E-02 | 2.07E-02 |
| ZBTB9    | 0.13846  | 1.63E-03 | 3.17E-03 |
| ZC3H10   | -0.05611 | 2.04E-01 | 2.59E-01 |
| ZC3H11A  | -0.23933 | 3.84E-08 | 1.37E-07 |
| ZC3H12A  | 0.033196 | 4.52E-01 | 5.18E-01 |
| ZC3H12B  | -0.25544 | 4.09E-09 | 1.63E-08 |
| ZC3H12C  | -0.06364 | 1.49E-01 | 1.97E-01 |
| ZC3H12D  | -0.17922 | 4.31E-05 | 1.06E-04 |
| ZC3H13   | -0.04067 | 3.57E-01 | 4.23E-01 |
| ZC3H14   | -0.01027 | 8.16E-01 | 8.48E-01 |
| ZC3H15   | 0.535834 | 1.30E-39 | 5.87E-38 |
| ZC3H18   | 0.07657  | 8.26E-02 | 1.16E-01 |
| ZC3H3    | 0.05298  | 2.30E-01 | 2.88E-01 |
| ZC3H4    | -0.13046 | 3.02E-03 | 5.61E-03 |
| ZC3H6    | -0.39577 | 9.29E-21 | 1.16E-19 |
| ZC3H7A   | -0.42093 | 1.56E-23 | 2.45E-22 |
| ZC3H7B   | -0.30708 | 1.04E-12 | 6.11E-12 |
| ZC3H8    | 0.475909 | 1.81E-30 | 4.79E-29 |
| ZC3HAV1L | 0.285631 | 3.99E-11 | 1.97E-10 |



|         |          |          |          |
|---------|----------|----------|----------|
| ZC3HAV1 | 0.065471 | 1.38E-01 | 1.84E-01 |
| ZC3HC1  | 0.418864 | 2.70E-23 | 4.15E-22 |
| ZC4H2   | -0.00365 | 9.34E-01 | 9.48E-01 |
| ZCCHC10 | -0.06338 | 1.51E-01 | 1.99E-01 |
| ZCCHC11 | 0.052279 | 2.36E-01 | 2.95E-01 |
| ZCCHC12 | -0.05578 | 2.06E-01 | 2.62E-01 |
| ZCCHC13 | 0.112996 | 1.03E-02 | 1.74E-02 |
| ZCCHC14 | -0.29259 | 1.27E-11 | 6.60E-11 |
| ZCCHC16 | -0.07589 | 8.53E-02 | 1.20E-01 |
| ZCCHC17 | 0.122961 | 5.20E-03 | 9.31E-03 |
| ZCCHC18 | -0.12284 | 5.25E-03 | 9.38E-03 |
| ZCCHC24 | -0.41177 | 1.70E-22 | 2.44E-21 |
| ZCCHC2  | -0.09635 | 2.88E-02 | 4.46E-02 |
| ZCCHC3  | -0.06147 | 1.64E-01 | 2.14E-01 |
| ZCCHC4  | 0.12365  | 4.95E-03 | 8.91E-03 |
| ZCCHC5  | -0.0428  | 3.32E-01 | 3.98E-01 |
| ZCCHC6  | -0.06005 | 1.74E-01 | 2.25E-01 |
| ZCCHC7  | 0.183258 | 2.86E-05 | 7.19E-05 |
| ZCCHC8  | 0.27224  | 3.34E-10 | 1.51E-09 |
| ZCCHC9  | 0.240978 | 3.07E-08 | 1.11E-07 |
| ZCRB1   | 0.203993 | 3.05E-06 | 8.73E-06 |
| ZCWPW1  | -0.29697 | 6.04E-12 | 3.27E-11 |
| ZCWPW2  | -0.5011  | 4.31E-34 | 1.42E-32 |
| ZDBF2   | 0.140887 | 1.35E-03 | 2.66E-03 |
| ZDHHC11 | -0.33193 | 1.04E-14 | 7.35E-14 |
| ZDHHC12 | 0.109754 | 1.27E-02 | 2.12E-02 |
| ZDHHC13 | 0.136068 | 1.97E-03 | 3.78E-03 |
| ZDHHC14 | 0.07936  | 7.20E-02 | 1.03E-01 |
| ZDHHC15 | -0.30914 | 7.23E-13 | 4.31E-12 |
| ZDHHC16 | -0.33994 | 2.13E-15 | 1.61E-14 |
| ZDHHC17 | -0.01084 | 8.06E-01 | 8.40E-01 |
| ZDHHC18 | 0.199631 | 4.99E-06 | 1.39E-05 |
| ZDHHC19 | 0.032631 | 4.60E-01 | 5.26E-01 |
| ZDHHC1  | -0.51047 | 1.61E-35 | 5.73E-34 |
| ZDHHC20 | 0.1551   | 4.11E-04 | 8.75E-04 |
| ZDHHC21 | -0.13209 | 2.67E-03 | 5.01E-03 |
| ZDHHC22 | 0.127993 | 3.62E-03 | 6.65E-03 |
| ZDHHC23 | 0.098541 | 2.53E-02 | 3.97E-02 |
| ZDHHC24 | -0.03566 | 4.19E-01 | 4.86E-01 |
| ZDHHC2  | -0.19606 | 7.39E-06 | 2.01E-05 |
| ZDHHC3  | -0.27214 | 3.39E-10 | 1.53E-09 |
| ZDHHC4  | 0.039166 | 3.75E-01 | 4.41E-01 |
| ZDHHC5  | 0.12336  | 5.06E-03 | 9.07E-03 |
| ZDHHC6  | 0.086919 | 4.87E-02 | 7.19E-02 |

|            |          |          |          |
|------------|----------|----------|----------|
| ZDHHC7     | -0.38838 | 5.47E-20 | 6.38E-19 |
| ZDHHC8P1   | -0.25993 | 2.13E-09 | 8.76E-09 |
| ZDHHC8     | -0.21435 | 9.12E-07 | 2.77E-06 |
| ZDHHC9     | -0.23568 | 6.24E-08 | 2.17E-07 |
| ZEB1       | -0.21458 | 8.88E-07 | 2.70E-06 |
| ZEB2       | -0.16467 | 1.74E-04 | 3.93E-04 |
| ZER1       | -0.42771 | 2.55E-24 | 4.28E-23 |
| ZFAND1     | 0.147055 | 8.16E-04 | 1.66E-03 |
| ZFAND2A    | 0.323145 | 5.56E-14 | 3.69E-13 |
| ZFAND2B    | -0.19652 | 7.03E-06 | 1.92E-05 |
| ZFAND3     | -0.034   | 4.41E-01 | 5.08E-01 |
| ZFAND5     | -0.32382 | 4.89E-14 | 3.26E-13 |
| ZFAND6     | -0.02441 | 5.80E-01 | 6.40E-01 |
| ZFATAS     | -0.03023 | 4.94E-01 | 5.58E-01 |
| ZFAT       | -0.06712 | 1.28E-01 | 1.72E-01 |
| ZFC3H1     | -0.04108 | 3.52E-01 | 4.18E-01 |
| ZFHX3      | -0.24931 | 9.77E-09 | 3.73E-08 |
| ZFHX4      | 0.169189 | 1.14E-04 | 2.64E-04 |
| ZFP106     | -0.19435 | 8.90E-06 | 2.40E-05 |
| ZFP112     | -0.07089 | 1.08E-01 | 1.48E-01 |
| ZFP14      | -0.22019 | 4.49E-07 | 1.42E-06 |
| ZFP161     | -0.12759 | 3.73E-03 | 6.83E-03 |
| ZFP1       | 0.003082 | 9.44E-01 | 9.56E-01 |
| ZFP28      | -0.10453 | 1.77E-02 | 2.86E-02 |
| ZFP2       | -0.52793 | 2.68E-38 | 1.11E-36 |
| ZFP30      | 0.146521 | 8.53E-04 | 1.73E-03 |
| ZFP36L1    | -0.21093 | 1.37E-06 | 4.07E-06 |
| ZFP36L2    | -0.14281 | 1.16E-03 | 2.30E-03 |
| ZFP36      | -0.33328 | 7.97E-15 | 5.70E-14 |
| ZFP37      | -0.00477 | 9.14E-01 | 9.31E-01 |
| ZFP3       | -0.34827 | 3.93E-16 | 3.21E-15 |
| ZFP41      | -0.14024 | 1.42E-03 | 2.79E-03 |
| ZFP42      | 0.024779 | 5.75E-01 | 6.34E-01 |
| ZFP57      | 0.1441   | 1.04E-03 | 2.09E-03 |
| ZFP62      | -0.18675 | 2.00E-05 | 5.13E-05 |
| ZFP64      | 0.247136 | 1.32E-08 | 4.97E-08 |
| ZFP82      | 0.039425 | 3.72E-01 | 4.38E-01 |
| ZFP90      | -0.25896 | 2.45E-09 | 1.00E-08 |
| ZFP91-CNTF | 0.091543 | 3.78E-02 | 5.72E-02 |
| ZFP91      | 0.213808 | 9.73E-07 | 2.95E-06 |
| ZFP92      | -0.1989  | 5.41E-06 | 1.50E-05 |
| ZFPL1      | 0.145264 | 9.46E-04 | 1.91E-03 |
| ZFPM1      | -0.2475  | 1.26E-08 | 4.73E-08 |
| ZFPM2      | -0.19067 | 1.32E-05 | 3.48E-05 |

|          |          |          |          |
|----------|----------|----------|----------|
| ZFR2     | -0.0439  | 3.20E-01 | 3.85E-01 |
| ZFR      | 0.30885  | 7.62E-13 | 4.53E-12 |
| ZFX      | -0.09633 | 2.88E-02 | 4.46E-02 |
| ZFYVE16  | -0.17264 | 8.22E-05 | 1.94E-04 |
| ZFYVE19  | -0.01787 | 6.86E-01 | 7.35E-01 |
| ZFYVE1   | -0.15279 | 5.02E-04 | 1.05E-03 |
| ZFYVE20  | -0.38576 | 1.02E-19 | 1.16E-18 |
| ZFYVE21  | -0.25972 | 2.19E-09 | 9.01E-09 |
| ZFYVE26  | -0.08868 | 4.43E-02 | 6.60E-02 |
| ZFYVE27  | -0.22216 | 3.52E-07 | 1.13E-06 |
| ZFYVE28  | -0.29481 | 8.71E-12 | 4.62E-11 |
| ZFYVE9   | -0.11722 | 7.75E-03 | 1.34E-02 |
| ZFY      | 0.024091 | 5.85E-01 | 6.44E-01 |
| ZG16B    | 0.030431 | 4.91E-01 | 5.56E-01 |
| ZG16     | 0.085701 | 5.19E-02 | 7.63E-02 |
| ZGLP1    | -0.16455 | 1.76E-04 | 3.97E-04 |
| ZGPAT    | -0.08972 | 4.18E-02 | 6.27E-02 |
| ZHX1     | -0.00847 | 8.48E-01 | 8.75E-01 |
| ZHX2     | -0.24455 | 1.89E-08 | 6.98E-08 |
| ZHX3     | -0.20865 | 1.79E-06 | 5.26E-06 |
| ZIC1     | 0.173764 | 7.37E-05 | 1.75E-04 |
| ZIC2     | 0.257201 | 3.17E-09 | 1.28E-08 |
| ZIC3     | 0.090313 | 4.05E-02 | 6.09E-02 |
| ZIC4     | 0.188687 | 1.63E-05 | 4.24E-05 |
| ZIC5     | 0.251478 | 7.19E-09 | 2.79E-08 |
| ZIK1     | -0.01566 | 7.23E-01 | 7.69E-01 |
| ZIM2     | -0.00131 | 9.76E-01 | 9.82E-01 |
| ZIM3     | 0.063402 | 1.51E-01 | 1.99E-01 |
| ZKSCAN1  | 0.177369 | 5.18E-05 | 1.26E-04 |
| ZKSCAN2  | -0.07678 | 8.17E-02 | 1.15E-01 |
| ZKSCAN3  | -0.06146 | 1.64E-01 | 2.14E-01 |
| ZKSCAN4  | 0.009823 | 8.24E-01 | 8.55E-01 |
| ZKSCAN5  | 0.26424  | 1.13E-09 | 4.78E-09 |
| ZMAT1    | -0.43689 | 2.04E-25 | 3.72E-24 |
| ZMAT2    | -0.06586 | 1.36E-01 | 1.81E-01 |
| ZMAT3    | -0.03936 | 3.73E-01 | 4.39E-01 |
| ZMAT4    | 0.159715 | 2.74E-04 | 5.99E-04 |
| ZMAT5    | -0.12532 | 4.39E-03 | 7.97E-03 |
| ZMIZ1    | -0.28864 | 2.44E-11 | 1.23E-10 |
| ZMIZ2    | 0.036751 | 4.05E-01 | 4.72E-01 |
| ZMPSTE24 | 0.160567 | 2.53E-04 | 5.57E-04 |
| ZMYM1    | 0.20698  | 2.17E-06 | 6.30E-06 |
| ZMYM2    | 0.036088 | 4.14E-01 | 4.80E-01 |
| ZMYM3    | -0.133   | 2.49E-03 | 4.69E-03 |

|         |          |          |          |
|---------|----------|----------|----------|
| ZMYM4   | 0.027309 | 5.36E-01 | 5.99E-01 |
| ZMYM5   | -0.1216  | 5.73E-03 | 1.02E-02 |
| ZMYM6   | -0.20054 | 4.51E-06 | 1.27E-05 |
| ZMYND10 | -0.295   | 8.43E-12 | 4.48E-11 |
| ZMYND11 | -0.32274 | 6.00E-14 | 3.97E-13 |
| ZMYND12 | -0.43625 | 2.43E-25 | 4.43E-24 |
| ZMYND15 | -0.45416 | 1.42E-27 | 3.08E-26 |
| ZMYND17 | -0.22025 | 4.46E-07 | 1.41E-06 |
| ZMYND19 | 0.272079 | 3.42E-10 | 1.55E-09 |
| ZMYND8  | -0.00413 | 9.25E-01 | 9.40E-01 |
| ZNF100  | 0.018979 | 6.67E-01 | 7.19E-01 |
| ZNF101  | 0.101896 | 2.07E-02 | 3.31E-02 |
| ZNF107  | 0.204979 | 2.73E-06 | 7.84E-06 |
| ZNF10   | -0.21689 | 6.72E-07 | 2.08E-06 |
| ZNF114  | 0.203973 | 3.06E-06 | 8.75E-06 |
| ZNF117  | -0.31394 | 3.05E-13 | 1.89E-12 |
| ZNF121  | 0.033512 | 4.48E-01 | 5.14E-01 |
| ZNF124  | -0.02763 | 5.32E-01 | 5.95E-01 |
| ZNF12   | 0.077711 | 7.81E-02 | 1.11E-01 |
| ZNF131  | 0.335887 | 4.78E-15 | 3.51E-14 |
| ZNF132  | -0.31921 | 1.16E-13 | 7.46E-13 |
| ZNF133  | -0.11226 | 1.08E-02 | 1.82E-02 |
| ZNF134  | -0.02446 | 5.80E-01 | 6.39E-01 |
| ZNF135  | -0.08145 | 6.48E-02 | 9.34E-02 |
| ZNF136  | -0.1976  | 6.25E-06 | 1.72E-05 |
| ZNF137  | -0.18199 | 3.26E-05 | 8.11E-05 |
| ZNF138  | 0.237253 | 5.06E-08 | 1.78E-07 |
| ZNF140  | 0.096604 | 2.84E-02 | 4.40E-02 |
| ZNF141  | -0.11362 | 9.87E-03 | 1.68E-02 |
| ZNF142  | -0.00734 | 8.68E-01 | 8.92E-01 |
| ZNF143  | 0.289457 | 2.13E-11 | 1.08E-10 |
| ZNF146  | 0.313624 | 3.23E-13 | 2.00E-12 |
| ZNF148  | 0.112804 | 1.04E-02 | 1.76E-02 |
| ZNF14   | -0.2282  | 1.65E-07 | 5.49E-07 |
| ZNF154  | -0.25174 | 6.93E-09 | 2.70E-08 |
| ZNF155  | -0.13159 | 2.77E-03 | 5.18E-03 |
| ZNF157  | 0.019335 | 6.62E-01 | 7.14E-01 |
| ZNF160  | -0.23077 | 1.18E-07 | 4.02E-07 |
| ZNF165  | 0.10417  | 1.80E-02 | 2.92E-02 |
| ZNF167  | -0.2592  | 2.37E-09 | 9.69E-09 |
| ZNF169  | -0.23336 | 8.46E-08 | 2.91E-07 |
| ZNF16   | -0.03091 | 4.84E-01 | 5.49E-01 |
| ZNF174  | -0.21869 | 5.40E-07 | 1.69E-06 |
| ZNF175  | -0.19719 | 6.53E-06 | 1.79E-05 |

|         |          |          |          |
|---------|----------|----------|----------|
| ZNF177  | -0.17795 | 4.89E-05 | 1.19E-04 |
| ZNF17   | -0.20028 | 4.64E-06 | 1.30E-05 |
| ZNF180  | 0.020177 | 6.48E-01 | 7.02E-01 |
| ZNF181  | -0.18526 | 2.33E-05 | 5.93E-05 |
| ZNF182  | -0.09265 | 3.55E-02 | 5.41E-02 |
| ZNF184  | -0.00249 | 9.55E-01 | 9.64E-01 |
| ZNF185  | 0.101777 | 2.09E-02 | 3.33E-02 |
| ZNF187  | -0.15193 | 5.41E-04 | 1.13E-03 |
| ZNF189  | -0.18348 | 2.80E-05 | 7.03E-05 |
| ZNF18   | -0.25294 | 5.84E-09 | 2.29E-08 |
| ZNF192  | -0.13982 | 1.47E-03 | 2.87E-03 |
| ZNF193  | -0.06675 | 1.30E-01 | 1.75E-01 |
| ZNF195  | 0.098417 | 2.55E-02 | 4.00E-02 |
| ZNF197  | -0.10375 | 1.85E-02 | 2.98E-02 |
| ZNF19   | -0.47332 | 4.11E-30 | 1.06E-28 |
| ZNF200  | 0.256127 | 3.70E-09 | 1.48E-08 |
| ZNF202  | -0.00218 | 9.61E-01 | 9.69E-01 |
| ZNF204P | -0.4063  | 6.85E-22 | 9.34E-21 |
| ZNF205  | -0.15507 | 4.12E-04 | 8.77E-04 |
| ZNF207  | 0.332077 | 1.01E-14 | 7.15E-14 |
| ZNF208  | -0.01519 | 7.31E-01 | 7.76E-01 |
| ZNF20   | -0.24918 | 9.95E-09 | 3.79E-08 |
| ZNF211  | -0.31792 | 1.47E-13 | 9.39E-13 |
| ZNF212  | 0.041122 | 3.52E-01 | 4.18E-01 |
| ZNF213  | -0.30898 | 7.44E-13 | 4.43E-12 |
| ZNF214  | -0.30517 | 1.46E-12 | 8.45E-12 |
| ZNF215  | 0.065514 | 1.38E-01 | 1.83E-01 |
| ZNF217  | 0.087652 | 4.68E-02 | 6.94E-02 |
| ZNF219  | -0.30834 | 8.34E-13 | 4.94E-12 |
| ZNF221  | 0.097023 | 2.77E-02 | 4.30E-02 |
| ZNF222  | 0.05007  | 2.57E-01 | 3.18E-01 |
| ZNF223  | -0.08659 | 4.95E-02 | 7.31E-02 |
| ZNF224  | -0.26637 | 8.18E-10 | 3.54E-09 |
| ZNF225  | -0.14277 | 1.16E-03 | 2.30E-03 |
| ZNF226  | -0.11067 | 1.20E-02 | 2.00E-02 |
| ZNF227  | 0.036398 | 4.10E-01 | 4.76E-01 |
| ZNF229  | 0.187091 | 1.93E-05 | 4.97E-05 |
| ZNF22   | -0.03286 | 4.57E-01 | 5.23E-01 |
| ZNF230  | -0.08381 | 5.73E-02 | 8.35E-02 |
| ZNF232  | 0.01457  | 7.42E-01 | 7.85E-01 |
| ZNF233  | -0.11269 | 1.05E-02 | 1.77E-02 |
| ZNF234  | -0.07327 | 9.67E-02 | 1.34E-01 |
| ZNF235  | -0.0426  | 3.35E-01 | 4.00E-01 |
| ZNF236  | -0.10493 | 1.72E-02 | 2.79E-02 |

|         |          |          |          |
|---------|----------|----------|----------|
| ZNF238  | -0.42119 | 1.46E-23 | 2.30E-22 |
| ZNF239  | 0.206394 | 2.32E-06 | 6.72E-06 |
| ZNF23   | -0.30881 | 7.67E-13 | 4.56E-12 |
| ZNF248  | -0.27242 | 3.25E-10 | 1.47E-09 |
| ZNF24   | -0.10241 | 2.01E-02 | 3.22E-02 |
| ZNF250  | -0.282   | 7.18E-11 | 3.46E-10 |
| ZNF251  | -0.11152 | 1.13E-02 | 1.91E-02 |
| ZNF252  | -0.09668 | 2.83E-02 | 4.38E-02 |
| ZNF253  | -0.16219 | 2.19E-04 | 4.86E-04 |
| ZNF254  | -0.24013 | 3.45E-08 | 1.24E-07 |
| ZNF256  | 0.1096   | 1.28E-02 | 2.14E-02 |
| ZNF257  | 0.119558 | 6.60E-03 | 1.16E-02 |
| ZNF259  | 0.399662 | 3.58E-21 | 4.63E-20 |
| ZNF25   | -0.39173 | 2.47E-20 | 2.98E-19 |
| ZNF260  | 0.181773 | 3.33E-05 | 8.28E-05 |
| ZNF263  | -0.25504 | 4.33E-09 | 1.72E-08 |
| ZNF264  | -0.31566 | 2.23E-13 | 1.40E-12 |
| ZNF266  | -0.19067 | 1.32E-05 | 3.48E-05 |
| ZNF267  | 0.249754 | 9.17E-09 | 3.52E-08 |
| ZNF268  | 0.097206 | 2.74E-02 | 4.26E-02 |
| ZNF26   | 0.202354 | 3.67E-06 | 1.04E-05 |
| ZNF271  | 0.03789  | 3.91E-01 | 4.58E-01 |
| ZNF273  | 0.168017 | 1.28E-04 | 2.93E-04 |
| ZNF274  | -0.05618 | 2.03E-01 | 2.58E-01 |
| ZNF275  | -0.18839 | 1.68E-05 | 4.37E-05 |
| ZNF276  | -0.37191 | 2.44E-18 | 2.46E-17 |
| ZNF277  | 0.010122 | 8.19E-01 | 8.51E-01 |
| ZNF280A | 0.327288 | 2.53E-14 | 1.73E-13 |
| ZNF280B | 0.189858 | 1.44E-05 | 3.77E-05 |
| ZNF280C | 0.165446 | 1.62E-04 | 3.67E-04 |
| ZNF280D | -0.26844 | 5.98E-10 | 2.63E-09 |
| ZNF281  | -0.01659 | 7.07E-01 | 7.55E-01 |
| ZNF282  | 0.093212 | 3.44E-02 | 5.25E-02 |
| ZNF283  | 0.084805 | 5.44E-02 | 7.97E-02 |
| ZNF284  | 0.025796 | 5.59E-01 | 6.20E-01 |
| ZNF285  | -0.0113  | 7.98E-01 | 8.33E-01 |
| ZNF286A | 0.277158 | 1.55E-10 | 7.25E-10 |
| ZNF286B | 0.036325 | 4.11E-01 | 4.77E-01 |
| ZNF287  | -0.10582 | 1.63E-02 | 2.66E-02 |
| ZNF28   | 0.111154 | 1.16E-02 | 1.95E-02 |
| ZNF292  | 0.070396 | 1.11E-01 | 1.51E-01 |
| ZNF295  | -0.10203 | 2.06E-02 | 3.28E-02 |
| ZNF296  | 0.001395 | 9.75E-01 | 9.81E-01 |
| ZNF2    | -0.12028 | 6.28E-03 | 1.11E-02 |

|         |          |          |          |
|---------|----------|----------|----------|
| ZNF300  | 0.21384  | 9.69E-07 | 2.94E-06 |
| ZNF302  | -0.15807 | 3.17E-04 | 6.87E-04 |
| ZNF304  | -0.11874 | 6.98E-03 | 1.22E-02 |
| ZNF30   | -0.02022 | 6.47E-01 | 7.01E-01 |
| ZNF311  | -0.10366 | 1.86E-02 | 3.00E-02 |
| ZNF317  | 0.013898 | 7.53E-01 | 7.94E-01 |
| ZNF318  | -0.06218 | 1.59E-01 | 2.08E-01 |
| ZNF319  | -0.32904 | 1.81E-14 | 1.25E-13 |
| ZNF320  | -0.17074 | 9.87E-05 | 2.30E-04 |
| ZNF321  | -0.34924 | 3.22E-16 | 2.65E-15 |
| ZNF322A | -0.11785 | 7.42E-03 | 1.29E-02 |
| ZNF322B | -0.103   | 1.94E-02 | 3.11E-02 |
| ZNF323  | -0.25086 | 7.85E-09 | 3.03E-08 |
| ZNF324B | -0.10778 | 1.44E-02 | 2.38E-02 |
| ZNF324  | -0.22641 | 2.07E-07 | 6.82E-07 |
| ZNF326  | 0.215645 | 7.81E-07 | 2.40E-06 |
| ZNF329  | -0.04074 | 3.56E-01 | 4.22E-01 |
| ZNF32   | -0.1322  | 2.65E-03 | 4.97E-03 |
| ZNF330  | -0.12297 | 5.20E-03 | 9.30E-03 |
| ZNF331  | -0.14287 | 1.15E-03 | 2.29E-03 |
| ZNF333  | -0.31417 | 2.92E-13 | 1.82E-12 |
| ZNF334  | -0.16244 | 2.14E-04 | 4.76E-04 |
| ZNF335  | -0.02904 | 5.11E-01 | 5.75E-01 |
| ZNF337  | -0.30251 | 2.33E-12 | 1.32E-11 |
| ZNF33A  | -0.38599 | 9.63E-20 | 1.10E-18 |
| ZNF33B  | -0.44159 | 5.43E-26 | 1.04E-24 |
| ZNF341  | 0.022437 | 6.11E-01 | 6.68E-01 |
| ZNF343  | -0.05149 | 2.43E-01 | 3.03E-01 |
| ZNF345  | -0.26256 | 1.45E-09 | 6.07E-09 |
| ZNF346  | -0.06675 | 1.30E-01 | 1.75E-01 |
| ZNF347  | -0.01337 | 7.62E-01 | 8.02E-01 |
| ZNF34   | -0.30326 | 2.04E-12 | 1.17E-11 |
| ZNF350  | -0.1884  | 1.68E-05 | 4.37E-05 |
| ZNF354A | -0.07561 | 8.65E-02 | 1.21E-01 |
| ZNF354B | -0.24673 | 1.40E-08 | 5.24E-08 |
| ZNF354C | -0.09747 | 2.70E-02 | 4.20E-02 |
| ZNF358  | -0.12638 | 4.07E-03 | 7.42E-03 |
| ZNF35   | 0.071837 | 1.03E-01 | 1.42E-01 |
| ZNF362  | -0.3667  | 7.77E-18 | 7.45E-17 |
| ZNF365  | 0.06481  | 1.42E-01 | 1.88E-01 |
| ZNF366  | -0.28582 | 3.87E-11 | 1.91E-10 |
| ZNF367  | 0.726804 | 9.84E-86 | 1.27E-83 |
| ZNF37A  | -0.14787 | 7.63E-04 | 1.56E-03 |
| ZNF37B  | -0.192   | 1.15E-05 | 3.05E-05 |

|          |          |          |          |
|----------|----------|----------|----------|
| ZNF382   | 0.009967 | 8.21E-01 | 8.53E-01 |
| ZNF383   | 0.027036 | 5.40E-01 | 6.03E-01 |
| ZNF384   | 0.231915 | 1.02E-07 | 3.48E-07 |
| ZNF385A  | 0.119657 | 6.56E-03 | 1.15E-02 |
| ZNF385B  | -0.43172 | 8.52E-25 | 1.48E-23 |
| ZNF385D  | -0.12936 | 3.27E-03 | 6.06E-03 |
| ZNF389   | -0.10133 | 2.15E-02 | 3.41E-02 |
| ZNF391   | -0.07387 | 9.40E-02 | 1.30E-01 |
| ZNF394   | -0.11742 | 7.64E-03 | 1.32E-02 |
| ZNF395   | -0.19606 | 7.39E-06 | 2.01E-05 |
| ZNF396   | -0.3611  | 2.63E-17 | 2.42E-16 |
| ZNF397OS | -0.17193 | 8.80E-05 | 2.06E-04 |
| ZNF397   | -0.27071 | 4.23E-10 | 1.89E-09 |
| ZNF398   | -0.02412 | 5.85E-01 | 6.44E-01 |
| ZNF3     | 0.118305 | 7.19E-03 | 1.25E-02 |
| ZNF404   | -0.09355 | 3.38E-02 | 5.16E-02 |
| ZNF407   | -0.16992 | 1.07E-04 | 2.48E-04 |
| ZNF408   | 0.037059 | 4.01E-01 | 4.68E-01 |
| ZNF410   | 0.249355 | 9.70E-09 | 3.71E-08 |
| ZNF414   | -0.12478 | 4.57E-03 | 8.26E-03 |
| ZNF415   | -0.08916 | 4.31E-02 | 6.44E-02 |
| ZNF416   | -0.01157 | 7.93E-01 | 8.29E-01 |
| ZNF417   | -0.15147 | 5.62E-04 | 1.17E-03 |
| ZNF418   | -0.14598 | 8.92E-04 | 1.81E-03 |
| ZNF419   | -0.10827 | 1.40E-02 | 2.31E-02 |
| ZNF41    | -0.13475 | 2.18E-03 | 4.15E-03 |
| ZNF420   | 0.054388 | 2.18E-01 | 2.75E-01 |
| ZNF423   | -0.30972 | 6.53E-13 | 3.91E-12 |
| ZNF425   | -0.26677 | 7.69E-10 | 3.34E-09 |
| ZNF426   | 0.02839  | 5.20E-01 | 5.84E-01 |
| ZNF428   | -0.01325 | 7.64E-01 | 8.04E-01 |
| ZNF429   | -0.3114  | 4.83E-13 | 2.93E-12 |
| ZNF430   | 0.010454 | 8.13E-01 | 8.45E-01 |
| ZNF431   | -0.11002 | 1.25E-02 | 2.08E-02 |
| ZNF432   | -0.11176 | 1.11E-02 | 1.88E-02 |
| ZNF433   | -0.23129 | 1.11E-07 | 3.77E-07 |
| ZNF434   | -0.28682 | 3.29E-11 | 1.64E-10 |
| ZNF436   | -0.00762 | 8.63E-01 | 8.88E-01 |
| ZNF438   | -0.21038 | 1.46E-06 | 4.33E-06 |
| ZNF439   | -0.17034 | 1.02E-04 | 2.39E-04 |
| ZNF43    | -0.13421 | 2.27E-03 | 4.30E-03 |
| ZNF440   | -0.22051 | 4.32E-07 | 1.37E-06 |
| ZNF441   | -0.40361 | 1.34E-21 | 1.79E-20 |
| ZNF442   | -0.28261 | 6.51E-11 | 3.15E-10 |



|         |          |          |          |
|---------|----------|----------|----------|
| ZNF443  | -0.12023 | 6.30E-03 | 1.11E-02 |
| ZNF444  | -0.34054 | 1.90E-15 | 1.44E-14 |
| ZNF445  | -0.15367 | 4.66E-04 | 9.83E-04 |
| ZNF446  | -0.29783 | 5.21E-12 | 2.84E-11 |
| ZNF449  | -0.14371 | 1.07E-03 | 2.15E-03 |
| ZNF44   | -0.39132 | 2.72E-20 | 3.28E-19 |
| ZNF451  | -0.07275 | 9.91E-02 | 1.37E-01 |
| ZNF454  | -0.21517 | 8.27E-07 | 2.53E-06 |
| ZNF45   | -0.01238 | 7.79E-01 | 8.17E-01 |
| ZNF460  | 0.183801 | 2.71E-05 | 6.83E-05 |
| ZNF461  | 0.037474 | 3.96E-01 | 4.63E-01 |
| ZNF462  | -0.21457 | 8.89E-07 | 2.71E-06 |
| ZNF467  | -0.19515 | 8.17E-06 | 2.21E-05 |
| ZNF468  | 0.12299  | 5.19E-03 | 9.29E-03 |
| ZNF469  | 0.034377 | 4.36E-01 | 5.03E-01 |
| ZNF470  | -0.18251 | 3.09E-05 | 7.73E-05 |
| ZNF471  | -0.24072 | 3.18E-08 | 1.15E-07 |
| ZNF473  | 0.318965 | 1.21E-13 | 7.78E-13 |
| ZNF474  | -0.22925 | 1.44E-07 | 4.84E-07 |
| ZNF479  | 0.114914 | 9.05E-03 | 1.55E-02 |
| ZNF480  | 0.136862 | 1.85E-03 | 3.57E-03 |
| ZNF483  | -0.24984 | 9.07E-09 | 3.48E-08 |
| ZNF484  | -0.196   | 7.44E-06 | 2.03E-05 |
| ZNF485  | 0.066121 | 1.34E-01 | 1.79E-01 |
| ZNF486  | -0.08367 | 5.78E-02 | 8.41E-02 |
| ZNF487  | -0.06624 | 1.33E-01 | 1.78E-01 |
| ZNF488  | 0.337091 | 3.77E-15 | 2.78E-14 |
| ZNF48   | 0.128223 | 3.56E-03 | 6.54E-03 |
| ZNF490  | -0.33268 | 8.95E-15 | 6.38E-14 |
| ZNF491  | -0.37695 | 7.82E-19 | 8.18E-18 |
| ZNF492  | 0.131022 | 2.89E-03 | 5.40E-03 |
| ZNF493  | -0.36071 | 2.86E-17 | 2.63E-16 |
| ZNF496  | 0.01962  | 6.57E-01 | 7.10E-01 |
| ZNF497  | -0.28541 | 4.14E-11 | 2.04E-10 |
| ZNF498  | 0.023059 | 6.02E-01 | 6.59E-01 |
| ZNF500  | -0.39131 | 2.73E-20 | 3.28E-19 |
| ZNF501  | -0.06338 | 1.51E-01 | 1.99E-01 |
| ZNF502  | -0.16022 | 2.62E-04 | 5.74E-04 |
| ZNF503  | -0.16748 | 1.34E-04 | 3.07E-04 |
| ZNF506  | -0.16736 | 1.36E-04 | 3.10E-04 |
| ZNF507  | 0.141961 | 1.24E-03 | 2.45E-03 |
| ZNF510  | -0.16758 | 1.33E-04 | 3.04E-04 |
| ZNF511  | 0.125118 | 4.46E-03 | 8.07E-03 |
| ZNF512B | -0.09648 | 2.86E-02 | 4.43E-02 |

|         |          |          |          |
|---------|----------|----------|----------|
| ZNF512  | -0.15853 | 3.04E-04 | 6.60E-04 |
| ZNF513  | -0.04326 | 3.27E-01 | 3.92E-01 |
| ZNF514  | -0.23349 | 8.32E-08 | 2.86E-07 |
| ZNF516  | -0.22389 | 2.84E-07 | 9.22E-07 |
| ZNF517  | -0.28118 | 8.19E-11 | 3.93E-10 |
| ZNF518A | 0.080489 | 6.80E-02 | 9.77E-02 |
| ZNF518B | 0.126587 | 4.01E-03 | 7.31E-03 |
| ZNF519  | 0.237852 | 4.68E-08 | 1.65E-07 |
| ZNF521  | -0.19026 | 1.38E-05 | 3.62E-05 |
| ZNF524  | -0.13783 | 1.72E-03 | 3.32E-03 |
| ZNF525  | 0.265782 | 8.93E-10 | 3.84E-09 |
| ZNF526  | 0.05184  | 2.40E-01 | 3.00E-01 |
| ZNF527  | -0.00891 | 8.40E-01 | 8.69E-01 |
| ZNF528  | -0.16388 | 1.87E-04 | 4.20E-04 |
| ZNF529  | -0.04711 | 2.86E-01 | 3.48E-01 |
| ZNF530  | 0.249201 | 9.91E-09 | 3.78E-08 |
| ZNF532  | 0.11582  | 8.52E-03 | 1.46E-02 |
| ZNF534  | 0.056816 | 1.98E-01 | 2.53E-01 |
| ZNF536  | -0.38028 | 3.64E-19 | 3.93E-18 |
| ZNF540  | -0.43841 | 1.33E-25 | 2.47E-24 |
| ZNF541  | -0.23338 | 8.44E-08 | 2.90E-07 |
| ZNF542  | 0.013322 | 7.63E-01 | 8.03E-01 |
| ZNF543  | -0.06597 | 1.35E-01 | 1.80E-01 |
| ZNF544  | 0.240644 | 3.22E-08 | 1.16E-07 |
| ZNF546  | -0.34213 | 1.38E-15 | 1.06E-14 |
| ZNF547  | -0.22168 | 3.74E-07 | 1.20E-06 |
| ZNF548  | -0.13713 | 1.81E-03 | 3.50E-03 |
| ZNF549  | -0.12571 | 4.27E-03 | 7.76E-03 |
| ZNF550  | -0.08799 | 4.59E-02 | 6.83E-02 |
| ZNF551  | 0.037289 | 3.98E-01 | 4.65E-01 |
| ZNF552  | -0.36899 | 4.68E-18 | 4.57E-17 |
| ZNF554  | -0.45781 | 4.81E-28 | 1.08E-26 |
| ZNF555  | -0.09876 | 2.50E-02 | 3.93E-02 |
| ZNF556  | 0.065536 | 1.37E-01 | 1.83E-01 |
| ZNF557  | -0.17188 | 8.84E-05 | 2.07E-04 |
| ZNF558  | 0.075849 | 8.55E-02 | 1.20E-01 |
| ZNF559  | -0.21524 | 8.20E-07 | 2.51E-06 |
| ZNF560  | 0.113669 | 9.83E-03 | 1.67E-02 |
| ZNF561  | -0.1378  | 1.72E-03 | 3.33E-03 |
| ZNF562  | 0.111985 | 1.10E-02 | 1.85E-02 |
| ZNF563  | -0.30562 | 1.35E-12 | 7.82E-12 |
| ZNF564  | -0.4241  | 6.73E-24 | 1.09E-22 |
| ZNF565  | -0.0192  | 6.64E-01 | 7.16E-01 |
| ZNF566  | -0.10831 | 1.39E-02 | 2.30E-02 |

|         |          |          |          |
|---------|----------|----------|----------|
| ZNF567  | 0.187339 | 1.88E-05 | 4.85E-05 |
| ZNF568  | -0.04988 | 2.59E-01 | 3.20E-01 |
| ZNF569  | 0.044223 | 3.17E-01 | 3.81E-01 |
| ZNF570  | 0.076716 | 8.20E-02 | 1.15E-01 |
| ZNF571  | -0.1659  | 1.56E-04 | 3.52E-04 |
| ZNF572  | -0.00518 | 9.07E-01 | 9.25E-01 |
| ZNF573  | -0.15732 | 3.39E-04 | 7.30E-04 |
| ZNF574  | -0.00649 | 8.83E-01 | 9.05E-01 |
| ZNF575  | -0.2612  | 1.77E-09 | 7.34E-09 |
| ZNF576  | 0.155578 | 3.95E-04 | 8.42E-04 |
| ZNF577  | -0.27024 | 4.54E-10 | 2.02E-09 |
| ZNF578  | -0.00769 | 8.62E-01 | 8.87E-01 |
| ZNF579  | 0.028568 | 5.18E-01 | 5.82E-01 |
| ZNF57   | -0.21734 | 6.36E-07 | 1.98E-06 |
| ZNF580  | -0.25832 | 2.69E-09 | 1.10E-08 |
| ZNF581  | 0.049687 | 2.60E-01 | 3.22E-01 |
| ZNF582  | -0.15927 | 2.85E-04 | 6.21E-04 |
| ZNF583  | -0.06015 | 1.73E-01 | 2.25E-01 |
| ZNF584  | -0.12721 | 3.83E-03 | 7.01E-03 |
| ZNF585A | 0.145276 | 9.45E-04 | 1.91E-03 |
| ZNF585B | -0.0136  | 7.58E-01 | 7.99E-01 |
| ZNF586  | -0.14335 | 1.11E-03 | 2.21E-03 |
| ZNF587  | -0.10599 | 1.61E-02 | 2.63E-02 |
| ZNF589  | -0.30793 | 8.98E-13 | 5.30E-12 |
| ZNF592  | -0.16248 | 2.13E-04 | 4.74E-04 |
| ZNF593  | 0.060255 | 1.72E-01 | 2.24E-01 |
| ZNF594  | -0.22712 | 1.89E-07 | 6.26E-07 |
| ZNF595  | -0.03682 | 4.04E-01 | 4.71E-01 |
| ZNF596  | -0.3265  | 2.95E-14 | 2.01E-13 |
| ZNF597  | -0.24735 | 1.28E-08 | 4.83E-08 |
| ZNF598  | 0.158676 | 3.00E-04 | 6.53E-04 |
| ZNF599  | -0.14473 | 9.89E-04 | 1.99E-03 |
| ZNF600  | -0.06833 | 1.21E-01 | 1.64E-01 |
| ZNF605  | 0.059053 | 1.81E-01 | 2.33E-01 |
| ZNF606  | -0.0992  | 2.44E-02 | 3.83E-02 |
| ZNF607  | 0.044721 | 3.11E-01 | 3.75E-01 |
| ZNF608  | -0.34255 | 1.26E-15 | 9.76E-15 |
| ZNF609  | -0.14285 | 1.15E-03 | 2.29E-03 |
| ZNF610  | -0.10317 | 1.92E-02 | 3.08E-02 |
| ZNF611  | -0.04747 | 2.82E-01 | 3.44E-01 |
| ZNF613  | -0.11476 | 9.14E-03 | 1.56E-02 |
| ZNF614  | -0.02717 | 5.38E-01 | 6.01E-01 |
| ZNF615  | -0.24693 | 1.36E-08 | 5.10E-08 |
| ZNF616  | -0.0079  | 8.58E-01 | 8.84E-01 |

|        |          |          |          |
|--------|----------|----------|----------|
| ZNF618 | -0.1746  | 6.79E-05 | 1.62E-04 |
| ZNF619 | -0.05881 | 1.83E-01 | 2.35E-01 |
| ZNF620 | -0.00833 | 8.50E-01 | 8.78E-01 |
| ZNF621 | -0.19351 | 9.76E-06 | 2.61E-05 |
| ZNF622 | 0.184936 | 2.41E-05 | 6.13E-05 |
| ZNF623 | 0.112061 | 1.09E-02 | 1.84E-02 |
| ZNF624 | -0.0628  | 1.55E-01 | 2.03E-01 |
| ZNF625 | -0.0846  | 5.50E-02 | 8.05E-02 |
| ZNF626 | -0.16642 | 1.48E-04 | 3.37E-04 |
| ZNF627 | -0.04439 | 3.15E-01 | 3.79E-01 |
| ZNF628 | -0.08384 | 5.73E-02 | 8.34E-02 |
| ZNF629 | -0.2694  | 5.17E-10 | 2.29E-09 |
| ZNF630 | -0.08139 | 6.49E-02 | 9.37E-02 |
| ZNF638 | -0.13198 | 2.69E-03 | 5.05E-03 |
| ZNF639 | 0.396199 | 8.37E-21 | 1.05E-19 |
| ZNF641 | -0.07164 | 1.04E-01 | 1.43E-01 |
| ZNF642 | 0.02896  | 5.12E-01 | 5.76E-01 |
| ZNF643 | 0.289865 | 1.99E-11 | 1.02E-10 |
| ZNF644 | 0.036124 | 4.13E-01 | 4.80E-01 |
| ZNF645 | -0.05584 | 2.06E-01 | 2.61E-01 |
| ZNF646 | -0.14359 | 1.08E-03 | 2.17E-03 |
| ZNF648 | 0.114969 | 9.02E-03 | 1.54E-02 |
| ZNF649 | -0.10002 | 2.32E-02 | 3.67E-02 |
| ZNF652 | -0.2255  | 2.32E-07 | 7.61E-07 |
| ZNF653 | -0.17972 | 4.09E-05 | 1.01E-04 |
| ZNF654 | -0.12943 | 3.26E-03 | 6.03E-03 |
| ZNF655 | -0.10215 | 2.04E-02 | 3.26E-02 |
| ZNF658 | -0.36365 | 1.51E-17 | 1.42E-16 |
| ZNF660 | -0.13072 | 2.96E-03 | 5.51E-03 |
| ZNF662 | -0.33202 | 1.02E-14 | 7.22E-14 |
| ZNF664 | 0.063415 | 1.51E-01 | 1.99E-01 |
| ZNF665 | -0.13277 | 2.54E-03 | 4.77E-03 |
| ZNF667 | 0.001169 | 9.79E-01 | 9.84E-01 |
| ZNF668 | 0.093588 | 3.37E-02 | 5.15E-02 |
| ZNF669 | 0.014225 | 7.47E-01 | 7.90E-01 |
| ZNF670 | 0.146827 | 8.32E-04 | 1.69E-03 |
| ZNF671 | -0.31678 | 1.81E-13 | 1.15E-12 |
| ZNF672 | -0.28983 | 2.00E-11 | 1.02E-10 |
| ZNF673 | -0.09207 | 3.67E-02 | 5.57E-02 |
| ZNF674 | 0.015408 | 7.27E-01 | 7.73E-01 |
| ZNF675 | 0.020014 | 6.50E-01 | 7.04E-01 |
| ZNF676 | 0.048059 | 2.76E-01 | 3.38E-01 |
| ZNF677 | -0.12845 | 3.50E-03 | 6.44E-03 |
| ZNF678 | -0.03708 | 4.01E-01 | 4.68E-01 |

|         |          |          |          |
|---------|----------|----------|----------|
| ZNF679  | 0.157696 | 3.28E-04 | 7.08E-04 |
| ZNF680  | 0.163606 | 1.92E-04 | 4.30E-04 |
| ZNF681  | 0.147697 | 7.74E-04 | 1.58E-03 |
| ZNF682  | -0.25883 | 2.50E-09 | 1.02E-08 |
| ZNF683  | 0.020133 | 6.49E-01 | 7.02E-01 |
| ZNF684  | -0.05644 | 2.01E-01 | 2.56E-01 |
| ZNF687  | -0.08016 | 6.91E-02 | 9.91E-02 |
| ZNF688  | -0.3048  | 1.56E-12 | 9.00E-12 |
| ZNF689  | -0.03239 | 4.63E-01 | 5.29E-01 |
| ZNF691  | -0.2146  | 8.85E-07 | 2.70E-06 |
| ZNF692  | -0.18877 | 1.62E-05 | 4.21E-05 |
| ZNF695  | 0.457231 | 5.72E-28 | 1.27E-26 |
| ZNF696  | -0.11498 | 9.01E-03 | 1.54E-02 |
| ZNF697  | 0.244198 | 1.98E-08 | 7.31E-08 |
| ZNF699  | 0.065607 | 1.37E-01 | 1.83E-01 |
| ZNF69   | -0.42572 | 4.36E-24 | 7.18E-23 |
| ZNF700  | -0.19403 | 9.22E-06 | 2.48E-05 |
| ZNF701  | 0.05988  | 1.75E-01 | 2.27E-01 |
| ZNF702P | -0.01967 | 6.56E-01 | 7.09E-01 |
| ZNF703  | 0.07333  | 9.64E-02 | 1.33E-01 |
| ZNF704  | -0.29899 | 4.28E-12 | 2.35E-11 |
| ZNF705A | 0.037079 | 4.01E-01 | 4.68E-01 |
| ZNF705D | 0.074671 | 9.05E-02 | 1.26E-01 |
| ZNF706  | 0.207116 | 2.13E-06 | 6.21E-06 |
| ZNF707  | -0.14649 | 8.55E-04 | 1.74E-03 |
| ZNF708  | -0.16923 | 1.14E-04 | 2.63E-04 |
| ZNF709  | -0.30637 | 1.18E-12 | 6.89E-12 |
| ZNF70   | -0.16034 | 2.59E-04 | 5.68E-04 |
| ZNF710  | -0.17874 | 4.52E-05 | 1.11E-04 |
| ZNF711  | 0.029225 | 5.08E-01 | 5.72E-01 |
| ZNF713  | -0.00289 | 9.48E-01 | 9.59E-01 |
| ZNF714  | 0.045341 | 3.04E-01 | 3.68E-01 |
| ZNF716  | 0.118327 | 7.18E-03 | 1.25E-02 |
| ZNF717  | -0.05481 | 2.14E-01 | 2.71E-01 |
| ZNF718  | 0.20513  | 2.68E-06 | 7.72E-06 |
| ZNF71   | 0.134503 | 2.22E-03 | 4.22E-03 |
| ZNF720  | -0.28075 | 8.77E-11 | 4.19E-10 |
| ZNF721  | -0.13513 | 2.12E-03 | 4.03E-03 |
| ZNF727  | -0.08061 | 6.76E-02 | 9.71E-02 |
| ZNF732  | 0.056151 | 2.03E-01 | 2.59E-01 |
| ZNF735  | 0.065814 | 1.36E-01 | 1.81E-01 |
| ZNF737  | -0.22609 | 2.15E-07 | 7.10E-07 |
| ZNF738  | 0.046596 | 2.91E-01 | 3.54E-01 |
| ZNF740  | -0.06058 | 1.70E-01 | 2.21E-01 |

|         |          |          |          |
|---------|----------|----------|----------|
| ZNF746  | 0.133018 | 2.49E-03 | 4.69E-03 |
| ZNF747  | -0.13163 | 2.76E-03 | 5.17E-03 |
| ZNF749  | 0.092246 | 3.64E-02 | 5.52E-02 |
| ZNF74   | -0.02635 | 5.51E-01 | 6.12E-01 |
| ZNF750  | -0.39694 | 6.99E-21 | 8.79E-20 |
| ZNF75A  | -0.00438 | 9.21E-01 | 9.37E-01 |
| ZNF75D  | -0.42129 | 1.42E-23 | 2.25E-22 |
| ZNF761  | 0.139328 | 1.53E-03 | 2.98E-03 |
| ZNF763  | -0.53075 | 9.19E-39 | 3.97E-37 |
| ZNF764  | -0.19255 | 1.08E-05 | 2.88E-05 |
| ZNF765  | 0.265502 | 9.31E-10 | 4.00E-09 |
| ZNF766  | -0.10007 | 2.31E-02 | 3.66E-02 |
| ZNF767  | -0.24473 | 1.84E-08 | 6.81E-08 |
| ZNF768  | 0.048248 | 2.74E-01 | 3.36E-01 |
| ZNF76   | -0.24933 | 9.74E-09 | 3.72E-08 |
| ZNF770  | 0.110964 | 1.17E-02 | 1.97E-02 |
| ZNF771  | 0.078087 | 7.66E-02 | 1.09E-01 |
| ZNF772  | -0.00266 | 9.52E-01 | 9.62E-01 |
| ZNF773  | -0.11187 | 1.11E-02 | 1.87E-02 |
| ZNF774  | -0.17586 | 6.01E-05 | 1.45E-04 |
| ZNF775  | 0.075359 | 8.76E-02 | 1.22E-01 |
| ZNF776  | -0.23416 | 7.62E-08 | 2.63E-07 |
| ZNF777  | -0.00611 | 8.90E-01 | 9.11E-01 |
| ZNF778  | -0.40221 | 1.90E-21 | 2.51E-20 |
| ZNF77   | -0.07343 | 9.60E-02 | 1.33E-01 |
| ZNF780A | -0.15261 | 5.10E-04 | 1.07E-03 |
| ZNF780B | -0.17777 | 4.98E-05 | 1.21E-04 |
| ZNF781  | -0.1737  | 7.42E-05 | 1.76E-04 |
| ZNF782  | -0.24069 | 3.20E-08 | 1.15E-07 |
| ZNF784  | -0.28221 | 6.95E-11 | 3.35E-10 |
| ZNF785  | -0.22602 | 2.17E-07 | 7.15E-07 |
| ZNF786  | 0.000846 | 9.85E-01 | 9.88E-01 |
| ZNF787  | 0.070459 | 1.10E-01 | 1.50E-01 |
| ZNF788  | -0.01873 | 6.72E-01 | 7.23E-01 |
| ZNF789  | -0.05665 | 1.99E-01 | 2.54E-01 |
| ZNF790  | -0.16466 | 1.75E-04 | 3.93E-04 |
| ZNF791  | -0.14806 | 7.51E-04 | 1.54E-03 |
| ZNF792  | -0.10754 | 1.46E-02 | 2.41E-02 |
| ZNF793  | 0.007824 | 8.59E-01 | 8.85E-01 |
| ZNF799  | -0.14566 | 9.16E-04 | 1.85E-03 |
| ZNF79   | -0.1561  | 3.77E-04 | 8.07E-04 |
| ZNF7    | -0.03831 | 3.86E-01 | 4.52E-01 |
| ZNF800  | 0.071697 | 1.04E-01 | 1.43E-01 |
| ZNF804A | 0.031394 | 4.77E-01 | 5.42E-01 |

|         |          |          |          |
|---------|----------|----------|----------|
| ZNF804B | 0.077124 | 8.04E-02 | 1.13E-01 |
| ZNF805  | -0.1291  | 3.34E-03 | 6.16E-03 |
| ZNF808  | -0.16946 | 1.11E-04 | 2.58E-04 |
| ZNF80   | -0.02025 | 6.47E-01 | 7.01E-01 |
| ZNF813  | 0.245285 | 1.71E-08 | 6.34E-08 |
| ZNF814  | -0.27593 | 1.88E-10 | 8.73E-10 |
| ZNF815  | -0.16742 | 1.35E-04 | 3.09E-04 |
| ZNF816A | -0.18431 | 2.57E-05 | 6.50E-05 |
| ZNF81   | 0.041736 | 3.45E-01 | 4.10E-01 |
| ZNF821  | -0.12953 | 3.23E-03 | 5.99E-03 |
| ZNF823  | -0.11841 | 7.14E-03 | 1.24E-02 |
| ZNF826  | -0.04273 | 3.33E-01 | 3.99E-01 |
| ZNF827  | -0.00381 | 9.31E-01 | 9.45E-01 |
| ZNF828  | 0.036406 | 4.10E-01 | 4.76E-01 |
| ZNF829  | 0.123222 | 5.11E-03 | 9.15E-03 |
| ZNF830  | 0.002894 | 9.48E-01 | 9.59E-01 |
| ZNF831  | -0.1944  | 8.85E-06 | 2.39E-05 |
| ZNF833  | 0.126513 | 4.03E-03 | 7.35E-03 |
| ZNF835  | -0.21902 | 5.18E-07 | 1.63E-06 |
| ZNF836  | -0.28187 | 7.34E-11 | 3.53E-10 |
| ZNF837  | -0.20861 | 1.80E-06 | 5.28E-06 |
| ZNF839  | -0.19642 | 7.11E-06 | 1.94E-05 |
| ZNF83   | -0.23363 | 8.16E-08 | 2.81E-07 |
| ZNF841  | -0.08785 | 4.63E-02 | 6.88E-02 |
| ZNF843  | -0.16231 | 2.16E-04 | 4.81E-04 |
| ZNF844  | -0.24133 | 2.93E-08 | 1.06E-07 |
| ZNF845  | 0.180185 | 3.91E-05 | 9.64E-05 |
| ZNF846  | -0.38885 | 4.91E-20 | 5.74E-19 |
| ZNF84   | -0.01266 | 7.74E-01 | 8.12E-01 |
| ZNF853  | -0.06126 | 1.65E-01 | 2.15E-01 |
| ZNF85   | 0.030558 | 4.89E-01 | 5.54E-01 |
| ZNF860  | 0.099958 | 2.33E-02 | 3.68E-02 |
| ZNF862  | -0.30986 | 6.36E-13 | 3.82E-12 |
| ZNF876P | 0.150001 | 6.38E-04 | 1.32E-03 |
| ZNF878  | 0.099412 | 2.41E-02 | 3.79E-02 |
| ZNF879  | -0.17567 | 6.12E-05 | 1.47E-04 |
| ZNF880  | -0.05243 | 2.35E-01 | 2.94E-01 |
| ZNF883  | 0.238834 | 4.10E-08 | 1.46E-07 |
| ZNF8    | 0.175939 | 5.96E-05 | 1.44E-04 |
| ZNF90   | -0.01539 | 7.28E-01 | 7.73E-01 |
| ZNF91   | -0.22331 | 3.05E-07 | 9.88E-07 |
| ZNF92   | 0.316883 | 1.78E-13 | 1.13E-12 |
| ZNF93   | 0.271717 | 3.62E-10 | 1.63E-09 |
| ZNF98   | 0.143836 | 1.06E-03 | 2.13E-03 |

|           |          |          |          |
|-----------|----------|----------|----------|
| ZNF99     | 0.016078 | 7.16E-01 | 7.63E-01 |
| ZNFX1     | -0.03301 | 4.55E-01 | 5.21E-01 |
| ZNHIT1    | 0.075775 | 8.58E-02 | 1.20E-01 |
| ZNHIT2    | -0.16962 | 1.10E-04 | 2.55E-04 |
| ZNHIT3    | 0.299606 | 3.85E-12 | 2.13E-11 |
| ZNHIT6    | 0.144584 | 1.00E-03 | 2.01E-03 |
| ZNRD1     | 0.151922 | 5.41E-04 | 1.13E-03 |
| ZNRF1     | 0.003566 | 9.36E-01 | 9.49E-01 |
| ZNRF2     | 0.140417 | 1.40E-03 | 2.75E-03 |
| ZNRF3     | -0.29645 | 6.60E-12 | 3.55E-11 |
| ZNRF4     | 0.07814  | 7.64E-02 | 1.09E-01 |
| ZP1       | 0.149068 | 6.90E-04 | 1.42E-03 |
| ZP2       | -0.1681  | 1.27E-04 | 2.91E-04 |
| ZP3       | 0.315057 | 2.49E-13 | 1.55E-12 |
| ZP4       | 0.08612  | 5.08E-02 | 7.48E-02 |
| ZPBP2     | 0.048859 | 2.68E-01 | 3.30E-01 |
| ZPBP      | -0.14564 | 9.17E-04 | 1.85E-03 |
| ZPLD1     | 0.113843 | 9.72E-03 | 1.65E-02 |
| ZRANB1    | -0.13461 | 2.20E-03 | 4.19E-03 |
| ZRANB2    | -0.07977 | 7.05E-02 | 1.01E-01 |
| ZRANB3    | 0.361185 | 2.58E-17 | 2.38E-16 |
| ZRSR2     | -0.31281 | 3.74E-13 | 2.29E-12 |
| ZSCAN10   | 0.044403 | 3.15E-01 | 3.79E-01 |
| ZSCAN12P1 | 0.094217 | 3.25E-02 | 4.99E-02 |
| ZSCAN12   | -0.06958 | 1.15E-01 | 1.56E-01 |
| ZSCAN16   | -0.07861 | 7.47E-02 | 1.06E-01 |
| ZSCAN18   | -0.20356 | 3.20E-06 | 9.15E-06 |
| ZSCAN1    | -0.09262 | 3.56E-02 | 5.42E-02 |
| ZSCAN20   | 0.10464  | 1.75E-02 | 2.84E-02 |
| ZSCAN21   | 0.233342 | 8.48E-08 | 2.92E-07 |
| ZSCAN22   | -0.14881 | 7.05E-04 | 1.45E-03 |
| ZSCAN23   | -0.08474 | 5.46E-02 | 7.99E-02 |
| ZSCAN29   | -0.02695 | 5.42E-01 | 6.04E-01 |
| ZSCAN2    | -0.0556  | 2.08E-01 | 2.64E-01 |
| ZSCAN4    | -0.38588 | 9.88E-20 | 1.13E-18 |
| ZSCAN5A   | 0.035662 | 4.19E-01 | 4.86E-01 |
| ZSCAN5B   | 0.044871 | 3.09E-01 | 3.74E-01 |
| ZSWIM1    | 0.019699 | 6.56E-01 | 7.09E-01 |
| ZSWIM2    | 0.043805 | 3.21E-01 | 3.86E-01 |
| ZSWIM3    | 0.035827 | 4.17E-01 | 4.84E-01 |
| ZSWIM4    | -0.08011 | 6.93E-02 | 9.93E-02 |
| ZSWIM5    | -0.24519 | 1.73E-08 | 6.42E-08 |
| ZSWIM6    | -0.07664 | 8.23E-02 | 1.16E-01 |
| ZSWIM7    | -0.37581 | 1.01E-18 | 1.05E-17 |



|           |          |           |           |
|-----------|----------|-----------|-----------|
| ZUFSP     | 0.396938 | 6.99E-21  | 8.79E-20  |
| ZW10      | 0.313678 | 3.20E-13  | 1.98E-12  |
| ZWILCH    | 0.70665  | 4.23E-79  | 5.12E-77  |
| ZWINT     | 0.840954 | 6.24E-139 | 2.31E-136 |
| ZXDA      | -0.20276 | 3.51E-06  | 9.97E-06  |
| ZXDB      | -0.04364 | 3.23E-01  | 3.88E-01  |
| ZXDC      | -0.3163  | 1.98E-13  | 1.25E-12  |
| ZYG11A    | 0.36114  | 2.61E-17  | 2.40E-16  |
| ZYG11B    | -0.16444 | 1.78E-04  | 4.00E-04  |
| ZYX       | 0.078794 | 7.40E-02  | 1.05E-01  |
| ZZEF1     | -0.27118 | 3.93E-10  | 1.76E-09  |
| ZZZ3      | 0.2385   | 4.29E-08  | 1.52E-07  |
| psiTPTE22 | -0.16955 | 1.10E-04  | 2.56E-04  |
| tAKR      | -0.0285  | 5.19E-01  | 5.83E-01  |

---

FDR (BH): FDR is calculated by BH (Benjamini-Hochberg method); FDR: False discovery rate.

**Table S2. Gene Ontology term annotation of *RRM2* co-expressed genes.**

| Gene set   | Description                                 | Size | Leading edge number | ES       | NES     | P-value  | FDR      |
|------------|---------------------------------------------|------|---------------------|----------|---------|----------|----------|
| GO:0048285 | organelle fission                           | 404  | 101                 | 0.86358  | 2.5404  | 0        | 0        |
| GO:0044772 | mitotic cell cycle phase transition         | 453  | 146                 | 0.81304  | 2.3638  | 0        | 0        |
| GO:0006310 | DNA recombination                           | 233  | 72                  | 0.80766  | 2.2595  | 0        | 0        |
| GO:0045930 | negative regulation of mitotic cell cycle   | 237  | 53                  | 0.78256  | 2.181   | 0        | 0        |
| GO:0051052 | regulation of DNA metabolic process         | 367  | 96                  | 0.74623  | 2.1713  | 0        | 0        |
| GO:0006333 | chromatin assembly or disassembly           | 139  | 43                  | 0.80094  | 2.1389  | 0        | 0        |
| GO:0034394 | protein localization to cell surface        | 56   | 14                  | -0.67878 | -1.9092 | 0        | 0.00809  |
| GO:0032409 | regulation of transporter activity          | 231  | 77                  | -0.53302 | -1.8228 | 0        | 0.015371 |
| GO:0007588 | excretion                                   | 65   | 23                  | -0.59631 | -1.7008 | 0        | 0.039583 |
| GO:0001539 | cilium or flagellum-dependent cell motility | 25   | 18                  | -0.71444 | -1.7026 | 0.002299 | 0.044495 |
| GO:0097503 | sialylation                                 | 20   | 10                  | -0.71639 | -1.6629 | 0.008909 | 0.056154 |
| GO:1903034 | regulation of response to wounding          | 145  | 38                  | -0.5074  | -1.633  | 0        | 0.056318 |
| GO:0003007 | heart morphogenesis                         | 244  | 62                  | -0.47603 | -1.6391 | 0        | 0.058476 |
| GO:0046717 | acid secretion                              | 107  | 22                  | -0.53499 | -1.6363 | 0        | 0.05882  |

ES: Enrichment score; NES: Normalized enrichment score; FDR: false discovery rate.

**Table S3. KEGG annotation of *RRM2* co-expressed genes.**

| Gene set | Description                                  | Size | Leading edge number | ES       | NES     | P-value  | FDR      |
|----------|----------------------------------------------|------|---------------------|----------|---------|----------|----------|
| hsa03460 | Fanconi anemia pathway                       | 44   | 18                  | 0.87513  | 2.0316  | 0        | 0        |
| hsa03013 | RNA transport                                | 158  | 65                  | 0.72762  | 1.9883  | 0        | 0        |
| hsa04114 | Oocyte meiosis                               | 118  | 24                  | 0.74222  | 1.9576  | 0        | 0        |
| hsa03040 | Spliceosome                                  | 115  | 62                  | 0.73022  | 1.9153  | 0        | 0        |
| hsa03008 | Ribosome biogenesis in eukaryotes            | 70   | 39                  | 0.77639  | 1.9144  | 0        | 0        |
| hsa04218 | Cellular senescence                          | 155  | 27                  | 0.70545  | 1.9087  | 0        | 0        |
| hsa03420 | Nucleotide excision repair                   | 45   | 17                  | 0.74844  | 1.7281  | 0.001623 | 0.005809 |
| hsa05150 | Staphylococcus aureus infection              | 52   | 21                  | -0.62811 | -1.7224 | 0.005602 | 0.010716 |
| hsa03320 | PPAR signaling pathway                       | 74   | 20                  | -0.59211 | -1.7246 | 0        | 0.011535 |
| hsa05169 | Epstein-Barr virus infection                 | 195  | 41                  | 0.60869  | 1.6843  | 0        | 0.012572 |
| hsa00980 | Metabolism of xenobiotics by cytochrome P450 | 70   | 23                  | -0.58242 | -1.7275 | 0        | 0.013874 |
| hsa00591 | Linoleic acid metabolism                     | 27   | 12                  | -0.68288 | -1.658  | 0.00978  | 0.019388 |
| hsa04142 | Lysosome                                     | 121  | 37                  | -0.53627 | -1.6507 | 0.003937 | 0.019535 |
| hsa03010 | Ribosome                                     | 131  | 38                  | 0.61688  | 1.6429  | 0.001326 | 0.020533 |
| hsa00670 | One carbon pool by folate                    | 18   | 8                   | 0.79898  | 1.638   | 0.003677 | 0.02141  |
| hsa00340 | Histidine metabolism                         | 21   | 9                   | -0.71719 | -1.6607 | 0.004474 | 0.021768 |
| hsa04710 | Circadian rhythm                             | 30   | 9                   | -0.6768  | -1.6661 | 0.009662 | 0.022725 |
| hsa05217 | Basal cell carcinoma                         | 63   | 26                  | -0.58395 | -1.6733 | 0.005814 | 0.023024 |
| hsa04925 | Aldosterone synthesis and secretion          | 96   | 30                  | -0.53531 | -1.6213 | 0        | 0.02707  |
| hsa04120 | Ubiquitin mediated proteolysis               | 133  | 28                  | 0.6067   | 1.6121  | 0.002699 | 0.029915 |
| hsa00970 | Aminoacyl-tRNA biosynthesis                  | 43   | 19                  | 0.70604  | 1.6072  | 0.010399 | 0.030213 |

KEGG: Kyoto Encyclopedia of Genes and Genomes; ES: Enrichment score; NES: Normalized enrichment score; FDR: false discovery rate.

**Table S4. Kinases enrichment of *RRM2* co-expressed genes.**

| Gene Set        | Description                 | Size | Leading Edge Number | ES     | NES   | P-value | FDR    |
|-----------------|-----------------------------|------|---------------------|--------|-------|---------|--------|
| Kinase_CDK1     | cyclin dependent kinase 1   | 25   |                     | 0.8348 | 2.382 |         |        |
|                 |                             | 8    | 67                  | 3      | 9     | 0       | 0      |
|                 |                             |      |                     |        | 2.237 |         |        |
| Kinase_PLK1     | polo like kinase 1          | 90   | 31                  | 0.8895 | 4     | 0       | 0      |
|                 |                             | 27   |                     | 0.7814 | 2.228 |         |        |
| Kinase_CDK2     | cyclin dependent kinase 2   | 8    | 84                  | 9      | 1     | 0       | 0      |
| Kinase_AURK B   | aurora kinase B             | 87   | 31                  | 5      | 3     | 0       | 0      |
|                 |                             | 12   |                     |        | 2.101 |         |        |
| Kinase_ATM      | ATM serine/threonine kinase | 3    | 38                  | 0.7934 | 1     | 0       | 0      |
| Kinase_CHEK 1   | checkpoint kinase 1         | 13   |                     | 0.7809 | 2.096 |         |        |
|                 |                             | 0    | 28                  | 3      | 4     | 0       | 0      |
|                 |                             |      |                     | 0.8321 | 2.046 |         |        |
| Kinase_ATR      | ATR serine/threonine kinase | 66   | 20                  | 2      | 5     | 0       | 0      |
| Kinase_AURK A   | aurora kinase A             | 46   | 12                  | 6      | 3     | 0       | 0      |
|                 |                             | 25   |                     |        | 1.927 |         |        |
| Kinase_CSNK 2A1 | casein kinase 2 alpha 1     | 6    | 65                  | 0.6806 | 5     | 0       | 0      |
| Kinase_CHEK 2   | checkpoint kinase 2         | 27   | 10                  | 8      | 4     | 0       | 22     |
|                 |                             |      |                     | 0.8858 | 1.898 |         | 0.0001 |
|                 |                             |      |                     | 0.8862 | 1.791 | 0.0018  | 0.0015 |
| Kinase_PLK3     | polo like kinase 3          | 20   | 8                   | 7      | 5     | 45      | 55     |

|                    |                                                  |    |    |        |       |    |        |        |       |        |        |
|--------------------|--------------------------------------------------|----|----|--------|-------|----|--------|--------|-------|--------|--------|
| Kinase_TTK         | TTK protein kinase                               | 12 | 6  | 7      | 1     | 98 | 02     | 0.8972 | 1.736 | 0.0018 | 0.0058 |
|                    |                                                  |    |    |        |       |    |        | 0.7287 | 1.713 | 0.0014 | 0.0093 |
| Kinase_PAK1        | p21 (RAC1) activated kinase 1                    | 50 | 11 | 8      | 6     | 95 | 95     | 0.8424 |       | 0.0019 | 0.0157 |
| Kinase_CDK7        | cyclin dependent kinase 7                        | 18 | 6  | 3      | 1.688 | 01 | 04     | 0.8371 | 1.665 | 0.0037 | 0.0241 |
| Kinase_MAP3<br>K8  | mitogen-activated protein kinase kinase kinase 8 | 19 | 4  | 3      | 7     | 18 | 02     | 0.7192 |       | 0.0045 | 0.0277 |
| Kinase_RPS6K<br>A1 | ribosomal protein S6 kinase A1                   | 46 | 13 | 7      | 1.657 | 52 | 87     | 0.7433 | 1.640 | 0.0033 | 0.0370 |
| Kinase_RPS6K<br>A3 | ribosomal protein S6 kinase A3                   | 38 | 7  | 3      | 8     | 84 | 01     |        |       |        | 0.0707 |
| Kinase_MAPK<br>1   | mitogen-activated protein kinase 1               | 7  | 22 | 0.5765 | 1.599 | 0  | 05     | 0.9084 | 1.545 | 0.0233 | 0.1038 |
| Kinase_FGFR1       | fibroblast growth factor receptor 1              | 7  | 2  | 8      | 5     | 92 | 6      | 0.9562 | 1.571 | 0.0084 | 0.1040 |
| Kinase_BUB1        | BUB1 mitotic checkpoint serine/threonine kinase  | 5  | 3  | 8      | 9     | 57 | 8      | 0.8983 | 1.545 | 0.0209 | 0.1076 |
| Kinase_RPS6K<br>A6 | ribosomal protein S6 kinase A6                   | 7  | 3  | 6      | 7     | 21 | 6      | 0.9618 |       | 0.0057 | 0.1093 |
| Kinase_WEE1        | WEE1 G2 checkpoint kinase                        | 5  | 4  | 8      | 1.553 | 58 | 2      | 0.9165 | 1.565 | 0.0303 | 0.1097 |
| Kinase_STK3        | serine/threonine kinase 3                        | 7  | 1  | 7      | 3     | 03 | 4      |        |       |        |        |
| Kinase_FYN         | FYN proto-oncogene, Src family tyrosine kinase   | 66 | 20 | 0.3989 | 1.162 | 1  | 0.7105 | -      | -     | 0.1959 |        |

|                   |                                                      |    |    |   |        |        |        |        |
|-------------------|------------------------------------------------------|----|----|---|--------|--------|--------|--------|
|                   |                                                      |    |    |   | -      | -      |        |        |
|                   |                                                      |    |    |   | 0.4935 | 1.164  | 0.2391 | 0.7251 |
| Kinase_HCK        | HCK proto-oncogene, Src family tyrosine kinase       | 23 | 12 | 3 | 2      | 8      | 7      |        |
|                   |                                                      |    |    |   | -      | -      |        |        |
|                   |                                                      |    |    |   | 0.6038 | 1.149  | 0.3052 | 0.7272 |
| Kinase_BTK        | Bruton tyrosine kinase                               | 9  | 5  | 7 | 4      | 8      | 8      |        |
|                   |                                                      |    |    |   | -      | -      |        |        |
|                   |                                                      |    |    |   | 0.5940 | 1.167  |        | 0.7364 |
| Kinase_NTRK2      | neurotrophic receptor tyrosine kinase 2              | 11 | 5  | 5 | 7      | 0.2963 | 3      |        |
|                   |                                                      |    |    |   | -      | -      |        |        |
|                   |                                                      |    |    |   | 0.4825 | 1.173  | 0.2291 | 0.7409 |
| Kinase_MAPK<br>7  | mitogen-activated protein kinase 7                   | 30 | 11 | 3 | 3      | 2      | 6      |        |
|                   |                                                      |    |    |   | -      | -      |        |        |
|                   |                                                      |    |    |   | 0.6376 | 1.174  | 0.2723 | 0.7615 |
| Kinase_PDGF<br>RA | platelet derived growth factor receptor alpha        | 8  | 3  | 7 | 5      | 7      | 6      |        |
|                   |                                                      |    |    |   | -      | -      |        |        |
|                   |                                                      |    |    |   | 0.3752 | 1.119  | 0.2408 | 0.7727 |
| Kinase_PRKA<br>CB | protein kinase cAMP-activated catalytic subunit beta | 85 | 18 | 6 | 4      | 8      | 6      |        |
|                   |                                                      |    |    |   | -      | -      |        |        |
|                   |                                                      |    |    |   | 0.7611 | 1.125  | 0.3532 | 0.7763 |
| Kinase_CDK16      | cyclin dependent kinase 16                           | 3  | 1  | 6 | 7      | 7      | 1      |        |
|                   |                                                      |    |    |   | -      | -      |        |        |
|                   |                                                      |    |    |   | 0.8286 | 1.424  | 0.0411 | 0.7776 |
| Kinase_TGFB<br>R2 | transforming growth factor beta receptor 2           | 6  | 2  | 2 | 5      | 99     | 1      |        |

|                    |                                                                  |    |    |                  |                 |             |             |
|--------------------|------------------------------------------------------------------|----|----|------------------|-----------------|-------------|-------------|
| Kinase_CSNK<br>1G3 | casein kinase 1 gamma 3                                          | 4  | 2  | -<br>0.7500<br>4 | -<br>1.175<br>5 | 0.2898<br>8 | 0.7842<br>9 |
| Kinase_ARAF        | A-Raf proto-oncogene, serine/threonine kinase                    | 13 | 2  | -<br>0.5258<br>5 | -<br>1.093<br>2 | 0.3760<br>3 | 0.7872<br>7 |
| Kinase_TRPM<br>7   | transient receptor potential cation channel subfamily M member 7 | 5  | 1  | -<br>0.7018<br>5 | -<br>1.182<br>8 | 0.2960<br>8 | 0.7902<br>5 |
| Kinase_PRKA<br>CG  | protein kinase cAMP-activated catalytic subunit gamma            | 84 | 17 | -<br>0.3671<br>3 | -<br>1.095<br>9 | 0.2888<br>1 | 0.7999<br>5 |
| Kinase_DYRK<br>1A  | dual specificity tyrosine phosphorylation regulated kinase 1A    | 14 | 6  | -<br>0.5628<br>3 | -<br>1.185<br>1 | 0.2557<br>2 | 0.8080<br>8 |
| Kinase_NLK         | nemo like kinase                                                 | 10 | 5  | -<br>0.5614<br>7 | -<br>1.071<br>1 | 0.3808<br>6 | 0.8093<br>8 |
| Kinase_PDPK1       | 3-phosphoinositide dependent protein kinase 1                    | 21 | 4  | -<br>0.4742<br>1 | -<br>1.097<br>6 | 0.3136      | 0.8163<br>2 |
| Kinase_MAPK<br>10  | mitogen-activated protein kinase 10                              | 25 | 10 | -<br>0.4304<br>1 | -<br>1.039<br>9 | 0.3871<br>7 | 0.8177      |

|                   |                                                                           |    |    |   |        |       |        |        |
|-------------------|---------------------------------------------------------------------------|----|----|---|--------|-------|--------|--------|
|                   |                                                                           |    |    |   | -      |       |        |        |
| Kinase_PTK2B      | protein tyrosine kinase 2 beta                                            | 6  | 3  | 9 | 0.6202 | 1.072 | 0.4271 | 0.8265 |
|                   |                                                                           |    |    |   | -      |       |        |        |
| Kinase_FER        | FER tyrosine kinase                                                       | 8  | 3  | 4 | 0.5641 | 1.041 | 0.4353 | 0.8316 |
|                   |                                                                           |    |    |   | -      |       |        |        |
| Kinase_RET        | ret proto-oncogene                                                        | 16 | 2  | 8 | 0.4773 | 1.048 | 0.4135 | 0.8319 |
|                   |                                                                           |    |    |   | -      |       |        |        |
| Kinase_SYK        | spleen associated tyrosine kinase                                         | 35 | 12 | 1 | 0.4706 | 1.185 | 0.2177 | 0.8382 |
|                   |                                                                           |    |    |   | -      |       |        |        |
| Kinase_PIK3C<br>A | phosphatidylinositol-4,5-bisphosphate 3-kinase catalytic<br>subunit alpha | 10 | 2  | 6 | 0.5446 | 1.048 | 0.4174 | 0.8512 |

ES: Enrichment score; NES: Normalized enrichment score; FDR: false discovery rate.



**Table S5. miRNA enrichment of *RRM2* co-expressed genes.**

| Gene Set                           | Size | Leading Edge Number | ES       | NES     | P Value  | FDR     |
|------------------------------------|------|---------------------|----------|---------|----------|---------|
| AGCGCTT,MIR-518F,MIR-518E,MIR-518A | 16   | 5                   | -0.64667 | -1.4072 | 0.078351 | 0.48209 |
| CCCAGAG,MIR-326                    | 141  | 30                  | -0.4352  | -1.4088 | 0.009009 | 0.55154 |
| AGGGCAG,MIR-18A                    | 130  | 34                  | -0.45477 | -1.4499 | 0        | 0.55987 |
| GAGCTGG,MIR-337                    | 147  | 34                  | -0.38668 | -1.2417 | 0.060086 | 0.61109 |
| ACACTGG,MIR-199A,MIR-199B          | 146  | 36                  | -0.40024 | -1.3139 | 0.021552 | 0.61239 |
| GGGGCCC,MIR-296                    | 67   | 13                  | -0.44139 | -1.2734 | 0.075075 | 0.61662 |
| GTCAGGA,MIR-378                    | 53   | 8                   | -0.45731 | -1.2484 | 0.12857  | 0.61763 |
| ACGCACA,MIR-210                    | 7    | 4                   | -0.67927 | -1.2329 | 0.23183  | 0.61779 |
| AAGCAAT,MIR-137                    | 201  | 45                  | -0.38484 | -1.3022 | 0.016949 | 0.61865 |
| GACAGGG,MIR-339                    | 61   | 16                  | -0.44782 | -1.2816 | 0.089172 | 0.61899 |
| ATGCTGG,MIR-338                    | 104  | 22                  | -0.42112 | -1.2894 | 0.059289 | 0.62791 |
| GTGCCAA,MIR-96                     | 284  | 74                  | -0.40314 | -1.4143 | 0        | 0.63097 |
| GTGCAAA,MIR-507                    | 119  | 43                  | -0.40634 | -1.2611 | 0.069959 | 0.63164 |
| GCAAGAC,MIR-431                    | 43   | 7                   | -0.46626 | -1.2494 | 0.1383   | 0.64669 |
| AGCATTA,MIR-155                    | 128  | 30                  | -0.33893 | -1.0667 | 0.29555  | 0.6531  |
| GGTAACC,MIR-409-5P                 | 27   | 9                   | -0.447   | -1.0724 | 0.35452  | 0.65778 |
| GACAATC,MIR-219                    | 134  | 48                  | -0.40935 | -1.3154 | 0.020325 | 0.6603  |
| AAAGACA,MIR-511                    | 182  | 41                  | -0.32242 | -1.0745 | 0.19681  | 0.66363 |
| CCACACA,MIR-147                    | 57   | 18                  | -0.42708 | -1.1825 | 0.17417  | 0.66442 |
| AGCGCAG,MIR-191                    | 12   | 9                   | -0.53645 | -1.0667 | 0.38528  | 0.66556 |
| AACTGGA,MIR-145                    | 215  | 69                  | -0.34285 | -1.1758 | 0.059406 | 0.66748 |
| CTCTATG,MIR-368                    | 37   | 10                  | -0.4189  | -1.0756 | 0.34663  | 0.67332 |
| CCTGTGA,MIR-513                    | 118  | 36                  | -0.46144 | -1.4589 | 0.01476  | 0.67989 |
| CTCTAGA,MIR-526C,MIR-518F,MIR-526A | 51   | 8                   | 0.2651   | 0.62844 | 0.9611   | 0.99051 |
| GTAAGAT,MIR-200A                   | 45   | 10                  | 0.27813  | 0.64602 | 0.94219  | 0.99379 |
| CGCAAAA,MIR-450                    | 8    | 3                   | 0.29637  | 0.52927 | 0.96473  | 0.99638 |
| TACAATC,MIR-508                    | 58   | 17                  | 0.27956  | 0.66088 | 0.96094  | 0.99672 |
| TACTTGA,MIR-26A,MIR-26B            | 285  | 43                  | 0.46441  | 1.3222  | 0.027907 | 1       |
| GA CTGTT,MIR-212,MIR-132           | 148  | 27                  | 0.48862  | 1.3026  | 0.058154 | 1       |
| GTGGTGA,MIR-197                    | 67   | 17                  | 0.53601  | 1.3237  | 0.089686 | 1       |
| CAGGTCC,MIR-492                    | 59   | 12                  | 0.49068  | 1.1819  | 0.22755  | 1       |

|                 |     |    |         |        |         |   |
|-----------------|-----|----|---------|--------|---------|---|
| AGTCTTA,MIR-499 | 68  | 20 | 0.47601 | 1.1772 | 0.24554 | 1 |
| ATAACCT,MIR-154 | 60  | 10 | 0.48592 | 1.1577 | 0.26042 | 1 |
| ATTCTTT,MIR-186 | 252 | 50 | 0.39358 | 1.104  | 0.27939 | 1 |
| GAGACTG,MIR-452 | 91  | 18 | 0.44487 | 1.1238 | 0.28068 | 1 |
| TAGCTTT,MIR-9   | 224 | 31 | 0.39255 | 1.0988 | 0.28159 | 1 |
| AGTCTAG,MIR-151 | 21  | 7  | 0.58054 | 1.1664 | 0.30521 | 1 |
| TCTGGAC,MIR-198 | 82  | 14 | 0.43097 | 1.0979 | 0.3125  | 1 |
| TCGATGG,MIR-213 | 5   | 1  | 0.71651 | 1.1698 | 0.32438 | 1 |
| CAGCAGG,MIR-370 | 138 | 24 | 0.4084  | 1.0868 | 0.32634 | 1 |
| AGGGCCA,MIR-328 | 73  | 16 | 0.4467  | 1.094  | 0.32735 | 1 |
| CTGTTAC,MIR-194 | 97  | 14 | 0.41962 | 1.0821 | 0.33099 | 1 |
| GTAGGCA,MIR-189 | 27  | 5  | 0.51842 | 1.1038 | 0.33798 | 1 |
| AAACCAC,MIR-140 | 100 | 19 | 0.41019 | 1.0627 | 0.35714 | 1 |

---

ES: Enrichment score; NES: Normalized enrichment score; FDR: false discovery rate.

**Table S6. Transcription factor enrichment of *RRM2* co-expressed genes.**

| Gene Set                | Size | Leading Edge Number | ES       | NES     | P Value | FDR      |
|-------------------------|------|---------------------|----------|---------|---------|----------|
| V\$E2F_Q6               | 211  | 87                  | 0.785    | 2.1966  | 0       | 0        |
| V\$E2F_Q4               | 212  | 87                  | 0.78317  | 2.1905  | 0       | 0        |
| V\$E2F1_Q6              | 213  | 91                  | 0.7796   | 2.1891  | 0       | 0        |
| V\$E2F4DP1_01           | 220  | 91                  | 0.77488  | 2.1752  | 0       | 0        |
| V\$E2F1DP1_01           | 218  | 90                  | 0.77227  | 2.1731  | 0       | 0        |
| V\$E2F1DP2_01           | 218  | 90                  | 0.77227  | 2.1731  | 0       | 0        |
| V\$E2F4DP2_01           | 218  | 90                  | 0.77227  | 2.1731  | 0       | 0        |
| V\$E2F_02               | 218  | 90                  | 0.7726   | 2.1717  | 0       | 0        |
| V\$E2F_Q3               | 204  | 72                  | 0.7749   | 2.1687  | 0       | 0        |
| V\$E2F_Q3_01            | 215  | 81                  | 0.76436  | 2.1637  | 0       | 0        |
| V\$E2F_Q4_01            | 215  | 78                  | 0.76205  | 2.142   | 0       | 0        |
| V\$E2F1_Q4_01           | 210  | 79                  | 0.758    | 2.1365  | 0       | 0        |
| V\$E2F1_Q3              | 225  | 80                  | 0.75715  | 2.1273  | 0       | 0        |
| V\$E2F1DP1RB_01         | 210  | 78                  | 0.76148  | 2.1234  | 0       | 0        |
| V\$E2F_Q6_01            | 219  | 70                  | 0.75336  | 2.1228  | 0       | 0        |
| V\$E2F1_Q6_01           | 218  | 80                  | 0.75893  | 2.1214  | 0       | 0        |
| SGCGSSAAA_V\$E2F1DP2_01 | 155  | 71                  | 0.77674  | 2.1095  | 0       | 0        |
| V\$E2F_03               | 224  | 70                  | 0.71575  | 2.0304  | 0       | 0        |
| V\$E2F_01               | 64   | 27                  | 0.77208  | 1.8783  | 0       | 0        |
| V\$E2F1_Q4              | 222  | 52                  | 0.66606  | 1.8505  | 0       | 0        |
| RRCCGTTA_UNKNOWN        | 78   | 24                  | 0.71265  | 1.7656  | 0       | 0.000496 |
| V\$ELK1_02              | 226  | 69                  | 0.62339  | 1.744   | 0       | 0.000948 |
| TCCCRNNRTGC_UNKNOWN     | 193  | 46                  | 0.59797  | 1.6607  | 0       | 0.004716 |
| ACTAYRNNNCCCR_UNKNOWN   | 408  | 79                  | 0.56205  | 1.6486  | 0       | 0.005898 |
| V\$RSRFC4_Q2            | 198  | 46                  | -0.49165 | -1.6462 | 0       | 0.04539  |
| V\$FREAC4_01            | 140  | 38                  | -0.5024  | -1.6189 | 0       | 0.045556 |
| V\$DBP_Q6               | 227  | 46                  | -0.49205 | -1.6654 | 0       | 0.047884 |
| TGCCAAR_V\$NF1_Q6       | 660  | 147                 | -0.42171 | -1.5855 | 0       | 0.049956 |
| V\$PITX2_Q2             | 234  | 45                  | -0.47236 | -1.62   | 0       | 0.050129 |
| V\$GATA_Q6              | 185  | 51                  | -0.48818 | -1.6493 | 0       | 0.050278 |
| TGTTTGY_V\$HNF3_Q6      | 670  | 161                 | -0.42821 | -1.5945 | 0       | 0.052509 |

|                        |     |     |          |         |          |          |
|------------------------|-----|-----|----------|---------|----------|----------|
| V\$MEF2_01             | 134 | 32  | -0.49545 | -1.5892 | 0.008403 | 0.052623 |
| V\$GATA1_04            | 233 | 48  | -0.47387 | -1.6248 | 0        | 0.053014 |
| TGNNNNNNKCCAR_UNKNOWN  | 387 | 104 | -0.44683 | -1.6002 | 0        | 0.053271 |
| V\$RSRFC4_01           | 227 | 52  | -0.49853 | -1.6786 | 0        | 0.054867 |
| TGTNNNNNRGCARM_UNKNOWN | 81  | 24  | -0.5228  | -1.5592 | 0.00361  | 0.055927 |
| V\$MEF2_02             | 207 | 52  | -0.50548 | -1.6957 | 0        | 0.056862 |
| V\$PAX4_02             | 218 | 48  | -0.46434 | -1.5596 | 0        | 0.059456 |
| V\$FOXO1_01            | 221 | 67  | -0.45389 | -1.56   | 0        | 0.063275 |
| V\$GATA3_01            | 227 | 54  | -0.4511  | -1.5342 | 0        | 0.068002 |
| V\$RP58_01             | 194 | 45  | -0.45636 | -1.5373 | 0        | 0.069009 |
| V\$CREBP1_01           | 165 | 43  | -0.46521 | -1.5261 | 0        | 0.070251 |
| V\$MYOGENIN_Q6         | 235 | 62  | -0.44337 | -1.5227 | 0        | 0.070629 |
| V\$FOXO1_02            | 226 | 69  | -0.43889 | -1.5164 | 0        | 0.072111 |
| V\$LMO2COM_02          | 231 | 78  | -0.44297 | -1.5085 | 0        | 0.075907 |
| V\$SRY_01              | 204 | 77  | -0.42752 | -1.4565 | 0        | 0.07852  |
| V\$TBP_01              | 227 | 63  | -0.42622 | -1.4543 | 0        | 0.078579 |

---

ES: Enrichment score; NES: Normalized enrichment score; FDR: false discovery rate.

**Table S7. Correlation of *RRM2* with various immune signatures in LUAD.**

| Marker gene | Class                | None adjusted           |           | Tumor purity adjusted   |           |
|-------------|----------------------|-------------------------|-----------|-------------------------|-----------|
|             |                      | Correlation coefficient | P-value   | Correlation coefficient | P-value   |
| ADRM1       | Activated CD8 T cell | 0.360147979             | 3.228E-17 | 0.351837012             | 8.208E-16 |
| AHSA1       | Activated CD8 T cell | 0.382833693             | 0.000E+00 | 0.373605129             | 8.909E-18 |
| C1GALT1C1   | Activated CD8 T cell | 0.103701508             | 1.857E-02 | 0.111138025             | 1.355E-02 |
| CCT6B       | Activated CD8 T cell | -0.241358995            | 3.230E-08 | -0.253440203            | 1.154E-08 |
| CD37        | Activated CD8 T cell | -0.230337192            | 1.360E-07 | -0.255277093            | 8.966E-09 |
| CD3D        | Activated CD8 T cell | 0.023145162             | 6.002E-01 | 0.039896749             | 3.767E-01 |
| CD3E        | Activated CD8 T cell | -0.043120291            | 3.288E-01 | -0.036851024            | 4.143E-01 |
| CD3G        | Activated CD8 T cell | 0.049746543             | 2.598E-01 | 0.073297842             | 1.040E-01 |
| CD69        | Activated CD8 T cell | -0.127790219            | 3.696E-03 | -0.136689616            | 2.353E-03 |
| CD8A        | Activated CD8 T cell | 0.148752079             | 7.169E-04 | 0.174652611             | 9.696E-05 |
| CETN3       | Activated CD8 T cell | -0.050750054            | 2.503E-01 | -0.058872142            | 1.919E-01 |
| CSE1L       | Activated CD8 T cell | 0.616605359             | 0.000E+00 | 0.621608774             | 4.870E-54 |
| GEMIN6      | Activated CD8 T cell | 0.4567221               | 0.000E+00 | 0.456518947             | 9.448E-27 |
| GNLY        | Activated CD8 T cell | 0.166117287             | 1.556E-04 | 0.177993374             | 7.072E-05 |
| GPT2        | Activated CD8 T cell | 0.086827533             | 4.894E-02 | 0.084988454             | 5.934E-02 |
| GZMA        | Activated CD8 T cell | 0.171525399             | 9.364E-05 | 0.201576591             | 6.460E-06 |
| GZMH        | Activated CD8 T cell | 0.121145299             | 5.938E-03 | 0.139986904             | 1.835E-03 |
| GZMK        | Activated CD8 T cell | -0.01629093             | 7.122E-01 | -0.000579438            | 9.898E-01 |
| IL2RB       | Activated CD8 T cell | 0.196431637             | 7.402E-06 | 0.233795446             | 1.514E-07 |
| LCK         | Activated CD8 T cell | 0.059994749             | 1.740E-01 | 0.079489982             | 7.785E-02 |
| MPZL1       | Activated CD8 T cell | 0.038492936             | 3.832E-01 | 0.050876085             | 2.595E-01 |
| NKG7        | Activated CD8 T cell | 0.176754161             | 5.501E-05 | 0.208605072             | 2.990E-06 |
| PIK3IP1     | Activated CD8 T cell | -0.412759035            | 1.321E-22 | -0.419274053            | 2.074E-22 |

|           |                            |              |           |              |           |
|-----------|----------------------------|--------------|-----------|--------------|-----------|
| PTRH2     | Activated CD8 T cell       | 0.41532741   | 6.796E-23 | 0.42011879   | 1.676E-22 |
| TIMM13    | Activated CD8 T cell       | 0.146635857  | 8.448E-04 | 0.130921757  | 3.590E-03 |
| ZAP70     | Activated CD8 T cell       | -0.073759261 | 9.450E-02 | -0.084591416 | 6.054E-02 |
| ACTN4     | Central memory CD8 T cell  | 0.233436596  | 8.375E-08 | 0.22173301   | 6.599E-07 |
| ADAM12    | Central memory CD8 T cell  | 0.407463191  | 0.000E+00 | 0.438356246  | 1.444E-24 |
| ADCY9     | Central memory CD8 T cell  | -0.311383724 | 4.838E-13 | -0.327423576 | 8.779E-14 |
| F13A1     | Central memory CD8 T cell  | -0.088313319 | 4.518E-02 | -0.079696434 | 7.708E-02 |
| FCER1G    | Central memory CD8 T cell  | 0.125698815  | 4.277E-03 | 0.154425721  | 5.801E-04 |
| FCGR3B    | Central memory CD8 T cell  | 0.136869926  | 1.851E-03 | 0.15094456   | 7.730E-04 |
| FGF7      | Central memory CD8 T cell  | -0.096804577 | 2.808E-02 | -0.094579931 | 3.578E-02 |
| FKBP4     | Central memory CD8 T cell  | 0.49206522   | 9.297E-33 | 0.490250046  | 3.584E-31 |
| GLUD1     | Central memory CD8 T cell  | 0.065371013  | 1.385E-01 | 0.066018504  | 1.433E-01 |
| GM2A      | Central memory CD8 T cell  | 0.102457848  | 2.004E-02 | 0.117740794  | 8.877E-03 |
| GUSB      | Central memory CD8 T cell  | -0.084930679 | 5.410E-02 | -0.102950659 | 2.225E-02 |
| IL1RN     | Central memory CD8 T cell  | 0.148551157  | 7.290E-04 | 0.156662848  | 4.808E-04 |
| NOL11     | Central memory CD8 T cell  | 0.588920798  | 2.136E-49 | 0.586607732  | 6.583E-47 |
| NTRK1     | Central memory CD8 T cell  | -0.068487717 | 1.206E-01 | -0.08268745  | 6.659E-02 |
| RARA      | Central memory CD8 T cell  | -0.113982656 | 9.662E-03 | -0.131681108 | 3.399E-03 |
| RNF128    | Central memory CD8 T cell  | -0.057455592 | 1.929E-01 | -0.073363198 | 1.037E-01 |
| SIGLEC1   | Central memory CD8 T cell  | 0.015274636  | 7.294E-01 | 0.025050889  | 5.790E-01 |
| TNFRSF11A | Central memory CD8 T cell  | 0.111769837  | 1.114E-02 | 0.111166347  | 1.352E-02 |
| TOX4      | Central memory CD8 T cell  | 0.198328579  | 6.018E-06 | 0.18380612   | 4.029E-05 |
| UBA52     | Central memory CD8 T cell  | -0.033153438 | 4.527E-01 | -0.042816395 | 3.428E-01 |
| ULBP1     | Central memory CD8 T cell  | 0.212393466  | 1.221E-06 | 0.190643828  | 2.032E-05 |
| ACAP1     | Effector memory CD8 T cell | -0.096112993 | 2.919E-02 | -0.105099189 | 1.959E-02 |
| APOL3     | Effector memory CD8 T cell | 0.046828693  | 2.887E-01 | 0.07169997   | 1.118E-01 |

|          |                            |              |           |              |           |
|----------|----------------------------|--------------|-----------|--------------|-----------|
| ARHGAP10 | Effector memory CD8 T cell | 0.211813894  | 1.307E-06 | 0.211043828  | 2.274E-06 |
| ATP10D   | Effector memory CD8 T cell | 0.152202454  | 5.358E-04 | 0.167945969  | 1.795E-04 |
| C3AR1    | Effector memory CD8 T cell | 0.057799146  | 1.903E-01 | 0.08210883   | 6.852E-02 |
| CCR5     | Effector memory CD8 T cell | 0.063536314  | 1.499E-01 | 0.093098352  | 3.879E-02 |
| CD160    | Effector memory CD8 T cell | -0.048398818 | 2.728E-01 | -0.053881382 | 2.324E-01 |
| CD55     | Effector memory CD8 T cell | -0.322937431 | 7.785E-14 | -0.34093521  | 6.958E-15 |
| CFLAR    | Effector memory CD8 T cell | 0.134204569  | 2.273E-03 | 0.145269031  | 1.219E-03 |
| CMKLR1   | Effector memory CD8 T cell | 0.023379996  | 5.966E-01 | 0.041262358  | 3.606E-01 |
| DAPP1    | Effector memory CD8 T cell | 0.116752954  | 8.027E-03 | 0.131327144  | 3.487E-03 |
| FCRL6    | Effector memory CD8 T cell | -0.135143856 | 2.132E-03 | -0.143210445 | 1.432E-03 |
| FLT3LG   | Effector memory CD8 T cell | -0.115497345 | 8.735E-03 | -0.112334502 | 1.257E-02 |
| GZMM     | Effector memory CD8 T cell | 0.002455605  | 9.557E-01 | -0.007895038 | 8.612E-01 |
| HAPLN3   | Effector memory CD8 T cell | 0.325351357  | 3.663E-14 | 0.381358332  | 1.634E-18 |
| HLA-DMB  | Effector memory CD8 T cell | -0.172541605 | 8.498E-05 | -0.175518258 | 8.940E-05 |
| HLA-DPA1 | Effector memory CD8 T cell | -0.25197869  | 7.566E-09 | -0.25862062  | 5.638E-09 |
| HLA-DPB1 | Effector memory CD8 T cell | -0.330364083 | 1.403E-14 | -0.347789815 | 1.833E-15 |
| IFI16    | Effector memory CD8 T cell | 0.216191216  | 7.788E-07 | 0.242541383  | 4.946E-08 |
| LIME1    | Effector memory CD8 T cell | -0.126836037 | 3.961E-03 | -0.121362204 | 6.980E-03 |
| LTK      | Effector memory CD8 T cell | 0.017947064  | 6.844E-01 | -0.001913152 | 9.662E-01 |
| NFKBIA   | Effector memory CD8 T cell | -0.075314978 | 8.774E-02 | -0.080789768 | 7.310E-02 |
| SETD7    | Effector memory CD8 T cell | 0.176385446  | 5.705E-05 | 0.181526175  | 5.034E-05 |
| SIK1     | Effector memory CD8 T cell | -0.126428887 | 4.057E-03 | -0.140279604 | 1.795E-03 |
| TRIB2    | Effector memory CD8 T cell | 0.091361938  | 3.824E-02 | 0.093448621  | 3.806E-02 |
| AIM2     | Activated CD4 T cell       | 0.217340345  | 6.787E-07 | 0.252603654  | 1.293E-08 |
| BIRC3    | Activated CD4 T cell       | 0.119637157  | 6.564E-03 | 0.142376256  | 1.528E-03 |
| BRIP1    | Activated CD4 T cell       | 0.768578602  | 0.000E+00 | 0.766278594  | 2.186E-96 |

|         |                           |              |            |              |            |
|---------|---------------------------|--------------|------------|--------------|------------|
| CCL20   | Activated CD4 T cell      | 0.159605425  | 2.763E-04  | 0.169788161  | 1.519E-04  |
| CCL4    | Activated CD4 T cell      | 0.278366854  | 1.282E-10  | 0.318943179  | 4.046E-13  |
| CCL5    | Activated CD4 T cell      | 0.117288514  | 7.712E-03  | 0.14391605   | 1.355E-03  |
| CCNB1   | Activated CD4 T cell      | 0.873300224  | 0.000E+00  | 0.874181398  | 3.775E-156 |
| CCR7    | Activated CD4 T cell      | -0.177681412 | 5.157E-05  | -0.200038396 | 7.619E-06  |
| DUSP2   | Activated CD4 T cell      | 0.051258288  | 2.455E-01  | 0.053398753  | 2.366E-01  |
| ESCO2   | Activated CD4 T cell      | 0.839766987  | 3.570E-138 | 0.844636638  | 2.434E-135 |
| ETS1    | Activated CD4 T cell      | 0.030789903  | 4.855E-01  | 0.04629906   | 3.049E-01  |
| EXO1    | Activated CD4 T cell      | 0.870028983  | 0.000E+00  | 0.868718344  | 6.311E-152 |
| EXOC6   | Activated CD4 T cell      | 0.170462454  | 1.036E-04  | 0.157850343  | 4.348E-04  |
| IARS    | Activated CD4 T cell      | 0.445665692  | 1.695E-26  | 0.451816198  | 3.577E-26  |
| ITK     | Activated CD4 T cell      | -0.043112208 | 3.287E-01  | -0.038810047 | 3.899E-01  |
| KIF11   | Activated CD4 T cell      | 0.855602771  | 8.079E-149 | 0.858239682  | 2.474E-144 |
| KNTC1   | Activated CD4 T cell      | 0.681038838  | 0.000E+00  | 0.681450558  | 1.436E-68  |
| NUF2    | Activated CD4 T cell      | 0.819107088  | 0.000E+00  | 0.821711725  | 5.488E-122 |
| PRC1    | Activated CD4 T cell      | 0.855665236  | 7.292E-149 | 0.862049011  | 5.077E-147 |
| PSAT1   | Activated CD4 T cell      | 0.494258219  | 0.000E+00  | 0.489858727  | 4.060E-31  |
| RGS1    | Activated CD4 T cell      | 0.032635012  | 4.598E-01  | 0.035253737  | 4.348E-01  |
| RTKN2   | Activated CD4 T cell      | 0.213883483  | 9.643E-07  | 0.204912748  | 4.496E-06  |
| SAMSN1  | Activated CD4 T cell      | 0.064908592  | 1.413E-01  | 0.090501533  | 4.459E-02  |
| SELL    | Activated CD4 T cell      | -0.031476746 | 4.760E-01  | -0.028099547 | 5.336E-01  |
| TRAT1   | Activated CD4 T cell      | -0.043023392 | 3.298E-01  | -0.032930997 | 4.657E-01  |
| ABHD3   | Central memory CD4 T cell | 0.293903728  | 1.273E-11  | 0.29717394   | 1.647E-11  |
| AHNAK   | Central memory CD4 T cell | -0.113818633 | 9.767E-03  | -0.115885258 | 1.002E-02  |
| ANXA2P2 | Central memory CD4 T cell | 0.181187662  | 3.639E-05  | 0.195696521  | 1.206E-05  |
| AQP3    | Central memory CD4 T cell | -0.500860365 | 4.674E-34  | -0.502918301 | 5.791E-33  |



|        |                            |              |           |              |           |
|--------|----------------------------|--------------|-----------|--------------|-----------|
| ATHL1  | Central memory CD4 T cell  | -0.164878195 | 1.744E-04 | -0.177306024 | 7.550E-05 |
| BMI1   | Central memory CD4 T cell  | 0.149813354  | 6.559E-04 | 0.159119758  | 3.901E-04 |
| BZW2   | Central memory CD4 T cell  | 0.427667311  | 0.000E+00 | 0.418262908  | 2.675E-22 |
| CD63   | Central memory CD4 T cell  | -0.271010016 | 4.036E-10 | -0.266937112 | 1.728E-09 |
| COL4A1 | Central memory CD4 T cell  | 0.17930504   | 4.391E-05 | 0.177624873  | 7.325E-05 |
| CYLD   | Central memory CD4 T cell  | -0.009592859 | 8.281E-01 | 0.005888685  | 8.962E-01 |
| ELMO2  | Central memory CD4 T cell  | 0.0133234    | 7.629E-01 | 0.004856038  | 9.144E-01 |
| FYN    | Central memory CD4 T cell  | 0.035746931  | 4.182E-01 | 0.038474174  | 3.940E-01 |
| GLIPR1 | Central memory CD4 T cell  | 0.08644449   | 4.994E-02 | 0.117398473  | 9.079E-03 |
| GSS    | Central memory CD4 T cell  | 0.457082936  | 5.976E-28 | 0.443523412  | 3.560E-25 |
| IFITM2 | Central memory CD4 T cell  | -0.258073996 | 3.193E-09 | -0.262614734 | 3.211E-09 |
| ITGB1  | Central memory CD4 T cell  | 0.375148671  | 0.000E+00 | 0.378777846  | 2.888E-18 |
| ITGB2  | Central memory CD4 T cell  | -0.052195602 | 2.369E-01 | -0.042357961 | 3.480E-01 |
| KLF5   | Central memory CD4 T cell  | -0.071915648 | 1.031E-01 | -0.084219421 | 6.169E-02 |
| LSP1   | Central memory CD4 T cell  | -0.100026446 | 2.320E-02 | -0.105629186 | 1.898E-02 |
| NDUFB9 | Central memory CD4 T cell  | 0.176298727  | 5.754E-05 | 0.180977104  | 5.310E-05 |
| PKM2   | Central memory CD4 T cell  | 0.411813727  | 1.684E-22 | 0.414604666  | 6.670E-22 |
| SFXN3  | Central memory CD4 T cell  | -0.078908204 | 7.360E-02 | -0.081129827 | 7.190E-02 |
| SIRPG  | Central memory CD4 T cell  | 0.121289907  | 5.878E-03 | 0.15793775   | 4.315E-04 |
| SMAD4  | Central memory CD4 T cell  | 0.021543189  | 6.256E-01 | 0.022001328  | 6.260E-01 |
| STX4   | Central memory CD4 T cell  | 0.043174672  | 3.280E-01 | 0.038137835  | 3.981E-01 |
| TRADD  | Central memory CD4 T cell  | -0.297596931 | 6.882E-12 | -0.308808692 | 2.360E-12 |
| VIM    | Central memory CD4 T cell  | -0.041875752 | 3.428E-01 | -0.037685267 | 4.038E-01 |
| XRCC6  | Central memory CD4 T cell  | 0.235671859  | 6.842E-08 | 0.227106258  | 3.460E-07 |
| ATM    | Effector memory CD4 T cell | 0.019881872  | 6.525E-01 | 0.03174267   | 4.819E-01 |
| CASP3  | Effector memory CD4 T cell | 0.432176951  | 7.520E-25 | 0.43469157   | 3.842E-24 |

|          |                            |              |           |              |           |
|----------|----------------------------|--------------|-----------|--------------|-----------|
| CASQ1    | Effector memory CD4 T cell | -0.159344606 | 2.828E-04 | -0.155520127 | 5.293E-04 |
| CD300E   | Effector memory CD4 T cell | 0.177735721  | 4.992E-05 | 0.19210614   | 1.749E-05 |
| DARS     | Effector memory CD4 T cell | 0.532587978  | 4.548E-39 | 0.54468592   | 1.966E-39 |
| DOCK9    | Effector memory CD4 T cell | -0.191391545 | 1.271E-05 | -0.193609544 | 1.498E-05 |
| EXOSC9   | Effector memory CD4 T cell | 0.485681391  | 0.000E+00 | 0.483695939  | 2.833E-30 |
| EZH2     | Effector memory CD4 T cell | 0.730151178  | 6.815E-87 | 0.725768243  | 8.545E-82 |
| GDE1     | Effector memory CD4 T cell | -0.193677592 | 9.961E-06 | -0.210142159 | 2.517E-06 |
| IL34     | Effector memory CD4 T cell | -0.230170494 | 1.279E-07 | -0.248845802 | 2.149E-08 |
| NCOA4    | Effector memory CD4 T cell | -0.049219155 | 2.649E-01 | -0.047766818 | 2.898E-01 |
| NEFL     | Effector memory CD4 T cell | -0.0991373   | 2.446E-02 | -0.097568338 | 3.031E-02 |
| PDGFRL   | Effector memory CD4 T cell | 0.068922991  | 1.182E-01 | 0.074400139  | 9.893E-02 |
| PTGS1    | Effector memory CD4 T cell | -0.018549172 | 6.745E-01 | -0.00171573  | 9.697E-01 |
| REPS1    | Effector memory CD4 T cell | 0.363957941  | 1.415E-17 | 0.370541374  | 1.720E-17 |
| SCG2     | Effector memory CD4 T cell | -0.020775522 | 6.380E-01 | -0.01010571  | 8.229E-01 |
| SDPR     | Effector memory CD4 T cell | -0.396680193 | 7.441E-21 | -0.393285692 | 1.100E-19 |
| SIGLEC14 | Effector memory CD4 T cell | 0.053227285  | 2.279E-01 | 0.069386672  | 1.239E-01 |
| SIGLEC6  | Effector memory CD4 T cell | -0.193294709 | 9.979E-06 | -0.213658537 | 1.690E-06 |
| TAL1     | Effector memory CD4 T cell | -0.315171239 | 2.435E-13 | -0.324738575 | 1.431E-13 |
| TFEC     | Effector memory CD4 T cell | 0.077678426  | 7.821E-02 | 0.101651334  | 2.400E-02 |
| TIPIN    | Effector memory CD4 T cell | 0.614613535  | 0.000E+00 | 0.619077457  | 1.713E-53 |
| TPK1     | Effector memory CD4 T cell | -0.176943702 | 5.545E-05 | -0.180757974 | 5.423E-05 |
| UQCRB    | Effector memory CD4 T cell | -0.032884914 | 4.565E-01 | -0.015190133 | 7.365E-01 |
| USP9Y    | Effector memory CD4 T cell | -0.03480317  | 4.306E-01 | -0.040373572 | 3.710E-01 |
| WIPF1    | Effector memory CD4 T cell | 0.105248484  | 1.688E-02 | 0.139251668  | 1.941E-03 |
| ZCRB1    | Effector memory CD4 T cell | 0.27722041   | 1.536E-10 | 0.277934452  | 3.394E-10 |
| B3GAT1   | T follicular helper cell   | -0.21239413  | 1.151E-06 | -0.220106891 | 7.998E-07 |

|          |                          |              |           |              |           |
|----------|--------------------------|--------------|-----------|--------------|-----------|
| CDK5R1   | T follicular helper cell | 0.464063272  | 7.258E-29 | 0.47368644   | 6.119E-29 |
| PDCD1    | T follicular helper cell | 0.180381347  | 3.832E-05 | 0.215009209  | 1.448E-06 |
| BCL6     | T follicular helper cell | -0.138650282 | 1.624E-03 | -0.140864212 | 1.716E-03 |
| CD200    | T follicular helper cell | 0.03522108   | 4.250E-01 | 0.039790856  | 3.780E-01 |
| CD83     | T follicular helper cell | -0.150386074 | 6.250E-04 | -0.165325504 | 2.270E-04 |
| CD84     | T follicular helper cell | 0.041452648  | 3.478E-01 | 0.059587927  | 1.865E-01 |
| FGF2     | T follicular helper cell | -0.083679727 | 5.775E-02 | -0.081317104 | 7.124E-02 |
| GPR18    | T follicular helper cell | -0.05113112  | 2.467E-01 | -0.044248016 | 3.269E-01 |
| CEBPA    | T follicular helper cell | -0.373762511 | 0.000E+00 | -0.384317151 | 8.454E-19 |
| CECR1    | T follicular helper cell | -0.104448396 | 1.777E-02 | -0.118302981 | 8.555E-03 |
| CLEC10A  | T follicular helper cell | -0.159176123 | 2.919E-04 | -0.162916537 | 2.807E-04 |
| CLEC4A   | T follicular helper cell | -0.027942909 | 5.268E-01 | -0.012787568 | 7.770E-01 |
| CSF1R    | T follicular helper cell | -0.019182072 | 6.641E-01 | -0.004548127 | 9.198E-01 |
| CTSS     | T follicular helper cell | -0.059142608 | 1.802E-01 | -0.049349209 | 2.741E-01 |
| SYNM     | T follicular helper cell | 0.006732686  | 8.788E-01 | -0.001511115 | 9.733E-01 |
| DPP4     | T follicular helper cell | -0.167616953 | 1.354E-04 | -0.169686464 | 1.534E-04 |
| LRR32    | T follicular helper cell | -0.065906174 | 1.352E-01 | -0.076364577 | 9.031E-02 |
| MC5R     | T follicular helper cell | -0.311091283 | 5.100E-13 | -0.311273927 | 1.546E-12 |
| MICA     | T follicular helper cell | -0.071220461 | 1.064E-01 | -0.077541959 | 8.545E-02 |
| NCAM1    | T follicular helper cell | -0.160221545 | 2.614E-04 | -0.16200302  | 3.041E-04 |
| NCR2     | T follicular helper cell | 0.017153756  | 6.977E-01 | 0.027714564  | 5.393E-01 |
| NRP1     | T follicular helper cell | 0.028603922  | 5.171E-01 | 0.031795817  | 4.812E-01 |
| PDCD1LG2 | T follicular helper cell | 0.208329607  | 1.957E-06 | 0.253217589  | 1.189E-08 |
| PDCD6    | T follicular helper cell | 0.19931799   | 5.399E-06 | 0.194381714  | 1.383E-05 |
| PRDX1    | T follicular helper cell | 0.207959483  | 1.936E-06 | 0.205201733  | 4.356E-06 |
| RAE1     | T follicular helper cell | 0.478627423  | 0.000E+00 | 0.478183588  | 1.558E-29 |

|          |                          |              |           |              |           |
|----------|--------------------------|--------------|-----------|--------------|-----------|
| RAET1E   | T follicular helper cell | 0.285624423  | 3.998E-11 | 0.297679019  | 1.517E-11 |
| SIGLEC7  | T follicular helper cell | 0.079365308  | 7.194E-02 | 0.098383596  | 2.895E-02 |
| SIGLEC9  | T follicular helper cell | 0.054840972  | 2.141E-01 | 0.069672019  | 1.224E-01 |
| TYRO3    | T follicular helper cell | 0.236266591  | 5.772E-08 | 0.238057086  | 8.825E-08 |
| CHST12   | T follicular helper cell | -0.07889731  | 7.364E-02 | -0.099593389 | 2.702E-02 |
| CLIC3    | T follicular helper cell | -0.426375507 | 0.000E+00 | -0.448660215 | 8.641E-26 |
| IVNS1ABP | T follicular helper cell | 0.129783097  | 3.192E-03 | 0.126891508  | 4.777E-03 |
| KIR2DL3  | T follicular helper cell | 0.17872658   | 4.523E-05 | 0.194823318  | 1.321E-05 |
| LGMN     | T follicular helper cell | -0.052328527 | 2.358E-01 | -0.048928913 | 2.782E-01 |
| ACP5     | Gamma delta T cell       | -0.085639618 | 5.210E-02 | -0.097462461 | 3.049E-02 |
| AQP9     | Gamma delta T cell       | 0.22909854   | 1.592E-07 | 0.250486572  | 1.723E-08 |
| BTN3A2   | Gamma delta T cell       | 0.003369901  | 9.392E-01 | 0.004108811  | 9.275E-01 |
| C1orf54  | Gamma delta T cell       | 0.001063472  | 9.808E-01 | 0.010812369  | 8.107E-01 |
| CARD8    | Gamma delta T cell       | -0.097698844 | 2.662E-02 | -0.100567793 | 2.555E-02 |
| CCL18    | Gamma delta T cell       | 0.074463016  | 9.140E-02 | 0.096165997  | 3.278E-02 |
| CD209    | Gamma delta T cell       | 0.145137944  | 9.663E-04 | 0.164365746  | 2.471E-04 |
| CD33     | Gamma delta T cell       | -0.114305256 | 9.457E-03 | -0.107282993 | 1.718E-02 |
| CD36     | Gamma delta T cell       | -0.164870464 | 1.745E-04 | -0.163027662 | 2.780E-04 |
| CDK5     | Gamma delta T cell       | 0.256286081  | 4.121E-09 | 0.250938999  | 1.621E-08 |
| IL10RB   | Gamma delta T cell       | 0.159117788  | 2.935E-04 | 0.151493834  | 7.390E-04 |
| KLRF1    | Gamma delta T cell       | 0.021444526  | 6.273E-01 | 0.00254158   | 9.551E-01 |
| LGALS1   | Gamma delta T cell       | 0.214011823  | 1.009E-06 | 0.227763359  | 3.193E-07 |
| MAPK7    | Gamma delta T cell       | 0.091205121  | 3.854E-02 | 0.089435187  | 4.718E-02 |
| KLHL7    | Gamma delta T cell       | 0.399865759  | 0.000E+00 | 0.389742942  | 2.480E-19 |
| KRT80    | Gamma delta T cell       | 0.356123111  | 6.932E-17 | 0.348301527  | 1.657E-15 |
| LAMC1    | Gamma delta T cell       | 0.248099676  | 1.295E-08 | 0.244637222  | 3.758E-08 |

|          |                      |              |           |              |           |
|----------|----------------------|--------------|-----------|--------------|-----------|
| LCORL    | Gamma delta T cell   | 0.174431962  | 6.908E-05 | 0.17344565   | 1.085E-04 |
| LMBN1    | Gamma delta T cell   | 0.758790972  | 0.000E+00 | 0.762670474  | 5.716E-95 |
| MEIS3P1  | Gamma delta T cell   | -0.136627709 | 1.901E-03 | -0.140332525 | 1.787E-03 |
| MPL      | Gamma delta T cell   | -0.230265816 | 1.264E-07 | -0.2261167   | 3.901E-07 |
| FABP1    | Gamma delta T cell   | -0.034093184 | 4.401E-01 | -0.021567513 | 6.329E-01 |
| FABP5    | Gamma delta T cell   | 0.077014425  | 8.080E-02 | 0.070324513  | 1.189E-01 |
| FADD     | Gamma delta T cell   | 0.37529948   | 1.138E-18 | 0.370091472  | 1.893E-17 |
| MFAP3L   | Gamma delta T cell   | -0.034690882 | 4.321E-01 | -0.039343653 | 3.834E-01 |
| MINPP1   | Gamma delta T cell   | 0.344041175  | 1.173E-15 | 0.35193337   | 8.051E-16 |
| RPS24    | Gamma delta T cell   | -0.101734195 | 2.094E-02 | -0.097040035 | 3.122E-02 |
| RPS7     | Gamma delta T cell   | 0.241870881  | 2.724E-08 | 0.248271796  | 2.320E-08 |
| RPS9     | Gamma delta T cell   | -0.269768853 | 4.881E-10 | -0.266956602 | 1.723E-09 |
| DBNL     | Gamma delta T cell   | 0.094426727  | 3.216E-02 | 0.077714651  | 8.475E-02 |
| CCL13    | Gamma delta T cell   | -0.09654778  | 2.850E-02 | -0.087620692 | 5.186E-02 |
| CD70     | Type 1 T helper cell | 0.160494625  | 2.551E-04 | 0.190670031  | 2.026E-05 |
| TBX21    | Type 1 T helper cell | 0.042249131  | 3.385E-01 | 0.053864849  | 2.325E-01 |
| ADAM8    | Type 1 T helper cell | 0.010973044  | 8.037E-01 | 0.004535602  | 9.200E-01 |
| AHCYL2   | Type 1 T helper cell | -0.383713638 | 0.000E+00 | -0.392067898 | 1.456E-19 |
| ALCAM    | Type 1 T helper cell | -0.17219388  | 8.786E-05 | -0.193743532 | 1.478E-05 |
| B3GALNT1 | Type 1 T helper cell | 0.407352671  | 0.000E+00 | 0.422105701  | 1.012E-22 |
| BBS12    | Type 1 T helper cell | 0.002742404  | 9.505E-01 | 0.00611586   | 8.923E-01 |
| BST1     | Type 1 T helper cell | 0.06378534   | 1.483E-01 | 0.079945523  | 7.616E-02 |
| CD151    | Type 1 T helper cell | -0.264913787 | 1.017E-09 | -0.265118419 | 2.246E-09 |
| CD47     | Type 1 T helper cell | -0.106767388 | 1.539E-02 | -0.121119983 | 7.094E-03 |
| CD48     | Type 1 T helper cell | -0.111311545 | 1.151E-02 | -0.110958691 | 1.370E-02 |
| CD52     | Type 1 T helper cell | -0.241309621 | 3.251E-08 | -0.263761933 | 2.727E-09 |

|         |                      |              |           |              |           |
|---------|----------------------|--------------|-----------|--------------|-----------|
| CD53    | Type 1 T helper cell | 0.015275163  | 7.294E-01 | 0.040856501  | 3.653E-01 |
| CD59    | Type 1 T helper cell | -0.293662795 | 1.057E-11 | -0.288296021 | 6.846E-11 |
| CD6     | Type 1 T helper cell | -0.046635414 | 2.907E-01 | -0.038866315 | 3.892E-01 |
| CD68    | Type 1 T helper cell | 0.109513175  | 1.293E-02 | 0.131194536  | 3.520E-03 |
| CD7     | Type 1 T helper cell | 0.185621562  | 2.319E-05 | 0.214366645  | 1.559E-06 |
| CD96    | Type 1 T helper cell | -0.029361882 | 5.061E-01 | -0.028573118 | 5.268E-01 |
| CFHR3   | Type 1 T helper cell | 0.027572776  | 5.324E-01 | 0.019108076  | 6.721E-01 |
| CHRM3   | Type 1 T helper cell | 0.030400551  | 4.912E-01 | 0.023532588  | 6.022E-01 |
| CLEC7A  | Type 1 T helper cell | 0.040039517  | 3.644E-01 | 0.05809209   | 1.979E-01 |
| COL23A1 | Type 1 T helper cell | -0.061817276 | 1.612E-01 | -0.049574512 | 2.719E-01 |
| COL4A4  | Type 1 T helper cell | -0.325819267 | 3.351E-14 | -0.34492087  | 3.216E-15 |
| COL5A3  | Type 1 T helper cell | 0.215711182  | 8.247E-07 | 0.220451847  | 7.679E-07 |
| DAB1    | Type 1 T helper cell | 0.009607676  | 8.278E-01 | 0.027645765  | 5.403E-01 |
| DLEU7   | Type 1 T helper cell | 0.04744375   | 2.825E-01 | 0.046080722  | 3.072E-01 |
| DOC2B   | Type 1 T helper cell | -0.066717037 | 1.305E-01 | -0.057776674 | 2.003E-01 |
| EMP1    | Type 1 T helper cell | 0.050363847  | 2.538E-01 | 0.057689174  | 2.010E-01 |
| F12     | Type 1 T helper cell | 0.385645195  | 0.000E+00 | 0.379374314  | 2.533E-18 |
| FURIN   | Type 1 T helper cell | 0.00147498   | 9.734E-01 | -0.005823482 | 8.974E-01 |
| GAB3    | Type 1 T helper cell | -0.197035106 | 6.932E-06 | -0.214292102 | 1.572E-06 |
| GATM    | Type 1 T helper cell | -0.033197893 | 4.522E-01 | -0.026184426 | 5.619E-01 |
| GFPT2   | Type 1 T helper cell | 0.27909864   | 1.142E-10 | 0.32577486   | 1.186E-13 |
| GPR25   | Type 1 T helper cell | -0.104572989 | 1.760E-02 | -0.107343279 | 1.711E-02 |
| GREM2   | Type 1 T helper cell | -0.261200175 | 1.766E-09 | -0.249911288 | 1.862E-08 |
| HAVCR1  | Type 1 T helper cell | -0.021497473 | 6.265E-01 | -0.025853555 | 5.669E-01 |
| HSD11B1 | Type 1 T helper cell | 0.11819657   | 7.277E-03 | 0.151542185  | 7.361E-04 |
| HUNK    | Type 1 T helper cell | -0.187410971 | 1.928E-05 | -0.19801186  | 9.452E-06 |

|          |                      |              |           |              |           |
|----------|----------------------|--------------|-----------|--------------|-----------|
| IGF2     | Type 1 T helper cell | -0.051703619 | 2.414E-01 | -0.063939461 | 1.563E-01 |
| RCSD1    | Type 1 T helper cell | -0.146728715 | 8.480E-04 | -0.157758901 | 4.382E-04 |
| RYR1     | Type 1 T helper cell | -0.010891296 | 8.052E-01 | -0.026009676 | 5.645E-01 |
| SAV1     | Type 1 T helper cell | 0.128012492  | 3.614E-03 | 0.129759108  | 3.902E-03 |
| SELE     | Type 1 T helper cell | -0.040340506 | 3.609E-01 | -0.033133555 | 4.629E-01 |
| SELP     | Type 1 T helper cell | -0.309082779 | 9.573E-13 | -0.316767289 | 5.942E-13 |
| SH3KBP1  | Type 1 T helper cell | 0.154923993  | 4.240E-04 | 0.169326301  | 1.585E-04 |
| SIT1     | Type 1 T helper cell | -0.065085969 | 1.402E-01 | -0.064441437 | 1.531E-01 |
| SLC35B3  | Type 1 T helper cell | 0.090228534  | 4.070E-02 | 0.090834744  | 4.381E-02 |
| SIGLEC10 | Type 1 T helper cell | 0.163255621  | 2.023E-04 | 0.196081714  | 1.158E-05 |
| SKAP1    | Type 1 T helper cell | 0.08100106   | 6.626E-02 | 0.087637275  | 5.182E-02 |
| THUMPD2  | Type 1 T helper cell | 0.237976706  | 5.059E-08 | 0.228911155  | 2.775E-07 |
| TIGIT    | Type 1 T helper cell | 0.120227225  | 6.329E-03 | 0.156154902  | 5.018E-04 |
| ZEB2     | Type 1 T helper cell | -0.061696653 | 1.620E-01 | -0.057198596 | 2.049E-01 |
| ENC1     | Type 1 T helper cell | -0.185791827 | 2.205E-05 | -0.205031917 | 4.438E-06 |
| FAM134B  | Type 1 T helper cell | -0.131780017 | 2.751E-03 | -0.138616605 | 2.036E-03 |
| FBXO30   | Type 1 T helper cell | 0.41047674   | 2.372E-22 | 0.424161451  | 5.989E-23 |
| FCGR2C   | Type 1 T helper cell | 0.039541825  | 3.705E-01 | 0.059423163  | 1.878E-01 |
| STAC     | Type 1 T helper cell | -0.097967587 | 2.624E-02 | -0.10303505  | 2.214E-02 |
| LTC4S    | Type 1 T helper cell | -0.485688386 | 7.703E-32 | -0.49174858  | 2.220E-31 |
| MAN1B1   | Type 1 T helper cell | 0.103946401  | 1.830E-02 | 0.097326791  | 3.072E-02 |
| MDH1     | Type 1 T helper cell | 0.557490934  | 2.162E-43 | 0.558181306  | 1.006E-41 |
| MMD      | Type 1 T helper cell | 0.538810528  | 0.000E+00 | 0.542809792  | 4.017E-39 |
| RGS16    | Type 1 T helper cell | -0.138879845 | 1.595E-03 | -0.143981441 | 1.348E-03 |
| IL12A    | Type 1 T helper cell | 0.143761583  | 1.070E-03 | 0.131185691  | 3.523E-03 |
| P2RX5    | Type 1 T helper cell | 0.157620494  | 3.350E-04 | 0.187654896  | 2.749E-05 |

|          |                       |              |           |              |           |
|----------|-----------------------|--------------|-----------|--------------|-----------|
| CD97     | Type 1 T helper cell  | -0.178607392 | 4.706E-05 | -0.172489717 | 1.186E-04 |
| ITGB4    | Type 1 T helper cell  | 0.05412953   | 2.200E-01 | 0.049408438  | 2.735E-01 |
| ICAM3    | Type 1 T helper cell  | -0.146288614 | 8.695E-04 | -0.163619385 | 2.639E-04 |
| METRNL   | Type 1 T helper cell  | 0.090878043  | 3.925E-02 | 0.087673025  | 5.172E-02 |
| TNFRSF1A | Type 1 T helper cell  | 0.104820282  | 1.737E-02 | 0.114577811  | 1.090E-02 |
| IRF1     | Type 1 T helper cell  | 0.228454307  | 1.727E-07 | 0.25555895   | 8.625E-09 |
| HTR2B    | Type 1 T helper cell  | -0.06853898  | 1.203E-01 | -0.075892529 | 9.233E-02 |
| CALD1    | Type 1 T helper cell  | 0.129783144  | 3.172E-03 | 0.145058577  | 1.239E-03 |
| MOCOS    | Type 1 T helper cell  | 0.405338813  | 8.723E-22 | 0.410304366  | 1.924E-21 |
| TRAF3IP2 | Type 1 T helper cell  | 0.010991317  | 8.034E-01 | 0.012993284  | 7.735E-01 |
| TLR8     | Type 1 T helper cell  | 0.04221601   | 3.389E-01 | 0.067064046  | 1.370E-01 |
| TRAF1    | Type 1 T helper cell  | -0.028917912 | 5.125E-01 | -0.028684063 | 5.252E-01 |
| DUSP14   | Type 1 T helper cell  | 0.470453581  | 0.000E+00 | 0.463285764  | 1.341E-27 |
| IL17A    | Type 17 T helper cell | 0.086923335  | 4.866E-02 | 0.085109304  | 5.898E-02 |
| IL17RA   | Type 17 T helper cell | 0.064714523  | 1.425E-01 | 0.056476172  | 2.106E-01 |
| C2CD4A   | Type 17 T helper cell | 0.227589912  | 1.926E-07 | 0.233307504  | 1.609E-07 |
| C2CD4B   | Type 17 T helper cell | 0.007903427  | 8.579E-01 | 0.005019108  | 9.115E-01 |
| CA2      | Type 17 T helper cell | -0.149329103 | 6.831E-04 | -0.16873042  | 1.673E-04 |
| CCDC65   | Type 17 T helper cell | -0.227857125 | 1.720E-07 | -0.22951994  | 2.575E-07 |
| CEACAM3  | Type 17 T helper cell | -0.007880921 | 8.584E-01 | -0.006468205 | 8.861E-01 |
| IL17C    | Type 17 T helper cell | 0.165850155  | 1.563E-04 | 0.15419616   | 5.913E-04 |
| IL17F    | Type 17 T helper cell | -0.097088229 | 2.759E-02 | -0.085501922 | 5.781E-02 |
| IL17RC   | Type 17 T helper cell | -0.193955737 | 9.669E-06 | -0.211040618 | 2.275E-06 |
| IL17RE   | Type 17 T helper cell | -0.395775895 | 0.000E+00 | -0.424033019 | 6.189E-23 |
| IL23A    | Type 17 T helper cell | 0.284979262  | 5.430E-11 | 0.291117373  | 4.377E-11 |
| ILDR1    | Type 17 T helper cell | -0.181794821 | 3.423E-05 | -0.20405154  | 4.940E-06 |



|          |                       |              |           |              |           |
|----------|-----------------------|--------------|-----------|--------------|-----------|
| LONRF3   | Type 17 T helper cell | -0.068930545 | 1.182E-01 | -0.094405897 | 3.613E-02 |
| SH2D6    | Type 17 T helper cell | -0.110229765 | 1.231E-02 | -0.121234924 | 7.040E-03 |
| TNIP2    | Type 17 T helper cell | 0.240293771  | 3.371E-08 | 0.238392527  | 8.454E-08 |
| ABCA1    | Type 17 T helper cell | 0.130653027  | 2.993E-03 | 0.142269105  | 1.540E-03 |
| ABCB1    | Type 17 T helper cell | -0.095326261 | 3.054E-02 | -0.104694878 | 2.007E-02 |
| ADAMTS12 | Type 17 T helper cell | 0.278233749  | 1.572E-10 | 0.295159765  | 2.285E-11 |
| ANK1     | Type 17 T helper cell | -0.055854588 | 2.057E-01 | -0.045266486 | 3.158E-01 |
| ANKRD22  | Type 17 T helper cell | 0.056769453  | 1.983E-01 | 0.074751052  | 9.735E-02 |
| B3GALT2  | Type 17 T helper cell | -0.450693739 | 0.000E+00 | -0.45498762  | 1.461E-26 |
| CAMTA1   | Type 17 T helper cell | 0.07425779   | 9.230E-02 | 0.065899985  | 1.440E-01 |
| CCR9     | Type 17 T helper cell | -0.159458796 | 2.800E-04 | -0.166150576 | 2.109E-04 |
| CD40     | Type 17 T helper cell | 0.038903083  | 3.783E-01 | 0.04527159   | 3.158E-01 |
| GPR44    | Type 17 T helper cell | -0.406694577 | 6.200E-22 | -0.416857103 | 3.805E-22 |
| IFT80    | Type 17 T helper cell | -0.061688791 | 1.622E-01 | -0.074560243 | 9.821E-02 |
| ASB2     | Type 2 T helper cell  | -0.042890289 | 3.312E-01 | -0.04377559  | 3.321E-01 |
| CSRP2    | Type 2 T helper cell  | 0.288750392  | 2.960E-11 | 0.29322855   | 3.121E-11 |
| DAPK1    | Type 2 T helper cell  | -0.353494785 | 1.355E-16 | -0.369286057 | 2.247E-17 |
| DLC1     | Type 2 T helper cell  | -0.515983705 | 0.000E+00 | -0.525310139 | 2.550E-36 |
| DNAJC12  | Type 2 T helper cell  | 0.05233977   | 2.357E-01 | 0.060214859  | 1.819E-01 |
| DUSP6    | Type 2 T helper cell  | -0.023458142 | 5.952E-01 | -0.028710183 | 5.248E-01 |
| GNAI1    | Type 2 T helper cell  | 0.012305876  | 7.806E-01 | 0.004061993  | 9.283E-01 |
| LAMP3    | Type 2 T helper cell  | -0.237514561 | 4.891E-08 | -0.255428036 | 8.782E-09 |
| NRP2     | Type 2 T helper cell  | 0.173203673  | 7.975E-05 | 0.18259262   | 4.537E-05 |
| OSBPL1A  | Type 2 T helper cell  | -0.138084638 | 1.683E-03 | -0.143121273 | 1.442E-03 |
| PDE4B    | Type 2 T helper cell  | -0.022514327 | 6.101E-01 | -0.007932858 | 8.605E-01 |
| PHLDA1   | Type 2 T helper cell  | 0.115709776  | 8.611E-03 | 0.123416067  | 6.073E-03 |

|         |                      |              |            |              |            |
|---------|----------------------|--------------|------------|--------------|------------|
| PLA2G4A | Type 2 T helper cell | 0.004349868  | 9.216E-01  | 0.002716334  | 9.520E-01  |
| RAB27B  | Type 2 T helper cell | 0.118430527  | 7.133E-03  | 0.11458952   | 1.089E-02  |
| RBMS3   | Type 2 T helper cell | -0.230701225 | 1.195E-07  | -0.235681871 | 1.194E-07  |
| RNF125  | Type 2 T helper cell | -0.189058232 | 1.624E-05  | -0.185977316 | 3.250E-05  |
| TMPRSS3 | Type 2 T helper cell | -0.025916558 | 5.572E-01  | -0.043466222 | 3.355E-01  |
| GATA3   | Type 2 T helper cell | 0.079346377  | 7.200E-02  | 0.097659939  | 3.015E-02  |
| BIRC5   | Type 2 T helper cell | 0.845766627  | 0.000E+00  | 0.847736259  | 2.601E-137 |
| CDC25C  | Type 2 T helper cell | 0.830223677  | 2.648E-132 | 0.832809972  | 3.378E-128 |
| CDC7    | Type 2 T helper cell | 0.711927401  | 0.000E+00  | 0.717179287  | 4.931E-79  |
| CENPF   | Type 2 T helper cell | 0.764495855  | 0.000E+00  | 0.762292427  | 8.019E-95  |
| CXCR6   | Type 2 T helper cell | 0.06540813   | 1.382E-01  | 0.08114484   | 7.184E-02  |
| DHFR    | Type 2 T helper cell | 0.478990588  | 6.770E-31  | 0.47617906   | 2.874E-29  |
| EVI5    | Type 2 T helper cell | -0.022021203 | 6.181E-01  | -0.02906394  | 5.197E-01  |
| GSTA4   | Type 2 T helper cell | -0.178130258 | 4.934E-05  | -0.189249851 | 2.341E-05  |
| HELLS   | Type 2 T helper cell | 0.792895428  | 0.000E+00  | 0.792785641  | 1.199E-107 |
| IL26    | Type 2 T helper cell | 0.031201305  | 4.799E-01  | 0.047708697  | 2.904E-01  |
| LAIR2   | Type 2 T helper cell | 0.01466337   | 7.399E-01  | 0.023773746  | 5.985E-01  |
| CCL3L1  | Regulatory T cell    | 0.214895627  | 8.543E-07  | 0.232560623  | 1.767E-07  |
| CD72    | Regulatory T cell    | 0.148290055  | 7.451E-04  | 0.180198877  | 5.724E-05  |
| CLEC5A  | Regulatory T cell    | 0.009942341  | 8.219E-01  | 0.017714411  | 6.948E-01  |
| FOXP3   | Regulatory T cell    | 0.084380889  | 5.568E-02  | 0.102164358  | 2.329E-02  |
| ITGA4   | Regulatory T cell    | -0.028369441 | 5.206E-01  | -0.019165881 | 6.712E-01  |
| L1CAM   | Regulatory T cell    | 0.18208981   | 3.224E-05  | 0.193167888  | 1.568E-05  |
| LIPA    | Regulatory T cell    | -0.07588524  | 8.536E-02  | -0.070035125 | 1.204E-01  |
| LRP1    | Regulatory T cell    | -0.04588971  | 2.985E-01  | -0.040261555 | 3.724E-01  |
| LRRC42  | Regulatory T cell    | 0.596656644  | 5.608E-51  | 0.590065584  | 1.420E-47  |

|          |                   |              |           |              |           |
|----------|-------------------|--------------|-----------|--------------|-----------|
| MARCO    | Regulatory T cell | -0.119120354 | 6.831E-03 | -0.119923749 | 7.685E-03 |
| MMP12    | Regulatory T cell | 0.463784941  | 0.000E+00 | 0.477194112  | 2.109E-29 |
| MNDA     | Regulatory T cell | -0.07771954  | 7.805E-02 | -0.06977742  | 1.218E-01 |
| MRC1     | Regulatory T cell | -0.117294749 | 7.738E-03 | -0.11220077  | 1.267E-02 |
| MS4A6A   | Regulatory T cell | -0.019936692 | 6.516E-01 | -0.000345792 | 9.939E-01 |
| PELO     | Regulatory T cell | 0.201342935  | 4.315E-06 | 0.20511931   | 4.396E-06 |
| PLEK     | Regulatory T cell | 0.042948272  | 3.306E-01 | 0.06810537   | 1.310E-01 |
| PRSS23   | Regulatory T cell | 0.205488674  | 2.708E-06 | 0.215237108  | 1.410E-06 |
| PTGIR    | Regulatory T cell | -0.22687074  | 2.108E-07 | -0.250328354 | 1.760E-08 |
| ST8SIA4  | Regulatory T cell | 0.07746617   | 7.903E-02 | 0.08255979   | 6.701E-02 |
| STAB1    | Regulatory T cell | 0.046914087  | 2.878E-01 | 0.063670038  | 1.581E-01 |
| ADAM28   | Activated B cell  | 0.025817195  | 5.587E-01 | 0.028777484  | 5.238E-01 |
| CD180    | Activated B cell  | -0.022303038 | 6.135E-01 | -0.002882085 | 9.491E-01 |
| CD79B    | Activated B cell  | -0.158833932 | 3.009E-04 | -0.172757729 | 1.157E-04 |
| BLK      | Activated B cell  | -0.232822331 | 9.074E-08 | -0.254597931 | 9.844E-09 |
| CD19     | Activated B cell  | -0.107061986 | 1.507E-02 | -0.118930955 | 8.208E-03 |
| MS4A1    | Activated B cell  | -0.188506422 | 1.720E-05 | -0.207284836 | 3.462E-06 |
| TNFRSF17 | Activated B cell  | -0.139554447 | 1.499E-03 | -0.138921287 | 1.990E-03 |
| GNG7     | Activated B cell  | -0.525862264 | 0.000E+00 | -0.542454019 | 4.598E-39 |
| MICAL3   | Activated B cell  | 0.340020152  | 2.102E-15 | 0.344177052  | 3.717E-15 |
| SPIB     | Activated B cell  | -0.166979665 | 1.407E-04 | -0.181184545 | 5.204E-05 |
| HLA-DOB  | Activated B cell  | -0.226148278 | 2.137E-07 | -0.240141681 | 6.752E-08 |
| PNOC     | Activated B cell  | -0.07159481  | 1.046E-01 | -0.069458687 | 1.235E-01 |
| FCRL2    | Activated B cell  | -0.097293881 | 2.726E-02 | -0.094913349 | 3.513E-02 |
| BACH2    | Activated B cell  | 0.157317932  | 3.387E-04 | 0.178223318  | 6.919E-05 |
| CR2      | Activated B cell  | -0.174107649 | 7.130E-05 | -0.169582203 | 1.548E-04 |

|          |                  |              |           |              |           |
|----------|------------------|--------------|-----------|--------------|-----------|
| TCL1A    | Activated B cell | -0.059583824 | 1.770E-01 | -0.057994048 | 1.986E-01 |
| AKNA     | Activated B cell | -0.135474099 | 2.078E-03 | -0.1423172   | 1.535E-03 |
| ARHGAP25 | Activated B cell | -0.121882833 | 5.639E-03 | -0.125956658 | 5.098E-03 |
| CCL21    | Activated B cell | 0.022993834  | 6.025E-01 | 0.047277888  | 2.948E-01 |
| CD27     | Activated B cell | -0.132012479 | 2.703E-03 | -0.139294974 | 1.934E-03 |
| CD38     | Activated B cell | -0.001356904 | 9.755E-01 | 0.013868566  | 7.587E-01 |
| CLEC17A  | Activated B cell | -0.127927261 | 3.637E-03 | -0.142694503 | 1.490E-03 |
| CLEC9A   | Activated B cell | -0.292272255 | 1.334E-11 | -0.299592858 | 1.108E-11 |
| CLECL1   | Activated B cell | -0.163483418 | 1.945E-04 | -0.165989295 | 2.140E-04 |
| CD22     | Immature B cell  | -0.257255373 | 3.589E-09 | -0.284624201 | 1.217E-10 |
| CYBB     | Immature B cell  | 0.027407966  | 5.347E-01 | 0.054250235  | 2.292E-01 |
| FAM129C  | Immature B cell  | -0.189505955 | 1.495E-05 | -0.202589544 | 5.791E-06 |
| FCRL1    | Immature B cell  | -0.232354541 | 9.644E-08 | -0.256888797 | 7.175E-09 |
| FCRL3    | Immature B cell  | -0.083935916 | 5.697E-02 | -0.081808256 | 6.954E-02 |
| FCRL5    | Immature B cell  | 0.016923478  | 7.015E-01 | 0.026558557  | 5.563E-01 |
| FCRLA    | Immature B cell  | -0.134366094 | 2.245E-03 | -0.143490074 | 1.401E-03 |
| HDAC9    | Immature B cell  | 0.095770975  | 2.981E-02 | 0.087266821  | 5.282E-02 |
| HLA-DQA1 | Immature B cell  | -0.131097832 | 2.895E-03 | -0.137409253 | 2.230E-03 |
| HVCN1    | Immature B cell  | -0.051913152 | 2.396E-01 | -0.038366446 | 3.953E-01 |
| KIAA0226 | Immature B cell  | 0.278363158  | 1.540E-10 | 0.277627866  | 3.555E-10 |
| NCF1     | Immature B cell  | 0.0196701    | 6.561E-01 | 0.037111231  | 4.110E-01 |
| NCF1B    | Immature B cell  | -0.027711062 | 5.302E-01 | -0.018872756 | 6.759E-01 |
| P2RY10   | Immature B cell  | 0.00014575   | 9.974E-01 | 0.018400388  | 6.836E-01 |
| SP100    | Immature B cell  | 0.142440922  | 1.190E-03 | 0.155461927  | 5.319E-04 |
| TXNIP    | Immature B cell  | -0.337705238 | 4.403E-15 | -0.340165129 | 8.067E-15 |
| STAP1    | Immature B cell  | -0.199061632 | 5.553E-06 | -0.222894142 | 5.747E-07 |

|        |                     |              |           |              |            |
|--------|---------------------|--------------|-----------|--------------|------------|
| TAGAP  | Immature B cell     | -0.047100776 | 2.859E-01 | -0.04431254  | 3.262E-01  |
| ZCCHC2 | Immature B cell     | 0.037999022  | 3.895E-01 | 0.041974241  | 3.524E-01  |
| AICDA  | Memory B cell       | 0.044867296  | 3.095E-01 | 0.069153389  | 1.252E-01  |
| CCNA2  | Memory B cell       | 0.90103202   | 0.000E+00 | 0.901976588  | 3.289E-181 |
| CDKN3  | Memory B cell       | 0.824336505  | 0.000E+00 | 0.828306212  | 1.267E-125 |
| CLCN5  | Memory B cell       | -0.038332603 | 3.852E-01 | -0.036518679 | 4.185E-01  |
| ENPP1  | Memory B cell       | 0.325511551  | 4.798E-14 | 0.334407535  | 2.405E-14  |
| FCER1A | Memory B cell       | -0.489529764 | 2.167E-32 | -0.498295422 | 2.662E-32  |
| FCRL4  | Memory B cell       | -0.042127164 | 3.400E-01 | -0.050114878 | 2.667E-01  |
| MYC    | Memory B cell       | 0.264396755  | 1.275E-09 | 0.263261722  | 2.929E-09  |
| RUNX2  | Memory B cell       | 0.08349383   | 5.829E-02 | 0.0922227    | 4.067E-02  |
| SORL1  | Memory B cell       | -0.095894674 | 2.959E-02 | -0.098559457 | 2.866E-02  |
| SOX5   | Memory B cell       | -0.091841783 | 3.720E-02 | -0.102762231 | 2.249E-02  |
| STAT5A | Memory B cell       | -0.033432638 | 4.490E-01 | -0.021001846 | 6.418E-01  |
| STAT5B | Memory B cell       | -0.032153265 | 4.666E-01 | -0.0356416   | 4.298E-01  |
| TLR9   | Memory B cell       | 0.013252063  | 7.642E-01 | 0.030098974  | 5.049E-01  |
| AKT3   | Natural killer cell | 0.104256747  | 1.795E-02 | 0.115518595  | 1.026E-02  |
| AXL    | Natural killer cell | 0.013695198  | 7.564E-01 | 0.016054892  | 7.221E-01  |
| BST2   | Natural killer cell | 0.043539881  | 3.239E-01 | 0.037381693  | 4.076E-01  |
| CDH2   | Natural killer cell | 0.207615354  | 2.125E-06 | 0.21684483   | 1.171E-06  |
| CRTAM  | Natural killer cell | -0.010458835 | 8.128E-01 | 0.007866952  | 8.617E-01  |
| CSF2RA | Natural killer cell | 0.001450381  | 9.738E-01 | 0.018553664  | 6.811E-01  |
| CTSZ   | Natural killer cell | -0.070042513 | 1.124E-01 | -0.057811299 | 2.000E-01  |
| CXCL1  | Natural killer cell | 0.090407669  | 4.031E-02 | 0.090274336  | 4.513E-02  |
| CYTH1  | Natural killer cell | -0.039284149 | 3.736E-01 | -0.048444911 | 2.830E-01  |
| DAXX   | Natural killer cell | 0.188750568  | 1.677E-05 | 0.182768894  | 4.460E-05  |

|          |                                |              |           |              |           |
|----------|--------------------------------|--------------|-----------|--------------|-----------|
| DGKH     | Natural killer cell            | 0.25050169   | 9.294E-09 | 0.259345467  | 5.094E-09 |
| DLL4     | Natural killer cell            | -0.060822857 | 1.681E-01 | -0.084197908 | 6.175E-02 |
| DPYD     | Natural killer cell            | -0.037021119 | 4.017E-01 | -0.02886201  | 5.226E-01 |
| ERBB3    | Natural killer cell            | -0.213911143 | 1.021E-06 | -0.233196315 | 1.632E-07 |
| F11R     | Natural killer cell            | -0.031349709 | 4.776E-01 | -0.050947754 | 2.589E-01 |
| FAM27A   | Natural killer cell            | -0.156829197 | 3.536E-04 | -0.162272819 | 2.970E-04 |
| FAM49A   | Natural killer cell            | -0.04301961  | 3.298E-01 | -0.050528541 | 2.628E-01 |
| FASLG    | Natural killer cell            | 0.141849926  | 1.248E-03 | 0.161756809  | 3.107E-04 |
| FCGR1A   | Natural killer cell            | 0.120688898  | 6.129E-03 | 0.150157068  | 8.242E-04 |
| FN1      | Natural killer cell            | 0.243779898  | 2.333E-08 | 0.265397525  | 2.157E-09 |
| FSTL1    | Natural killer cell            | 0.100042258  | 2.321E-02 | 0.121829187  | 6.763E-03 |
| FUCA1    | Natural killer cell            | -0.283327257 | 7.063E-11 | -0.296337101 | 1.888E-11 |
| GBP3     | Natural killer cell            | 0.120078752  | 6.394E-03 | 0.125668969  | 5.201E-03 |
| GLS2     | Natural killer cell            | -0.343338256 | 1.363E-15 | -0.379343066 | 2.551E-18 |
| GRB2     | Natural killer cell            | 0.33753691   | 4.557E-15 | 0.33633739   | 1.672E-14 |
| LST1     | Natural killer cell            | -0.18615835  | 2.195E-05 | -0.189393987 | 2.307E-05 |
| BCL2     | Natural killer cell            | -0.100563585 | 2.247E-02 | -0.093005852 | 3.899E-02 |
| CDC5L    | Natural killer cell            | 0.38027369   | 3.648E-19 | 0.376205474  | 5.070E-18 |
| FGF18    | Natural killer cell            | -0.265608412 | 9.166E-10 | -0.276001083 | 4.542E-10 |
| FUT5     | Natural killer cell            | 0.12804276   | 3.606E-03 | 0.140456352  | 1.771E-03 |
| FZR1     | Natural killer cell            | 0.171397747  | 9.479E-05 | 0.16362625   | 2.638E-04 |
| IGFBP5   | Natural killer cell            | 0.080440598  | 6.815E-02 | 0.084811468  | 5.987E-02 |
| KANK2    | Natural killer cell            | -0.258306984 | 3.088E-09 | -0.273815887 | 6.297E-10 |
| LDB3     | Natural killer cell            | -0.325576219 | 3.510E-14 | -0.335904198 | 1.815E-14 |
| ABAT     | CD56bright natural killer cell | -0.28008448  | 1.177E-10 | -0.296459653 | 1.851E-11 |
| C11orf75 | CD56bright natural killer cell | -0.109195934 | 1.319E-02 | -0.11405289  | 1.127E-02 |

|         |                                |              |           |              |           |
|---------|--------------------------------|--------------|-----------|--------------|-----------|
| C5orf15 | CD56bright natural killer cell | 0.232354851  | 9.643E-08 | 0.233471422  | 1.577E-07 |
| CDHR1   | CD56bright natural killer cell | -0.145045489 | 9.631E-04 | -0.145397682 | 1.206E-03 |
| DCAF12  | CD56bright natural killer cell | 0.137174779  | 1.807E-03 | 0.137033791  | 2.294E-03 |
| DYNLL1  | CD56bright natural killer cell | 0.451109825  | 3.494E-27 | 0.459814556  | 3.671E-27 |
| GPR137B | CD56bright natural killer cell | 0.226389388  | 2.239E-07 | 0.240424895  | 6.509E-08 |
| HCP5    | CD56bright natural killer cell | 0.136080555  | 1.984E-03 | 0.140691643  | 1.739E-03 |
| HDGFRP2 | CD56bright natural killer cell | 0.182969124  | 2.948E-05 | 0.173392848  | 1.090E-04 |
| KRT86   | CD56bright natural killer cell | 0.121586466  | 5.731E-03 | 0.118117831  | 8.660E-03 |
| MLST8   | CD56bright natural killer cell | 0.079768826  | 7.049E-02 | 0.068236434  | 1.303E-01 |
| ELMOD3  | CD56bright natural killer cell | -0.113591882 | 9.915E-03 | -0.12131669  | 7.001E-03 |
| ENTPD5  | CD56bright natural killer cell | 0.226288229  | 2.100E-07 | 0.215542668  | 1.361E-06 |
| FAM119A | CD56bright natural killer cell | 0.235034176  | 6.792E-08 | 0.242942378  | 4.693E-08 |
| FAM179A | CD56bright natural killer cell | -0.234875995 | 6.935E-08 | -0.253671289 | 1.118E-08 |
| CLIC2   | CD56bright natural killer cell | -0.16434207  | 1.797E-04 | -0.160633356 | 3.425E-04 |
| COX7A2L | CD56bright natural killer cell | 0.381210249  | 2.938E-19 | 0.385476852  | 6.517E-19 |
| CREB3L4 | CD56bright natural killer cell | -0.104902649 | 1.725E-02 | -0.118854083 | 8.250E-03 |
| CSF1    | CD56bright natural killer cell | 0.050972148  | 2.481E-01 | 0.063473498  | 1.594E-01 |
| CSNK2A2 | CD56bright natural killer cell | 0.181401674  | 3.561E-05 | 0.178301714  | 6.867E-05 |
| CSTA    | CD56bright natural killer cell | -0.001616512 | 9.708E-01 | 0.005717701  | 8.992E-01 |
| CSTB    | CD56bright natural killer cell | 0.082541228  | 6.125E-02 | 0.081131375  | 7.189E-02 |
| CTPS    | CD56bright natural killer cell | 0.579891654  | 1.324E-47 | 0.571083278  | 5.154E-44 |
| CTSD    | CD56bright natural killer cell | -0.290996378 | 2.054E-11 | -0.299119637 | 1.197E-11 |
| FST     | CD56bright natural killer cell | 0.094513049  | 3.200E-02 | 0.090860801  | 4.375E-02 |
| GATA2   | CD56bright natural killer cell | -0.101616207 | 2.109E-02 | -0.107995162 | 1.645E-02 |
| GMPR    | CD56bright natural killer cell | -0.311772572 | 4.511E-13 | -0.310050743 | 1.908E-12 |
| HDC     | CD56bright natural killer cell | -0.251525238 | 7.146E-09 | -0.269054442 | 1.270E-09 |

|         |                                 |              |           |              |           |
|---------|---------------------------------|--------------|-----------|--------------|-----------|
| HEY1    | CD56bright natural killer cell  | -0.097464623 | 2.702E-02 | -0.101328311 | 2.445E-02 |
| HOXA1   | CD56bright natural killer cell  | 0.363979026  | 1.409E-17 | 0.378470219  | 3.090E-18 |
| HS2ST1  | CD56bright natural killer cell  | 0.334520796  | 8.359E-15 | 0.334145456  | 2.526E-14 |
| HS3ST1  | CD56bright natural killer cell  | 0.078742469  | 7.420E-02 | 0.072733178  | 1.067E-01 |
| BCL11B  | CD56bright natural killer cell  | -0.057636397 | 1.916E-01 | -0.049505403 | 2.726E-01 |
| CDH3    | CD56bright natural killer cell  | 0.289872375  | 2.467E-11 | 0.287099066  | 8.265E-11 |
| MYL6B   | CD56bright natural killer cell  | 0.482696213  | 2.046E-31 | 0.495987323  | 5.652E-32 |
| NAA16   | CD56bright natural killer cell  | -0.078768253 | 7.411E-02 | -0.07673145  | 8.877E-02 |
| CYP27B1 | CD56bright natural killer cell  | 0.165243492  | 1.686E-04 | 0.158590775  | 4.082E-04 |
| EIF3M   | CD56bright natural killer cell  | 0.379401951  | 4.459E-19 | 0.397585758  | 4.045E-20 |
| CYP27A1 | CD56dim natural killer cell     | -0.292280539 | 1.664E-11 | -0.295964781 | 2.006E-11 |
| DDX55   | CD56dim natural killer cell     | 0.431027988  | 0.000E+00 | 0.431321569  | 9.351E-24 |
| DYRK2   | CD56dim natural killer cell     | 0.3024959    | 2.333E-12 | 0.309488403  | 2.101E-12 |
| RPL37A  | CD56dim natural killer cell     | -0.090774902 | 3.947E-02 | -0.09297316  | 3.906E-02 |
| NOTCH3  | CD56dim natural killer cell     | 0.211105     | 1.419E-06 | 0.202022593  | 6.157E-06 |
| AKR7A3  | CD56dim natural killer cell     | 0.036047347  | 4.143E-01 | 0.019956399  | 6.585E-01 |
| GPRC5C  | CD56dim natural killer cell     | -0.50748297  | 4.641E-35 | -0.524798161 | 3.063E-36 |
| GRIN1   | CD56dim natural killer cell     | 0.102515236  | 1.997E-02 | 0.100748037  | 2.529E-02 |
| HLA-E   | CD56dim natural killer cell     | -0.096091203 | 2.926E-02 | -0.096457776 | 3.225E-02 |
| PORCN   | CD56dim natural killer cell     | 0.151366524  | 5.753E-04 | 0.148777219  | 9.215E-04 |
| PSMC4   | CD56dim natural killer cell     | 0.544236211  | 0.000E+00 | 0.542541233  | 4.448E-39 |
| UPP1    | CD56dim natural killer cell     | 0.210489847  | 1.525E-06 | 0.215399037  | 1.384E-06 |
| IL21R   | CD56dim natural killer cell     | 0.100393322  | 2.273E-02 | 0.134484637  | 2.771E-03 |
| CCR2    | Myeloid derived suppressor cell | -0.112621359 | 1.057E-02 | -0.111331041 | 1.338E-02 |
| CD14    | Myeloid derived suppressor cell | 0.093614513  | 3.371E-02 | 0.125506012  | 5.260E-03 |
| CD2     | Myeloid derived suppressor cell | -0.025663145 | 5.612E-01 | -0.01582159  | 7.260E-01 |



|        |                                 |              |           |              |           |
|--------|---------------------------------|--------------|-----------|--------------|-----------|
| CD86   | Myeloid derived suppressor cell | 0.091801823  | 3.731E-02 | 0.116321259  | 9.739E-03 |
| CXCR4  | Myeloid derived suppressor cell | -0.037994892 | 3.894E-01 | -0.04236023  | 3.479E-01 |
| FCGR2A | Myeloid derived suppressor cell | 0.014338992  | 7.455E-01 | 0.035936333  | 4.259E-01 |
| FCGR2B | Myeloid derived suppressor cell | 0.027740581  | 5.298E-01 | 0.05019403   | 2.660E-01 |
| FCGR3A | Myeloid derived suppressor cell | 0.22436699   | 2.880E-07 | 0.254213968  | 1.038E-08 |
| FERMT3 | Myeloid derived suppressor cell | -0.000645814 | 9.883E-01 | 0.007142442  | 8.743E-01 |
| GPSM3  | Myeloid derived suppressor cell | -0.278793203 | 1.441E-10 | -0.284506721 | 1.239E-10 |
| IL18BP | Myeloid derived suppressor cell | 0.125892135  | 4.241E-03 | 0.151091497  | 7.638E-04 |
| IL4R   | Myeloid derived suppressor cell | 0.028529598  | 5.183E-01 | 0.028262479  | 5.313E-01 |
| ITGAL  | Myeloid derived suppressor cell | -0.086275283 | 5.040E-02 | -0.087802861 | 5.137E-02 |
| ITGAM  | Myeloid derived suppressor cell | -0.03785661  | 3.911E-01 | -0.022881909 | 6.123E-01 |
| PARVG  | Myeloid derived suppressor cell | -0.14473193  | 9.882E-04 | -0.160832358 | 3.366E-04 |
| PSAP   | Myeloid derived suppressor cell | 0.071347145  | 1.058E-01 | 0.078746725  | 8.068E-02 |
| PTGER2 | Myeloid derived suppressor cell | -0.099197103 | 2.441E-02 | -0.092269274 | 4.057E-02 |
| PTGES2 | Myeloid derived suppressor cell | 0.303138237  | 2.086E-12 | 0.30026518   | 9.913E-12 |
| S100A8 | Myeloid derived suppressor cell | 0.216216869  | 7.765E-07 | 0.244871901  | 3.644E-08 |
| S100A9 | Myeloid derived suppressor cell | 0.155944768  | 3.880E-04 | 0.177919351  | 7.122E-05 |
| BTN2A2 | Natural killer T cell           | -0.066797188 | 1.300E-01 | -0.062204421 | 1.679E-01 |
| CD101  | Natural killer T cell           | -0.044779588 | 3.104E-01 | -0.04328937  | 3.375E-01 |
| CD109  | Natural killer T cell           | 0.444887384  | 0.000E+00 | 0.462199774  | 1.840E-27 |
| CNPY3  | Natural killer T cell           | 0.08828503   | 4.525E-02 | 0.075781012  | 9.281E-02 |
| CNPY4  | Natural killer T cell           | 0.186644973  | 2.087E-05 | 0.183186399  | 4.281E-05 |
| CREB1  | Natural killer T cell           | 0.312384856  | 5.336E-13 | 0.309086779  | 2.251E-12 |
| CRTC2  | Natural killer T cell           | 0.032754407  | 4.583E-01 | 0.010439557  | 8.171E-01 |
| CRTC3  | Natural killer T cell           | 0.057739712  | 1.907E-01 | 0.065442049  | 1.468E-01 |
| CSF2   | Natural killer T cell           | -0.141532057 | 1.281E-03 | -0.145136354 | 1.231E-03 |

|          |                       |              |           |              |           |
|----------|-----------------------|--------------|-----------|--------------|-----------|
| KLRC1    | Natural killer T cell | 0.234030736  | 7.748E-08 | 0.253466249  | 1.150E-08 |
| FUT4     | Natural killer T cell | 0.21199417   | 1.279E-06 | 0.210108454  | 2.527E-06 |
| ICAM2    | Natural killer T cell | -0.183297742 | 2.851E-05 | -0.191419667 | 1.877E-05 |
| IL32     | Natural killer T cell | 0.107097631  | 1.507E-02 | 0.122494853  | 6.466E-03 |
| LAMP2    | Natural killer T cell | 0.145607573  | 9.197E-04 | 0.145674335  | 1.180E-03 |
| LILRB5   | Natural killer T cell | -0.014130602 | 7.490E-01 | -0.005815853 | 8.975E-01 |
| KLRG1    | Natural killer T cell | -0.137022349 | 1.844E-03 | -0.132845888 | 3.124E-03 |
| HSPA4    | Natural killer T cell | 0.410542208  | 0.000E+00 | 0.414923714  | 6.162E-22 |
| HSPB6    | Natural killer T cell | -0.325016143 | 5.269E-14 | -0.328211515 | 7.598E-14 |
| ISM2     | Natural killer T cell | 0.373807108  | 1.594E-18 | 0.391077619  | 1.828E-19 |
| ITIH2    | Natural killer T cell | -0.249480133 | 9.533E-09 | -0.25956005  | 4.943E-09 |
| KDM4C    | Natural killer T cell | -0.049534594 | 2.617E-01 | -0.046505074 | 3.028E-01 |
| KIR2DS4  | Natural killer T cell | 0.057808014  | 1.903E-01 | 0.077408596  | 8.599E-02 |
| KIRREL3  | Natural killer T cell | -0.025465848 | 5.642E-01 | -0.016188427 | 7.199E-01 |
| SDCBP    | Natural killer T cell | 0.171960979  | 8.983E-05 | 0.193296917  | 1.547E-05 |
| NFATC2IP | Natural killer T cell | 0.042813944  | 3.321E-01 | 0.036579977  | 4.177E-01 |
| MICB     | Natural killer T cell | 0.353253275  | 1.437E-16 | 0.363955815  | 6.905E-17 |
| KIR2DL1  | Natural killer T cell | 0.030925687  | 4.838E-01 | 0.033483627  | 4.582E-01 |
| KIR2DL3  | Natural killer T cell | 0.17872658   | 4.523E-05 | 0.194823318  | 1.321E-05 |
| KIR3DL1  | Natural killer T cell | 0.070232882  | 1.114E-01 | 0.073030823  | 1.053E-01 |
| KIR3DL2  | Natural killer T cell | 0.14799951   | 7.543E-04 | 0.176973846  | 7.792E-05 |
| NCR1     | Natural killer T cell | 0.175786006  | 6.051E-05 | 0.190595069  | 2.042E-05 |
| FOSL1    | Natural killer T cell | 0.384626792  | 0.000E+00 | 0.39722683   | 4.399E-20 |
| TSLP     | Natural killer T cell | -0.328671874 | 1.944E-14 | -0.332684102 | 3.321E-14 |
| SLC7A7   | Natural killer T cell | 0.124425325  | 4.711E-03 | 0.152424967  | 6.846E-04 |
| SPP1     | Natural killer T cell | 0.259229149  | 2.359E-09 | 0.261977579  | 3.515E-09 |

|         |                          |              |           |              |           |
|---------|--------------------------|--------------|-----------|--------------|-----------|
| TREM2   | Natural killer T cell    | -0.147490233 | 7.963E-04 | -0.15170126  | 7.266E-04 |
| UBASH3A | Natural killer T cell    | -0.038725925 | 3.803E-01 | -0.025378034 | 5.740E-01 |
| YBX2    | Natural killer T cell    | 0.293846371  | 1.025E-11 | 0.292483943  | 3.518E-11 |
| CCDC88A | Natural killer T cell    | 0.370462981  | 0.000E+00 | 0.382178616  | 1.362E-18 |
| CLEC1A  | Natural killer T cell    | -0.19033677  | 1.420E-05 | -0.206698097 | 3.695E-06 |
| THBD    | Natural killer T cell    | -0.169219545 | 1.140E-04 | -0.170998392 | 1.360E-04 |
| PDPN    | Natural killer T cell    | 0.118607814  | 7.076E-03 | 0.148133789  | 9.704E-04 |
| VCAM1   | Natural killer T cell    | 0.13403391   | 2.320E-03 | 0.169945829  | 1.498E-04 |
| EMR1    | Natural killer T cell    | 0.038248968  | 3.864E-01 | 0.053130985  | 2.390E-01 |
| ABCD1   | Activated dendritic cell | 0.22337714   | 3.255E-07 | 0.225749509  | 4.078E-07 |
| C1QC    | Activated dendritic cell | 0.145900077  | 9.079E-04 | 0.171769018  | 1.267E-04 |
| CAPG    | Activated dendritic cell | 0.062506844  | 1.566E-01 | 0.068427607  | 1.292E-01 |
| CCL3L3  | Activated dendritic cell | 0.054107632  | 2.203E-01 | 0.062790536  | 1.639E-01 |
| CD207   | Activated dendritic cell | -0.439022445 | 1.121E-25 | -0.447013034 | 1.364E-25 |
| CD302   | Activated dendritic cell | -0.558191632 | 0.000E+00 | -0.563236799 | 1.309E-42 |
| ATP5B   | Activated dendritic cell | 0.507088286  | 5.334E-35 | 0.508831978  | 7.951E-34 |
| ATP5L   | Activated dendritic cell | 0.141981092  | 1.235E-03 | 0.152235683  | 6.954E-04 |
| ATP6V1A | Activated dendritic cell | 0.274869527  | 2.221E-10 | 0.271860844  | 8.413E-10 |
| BCL2L1  | Activated dendritic cell | 0.185963578  | 2.239E-05 | 0.171351117  | 1.317E-04 |
| C1QB    | Activated dendritic cell | 0.11103094   | 1.172E-02 | 0.13542014   | 2.586E-03 |
| SNURF   | Activated dendritic cell | -0.044971278 | 3.084E-01 | -0.042454203 | 3.469E-01 |
| SPCS3   | Activated dendritic cell | 0.116022888  | 8.432E-03 | 0.134172465  | 2.835E-03 |
| CCNA1   | Activated dendritic cell | 0.007743376  | 8.608E-01 | 0.018528811  | 6.815E-01 |
| CEACAM8 | Activated dendritic cell | -0.305617683 | 1.351E-12 | -0.311943417 | 1.378E-12 |
| NOS2    | Activated dendritic cell | 0.045637343  | 3.013E-01 | 0.030862798  | 4.942E-01 |
| SRA1    | Activated dendritic cell | 0.030420128  | 4.909E-01 | 0.043611148  | 3.339E-01 |

|          |                             |              |           |              |           |
|----------|-----------------------------|--------------|-----------|--------------|-----------|
| TNFRSF6B | Activated dendritic cell    | 0.101861449  | 2.081E-02 | 0.111639033  | 1.313E-02 |
| TREM1    | Activated dendritic cell    | -0.057797038 | 1.904E-01 | -0.058742565 | 1.929E-01 |
| TREML1   | Activated dendritic cell    | -0.265854803 | 8.833E-10 | -0.277823514 | 3.451E-10 |
| RHOA     | Activated dendritic cell    | 0.033292862  | 4.508E-01 | 0.038409438  | 3.948E-01 |
| SLC25A37 | Activated dendritic cell    | 0.044130304  | 3.175E-01 | 0.03873013   | 3.908E-01 |
| TNFSF14  | Activated dendritic cell    | -0.136811687 | 1.859E-03 | -0.14786447  | 9.916E-04 |
| TREML4   | Activated dendritic cell    | 0.11556865   | 8.662E-03 | 0.119763434  | 7.767E-03 |
| VNN2     | Activated dendritic cell    | 0.002885826  | 9.479E-01 | 0.012271903  | 7.858E-01 |
| XPO6     | Activated dendritic cell    | 0.353855046  | 1.230E-16 | 0.351792064  | 8.282E-16 |
| CLEC4C   | Activated dendritic cell    | 0.069414945  | 1.156E-01 | 0.08310602   | 6.522E-02 |
| TNFAIP2  | Activated dendritic cell    | 0.212697529  | 1.178E-06 | 0.223489741  | 5.352E-07 |
| UBD      | Activated dendritic cell    | 0.19719948   | 6.809E-06 | 0.231773533  | 1.949E-07 |
| ACTR3    | Activated dendritic cell    | 0.604126411  | 0.000E+00 | 0.625695836  | 6.241E-55 |
| RAB1A    | Activated dendritic cell    | 0.365868712  | 9.320E-18 | 0.374197793  | 7.838E-18 |
| SLA      | Activated dendritic cell    | -0.024637932 | 5.768E-01 | -0.011795819 | 7.939E-01 |
| HLA-DQA2 | Activated dendritic cell    | -0.114892166 | 9.064E-03 | -0.114491542 | 1.096E-02 |
| SIGLEC5  | Activated dendritic cell    | 0.031332841  | 4.780E-01 | 0.039900888  | 3.767E-01 |
| SLAMF9   | Activated dendritic cell    | 0.293805265  | 1.032E-11 | 0.289541887  | 5.622E-11 |
| CBX6     | Plasmacytoid dendritic cell | 0.083010983  | 5.979E-02 | 0.076123026  | 9.134E-02 |
| DAB2     | Plasmacytoid dendritic cell | -0.06391189  | 1.475E-01 | -0.054100351 | 2.305E-01 |
| DDX17    | Plasmacytoid dendritic cell | -0.205977937 | 2.433E-06 | -0.213687759 | 1.684E-06 |
| HIGD1A   | Plasmacytoid dendritic cell | 0.174059509  | 7.163E-05 | 0.175015062  | 9.372E-05 |
| IDH3A    | Plasmacytoid dendritic cell | 0.135520662  | 2.071E-03 | 0.138570045  | 2.044E-03 |
| IL3RA    | Plasmacytoid dendritic cell | -0.067056885 | 1.285E-01 | -0.051453874 | 2.542E-01 |
| MAGED1   | Plasmacytoid dendritic cell | 0.065437737  | 1.380E-01 | 0.060314117  | 1.812E-01 |
| NUCB2    | Plasmacytoid dendritic cell | -0.100864658 | 2.210E-02 | -0.090139268 | 4.546E-02 |

|         |                             |              |           |              |           |
|---------|-----------------------------|--------------|-----------|--------------|-----------|
| OFD1    | Plasmacytoid dendritic cell | -0.139490254 | 1.520E-03 | -0.145468605 | 1.200E-03 |
| OGT     | Plasmacytoid dendritic cell | -0.131658782 | 2.757E-03 | -0.137261715 | 2.255E-03 |
| PDIA4   | Plasmacytoid dendritic cell | 0.333332308  | 1.058E-14 | 0.332666675  | 3.332E-14 |
| SERTAD2 | Plasmacytoid dendritic cell | 0.219056308  | 5.519E-07 | 0.216177614  | 1.265E-06 |
| SIRPA   | Plasmacytoid dendritic cell | 0.089514897  | 4.233E-02 | 0.110767203  | 1.386E-02 |
| TMED2   | Plasmacytoid dendritic cell | 0.419545655  | 0.000E+00 | 0.434057768  | 4.545E-24 |
| ENG     | Plasmacytoid dendritic cell | -0.227372561 | 1.979E-07 | -0.223619509 | 5.270E-07 |
| FCAR    | Plasmacytoid dendritic cell | 0.152295046  | 5.244E-04 | 0.161514413  | 3.173E-04 |
| IGF1    | Plasmacytoid dendritic cell | -0.05670409  | 1.988E-01 | -0.038330752 | 3.958E-01 |
| ITGA2B  | Plasmacytoid dendritic cell | 0.139469499  | 1.509E-03 | 0.119432866  | 7.940E-03 |
| GABARAP | Plasmacytoid dendritic cell | -0.290952156 | 1.663E-11 | -0.277519695 | 3.614E-10 |
| GPX1    | Plasmacytoid dendritic cell | -0.029960211 | 4.974E-01 | -0.04151163  | 3.577E-01 |
| KRT23   | Plasmacytoid dendritic cell | 0.101187096  | 2.164E-02 | 0.094142919  | 3.665E-02 |
| PROK2   | Plasmacytoid dendritic cell | 0.047157673  | 2.854E-01 | 0.054207404  | 2.296E-01 |
| RALB    | Plasmacytoid dendritic cell | 0.346746492  | 5.382E-16 | 0.357005211  | 2.893E-16 |
| RETNLB  | Plasmacytoid dendritic cell | 0.274087507  | 2.508E-10 | 0.27919283   | 2.804E-10 |
| RNF141  | Plasmacytoid dendritic cell | -0.07916421  | 7.267E-02 | -0.090079332 | 4.560E-02 |
| SEC14L1 | Plasmacytoid dendritic cell | 0.153679282  | 4.655E-04 | 0.15414209   | 5.939E-04 |
| SEPX1   | Plasmacytoid dendritic cell | 0.135621782  | 2.055E-03 | 0.137390722  | 2.233E-03 |
| EMP3    | Plasmacytoid dendritic cell | 0.078009634  | 7.695E-02 | 0.104472852  | 2.033E-02 |
| CD300LF | Plasmacytoid dendritic cell | -0.142059279 | 1.240E-03 | -0.150467422 | 8.036E-04 |
| ABTB1   | Plasmacytoid dendritic cell | -0.404027663 | 0.000E+00 | -0.408863486 | 2.735E-21 |
| KLHL21  | Plasmacytoid dendritic cell | -0.127661952 | 3.730E-03 | -0.121537096 | 6.898E-03 |
| PHRF1   | Plasmacytoid dendritic cell | 0.101269184  | 2.153E-02 | 0.100620151  | 2.547E-02 |
| ACADM   | Immature dendritic cell     | 0.074014968  | 9.337E-02 | 0.064712042  | 1.514E-01 |
| AHCYL1  | Immature dendritic cell     | 0.039931808  | 3.657E-01 | 0.041976457  | 3.523E-01 |

|          |                         |              |           |              |           |
|----------|-------------------------|--------------|-----------|--------------|-----------|
| ALDH1A2  | Immature dendritic cell | -0.034731867 | 4.316E-01 | -0.023484989 | 6.029E-01 |
| ALDH3A2  | Immature dendritic cell | -0.297157668 | 5.849E-12 | -0.303259531 | 6.027E-12 |
| ALDH9A1  | Immature dendritic cell | -0.119073357 | 6.825E-03 | -0.131960696 | 3.331E-03 |
| ALOX15   | Immature dendritic cell | -0.206777833 | 2.219E-06 | -0.196486212 | 1.110E-05 |
| AMT      | Immature dendritic cell | -0.316083858 | 2.746E-13 | -0.323046529 | 1.943E-13 |
| ARL1     | Immature dendritic cell | 0.234533096  | 7.934E-08 | 0.241826225  | 5.428E-08 |
| ATIC     | Immature dendritic cell | 0.457174733  | 5.814E-28 | 0.455721495  | 1.186E-26 |
| ATP5A1   | Immature dendritic cell | 0.03829342   | 3.857E-01 | 0.044292328  | 3.264E-01 |
| CAPZA1   | Immature dendritic cell | 0.514022629  | 0.000E+00 | 0.526936944  | 1.422E-36 |
| LILRA5   | Immature dendritic cell | 0.205394143  | 2.737E-06 | 0.230075139  | 2.405E-07 |
| RDX      | Immature dendritic cell | 0.372725448  | 2.034E-18 | 0.375199812  | 6.309E-18 |
| RRAGD    | Immature dendritic cell | 0.198774174  | 5.731E-06 | 0.19952863   | 8.045E-06 |
| TACSTD2  | Immature dendritic cell | 0.036698168  | 4.058E-01 | 0.025827946  | 5.672E-01 |
| INPP5F   | Immature dendritic cell | 0.138915912  | 1.577E-03 | 0.141318559  | 1.657E-03 |
| RAB38    | Immature dendritic cell | 0.005815403  | 8.953E-01 | 0.000261251  | 9.954E-01 |
| PLAU     | Immature dendritic cell | 0.376434729  | 8.791E-19 | 0.398416591  | 3.328E-20 |
| CSF3R    | Immature dendritic cell | -0.122764977 | 5.275E-03 | -0.132213686 | 3.271E-03 |
| SLC18A2  | Immature dendritic cell | -0.277703497 | 1.424E-10 | -0.294186465 | 2.675E-11 |
| AMPD2    | Immature dendritic cell | 0.121535461  | 5.752E-03 | 0.122478929  | 6.473E-03 |
| CLTB     | Immature dendritic cell | 0.015662599  | 7.228E-01 | 0.010273465  | 8.200E-01 |
| C1orf162 | Immature dendritic cell | -0.105436184 | 1.668E-02 | -0.10523135  | 1.944E-02 |
| AIF1     | Macrophage              | -0.034801841 | 4.305E-01 | -0.021178443 | 6.390E-01 |
| CCL1     | Macrophage              | 0.107163573  | 1.497E-02 | 0.121777928  | 6.787E-03 |
| CCL14    | Macrophage              | -0.401157212 | 0.000E+00 | -0.42425585  | 5.846E-23 |
| CCL23    | Macrophage              | -0.16403436  | 1.849E-04 | -0.172548498 | 1.179E-04 |
| CCL26    | Macrophage              | 0.426633927  | 3.403E-24 | 0.445313948  | 2.179E-25 |

|         |            |              |           |              |           |
|---------|------------|--------------|-----------|--------------|-----------|
| CD300LB | Macrophage | -0.096381564 | 2.874E-02 | -0.100078532 | 2.628E-02 |
| CNR1    | Macrophage | -0.252977381 | 5.815E-09 | -0.264861931 | 2.330E-09 |
| CNR2    | Macrophage | -0.195181735 | 8.135E-06 | -0.213214214 | 1.778E-06 |
| EIF1    | Macrophage | 0.147321739  | 7.981E-04 | 0.14138165   | 1.649E-03 |
| EIF4A1  | Macrophage | 0.413199526  | 0.000E+00 | 0.427843176  | 2.318E-23 |
| FPR1    | Macrophage | 0.097382568  | 2.715E-02 | 0.120372991  | 7.458E-03 |
| FPR2    | Macrophage | 0.182855932  | 2.982E-05 | 0.20552016   | 4.207E-06 |
| FRAT2   | Macrophage | -0.072961986 | 9.813E-02 | -0.07142609  | 1.132E-01 |
| GPR27   | Macrophage | -0.015481684 | 7.260E-01 | -0.014692252 | 7.449E-01 |
| GPR77   | Macrophage | -0.121159268 | 5.932E-03 | -0.141266234 | 1.664E-03 |
| RNASE2  | Macrophage | 0.154869977  | 4.198E-04 | 0.179183893  | 6.311E-05 |
| MS4A2   | Macrophage | -0.341410002 | 1.591E-15 | -0.351702116 | 8.432E-16 |
| BASP1   | Macrophage | 0.20132554   | 4.323E-06 | 0.201916494  | 6.227E-06 |
| IGSF6   | Macrophage | -0.048355156 | 2.734E-01 | -0.0366632   | 4.166E-01 |
| HK3     | Macrophage | 0.076445131  | 8.307E-02 | 0.092922557  | 3.917E-02 |
| VNN1    | Macrophage | 0.062177126  | 1.588E-01 | 0.079932176  | 7.621E-02 |
| FES     | Macrophage | -0.108452339 | 1.383E-02 | -0.109181683 | 1.529E-02 |
| NPL     | Macrophage | 0.022236972  | 6.146E-01 | 0.032834892  | 4.670E-01 |
| FZD2    | Macrophage | 0.048222759  | 2.746E-01 | 0.033239504  | 4.615E-01 |
| FAM198B | Macrophage | 0.09111788   | 3.876E-02 | 0.100770959  | 2.525E-02 |
| HNMT    | Macrophage | -0.347006685 | 6.139E-16 | -0.34593701  | 2.637E-15 |
| SLC15A3 | Macrophage | -0.044380116 | 3.147E-01 | -0.042368674 | 3.478E-01 |
| CD4     | Macrophage | -0.105518459 | 1.660E-02 | -0.100512001 | 2.563E-02 |
| TXNDC3  | Macrophage | -0.093420182 | 3.405E-02 | -0.094738602 | 3.547E-02 |
| FRMD4A  | Macrophage | 0.017407861  | 6.935E-01 | 0.02075413   | 6.457E-01 |
| CRYBB1  | Macrophage | -0.05894421  | 1.817E-01 | -0.042822042 | 3.427E-01 |

|          |            |              |           |              |           |
|----------|------------|--------------|-----------|--------------|-----------|
| HRH1     | Macrophage | 0.119199247  | 6.794E-03 | 0.131538112  | 3.434E-03 |
| WNT5B    | Macrophage | -0.007175558 | 8.709E-01 | -0.001923866 | 9.660E-01 |
| GIPR     | Eosinophil | -0.253319039 | 5.539E-09 | -0.263394646 | 2.874E-09 |
| LRMP     | Eosinophil | -0.123727502 | 4.951E-03 | -0.135320052 | 2.605E-03 |
| FOSB     | Eosinophil | -0.191715814 | 1.228E-05 | -0.198421098 | 9.051E-06 |
| RRP12    | Eosinophil | 0.241522579  | 3.160E-08 | 0.233450097  | 1.581E-07 |
| GPR183   | Eosinophil | -0.024685637 | 5.761E-01 | -0.024272005 | 5.908E-01 |
| NR4A3    | Eosinophil | -0.09304096  | 3.478E-02 | -0.101188917 | 2.465E-02 |
| ST3GAL6  | Eosinophil | -0.230539091 | 1.220E-07 | -0.219556959 | 8.533E-07 |
| DEPDC5   | Eosinophil | 0.107551045  | 1.465E-02 | 0.096037642  | 3.302E-02 |
| PDE6C    | Eosinophil | -0.0487475   | 2.695E-01 | -0.049736276 | 2.704E-01 |
| PKD2L2   | Eosinophil | -0.002636315 | 9.524E-01 | -0.012511146 | 7.817E-01 |
| GPR65    | Eosinophil | -0.027148534 | 5.387E-01 | -0.009334635 | 8.362E-01 |
| IL5RA    | Eosinophil | -0.189825054 | 1.445E-05 | -0.202129103 | 6.086E-06 |
| P2RY14   | Eosinophil | -0.224053879 | 2.994E-07 | -0.240073174 | 6.812E-08 |
| DACH1    | Eosinophil | -0.193940411 | 9.307E-06 | -0.19456538  | 1.357E-05 |
| DAPK2    | Eosinophil | -0.533878672 | 0.000E+00 | -0.550326103 | 2.233E-40 |
| EMR3     | Eosinophil | -0.121430018 | 5.794E-03 | -0.130224304 | 3.774E-03 |
| ADAMTS3  | Mast cell  | 0.186010188  | 2.156E-05 | 0.204560281  | 4.673E-06 |
| CPA3     | Mast cell  | -0.275362859 | 2.450E-10 | -0.282417303 | 1.712E-10 |
| CMA1     | Mast cell  | -0.283549646 | 5.597E-11 | -0.282409341 | 1.714E-10 |
| CTSG     | Mast cell  | -0.351400946 | 2.057E-16 | -0.353852462 | 5.478E-16 |
| ARHGAP15 | Mast cell  | -0.217825299 | 6.403E-07 | -0.232874365 | 1.699E-07 |
| CPM      | Mast cell  | -0.292250317 | 1.672E-11 | -0.31023222  | 1.850E-12 |
| FCN1     | Mast cell  | -0.13711934  | 1.830E-03 | -0.127399869 | 4.610E-03 |
| FTL      | Mast cell  | -0.031820299 | 4.712E-01 | -0.046364572 | 3.042E-01 |



|          |           |              |           |              |           |
|----------|-----------|--------------|-----------|--------------|-----------|
| HSPA6    | Mast cell | 0.185878188  | 2.185E-05 | 0.184299225  | 3.838E-05 |
| ITGA9    | Mast cell | -0.384093088 | 1.503E-19 | -0.390751025 | 1.970E-19 |
| RNASE3   | Mast cell | 0.082116792  | 6.258E-02 | 0.101020035  | 2.489E-02 |
| S100A4   | Mast cell | -0.173140769 | 8.023E-05 | -0.165518586 | 2.231E-04 |
| SIGLEC8  | Mast cell | -0.150558619 | 6.160E-04 | -0.160102382 | 3.585E-04 |
| SLC6A4   | Mast cell | -0.192296398 | 1.111E-05 | -0.193089287 | 1.581E-05 |
| PTGS2    | Mast cell | 0.141115112  | 1.337E-03 | 0.12658454   | 4.880E-03 |
| EGR3     | Mast cell | -0.060259187 | 1.721E-01 | -0.06802748  | 1.315E-01 |
| PILRA    | Mast cell | 0.0440815    | 3.180E-01 | 0.061222146  | 1.747E-01 |
| ASGR2    | Monocyte  | 0.109792382  | 1.266E-02 | 0.128411276  | 4.293E-03 |
| CFP      | Monocyte  | -0.227025592 | 1.912E-07 | -0.222886517 | 5.753E-07 |
| ASGR1    | Monocyte  | 0.028460457  | 5.192E-01 | 0.03707235   | 4.115E-01 |
| CD1D     | Monocyte  | -0.095100474 | 3.097E-02 | -0.085787195 | 5.698E-02 |
| UPK3A    | Monocyte  | -0.013350847 | 7.625E-01 | -0.023239173 | 6.067E-01 |
| ACTG1    | Monocyte  | 0.403137053  | 1.514E-21 | 0.413458719  | 8.859E-22 |
| ANXA5    | Monocyte  | 0.090666311  | 3.974E-02 | 0.103717136  | 2.126E-02 |
| ATP6V1B2 | Monocyte  | 0.070636054  | 1.093E-01 | 0.079062855  | 7.947E-02 |
| CFL1     | Monocyte  | 0.469579171  | 0.000E+00 | 0.477650581  | 1.834E-29 |
| DAZAP2   | Monocyte  | 0.067156511  | 1.280E-01 | 0.069680706  | 1.223E-01 |
| CTBS     | Monocyte  | 0.194269907  | 8.981E-06 | 0.190748682  | 2.010E-05 |
| EMR4P    | Monocyte  | -0.175120445 | 6.459E-05 | -0.186901962 | 2.964E-05 |
| HIVEP2   | Monocyte  | 0.182357262  | 3.234E-05 | 0.191186271  | 1.922E-05 |
| MARCKSL1 | Monocyte  | 0.333524357  | 1.019E-14 | 0.324585505  | 1.472E-13 |
| MBP      | Monocyte  | 0.023177273  | 5.996E-01 | 0.034492684  | 4.448E-01 |
| MMP15    | Monocyte  | -0.291710279 | 1.827E-11 | -0.313938072 | 9.749E-13 |
| PNPLA6   | Monocyte  | 0.021451646  | 6.271E-01 | 0.016940585  | 7.075E-01 |

|           |            |              |           |              |           |
|-----------|------------|--------------|-----------|--------------|-----------|
| TMBIM6    | Monocyte   | 0.072153642  | 1.019E-01 | 0.069434963  | 1.236E-01 |
| PQBP1     | Monocyte   | 0.144249311  | 1.028E-03 | 0.140810205  | 1.723E-03 |
| TEX264    | Monocyte   | -0.296832038 | 6.182E-12 | -0.301104026 | 8.628E-12 |
| IKZF1     | Monocyte   | -0.097132711 | 2.755E-02 | -0.095262902 | 3.446E-02 |
| CREB5     | Neutrophil | 0.040692799  | 3.566E-01 | 0.057107142  | 2.056E-01 |
| CDA       | Neutrophil | 0.198883728  | 5.663E-06 | 0.212949889  | 1.832E-06 |
| CHST15    | Neutrophil | 0.107244218  | 1.490E-02 | 0.122270666  | 6.565E-03 |
| S100A12   | Neutrophil | 0.133280794  | 2.439E-03 | 0.154391091  | 5.817E-04 |
| APOBEC3A  | Neutrophil | 0.227994797  | 1.691E-07 | 0.245793994  | 3.226E-08 |
| CASP5     | Neutrophil | 0.290808378  | 1.703E-11 | 0.321059612  | 2.776E-13 |
| MMP25     | Neutrophil | 0.056369279  | 2.016E-01 | 0.067683493  | 1.334E-01 |
| HAL       | Neutrophil | 0.035841417  | 4.170E-01 | 0.034082911  | 4.502E-01 |
| C1orf183  | Neutrophil | -0.173247076 | 7.751E-05 | -0.180935914 | 5.331E-05 |
| FFAR2     | Neutrophil | 0.157693288  | 3.276E-04 | 0.157656915  | 4.420E-04 |
| MAK       | Neutrophil | -0.06832787  | 1.215E-01 | -0.075662649 | 9.332E-02 |
| CXCR1     | Neutrophil | -0.069540024 | 1.150E-01 | -0.058033892 | 1.983E-01 |
| STEAP4    | Neutrophil | -0.277614291 | 1.730E-10 | -0.287524748 | 7.730E-11 |
| MGAM      | Neutrophil | 0.017372804  | 6.941E-01 | 0.001296141  | 9.771E-01 |
| BTNL8     | Neutrophil | -0.219286544 | 5.018E-07 | -0.226565325 | 3.695E-07 |
| CXCR2     | Neutrophil | -0.127655363 | 3.732E-03 | -0.121273006 | 7.022E-03 |
| TNFRSF10C | Neutrophil | -0.273669788 | 2.676E-10 | -0.281334462 | 2.022E-10 |
| VNN3      | Neutrophil | -0.010769335 | 8.074E-01 | -0.004312928 | 9.239E-01 |
| CCL1      | chemokine  | 0.107163573  | 1.497E-02 | 0.121777928  | 6.787E-03 |
| CCL2      | chemokine  | 0.114885619  | 9.099E-03 | 0.130819325  | 3.617E-03 |
| CCL3      | chemokine  | 0.227793821  | 1.877E-07 | 0.247526633  | 2.563E-08 |
| CCL4      | chemokine  | 0.278366854  | 1.282E-10 | 0.318943179  | 4.046E-13 |

|        |           |              |           |              |           |
|--------|-----------|--------------|-----------|--------------|-----------|
| CCL5   | chemokine | 0.117288514  | 7.712E-03 | 0.14391605   | 1.355E-03 |
| CCL7   | chemokine | 0.386850441  | 7.868E-20 | 0.395827694  | 6.099E-20 |
| CCL8   | chemokine | 0.340526227  | 2.465E-15 | 0.365255903  | 5.261E-17 |
| CCL11  | chemokine | 0.275099418  | 2.142E-10 | 0.300081131  | 1.022E-11 |
| CCL13  | chemokine | -0.09654778  | 2.850E-02 | -0.087620692 | 5.186E-02 |
| CCL14  | chemokine | -0.401157212 | 0.000E+00 | -0.42425585  | 5.846E-23 |
| CCL15  | chemokine | -0.080604861 | 6.759E-02 | -0.078016783 | 8.354E-02 |
| CCL16  | chemokine | -0.29602484  | 7.092E-12 | -0.305539589 | 4.110E-12 |
| CCL17  | chemokine | -0.296163295 | 6.927E-12 | -0.303793509 | 5.512E-12 |
| CCL18  | chemokine | 0.074463016  | 9.140E-02 | 0.096165997  | 3.278E-02 |
| CCL19  | chemokine | -0.214475956 | 9.551E-07 | -0.227228872 | 3.408E-07 |
| CCL20  | chemokine | 0.159605425  | 2.763E-04 | 0.169788161  | 1.519E-04 |
| CCL21  | chemokine | 0.022993834  | 6.025E-01 | 0.047277888  | 2.948E-01 |
| CCL22  | chemokine | -0.16572085  | 1.582E-04 | -0.170827963 | 1.382E-04 |
| CCL23  | chemokine | -0.16403436  | 1.849E-04 | -0.172548498 | 1.179E-04 |
| CCL24  | chemokine | 0.147395591  | 7.932E-04 | 0.161328779  | 3.224E-04 |
| CCL25  | chemokine | 0.115572488  | 8.660E-03 | 0.126004419  | 5.081E-03 |
| CCL26  | chemokine | 0.426633927  | 3.403E-24 | 0.445313948  | 2.179E-25 |
| CCL27  | chemokine | 0.028438358  | 5.196E-01 | 0.033161507  | 4.626E-01 |
| CCL28  | chemokine | 0.058377443  | 1.859E-01 | 0.04834613   | 2.840E-01 |
| CX3CL1 | chemokine | -0.185742976 | 2.290E-05 | -0.189516311 | 2.278E-05 |
| CXCL1  | chemokine | 0.090407669  | 4.031E-02 | 0.090274336  | 4.513E-02 |
| CXCL2  | chemokine | -0.101965468 | 2.068E-02 | -0.105477748 | 1.915E-02 |
| CXCL3  | chemokine | 0.059128243  | 1.803E-01 | 0.060061996  | 1.831E-01 |
| CXCL5  | chemokine | 0.187581671  | 1.894E-05 | 0.197524469  | 9.951E-06 |
| CXCL6  | chemokine | 0.154807395  | 4.221E-04 | 0.165884325  | 2.160E-04 |

|        |           |              |           |              |           |
|--------|-----------|--------------|-----------|--------------|-----------|
| CXCL9  | chemokine | 0.248969605  | 1.149E-08 | 0.286906162  | 8.519E-11 |
| CXCL10 | chemokine | 0.36821805   | 0.000E+00 | 0.414009792  | 7.730E-22 |
| CXCL11 | chemokine | 0.281575631  | 7.690E-11 | 0.328394242  | 7.347E-14 |
| CXCL12 | chemokine | -0.117837598 | 7.458E-03 | -0.123519105 | 6.030E-03 |
| CXCL13 | chemokine | 0.03399543   | 4.413E-01 | 0.049471622  | 2.729E-01 |
| CXCL14 | chemokine | -0.25097944  | 8.697E-09 | -0.258322523 | 5.878E-09 |
| CXCL16 | chemokine | -0.362247673 | 1.079E-17 | -0.371553581 | 1.385E-17 |
| CXCL17 | chemokine | -0.38448764  | 1.371E-19 | -0.381814751 | 1.477E-18 |
| XCL1   | chemokine | 0.203984314  | 3.056E-06 | 0.214587202  | 1.520E-06 |
| XCL2   | chemokine | 0.106793185  | 1.533E-02 | 0.124959725  | 5.463E-03 |
| CCR1   | receptor  | 0.113211738  | 1.017E-02 | 0.138623412  | 2.035E-03 |
| CCR2   | receptor  | -0.112621359 | 1.057E-02 | -0.111331041 | 1.338E-02 |
| CCR3   | receptor  | -0.065403136 | 1.383E-01 | -0.054723554 | 2.252E-01 |
| CCR4   | receptor  | -0.11498986  | 9.005E-03 | -0.125503296 | 5.261E-03 |
| CCR5   | receptor  | 0.063536314  | 1.499E-01 | 0.093098352  | 3.879E-02 |
| CCR6   | receptor  | -0.296828122 | 7.828E-12 | -0.329093504 | 6.461E-14 |
| CCR7   | receptor  | -0.177681412 | 5.157E-05 | -0.200038396 | 7.619E-06 |
| CCR8   | receptor  | 0.10044978   | 2.262E-02 | 0.123696469  | 5.958E-03 |
| CCR9   | receptor  | -0.159458796 | 2.800E-04 | -0.166150576 | 2.109E-04 |
| CCR10  | receptor  | 0.080173213  | 6.909E-02 | 0.076945474  | 8.789E-02 |
| CXCR1  | receptor  | -0.069540024 | 1.150E-01 | -0.058033892 | 1.983E-01 |
| CXCR2  | receptor  | -0.127655363 | 3.732E-03 | -0.121273006 | 7.022E-03 |
| CXCR3  | receptor  | 0.027024308  | 5.405E-01 | 0.034829731  | 4.403E-01 |
| CXCR4  | receptor  | -0.037994892 | 3.894E-01 | -0.04236023  | 3.479E-01 |
| CXCR5  | receptor  | -0.129812089 | 3.185E-03 | -0.14478077  | 1.266E-03 |
| CXCR6  | receptor  | 0.06540813   | 1.382E-01 | 0.08114484   | 7.184E-02 |

|          |                 |              |           |              |           |
|----------|-----------------|--------------|-----------|--------------|-----------|
| XCR1     | receptor        | -0.180328858 | 3.852E-05 | -0.177926175 | 7.118E-05 |
| CX3CR1   | receptor        | -0.385619893 | 0.000E+00 | -0.395608913 | 6.417E-20 |
| B2M      | MHC             | 0.048253947  | 2.743E-01 | 0.072827167  | 1.063E-01 |
| HLA-A    | MHC             | 0.034881086  | 4.296E-01 | 0.024711584  | 5.841E-01 |
| HLA-B    | MHC             | 0.031682324  | 4.730E-01 | 0.039396667  | 3.827E-01 |
| HLA-C    | MHC             | 0.03540452   | 4.227E-01 | 0.032720833  | 4.685E-01 |
| HLA-DMA  | MHC             | -0.38955198  | 4.147E-20 | -0.401481988 | 1.613E-20 |
| HLA-DMB  | MHC             | -0.172541605 | 8.498E-05 | -0.175518258 | 8.940E-05 |
| HLA-DOA  | MHC             | -0.226531799 | 2.199E-07 | -0.232252442 | 1.836E-07 |
| HLA-DOB  | MHC             | -0.226148278 | 2.137E-07 | -0.240141681 | 6.752E-08 |
| HLA-DPA1 | MHC             | -0.25197869  | 7.566E-09 | -0.25862062  | 5.638E-09 |
| HLA-DPB1 | MHC             | -0.330364083 | 1.403E-14 | -0.347789815 | 1.833E-15 |
| HLA-DQA1 | MHC             | -0.131097832 | 2.895E-03 | -0.137409253 | 2.230E-03 |
| HLA-DQA2 | MHC             | -0.114892166 | 9.064E-03 | -0.114491542 | 1.096E-02 |
| HLA-DQB1 | MHC             | -0.259285288 | 2.340E-09 | -0.265030895 | 2.274E-09 |
| HLA-DRA  | MHC             | -0.244882904 | 2.010E-08 | -0.254753042 | 9.637E-09 |
| HLA-DRB1 | MHC             | -0.306544415 | 1.492E-12 | -0.326567672 | 1.026E-13 |
| HLA-E    | MHC             | -0.096091203 | 2.926E-02 | -0.096457776 | 3.225E-02 |
| HLA-F    | MHC             | -0.03446009  | 4.352E-01 | -0.033303389 | 4.606E-01 |
| HLA-G    | MHC             | 0.083406589  | 5.858E-02 | 0.082324686  | 6.780E-02 |
| TAP1     | MHC             | 0.370574819  | 0.000E+00 | 0.402919373  | 1.146E-20 |
| TAP2     | MHC             | 0.331655975  | 1.093E-14 | 0.347268372  | 2.031E-15 |
| TAPBP    | MHC             | 0.032591524  | 4.604E-01 | 0.037622912  | 4.045E-01 |
| ADORA2A  | Immunoinhibitor | -0.110873993 | 1.181E-02 | -0.109019779 | 1.545E-02 |
| BTLA     | Immunoinhibitor | -0.117917287 | 7.388E-03 | -0.115642597 | 1.018E-02 |
| CD160    | Immunoinhibitor | -0.048398818 | 2.728E-01 | -0.053881382 | 2.324E-01 |

|          |                  |              |           |              |           |
|----------|------------------|--------------|-----------|--------------|-----------|
| CD244    | Immunoinhibitor  | 0.036171572  | 4.126E-01 | 0.050562661  | 2.625E-01 |
| CD274    | Immunoinhibitor  | 0.303624201  | 1.916E-12 | 0.335884816  | 1.821E-14 |
| CD96     | Immunoinhibitor  | -0.029361882 | 5.061E-01 | -0.028573118 | 5.268E-01 |
| CSF1R    | Immunoinhibitor  | -0.019182072 | 6.641E-01 | -0.004548127 | 9.198E-01 |
| CTLA4    | Immunoinhibitor  | 0.096212793  | 2.906E-02 | 0.125333523  | 5.323E-03 |
| HAVCR2   | Immunoinhibitor  | 0.105039565  | 1.714E-02 | 0.130824277  | 3.615E-03 |
| IDO1     | Immunoinhibitor  | 0.189285422  | 1.586E-05 | 0.209188051  | 2.801E-06 |
| IL10     | Immunoinhibitor  | 0.084929011  | 5.409E-02 | 0.107435426  | 1.702E-02 |
| IL10RB   | Immunoinhibitor  | 0.159117788  | 2.935E-04 | 0.151493834  | 7.390E-04 |
| KDR      | Immunoinhibitor  | -0.066434527 | 1.321E-01 | -0.068440902 | 1.291E-01 |
| KIR2DL1  | Immunoinhibitor  | 0.030925687  | 4.838E-01 | 0.033483627  | 4.582E-01 |
| KIR2DL3  | Immunoinhibitor  | 0.17872658   | 4.523E-05 | 0.194823318  | 1.321E-05 |
| LAG3     | Immunoinhibitor  | 0.234697646  | 7.766E-08 | 0.262922499  | 3.074E-09 |
| LGALS9   | Immunoinhibitor  | -0.084243751 | 5.606E-02 | -0.083538994 | 6.383E-02 |
| PDCD1    | Immunoinhibitor  | 0.180381347  | 3.832E-05 | 0.215009209  | 1.448E-06 |
| PDCD1LG2 | Immunoinhibitor  | 0.208329607  | 1.957E-06 | 0.253217589  | 1.189E-08 |
| PVRL2    | Immunoinhibitor  | 0.187343196  | 1.876E-05 | 0.179684295  | 6.015E-05 |
| TGFB1    | Immunoinhibitor  | -0.065384321 | 1.384E-01 | -0.066571942 | 1.399E-01 |
| TGFBR1   | Immunoinhibitor  | 0.095539043  | 3.017E-02 | 0.09561451   | 3.380E-02 |
| TIGIT    | Immunoinhibitor  | 0.120227225  | 6.329E-03 | 0.156154902  | 5.018E-04 |
| VTCN1    | Immunoinhibitor  | 0.006327241  | 8.861E-01 | 0.00685699   | 8.793E-01 |
| BTNL2    | Immunostimulator | 0.056747787  | 1.985E-01 | 0.071980364  | 1.104E-01 |
| C10orf54 | Immunostimulator | -0.125055683 | 4.480E-03 | -0.126096647 | 5.049E-03 |
| CD27     | Immunostimulator | -0.132012479 | 2.703E-03 | -0.139294974 | 1.934E-03 |
| CD276    | Immunostimulator | 0.376408285  | 8.844E-19 | 0.380315232  | 2.059E-18 |
| CD28     | Immunostimulator | -0.063621181 | 1.493E-01 | -0.057193719 | 2.049E-01 |

|           |                  |              |           |              |           |
|-----------|------------------|--------------|-----------|--------------|-----------|
| CD40      | Immunostimulator | 0.038903083  | 3.783E-01 | 0.04527159   | 3.158E-01 |
| CD40LG    | Immunostimulator | -0.299628259 | 3.831E-12 | -0.31621692  | 6.546E-13 |
| CD48      | Immunostimulator | -0.111311545 | 1.151E-02 | -0.110958691 | 1.370E-02 |
| CD70      | Immunostimulator | 0.160494625  | 2.551E-04 | 0.190670031  | 2.026E-05 |
| CD80      | Immunostimulator | 0.068980624  | 1.179E-01 | 0.083893914  | 6.270E-02 |
| CD86      | Immunostimulator | 0.091801823  | 3.731E-02 | 0.116321259  | 9.739E-03 |
| CXCL12    | Immunostimulator | -0.117837598 | 7.458E-03 | -0.123519105 | 6.030E-03 |
| CXCR4     | Immunostimulator | -0.037994892 | 3.894E-01 | -0.04236023  | 3.479E-01 |
| ENTPD1    | Immunostimulator | 0.025034768  | 5.707E-01 | 0.034539835  | 4.442E-01 |
| HHLA2     | Immunostimulator | -0.210719715 | 1.403E-06 | -0.224554674 | 4.711E-07 |
| ICOS      | Immunostimulator | 0.074451771  | 9.145E-02 | 0.097777501  | 2.995E-02 |
| ICOSLG    | Immunostimulator | -0.020704975 | 6.391E-01 | -0.021825478 | 6.288E-01 |
| IL2RA     | Immunostimulator | 0.266749929  | 7.719E-10 | 0.305650797  | 4.034E-12 |
| IL6       | Immunostimulator | 0.287408781  | 2.986E-11 | 0.302668112  | 6.652E-12 |
| IL6R      | Immunostimulator | -0.320486834 | 1.227E-13 | -0.332046677 | 3.740E-14 |
| KLRC1     | Immunostimulator | 0.234030736  | 7.748E-08 | 0.253466249  | 1.150E-08 |
| KLRK1     | Immunostimulator | 0.036238253  | 4.117E-01 | 0.043216551  | 3.383E-01 |
| LTA       | Immunostimulator | -0.057549377 | 1.923E-01 | -0.04387497  | 3.310E-01 |
| MICB      | Immunostimulator | 0.353253275  | 1.437E-16 | 0.363955815  | 6.905E-17 |
| NT5E      | Immunostimulator | -0.000747769 | 9.865E-01 | -0.002668441 | 9.529E-01 |
| PVR       | Immunostimulator | 0.396243717  | 0.000E+00 | 0.38852205   | 3.274E-19 |
| RAET1E    | Immunostimulator | 0.285624423  | 3.998E-11 | 0.297679019  | 1.517E-11 |
| TMEM173   | Immunostimulator | -0.366481617 | 9.577E-19 | -0.371233957 | 1.483E-17 |
| TMIGD2    | Immunostimulator | 0.038508007  | 3.832E-01 | 0.042898609  | 3.418E-01 |
| TNFRSF13B | Immunostimulator | -0.293882126 | 1.019E-11 | -0.321915148 | 2.381E-13 |
| TNFRSF13C | Immunostimulator | -0.010381254 | 8.142E-01 | -0.011241074 | 8.034E-01 |

|          |                  |              |           |              |           |
|----------|------------------|--------------|-----------|--------------|-----------|
| TNFRSF14 | Immunostimulator | -0.223952144 | 3.032E-07 | -0.248145648 | 2.360E-08 |
| TNFRSF17 | Immunostimulator | -0.139554447 | 1.499E-03 | -0.138921287 | 1.990E-03 |
| TNFRSF18 | Immunostimulator | 0.162496563  | 2.167E-04 | 0.168264166  | 1.745E-04 |
| TNFRSF25 | Immunostimulator | 0.046403129  | 2.932E-01 | 0.03527946   | 4.345E-01 |
| TNFRSF4  | Immunostimulator | 0.026224223  | 5.525E-01 | 0.027228246  | 5.464E-01 |
| TNFRSF8  | Immunostimulator | 0.054885777  | 2.136E-01 | 0.081677486  | 6.999E-02 |
| TNFRSF9  | Immunostimulator | 0.288128317  | 2.653E-11 | 0.334040111  | 2.577E-14 |
| TNFSF13  | Immunostimulator | -0.400056024 | 3.250E-21 | -0.40876331  | 2.803E-21 |
| TNFSF13B | Immunostimulator | 0.129169613  | 3.340E-03 | 0.155591693  | 5.262E-04 |
| TNFSF14  | Immunostimulator | -0.136811687 | 1.859E-03 | -0.14786447  | 9.916E-04 |
| TNFSF15  | Immunostimulator | -0.172909889 | 8.203E-05 | -0.180254501 | 5.694E-05 |
| TNFSF18  | Immunostimulator | -0.021836196 | 6.210E-01 | -0.031927271 | 4.794E-01 |
| TNFSF4   | Immunostimulator | 0.311350904  | 6.413E-13 | 0.337259291  | 1.404E-14 |
| TNFSF9   | Immunostimulator | 0.062590742  | 1.560E-01 | 0.05503442   | 2.225E-01 |
| ULBP1    | Immunostimulator | 0.212393466  | 1.221E-06 | 0.190643828  | 2.032E-05 |

---

LUAD: lung adenocarcinoma.
